# Supplementary material for: FGF8-mediated gene regulation affects regional identity in human cerebral organoids
Source: eLife journal article supplement (doi:10.7554/elife.98096), 2024-11-01
Supplement: fig3-figsupp1-data5 [file elife-98096-fig3-figsupp1-data5-v2.pdf]

# S21306 – Trajectory analysis: FGF8 ventral cells

Matthieu Jung

16 September, 2022

## Data used for trajectory inference

NULL Input data correspond to the 10X Genomics A02 data.

Only FGF8 cells belonging to cluster 6, 7, 8, 9 or 13 have been kept for further analysis.

Data were normalized with the log normalize method before inferring trajectory.

Only genes with more than 5 UMI count(s) detected in at least 10 cell(s) have been kept for the analysis.

Final data used in this analysis contain **4608 cells** and **5382 genes**.

Cells are distributed as follows:

| Cluster | Number of cells |
|---------|-----------------|
| 6       | 776             |
| 7       | 993             |
| 8       | 1231            |
| 9       | 1230            |
| 13      | 378             |

## Trajectory inference

Trajectory inference was performed using slingshot method (K et al. 2018) implemented in the `dyno` package (W et al. 2019).

Following figures represent the inferred trajectory in different situation as described in their legends.

## Trajectory differential expression

The goal is to estimate genes where the expression changes in cells at a given milestone. Following figure provide a global overview of the 100 most predictive genes that change anywhere in the trajectory.

Following figures represent heatmaps of genes with an expression changing in cells at a given milestone and the inferred trajectory of the first four genes for each milestone.

The file `feature_importances.tsv` provides the gene overall importance and importance at each milestone.

## Version of R and R packages

```
## R version 4.1.1 (2021-08-10)
## Platform: x86_64-conda-linux-gnu (64-bit)
## Running under: Debian GNU/Linux 11 (bullseye)
```

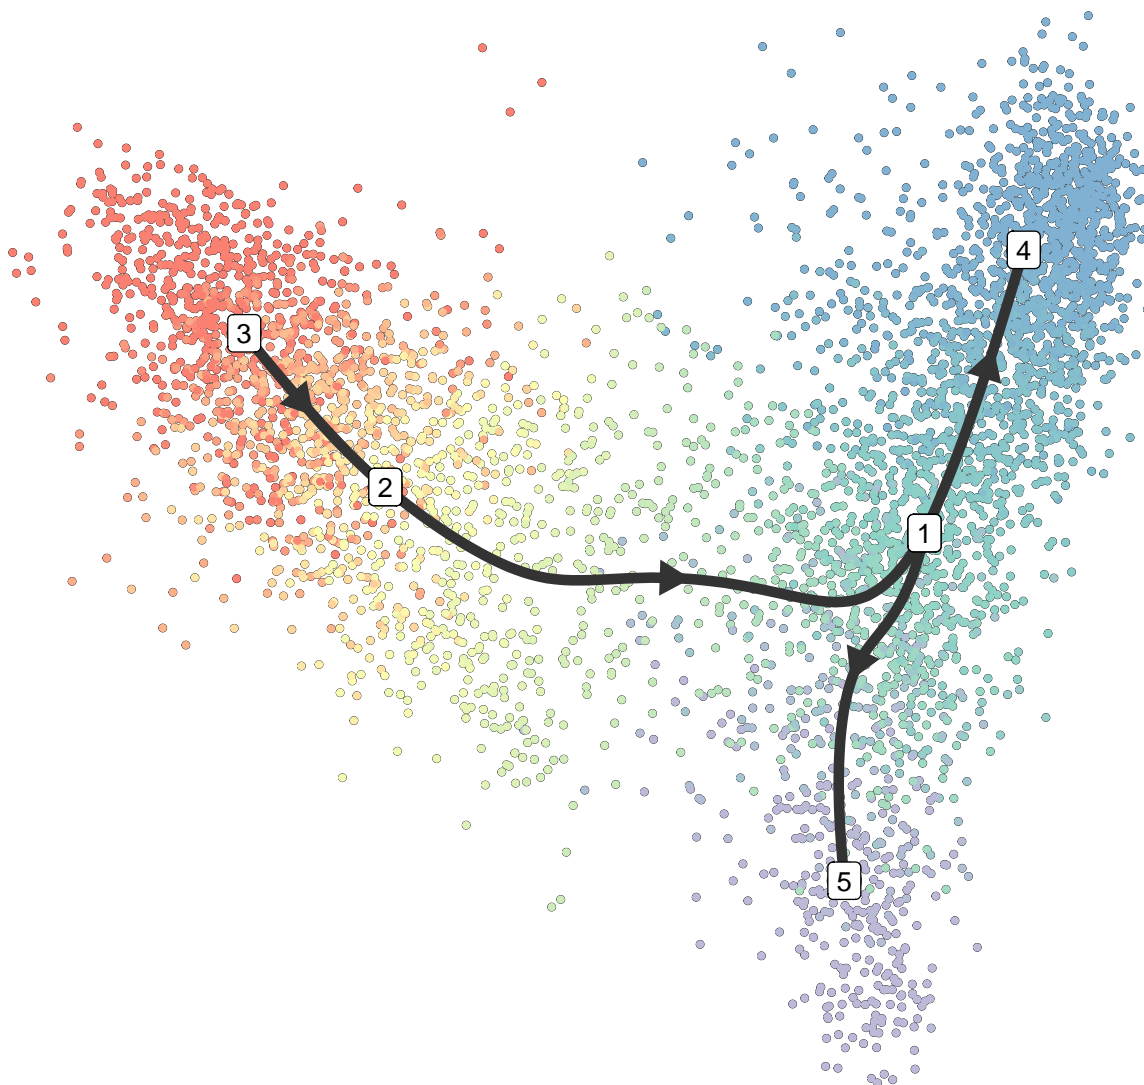

Figure 1: Trajectory colored by cell ordering in which every milestone gets a color and the color changes gradually between the milestones.

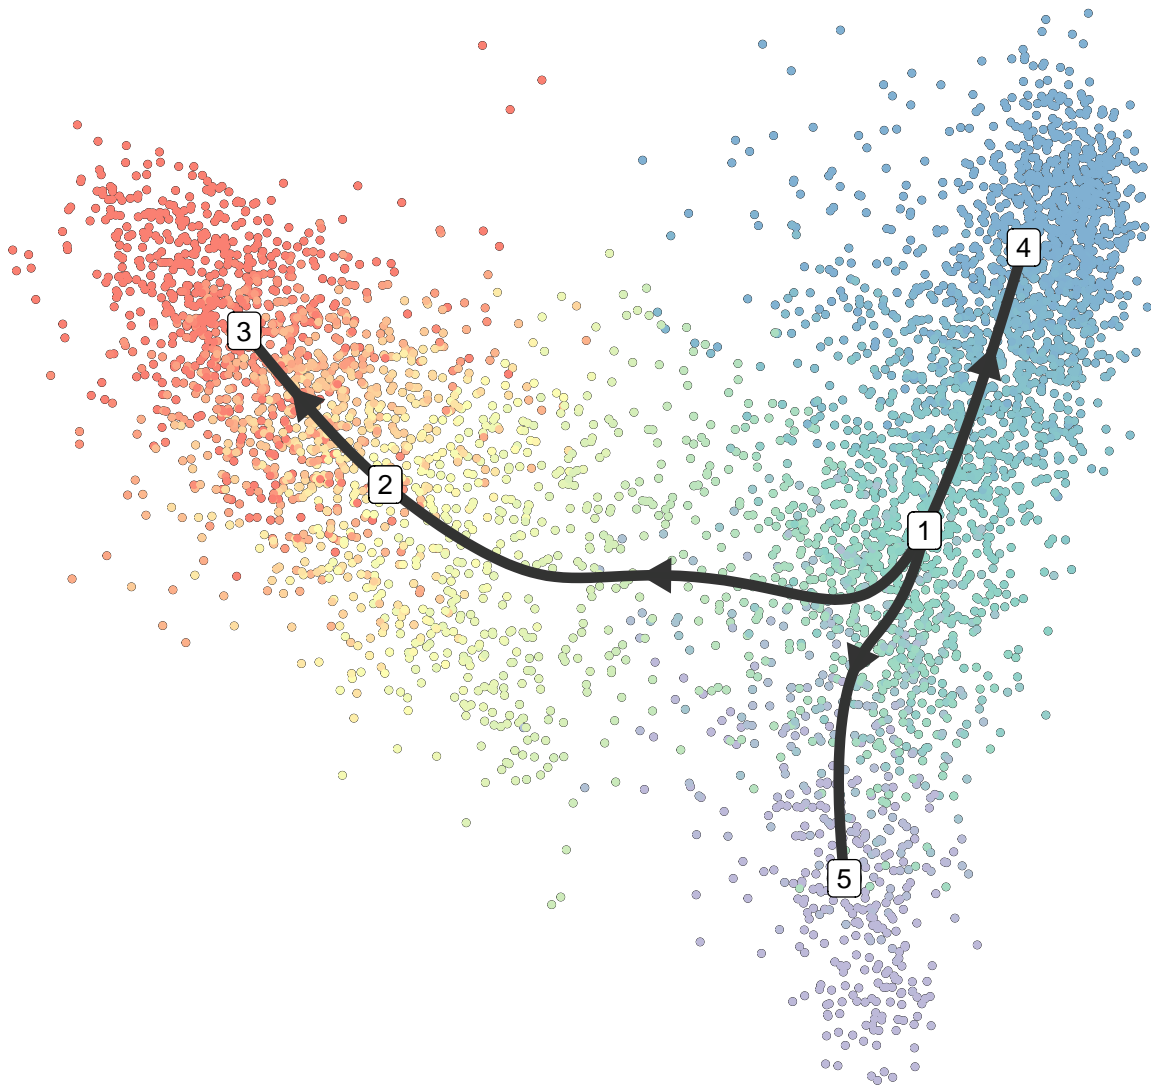

Figure 2: Trajectory colored by cell ordering after rooting. Chosen root correspond to the milestone labelled '1'.

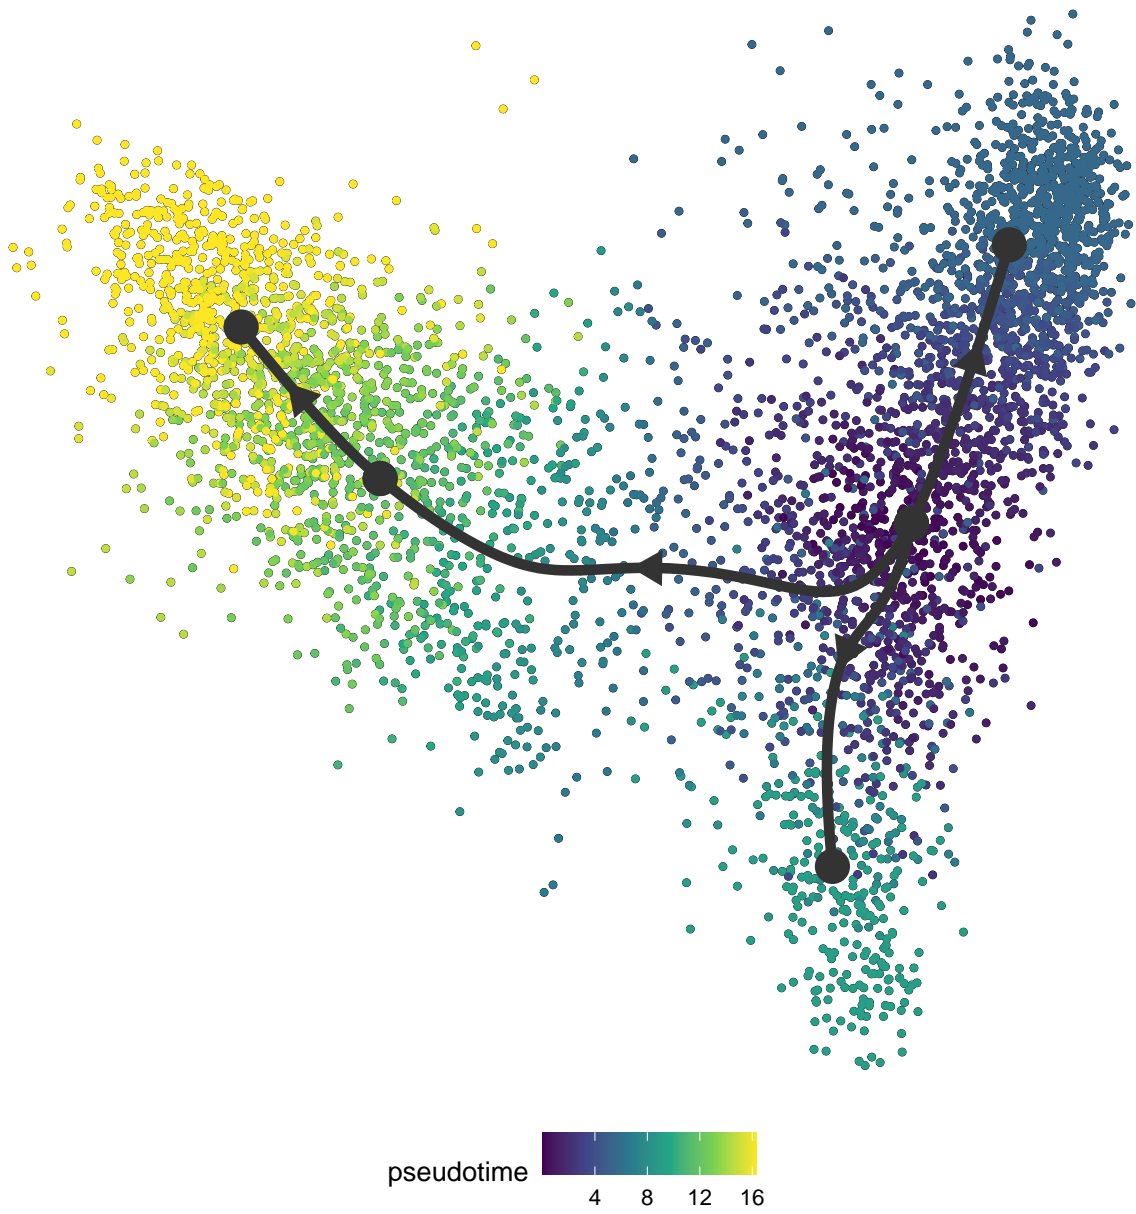

Figure 3: Trajectory colored by pseudotime (the distance to the root milestone).



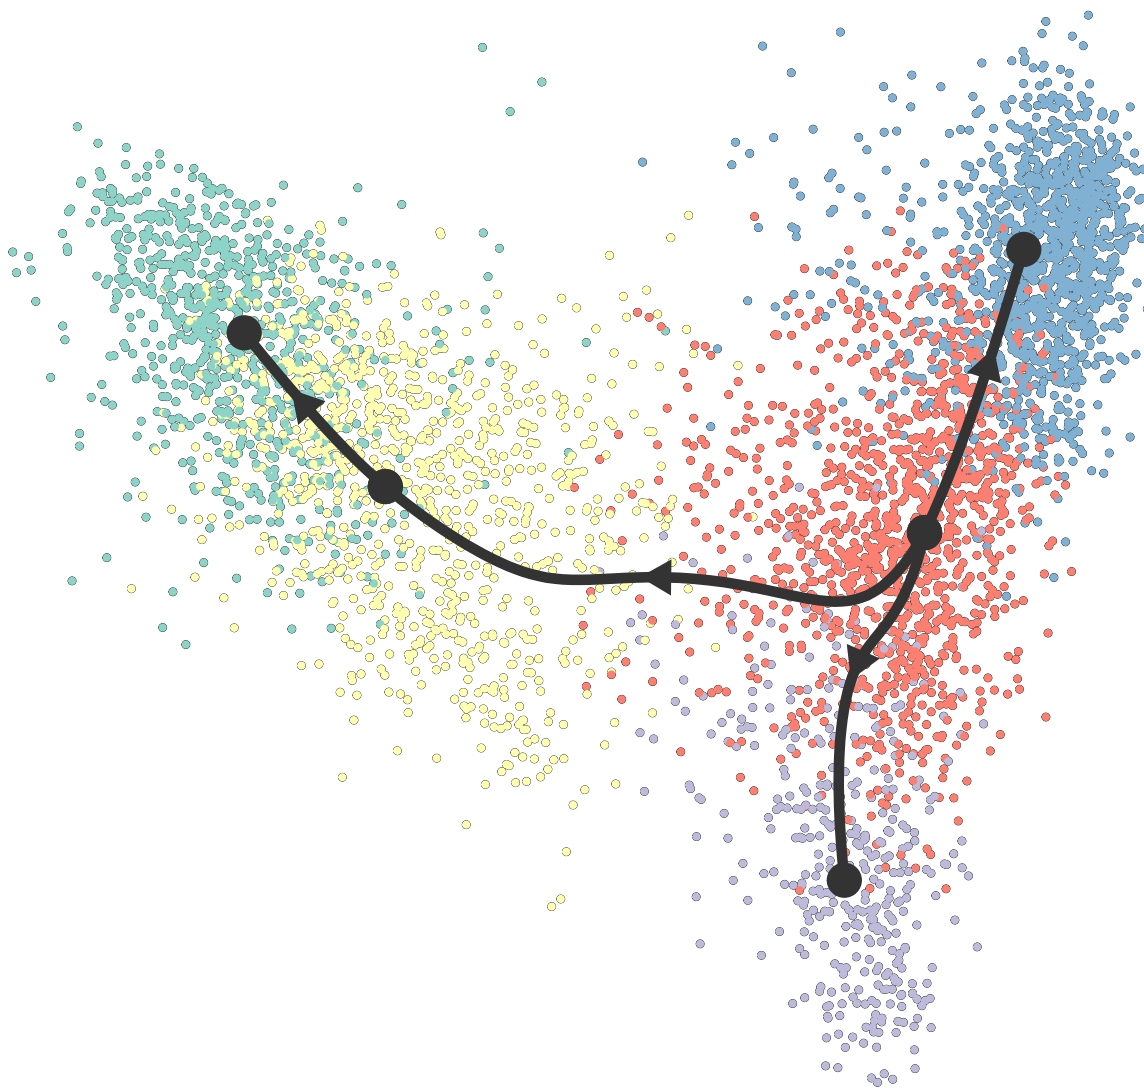

grouping    • 8    • 7    • 6    • 9    • 13

Figure 4: Trajectory colored by cell cluster

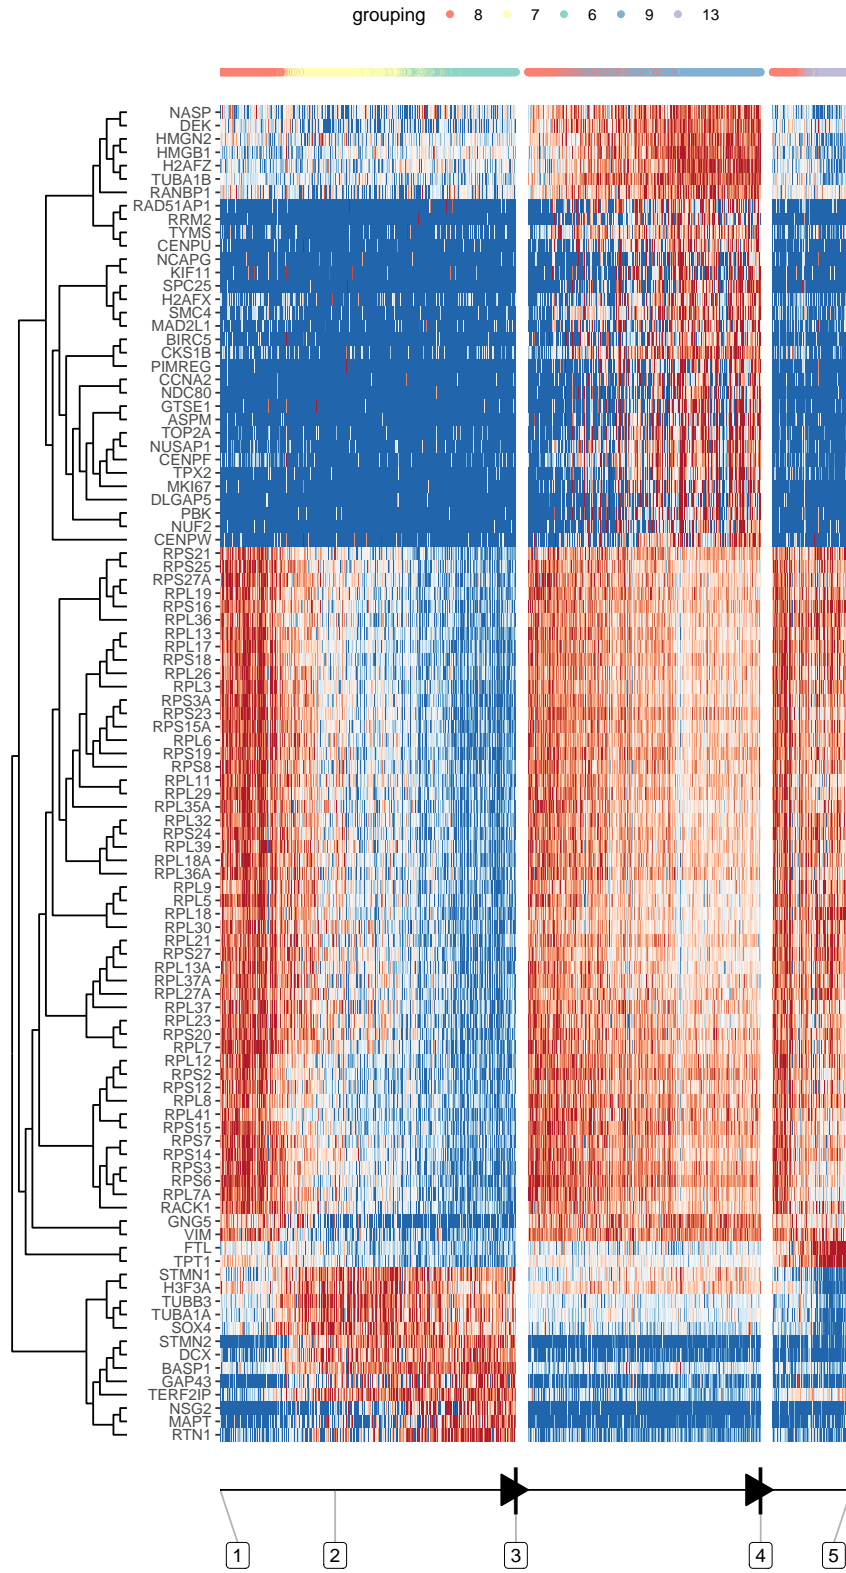

Figure 5: Heatmap representing the 100 most predictive genes that change anywhere in the trajectory.

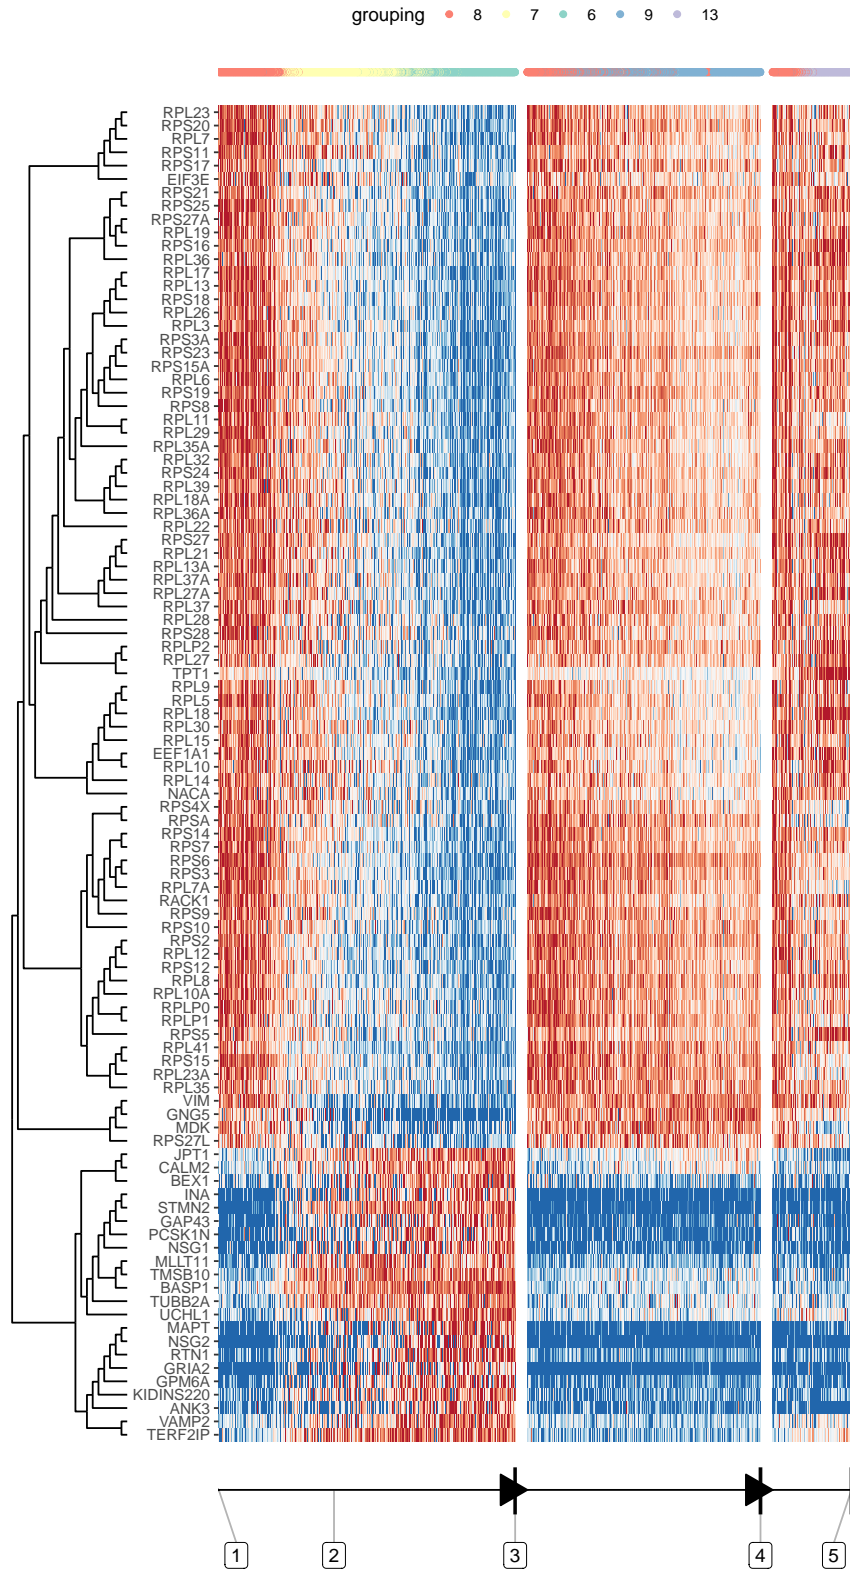

Figure 6: Heatmap representing 100 genes with an expression changing at milestone labelled '2'.

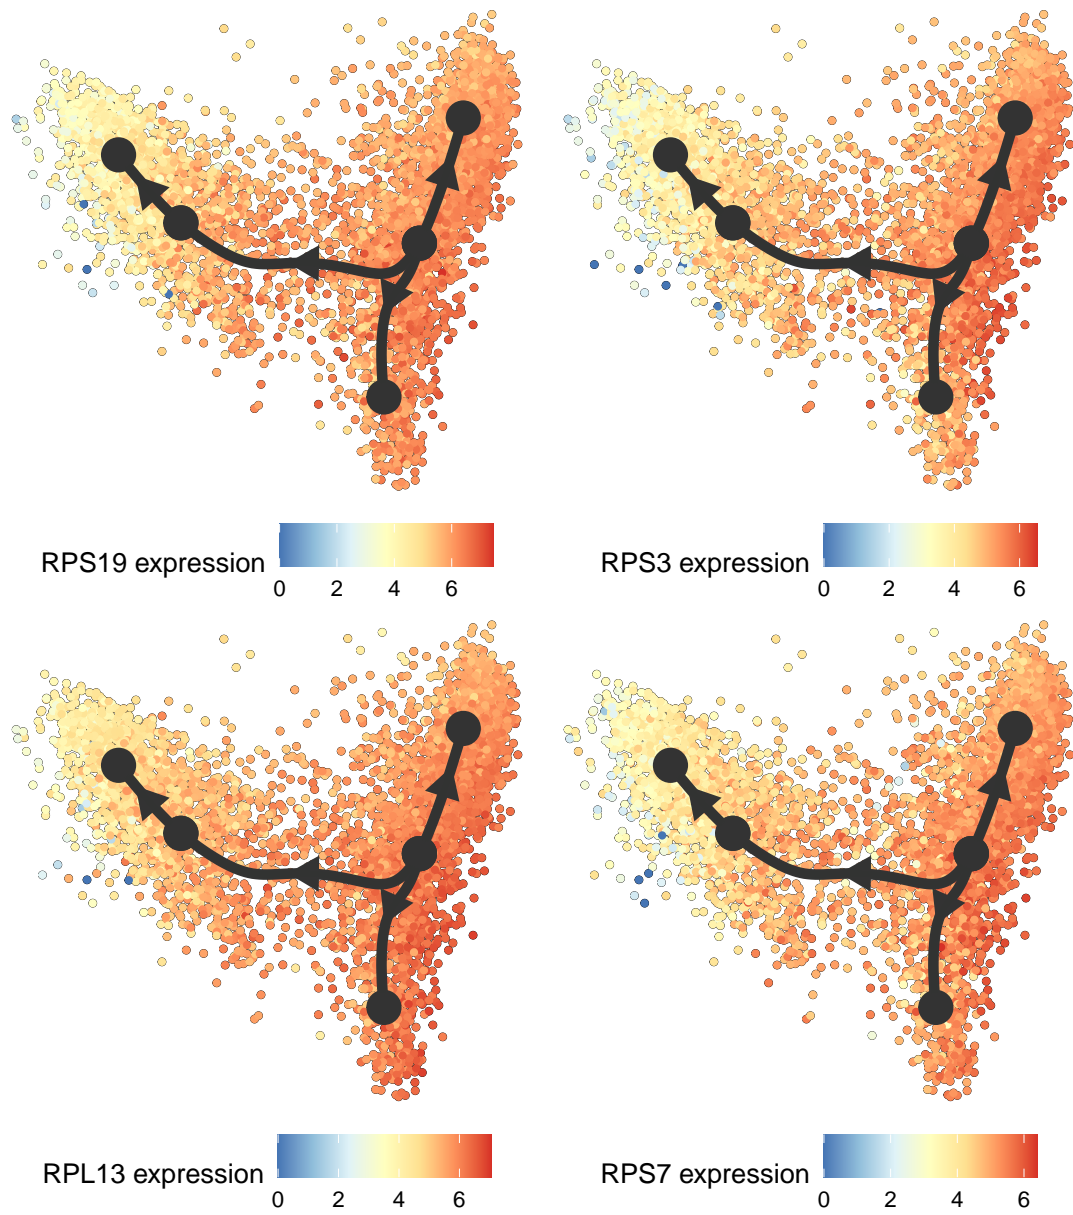

Figure 7: Four first genes with an expression changing at milestone labelled '2' represented on the inferred trajectory.

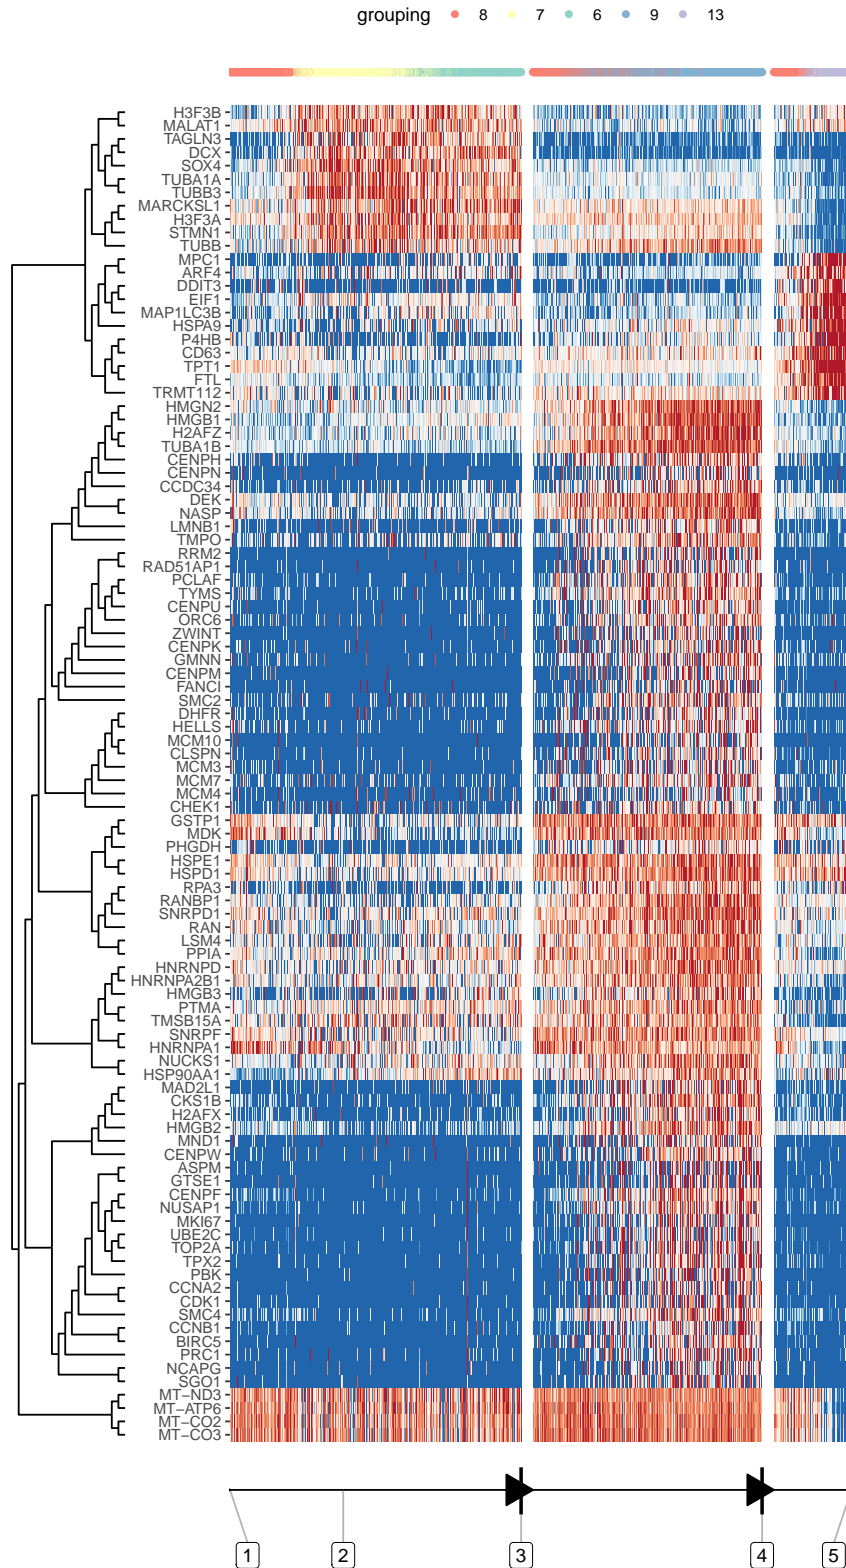

Figure 8: Heatmap representing 100 genes with an expression changing at milestone labelled '1'.

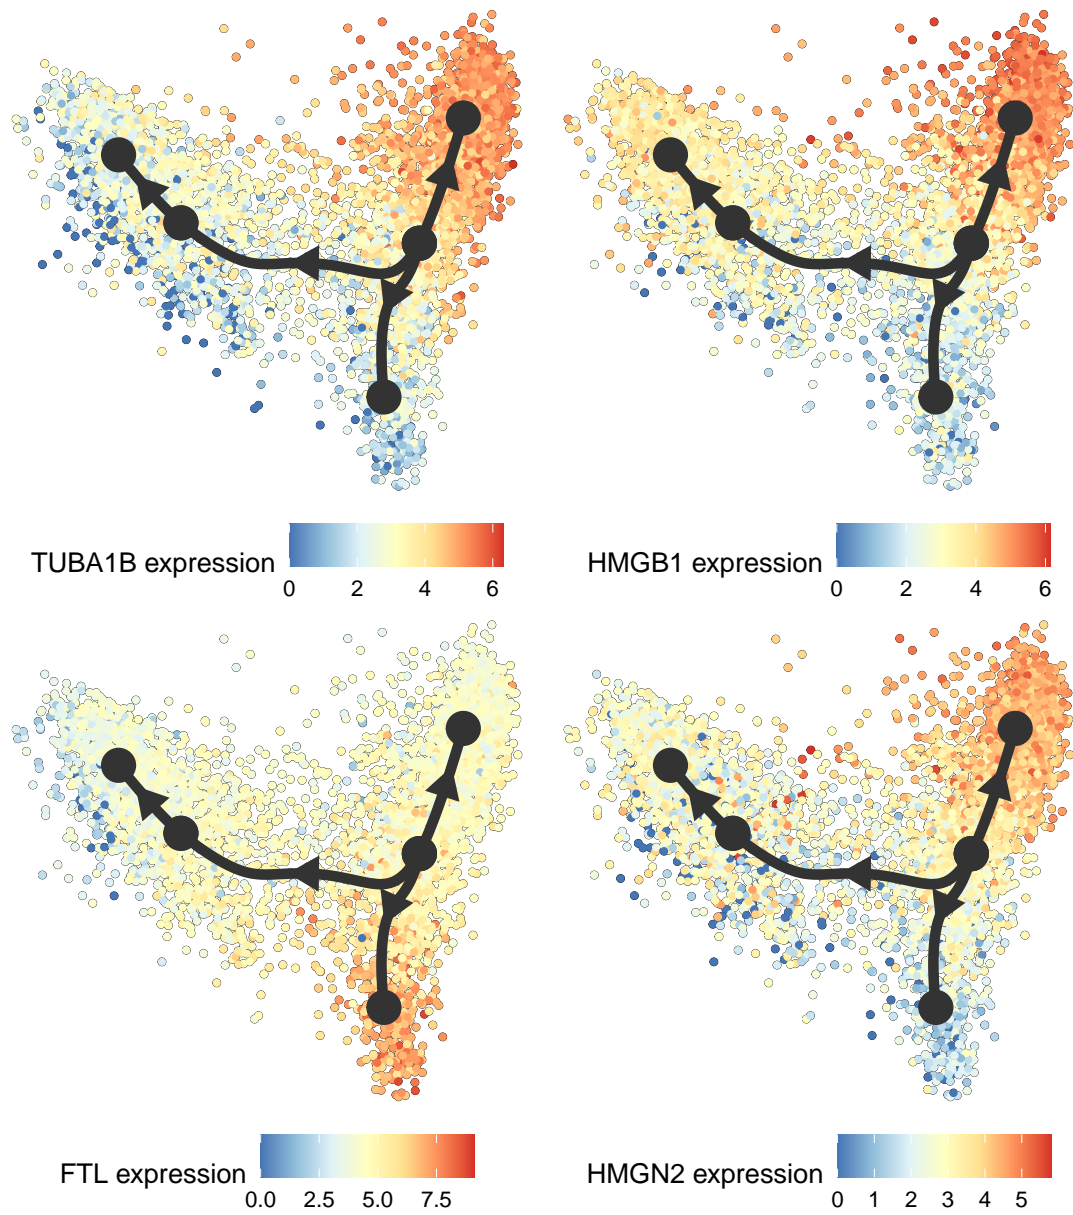

Figure 9: Four first genes with an expression changing at milestone labelled '1' represented on the inferred trajectory.

```

##
## Matrix products: default
## BLAS/LAPACK: /opt/conda/envs/r411/lib/libopenblas-r0.3.15.so
##
## locale:
## [1] LC_CTYPE=C.UTF-8      LC_NUMERIC=C           LC_TIME=C.UTF-8
## [4] LC_COLLATE=C.UTF-8     LC_MONETARY=C.UTF-8   LC_MESSAGES=C.UTF-8
## [7] LC_PAPER=C.UTF-8       LC_NAME=C              LC_ADDRESS=C
## [10] LC_TELEPHONE=C         LC_MEASUREMENT=C.UTF-8 LC_IDENTIFICATION=C
##
## attached base packages:
## [1] stats      graphics  grDevices  utils      datasets  methods    base
##
## other attached packages:
## [1] SeuratObject_4.0.2  Seurat_4.0.5          forcats_0.5.1
## [4] stringr_1.4.0      dplyr_1.0.6           purrr_0.3.4
## [7] readr_1.4.0        tidyr_1.1.3           tibble_3.1.2
## [10] ggplot2_3.3.5      tidyverse_1.3.1       dplyr_1.0.6
## [13] dynwrap_1.2.2      dynplot_1.1.2         dynmethods_1.0.5
## [16] dynguidelines_1.0.1 dynfeature_1.0.0
##
## loaded via a namespace (and not attached):
## [1] utf8_1.2.2          reticulate_1.20       tidyselect_1.1.1
## [4] htmlwidgets_1.5.3  grid_4.1.1           ranger_0.13.1
## [7] Rtsne_0.15         munsell_0.5.0        codetools_0.2-18
## [10] ica_1.0-2          future_1.21.0        miniUI_0.1.1.1
## [13] withr_2.5.0        colorspace_2.0-1     highr_0.9
## [16] knitr_1.35         rstudioapi_0.13      ROCR_1.0-11
## [19] tensor_1.5         listenv_0.8.0        labeling_0.4.2
## [22] polyclip_1.10-0    bit64_4.0.5          farver_2.1.0
## [25] rprojroot_2.0.2    parallelly_1.25.0    vctrs_0.3.8
## [28] generics_0.1.0     xfun_0.28            R6_2.5.1
## [31] GA_3.2.2           graphlayouts_0.8.0   hdf5r_1.3.5
## [34] spatstat.utils_2.1-0 assertthat_0.2.1     promises_1.2.0.1
## [37] scales_1.1.1       gggraph_2.0.5        lmds_0.1.0
## [40] gtable_0.3.0       babelwhale_1.0.3     globals_0.14.0
## [43] processx_3.5.3     goftest_1.2-2        tidygraph_1.2.0
## [46] rlang_1.0.2        splines_4.1.1        lazyeval_0.2.2
## [49] spatstat.geom_2.1-0 broom_0.7.6          yaml_2.3.5
## [52] reshape2_1.4.4     abind_1.4-5          modelr_0.1.8
## [55] backports_1.2.1    httpuv_1.6.1         tools_4.1.1
## [58] ellipsis_0.3.2     spatstat.core_2.1-2  RColorBrewer_1.1-2
## [61] ggridges_0.5.3     Rcpp_1.0.8           plyr_1.8.7
## [64] ps_1.6.0           rpart_4.1-15         deldir_0.2-10
## [67] pbapply_1.4-3      viridis_0.6.2        cowplot_1.1.1
## [70] dynparam_1.0.2     zoo_1.8-9            haven_2.4.1
## [73] ggrepel_0.9.1      cluster_2.1.2        fs_1.5.0
## [76] magrittr_2.0.2     data.table_1.14.0    scattermore_0.7
## [79] carrier_0.1.0      lmtest_0.9-38        reprex_2.0.1
## [82] RANN_2.6.1         fitdistrplus_1.1-5   matrixStats_0.61.0
## [85] hms_1.1.0          patchwork_1.1.1      mime_0.10
## [88] evaluate_0.14      xtable_1.8-4         readxl_1.3.1
## [91] gridExtra_2.3      testthat_3.0.2       compiler_4.1.1
## [94] KernSmooth_2.23-20 crayon_1.5.1         htmltools_0.5.2

```

```

## [97] proxyC_0.2.4          mgcv_1.8-36          later_1.2.0
## [100] RcppParallel_5.1.5    lubridate_1.7.10    DBI_1.1.1
## [103] tweenr_1.0.2          dbplyr_2.1.1        MASS_7.3-54
## [106] Matrix_1.3-4          cli_3.2.0            parallel_4.1.1
## [109] igraph_1.2.6          pkgconfig_2.0.3     plotly_4.9.4
## [112] spatstat.sparse_2.0-0 xml2_1.3.2           foreach_1.5.1
## [115] vipor_0.4.5           dynutils_1.0.9      rvest_1.0.2
## [118] digest_0.6.29         dyndimred_1.0.4     sctransform_0.3.2
## [121] RcppAnnoy_0.0.18     spatstat.data_2.1-0 rmarkdown_2.8
## [124] cellranger_1.1.0     leiden_0.3.8        uwot_0.1.10
## [127] shiny_1.7.1           lifecycle_1.0.0     nlme_3.1-152
## [130] jsonlite_1.8.0        desc_1.3.0           viridisLite_0.4.0
## [133] fansi_1.0.3           pillar_1.6.1         lattice_0.20-44
## [136] fastmap_1.1.0         httr_1.4.2           survival_3.2-11
## [139] waldo_0.2.5           glue_1.6.2           remotes_2.4.2
## [142] png_0.1-7             iterators_1.0.13     bit_4.0.4
## [145] ggforce_0.3.3         stringi_1.7.6        irlba_2.3.3
## [148] future.apply_1.7.0

```

## References

- K, Street, Risso D, Fletcher R, Das D, Ngai J, Yosef N, Purdom E, and Dudoit S. 2018. “Slingshot: Cell Lineage and Pseudotime Inference for Single-Cell Transcriptomics.” *BMC Genomics* 19: 477.
- W, Saelens, Cannoodt R, Todorov H, and Saeys Y. 2019. “A Comparison of Single-Cell Trajectory Inference Methods.” *Nature Biotechnology* 37 (5): 547–54.
