# Supplementary material for: FGF8-mediated gene regulation affects regional identity in human cerebral organoids
Source: eLife. 2024 Nov 1;13:e98096. doi: 10.7554/eLife.98096 (PMC11581432; doi:10.7554/eLife.98096)
Supplement: Figure 1—source data 1. — Raw quantitative RT-PCR data showing telencephalic and pluripotency marker expression in control and WNTi cells on days 7 and 10. [file elife-98096-fig1-data1.xls]

## Sheet: GAPDH+Actin
No.	Name	Take Off	Amplification	media ct		No.	Name	Take Off	Amplification	media ct		fold change	error	CV		2D EXP5 day7 +2D EXP6 day10
B1	NANOG	25.95		26.1		A1	GADPH+actin	23.735		23.7725		0.199229	0.0264056	0.132539			NANOG		PAX6		NR2F1		FOXG1		SIX3		FGF5		OCT4		OTX2		SOX2
B2	NANOG	26.25				A2	GADPH+actin	23.81								HMGU1	0.199229	0.0264056	2.47451e-05	2.29057e-05	1.69014e-05	5.92672e-06	0.000401448	0.000218288	1.30327e-05	4.79079e-07	4.2638e-05	7.0701e-05	2.4158	0.0813902	0.000571682	0.000501184	0.0244758	0.000846143
B3	NANOG	31.03		31.02		A3	GADPH+actin	24.81		24.8325		0.0137207	0.000387778	0.0282622		Day7 CTRL	0.0137207	0.000387778	0.0370984	0.00111718	5.52947e-05	5.61778e-05	0.0261418	0.00264221	0.000485749	1.37284e-05	6.97475e-05	9.22243e-05	0.251303	0.0101382	0.819321	0.0231558	0.0719182	0.00657801
B4	NANOG	31.01				A4	GADPH+actin	24.855								Day7 WNTi	0.0148335	0.00242876	0.0326902	0.00315605	3.38614e-05	2.92225e-05	0.0227183	0.000619966	0.00102867	0.000109071	3.88965e-05	4.00473e-05	0.399149	0.0117381	0.673617	0.0183825	0.098073	0.00267634
B5	NANOG	30.51		30.36		A5	GADPH+actin	24.255		24.285		0.0148335	0.00242876	0.163735		Day10 CTRL	0.00882003	0.000509669	0.075363	0.00544125	0.000135445	7.18072e-06	0.018453	0.000239291	0.000601145	0.000281484	4.1833e-05	4.56235e-05	0.0468762	0.0020421	0.891929	0.0227155	0.0813339	0.0020714
B6	NANOG	30.21				A6	GADPH+actin	24.315								Day10 WNTi	0.00394024	0.00125184	0.031962	0.00235894	0.000159131	4.72817e-06	0.312624	0.00478448	0.00118779	0.000205973	0.000116087	6.13317e-05	0.0298216	0.00371714	0.418268	0.0268667	0.0776161	0.00155693
B7	NANOG	31.11		31.175		A7	GADPH+actin	24.335		24.35		0.00882003	0.000509669	0.0577854
B8	NANOG	31.24				A8	GADPH+actin	24.365									NANOG		PAX6		NR2F1		FOXG1		SIX3		FGF5		OCT4		OTX2		SOX2			error bars
B9	NANOG	32.7		32.385		A9	GADPH+actin	24.38		24.3975		0.00394024	0.00125184	0.317706		HMGU1	1	0.132539	0.000328345	0.000303938	0.106211	0.0372443	0.00128412	0.000698243	0.0109722	0.000403336	0.367292	0.609032	1	0.0336908	0.00064095	0.000561911	0.249567	0.00862769		0.132539	0.000303938	0.0372443	0.000698243	0.000403336	0.609032	0.0336908	0.000561911	0.00862769
B10	NANOG	32.07				A10	GADPH+actin	24.415								Day7 CTRL	0.0688691	0.00194639	0.492263	0.014824	0.34748	0.35303	0.0836205	0.00845172	0.408951	0.0115579	0.600818	0.794438	0.104025	0.00419664	0.918594	0.0259615	0.733312	0.0670726		0.00194639	0.014824	0.35303	0.00845172	0.0115579	0.794438	0.00419664	0.0259615	0.0670726
																Day7 WNTi	0.0744544	0.0121908	0.433769	0.0418779	0.21279	0.183638	0.0726698	0.0019831	0.866037	0.0918268	0.335062	0.344975	0.165225	0.00485888	0.755236	0.0206098	1	0.0272892		0.0121908	0.0418779	0.183638	0.0019831	0.0918268	0.344975	0.00485888	0.0206098	0.0272892
No.	Name	Take Off	Amplification	media ct		No.	Name	Take Off	Amplification	media ct		fold change	error	CV		Day10 CTRL	0.0442708	0.00255821	1	0.0722005	0.851159	0.0451247	0.0590262	0.000765428	0.506102	0.23698	0.360357	0.39301	0.019404	0.00084531	1	0.0254679	0.82932	0.021121		0.00255821	0.0722005	0.0451247	0.000765428	0.23698	0.39301	0.00084531	0.0254679	0.021121
D1	PAX6	40		39.075		A1	GADPH+actin	23.735		23.7725		2.47451e-05	2.29057e-05	0.925666		Day10 WNTi	0.0197774	0.00628342	0.424107	0.0313011	1	0.0297125	1	0.0153043	1	0.173408	1	0.528323	0.0123444	0.00153868	0.468948	0.030122	0.791412	0.0158752		0.00628342	0.0313011	0.0297125	0.0153043	0.173408	0.528323	0.00153868	0.030122	0.0158752
D2	PAX6	38.15				A2	GADPH+actin	23.81
D3	PAX6	29.55		29.585		A3	GADPH+actin	24.81		24.8325		0.0370984	0.00111718	0.030114
D4	PAX6	29.62				A4	GADPH+actin	24.855
D5	PAX6	29.3		29.22		A5	GADPH+actin	24.255		24.285		0.0326902	0.00315605	0.0965442
D6	PAX6	29.14				A6	GADPH+actin	24.315
D7	PAX6	28		28.08		A7	GADPH+actin	24.335		24.35		0.075363	0.00544125	0.0722005
D8	PAX6	28.16				A8	GADPH+actin	24.365
D9	PAX6	29.43		29.365		A9	GADPH+actin	24.38		24.3975		0.031962	0.00235894	0.0738047
D10	PAX6	29.3				A10	GADPH+actin	24.415
No.	Name	Take Off	Amplification	media ct		No.	Name	Take Off	Amplification	media ct		fold change	error	CV
E1	NR2F1	39.25		39.625		A1	GADPH+actin	23.735		23.7725		1.69014e-05	5.92672e-06	0.350665
E2	NR2F1	40				A2	GADPH+actin	23.81
E3	NR2F1	40		38.975		A3	GADPH+actin	24.81		24.8325		5.52947e-05	5.61778e-05	1.01597
E4	NR2F1	37.95				A4	GADPH+actin	24.855
E5	NR2F1	40		39.135		A5	GADPH+actin	24.255		24.285		3.38614e-05	2.92225e-05	0.863003
E6	NR2F1	38.27				A6	GADPH+actin	24.315
E7	NR2F1	37.14		37.2		A7	GADPH+actin	24.335		24.35		0.000135445	7.18072e-06	0.0530156
E8	NR2F1	37.26				A8	GADPH+actin	24.365
E9	NR2F1	36.98		37.015		A9	GADPH+actin	24.38		24.3975		0.000159131	4.72817e-06	0.0297125
E10	NR2F1	37.05				A10	GADPH+actin	24.415
No.	Name	Take Off	Amplification	media ct		No.	Name	Take Off	Amplification	media ct		fold change	error	CV
F1	FOXG1	35.59		35.055		A1	GADPH+actin	23.735		23.7725		0.000401448	0.000218288	0.543751
F2	FOXG1	34.52				A2	GADPH+actin	23.81
F3	FOXG1	30.18		30.09		A3	GADPH+actin	24.81		24.8325		0.0261418	0.00264221	0.101072
F4	FOXG1	30				A4	GADPH+actin	24.855
F5	FOXG1	29.74		29.745		A5	GADPH+actin	24.255		24.285		0.0227183	0.000619966	0.0272892
F6	FOXG1	29.75				A6	GADPH+actin	24.315
F7	FOXG1	30.1		30.11		A7	GADPH+actin	24.335		24.35		0.018453	0.000239291	0.0129676
F8	FOXG1	30.12				A8	GADPH+actin	24.365
F9	FOXG1	26.07		26.075		A9	GADPH+actin	24.38		24.3975		0.312624	0.00478448	0.0153043
F10	FOXG1	26.08				A10	GADPH+actin	24.415
No.	Name	Take Off	Amplification	media ct		No.	Name	Take Off	Amplification	media ct		fold change	error	CV
H1	SIX3	40		40		A1	GADPH+actin	23.735		23.7725		1.30327e-05	4.79079e-07	0.0367597
H2	SIX3	40				A2	GADPH+actin	23.81
H3	SIX3	35.85		35.84		A3	GADPH+actin	24.81		24.8325		0.000485749	1.37284e-05	0.0282622
H4	SIX3	35.83				A4	GADPH+actin	24.855
H5	SIX3	34.09		34.21		A5	GADPH+actin	24.255		24.285		0.00102867	0.000109071	0.106031
H6	SIX3	34.33				A6	GADPH+actin	24.315
H7	SIX3	35.52		35.05		A7	GADPH+actin	24.335		24.35		0.000601145	0.000281484	0.468246
H8	SIX3	34.58				A8	GADPH+actin	24.365
H9	SIX3	33.93		34.115		A9	GADPH+actin	24.38		24.3975		0.00118779	0.000205973	0.173408
H10	SIX3	34.3				A10	GADPH+actin	24.415
No.	Name	Take Off	Amplification	media ct		No.	Name	Take Off	Amplification	media ct		fold change	error	CV			NANOG		PAX6		NR2F1		FOXG1		SIX3		FGF5		OCT4		OTX2		SOX2			error bars
C1	FGF5	36.58		38.29		A1	GADPH+actin	23.735		23.7725		4.2638e-05	7.0701e-05	1.65817		HMGU1	1	0.132539	0.000328345	0.000303938	0.106211	0.0372443	0.00128412	0.000698243	0.0109722	0.000403336	0.367292	0.609032	1	0.0336908	0.00064095	0.000561911	0.249567	0.00862769		0.132539	0.000303938	0.0372443	0.000698243	0.000403336	0.609032	0.0336908	0.000561911	0.00862769
C2	FGF5	40				A2	GADPH+actin	23.81								Day7 CTRL	0.0688691	0.00194639	0.492263	0.014824	0.34748	0.35303	0.0836205	0.00845172	0.408951	0.0115579	0.600818	0.794438	0.104025	0.00419664	0.918594	0.0259615	0.733312	0.0670726		0.00194639	0.014824	0.35303	0.00845172	0.0115579	0.794438	0.00419664	0.0259615	0.0670726
C3	FGF5	37.28		38.64		A3	GADPH+actin	24.81		24.8325		6.97475e-05	9.22243e-05	1.32226		Day7 WNTi	0.0744544	0.0121908	0.433769	0.0418779	0.21279	0.183638	0.0726698	0.0019831	0.866037	0.0918268	0.335062	0.344975	0.165225	0.00485888	0.755236	0.0206098	1	0.0272892		0.0121908	0.0418779	0.183638	0.0019831	0.0918268	0.344975	0.00485888	0.0206098	0.0272892
C4	FGF5	40				A4	GADPH+actin	24.855								Day10 CTRL	0.0442708	0.00255821	1	0.0722005	0.851159	0.0451247	0.0590262	0.000765428	0.506102	0.23698	0.360357	0.39301	0.019404	0.00084531	1	0.0254679	0.82932	0.021121		0.00255821	0.0722005	0.0451247	0.000765428	0.23698	0.39301	0.00084531	0.0254679	0.021121
C5	FGF5	37.87		38.935		A5	GADPH+actin	24.255		24.285		3.88965e-05	4.00473e-05	1.02959		Day10 WNTi	0.0197774	0.00628342	0.424107	0.0313011	1	0.0297125	1	0.0153043	1	0.173408	1	0.528323	0.0123444	0.00153868	0.468948	0.030122	0.791412	0.0158752		0.00628342	0.0313011	0.0297125	0.0153043	0.173408	0.528323	0.00153868	0.030122	0.0158752
C6	FGF5	40				A6	GADPH+actin	24.315
C7	FGF5	40		38.895		A7	GADPH+actin	24.335		24.35		4.1833e-05	4.56235e-05	1.09061			NANOG		OCT4		SOX2		PAX6		NR2F1		FOXG1		SIX3		OTX2					error bars									error bars
C8	FGF5	37.79				A8	GADPH+actin	24.365								HMGU1	1	0.132539	1	0.0336908	0.249567	0.00862769	0.000328345	0.000303938	0.106211	0.0372443	0.00128412	0.000698243	0.0109722	0.000403336	0.00064095	0.000561911				0.132539	0.0336908	0.00862769	0.000303938	0.0372443	0.000698243	0.000403336	0.000561911		0.132539	0.0336908	0.00862769	0.000303938	0.000698243
C9	FGF5	38		37.47		A9	GADPH+actin	24.38		24.3975		0.000116087	6.13317e-05	0.528323		Day7 CTRL	0.0688691	0.00194639	0.104025	0.00419664	0.733312	0.0670726	0.492263	0.014824	0.34748	0.35303	0.0836205	0.00845172	0.408951	0.0115579	0.918594	0.0259615				0.00194639	0.00419664	0.0670726	0.014824	0.35303	0.00845172	0.0115579	0.0259615		0.00194639	0.00419664	0.0670726	0.014824	0.00845172
C10	FGF5	36.94				A10	GADPH+actin	24.415								Day7 WNTi	0.0744544	0.0121908	0.165225	0.00485888	1	0.0272892	0.433769	0.0418779	0.21279	0.183638	0.0726698	0.0019831	0.866037	0.0918268	0.755236	0.0206098				0.0121908	0.00485888	0.0272892	0.0418779	0.183638	0.0019831	0.0918268	0.0206098		0.0121908	0.00485888	0.0272892	0.0418779	0.0019831
																Day10 CTRL	0.0442708	0.00255821	0.019404	0.00084531	0.82932	0.021121	1	0.0722005	0.851159	0.0451247	0.0590262	0.000765428	0.506102	0.23698	1	0.0254679				0.00255821	0.00084531	0.021121	0.0722005	0.0451247	0.000765428	0.23698	0.0254679		0.00255821	0.00084531	0.021121	0.0722005	0.000765428
No.	Name	Take Off	Amplification	media ct		No.	Name	Take Off	Amplification	media ct		fold change	error	CV		Day10 WNTi	0.0197774	0.00628342	0.0123444	0.00153868	0.791412	0.0158752	0.424107	0.0313011	1	0.0297125	1	0.0153043	1	0.173408	0.468948	0.030122				0.00628342	0.00153868	0.0158752	0.0313011	0.0297125	0.0153043	0.173408	0.030122		0.00628342	0.00153868	0.0158752	0.0313011	0.0153043
B1	oct4	22.47		22.5		A1	GADPH+actin	23.735		23.7725		2.4158	0.0813902	0.0336908
B2	oct4	22.53				A2	GADPH+actin	23.81
B3	oct4	26.85		26.825		A3	GADPH+actin	24.81		24.8325		0.251303	0.0101382	0.0403427
B4	oct4	26.8				A4	GADPH+actin	24.855
B5	oct4	25.61		25.61		A5	GADPH+actin	24.255		24.285		0.399149	0.0117381	0.0294077
B6	oct4	25.61				A6	GADPH+actin	24.315
B7	oct4	28.8		28.765		A7	GADPH+actin	24.335		24.35		0.0468762	0.0020421	0.0435636
B8	oct4	28.73				A8	GADPH+actin	24.365
B9	oct4	29.33		29.465		A9	GADPH+actin	24.38		24.3975		0.0298216	0.00371714	0.124646
B10	oct4	29.6				A10	GADPH+actin	24.415
No.	Name	Take Off	Amplification	media ct		No.	Name	Take Off	Amplification	media ct		fold change	error	CV
D1	otx2	35.42		34.545		A1	GADPH+actin	23.735		23.7725		0.000571682	0.000501184	0.876684
D2	otx2	33.67				A2	GADPH+actin	23.81
D3	otx2	25.13		25.12		A3	GADPH+actin	24.81		24.8325		0.819321	0.0231558	0.0282622
D4	otx2	25.11				A4	GADPH+actin	24.855
D5	otx2	24.83		24.855		A5	GADPH+actin	24.255		24.285		0.673617	0.0183825	0.0272892
D6	otx2	24.88				A6	GADPH+actin	24.315
D7	otx2	24.53		24.515		A7	GADPH+actin	24.335		24.35		0.891929	0.0227155	0.0254679
D8	otx2	24.5				A8	GADPH+actin	24.365
D9	otx2	25.71		25.655		A9	GADPH+actin	24.38		24.3975		0.418268	0.0268667	0.0642331
D10	otx2	25.6				A10	GADPH+actin	24.415
No.	Name	Take Off	Amplification	media ct		No.	Name	Take Off	Amplification	media ct		fold change	error	CV
G1	sox2	29.12		29.125		A1	GADPH+actin	23.735		23.7725		0.0244758	0.000846143	0.0345706
G2	sox2	29.13				A2	GADPH+actin	23.81
G3	sox2	28.71		28.63		A3	GADPH+actin	24.81		24.8325		0.0719182	0.00657801	0.0914652
G4	sox2	28.55				A4	GADPH+actin	24.855
G5	sox2	27.61		27.635		A5	GADPH+actin	24.255		24.285		0.098073	0.00267634	0.0272892
G6	sox2	27.66				A6	GADPH+actin	24.315
G7	sox2	27.94		27.97		A7	GADPH+actin	24.335		24.35		0.0813339	0.0020714	0.0254679
G8	sox2	28				A8	GADPH+actin	24.365
G9	sox2	28.09		28.085		A9	GADPH+actin	24.38		24.3975		0.0776161	0.00155693	0.0200594
G10	sox2	28.08				A10	GADPH+actin	24.415
	Experiment: 2021-08-31 2Dexp5exp6 day7-10 GADPH NANOG FGF5 PAX6 NR2F1 FOXG1 EN2 SIX3 Selected Filter: SYBR Green I / HRM Dye (465-510)
	Include	Color	Pos	Name	Cp	Concentration	Standard	Status
	True	255	A1	GAPDH	23.84		0								A1	GADPH	23.84
	True	255	A2	GAPDH	24.05		0								A2	GADPH	24.05
	True	255	A3	GAPDH	24.80		0								A3	GADPH	24.8
	True	255	A4	GAPDH	24.87		0								A4	GADPH	24.87
	True	255	A5	GAPDH	24.33		0								A5	GADPH	24.33
	True	255	A6	GAPDH	24.41		0								A6	GADPH	24.41
	True	255	A7	GAPDH	24.75		0								A7	GADPH	24.75
	True	255	A8	GAPDH	24.80		0								A8	GADPH	24.8
	True	255	A9	GAPDH	24.84		0								A9	GADPH	24.84
	True	255	A10	GAPDH	24.88		0								A10	GADPH	24.88
	True	255	A11	Sample 11	6.42		0
	True	65280	A12	Sample 12			0
	True	255	B1	NANOG	25.95		0
	True	255	B2	NANOG	26.25		0								A1	actin	23.63
	True	255	B3	NANOG	31.03		0								A2	actin	23.57
	True	255	B4	NANOG	31.01		0								A3	actin	24.82
	True	255	B5	NANOG	30.51		0								A4	actin	24.84
	True	255	B6	NANOG	30.21		0								A5	actin	24.18
	True	255	B7	NANOG	31.11		0								A6	actin	24.22
	True	255	B8	NANOG	31.24		0								A7	actin	23.92
	True	255	B9	NANOG	32.7		0								A8	actin	23.93
	True	255	B10	NANOG	32.07		0								A9	actin	23.92
	True	65280	B11	Sample 23			0								A10	actin	23.95
	True	65280	B12	Sample 24			0
	True	255	C1	FGF5	36.58		0
	True	255	C2	FGF5	40.00		0	> - Late Cp call (last five cycles) has higher uncertainty
	True	255	C3	FGF5	37.28		0									GADPH+actin	23.735
	True	255	C4	FGF5	40.00		0	> - Late Cp call (last five cycles) has higher uncertainty								GADPH+actin	23.81
	True	255	C5	FGF5	37.87		0									GADPH+actin	24.81
	True	255	C6	FGF5	40.00		0	> - Late Cp call (last five cycles) has higher uncertainty								GADPH+actin	24.855
	True	255	C7	FGF5	40.00		0	> - Late Cp call (last five cycles) has higher uncertainty								GADPH+actin	24.255
	True	255	C8	FGF5	37.79		0									GADPH+actin	24.315
	True	255	C9	FGF5	38.00		0									GADPH+actin	24.335
	True	255	C10	FGF5	36.94		0									GADPH+actin	24.365
	True	65280	C11	Sample 35			0									GADPH+actin	24.38
	True	65280	C12	Sample 36			0									GADPH+actin	24.415
	True	255	D1	PAX6	40		0	> - Late Cp call (last five cycles) has higher uncertainty
	True	255	D2	PAX6	38.15		0
	True	255	D3	PAX6	29.55		0
	True	255	D4	PAX6	29.62		0
	True	255	D5	PAX6	29.3		0
	True	255	D6	PAX6	29.14		0
	True	255	D7	PAX6	28		0
	True	255	D8	PAX6	28.16		0
	True	255	D9	PAX6	29.43		0
	True	255	D10	PAX6	29.3		0
	True	255	D11	Sample 47	20.42		0
	True	255	D12	Sample 48	15.42		0
	True	255	E1	NR2F1	39.25		0
	True	255	E2	NR2F1	40		0	> - Late Cp call (last five cycles) has higher uncertainty
	True	255	E3	NR2F1	40		0	> - Late Cp call (last five cycles) has higher uncertainty
	True	255	E4	NR2F1	37.95		0
	True	255	E5	NR2F1	40		0	> - Late Cp call (last five cycles) has higher uncertainty
	True	255	E6	NR2F1	38.27		0
	True	255	E7	NR2F1	37.14		0
	True	255	E8	NR2F1	37.26		0
	True	255	E9	NR2F1	36.98		0
	True	255	E10	NR2F1	37.05		0
	True	255	E11	Sample 59	29.02		0
	True	255	E12	Sample 60	15.62		0
	True	255	F1	FOXG1	35.59		0
	True	255	F2	FOXG1	34.52		0
	True	255	F3	FOXG1	30.18		0
	True	255	F4	FOXG1	30		0
	True	255	F5	FOXG1	29.74		0
	True	255	F6	FOXG1	29.75		0
	True	255	F7	FOXG1	30.1		0
	True	255	F8	FOXG1	30.12		0
	True	255	F9	FOXG1	26.07		0
	True	255	F10	FOXG1	26.08		0
	True	255	F11	Sample 71	32.35		0
	True	255	F12	Sample 72	18.16		0
	True	255	G1	EN2	36.41		0
	True	255	G2	EN2	39.44		0
	True	255	G3	EN2	38.20		0
	True	255	G4	EN2	37.90		0
	True	65280	G5	EN2			0
	True	65280	G6	EN2			0
	True	255	G7	EN2	36.56		0
	True	255	G8	EN2	40.00		0	> - Late Cp call (last five cycles) has higher uncertainty
	True	65280	G9	EN2			0
	True	255	G10	EN2	38.67		0
	True	255	G11	Sample 83	28.82		0
	True	65280	G12	Sample 84			0
	True	255	H1	SIX3	40		0	> - Late Cp call (last five cycles) has higher uncertainty
	True	255	H2	SIX3	40		0	> - Late Cp call (last five cycles) has higher uncertainty
	True	255	H3	SIX3	35.85		0
	True	255	H4	SIX3	35.83		0
	True	255	H5	SIX3	34.09		0
	True	255	H6	SIX3	34.33		0
	True	255	H7	SIX3	35.52		0
	True	255	H8	SIX3	34.58		0
	True	255	H9	SIX3	33.93		0
	True	255	H10	SIX3	34.3		0
	True	255	H11	Sample 95	11.12		0
	True	65280	H12	Sample 96			0
	Experiment: 2021-09-07 2Dexp5exp6 day7-10 ACTIN OCT4 RAX OTX2 T SOX17 SOX2 NKX2 Selected Filter: SYBR Green I / HRM Dye (465-510)
	Include	Color	Pos	Name	Cp	Concentration	Standard	Status
	True	16744448	A1	actin	23.63		0
	True	255	A2	actin	23.57		0
	True	3200768	A3	actin	24.82		0
	True	16711935	A4	actin	24.84		0
	True	8421504	A5	actin	24.18		0
	True	1234938	A6	actin	24.22		0
	True	151	A7	actin	23.92		0
	True	16776975	A8	actin	23.93		0
	True	4210688	A9	actin	23.92		0
	True	4227327	A10	actin	23.95		0
	True	16581273	A11	actin			0
	True	2540728	A12	actin			0
	True	16744448	B1	oct4	22.47		0
	True	255	B2	oct4	22.53		0
	True	3200768	B3	oct4	26.85		0
	True	16711935	B4	oct4	26.80		0
	True	8421504	B5	oct4	25.61		0
	True	1234938	B6	oct4	25.61		0
	True	151	B7	oct4	28.80		0
	True	16776975	B8	oct4	28.73		0
	True	4210688	B9	oct4	29.33		0
	True	4227327	B10	oct4	29.60		0
	True	16581273	B11	oct4	5.00		0	< - Early Cp call (first five cycles) has higher uncertainty
	True	2540728	B12	oct4	37.90		0
	True	16744448	C1	rax	40.00		0	> - Late Cp call (last five cycles) has higher uncertainty
	True	255	C2	rax	40.00		0	> - Late Cp call (last five cycles) has higher uncertainty
	True	3200768	C3	rax	37.02		0
	True	16711935	C4	rax	36.08		0
	True	8421504	C5	rax	33.43		0
	True	1234938	C6	rax	33.49		0
	True	151	C7	rax	36.75		0
	True	16776975	C8	rax	36.44		0
	True	4210688	C9	rax	34.22		0
	True	4227327	C10	rax	33.44		0
	True	16581273	C11	rax	8.00		0
	True	2540728	C12	rax	11.33		0
	True	16744448	D1	otx2	35.42		0
	True	255	D2	otx2	33.67		0
	True	3200768	D3	otx2	25.13		0
	True	16711935	D4	otx2	25.11		0
	True	8421504	D5	otx2	24.83		0
	True	1234938	D6	otx2	24.88		0
	True	151	D7	otx2	24.53		0
	True	16776975	D8	otx2	24.50		0
	True	4210688	D9	otx2	25.71		0
	True	4227327	D10	otx2	25.60		0
	True	16581273	D11	otx2	8.08		0
	True	2540728	D12	otx2	5.00		0	< - Early Cp call (first five cycles) has higher uncertainty
	True	16744448	E1	T	33.72		0
	True	255	E2	T	34.15		0
	True	3200768	E3	T	32.91		0
	True	16711935	E4	T	32.52		0
	True	8421504	E5	T	32.72		0
	True	1234938	E6	T	33.44		0
	True	151	E7	T	35.56		0
	True	16776975	E8	T	40.00		0	> - Late Cp call (last five cycles) has higher uncertainty
	True	4210688	E9	T			0
	True	4227327	E10	T	40.00		0	> - Late Cp call (last five cycles) has higher uncertainty
	True	16581273	E11	T	7.00		0
	True	2540728	E12	T			0
	True	16744448	F1	sox17	31.08		0
	True	255	F2	sox17	31.51		0
	True	3200768	F3	sox17	30.26		0
	True	16711935	F4	sox17	30.42		0
	True	8421504	F5	sox17	29.98		0
	True	1234938	F6	sox17	29.96		0
	True	151	F7	sox17	29.57		0
	True	16776975	F8	sox17	29.65		0
	True	4210688	F9	sox17	31.15		0
	True	4227327	F10	sox17	30.79		0
	True	16581273	F11	sox17	7.00		0
	True	2540728	F12	sox17			0
	True	16744448	G1	sox2	29.12		0
	True	255	G2	sox2	29.13		0
	True	3200768	G3	sox2	28.71		0
	True	16711935	G4	sox2	28.55		0
	True	8421504	G5	sox2	27.61		0
	True	1234938	G6	sox2	27.66		0
	True	151	G7	sox2	27.94		0
	True	16776975	G8	sox2	28.00		0
	True	4210688	G9	sox2	28.09		0
	True	4227327	G10	sox2	28.08		0
	True	16581273	G11	sox2	7.00		0
	True	2540728	G12	sox2			0
	True	16744448	H1	nkx2.1	40.00		0	> - Late Cp call (last five cycles) has higher uncertainty
	True	255	H2	nkx2.1	37.94		0
	True	3200768	H3	nkx2.1	35.25		0
	True	16711935	H4	nkx2.1	37.69		0
	True	8421504	H5	nkx2.1	35.95		0
	True	1234938	H6	nkx2.1	35.51		0
	True	151	H7	nkx2.1	34.01		0
	True	16776975	H8	nkx2.1	33.61		0
	True	4210688	H9	nkx2.1	37.49		0
	True	4227327	H10	nkx2.1	34.99		0
	True	16581273	H11	nkx2.1			0
	True	2540728	H12	nkx2.1	24.36		0
[truncated: 2 more columns]
