# Supplementary material for: FGF8-mediated gene regulation affects regional identity in human cerebral organoids
Source: eLife. 2024 Nov 1;13:e98096. doi: 10.7554/eLife.98096 (PMC11581432; doi:10.7554/eLife.98096)
Supplement: Figure 2—source data 1. — Raw data of FGF target gene expression in day 20 and day 30 CTRL, WNTi, and WNTi +FGF8 organoids. [file elife-98096-fig2-data1.xls]

## Sheet: FGF signaling STAT
No.	Name	Take Off	Amplification	media ct		No.	Name	Take Off	Amplification	media ct		fold change	error	CV		2D EXP14bis Davai bis day20 CTRL WNTi WNTi+FGF8 and day30 CTRL WNTi WNTi+FGF8
C1	CTL DAY20 SPRY6	37		37.705		A1	GADPH+actin	25.015		25.0125		0.000246692	0.000170788	0.692311			SPRY4		DUSP6		ETV4		ETV1		ETV5		GAPDHnew
C2	CTL DAY20 SPRY6	38.41				A2	GADPH+actin	25.01				9.2512e-05				day20 CTRL	0.000246692	0.000170788	0.0178863	0.00265217	0.000241615	2.6354e-05	0.20805	0.0359476	0.0193034	0.00371373	0.455335	0.0373939
C3	WNTi DAY20 SPRY6	33.94		34.055		A3	GADPH+actin	22.735		22.7875		0.000423603	4.14071e-05	0.0977497		day20 WNTi	0.000423603	4.14071e-05	0.00376013	0.000266592	0.0084023	0.000549052	0.109956	0.0376411	0.0227972	0.00104668	0.49827	0.0308188
C4	WNTi DAY20 SPRY6	34.17				A4	GADPH+actin	22.84				0.000388446				day20 WNTi+FGF8	0.00170029	0.000247321	0.0160643	0.00110861	0.0253829	0.00392973	0.281265	0.0133122	0.0476956	0.00455852	0.496546	0.0290776
C5	WNTi FGF8 DAY20 SPRY6	32.89		33.005		A5	GADPH+actin	23.69		23.6375		0.00170029	0.000247321	0.145458		day30 CTRL	0.000611653	4.71155e-05	0.0206889	0.000442002	0.00175416	0.000306034	0.0856739	0.00111098	0.0113199	0.000337483	0.311003	0.0633829
C6	WNTi FGF8 DAY20 SPRY6	33.12				A6	GADPH+actin	23.585				0.00134797				day30 WNTi	0.000525144	0.000115445	0.00800435	0.000400566	0.00441002	0.000272766	0.209497	0.0598923	0.0187756	0.000680919	0.488016	0.0166147
C7	CTL DAY30 SPRY6	33.99		34.075		A7	GADPH+actin	23.315		23.33		0.000611653	4.71155e-05	0.0770298		day30 WNTi+FGF8	0.00191957	8.62292e-05	0.0365243	0.00448613	0.0110103	0.00286166	0.372419	0.029376	0.0343154	0.00154148	0.584389	0.012485
C8	CTL DAY30 SPRY6	34.16				A8	GADPH+actin	23.345				0.000555086
C9	WNTi DAY30 SPRY6	34.7		34.485		A9	GADPH+actin	23.805		23.8225		0.000525144	0.000115445	0.219835
C10	WNTi DAY30 SPRY6	34.27				A10	GADPH+actin	23.84				0.000724865
C11	WNTi FGF8 DAY30 SPRY6	33.98		34.03		A11	GADPH+actin	24.955		24.965		0.00191957	8.62292e-05	0.0449211
C12	WNTi FGF8 DAY30 SPRY6	34.08				A12	GADPH+actin	24.975				0.00181603
No.	Name	Take Off	Amplification	media ct		No.	Name	Take Off	Amplification	media ct		fold change	error	CV
D1	CTL DAY20 DUSP6	30.82		30.97		A1	GADPH+actin	25.015		25.0125		0.0178863	0.00265217	0.148279
D2	CTL DAY20 DUSP6	31.12				A2	GADPH+actin	25.01				0.0144779
D3	WNTi DAY20 DUSP6	30.79		30.76		A3	GADPH+actin	22.735		22.7875		0.00376013	0.000266592	0.0708995
D4	WNTi DAY20 DUSP6	30.73				A4	GADPH+actin	22.84				0.00421574
D5	WNTi FGF8 DAY20 DUSP6	29.65		29.57		A5	GADPH+actin	23.69		23.6375		0.0160643	0.00110861	0.0690108
D6	WNTi FGF8 DAY20 DUSP6	29.49				A6	GADPH+actin	23.585				0.0166885
D7	CTL DAY30 DUSP6	28.91		28.9		A7	GADPH+actin	23.315		23.33		0.0206889	0.000442002	0.0213642
D8	CTL DAY30 DUSP6	28.89				A8	GADPH+actin	23.345				0.0214185
D9	WNTi DAY30 DUSP6	30.77		30.73		A9	GADPH+actin	23.805		23.8225		0.00800435	0.000400566	0.0500436
D10	WNTi DAY30 DUSP6	30.69				A10	GADPH+actin	23.84				0.00866851
D11	WNTi FGF8 DAY30 DUSP6	29.73		29.61		A11	GADPH+actin	24.955		24.965		0.0365243	0.00448613	0.122826
D12	WNTi FGF8 DAY30 DUSP6	29.49				A12	GADPH+actin	24.975				0.0437371
No.	Name	Take Off	Amplification	media ct		No.	Name	Take Off	Amplification	media ct		fold change	error	CV
E1	CTL DAY20 ETV4	37.03		37.14		A1	GADPH+actin	25.015		25.0125		0.000241615	2.6354e-05	0.109074
E2	CTL DAY20 ETV4	37.25				A2	GADPH+actin	25.01				0.000206725					SPRY4		DUSP6		ETV4		ETV1		ETV5		GAPDHnew			error bars
E3	WNTi DAY20 ETV4	29.63		29.705		A3	GADPH+actin	22.735		22.7875		0.0084023	0.000549052	0.0653454		day20 CTRL	0.128514	0.0889718	0.48971	0.0726138	0.00951883	0.00103826	0.558644	0.0965244	0.404721	0.0778632	0.779165	0.0639881		0.0889718	0.0726138	0.00103826	0.0965244	0.0778632	0.0639881
E4	WNTi DAY20 ETV4	29.78				A4	GADPH+actin	22.84				0.00814426				day20 WNTi	0.220676	0.021571	0.102949	0.00729902	0.331022	0.0216308	0.295248	0.101072	0.477973	0.0219451	0.852635	0.0527367		0.021571	0.00729902	0.0216308	0.101072	0.0219451	0.0527367
E5	WNTi FGF8 DAY20 ETV4	28.99		29.115		A5	GADPH+actin	23.69		23.6375		0.0253829	0.00392973	0.154818		day20 WNTi+FGF8	0.885768	0.128842	0.439825	0.0303526	1	0.154818	0.755236	0.0357452	1	0.0955752	0.849685	0.0497573		0.128842	0.0303526	0.154818	0.0357452	0.0955752	0.0497573
E6	WNTi FGF8 DAY20 ETV4	29.24				A6	GADPH+actin	23.585				0.0198461				day30 CTRL	0.31864	0.0245448	0.566442	0.0121016	0.0691082	0.0120567	0.230047	0.00298316	0.237336	0.00707578	0.532185	0.10846		0.0245448	0.0121016	0.0120567	0.00298316	0.00707578	0.10846
E7	CTL DAY30 ETV4	32.47		32.3		A7	GADPH+actin	23.315		23.33		0.00175416	0.000306034	0.174461		day30 WNTi	0.273573	0.0601411	0.219151	0.0109671	0.17374	0.0107461	0.562529	0.160819	0.393654	0.0142763	0.835088	0.0284309		0.0601411	0.0109671	0.0107461	0.160819	0.0142763	0.0284309
E8	CTL DAY30 ETV4	32.13				A8	GADPH+actin	23.345				0.002267				day30 WNTi+FGF8	1	0.0449211	1	0.122826	0.433769	0.11274	1	0.0788788	0.719467	0.0323192	1	0.0213642		0.0449211	0.122826	0.11274	0.0788788	0.0323192	0.0213642
E9	WNTi DAY30 ETV4	31.63		31.7		A9	GADPH+actin	23.805		23.8225		0.00441002	0.000272766	0.0618515
E10	WNTi DAY30 ETV4	31.77				A10	GADPH+actin	23.84				0.00410046
E11	WNTi FGF8 DAY30 ETV4	31.46		31.73		A11	GADPH+actin	24.955		24.965		0.0110103	0.00286166	0.259907
E12	WNTi FGF8 DAY30 ETV4	32				A12	GADPH+actin	24.975				0.00767829
No.	Name	Take Off	Amplification	media ct		No.	Name	Take Off	Amplification	media ct		fold change	error	CV
G1	CTL DAY20 ETV1	27.28		27.455		A1	GADPH+actin	25.015		25.0125		0.20805	0.0359476	0.172784
G2	CTL DAY20 ETV1	27.63				A2	GADPH+actin	25.01				0.162668
G3	WNTi DAY20 ETV1	25.92		25.6		A3	GADPH+actin	22.735		22.7875		0.109956	0.0376411	0.342328
G4	WNTi DAY20 ETV1	25.28				A4	GADPH+actin	22.84				0.184284
G5	WNTi FGF8 DAY20 ETV1	25.52		25.51		A5	GADPH+actin	23.69		23.6375		0.281265	0.0133122	0.0473298
G6	WNTi FGF8 DAY20 ETV1	25.5				A6	GADPH+actin	23.585				0.265172
G7	CTL DAY30 ETV1	26.86		26.87		A7	GADPH+actin	23.315		23.33		0.0856739	0.00111098	0.0129676
G8	CTL DAY30 ETV1	26.88				A8	GADPH+actin	23.345				0.0862698
G9	WNTi DAY30 ETV1	26.06		26.36		A9	GADPH+actin	23.805		23.8225		0.209497	0.0598923	0.285886
G10	WNTi DAY30 ETV1	26.66				A10	GADPH+actin	23.84				0.14161
G11	WNTi FGF8 DAY30 ETV1	26.38		26.465		A11	GADPH+actin	24.955		24.965		0.372419	0.029376	0.0788788
G12	WNTi FGF8 DAY30 ETV1	26.55				A12	GADPH+actin	24.975				0.335643
No.	Name	Take Off	Amplification	media ct		No.	Name	Take Off	Amplification	media ct		fold change	error	CV
F1	CTL DAY20 ETV5	30.71		30.905		A1	GADPH+actin	25.015		25.0125		0.0193034	0.00371373	0.192387
F2	CTL DAY20 ETV5	31.1				A2	GADPH+actin	25.01				0.01468
F3	WNTi DAY20 ETV5	28.19		28.205		A3	GADPH+actin	22.735		22.7875		0.0227972	0.00104668	0.0459128
F4	WNTi DAY20 ETV5	28.22				A4	GADPH+actin	22.84				0.0240137
F5	WNTi FGF8 DAY20 ETV5	28.08		28.14		A5	GADPH+actin	23.69		23.6375		0.0476956	0.00455852	0.0955752
F6	WNTi FGF8 DAY20 ETV5	28.2				A6	GADPH+actin	23.585				0.0408081
F7	CTL DAY30 ETV5	29.78		29.815		A7	GADPH+actin	23.315		23.33		0.0113199	0.000337483	0.0298134
F8	CTL DAY30 ETV5	29.85				A8	GADPH+actin	23.345				0.0110103
F9	WNTi DAY30 ETV5	29.54		29.515		A9	GADPH+actin	23.805		23.8225		0.0187756	0.000680919	0.0362662
F10	WNTi DAY30 ETV5	29.49				A10	GADPH+actin	23.84				0.019915
F11	WNTi FGF8 DAY30 ETV5	29.82		29.78		A11	GADPH+actin	24.955		24.965		0.0343154	0.00154148	0.0449211
F12	WNTi FGF8 DAY30 ETV5	29.74				A12	GADPH+actin	24.975				0.0367783
No.	Name	Take Off	Amplification	media ct		No.	Name	Take Off	Amplification	media ct		fold change	error	CV
H1	CTL DAY20 GAPDH	26.15		26.065		A1	GADPH+actin	25.015		25.0125		0.455335	0.0373939	0.082124
H2	CTL DAY20 GAPDH	25.98				A2	GADPH+actin	25.01				0.510506
H3	WNTi DAY20 GAPDH	23.74		23.81		A3	GADPH+actin	22.735		22.7875		0.49827	0.0308188	0.0618515
H4	WNTi DAY20 GAPDH	23.88				A4	GADPH+actin	22.84				0.486327
H5	WNTi FGF8 DAY20 GAPDH	24.7		24.635		A5	GADPH+actin	23.69		23.6375		0.496546	0.0290776	0.0585597
H6	WNTi FGF8 DAY20 GAPDH	24.57				A6	GADPH+actin	23.585				0.505226
H7	CTL DAY30 GAPDH	25		24.8		A7	GADPH+actin	23.315		23.33		0.311003	0.0633829	0.203802
H8	CTL DAY30 GAPDH	24.6				A8	GADPH+actin	23.345				0.418994
H9	WNTi DAY30 GAPDH	24.84		24.88		A9	GADPH+actin	23.805		23.8225		0.488016	0.0166147	0.0340455
H10	WNTi DAY30 GAPDH	24.92				A10	GADPH+actin	23.84				0.473029
H11	WNTi FGF8 DAY30 GAPDH	25.73		25.715		A11	GADPH+actin	24.955		24.965		0.584389	0.012485	0.0213642
H12	WNTi FGF8 DAY30 GAPDH	25.7				A12	GADPH+actin	24.975				0.604997
	Experiment: 2021-12-03 2Dexp14b day20e30 GADPH ACT NR2F1a EN2 SIX3 PAX6 FOXG1 OTX2 Selected Filter: SYBR Green I / HRM Dye (465-510)
	Include	Color	Pos	Name	Cp	Concentration	Standard	Status
	True	255	A1	GADPH	24.14		0		A1	GADPH	24.14
	True	255	A2	GADPH	24.22		0		A2	GADPH	24.22
	True	255	A3	GADPH	22.24		0		A3	GADPH	22.24
	True	255	A4	GADPH	22.25		0		A4	GADPH	22.25
	True	255	A5	GADPH	23.08		0		A5	GADPH	23.08
	True	255	A6	GADPH	22.98		0		A6	GADPH	22.98
	True	255	A7	GADPH	23.07		0		A7	GADPH	23.07
	True	255	A8	GADPH	23.17		0		A8	GADPH	23.17
	True	255	A9	GADPH	23.14		0		A9	GADPH	23.14
	True	255	A10	GADPH	23.12		0		A10	GADPH	23.12
	True	255	A11	GADPH	24.05		0		A11	GADPH	24.05
	True	255	A12	GADPH	24.12		0		A12	GADPH	24.12
	True	255	B1	actin	25.89		0
	True	255	B2	actin	25.8		0		B1	actin	25.89
	True	255	B3	actin	23.23		0		B2	actin	25.8
	True	255	B4	actin	23.43		0		B3	actin	23.23
	True	255	B5	actin	24.3		0		B4	actin	23.43
	True	255	B6	actin	24.19		0		B5	actin	24.3
	True	255	B7	actin	23.56		0		B6	actin	24.19
	True	255	B8	actin	23.52		0		B7	actin	23.56
	True	255	B9	actin	24.47		0		B8	actin	23.52
	True	255	B10	actin	24.56		0		B9	actin	24.47
	True	255	B11	actin	25.86		0		B10	actin	24.56
	True	255	B12	actin	25.83		0		B11	actin	25.86
	True	255	C1	NR2F1a	31.60		0		B12	actin	25.83
	True	255	C2	NR2F1a	31.63		0
	True	255	C3	NR2F1a	30.73		0			GADPH+actin	25.015
	True	255	C4	NR2F1a	30.84		0			GADPH+actin	25.01
	True	255	C5	NR2F1a	33.85		0			GADPH+actin	22.735
	True	255	C6	NR2F1a	33.55		0			GADPH+actin	22.84
	True	255	C7	NR2F1a	31.60		0			GADPH+actin	23.69
	True	255	C8	NR2F1a	31.50		0			GADPH+actin	23.585
	True	255	C9	NR2F1a	31.76		0			GADPH+actin	23.315
	True	255	C10	NR2F1a	31.51		0			GADPH+actin	23.345						SPRY4	DUSP6	ETV4	ETV1	ETV5
	True	255	C11	NR2F1a	34.83		0			GADPH+actin	23.805			day20 Wi versus Wi+FGF8			0.0241659	0.00097147	0.0353746	0.0801515	0.0270062
	True	255	C12	NR2F1a	34.87		0			GADPH+actin	23.84			day30 Wi versus Wi+FGF8			0.00809254	0.012728	0.0932272	0.0437373	0.006941
	True	255	D1	EN2	33.73		0			GADPH+actin	24.955
	True	255	D2	EN2	34.04		0			GADPH+actin	24.975
	True	255	D3	EN2	32.58		0
	True	255	D4	EN2	32.85		0
	True	255	D5	EN2	32.09		0
	True	255	D6	EN2	31.70		0
	True	255	D7	EN2	31.87		0
	True	255	D8	EN2	31.84		0
	True	255	D9	EN2	35.02		0
	True	255	D10	EN2	34.09		0
	True	255	D11	EN2	31.63		0
	True	255	D12	EN2	31.81		0
	True	255	E1	SIX3	30.74		0
	True	255	E2	SIX3	30.67		0
	True	255	E3	SIX3	27.79		0
	True	255	E4	SIX3	27.74		0
	True	255	E5	SIX3	29.65		0
	True	255	E6	SIX3	29.69		0
	True	255	E7	SIX3	28.88		0
	True	255	E8	SIX3	28.83		0
	True	255	E9	SIX3	27.97		0
	True	255	E10	SIX3	27.85		0
	True	255	E11	SIX3	31.29		0
	True	255	E12	SIX3	31.22		0
	True	255	F1	PAX6	26.57		0
	True	255	F2	PAX6	26.67		0
	True	255	F3	PAX6	25.49		0
	True	255	F4	PAX6	25.46		0
	True	255	F5	PAX6	26.92		0
	True	255	F6	PAX6	26.94		0
	True	255	F7	PAX6	25.48		0
	True	255	F8	PAX6	25.52		0
	True	255	F9	PAX6	26.26		0
	True	255	F10	PAX6	26.22		0
	True	255	F11	PAX6	27.62		0
	True	255	F12	PAX6	27.80		0
	True	255	G1	FOXG1	29.61		0
	True	255	G2	FOXG1	29.69		0
	True	255	G3	FOXG1	23.17		0
	True	255	G4	FOXG1	23.21		0
	True	255	G5	FOXG1	24.07		0
	True	255	G6	FOXG1	24.10		0
	True	255	G7	FOXG1	31.52		0
	True	255	G8	FOXG1	31.43		0
	True	255	G9	FOXG1	23.61		0
	True	255	G10	FOXG1	23.65		0
	True	255	G11	FOXG1	25.19		0
	True	255	G12	FOXG1	25.23		0
	True	255	H1	OTX2	25.10		0
	True	255	H2	OTX2	25.08		0
	True	255	H3	OTX2	26.49		0
	True	255	H4	OTX2	26.44		0
	True	255	H5	OTX2	26.23		0
	True	255	H6	OTX2	26.45		0
	True	255	H7	OTX2	23.95		0
	True	255	H8	OTX2	24.09		0
	True	255	H9	OTX2	27.64		0
	True	255	H10	OTX2	27.78		0
	True	255	H11	OTX2	27.54		0
	True	255	H12	OTX2	27.28		0
		Ct
ACTIN	CTL DAY20 Act	34.05
	CTL DAY20 Act	35.26
	WNTi DAY20 Act	31.19
	WNTi DAY20 Act	31.52
	WNTi FGF8 DAY20 Act	32.49
	WNTi FGF8 DAY20 Act	31.88
	CTL DAY30 Act	31.88
	CTL DAY30 Act	32.14
	WNTi DAY30 Act	33.14
	WNTi DAY30 Act	33.58
	WNTi FGF8 DAY30 Act	34.51
	WNTi FGF8 DAY30 Act	32.84
GAPDH	CTL DAY20 GAPDH	26.15
	CTL DAY20 GAPDH	25.98
	WNTi DAY20 GAPDH	23.74
	WNTi DAY20 GAPDH	23.88
	WNTi FGF8 DAY20 GAPDH	24.7
	WNTi FGF8 DAY20 GAPDH	24.57
	CTL DAY30 GAPDH	25
	CTL DAY30 GAPDH	24.6
	WNTi DAY30 GAPDH	24.84
	WNTi DAY30 GAPDH	24.92
	WNTi FGF8 DAY30 GAPDH	25.73
	WNTi FGF8 DAY30 GAPDH	25.7
SPRY4	CTL DAY20 SPRY6	37
	CTL DAY20 SPRY6	38.41
	WNTi DAY20 SPRY6	33.94
	WNTi DAY20 SPRY6	34.17
	WNTi FGF8 DAY20 SPRY6	32.89
	WNTi FGF8 DAY20 SPRY6	33.12
	CTL DAY30 SPRY6	33.99
	CTL DAY30 SPRY6	34.16
	WNTi DAY30 SPRY6	34.7
	WNTi DAY30 SPRY6	34.27
	WNTi FGF8 DAY30 SPRY6	33.98
	WNTi FGF8 DAY30 SPRY6	34.08
DUSP6	CTL DAY20 DUSP6	30.82
	CTL DAY20 DUSP6	31.12
	WNTi DAY20 DUSP6	30.79
	WNTi DAY20 DUSP6	30.73
	WNTi FGF8 DAY20 DUSP6	29.65
	WNTi FGF8 DAY20 DUSP6	29.49
	CTL DAY30 DUSP6	28.91
	CTL DAY30 DUSP6	28.89
	WNTi DAY30 DUSP6	30.77
	WNTi DAY30 DUSP6	30.69
	WNTi FGF8 DAY30 DUSP6	29.73
	WNTi FGF8 DAY30 DUSP6	29.49
ETV4	CTL DAY20 ETV4	37.03
	CTL DAY20 ETV4	37.25
	WNTi DAY20 ETV4	29.63
	WNTi DAY20 ETV4	29.78
	WNTi FGF8 DAY20 ETV4	28.99
	WNTi FGF8 DAY20 ETV4	29.24
	CTL DAY30 ETV4	32.47
	CTL DAY30 ETV4	32.13
	WNTi DAY30 ETV4	31.63
	WNTi DAY30 ETV4	31.77
	WNTi FGF8 DAY30 ETV4	31.46
	WNTi FGF8 DAY30 ETV4	32
ETV1	CTL DAY20 ETV1	27.28
	CTL DAY20 ETV1	27.63
	WNTi DAY20 ETV1	25.92
	WNTi DAY20 ETV1	25.28
	WNTi FGF8 DAY20 ETV1	25.52
	WNTi FGF8 DAY20 ETV1	25.5
	CTL DAY30 ETV1	26.86
	CTL DAY30 ETV1	26.88
	WNTi DAY30 ETV1	26.06
	WNTi DAY30 ETV1	26.66
	WNTi FGF8 DAY30 ETV1	26.38
	WNTi FGF8 DAY30 ETV1	26.55
ETV5	CTL DAY20 ETV5	30.71
	CTL DAY20 ETV5	31.1
	WNTi DAY20 ETV5	28.19
	WNTi DAY20 ETV5	28.22
	WNTi FGF8 DAY20 ETV5	28.08
	WNTi FGF8 DAY20 ETV5	28.2
	CTL DAY30 ETV5	29.78
	CTL DAY30 ETV5	29.85
	WNTi DAY30 ETV5	29.54
	WNTi DAY30 ETV5	29.49
	WNTi FGF8 DAY30 ETV5	29.82
	WNTi FGF8 DAY30 ETV5	29.74
NR2F1	CTL DAY20 NR2F1	40
	CTL DAY20 NR2F1	40
	WNTi DAY20 NR2F1	40
	WNTi DAY20 NR2F1	40
	WNTi FGF8 DAY20 NR2F1	40
	WNTi FGF8 DAY20 NR2F1	40
	CTL DAY30 NR2F1	40
	CTL DAY30 NR2F1	40
	WNTi DAY30 NR2F1	40
	WNTi DAY30 NR2F1	40
	WNTi FGF8 DAY30 NR2F1
	WNTi FGF8 DAY30 NR2F1
