# Supplementary material for: FGF8-mediated gene regulation affects regional identity in human cerebral organoids
Source: eLife. 2024 Nov 1;13:e98096. doi: 10.7554/eLife.98096 (PMC11581432; doi:10.7554/eLife.98096)
Supplement: Figure 3—figure supplement 2—source data 1. — Summary datasheet showing the number of FOXG1+ cells in each cluster, extracted via 10 X Genomics Loupe Browser. [file elife-98096-fig3-figsupp2-data1.xlsx]

## Sheet: CellNumber FOXG1 and NR2F1 bars
		Total cells						A	Total cells			%			B	Total cells			%			TOTAL	FOXG1	%		error bars				A	Total cells			%			B	Total cells			%			TOTAL	NR2F1	%		error bars
	n° cells	All	WNTia	FGF8a	WNTib	FGF8b		FOXG1	All	WNTia	FGF8a	WNTi	FGF8		FOXG1	All	WNTib	FGF8b	WNTi	FGF8		FOXG1	All	WNTi	FGF8	WNTi	FGF8			NR2F1	All	WNTia	FGF8a	WNTi	FGF8		NR2F1	All	WNTi	FGF8	WNTi	FGF8		FOXG1	All	WNTi	FGF8	WNTi	FGF8
	Cluster 1	2148	1047	100	950	51		Cluster 1		978	70	93.4097	70		Cluster 1		887	39	93.3684	76.4706		Cluster 1		93.3901	72.1854	0.0206605	3.23529			Cluster 1		797	10	76.1223	10		Cluster 1		638	9	67.1579	17.6471		Cluster 1		71.8578	12.5828	4.48218	3.82353
	Cluster 2	1476	568	223	544	141		Cluster 2		489	173	86.0915	77.5785		Cluster 2		469	120	86.2132	85.1064		Cluster 2		86.1511	80.4945	0.060843	3.76395			Cluster 2		518	36	91.1972	16.1435		Cluster 2		488	27	89.7059	19.1489		Cluster 2		90.4676	17.3077	0.74565	1.50272
	Cluster 3	1434	525	226	581	102		Cluster 3		416	139	79.2381	61.5044		Cluster 3		474	71	81.5835	69.6078		Cluster 3		80.4702	64.0244	1.17269	4.05171			Cluster 3		423	31	80.5714	13.7168		Cluster 3		424	26	72.9776	25.4902		Cluster 3		76.5823	17.378	3.7969	5.88669
	Cluster 4	1339	528	181	494	136		Cluster 4		489	131	92.6136	72.3757		Cluster 4		463	103	93.7247	75.7353		Cluster 4		93.1507	73.817	0.55553	1.6798			Cluster 4		451	22	85.4167	12.1547		Cluster 4		414	26	83.8057	19.1176		Cluster 4		84.638	15.142	0.805499	3.48148
	Cluster 5	1328	363	378	374	213		Cluster 5		277	292	76.3085	77.2487		Cluster 5		306	163	81.8182	76.5258		Cluster 5		79.1045	76.9882	2.75482	0.361428			Cluster 5		296	45	81.5427	11.9048		Cluster 5		303	47	81.016	22.0657		Cluster 5		81.2754	15.5668	0.263328	5.08048
	Cluster 6	1321	279	478	266	298		Cluster 6		180	349	64.5161	73.0126		Cluster 6		177	223	66.5414	74.8322		Cluster 6		65.5046	73.7113	1.01261	0.909831			Cluster 6		209	36	74.9104	7.53138		Cluster 6		212	41	79.6992	13.7584		Cluster 6		77.2477	9.92268	2.39443	3.1135
	Cluster 7	1289	149	606	147	387		Cluster 7		95	361	63.7584	59.571		Cluster 7		94	263	63.9456	67.9587		Cluster 7		63.8514	62.8399	0.0935945	4.19385			Cluster 7		128	107	85.906	17.6568		Cluster 7		126	92	85.7143	23.7726		Cluster 7		85.8108	20.0403	0.0958773	3.05792
	Cluster 8	1265	24	615	10	616		Cluster 8		9	240	37.5	39.0244		Cluster 8		2	322	20	52.2727		Cluster 8		32.3529	45.6539	8.75	6.62417			Cluster 8		23	412	95.8333	66.9919		Cluster 8		6	408	60	66.2338		Cluster 8		85.2941	66.6125	17.9167	0.379052
	Cluster 9	1251	10	534	11	696		Cluster 9		4	255	40	47.7528		Cluster 9		5	405	45.4545	58.1897		Cluster 9		42.8571	53.6585	2.72727	5.21842			Cluster 9		10	363	100	67.9775		Cluster 9		11	480	100	68.9655		Cluster 9		100	68.5366	0	0.493995
	Cluster 10	1163	116	584	159	304		Cluster 10		25	111	21.5517	19.0068		Cluster 10		54	73	33.9623	24.0132		Cluster 10		28.7273	20.7207	6.20527	2.50315			Cluster 10		31	41	26.7241	7.02055		Cluster 10		62	21	38.9937	6.90789		Cluster 10		33.8182	6.98198	6.13479	0.0563266
	Cluster 11	1020	289	287	314	130		Cluster 11		145	91	50.173	31.7073		Cluster 11		178	57	56.6879	43.8462		Cluster 11		53.5655	35.4916	3.25744	6.06942			Cluster 11		186	28	64.3599	9.7561		Cluster 11		172	14	54.7771	10.7692		Cluster 11		59.3698	10.0719	4.7914	0.506567
	Cluster 12	944	313	167	335	129		Cluster 12		268	118	85.623	70.6587		Cluster 12		288	118	85.9701	91.4729		Cluster 12		85.8025	79.7297	0.173573	10.4071			Cluster 12		296	16	94.5687	9.58084		Cluster 12		316	13	94.3284	10.0775		Cluster 12		94.4444	9.7973	0.120166	0.248341
	Cluster 13	939	265	240	296	138		Cluster 13		117	107	44.1509	44.5833		Cluster 13		158	67	53.3784	48.5507		Cluster 13		49.0196	46.0317	4.61372	1.9837			Cluster 13		181	69	68.3019	28.75		Cluster 13		176	39	59.4595	28.2609		Cluster 13		63.6364	28.5714	4.42121	0.244565
	Cluster 14	861	291	151	277	142		Cluster 14		262	115	90.0344	76.1589		Cluster 14		239	121	86.2816	85.2113		Cluster 14		88.2042	80.5461	1.87639	4.52616			Cluster 14		276	8	94.8454	5.29801		Cluster 14		259	29	93.5018	20.4225		Cluster 14		94.1901	12.628	0.671778	7.56226
	Cluster 15	812	273	176	222	141		Cluster 15		228	134	83.5165	76.1364		Cluster 15		189	117	85.1351	82.9787		Cluster 15		84.2424	79.1798	0.809326	3.42118			Cluster 15		254	29	93.0403	16.4773		Cluster 15		209	34	94.1441	24.1135		Cluster 15		93.5354	19.8738	0.551926	3.8181
		18590	5040	4946	4980	3624		TOTAL	0	3982	2686	79.0079	54.3065		TOTAL	0	3983	2262	79.9799	62.4172		TOTAL	0	79.491	57.7363	0.485992	4.05535			TOTAL	0	4079	1253	80.9325	25.3336		TOTAL	0	3816	1306	76.6265	36.0375		TOTAL	0	78.7924	29.86	2.15302	5.35196
								in	Cluster X						in	Cluster X														in	Cluster X						in	Cluster X
								FOXG1	>	0					FOXG1	>	0													NR2F1	>	0					NR2F1	>	0
								in	FGF8 or CTL						in	FGF8 or CTL														in	FGF8 or CTL						in	FGF8 or CTL
