# Supplementary material for: FGF8-mediated gene regulation affects regional identity in human cerebral organoids
Source: eLife. 2024 Nov 1;13:e98096. doi: 10.7554/eLife.98096 (PMC11581432; doi:10.7554/eLife.98096)
Supplement: Figure 3—figure supplement 2—source data 3. — Summary datasheet of cells from clusters 8 and 9 expressing different positional identity markers, extracted via 10 X Genomics Loupe Browser. [file elife-98096-fig3-figsupp2-data3.xlsx]

## Sheet: Clusters 8-9
		Total cells					Total cells			%			clusters 8-9	%
	n° cells	All	WNTi	FGF8		FOXG1	All	WNTi	FGF8	WNTi	FGF8			WNTi	FGF8
	Cluster 8	1262	31	1231		Cluster 8		11	562	35.4839	45.6539		FOXG1	38.4615	49.6546
	Cluster 9	1251	21	1230		Cluster 9		9	660	42.8571	53.6585		SFRP1	57.6923	70.8249
		2513	52	2461		TOTAL	0	20	1222	38.4615	49.6546		GAS1	48.0769	30.6786
													FZD8	19.2308	22.1048
							Total cells			%			SFRP2	55.7692	70.0935
						SFRP1	All	WNTi	FGF8	WNTi	FGF8		NKX2-1	1.92308	0.284437
						Cluster 8		15	814	48.3871	66.1251		OLIG2	9.61538	4.30719
						Cluster 9		15	929	71.4286	75.5285		LHX8	0	0.0406339
						TOTAL	0	30	1743	57.6923	70.8249		GBX2	3.84615	7.6798
													SIX3	44.2308	43.0313
							Total cells			%			OTX2	50	31.9789
						GAS1	All	WNTi	FGF8	WNTi	FGF8		FOXP2	13.4615	9.4677
						Cluster 8		17	355	54.8387	28.8383		ISL1	0	1.09711
						Cluster 9		8	400	38.0952	32.5203		LEF1	46.1538	29.3783
						TOTAL	0	25	755	48.0769	30.6786		IRX3	11.5385	19.1792
													IRX2	19.2308	28.9313
							Total cells			%			DBX1	1.92308	0.203169
						FZD8	All	WNTi	FGF8	WNTi	FGF8		EN1	0	2.19423
						Cluster 8		5	231	16.129	18.7652		EN2	1.92308	11.3775
						Cluster 9		5	313	23.8095	25.4472		PAX5	0	1.21902
						TOTAL	0	10	544	19.2308	22.1048		LMX1A	13.4615	0.284437
													FOXA2	1.92308	0
							Total cells			%			HOXA2	0	2.23486
						SFRP2	All	WNTi	FGF8	WNTi	FGF8
						Cluster 8		15	770	48.3871	62.5508
						Cluster 9		14	955	66.6667	77.6423
						TOTAL	0	29	1725	55.7692	70.0935
							Total cells			%
						NKX2-1	All	WNTi	FGF8	WNTi	FGF8
						Cluster 8		1	2	3.22581	0.16247
						Cluster 9		0	5	0	0.406504
						TOTAL	0	1	7	1.92308	0.284437
							Total cells			%
						OLIG2	All	WNTi	FGF8	WNTi	FGF8
						Cluster 8		1	49	3.22581	3.9805
						Cluster 9		4	57	19.0476	4.63415
						TOTAL	0	5	106	9.61538	4.30719
							Total cells			%
						LHX8	All	WNTi	FGF8	WNTi	FGF8
						Cluster 8		0	1	0	0.0812348
						Cluster 9		0	0	0	0
						TOTAL	0	0	1	0	0.0406339
							Total cells			%
						GBX2	All	WNTi	FGF8	WNTi	FGF8
						Cluster 8		1	76	3.22581	6.17384
						Cluster 9		1	113	4.7619	9.18699
						TOTAL	0	2	189	3.84615	7.6798
							Total cells			%
						SIX3	All	WNTi	FGF8	WNTi	FGF8
						Cluster 8		13	473	41.9355	38.424
						Cluster 9		10	586	47.619	47.6423
						TOTAL	0	23	1059	44.2308	43.0313
							Total cells			%
						OTX2	All	WNTi	FGF8	WNTi	FGF8
						Cluster 8		19	353	61.2903	28.6759
						Cluster 9		7	434	33.3333	35.2846
						TOTAL	0	26	787	50	31.9789
							Total cells			%
						FOXP2	All	WNTi	FGF8	WNTi	FGF8
						Cluster 8		3	109	9.67742	8.85459
						Cluster 9		4	124	19.0476	10.0813
						TOTAL	0	7	233	13.4615	9.4677
							Total cells			%
						ISL1	All	WNTi	FGF8	WNTi	FGF8
						Cluster 8		0	19	0	1.54346
						Cluster 9		0	8	0	0.650407
						TOTAL	0	0	27	0	1.09711
							Total cells			%
						LEF1	All	WNTi	FGF8	WNTi	FGF8
						Cluster 8		11	269	35.4839	21.8522
						Cluster 9		13	454	61.9048	36.9106
						TOTAL	0	24	723	46.1538	29.3783
							Total cells			%
						IRX3	All	WNTi	FGF8	WNTi	FGF8
						Cluster 8		4	209	12.9032	16.9781
						Cluster 9		2	263	9.52381	21.3821
						TOTAL	0	6	472	11.5385	19.1792
							Total cells			%
						IRX2	All	WNTi	FGF8	WNTi	FGF8
						Cluster 8		9	323	29.0323	26.2388
						Cluster 9		1	389	4.7619	31.626
						TOTAL	0	10	712	19.2308	28.9313
							Total cells			%
						DBX1	All	WNTi	FGF8	WNTi	FGF8
						Cluster 8		1	3	3.22581	0.243704
						Cluster 9		0	2	0	0.162602
						TOTAL	0	1	5	1.92308	0.203169
							Total cells			%
						EN1	All	WNTi	FGF8	WNTi	FGF8
						Cluster 8		0	40	0	3.24939
						Cluster 9		0	14	0	1.13821
						TOTAL	0	0	54	0	2.19423
							Total cells			%
						EN2	All	WNTi	FGF8	WNTi	FGF8
						Cluster 8		1	88	3.22581	7.14866
						Cluster 9		0	192	0	15.6098
						TOTAL	0	1	280	1.92308	11.3775
							Total cells			%
						PAX5	All	WNTi	FGF8	WNTi	FGF8
						Cluster 8		0	8	0	0.649878
						Cluster 9		0	22	0	1.78862
						TOTAL	0	0	30	0	1.21902
							Total cells			%
						LMX1A	All	WNTi	FGF8	WNTi	FGF8
						Cluster 8		7	5	22.5806	0.406174
						Cluster 9		0	2	0	0.162602
						TOTAL	0	7	7	13.4615	0.284437
							Total cells			%
						FOXA2	All	WNTi	FGF8	WNTi	FGF8
						Cluster 8		1	0	3.22581	0
						Cluster 9		0	0	0	0
						TOTAL	0	1	0	1.92308	0
							Total cells			%
						HOXA2	All	WNTi	FGF8	WNTi	FGF8
						Cluster 8		0	21	0	1.70593
						Cluster 9		0	34	0	2.76423
						TOTAL	0	0	55	0	2.23486

## Sheet: Clusters 8-9 FGF8 only
		Total cells					Total cells			%			clusters 8-9	%
	n° cells	FGF8 tot	FGF8a	FGF8b		FOXG1	All	FGF8a	FGF8b	FGF8a	FGF8b			FGF8	error bar
	Cluster 8	1231	615	616		Cluster 8		240	322	39.0244	52.2727		FOXG1	49.6546	6.16532
	Cluster 9	1230	534	696		Cluster 9		255	405	47.7528	58.1897		SFRP1	70.8249	4.30803
		2461	1149	1312		TOTAL	0	495	727	43.0809	55.4116		GAS1	30.6786	0.367068
													FZD8	22.1048	4.16166
							Total cells			%			SFRP2	70.0935	4.60156
						SFRP1	All	FGF8a	FGF8b	FGF8a	FGF8b		NKX2-1	0.284437	0.141361
						Cluster 8		387	427	62.9268	69.3182		OLIG2	4.30719	0.123285
						Cluster 9		374	555	70.0375	79.7414		LHX8	0.0812678	0.00540634
						TOTAL	0	761	982	66.2315	74.8476		GBX2	7.6798	2.75561
													SIX3	43.0313	6.89163
							Total cells			%			OTX2	31.9789	7.38202
						GAS1	All	FGF8a	FGF8b	FGF8a	FGF8b		FOXP2	9.4677	1.12512
						Cluster 8		171	184	27.8049	29.8701		ISL1	1.09711	0.212705
						Cluster 9		177	223	33.1461	32.0402		LEF1	30.4754	5.4822
						TOTAL	0	348	407	30.2872	31.0213		IRX3	19.1792	2.09216
													IRX2	29.0126	4.70534
							Total cells			%			DBX1	0.203169	0.190549
						FZD8	All	FGF8a	FGF8b	FGF8a	FGF8b		EN1	2.19423	1.61524
						Cluster 8		104	127	16.9106	20.6169		EN2	11.3775	2.38941
						Cluster 9		99	214	18.5393	30.7471		PAX5	1.21902	0.407599
						TOTAL	0	203	341	17.6675	25.9909		LMX1A	0.284437	0.0597351
													FOXA2	0	0
							Total cells			%			HOXA2	2.23486	1.60628
						SFRP2	All	FGF8a	FGF8b	FGF8a	FGF8b
						Cluster 8		352	418	57.2358	67.8571
						Cluster 9		397	558	74.3446	80.1724
						TOTAL	0	749	976	65.1871	74.3902
							Total cells			%
						NKX2-1	All	FGF8a	FGF8b	FGF8a	FGF8b
						Cluster 8		2	0	0.325203	0
						Cluster 9		3	2	0.561798	0.287356
						TOTAL	0	5	2	0.435161	0.152439
							Total cells			%
						OLIG2	All	FGF8a	FGF8b	FGF8a	FGF8b
						Cluster 8		25	24	4.06504	3.8961
						Cluster 9		26	31	4.86891	4.45402
						TOTAL	0	51	55	4.43864	4.19207
							Total cells			%
						LHX8	All	FGF8a	FGF8b	FGF8a	FGF8b
						Cluster 8		0	1	0	0.162338
						Cluster 9		1	0	0.187266	0
						TOTAL	0	1	1	0.0870322	0.0762195
							Total cells			%
						GBX2	All	FGF8a	FGF8b	FGF8a	FGF8b
						Cluster 8		54	22	8.78049	3.57143
						Cluster 9		68	45	12.7341	6.46552
						TOTAL	0	122	67	10.6179	5.10671
							Total cells			%
						SIX3	All	FGF8a	FGF8b	FGF8a	FGF8b
						Cluster 8		197	276	32.0325	44.8052
						Cluster 9		213	373	39.8876	53.592
						TOTAL	0	410	649	35.6832	49.4665
							Total cells			%
						OTX2	All	FGF8a	FGF8b	FGF8a	FGF8b
						Cluster 8		135	218	21.9512	35.3896
						Cluster 9		142	292	26.5918	41.954
						TOTAL	0	277	510	24.1079	38.872
							Total cells			%
						FOXP2	All	FGF8a	FGF8b	FGF8a	FGF8b
						Cluster 8		50	59	8.13008	9.57792
						Cluster 9		45	79	8.42697	11.3506
						TOTAL	0	95	138	8.26806	10.5183
							Total cells			%
						ISL1	All	FGF8a	FGF8b	FGF8a	FGF8b
						Cluster 8		6	13	0.97561	2.11039
						Cluster 9		4	4	0.749064	0.574713
						TOTAL	0	10	17	0.870322	1.29573
							Total cells			%
						LEF1	All	FGF8a	FGF8b	FGF8a	FGF8b
						Cluster 8		123	173	20	28.0844
						Cluster 9		160	294	29.9625	42.2414
						TOTAL	0	283	467	24.6301	35.5945
							Total cells			%
						IRX3	All	FGF8a	FGF8b	FGF8a	FGF8b
						Cluster 8		125	84	20.3252	13.6364
						Cluster 9		121	142	22.6592	20.4023
						TOTAL	0	246	226	21.4099	17.2256
							Total cells			%
						IRX2	All	FGF8a	FGF8b	FGF8a	FGF8b
						Cluster 8		195	130	31.7073	21.1039
						Cluster 9		196	193	36.7041	27.7299
						TOTAL	0	391	323	34.0296	24.6189
							Total cells			%
						DBX1	All	FGF8a	FGF8b	FGF8a	FGF8b
						Cluster 8		0	3	0	0.487013
						Cluster 9		0	2	0	0.287356
						TOTAL	0	0	5	0	0.381098
							Total cells			%
						EN1	All	FGF8a	FGF8b	FGF8a	FGF8b
						Cluster 8		35	5	5.69106	0.811688
						Cluster 9		10	4	1.87266	0.574713
						TOTAL	0	45	9	3.91645	0.685976
							Total cells			%
						EN2	All	FGF8a	FGF8b	FGF8a	FGF8b
						Cluster 8		60	28	9.7561	4.54545
						Cluster 9		100	92	18.7266	13.2184
						TOTAL	0	160	120	13.9252	9.14634
							Total cells			%
						PAX5	All	FGF8a	FGF8b	FGF8a	FGF8b
						Cluster 8		6	2	0.97561	0.324675
						Cluster 9		13	9	2.43446	1.2931
						TOTAL	0	19	11	1.65361	0.838415
							Total cells			%
						LMX1A	All	FGF8a	FGF8b	FGF8a	FGF8b
						Cluster 8		2	3	0.325203	0.487013
						Cluster 9		2	0	0.374532	0
						TOTAL	0	4	3	0.348129	0.228659
							Total cells			%
						FOXA2	All	FGF8a	FGF8b	FGF8a	FGF8b
						Cluster 8		0	0	0	0
						Cluster 9		0	0	0	0
						TOTAL	0	0	0	0	0
							Total cells			%
						HOXA2	All	FGF8a	FGF8b	FGF8a	FGF8b
						Cluster 8		4	17	0.650407	2.75974
						Cluster 9		2	32	0.374532	4.5977
						TOTAL	0	6	49	0.522193	3.73476
