# Supplementary material for: FGF8-mediated gene regulation affects regional identity in human cerebral organoids
Source: eLife. 2024 Nov 1;13:e98096. doi: 10.7554/eLife.98096 (PMC11581432; doi:10.7554/eLife.98096)
Supplement: Figure 3—source data 2. — Summary datasheet showing WNTi or WNTi + FGF8 cell counts per cluster, extracted via 10 X Genomics Loupe Browser. [file elife-98096-fig3-data2.xlsx]

## Sheet: CellNumber FOXG1 and NR2F1
		Total cells					Total cells			%						Total cells			%
	n° cells	All	WNTi	FGF8		FOXG1	All	WNTi	FGF8	WNTi	FGF8				NR2F1	All	WNTi	FGF8	WNTi	FGF8
	Cluster 1	2148	1997	151		Cluster 1		1865	109	93.3901	72.1854				Cluster 1		1435	19	71.8578	12.5828
	Cluster 2	1476	1112	364		Cluster 2		958	293	86.1511	80.4945				Cluster 2		1006	63	90.4676	17.3077
	Cluster 3	1434	1106	328		Cluster 3		890	210	80.4702	64.0244				Cluster 3		847	57	76.5823	17.378
	Cluster 4	1339	1022	317		Cluster 4		952	234	93.1507	73.817				Cluster 4		865	48	84.638	15.142
	Cluster 5	1328	737	591		Cluster 5		583	455	79.1045	76.9882				Cluster 5		599	92	81.2754	15.5668
	Cluster 6	1321	545	776		Cluster 6		357	572	65.5046	73.7113				Cluster 6		421	77	77.2477	9.92268
	Cluster 7	1289	296	993		Cluster 7		189	624	63.8514	62.8399				Cluster 7		254	199	85.8108	20.0403
	Cluster 8	1262	31	1231		Cluster 8		11	562	35.4839	45.6539				Cluster 8		29	820	93.5484	66.6125
	Cluster 9	1251	21	1230		Cluster 9		9	660	42.8571	53.6585				Cluster 9		21	843	100	68.5366
	Cluster 10	1163	275	888		Cluster 10		79	184	28.7273	20.7207				Cluster 10		93	62	33.8182	6.98198
	Cluster 11	1020	603	417		Cluster 11		323	148	53.5655	35.4916				Cluster 11		358	42	59.3698	10.0719
	Cluster 12	944	648	296		Cluster 12		556	236	85.8025	79.7297				Cluster 12		612	29	94.4444	9.7973
	Cluster 13	939	561	378		Cluster 13		275	174	49.0196	46.0317				Cluster 13		357	108	63.6364	28.5714
	Cluster 14	861	568	293		Cluster 14		501	236	88.2042	80.5461				Cluster 14		535	37	94.1901	12.628
	Cluster 15	812	495	317		Cluster 15		417	251	84.2424	79.1798				Cluster 15		462	63	93.3333	19.8738
		18587	10017	8570		TOTAL	0	7965	4948	79.5148	57.7363				TOTAL	0	7894	2559	78.806	29.86
						in	Cluster X								in	Cluster X
						FOXG1	>	0							NR2F1	>	0
						in	FGF8 or CTL								in	FGF8 or CTL
