# Supplementary material for: FGF8-mediated gene regulation affects regional identity in human cerebral organoids
Source: eLife. 2024 Nov 1;13:e98096. doi: 10.7554/eLife.98096 (PMC11581432; doi:10.7554/eLife.98096)
Supplement: Figure 4—figure supplement 2—source data 2. — Excel summary datasheet showing TBR1 and CTIP2 cell percentages in WNTi and WNTi + FGF8 organoids. [file elife-98096-fig4-figsupp2-data2.xlsx]

## Sheet: 15TRIS DAY53
	Faire des carrés de 500px a disposer sur le DAPI. En faire 6 et poser dans le sens horaire sur le bord de l'organoide
		N° images	CTIP2+	TBR1+	CTIP2+ TBR1+		%	CTIP2+	TBR1+	CTIP2+ TBR1+		moyenne	CTIP2+	TBR1+	CTIP2+ TBR1+				%moyenne	CTIP2+	TBR1+	CTIP2+ TBR1+		ERR	CTIP2+	TBR1+	CTIP2+ TBR1+
15TRIS DAY53	WNTi	14	36	29	115			20	16.1111	63.8889		WNTi	39.0333	19.6333	78.2333				WNTi organoids	32.0473	13.7897	54.163		WNTi	3.60287	1.4467	3.60441
			32	20	61			28.3186	17.6991	53.9823		WNTi+FGF8	52.2222	30.7222	13.9167				WNTi+FGF8 organoids	51.8439	34.8302	13.3259		WNTi+FGF8	4.34051	4.30313	2.18143
			28	24	98			18.6667	16	65.3333
			64	31	152			25.9109	12.5506	61.5385
			93	40	6			66.9065	28.777	4.31655		ERR	CTIP2+	TBR1+	CTIP2+ TBR1+
			64	31	128			28.6996	13.9013	57.3991		WNTi	4.00646	2.43796	8.35184
		15	17	18	116			11.2583	11.9205	76.8212		WNTi+FGF8	5.81161	4.31215	2.46092
			23	14	61			23.4694	14.2857	62.2449
			12	14	91			10.2564	11.9658	77.7778
			41	18	115			23.5632	10.3448	66.092
			86	18	45			57.7181	12.0805	30.2013
			61	24	126			28.91	11.3744	59.7156
		16	22	45	104			12.8655	26.3158	60.8187
			13	15	46			17.5676	20.2703	62.1622
			33	19	93			22.7586	13.1034	64.1379
			9	5	23			24.3243	13.5135	62.1622
			42	9	56			39.2523	8.41121	52.3364
			27	41	199			10.1124	15.3558	74.5318
		17	38	38	92			22.619	22.619	54.7619
			30	25	114			17.7515	14.7929	67.4556
			37	17	84			26.8116	12.3188	60.8696
			29	6	85			24.1667	5	70.8333
			58	18	81			36.9427	11.465	51.5924
			11	4	57			15.2778	5.55556	79.1667
		18	44	1	10			80	1.81818	18.1818
			19	4	1			79.1667	16.6667	4.16667
			65	9	87			40.3727	5.59006	54.0373
			31	1	23			56.3636	1.81818	41.8182
			69	4	40			61.0619	3.53982	35.3982
			37	47	38			30.3279	38.5246	31.1475
	WNTi+FGF8	20	31	26	3			51.6667	43.3333	5
			48	30	7			56.4706	35.2941	8.23529
			41	34	2			53.2468	44.1558	2.5974
			17	58	0			22.6667	77.3333	0
			10	24	23			17.5439	42.1053	40.3509
			46	7	42			48.4211	7.36842	44.2105
		21	83	10	4			85.567	10.3093	4.12371
			2	68	4			2.7027	91.8919	5.40541
			46	46	10			45.098	45.098	9.80392
			46	19	2			68.6567	28.3582	2.98507
			9	22	25			16.0714	39.2857	44.6429
			85	21	37			59.4406	14.6853	25.8741
		22	90	24	21			66.6667	17.7778	15.5556
			4	22	0			15.3846	84.6154	0
			11	73	1			12.9412	85.8824	1.17647
			57	44	2			55.3398	42.7184	1.94175
			61	18	22			60.396	17.8218	21.7822
			49	34	15			50	34.6939	15.3061
		23	32	37	22			35.1648	40.6593	24.1758
			3	138	4			2.06897	95.1724	2.75862
			61	31	22			53.5088	27.193	19.2982
			79	17	15			71.1712	15.3153	13.5135
			101	40	53			52.0619	20.6186	27.3196
			97	12	9			82.2034	10.1695	7.62712
		24	28	30	6			43.75	46.875	9.375
			23	70	50			16.0839	48.951	34.965
			93	3	2			94.898	3.06122	2.04082
			85	14	8			79.4393	13.0841	7.47664
			78	33	37			52.7027	22.2973	25
			69	14	14			71.134	14.433	14.433
		25	33	17	1			64.7059	33.3333	1.96078
			38	33	25			39.5833	34.375	26.0417
			69	6	7			84.1463	7.31707	8.53659
			160	2	2			97.561	1.21951	1.21951
			72	4	4			90	5	5
			23	25	0			47.9167	52.0833	0
