# Supplementary material for: FGF8-mediated gene regulation affects regional identity in human cerebral organoids
Source: eLife. 2024 Nov 1;13:e98096. doi: 10.7554/eLife.98096 (PMC11581432; doi:10.7554/eLife.98096)
Supplement: Figure 4—figure supplement 2—source data 4. — GraphPad sheet with ASCL1+ cell counts in WNTi and WNTi + FGF8 organoid cryostat slices. [file elife-98096-fig4-figsupp2-data4.xlsx]

## Sheet: 15TRIS DAY 69 14BIS DAY 107
	Modification image pour comptage : Niveau rouge flèche blance baissée à 80
		N° images name	Gwendo n°	MASH1 positives cells				MASH1 positive cells	barre erreur
15TRIS DAY69	WNTi	32	Image 6	7		15TRIS DAY69	WNTi	46.1667	12.4831
		33	image 5	47			WNTi+FGF8	317.167	62.5936
		34	Image 4	38		14BIS DAY107	WNTi	344.333	94.3408
		35	Image 3	38			WNTi+FGF8	649.5	180.018
		36	Image 2	46
		37	Image 1	101
	WNTi+FGF8	38	Image 6	427
		39	image 5	220	! Coupe pliée
		40	Image 4	219	! Coupe pliée
		41	Image 3	218
		42	Image 2	582
		43	Image 1	237
14BIS DAY107	WNTi	182	Image 1 TOP	588
		182	Image 1 BOTTOM	634
		183	Image 2 TOP	332
		183	Image 2	308
		184	Image 3 TOP	53
		184	Image 3	151
	WNTi+FGF8	185	Image 1 TOP	791	Tâche sur organoid du haut, probable sousestimation
		185	Image 1 BOTTOM	1086
		189	Image 2 TOP	197
		189	Image 2	3
		190	Image 3 TOP	870
		190	Image 3	950
