# Supplementary material for: FGF8-mediated gene regulation affects regional identity in human cerebral organoids
Source: eLife. 2024 Nov 1;13:e98096. doi: 10.7554/eLife.98096 (PMC11581432; doi:10.7554/eLife.98096)
Supplement: Figure 5—figure supplement 1—source data 1. — Excel summary datasheet with raw axon tracking measurements for control WNTi and FGF8-treated organoids on MEAs. [file elife-98096-fig5-figsupp1-data1.xlsx]

## Sheet: Axon Tracking FGF8 in time
				Axon Metrics
	treatment	sample ID		N° of analyzed neurons	N° of analyzed neurons with branches	Neuron Conduction Velocity [m/s]	Total Axon Length [µm]	Longest Branch Length [µm]	Longest Distance from Initiation Site [µm]	Longest Latency [ms]	Amplitude at Initiation Site [µV]
	WNTi day134-166	20231204 2DlastG day134 WNTi 18960		22	12	0.489	502.633	296.883	288.717	0.8	93.795
		20231206 2DlastG day136 WNTi 18960		25	17	0.468	812.106	487.6	455.306	1.768	109.196
		20231212 2DlastG day142 WNTi 18960		4	1	0.468	778.6	647.8	510.2	1.4	99.775
		20240213 2DLastH day157 WNTi 22485		1	1	0.598	1384.2	297.7	409.7	0.7	235
		20240216 2DLastH day160 WNTi 22485		3	1	0.288	208	208	211.5	0.75	89.9
		20240219 2DLastH day163 WNTi 22485		4	2	0.526	1006.25	433.6	413.3	1.65	169.825
		20240220 2DLastH day164 WNTi 22485		9	6	0.476	958.467	399.35	383.1	1.567	177.6
		20240222 2DLastH day166 WNTi 22485		10	6	0.452	965.717	451.167	442.983	2.017	133.69
				Total number analyzed neurons
				78	46
				Axon Metrics
	treatment	sample ID		N° of analyzed neurons	N° of analyzed neurons with branches	Neuron Conduction Velocity [m/s]	Total Axon Length [µm]	Longest Branch Length [µm]	Longest Distance from Initiation Site [µm]	Longest Latency [ms]	Amplitude at Initiation Site [µV]
	WNTi day202-215	20240209 2DLastG BISrotor day202 WNTi Full 22678		2	1	0.406	874.9	653.4	454.3	1.85	145.6
		20240212 2DLastG BISrotor day205 WNTi 22678		4	4	0.414	869.975	398.625	453.95	2.4	73.1
		20240214 2DLastG BISrotor day207 WNTi 22678 and Muscimol		10	7	0.499	564.871	276.471	327.286	0.957	96.1
		20240216 2DLastG BISrotor day209 WNTi 22678		11	6	0.533	1377.45	417.533	783.35	1.933	89.3
		20240219 2DLastG BISrotor day212 WNTi 22678		11	10	0.512	1155.58	485.97	565.41	1.54	97.591
		20240220 2DLastG BISrotor day213 WNTi 22678		21	18	0.463	1575.42	499.55	696.867	2.364	119.257
		20240221 2DLastG day214 WNTi 22555		7	5	0.461	777.54	451.98	461.06	1.02	65.357
		20240222 2DLastG BISrotor day215 WNTi 22678		26	23	0.444	1473.46	508.457	564.426	2.122	112.804
				Total number analyzed neurons
				92	74
				Axon Metrics
	treatment	sample ID		N° of analyzed neurons	N° of analyzed neurons with branches	Neuron Conduction Velocity [m/s]	Total Axon Length [µm]	Longest Branch Length [µm]	Longest Distance from Initiation Site [µm]	Longest Latency [ms]	Amplitude at Initiation Site [µV]
	WNTi+FGF8 day134-166	20231204 2DlastG day134 WNTi+FGF8 18994		5	1	0.484	94.7	94.7	289.7	0.2	60.58
		20231206 2DlastG day136 WNTi+FGF8 18994		9	4	0.474	183.575	183.575	196.325	0.588	92.211
		20231212 2DlastG day142 WNTi+FGF8 18994	NA
		20240213 2DLastH day157 WNTi+FGF8 22521		8	5	0.479	758.72	467.54	775.22	1.45	99.225
		20240216 2DLastH day160 WNTi+FGF8 22521		6	6	0.394	613.567	290.85	284.283	1.15	81.2
		20240219 2DLastH day163 WNTi+FGF8 22521		4	1	0.486	310.4	310.4	266.6	0.75	80.25
		20240220 2DLastH day164 WNTi+FGF8 22521		9	6	0.469	797.35	434.967	580.667	1.775	107.2
		20240222 2DLastH day166 WNTi+FGF8 22521		12	8	0.447	466.75	337.162	530.262	1.556	87.008
				Total number analyzed neurons
				53	31
				Axon Metrics
	treatment	sample ID		N° of analyzed neurons	N° of analyzed neurons with branches	Neuron Conduction Velocity [m/s]	Total Axon Length [µm]	Longest Branch Length [µm]	Longest Distance from Initiation Site [µm]	Longest Latency [ms]	Amplitude at Initiation Site [µV]
	WNTi+FGF8 day202-215	20240209 2DLastG BISrotor day202 WNTi+FGF8 22687	NA
		20240212 2DLastG BISrotor day205 WNTi+FGF8 22687		12	7	0.406	325.686	195.1	261.529	0.714	71.858
		20240214 2DLastG BISrotor day207 WNTi+FGF8 22687 and Muscimol		14	9	0.439	560.333	323.344	399.1	1.778	75.6
		20240216 2DLastG BISrotor day209 WNTi+FGF8 22687		16	14	0.489	742.05	455.986	385.421	1.364	84.888
		20240219 2DLastG BISrotor day212 WNTi+FGF8 22687		5	3	0.5	480.233	414.3	226.833	1.033	64.2
		20240220 2DLastG BISrotor day213 WNTi+FGF8 22687		16	12	0.483	603.983	366.783	447.583	1.429	94.219
		20240221 2DLastG day214 WNTi+FGF8 22672		3	2	0.452	747.35	409.1	404	1.1	67.867
		20240222 2DLastG BISrotor day215 WNTi+FGF8 22687		21	16	0.413	863.219	386.437	392.088	1.512	76.462
		20240223 2DLastG BISrotor day216 WNTi+FGF8 22687		25	16	0.466	998.937	424.881	362.325	1.403	97.184
				Total number analyzed neurons
				112	79
				Axon Metrics
				N° of analyzed neurons	N° of analyzed neurons with branches	Neuron Conduction Velocity [m/s]	Total Axon Length [µm]	Longest Branch Length [µm]	Longest Distance from Initiation Site [µm]	Longest Latency [ms]	Amplitude at Initiation Site [µV]
		Statistic TEST	day134-166	0.551795	0.597442	0.806597	0.0453627	0.173587	0.74045	0.362802	0.0239269
			day202-215	0.532391	0.852566	0.612642	0.0146286	0.0824378	0.0086192	0.0541982	0.0574012
		average		Axon Metrics
				N° of analyzed neurons	N° of analyzed neurons with branches	Neuron Conduction Velocity [m/s]	Total Axon Length [µm]	Longest Branch Length [µm]	Longest Distance from Initiation Site [µm]	Longest Latency [ms]	Amplitude at Initiation Site [µV]
		WNTi day134-166		9.75	5.75	0.470625	826.997	402.762	389.351	1.3315	138.598
		WNTi+FGF8 day134-166		7.57143	4.42857	0.461857	460.723	302.742	417.58	1.067	86.8106
		WNTi day202-215		11.5	9.25	0.4665	1083.65	461.498	538.331	1.77325	99.8886
		WNTi+FGF8 day202-215		14	9.875	0.456	665.224	371.991	359.86	1.29163	79.0348
		error bar		Axon Metrics
				N° of analyzed neurons	N° of analyzed neurons with branches	Neuron Conduction Velocity [m/s]	Total Axon Length [µm]	Longest Branch Length [µm]	Longest Distance from Initiation Site [µm]	Longest Latency [ms]	Amplitude at Initiation Site [µV]
		WNTi day134-166		3.19458	2.10229	0.0308712	124.647	48.3158	33.9684	0.181337	18.2073
		WNTi+FGF8 day134-166		1.04328	0.996593	0.0123354	104.528	49.6437	80.6331	0.216882	5.6938
		WNTi day202-215		2.89704	2.65754	0.016099	129.377	38.0999	51.9743	0.197434	9.13518
		WNTi+FGF8 day202-215		2.61861	1.95884	0.0123259	76.4705	28.9434	26.8084	0.116412	4.24459
