# Supplementary material for: FGF8-mediated gene regulation affects regional identity in human cerebral organoids
Source: eLife. 2024 Nov 1;13:e98096. doi: 10.7554/eLife.98096 (PMC11581432; doi:10.7554/eLife.98096)
Supplement: Figure 5—figure supplement 2—source data 1. — Excel summary datasheet with raw activity and network metrics for WNTi + FGF8 organoids before and during Bicuculline treatment. [file elife-98096-fig5-figsupp2-data1.xlsx]

## Sheet: Activity Scan GABA
	treatment	sample ID		Active electrodes %	Firing Rate [Hz]	Spike Amplitude [µV]	Interspike Interval [ms]
	WNTi+FGF8	20240214 2DLastG BISrotor day207 WNTi+FGF8 22687 and Muscimol	CTRL	0.88	0.58	38.49	59.65
	WNTi+FGF8	20240301 2DLastH day174 WNTi+FGF8 22521 and Bicuculline Washout Muscimol	CTRL/washout 2h after Bicuculline	0.89	0.55	45.85	94.45
	WNTi+FGF8	20240306 2DLastG BISrotor day228 WNTi+FGF8 22687 and Muscimol Washout	CTRL	1.16	0.57	49.41	66.21
	WNTi+FGF8	20240306 2DLastH day179 WNTi+FGF8 22521 and Muscimol Washout	CTRL	2	0.57	46.36	68.55
	WNTi+FGF8	202400315 2DLastG BISrotor day236 WNTi+FGF8 22687 with Muscimol and 2h washout	CTRL	3.68	0.72	48.31	66.68
	WNTi+FGF8	202400315 2DLastH day187 WNTi+FGF8 22521 with Muscimol and 2h washout	CTRL	6.5	0.67	49.1	68.44
	WNTi+FGF8	20240301 2DLastH day174 WNTi+FGF8 22521 and Bicuculline Washout Muscimol	CTRL	0.62	0.52	45.26	82.71
	WNTi+FGF8	20240228 2DLastG BISrotor day221 WNTi+FGF8 22687 and Bicuculline 10uM	CTRL	1.72	0.64	46.79	64.49
	WNTi+FGF8	20240228 2DLastH day172 WNTi+FGF8 22521 and Bicuculline	CTRL	1.96	0.53	48.78	74.51
	WNTi+FGF8	20240301 2DLastG BISrotor day223 WNTi+FGF8 22687 and Bicuculline	CTRL	0.49	0.47	42.77	69.95
	WNTi+FGF8	20240305 2DLastG BISrotor day227 WNTi+FGF8 22687 and Bicuculline Washout	CTRL	1.1	0.71	49.25	66.6
	WNTi+FGF8	20240305 2DLastH day178 WNTi+FGF8 22521 and Bicuculline	CTRL	1.48	0.54	48.56	66.86
	WNTi+FGF8	20240308 2DLastG BISrotor day230 WNTi+FGF8 22687 and Bicuculline	CTRL	2.53	0.7	47.99	65.59
	WNTi+FGF8	20240308 2DLastH day181 WNTi+FGF8 22521 and Bicuculline	CTRL	5.85	0.72	51.38	66.56
	WNTi+FGF8	20240312 2DLastH day185 WNTi+FGF8 22521 and Bicuculline	CTRL	4.68	0.64	50.55	64.28
	WNTi+FGF8	20240314 2DLastH day186 WNTi+FGF8 22521 and Bicuculline	CTRL	8.01	0.71	52.24	64.91
	treatment	sample ID		Active electrodes %	Firing Rate [Hz]	Spike Amplitude [µV]	Interspike Interval [ms]
	WNTi+FGF8	20240301 2DLastH day174 WNTi+FGF8 22521 and Bicuculline Washout Muscimol	Bicuculline	0.74	0.58	46.76	78.56
	WNTi+FGF8	20240228 2DLastG BISrotor day221 WNTi+FGF8 22687 and Bicuculline 10uM	Bicuculline	1.74	0.46	47.76	39.28
	WNTi+FGF8	20240228 2DLastH day172 WNTi+FGF8 22521 and Bicuculline	Bicuculline	2.22	0.46	48.64	52.88
	WNTi+FGF8	20240301 2DLastG BISrotor day223 WNTi+FGF8 22687 and Bicuculline	Bicuculline	0.38	0.38	46.54	46.91
	WNTi+FGF8	20240305 2DLastG BISrotor day227 WNTi+FGF8 22687 and Bicuculline Washout	Bicuculline	0.94	0.46	53.02	56.1
	WNTi+FGF8	20240305 2DLastH day178 WNTi+FGF8 22521 and Bicuculline	Bicuculline	2.03	0.42	51.11	50.59
	WNTi+FGF8	20240308 2DLastG BISrotor day230 WNTi+FGF8 22687 and Bicuculline	Bicuculline	2.76	0.57	50.42	43.02
	WNTi+FGF8	20240308 2DLastH day181 WNTi+FGF8 22521 and Bicuculline	Bicuculline	5.19	0.61	50.47	56.57
	WNTi+FGF8	20240312 2DLastH day185 WNTi+FGF8 22521 and Bicuculline	Bicuculline	6.21	0.59	52.57	51.92
	WNTi+FGF8	20240314 2DLastH day186 WNTi+FGF8 22521 and Bicuculline	Bicuculline	7.89	0.61	51.7	56.16
				Active electrodes %	Firing Rate [Hz]	Spike Amplitude [µV]	Interspike Interval [ms]
		Statistic TEST	CTRL/Bicuculline	0.884905	0.0193527	0.203552	0.000785938
		average
				Active electrodes %	Firing Rate [Hz]	Spike Amplitude [µV]	Interspike Interval [ms]
		CTRL		2.844	0.618	48.357	68.646
		Bicuculline 10µM		3.01	0.514	49.899	53.199
		error bar
				Active electrodes %	Firing Rate [Hz]	Spike Amplitude [µV]	Interspike Interval [ms]
		CTRL		0.793217	0.0298812	0.903322	1.84162
		Bicuculline 10µM		0.805684	0.0273333	0.741463	3.36183

## Sheet: Network Analysis GABA
				Network Metrics																																								aa
	treatment	sample ID		Burst Frequency [Hz]	Spikes within Bursts %	Number of Spikes per Burst	Number of Spikes per Burst per Electrode	Burst Duration [s]	Burst Peak Firing Rate [Hz]	Interburst Interval [s]	ISI within Burst [ms]	ISI outside Burst [ms]
	WNTi+FGF8	20240214 2DLastG BISrotor day207 WNTi+FGF8 22687 and Muscimol	CTRL	0.23	51.23	225.29	1.48	0.46	2.75	4.04	50.99	690.55
	WNTi+FGF8	20240301 2DLastH day174 WNTi+FGF8 22521 and Bicuculline Washout Muscimol	CTRL/washout 2h after Bicuculline	0.29	44.26	108.94	0.97	0.58	1.51	3.49	113.64	534.95
	WNTi+FGF8	20240306 2DLastG BISrotor day228 WNTi+FGF8 22687 and Muscimol Washout	CTRL	0.11	29.51	312.68	1.6	0.5	2.79	8.8	72.13	728.61
	WNTi+FGF8	20240306 2DLastH day179 WNTi+FGF8 22521 and Muscimol Washout	CTRL	0.21	30.97	336.08	0.97	0.49	1.75	4.8	70.63	807.91
	WNTi+FGF8	202400315 2DLastG BISrotor day236 WNTi+FGF8 22687 with Muscimol and 2h washout	CTRL	0.08	30.32	1870.36	2.71	0.56	4.36	12.62	63.84	588.4
	WNTi+FGF8	202400315 2DLastG BISrotor day236 WNTi+FGF8 22687 with Muscimol and 2h washout	CTRL BIS	0.08	26.92	1952.13	2.82	0.54	4.81	13.52	56.13	589.73
	WNTi+FGF8	202400315 2DLastH day187 WNTi+FGF8 22521 with Muscimol and 2h washout	CTRL	0.14	33.71	1905.4	1.98	0.49	3.58	7.08	70.61	750.81
	WNTi+FGF8	202400315 2DLastH day187 WNTi+FGF8 22521 with Muscimol and 2h washout	CTRL BIS	0.15	33.27	1844.61	1.9	0.52	3.39	6.63	72.37	754.77
	WNTi+FGF8	20240301 2DLastH day174 WNTi+FGF8 22521 and Bicuculline Washout Muscimol	CTRL	0.34	35.93	44.37	0.58	0.44	1.08	2.92	121.79	667.73
	WNTi+FGF8	20240228 2DLastG BISrotor day221 WNTi+FGF8 22687 and Bicuculline 10uM	CTRL	0.17	33.95	477.75	1.56	0.58	2.38	5.78	76.09	624.94
	WNTi+FGF8	20240228 2DLastH day172 WNTi+FGF8 22521 and Bicuculline	CTRL	0.16	28.95	370.39	1.2	0.51	2.1	6.07	62.52	764.68
	WNTi+FGF8	20240301 2DLastG BISrotor day223 WNTi+FGF8 22687 and Bicuculline	CTRL	0.18	29.83	69.31	0.71	0.5	1.22	5.56	128.83	978.45
	WNTi+FGF8	20240305 2DLastG BISrotor day227 WNTi+FGF8 22687 and Bicuculline Washout	CTRL	0.12	19.47	258.2	1.36	0.5	2.59	8.6	67.86	695.42
	WNTi+FGF8	20240305 2DLastH day178 WNTi+FGF8 22521 and Bicuculline	CTRL	0.27	31.36	171.95	0.74	0.47	1.36	3.71	70.52	586.25
	WNTi+FGF8	20240308 2DLastG BISrotor day230 WNTi+FGF8 22687 and Bicuculline	CTRL	0.08	30.69	1713.35	3.39	0.53	5.74	13.03	49.5	643.36
	WNTi+FGF8	20240308 2DLastH day181 WNTi+FGF8 22521 and Bicuculline	CTRL	0.17	30.38	1470.74	1.54	0.52	2.74	5.99	67.97	632.04
	WNTi+FGF8	20240312 2DLastH day185 WNTi+FGF8 22521 and Bicuculline	CTRL	0.18	31.07	1109.8	1.32	0.5	2.35	5.64	71.91	699.96
	WNTi+FGF8	20240312 2DLastH day185 WNTi+FGF8 22521 and Bicuculline	CTRL BIS	0.18	32.18	1109.25	1.32	0.52	2.3	5.5	73.83	683.34
	WNTi+FGF8	20240314 2DLastH day186 WNTi+FGF8 22521 and Bicuculline	CTRL	0.19	33.13	1235.95	1.29	0.51	2.26	5.29	76.71	622.73
	WNTi+FGF8	20240314 2DLastH day186 WNTi+FGF8 22521 and Bicuculline	CTRL BIS	0.17	26.29	946.33	1.01	0.47	1.87	5.76	65.21	612.71
	WNTi+FGF8	20240314 2DLastH day186 WNTi+FGF8 22521 and Bicuculline	CTRL TRIS	0.18	26.41	885.4	0.96	0.45	1.83	5.46	61.15	612.32
				Network Metrics
	treatment	sample ID		Burst Frequency [Hz]	Spikes within Bursts %	Number of Spikes per Burst	Number of Spikes per Burst per Electrode	Burst Duration [s]	Burst Peak Firing Rate [Hz]	Interburst Interval [s]	ISI within Burst [ms]	ISI outside Burst [ms]
	WNTi+FGF8	20240301 2DLastH day174 WNTi+FGF8 22521 and Bicuculline Washout Muscimol	Bicuculline	0.3	49.38	99.66	0.97	0.51	1.63	3.3	76.96	571.2
	WNTi+FGF8	20240228 2DLastG BISrotor day221 WNTi+FGF8 22687 and Bicuculline 10uM	Bicuculline	0.3	43.78	234.38	0.77	0.43	1.45	3.34	39.61	517.64
	WNTi+FGF8	20240228 2DLastG BISrotor day221 WNTi+FGF8 22687 and Bicuculline 10uM	Bicuculline BIS	0.27	41.74	256.42	0.84	0.44	1.58	3.73	50.74	555.92
	WNTi+FGF8	20240228 2DLastH day172 WNTi+FGF8 22521 and Bicuculline	Bicuculline	0.23	42.19	325.46	0.96	0.46	1.75	4.26	47.5	854.17
	WNTi+FGF8	20240228 2DLastH day172 WNTi+FGF8 22521 and Bicuculline	Bicuculline BIS	0.21	39.72	365.1	1.1	0.44	2.1	4.67	45.6	774.78
	WNTi+FGF8	20240301 2DLastG BISrotor day223 WNTi+FGF8 22687 and Bicuculline	Bicuculline	0.23	56.98	44.25	0.94	0.46	1.54	4.29	73.01	663.2
	WNTi+FGF8	20240305 2DLastG BISrotor day227 WNTi+FGF8 22687 and Bicuculline Washout	Bicuculline	0.16	26.59	128.49	0.89	0.5	1.58	6.48	81.25	765.07
	WNTi+FGF8	20240305 2DLastH day178 WNTi+FGF8 22521 and Bicuculline	Bicuculline	0.17	33.11	284.73	1.01	0.46	1.91	5.85	50.68	889.26
	WNTi+FGF8	20240308 2DLastG BISrotor day230 WNTi+FGF8 22687 and Bicuculline	Bicuculline	0.13	38.32	744.7	1.55	0.4	3.04	7.56	31.49	576.23
	WNTi+FGF8	20240308 2DLastG BISrotor day230 WNTi+FGF8 22687 and Bicuculline	Bicuculline BIS	0.11	30.98	577.59	1.25	0.41	2.46	9.3	37.2	630.23
	WNTi+FGF8	20240308 2DLastH day181 WNTi+FGF8 22521 and Bicuculline	Bicuculline	0.16	32.05	856.9	0.94	0.47	1.75	6.19	57.13	776.46
	WNTi+FGF8	20240308 2DLastH day181 WNTi+FGF8 22521 and Bicuculline	Bicuculline BIS	0.21	39.09	1330.76	1.45	0.53	2.52	4.79	63.26	555.34
	WNTi+FGF8	20240312 2DLastH day185 WNTi+FGF8 22521 and Bicuculline	Bicuculline	0.2	42.94	1087.57	1.14	0.54	1.9	5.02	71.19	651.91
	WNTi+FGF8	20240312 2DLastH day185 WNTi+FGF8 22521 and Bicuculline	Bicuculline BIS	0.18	40.41	1139.43	1.2	0.52	2.08	5.56	67.4	700.45
	WNTi+FGF8	20240314 2DLastH day186 WNTi+FGF8 22521 and Bicuculline	Bicuculline	0.11	29.39	1620.76	1.67	0.48	3.12	8.86	60.95	775.55
	WNTi+FGF8	20240314 2DLastH day186 WNTi+FGF8 22521 and Bicuculline	Bicuculline BIS	0.11	29.61	1484.85	1.57	0.53	2.68	8.64	68.68	765.99
	WNTi+FGF8	20240314 2DLastH day186 WNTi+FGF8 22521 and Bicuculline	Bicuculline TRIS	0.12	29.69	1470.56	1.54	0.5	2.83	8.57	62.56	757.98
				Burst Frequency [Hz]	Spikes within Bursts %	Number of Spikes per Burst	Number of Spikes per Burst per Electrode	Burst Duration [s]	Burst Peak Firing Rate [Hz]	Interburst Interval [s]	ISI within Burst [ms]	ISI outside Burst [ms]
		Statistic TEST	CTRL/Bicuculline	0.852315	0.00291336	0.808685	0.454464	0.109305	0.575448	0.813523	0.0116629	0.723398
		average		Network Metrics
				Burst Frequency [Hz]	Spikes within Bursts %	Number of Spikes per Burst	Number of Spikes per Burst per Electrode	Burst Duration [s]	Burst Peak Firing Rate [Hz]	Interburst Interval [s]	ISI within Burst [ms]	ISI outside Burst [ms]
		CTRL		0.183846	29.9723	758.676	1.30615	0.5	2.29385	6.10077	76.4531	678.764
		Bicuculline 10µM		0.188235	37.9982	708.918	1.16412	0.475294	2.11294	5.90647	57.9535	693.022
		error bar		Network Metrics
				Burst Frequency [Hz]	Spikes within Bursts %	Number of Spikes per Burst	Number of Spikes per Burst per Electrode	Burst Duration [s]	Burst Peak Firing Rate [Hz]	Interburst Interval [s]	ISI within Burst [ms]	ISI outside Burst [ms]
		CTRL		0.0175243	1.15355	155.117	0.194262	0.0101905	0.32131	0.680588	6.34918	28.2925
		Bicuculline 10µM		0.0154166	1.95681	132.766	0.07032	0.0104712	0.134434	0.489129	3.53737	27.3351
