# Supplementary material for: FGF8-mediated gene regulation affects regional identity in human cerebral organoids
Source: eLife. 2024 Nov 1;13:e98096. doi: 10.7554/eLife.98096 (PMC11581432; doi:10.7554/eLife.98096)
Supplement: Figure 5—source data 1. — Excel summary datasheet containing raw activity scan, network analysis, and axon tracking tool metrics for WNTi and WNTi + FGF8 organoids on MEA electrodes. [file elife-98096-fig5-data1.xlsx]

## Sheet: Activity Scan FGF8
																																																	a
	treatment	sample ID		Active electrodes %	Firing Rate [Hz]	Spike Amplitude [µV]	Interspike Interval [ms]
	WNTi	20231201 2DlastG day131 WNTi 18960	Full	2.33	0.46	41.78	80.36
		20231201 2DlastG day131 WNTi 18960	Sparse7x	2.27	0.45	39.58	66.49
		20231204 2DlastG day134 WNTi 18960	Full	2.94	0.58	42.41	52.33
		20231206 2DlastG day136 WNTi 18960	Full	4.33	0.64	43.35	59.36
		20231212 2DlastG day142 WNTi 18960	Full	0.72	0.4	38.23	59.12
		20240209 2DLastG BISrotor day202 WNTi Full 22678	Full	0.9	1.24	43.72	87.21
		20240212 2DLastG BISrotor day205 WNTi 22678	Full	1.41	0.94	38.05	62.26
		20240214 2DLastG BISrotor day207 WNTi 22678 and Muscimol	Full	2.36	0.81	40.98	57.97
		20240216 2DLastG BISrotor day209 WNTi 22678	Full	4.01	0.97	42.05	55.62
		20240219 2DLastG BISrotor day212 WNTi 22678	Full	2.66	0.92	41.59	68.72
		20240220 2DLastG BISrotor day213 WNTi 22678	Full	4.55	0.94	43.66	60.09
		20240221 2DLastG day214 WNTi 22555	Full	0.73	0.42	34.87	83.07
		20240222 2DLastG BISrotor day215 WNTi 22678	Full	6.08	0.89	46.64	58.15
		20240209 2DLastH day153 WNTi 22485	Full	0.67	2.49	55.5	102.51
		20240213 2DLastH day157 WNTi 22485	Full	1.52	1.27	49.5	73.86
		20240216 2DLastH day160 WNTi 22485	Full	1.72	1.29	45.15	70.07
		20240219 2DLastH day163 WNTi 22485	Full	1.8	1.34	48.38	74.36
		20240220 2DLastH day164 WNTi 22485	Full	3.8	0.96	46.85	72.51
		20240222 2DLastH day166 WNTi 22485	Full	4.32	0.79	46.95	65.06
	treatment	sample ID		Active electrodes %	Firing Rate [Hz]	Spike Amplitude [µV]	Interspike Interval [ms]
	WNTi+FGF8	20231201 2DlastG day131 WNTi+FGF8 18994	Full	1.17	0.53	38.54	74.51
		20231201 2DlastG day131 WNTi+FGF8 18994	Sparse7x	0.92	0.48	39	79.32
		20231204 2DlastG day134 WNTi+FGF8 18994	Full	1.05	0.46	38.8	65.15																																				0
		20231206 2DlastG day136 WNTi+FGF8 18994	Full	1.29	0.52	41.21	65.17
		20231212 2DlastG day142 WNTi+FGF8 18994	Full	0.77	0.64	42.55	69.1
		20240209 2DLastG BISrotor day202 WNTi+FGF8 22687	Full	0.32	0.38	39.4	49.99
		20240212 2DLastG BISrotor day205 WNTi+FGF8 22687	Full	0.63	0.54	40.62	50.86
		20240214 2DLastG BISrotor day207 WNTi+FGF8 22687 and Muscimol	Full	0.88	0.58	38.49	59.65
		20240216 2DLastG BISrotor day209 WNTi+FGF8 22687	Full	1.93	0.88	39.85	62.71
		20240219 2DLastG BISrotor day212 WNTi+FGF8 22687	Full	0.41	0.45	37.11	61.91
		20240220 2DLastG BISrotor day213 WNTi+FGF8 22687	Full	1.78	0.65	42	73.51
		20240221 2DLastG day214 WNTi+FGF8 22672	Full	0.07	0.5	35.43	70.23
		20240222 2DLastG BISrotor day215 WNTi+FGF8 22687	Full	1.74	0.69	39.57	65.26
		20240223 2DLastG BISrotor day216 WNTi+FGF8 22687	Full	2.3	0.66	45.61	60.2
		20240209 2DLastH day153 WNTi+FGF8 22521	Full	0.61	0.49	41.13	68.38
		20240213 2DLastH day157 WNTi+FGF8 22521	Full	1.73	0.65	42.25	69.7
		20240216 2DLastH day160 WNTi+FGF8 22521	Full	0.72	0.6	42.18	69.48
		20240219 2DLastH day163 WNTi+FGF8 22521	Full	0.37	0.54	45.87	72.49
		20240220 2DLastH day164 WNTi+FGF8 22521	Full	1.82	0.51	45.2	70.47
		20240222 2DLastH day166 WNTi+FGF8 22521	Full	1.23	0.6	42.06	62.92
				Active electrodes %	Firing Rate [Hz]	Spike Amplitude [µV]	Interspike Interval [ms]
		Statistic TEST		0.000296929	0.00192342	0.656812	0.392094
		average
				Active electrodes %	Firing Rate [Hz]	Spike Amplitude [µV]	Interspike Interval [ms]
		WNTi		2.58526	0.936842	42.0473	68.9011
		WNTi+FGF8		1.087	0.5675	40.8435	66.0505
		error bar
				Active electrodes %	Firing Rate [Hz]	Spike Amplitude [µV]	Interspike Interval [ms]
		WNTi		0.355779	0.110546	1.08524	2.90227
		WNTi+FGF8		0.136613	0.023987	0.598833	1.60338

## Sheet: Network Analysis FGF8
				Network Metrics																																								aa
	treatment	sample ID		Burst Frequency [Hz]	Spikes within Bursts %	Number of Spikes per Burst	Number of Spikes per Burst per Electrode	Burst Duration [s]	Burst Peak Firing Rate [Hz]	Interburst Interval [s]	ISI within Burst [ms]	ISI outside Burst [ms]
	WNTi	20231201 2DlastG day131 WNTi 18960	Full	0.1	33.16	602.26	0.82	0.49	1.48	9.14	54.59	955.6
		20231204 2DlastG day134 WNTi 18960	Firing	0.15	41.28	881.2	1.78	0.66	2.55	6.8	61.51	722.82
		20231204 2DlastG day134 WNTi 18960	Amplitude	0.17	38.95	742.38	1.51	0.57	2.42	5.78	58.25	688.48
		20231206 2DlastG day136 WNTi 18960	Firing	0.21	39.56	1075.31	1.36	0.58	2.15	4.92	74.3	582.44
		20231206 2DlastG day136 WNTi 18960	Amplitude	0.23	36.35	780.97	1	0.52	1.74	4.33	72.48	576.6
		20231212 2DlastG day142 WNTi 18960		0.37	39.95	33.81	0.4	0.43	0.76	2.73	32.5	917.27
		20231212 2DlastG day142 WNTi 18960		0.36	38.11	32.4	0.36	0.45	0.67	2.76	33.42	791.51
		20231213 2DlastG day143 WNTi 18960		0.29	30.58	132.02	0.52	0.52	0.92	3.44	57.75	516.94
		20240209 2DLastG BISrotor day202 WNTi Full 22678		0.26	51.96	129.95	1.05	0.55	1.67	3.71	97.98	505.74
		20240212 2DLastG BISrotor day205 WNTi 22678		0.3	45.75	189.8	0.95	0.54	1.6	3.31	76.34	429.46
		20240214 2DLastG BISrotor day207 WNTi 22678 and Muscimol		0.22	46.67	602.35	1.61	0.58	2.61	4.58	65.18	526.88
		20240216 2DLastG BISrotor day209 WNTi 22678		0.2	44.01	1498.05	2.07	0.48	3.77	5.02	48.88	484.64
		20240216 2DLastG BISrotor day209 WNTi 22678	BIS	0.19	42.27	1391.93	1.94	0.48	3.52	4.97	47.33	488.82
		20240219 2DLastG BISrotor day212 WNTi 22678		0.31	29.15	391.08	0.79	0.45	1.55	3.12	64.02	417.31
		20240220 2DLastG BISrotor day213 WNTi 22678		0.24	54.96	1829.31	2.1	0.51	3.71	3.98	57.76	403.16
		20240221 2DLastG day214 WNTi 22555		0.07	55.84	293.9	3.27	0.62	5.05	13.86	67.77	931.27
		20240222 2DLastG BISrotor day215 WNTi 22678		0.3	67.18	1714.03	1.85	0.45	3.39	3.32	55.54	454.3
		20240209 2DLastH day153 WNTi 22485		0.11	29.61	142.12	3.02	0.74	3.7	8.89	115.54	699.34
		20240213 2DLastH day157 WNTi 22485		0.27	50.86	266.54	1.42	0.43	2.6	3.67	81.38	507.52
		20240216 2DLastH day160 WNTi 22485		0.21	36.76	253.02	1.04	0.62	1.55	4.68	89.08	551.9
		20240219 2DLastH day163 WNTi 22485		0.21	30.02	265.61	0.98	0.57	1.63	4.66	84.57	464.24
		20240220 2DLastH day164 WNTi 22485		0.19	33.69	847.83	1.35	0.53	2.28	5.15	75.17	533.82
		20240222 2DLastH day166 WNTi 22485		0.24	41.6	696.24	1.08	0.44	2.1	4.16	50.36	651.48
				Network Metrics
	treatment	sample ID		Burst Frequency [Hz]	Spikes within Bursts %	Number of Spikes per Burst	Number of Spikes per Burst per Electrode	Burst Duration [s]	Burst Peak Firing Rate [Hz]	Interburst Interval [s]	ISI within Burst [ms]	ISI outside Burst [ms]
	WNTi+FGF8	20231201 2DlastG day131 WNTi+FGF8 18994	Full	0.15	30.53	214.67	0.34	0.65	0.51	6.74	104.51	1018.58
		20231204 2DlastG day134 WNTi+FGF8 18994	Firing	0.19	28.37	101.56	0.6	0.49	1.09	5.19	57.11	876.62
		20231204 2DlastG day134 WNTi+FGF8 18994	Amplitude	0.19	28.87	108.34	0.65	0.53	1.12	5.34	60.21	867.25
		20231206 2DlastG day136 WNTi+FGF8 18994	Firing	0.19	30.72	157.07	0.76	0.5	1.34	5	66.22	830.06
		20231206 2DlastG day136 WNTi+FGF8 18994	Amplitude	0.19	30.25	164.05	0.79	0.57	1.31	5.17	76.54	790.24
		20231212 2DlastG day142 WNTi+FGF8 18994		0.25	30.04	90.91	0.69	0.55	1.14	3.87	138.75	767.98
		20231212 2DlastG day142 WNTi+FGF8 18994		0.25	30.55	92.36	0.72	0.59	1.15	4.04	144.98	695.84
		20231213 2DlastG day143 WNTi+FGF8 18994		0.21	29.19	131.84	0.65	0.56	1.07	4.66	81.31	578.49
		20240209 2DLastG BISrotor day202 WNTi+FGF8 22687		0.22	33.56	42.42	0.88	0.51	1.53	4.5	71.28	474.03
		20240212 2DLastG BISrotor day205 WNTi+FGF8 22687		0.28	53.76	118.45	1.08	0.46	1.99	3.52	51.91	709.93
		20240214 2DLastG BISrotor day207 WNTi+FGF8 22687 and Muscimol		0.23	51.23	225.29	1.48	0.46	2.75	4.04	50.99	690.55
		20240216 2DLastG BISrotor day209 WNTi+FGF8 22687		0.29	46.4	558.74	1.5	0.44	2.8	3.46	53.8	476.91
		20240219 2DLastG BISrotor day212 WNTi+FGF8 22687		0.26	35.3	36.16	0.54	0.54	0.9	3.81	164.16	754.1
		20240220 2DLastG BISrotor day213 WNTi+FGF8 22687		0.16	25.81	385.33	1.15	0.54	1.97	6.41	87.55	759.83
		20240221 2DLastG day214 WNTi+FGF8 22672		0.22	49.79	12.65	0.9	0.48	1.54	4.39	63.09	1072.24
		20240222 2DLastG BISrotor day215 WNTi+FGF8 22687		0.27	31.2	236.17	0.7	0.5	1.26	3.68	78.02	574.59
		20240223 2DLastG BISrotor day216 WNTi+FGF8 22687		0.27	34.9	463.42	1.06	0.44	2	3.73	60.93	547.51
		20240209 2DLastH day153 WNTi+FGF8 22521		0.32	35.02	32.97	0.45	0.48	0.8	3.15	65.66	721.14
		20240213 2DLastH day157 WNTi+FGF8 22521		0.21	33.56	249.15	0.86	0.6	1.36	4.94	106.05	817.88
		20240216 2DLastH day160 WNTi+FGF8 22521		0.38	46.88	78.08	0.81	0.54	1.31	2.66	140.87	619.76
		20240219 2DLastH day163 WNTi+FGF8 22521		0.3	46.54	19.96	0.53	0.48	0.92	3.37	118.18	872.57
		20240220 2DLastH day164 WNTi+FGF8 22521		0.17	18.61	167.64	0.64	0.64	0.95	6.09	118.2	780.77
		20240222 2DLastH day166 WNTi+FGF8 22521		0.25	27.89	135.49	0.7	0.6	1.12	4.04	66.92	595.55
				Burst Frequency [Hz]	Spikes within Bursts %	Number of Spikes per Burst	Number of Spikes per Burst per Electrode	Burst Duration [s]	Burst Peak Firing Rate [Hz]	Interburst Interval [s]	ISI within Burst [ms]	ISI outside Burst [ms]
		Statistic TEST		0.586425	0.0243923	0.000192145	0.000818113	0.901167	0.000825394	0.256545	0.0104486	0.00704819
		average		Network Metrics
				Burst Frequency [Hz]	Spikes within Bursts %	Number of Spikes per Burst	Number of Spikes per Burst per Electrode	Burst Duration [s]	Burst Peak Firing Rate [Hz]	Interburst Interval [s]	ISI within Burst [ms]	ISI outside Burst [ms]
		WNTi		0.226087	41.6639	643.135	1.40304	0.53087	2.32261	5.08609	66.1609	600.067
		WNTi+FGF8		0.236957	35.1726	166.205	0.803478	0.528261	1.38826	4.42609	88.1409	734.453
		error bar		Network Metrics
				Burst Frequency [Hz]	Spikes within Bursts %	Number of Spikes per Burst	Number of Spikes per Burst per Electrode	Burst Duration [s]	Burst Peak Firing Rate [Hz]	Interburst Interval [s]	ISI within Burst [ms]	ISI outside Burst [ms]
		WNTi		0.016087	2.00939	113.454	0.155385	0.0166564	0.231176	0.530342	4.08066	34.7983
		WNTi+FGF8		0.0116	1.92783	29.2838	0.0607288	0.0125998	0.119425	0.219954	7.1314	32.3911

## Sheet: Axon Tracking FGF8
				Axon Metrics																			a
	treatment	sample ID		N° of analyzed neurons	N° of analyzed neurons with branches	Neuron Conduction Velocity [m/s]	Total Axon Length [µm]	Longest Branch Length [µm]	Longest Distance from Initiation Site [µm]	Longest Latency [ms]	Amplitude at Initiation Site [µV]
	WNTi	20231204 2DlastG day134 WNTi 18960		22	12	0.489	502.633	296.883	288.717	0.8	93.795
		20231206 2DlastG day136 WNTi 18960		25	17	0.468	812.106	487.6	455.306	1.768	109.196
		20231212 2DlastG day142 WNTi 18960		4	1	0.468	778.6	647.8	510.2	1.4	99.775
		20240209 2DLastG BISrotor day202 WNTi Full 22678		2	1	0.406	874.9	653.4	454.3	1.85	145.6
		20240212 2DLastG BISrotor day205 WNTi 22678		4	4	0.414	869.975	398.625	453.95	2.4	73.1
		20240214 2DLastG BISrotor day207 WNTi 22678 and Muscimol		10	7	0.499	564.871	276.471	327.286	0.957	96.1
		20240216 2DLastG BISrotor day209 WNTi 22678		11	6	0.533	1377.45	417.533	783.35	1.933	89.3
		20240219 2DLastG BISrotor day212 WNTi 22678		11	10	0.512	1155.58	485.97	565.41	1.54	97.591
		20240220 2DLastG BISrotor day213 WNTi 22678		21	18	0.463	1575.42	499.55	696.867	2.364	119.257
		20240221 2DLastG day214 WNTi 22555		7	5	0.461	777.54	451.98	461.06	1.02	65.357
		20240222 2DLastG BISrotor day215 WNTi 22678		26	23	0.444	1473.46	508.457	564.426	2.122	112.804
		20240213 2DLastH day157 WNTi 22485		1	1	0.598	1384.2	297.7	409.7	0.7	235
		20240216 2DLastH day160 WNTi 22485		3	1	0.288	208	208	211.5	0.75	89.9
		20240219 2DLastH day163 WNTi 22485		4	2	0.526	1006.25	433.6	413.3	1.65	169.825
		20240220 2DLastH day164 WNTi 22485		9	6	0.476	958.467	399.35	383.1	1.567	177.6
		20240222 2DLastH day166 WNTi 22485		10	6	0.452	965.717	451.167	442.983	2.017	133.69
				Total number analyzed neurons
				170	120
				Axon Metrics
	treatment	sample ID		N° of analyzed neurons	N° of analyzed neurons with branches	Neuron Conduction Velocity [m/s]	Total Axon Length [µm]	Longest Branch Length [µm]	Longest Distance from Initiation Site [µm]	Longest Latency [ms]	Amplitude at Initiation Site [µV]
	WNTi+FGF8	20231204 2DlastG day134 WNTi+FGF8 18994		5	1	0.484	94.7	94.7	289.7	0.2	60.58
		20231206 2DlastG day136 WNTi+FGF8 18994		9	4	0.474	183.575	183.575	196.325	0.588	92.211
		20231212 2DlastG day142 WNTi+FGF8 18994	NA
		20240209 2DLastG BISrotor day202 WNTi+FGF8 22687	NA
		20240212 2DLastG BISrotor day205 WNTi+FGF8 22687		12	7	0.406	325.686	195.1	261.529	0.714	71.858
		20240214 2DLastG BISrotor day207 WNTi+FGF8 22687 and Muscimol		14	9	0.439	560.333	323.344	399.1	1.778	75.6
		20240216 2DLastG BISrotor day209 WNTi+FGF8 22687		16	14	0.489	742.05	455.986	385.421	1.364	84.888
		20240219 2DLastG BISrotor day212 WNTi+FGF8 22687		5	3	0.5	480.233	414.3	226.833	1.033	64.2
		20240220 2DLastG BISrotor day213 WNTi+FGF8 22687		16	12	0.483	603.983	366.783	447.583	1.429	94.219
		20240221 2DLastG day214 WNTi+FGF8 22672		3	2	0.452	747.35	409.1	404	1.1	67.867
		20240222 2DLastG BISrotor day215 WNTi+FGF8 22687		21	16	0.413	863.219	386.437	392.088	1.512	76.462
		20240223 2DLastG BISrotor day216 WNTi+FGF8 22687		25	16	0.466	998.937	424.881	362.325	1.403	97.184
		20240213 2DLastH day157 WNTi+FGF8 22521		8	5	0.479	758.72	467.54	775.22	1.45	99.225
		20240216 2DLastH day160 WNTi+FGF8 22521		6	6	0.394	613.567	290.85	284.283	1.15	81.2
		20240219 2DLastH day163 WNTi+FGF8 22521		4	1	0.486	310.4	310.4	266.6	0.75	80.25
		20240220 2DLastH day164 WNTi+FGF8 22521		9	6	0.469	797.35	434.967	580.667	1.775	107.2
		20240222 2DLastH day166 WNTi+FGF8 22521		12	8	0.447	466.75	337.162	530.262	1.556	87.008
				Total number analyzed neurons
				165	110
				Axon Metrics
				N° of analyzed neurons	N° of analyzed neurons with branches	Neuron Conduction Velocity [m/s]	Total Axon Length [µm]	Longest Branch Length [µm]	Longest Distance from Initiation Site [µm]	Longest Latency [ms]	Amplitude at Initiation Site [µV]
		Statistic TEST		0.890532	0.939367	0.613028	0.00238898	0.035412	0.156695	0.0583965	0.00458773
		average		Axon Metrics
				N° of analyzed neurons	N° of analyzed neurons with branches	Neuron Conduction Velocity [m/s]	Total Axon Length [µm]	Longest Branch Length [µm]	Longest Distance from Initiation Site [µm]	Longest Latency [ms]	Amplitude at Initiation Site [µV]
		WNTi		10.625	7.5	0.468562	955.323	432.13	463.841	1.55237	119.243
		WNTi+FGF8		11	7.33333	0.458733	569.79	339.675	386.796	1.1868	82.6635
		error bar		Axon Metrics
				N° of analyzed neurons	N° of analyzed neurons with branches	Neuron Conduction Velocity [m/s]	Total Axon Length [µm]	Longest Branch Length [µm]	Longest Distance from Initiation Site [µm]	Longest Latency [ms]	Amplitude at Initiation Site [µV]
		WNTi		2.09538	1.69804	0.0168266	92.891	30.6741	35.6295	0.141494	11.0361
		WNTi+FGF8		1.66762	1.32258	0.00845913	66.9933	28.3116	39.3855	0.117976	3.51613
