# Supplementary material for: FGF8-mediated gene regulation affects regional identity in human cerebral organoids
Source: eLife. 2024 Nov 1;13:e98096. doi: 10.7554/eLife.98096 (PMC11581432; doi:10.7554/eLife.98096)
Supplement: Figure 6—source data 1. — Excel file listing genes with differential expression between WNTi and WNTi + FGF8 organoids in clusters 12 and 15 (glutamatergic cycling progenitors), visualized as a volcano plot in Figure 6A. [file elife-98096-fig6-data1.xlsx]

## Sheet: S21306_FGF8vsCTL_cls12-15
Gene name	p_val	avg_log2FC	pct.1	pct.2	p_val_adj	GO:biological proces	GO:molecular function	GO:cellular component
NR2F1	2.87343e-197	-1.67673	0.15	0.94	1.0517e-192	regulation of transcription, DNA-templated; intracellular receptor signaling pathway; steroid hormone mediated signaling pathway; cell differentiation; regulation of transcription by RNA polymerase II; negative regulation of transcription by RNA polymerase II; positive regulation of transcription by RNA polymerase II; anatomical structure development; signal transduction; transcription initiation…	zinc ion binding; metal ion binding; DNA binding; DNA-binding transcription factor activity; sequence-specific DNA binding; steroid hormone receptor activity; RNA polymerase II regulatory region sequence-specific DNA binding; protein binding; DNA-binding transcription factor activity, RNA polymerase II-specific; RNA polymerase II proximal promoter sequence-specific DNA binding; DNA-binding transc…	nucleus; cytosol; nucleoplasm
ZIC1	1.32656e-137	0.788622	0.543	0.037	4.85534e-133	multicellular organism development; cell differentiation; positive regulation of transcription, DNA-templated; nervous system development; positive regulation of protein import into nucleus; central nervous system development; brain development; pattern specification process; inner ear morphogenesis; regulation of smoothened signaling pathway; adult walking behavior; spinal cord development; posi…	nucleic acid binding; metal ion binding; DNA binding; DNA-binding transcription factor activity; DNA-binding transcription factor activity, RNA polymerase II-specific; RNA polymerase II regulatory region sequence-specific DNA binding; RNA polymerase II proximal promoter sequence-specific DNA binding; DNA-binding transcription activator activity, RNA polymerase II-specific	nucleus; cytoplasm
EFNA5	2.67072e-101	0.669805	0.519	0.084	9.77512e-97	positive regulation of protein phosphorylation; multicellular organism development; cell differentiation; ephrin receptor signaling pathway; nervous system development; axon guidance; regulation of microtubule cytoskeleton organization; regulation of actin cytoskeleton organization; activation of transmembrane receptor protein tyrosine kinase activity; regulation of GTPase activity; positive regu…	protein binding; ephrin receptor binding; transmembrane receptor protein tyrosine kinase activator activity; neurotrophin TRKA receptor binding; neurotrophin TRKB receptor binding; neurotrophin TRKC receptor binding; chemorepellent activity	membrane; plasma membrane; caveola; anchored component of membrane; anchored component of external side of plasma membrane; basement membrane; adherens junction; cell periphery; GABA-ergic synapse; integral component of membrane
SORCS1	6.58189e-90	0.588351	0.46	0.065	2.40904e-85	neuropeptide signaling pathway; post-Golgi vesicle-mediated transport	protein binding; neuropeptide receptor activity	membrane; integral component of membrane; Golgi apparatus
FGFR3	6.214e-86	-0.687726	0.041	0.516	2.27438e-81	protein phosphorylation; phosphorylation; positive regulation of cell population proliferation; apoptotic process; fibroblast growth factor receptor signaling pathway; transmembrane receptor protein tyrosine kinase signaling pathway; MAPK cascade; positive regulation of MAPK cascade; bone morphogenesis; positive regulation of ERK1 and ERK2 cascade; skeletal system development; positive regulation…	nucleotide binding; protein kinase activity; ATP binding; kinase activity; transferase activity; protein tyrosine kinase activity; transmembrane receptor protein tyrosine kinase activity; protein binding; identical protein binding; fibroblast growth factor-activated receptor activity; fibroblast growth factor binding	membrane; integral component of membrane; endoplasmic reticulum; Golgi apparatus; plasma membrane; extracellular region; cytoplasmic vesicle; focal adhesion; integral component of plasma membrane; receptor complex; transport vesicle; nucleus; cytoplasm; cell surface
AC092958.1	1.14987e-78	0.413809	0.312	0.01	4.20864e-74
CCND2	3.49727e-74	-0.833077	0.646	0.922	1.28003e-69	positive regulation of cell population proliferation; positive regulation of G1/S transition of mitotic cell cycle; negative regulation of apoptotic process; positive regulation of protein phosphorylation; protein phosphorylation; cell division; cell cycle; regulation of cyclin-dependent protein serine/threonine kinase activity; mitotic cell cycle phase transition; positive regulation of cyclin-d…	protein binding; protein kinase binding; protein kinase activity; cyclin-dependent protein serine/threonine kinase regulator activity	nucleus; cytoplasm; membrane; nucleoplasm; cytosol; nucleolus; nuclear membrane; chromatin; cyclin-dependent protein kinase holoenzyme complex
ANOS1	9.4574e-72	0.477829	0.387	0.058	3.4615e-67	cell adhesion; negative regulation of endopeptidase activity; chemotaxis; negative regulation of peptidase activity; axon guidance; fibroblast growth factor receptor signaling pathway	protein binding; peptidase inhibitor activity; heparin binding; serine-type endopeptidase inhibitor activity; extracellular matrix structural constituent	membrane; extracellular region; plasma membrane; extracellular space; extracellular matrix
GSX2	4.27733e-60	0.410702	0.245	0.009	1.56555e-55	regulation of transcription, DNA-templated; multicellular organism development; regulation of transcription by RNA polymerase II; regulation of respiratory gaseous exchange by nervous system process; pattern specification process; central nervous system development; brain development; spinal cord association neuron differentiation; subpallium development; hindbrain morphogenesis; forebrain dorsal…	DNA binding; DNA-binding transcription factor activity; sequence-specific DNA binding; DNA-binding transcription factor activity, RNA polymerase II-specific	nucleus; nuclear chromatin
DLX2	6.63394e-60	0.667738	0.263	0.015	2.42809e-55	regulation of transcription, DNA-templated; multicellular organism development; cell differentiation; regulation of transcription by RNA polymerase II; positive regulation of transcription by RNA polymerase II; negative regulation of transcription by RNA polymerase II; positive regulation of cell differentiation; brain development; negative regulation of photoreceptor cell differentiation; positi…	DNA binding; sequence-specific DNA binding; protein binding; DNA-binding transcription factor activity; RNA polymerase II proximal promoter sequence-specific DNA binding; DNA-binding transcription factor activity, RNA polymerase II-specific; RNA polymerase II regulatory region sequence-specific DNA binding; DNA-binding transcription activator activity, RNA polymerase II-specific; chromatin bindin…	nucleus; nuclear chromatin
LHFPL6	9.32404e-58	0.511491	0.374	0.075	3.41269e-53			membrane; integral component of membrane
FZD3	1.15517e-57	0.651826	0.93	0.809	4.22802e-53	signal transduction; cell surface receptor signaling pathway; G protein-coupled receptor signaling pathway; multicellular organism development; Wnt signaling pathway; nervous system development; canonical Wnt signaling pathway; non-canonical Wnt signaling pathway; neuron differentiation; Wnt signaling pathway, planar cell polarity pathway; Wnt signaling pathway, calcium modulating pathway; midbra…	transmembrane signaling receptor activity; G protein-coupled receptor activity; Wnt-activated receptor activity; protein binding; Wnt-protein binding; PDZ domain binding	cytoplasm; membrane; integral component of membrane; plasma membrane; cell surface; apical plasma membrane; lateral plasma membrane; axon; dendrite; filopodium tip; neuronal cell body; apical part of cell; presynaptic active zone
SALL3	1.21504e-53	0.275244	0.24	0.016	4.44716e-49	regulation of transcription, DNA-templated; olfactory bulb interneuron development; forelimb morphogenesis; hindlimb morphogenesis; negative regulation of smoothened signaling pathway	nucleic acid binding; metal ion binding; DNA binding	nucleus
MOXD1	1.16154e-51	0.654119	0.468	0.151	4.25136e-47	oxidation-reduction process; octopamine biosynthetic process; dopamine catabolic process; norepinephrine biosynthetic process	metal ion binding; monooxygenase activity; oxidoreductase activity; catalytic activity; protein binding; copper ion binding; oxidoreductase activity, acting on paired donors, with incorporation or reduction of molecular oxygen, reduced ascorbate as one donor, and incorporation of one atom of oxygen; dopamine beta-monooxygenase activity	membrane; integral component of membrane; endoplasmic reticulum; endoplasmic reticulum membrane; extracellular space; cytoplasm; secretory granule membrane
ZIC3	1.46712e-51	0.305671	0.277	0.036	5.36982e-47	multicellular organism development; cell differentiation; positive regulation of transcription, DNA-templated; nervous system development; positive regulation of transcription by RNA polymerase II; central nervous system development; heart looping; determination of left/right symmetry; somatic stem cell population maintenance; pattern specification process; anterior/posterior pattern specificatio…	nucleic acid binding; metal ion binding; DNA binding; DNA-binding transcription factor activity; sequence-specific DNA binding; DNA-binding transcription factor activity, RNA polymerase II-specific; RNA polymerase II regulatory region sequence-specific DNA binding; protein binding; RNA polymerase II proximal promoter sequence-specific DNA binding; DNA-binding transcription activator activity, RNA…	nucleus; cytoplasm; nucleoplasm
CFI	1.23291e-50	0.283805	0.197	0.004	4.51256e-46	proteolysis; endocytosis; immune system process; innate immune response; regulation of complement activation; viral process; complement activation, classical pathway	hydrolase activity; peptidase activity; serine-type endopeptidase activity; scavenger receptor activity; serine-type peptidase activity; protein binding; metal ion binding	membrane; extracellular space; extracellular region; extracellular exosome
ETV1	5.5749e-49	0.630688	0.592	0.288	2.04047e-44	regulation of transcription, DNA-templated; transcription by RNA polymerase II; cell differentiation; regulation of transcription by RNA polymerase II; positive regulation of transcription by RNA polymerase II; peripheral nervous system neuron development; axon guidance; muscle organ development; mechanosensory behavior; positive regulation of transcription, DNA-templated	DNA binding; DNA-binding transcription factor activity; sequence-specific DNA binding; protein binding; DNA-binding transcription factor activity, RNA polymerase II-specific; RNA polymerase II proximal promoter sequence-specific DNA binding; DNA-binding transcription activator activity, RNA polymerase II-specific	nucleus; nuclear chromatin
CDH6	2.26182e-46	0.345767	0.202	0.011	8.27847e-42	cell adhesion; homophilic cell adhesion via plasma membrane adhesion molecules; cell-cell adhesion; cell-cell junction assembly; adherens junction organization; cell morphogenesis; calcium-dependent cell-cell adhesion via plasma membrane cell adhesion molecules; cell-cell adhesion mediated by cadherin; Notch signaling pathway	calcium ion binding; metal ion binding; cadherin binding; protein homodimerization activity; cytoskeletal protein binding	membrane; integral component of membrane; plasma membrane; cell surface; cell-cell adherens junction; catenin complex
SLC1A2	7.99454e-46	0.471057	0.37	0.102	2.92608e-41	amino acid transport; ion transport; glutamate secretion; chemical synaptic transmission; L-glutamate transmembrane transport; protein homotrimerization; D-aspartate import across plasma membrane; L-glutamate import across plasma membrane; nervous system development; visual behavior; response to light stimulus; response to wounding; multicellular organism aging; telencephalon development; adult b…	metal ion binding; symporter activity; protein binding; L-glutamate transmembrane transporter activity; high-affinity glutamate transmembrane transporter activity; glutamate:sodium symporter activity; anion transmembrane transporter activity	membrane; integral component of membrane; plasma membrane; cell surface; integral component of plasma membrane; axon; axolemma; glutamatergic synapse; integral component of presynaptic membrane
C1orf61	4.05261e-44	-0.544626	0.887	0.99	1.4833e-39	positive regulation of transcription by RNA polymerase II		nucleus
LINC01896	1.11495e-43	0.275561	0.209	0.017	4.08083e-39
CXXC4	7.94339e-43	0.376306	0.33	0.08	2.90736e-38		zinc ion binding; DNA binding
NR2F1-AS1	1.65484e-41	-0.323166	0.049	0.343	6.05689e-37
TOX	2.69156e-41	0.345746	0.385	0.117	9.85139e-37	lymphocyte differentiation; positive regulation of natural killer cell differentiation; lymph node development; Peyer's patch development	DNA binding	nucleus
IFI44L	3.20829e-39	-0.493632	0.232	0.54	1.17427e-34	immune response; defense response to virus	GTP binding	cytoplasm
SHTN1	3.54349e-39	0.363685	0.312	0.075	1.29695e-34	multicellular organism development; axonogenesis; substrate-dependent cell migration, cell extension; Ras protein signal transduction; Cdc42 protein signal transduction; netrin-activated signaling pathway; positive regulation of axon extension; neuron projection morphogenesis; cytoplasmic actin-based contraction involved in cell motility; endoplasmic reticulum polarization; actin filament bundle …	protein binding; cadherin binding; actin filament binding; kinesin binding	cytoplasm; cytoskeleton; cell projection; perinuclear region of cytoplasm; axon; microtubule associated complex; microtubule cytoskeleton; lamellipodium; filopodium; growth cone; cell leading edge; perikaryon; axonal growth cone; microtubule
DLX1	3.89558e-39	0.409572	0.178	0.011	1.42582e-34	regulation of transcription, DNA-templated; multicellular organism development; cell differentiation; regulation of transcription by RNA polymerase II; negative regulation of transcription by RNA polymerase II; positive regulation of transcription by RNA polymerase II; positive regulation of cell differentiation; cellular response to transforming growth factor beta stimulus; negative regulation o…	DNA binding; sequence-specific DNA binding; DNA-binding transcription factor activity; protein binding; RNA polymerase II proximal promoter sequence-specific DNA binding; DNA-binding transcription factor activity, RNA polymerase II-specific; RNA polymerase II regulatory region sequence-specific DNA binding; chromatin binding	nucleus; nuclear chromatin
HEY1	3.76089e-38	-0.476884	0.258	0.571	1.37652e-33	positive regulation of gene expression; positive regulation of transcription by RNA polymerase II; ventricular septum morphogenesis; negative regulation of Notch signaling pathway; regulation of transcription, DNA-templated; multicellular organism development; Notch signaling pathway; cell differentiation; negative regulation of transcription by RNA polymerase II; anterior/posterior pattern speci…	protein dimerization activity; DNA binding; DNA-binding transcription factor activity; RNA polymerase II regulatory region sequence-specific DNA binding; protein binding; DNA-binding transcription factor activity, RNA polymerase II-specific; DNA-binding transcription repressor activity, RNA polymerase II-specific; transcription factor binding	nucleus; cytoplasm; nuclear chromatin; nucleoplasm
DMRTA2	7.52533e-38	-0.407654	0.274	0.613	2.75434e-33	regulation of transcription, DNA-templated; regulation of transcription by RNA polymerase II; positive regulation of neuroblast proliferation; cerebral cortex regionalization; skeletal muscle cell differentiation; neuron fate specification; dopaminergic neuron differentiation	metal ion binding; DNA binding; DNA-binding transcription factor activity; sequence-specific DNA binding; DNA-binding transcription factor activity, RNA polymerase II-specific; protein homodimerization activity; protein binding; protein heterodimerization activity	nucleus; nuclear chromatin
SFRP1	6.26948e-37	-0.592407	0.936	0.982	2.29469e-32	negative regulation of cell population proliferation; negative regulation of canonical Wnt signaling pathway; negative regulation of fibroblast proliferation; negative regulation of apoptotic process; proteolysis; multicellular organism development; Wnt signaling pathway; cell differentiation; positive regulation of Wnt signaling pathway; positive regulation of transcription, DNA-templated; canon…	protein binding; heparin binding; Wnt-protein binding; drug binding; frizzled binding; identical protein binding; cysteine-type endopeptidase activity	extracellular space; cytosol; plasma membrane; extracellular region; cell surface; extracellular exosome; collagen-containing extracellular matrix
BASP1	2.06824e-35	-0.394925	0.976	0.996	7.56995e-31	negative regulation of transcription, DNA-templated; substantia nigra development; glomerular visceral epithelial cell differentiation; diaphragm development; thorax and anterior abdomen determination; gonad development; mesenchymal to epithelial transition; positive regulation of heart growth; metanephric mesenchyme development; positive regulation of metanephric ureteric bud development	protein binding; transcription corepressor activity; transcription regulatory region DNA binding; protein domain specific binding	plasma membrane; nucleus; cytoplasm; nuclear speck; membrane; cell junction; cell projection; growth cone; extracellular exosome; COP9 signalosome; cytoskeleton; vesicle
DACH1	1.70202e-33	-0.45775	0.644	0.855	6.22957e-29	negative regulation of cell migration; multicellular organism development; regulation of transcription, DNA-templated; negative regulation of transcription by RNA polymerase II; negative regulation of transcription by competitive promoter binding; negative regulation of transcription, DNA-templated; suckling behavior; respiratory gaseous exchange by respiratory system; cell population proliferati…	DNA binding; protein binding; RNA polymerase II regulatory region sequence-specific DNA binding; DNA-binding transcription repressor activity, RNA polymerase II-specific; RNA polymerase II proximal promoter sequence-specific DNA binding; DNA-binding transcription factor activity, RNA polymerase II-specific; DNA-binding transcription factor activity	nucleus; transcription factor complex; cytoplasm
CYP26A1	1.0486e-32	0.177707	0.119	0	3.83799e-28	oxidation-reduction process; xenobiotic metabolic process; vitamin metabolic process; ergosterol biosynthetic process; sterol metabolic process; retinoic acid catabolic process; retinoic acid metabolic process; negative regulation of retinoic acid receptor signaling pathway; kidney development; response to retinoic acid; response to vitamin A	metal ion binding; monooxygenase activity; oxidoreductase activity; iron ion binding; oxidoreductase activity, acting on paired donors, with incorporation or reduction of molecular oxygen; heme binding; oxidoreductase activity, acting on paired donors, with incorporation or reduction of molecular oxygen, NAD(P)H as one donor, and incorporation of one atom of oxygen; C-22 sterol desaturase activit…	membrane; endoplasmic reticulum; endoplasmic reticulum membrane; organelle membrane; intracellular membrane-bounded organelle
OTX2	2.39799e-32	0.168702	0.16	0.014	8.77688e-28	regulation of transcription, DNA-templated; multicellular organism development; positive regulation of transcription, DNA-templated; positive regulation of transcription by RNA polymerase II; axon guidance; protein-containing complex assembly; positive regulation of embryonic development; dopaminergic neuron differentiation; midbrain development; regulation of smoothened signaling pathway; forebr…	DNA binding; DNA-binding transcription factor activity; sequence-specific DNA binding; protein binding; DNA-binding transcription factor activity, RNA polymerase II-specific; RNA polymerase II proximal promoter sequence-specific DNA binding; DNA-binding transcription activator activity, RNA polymerase II-specific; eukaryotic initiation factor 4E binding	nucleus; nuclear chromatin; growth cone; protein-containing complex
LHX2	4.22557e-32	-0.471363	0.829	0.956	1.5466e-27	regulation of transcription, DNA-templated; positive regulation of transcription, DNA-templated; neuron differentiation; positive regulation of transcription by RNA polymerase II; neural tube closure; hair follicle development; nervous system development; axon guidance; brain development; mesoderm development; dorsal/ventral pattern formation; telencephalon development; olfactory bulb development…	metal ion binding; DNA binding; sequence-specific DNA binding; DNA-binding transcription factor activity, RNA polymerase II-specific; RNA polymerase II regulatory region sequence-specific DNA binding; RNA polymerase II proximal promoter sequence-specific DNA binding; DNA-binding transcription activator activity, RNA polymerase II-specific; chromatin binding; transcription factor binding	nucleus; nuclear chromatin
ACTR3B	2.43644e-30	-0.364471	0.142	0.403	8.91763e-26	actin filament organization; Arp2/3 complex-mediated actin nucleation	nucleotide binding; ATP binding; actin binding; actin filament binding	cytoplasm; cytoskeleton; cell projection; Arp2/3 protein complex; extracellular exosome
NRXN3	2.8416e-30	0.442436	0.326	0.116	1.04006e-25	cell adhesion; axon guidance; learning; social behavior; neuron cell-cell adhesion; adult behavior; vocalization behavior; chemical synaptic transmission; neurotransmitter secretion; synapse assembly; regulation of synaptic vesicle exocytosis; angiogenesis; signal transduction	metal ion binding; signaling receptor activity; cell adhesion molecule binding; neuroligin family protein binding; calcium channel regulator activity; transmembrane signaling receptor activity	membrane; integral component of membrane; plasma membrane; integral component of plasma membrane; presynapse; protein-containing complex; GABA-ergic synapse
EPHA5	3.36833e-30	-0.281327	0.047	0.275	1.23284e-25	protein phosphorylation; phosphorylation; transmembrane receptor protein tyrosine kinase signaling pathway; peptidyl-tyrosine phosphorylation; ephrin receptor signaling pathway; nervous system development; axon guidance; neuron development; regulation of actin cytoskeleton organization; cAMP-mediated signaling; regulation of GTPase activity; positive regulation of CREB transcription factor activi…	nucleotide binding; protein kinase activity; ATP binding; kinase activity; transferase activity; protein tyrosine kinase activity; transmembrane receptor protein tyrosine kinase activity; ephrin receptor activity; transmembrane-ephrin receptor activity; GPI-linked ephrin receptor activity; protein binding	membrane; integral component of membrane; integral component of plasma membrane; plasma membrane; cell projection; perinuclear region of cytoplasm; dendrite; receptor complex; axon; neuron projection; external side of plasma membrane; rough endoplasmic reticulum; neuronal cell body; adherens junction; cell periphery
BCAT1	6.79087e-30	0.31536	0.264	0.074	2.48553e-25	cellular amino acid biosynthetic process; branched-chain amino acid metabolic process; branched-chain amino acid biosynthetic process; G1/S transition of mitotic cell cycle; branched-chain amino acid catabolic process; leucine biosynthetic process; valine biosynthetic process	transferase activity; catalytic activity; transaminase activity; branched-chain-amino-acid transaminase activity; L-leucine transaminase activity; L-valine transaminase activity; L-isoleucine transaminase activity; identical protein binding	cytoplasm; mitochondrion; cytosol
EMP3	1.19102e-29	-0.397723	0.246	0.514	4.35924e-25	cell growth; cell death; bleb assembly	protein binding	membrane; integral component of membrane; plasma membrane
NFIB	2.20909e-29	-0.486838	0.816	0.933	8.0855e-25	regulation of transcription, DNA-templated; DNA replication; positive regulation of transcription, DNA-templated; positive regulation of transcription by RNA polymerase II; negative regulation of transcription by RNA polymerase II; brain development; chondrocyte differentiation; glial cell differentiation; principal sensory nucleus of trigeminal nerve development; anterior commissure morphogenesi…	DNA binding; DNA-binding transcription factor activity; DNA-binding transcription factor activity, RNA polymerase II-specific; RNA polymerase II proximal promoter sequence-specific DNA binding; DNA-binding transcription activator activity, RNA polymerase II-specific; double-stranded DNA binding	nucleus; fibrillar center; nuclear chromatin; cerebellar mossy fiber; intracellular
MGST1	4.42733e-29	-0.473842	0.238	0.494	1.62045e-24	oxidation-reduction process; cellular oxidant detoxification; glutathione metabolic process; xenobiotic metabolic process; neutrophil degranulation; glutathione derivative biosynthetic process; protein homotrimerization; cellular response to lipid hydroperoxide; response to organonitrogen compound; response to lipopolysaccharide; Leydig cell differentiation; response to drug	transferase activity; protein binding; glutathione transferase activity; glutathione peroxidase activity; identical protein binding; protein homodimerization activity; glutathione binding	membrane; integral component of membrane; endoplasmic reticulum; endoplasmic reticulum membrane; intracellular membrane-bounded organelle; mitochondrion; mitochondrial outer membrane; plasma membrane; peroxisomal membrane; azurophil granule membrane; nucleus; apical part of cell
OLFM3	7.1154e-29	-0.346486	0.039	0.252	2.60431e-24	eye photoreceptor cell development	protein binding	extracellular region; cell junction; synapse; extracellular space; Golgi apparatus; AMPA glutamate receptor complex
HOPX	2.71013e-28	1.08502	0.568	0.377	9.91933e-24	cell differentiation; multicellular organism development; regulation of transcription by RNA polymerase II; chaperone-mediated protein complex assembly; trophectodermal cell differentiation; negative regulation of cell differentiation	DNA binding; protein binding; DNA-binding transcription factor activity, RNA polymerase II-specific	nucleus; cytoplasm; nuclear chromatin
GNG5	4.27866e-28	0.384554	0.993	0.985	1.56603e-23	G protein-coupled receptor signaling pathway; signal transduction	GTPase activity; protein binding; G-protein beta-subunit binding; PDZ domain binding	membrane; plasma membrane; heterotrimeric G-protein complex; G-protein beta/gamma-subunit complex; extracellular exosome
SCN1A	4.48941e-28	0.218057	0.183	0.031	1.64317e-23	transmembrane transport; ion transport; ion transmembrane transport; regulation of ion transmembrane transport; sodium ion transport; sodium ion transmembrane transport; neuronal action potential; cardiac muscle cell action potential involved in contraction; membrane depolarization during action potential; detection of mechanical stimulus involved in sensory perception of pain; action potential; …	ion channel activity; voltage-gated ion channel activity; sodium channel activity; voltage-gated sodium channel activity	membrane; integral component of membrane; plasma membrane; voltage-gated sodium channel complex; nucleoplasm; nuclear body; axon; Z disc; intercalated disc; T-tubule; node of Ranvier; sodium channel complex; neuronal cell body; axon initial segment
RPS10	4.8577e-28	-0.339863	1	0.995	1.77797e-23	translation; ribosomal small subunit assembly; viral transcription; translational initiation; nuclear-transcribed mRNA catabolic process, nonsense-mediated decay; SRP-dependent cotranslational protein targeting to membrane	RNA binding; structural constituent of ribosome; protein binding	nucleus; cytoplasm; membrane; cytosol; ribosome; cytosolic small ribosomal subunit; nucleolus; focal adhesion; nucleoplasm
CPNE3	1.0902e-27	-0.433625	0.781	0.896	3.99025e-23	protein phosphorylation; positive regulation of cell migration; neutrophil degranulation; cellular response to calcium ion; cellular response to growth factor stimulus; ERBB2 signaling pathway; glycerophospholipid biosynthetic process	RNA binding; protein serine/threonine kinase activity; protein binding; calcium-dependent phospholipid binding; calcium-dependent protein binding; receptor tyrosine kinase binding	nucleus; cytoplasm; membrane; nucleolus; cytosol; mitochondrion; plasma membrane; cell junction; focal adhesion; extracellular exosome; azurophil granule membrane
MEIS2	1.13371e-27	-0.472537	0.763	0.901	4.1495e-23	regulation of transcription, DNA-templated; multicellular organism development; positive regulation of transcription by RNA polymerase II; transcription by RNA polymerase II; negative regulation of myeloid cell differentiation; negative regulation of transcription by RNA polymerase II; eye development; visual learning; response to mechanical stimulus; pancreas development; positive regulation of …	DNA binding; protein binding; DNA-binding transcription factor activity, RNA polymerase II-specific; RNA polymerase II proximal promoter sequence-specific DNA binding; DNA-binding transcription activator activity, RNA polymerase II-specific; transcription factor binding; transcription corepressor activity; DNA-binding transcription factor activity; transcription coregulator activity; sequence-spe…	nucleus; cytoplasm; perinuclear region of cytoplasm; nuclear chromatin
STK17A	1.29318e-27	0.474109	0.553	0.322	4.73318e-23	protein phosphorylation; phosphorylation; apoptotic process; positive regulation of apoptotic process; intracellular signal transduction; positive regulation of fibroblast apoptotic process; regulation of reactive oxygen species metabolic process	nucleotide binding; protein kinase activity; protein serine/threonine kinase activity; ATP binding; kinase activity; transferase activity	nucleus; nuclear speck; plasma membrane
NES	2.07676e-27	0.616701	0.835	0.716	7.60116e-23	multicellular organism development; nervous system development; positive regulation of neural precursor cell proliferation; brain development; negative regulation of protein binding; negative regulation of catalytic activity; central nervous system development; G2/M transition of mitotic cell cycle; stem cell proliferation; embryonic camera-type eye development; positive regulation of intermediat…	protein binding; intermediate filament binding	intermediate filament cytoskeleton; intermediate filament; cytoplasm
COL2A1	2.11461e-27	0.208518	0.176	0.029	7.7397e-23	regulation of immune response; extracellular matrix organization; visual perception; collagen fibril organization; skeletal system development; sensory perception of sound; cartilage condensation; ossification; tissue homeostasis; endochondral ossification; chondrocyte differentiation; heart morphogenesis; proteoglycan metabolic process; central nervous system development; regulation of gene expr…	metal ion binding; extracellular matrix structural constituent; extracellular matrix structural constituent conferring tensile strength; identical protein binding; MHC class II protein binding; platelet-derived growth factor binding; proteoglycan binding; protein binding	extracellular space; extracellular region; collagen trimer; extracellular matrix; collagen-containing extracellular matrix; endoplasmic reticulum lumen; collagen type II trimer; basement membrane; cytoplasm
EMX1	2.98802e-27	-0.389871	0.281	0.57	1.09365e-22	regulation of transcription, DNA-templated; multicellular organism development; negative regulation of transcription by RNA polymerase II; neuron differentiation; regulation of transcription by RNA polymerase II; central nervous system development; brain development; in utero embryonic development; post-embryonic development; telencephalon development; cerebral cortex regionalization; cerebral co…	DNA binding; sequence-specific DNA binding; protein binding; RNA polymerase II proximal promoter sequence-specific DNA binding; DNA-binding transcription factor activity, RNA polymerase II-specific; DNA-binding transcription repressor activity, RNA polymerase II-specific; RNA polymerase II intronic transcription regulatory region sequence-specific DNA binding	nucleus; cytoplasm; nucleolus; nuclear chromatin
TSPO	5.49738e-27	-0.355548	0.223	0.496	2.01209e-22	lipid transport; protein targeting to mitochondrion; C21-steroid hormone biosynthetic process; regulation of cell population proliferation; heme biosynthetic process; anion transport; steroid metabolic process; regulation of cholesterol transport; steroid biosynthetic process; ion transport; chloride transport; aging; glial cell migration; response to manganese ion; response to vitamin B1; negati…	protein binding; cholesterol binding; benzodiazepine receptor activity; androgen binding; ion channel binding	membrane; integral component of membrane; mitochondrion; endoplasmic reticulum; mitochondrial membrane; extracellular exosome; mitochondrial outer membrane
NR2F2	8.31985e-27	-0.382391	0.153	0.402	3.04515e-22	negative regulation of endothelial cell proliferation; negative regulation of endothelial cell migration; positive regulation of transcription, DNA-templated; regulation of transcription, DNA-templated; intracellular receptor signaling pathway; steroid hormone mediated signaling pathway; cell differentiation; regulation of transcription by RNA polymerase II; negative regulation of transcription b…	zinc ion binding; metal ion binding; DNA binding; DNA-binding transcription factor activity; protein homodimerization activity; sequence-specific DNA binding; protein binding; steroid hormone receptor activity; RNA polymerase II regulatory region sequence-specific DNA binding; DNA-binding transcription factor activity, RNA polymerase II-specific; transcription corepressor activity; nuclear recept…	nucleus; cytosol; nucleoplasm
DPPA4	1.19217e-26	0.239577	0.222	0.054	4.36348e-22	multicellular organism development; somatic stem cell population maintenance	protein binding; chromatin binding	nucleus; nucleoplasm
KLHDC8A	1.46801e-26	0.487877	0.429	0.22	5.37306e-22		protein binding
CDK6	2.21094e-26	0.575593	0.546	0.334	8.09226e-22	negative regulation of epithelial cell proliferation; positive regulation of fibroblast proliferation; negative regulation of osteoblast differentiation; protein phosphorylation; phosphorylation; cell division; cell cycle; cell differentiation; regulation of cell population proliferation; negative regulation of cell population proliferation; response to virus; cell cycle arrest; negative regulati…	nucleotide binding; protein kinase activity; protein serine/threonine kinase activity; ATP binding; kinase activity; transferase activity; protein binding; cyclin-dependent protein serine/threonine kinase activity; cyclin binding; FBXO family protein binding	cytoplasm; nucleus; cytosol; nucleoplasm; cytoskeleton; cell projection; centrosome; microtubule organizing center; ruffle; cyclin-dependent protein kinase holoenzyme complex; cyclin D2-CDK6 complex
NCAM1	3.28583e-26	-0.366258	0.71	0.873	1.20265e-21	cell adhesion; viral entry into host cell; MAPK cascade; viral process; axon guidance; interferon-gamma-mediated signaling pathway; commissural neuron axon guidance; regulation of semaphorin-plexin signaling pathway	protein binding; virus receptor activity	membrane; integral component of membrane; cytosol; plasma membrane; extracellular region; anchored component of membrane; collagen-containing extracellular matrix; cell surface; Golgi membrane; external side of plasma membrane
MEST	1.42076e-25	0.481226	0.615	0.417	5.20011e-21	mesoderm development; regulation of lipid storage	hydrolase activity; catalytic activity	membrane; integral component of membrane; endoplasmic reticulum; endoplasmic reticulum membrane; extracellular exosome
SPRY1	1.90539e-25	0.340391	0.31	0.114	6.97391e-21	negative regulation of cell population proliferation; negative regulation of Ras protein signal transduction; negative regulation of ERK1 and ERK2 cascade; organ induction; epithelial to mesenchymal transition involved in cardiac fibroblast development; multicellular organism development; regulation of signal transduction; negative regulation of epidermal growth factor receptor signaling pathway;…	protein binding	cytoplasm; membrane; Golgi apparatus; cytosol; nucleoplasm; plasma membrane
FZD5	2.30785e-25	0.137233	0.124	0.01	8.44695e-21	positive regulation of transcription by RNA polymerase II; positive regulation of interleukin-1 beta secretion; positive regulation of tumor necrosis factor secretion; signal transduction; cell surface receptor signaling pathway; G protein-coupled receptor signaling pathway; multicellular organism development; Wnt signaling pathway; canonical Wnt signaling pathway; Wnt signaling pathway, planar c…	protein binding; transmembrane signaling receptor activity; G protein-coupled receptor activity; Wnt-activated receptor activity; lipid binding; Wnt-protein binding; ubiquitin protein ligase binding; amyloid-beta binding; protein kinase binding; protein-containing complex binding	membrane; integral component of membrane; Golgi apparatus; plasma membrane; cell projection; Golgi membrane; cell junction; synapse; dendrite; axon; integral component of plasma membrane; perikaryon; cell surface; early endosome membrane; clathrin-coated endocytic vesicle membrane; early endosome; bicellular tight junction; perinuclear region of cytoplasm
RASGRP1	1.30755e-24	-0.315281	0.162	0.398	4.78576e-20	intracellular signal transduction; small GTPase mediated signal transduction; cell differentiation; positive regulation of GTPase activity; positive regulation of protein phosphorylation; MAPK cascade; positive regulation of ERK1 and ERK2 cascade; signal transduction; positive regulation of interferon-gamma secretion; protein complex oligomerization; Ras protein signal transduction; positive regu…	metal ion binding; calcium ion binding; zinc ion binding; protein homodimerization activity; guanyl-nucleotide exchange factor activity; phosphatidylcholine binding; phosphatidylserine binding; Ras guanyl-nucleotide exchange factor activity; lipid binding; diacylglycerol binding	cytoplasm; membrane; cytosol; endoplasmic reticulum; endoplasmic reticulum membrane; Golgi apparatus; plasma membrane; Golgi membrane; mast cell granule; intracellular
PRCP	1.90625e-24	0.346492	0.444	0.231	6.97706e-20	proteolysis; neutrophil degranulation; blood coagulation, intrinsic pathway; negative regulation of systemic arterial blood pressure; regulation of blood vessel endothelial cell migration; angiogenesis involved in wound healing; regulation of thyroid hormone mediated signaling pathway; plasma kallikrein-kinin cascade; glucose homeostasis; energy homeostasis; regulation of reactive oxygen species …	hydrolase activity; protein binding; peptidase activity; serine-type peptidase activity; carboxypeptidase activity; dipeptidyl-peptidase activity; serine-type carboxypeptidase activity	lysosome; plasma membrane; extracellular exosome; azurophil granule membrane; ficolin-1-rich granule membrane; basal part of cell
TMSB10	2.30095e-24	0.487857	1	0.999	8.42169e-20	actin filament organization; regulation of cell migration; sequestering of actin monomers	actin binding; protein binding; actin monomer binding	cytoplasm; cytoskeleton
APP	4.49983e-24	0.434926	0.827	0.721	1.64698e-19	negative regulation of gene expression; cellular response to amyloid-beta; response to interleukin-1; microglial cell activation; positive regulation of NIK/NF-kappaB signaling; positive regulation of protein phosphorylation; positive regulation of gene expression; positive regulation of amyloid-beta formation; negative regulation of long-term synaptic potentiation; nervous system development; ce…	metal ion binding; DNA binding; serine-type endopeptidase inhibitor activity; protein binding; heparin binding; identical protein binding; transition metal ion binding; peptidase activator activity; signaling receptor activator activity; growth factor receptor binding; peptidase inhibitor activity; signaling receptor binding; enzyme binding; PTB domain binding	plasma membrane; nucleus; cytoplasm; membrane; integral component of membrane; Golgi apparatus; extracellular space; cell projection; extracellular region; perinuclear region of cytoplasm; cytoplasmic vesicle; smooth endoplasmic reticulum; clathrin-coated pit; cell surface; endosome; early endosome; rough endoplasmic reticulum; Golgi-associated vesicle; cell-cell junction; synaptic vesicle; COPII…
PIP5K1B	7.01503e-24	0.128297	0.121	0.011	2.56757e-19	phosphorylation; phosphatidylinositol metabolic process; phosphatidylinositol phosphorylation; phosphatidylinositol biosynthetic process; regulation of phosphatidylinositol 3-kinase signaling	nucleotide binding; ATP binding; kinase activity; transferase activity; phosphatidylinositol phosphate kinase activity; protein binding; 1-phosphatidylinositol-4-phosphate 5-kinase activity	membrane; cytosol; endomembrane system; uropod
FABP7	1.85288e-23	0.790374	0.985	0.988	6.78172e-19	triglyceride catabolic process; nervous system development; negative regulation of cell population proliferation; startle response; cell proliferation in forebrain; neurogenesis; epithelial cell proliferation; prepulse inhibition	lipid binding	cytoplasm; cytosol; nucleus; cell-cell junction; cell projection; neuronal cell body; cell body; cell periphery
LEMD1	2.53608e-23	0.225088	0.279	0.101	9.28232e-19			membrane; integral component of membrane
DNAJC1	2.75021e-23	0.455816	0.724	0.577	1.0066e-18	positive regulation of ATPase activity; negative regulation of proteolysis; regulation of protein secretion; regulation of translation; protein folding	DNA binding; protein binding; ATPase activator activity; chaperone binding	nucleus; membrane; integral component of membrane; endoplasmic reticulum; endoplasmic reticulum membrane; organelle membrane; intracellular membrane-bounded organelle; nuclear membrane; plasma membrane
DUSP6	3.25988e-23	0.222706	0.22	0.064	1.19315e-18	protein dephosphorylation; dephosphorylation; peptidyl-tyrosine dephosphorylation; inactivation of MAPK activity; negative regulation of protein phosphorylation; response to organic substance; positive regulation of cell death; response to organic cyclic compound; cell differentiation; response to drug; regulation of heart growth; negative regulation of ERK1 and ERK2 cascade; response to growth f…	hydrolase activity; phosphoprotein phosphatase activity; phosphatase activity; protein tyrosine/serine/threonine phosphatase activity; MAP kinase tyrosine/serine/threonine phosphatase activity; protein tyrosine phosphatase activity	cytoplasm; cytosol; nucleoplasm
B3GAT2	4.53448e-23	-0.401973	0.268	0.516	1.65967e-18	protein glycosylation; glycosaminoglycan metabolic process; chondroitin sulfate proteoglycan biosynthetic process	metal ion binding; transferase activity; galactosylgalactosylxylosylprotein 3-beta-glucuronosyltransferase activity	membrane; integral component of membrane; Golgi apparatus; Golgi membrane
TNC	4.76693e-23	0.406142	0.316	0.133	1.74475e-18	cell adhesion; regulation of cell population proliferation; cellular protein metabolic process; post-translational protein modification; extracellular matrix organization; osteoblast differentiation; response to wounding; negative regulation of cell adhesion; neuromuscular junction development; positive regulation of cell population proliferation; response to mechanical stimulus; positive regulat…	protein binding; extracellular matrix structural constituent; syndecan binding	extracellular space; membrane; extracellular region; collagen-containing extracellular matrix; focal adhesion; endoplasmic reticulum lumen; basement membrane; interstitial matrix; extracellular matrix; perisynaptic extracellular matrix
TLE2	5.32272e-23	-0.161696	0.002	0.149	1.94817e-18	regulation of transcription, DNA-templated; Wnt signaling pathway; negative regulation of canonical Wnt signaling pathway; signal transduction; negative regulation of transcription, DNA-templated; beta-catenin-TCF complex assembly; animal organ morphogenesis	protein binding; transcription corepressor activity; repressing transcription factor binding	nucleus; focal adhesion; extracellular space; nuclear body; transcription factor complex; nucleoplasm
CDH2	8.01588e-23	0.418225	0.936	0.903	2.93389e-18	cell adhesion; homophilic cell adhesion via plasma membrane adhesion molecules; cell-cell adhesion; heterophilic cell-cell adhesion via plasma membrane cell adhesion molecules; regulation of signal transduction; glial cell differentiation; calcium-dependent cell-cell adhesion via plasma membrane cell adhesion molecules; cell migration; telencephalon development; cerebral cortex development; posit…	metal ion binding; calcium ion binding; protein binding; enzyme binding; protein kinase binding; protein phosphatase binding; identical protein binding; cadherin binding; protein homodimerization activity; beta-catenin binding; cytoskeletal protein binding; gamma-catenin binding; alpha-catenin binding	cytoplasm; membrane; integral component of membrane; plasma membrane; cell junction; cell surface; focal adhesion; integral component of plasma membrane; cell-cell junction; adherens junction; fascia adherens; postsynaptic density; intercalated disc; basolateral plasma membrane; apical plasma membrane; lamellipodium; sarcolemma; plasma membrane raft; synapse; neuron projection; collagen-containin…
NMU	1.50994e-22	0.437578	0.413	0.216	5.52653e-18	regulation of smooth muscle contraction; neuropeptide signaling pathway; temperature homeostasis; gastric acid secretion; positive regulation of cytosolic calcium ion concentration; photoperiodism; positive regulation of heart rate; sensory perception of pain; positive regulation of heat generation; eating behavior; positive regulation of blood pressure in other organism; regulation of circadian …	neuromedin U receptor binding; protein binding; signaling receptor binding; type 1 neuromedin U receptor binding; type 2 neuromedin U receptor binding	extracellular region; terminal bouton
ANP32B	2.55103e-22	0.344744	0.959	0.927	9.33703e-18	nucleosome assembly; negative regulation of cell differentiation; activation of cysteine-type endopeptidase activity involved in apoptotic process; positive regulation of protein export from nucleus; vasculature development; ventricular system development; inner ear development; roof of mouth development	protein binding; histone binding; RNA polymerase binding	nucleus; cytoplasm; nucleolus; extracellular exosome
EPHA3	9.17822e-22	-0.282268	0.095	0.29	3.35932e-17	protein phosphorylation; phosphorylation; cell adhesion; transmembrane receptor protein tyrosine kinase signaling pathway; peptidyl-tyrosine phosphorylation; ephrin receptor signaling pathway; axon guidance; regulation of microtubule cytoskeleton organization; regulation of actin cytoskeleton organization; cell migration; regulation of epithelial to mesenchymal transition; regulation of GTPase ac…	nucleotide binding; protein kinase activity; ATP binding; kinase activity; transferase activity; protein tyrosine kinase activity; transmembrane receptor protein tyrosine kinase activity; ephrin receptor activity; protein binding; transmembrane-ephrin receptor activity; GPI-linked ephrin receptor activity	membrane; integral component of membrane; integral component of plasma membrane; plasma membrane; extracellular region; early endosome; receptor complex; neuron projection
PON2	1.08187e-21	0.585757	0.732	0.625	3.95974e-17	lipoxygenase pathway; response to toxic substance; aromatic compound catabolic process; response to oxidative stress	arylesterase activity; metal ion binding; hydrolase activity; identical protein binding; acyl-L-homoserine-lactone lactonohydrolase activity	extracellular region; membrane; plasma membrane; integral component of membrane; nucleus; mitochondrion; lysosome; intracellular membrane-bounded organelle
NFIC	1.09622e-21	-0.336501	0.321	0.561	4.01226e-17	regulation of transcription, DNA-templated; DNA replication; negative regulation of transcription by RNA polymerase II; positive regulation of transcription by RNA polymerase II; transcription by RNA polymerase II; odontogenesis of dentin-containing tooth; negative regulation of transcription, DNA-templated	DNA binding; DNA-binding transcription factor activity; DNA-binding transcription factor activity, RNA polymerase II-specific; RNA polymerase II proximal promoter sequence-specific DNA binding; DNA-binding transcription activator activity, RNA polymerase II-specific; proximal promoter sequence-specific DNA binding; double-stranded DNA binding	nucleus; intracellular; fibrillar center; nuclear chromatin
NSG1	1.49466e-21	-0.274543	0.22	0.456	5.47059e-17	apoptotic process; clathrin coat assembly; dopamine receptor signaling pathway; receptor recycling; positive regulation of receptor recycling; endosomal transport; amyloid precursor protein metabolic process; spontaneous synaptic transmission; neurotransmitter receptor transport, endosome to postsynaptic membrane; vesicle-mediated transport in synapse; neurotransmitter receptor cycle; postsynapti…	protein binding; clathrin light chain binding; signaling receptor binding	membrane; integral component of membrane; endoplasmic reticulum; endoplasmic reticulum membrane; Golgi apparatus; cell projection; cytoplasmic vesicle; cytoplasmic vesicle membrane; lysosome; dendrite; endosome; late endosome membrane; Golgi cisterna membrane; early endosome membrane; endosome membrane; late endosome; recycling endosome membrane; early endosome; lateral plasma membrane; trans-Gol…
HMGN2	1.65944e-21	0.278591	0.998	1	6.07372e-17	antimicrobial humoral immune response mediated by antimicrobial peptide; killing of cells of other organism	RNA binding; DNA binding; nucleosomal DNA binding; protein binding	nucleus; cytoplasm; extracellular space; chromatin
LGI2	1.74544e-21	0.137927	0.122	0.016	6.38848e-17		protein binding	extracellular region
FAT3	3.97285e-21	0.388097	0.548	0.352	1.4541e-16	cell adhesion; homophilic cell adhesion via plasma membrane adhesion molecules; multicellular organism development; cell-cell adhesion	calcium ion binding	membrane; integral component of membrane; plasma membrane
SIX3	5.94962e-21	0.195409	0.173	0.041	2.17762e-16	regulation of transcription, DNA-templated; multicellular organism development; brain development; eye development; visual perception; negative regulation of transcription, DNA-templated; anatomical structure development; regulation of cell population proliferation; negative regulation of neuron differentiation; apoptotic process involved in development; lens development in camera-type eye; epith…	DNA binding; DNA-binding transcription factor activity; DNA-binding transcription factor activity, RNA polymerase II-specific; protein binding; transcription coactivator activity; transcription regulatory region sequence-specific DNA binding; RNA polymerase II distal enhancer sequence-specific DNA binding; transcription corepressor binding; DNA-binding transcription activator activity, RNA polyme…	nucleus; nuclear chromatin; transcription factor complex
TCF4	6.59684e-21	-0.348983	0.83	0.917	2.41451e-16	positive regulation of transcription by RNA polymerase II; cell differentiation; positive regulation of transcription, DNA-templated; nervous system development; positive regulation of neuron differentiation; DNA-templated transcription, initiation; transcription initiation from RNA polymerase II promoter; protein-DNA complex assembly; negative regulation of transcription by RNA polymerase II; re…	protein dimerization activity; DNA binding; DNA-binding transcription factor activity; protein binding; identical protein binding; RNA polymerase II proximal promoter sequence-specific DNA binding; DNA-binding transcription factor activity, RNA polymerase II-specific; DNA-binding transcription activator activity, RNA polymerase II-specific; protein C-terminus binding; protein heterodimerization a…	nucleus; nuclear chromatin; transcription factor complex; beta-catenin-TCF complex; beta-catenin-TCF7L2 complex
GPC1	7.7568e-21	-0.355539	0.454	0.662	2.83907e-16	negative regulation of fibroblast growth factor receptor signaling pathway; regulation of signal transduction; leukocyte migration; positive regulation of skeletal muscle cell differentiation; cell migration; axon guidance; retinoid metabolic process; glycosaminoglycan biosynthetic process; glycosaminoglycan catabolic process; regulation of protein localization to membrane; Schwann cell different…	laminin binding; fibroblast growth factor binding; copper ion binding	membrane; cytosol; nucleoplasm; plasma membrane; extracellular space; extracellular region; membrane raft; collagen-containing extracellular matrix; anchored component of membrane; anchored component of plasma membrane; endosome; cell surface; synapse; extracellular matrix; extracellular exosome; intrinsic component of plasma membrane; lysosomal lumen; Golgi lumen
LRRN3	9.92403e-21	0.28371	0.144	0.027	3.63229e-16	positive regulation of synapse assembly	protein binding	membrane; integral component of membrane; extracellular space; extracellular matrix
MDFI	1.07095e-20	-0.234021	0.121	0.322	3.91978e-16	multicellular organism development; cell differentiation; negative regulation of transcription by RNA polymerase II; negative regulation of Wnt signaling pathway; cytoplasmic sequestering of transcription factor; negative regulation of DNA binding; dorsal/ventral axis specification; embryonic skeletal system morphogenesis; trophoblast giant cell differentiation	protein binding; identical protein binding; transcription factor binding	nucleus; cytoplasm
LINC01159	1.11582e-20	0.349622	0.542	0.36	4.08402e-16
COL11A1	1.8752e-20	-0.35217	0.525	0.739	6.86341e-16	extracellular matrix organization; visual perception; sensory perception of sound; collagen fibril organization; endodermal cell differentiation; detection of mechanical stimulus involved in sensory perception of sound; cartilage condensation; ossification; chondrocyte development; heart morphogenesis; proteoglycan metabolic process; tendon development; inner ear morphogenesis; embryonic skeletal…	metal ion binding; extracellular matrix structural constituent; extracellular matrix binding; extracellular matrix structural constituent conferring tensile strength; protein binding, bridging; heparin binding; heparan sulfate binding	extracellular region; collagen trimer; extracellular space; extracellular matrix; collagen-containing extracellular matrix; endoplasmic reticulum lumen; collagen type XI trimer
PHLDA1	2.48536e-20	-0.354507	0.393	0.633	9.09668e-16	apoptotic process; G2/M transition of mitotic cell cycle; positive regulation of apoptotic process; FasL biosynthetic process	protein binding	nucleus; nucleolus; cytoplasm; cytoplasmic vesicle; cytosol
ZEB2	8.14423e-20	0.357493	0.454	0.258	2.98087e-15	positive regulation of transcription by RNA polymerase II; nervous system development; negative regulation of transcription by RNA polymerase II; neural crest cell migration; somitogenesis; neural tube closure; central nervous system development; corpus callosum morphogenesis; hippocampus development; cell proliferation in forebrain; corticospinal tract morphogenesis; positive regulation of Wnt s…	nucleic acid binding; DNA binding; metal ion binding; protein binding; DNA-binding transcription factor activity, RNA polymerase II-specific; DNA-binding transcription repressor activity, RNA polymerase II-specific; phosphatase regulator activity; sequence-specific DNA binding; DNA-binding transcription activator activity, RNA polymerase II-specific; R-SMAD binding	nucleus; nucleolus; cytosol; nuclear chromatin
STRA6	8.93757e-20	-0.242802	0.121	0.314	3.27124e-15	retinoid metabolic process; embryonic digestive tract development; camera-type eye development; blood vessel development; heart development; lung development; lung vasculature development; ductus arteriosus closure; kidney development; pulmonary valve morphogenesis; ventricular septum development; learning; feeding behavior; adrenal gland development; female genitalia development; retinol transpo…	signaling receptor activity; retinol transmembrane transporter activity; retinal binding; retinol binding	membrane; integral component of membrane; plasma membrane; integral component of plasma membrane; protein-containing complex
STXBP6	1.02322e-19	-0.371171	0.153	0.356	3.7451e-15	vesicle-mediated transport; exocytosis; Golgi to plasma membrane transport; exocyst localization; cell-cell adhesion; regulation of SNARE complex assembly; negative regulation of exocytosis	phosphatidylinositol-4,5-bisphosphate binding; GTP-Rho binding; cadherin binding involved in cell-cell adhesion	cytoplasm; membrane; integral component of membrane; plasma membrane; exocyst; cell-cell adherens junction
ZNF521	1.20591e-19	0.247069	0.328	0.153	4.41374e-15	multicellular organism development; cell differentiation; neuron fate commitment	nucleic acid binding; metal ion binding; DNA binding; protein domain specific binding	nucleus
GRIP2	1.41023e-19	0.253022	0.31	0.136	5.16158e-15	positive regulation of signal transduction; neurotransmitter receptor transport, endosome to postsynaptic membrane; Notch signaling pathway; artery smooth muscle contraction; protein transport; positive regulation of blood pressure; vesicle-mediated transport in synapse	receptor signaling complex adaptor activity; protein binding	cytoplasm; membrane; plasma membrane; cytosol; postsynaptic density; dendrite; postsynaptic membrane; glutamatergic synapse
NFIA	1.99883e-19	-0.41807	0.755	0.893	7.3159e-15	regulation of transcription, DNA-templated; DNA replication; positive regulation of transcription by RNA polymerase II; negative regulation of transcription by RNA polymerase II; viral genome replication; synapse maturation; ureter development	DNA binding; DNA-binding transcription factor activity; DNA-binding transcription factor activity, RNA polymerase II-specific; RNA polymerase II proximal promoter sequence-specific DNA binding; DNA-binding transcription activator activity, RNA polymerase II-specific; transcription factor binding; chromatin binding	nucleus; nucleoplasm; cell junction; intracellular; nuclear chromatin
RHOJ	2.34226e-19	0.140575	0.119	0.018	8.5729e-15	small GTPase mediated signal transduction; positive regulation of cell migration involved in sprouting angiogenesis; Rho protein signal transduction; regulation of cell shape; actin cytoskeleton organization; retina vasculature morphogenesis in camera-type eye; regulation of small GTPase mediated signal transduction; endocytosis; angiogenesis; actin filament organization; regulation of actin cyto…	nucleotide binding; GTPase activity; GTP binding; protein binding; protein kinase binding	membrane; plasma membrane; cytoplasm; cytosol; extracellular exosome; cell cortex; cell projection; intracellular
MCC	2.84513e-19	0.185407	0.202	0.064	1.04135e-14	Wnt signaling pathway; negative regulation of canonical Wnt signaling pathway; signal transduction; negative regulation of epithelial cell proliferation; negative regulation of epithelial cell migration; establishment of protein localization	protein binding; signaling receptor activity; calcium ion binding	nucleus; cytoplasm; membrane; cytosol; nucleoplasm; plasma membrane; cell projection; lamellipodium
EMX2	4.31553e-19	-0.330026	0.635	0.816	1.57953e-14	regulation of transcription, DNA-templated; multicellular organism development; negative regulation of transcription by RNA polymerase II; neuron differentiation; regulation of transcription by RNA polymerase II; central nervous system development; brain development; anterior/posterior pattern specification; regulation of gene expression; dentate gyrus development; cerebral cortex regionalization…	DNA binding; sequence-specific DNA binding; protein binding; RNA polymerase II proximal promoter sequence-specific DNA binding; DNA-binding transcription factor activity, RNA polymerase II-specific; DNA-binding transcription repressor activity, RNA polymerase II-specific; RNA polymerase II intronic transcription regulatory region sequence-specific DNA binding	nucleus; nuclear chromatin
RBPMS	1.03778e-18	0.139041	0.175	0.047	3.79837e-14	positive regulation of nucleic acid-templated transcription; response to oxidative stress; positive regulation of pathway-restricted SMAD protein phosphorylation; RNA processing; positive regulation of SMAD protein signal transduction	nucleic acid binding; RNA binding; protein homodimerization activity; protein binding; transcription coactivator activity; mRNA binding; poly(A) binding	nucleus; cytoplasm; cytosol; nucleoplasm; P-body; cytoplasmic stress granule
HIST1H3D	1.17874e-18	-0.833893	0.499	0.616	4.31431e-14	nucleosome assembly; cellular protein metabolic process; regulation of gene silencing by miRNA; interleukin-7-mediated signaling pathway; regulation of megakaryocyte differentiation; DNA replication-dependent nucleosome assembly; blood coagulation; chromatin silencing at rDNA; negative regulation of gene expression, epigenetic; protein heterotetramerization; chromatin organization; telomere organ…	DNA binding; protein heterodimerization activity; protein binding; cadherin binding	nucleus; membrane; nucleosome; chromosome; extracellular region; nucleoplasm; extracellular exosome; protein-containing complex; nuclear chromosome; nuclear nucleosome
LMO2	1.63224e-18	0.236451	0.196	0.063	5.97414e-14	positive regulation of transcription by RNA polymerase II; regulation of hematopoietic stem cell differentiation; multicellular organism development; cellular response to thyroid hormone stimulus; mRNA transcription by RNA polymerase II	metal ion binding; protein binding; RNA polymerase II regulatory region sequence-specific DNA binding; DNA-binding transcription activator activity, RNA polymerase II-specific; bHLH transcription factor binding; DNA-binding transcription factor activity, RNA polymerase II-specific; RNA polymerase II activating transcription factor binding; E-box binding; cofactor binding	nucleus; nucleoplasm; transcription factor complex
TLE5	3.65208e-18	-0.322419	0.703	0.836	1.3367e-13	regulation of transcription, DNA-templated; Wnt signaling pathway; negative regulation of canonical Wnt signaling pathway; negative regulation of gene expression; multicellular organism development; negative regulation of transcription by RNA polymerase II; negative regulation of transcription, DNA-templated; animal organ morphogenesis; negative regulation of protein binding; response to interleu…	protein binding; transcription corepressor activity; repressing transcription factor binding	nucleus; transcription factor complex
HIST1H4C	4.69449e-18	-0.817567	0.852	0.924	1.71823e-13	nucleosome assembly; DNA-templated transcription, initiation; cellular protein metabolic process; regulation of gene silencing by miRNA; CENP-A containing nucleosome assembly; regulation of megakaryocyte differentiation; DNA replication-dependent nucleosome assembly; DNA replication-independent nucleosome assembly; chromatin silencing at rDNA; negative regulation of gene expression, epigenetic; p…	RNA binding; DNA binding; protein heterodimerization activity; protein binding; protein domain specific binding	nucleus; membrane; nucleosome; chromosome; extracellular region; nucleoplasm; extracellular exosome; protein-containing complex; nuclear chromosome, telomeric region; nuclear chromosome; nuclear nucleosome
GFRA1	7.21061e-18	0.1629	0.147	0.035	2.63916e-13	nervous system development; MAPK cascade; axon guidance; glial cell-derived neurotrophic factor receptor signaling pathway; cell surface receptor signaling pathway	signaling receptor activity; signaling receptor binding; glial cell-derived neurotrophic factor receptor activity	membrane; Golgi apparatus; plasma membrane; external side of plasma membrane; anchored component of membrane; endosome; receptor complex; extracellular exosome; extrinsic component of membrane; multivesicular body
NFIX	8.46229e-18	-0.161617	0.024	0.162	3.09728e-13	regulation of transcription, DNA-templated; DNA replication; negative regulation of transcription by RNA polymerase II; positive regulation of transcription by RNA polymerase II; transcription by RNA polymerase II	DNA binding; DNA-binding transcription factor activity; protein binding; DNA-binding transcription factor activity, RNA polymerase II-specific	nucleus; nuclear chromatin; intracellular; nucleoplasm
FGFR2	1.11721e-17	-0.27732	0.168	0.355	4.08911e-13	protein phosphorylation; phosphorylation; positive regulation of cell population proliferation; apoptotic process; positive regulation of Wnt signaling pathway; bone development; fibroblast growth factor receptor signaling pathway; transmembrane receptor protein tyrosine kinase signaling pathway; negative regulation of transcription by RNA polymerase II; axonogenesis; positive regulation of trans…	nucleotide binding; protein kinase activity; ATP binding; kinase activity; transferase activity; protein tyrosine kinase activity; transmembrane receptor protein tyrosine kinase activity; protein homodimerization activity; protein binding; fibroblast growth factor-activated receptor activity; heparin binding; fibroblast growth factor binding	nucleus; cytoplasm; membrane; integral component of membrane; intracellular membrane-bounded organelle; nucleoplasm; Golgi apparatus; plasma membrane; extracellular region; cytoplasmic vesicle; cell surface; integral component of plasma membrane; receptor complex; collagen-containing extracellular matrix; cell cortex; excitatory synapse
FAM181B	1.82642e-17	0.516175	0.571	0.413	6.6849e-13
IFI27L2	2.0585e-17	-0.334067	0.551	0.723	7.53431e-13	apoptotic process		membrane; integral component of membrane; mitochondrion; mitochondrial membrane
ETV4	2.32641e-17	0.134442	0.132	0.029	8.51488e-13	regulation of transcription, DNA-templated; cell differentiation; regulation of transcription by RNA polymerase II; positive regulation of transcription by RNA polymerase II	DNA binding; DNA-binding transcription factor activity; sequence-specific DNA binding; protein binding; DNA-binding transcription factor activity, RNA polymerase II-specific; RNA polymerase II proximal promoter sequence-specific DNA binding; DNA-binding transcription activator activity, RNA polymerase II-specific	nucleus; nucleolus; nuclear chromatin; nucleoplasm
ABCA1	2.62481e-17	0.208937	0.302	0.14	9.60706e-13	cholesterol homeostasis; cellular response to low-density lipoprotein particle stimulus; transmembrane transport; lipid metabolic process; steroid metabolic process; cholesterol metabolic process; regulation of Cdc42 protein signal transduction; response to laminar fluid shear stress; cholesterol efflux; regulation of lipid metabolic process; lipid transport; high-density lipoprotein particle ass…	nucleotide binding; ATP binding; protein binding; ATPase activity; ATPase-coupled transmembrane transporter activity; ATPase-coupled intramembrane lipid transporter activity; lipid transporter activity; phosphatidylcholine binding; ATPase binding; signaling receptor binding; cholesterol binding; phospholipid transporter activity; high-density lipoprotein particle binding; syntaxin binding; small …	perinuclear region of cytoplasm; membrane; integral component of membrane; plasma membrane; endosome; intracellular membrane-bounded organelle; endoplasmic reticulum membrane; integral component of plasma membrane; membrane raft; Golgi apparatus; external side of plasma membrane; cell surface; endocytic vesicle; phagocytic vesicle
BAALC	2.80525e-17	0.207766	0.196	0.065	1.02675e-12			cytoplasm; membrane; nucleus; cytosol; plasma membrane; cell junction; synapse; postsynaptic membrane; membrane raft; postsynaptic density; neuron projection
ROBO1	3.09684e-17	0.286748	0.506	0.317	1.13347e-12	positive regulation of gene expression; negative regulation of gene expression; ventricular septum morphogenesis; axon guidance; multicellular organism development; cell differentiation; chemotaxis; axon midline choice point recognition; Roundabout signaling pathway; nervous system development; cell adhesion; aorta development; homophilic cell adhesion via plasma membrane adhesion molecules; acti…	protein binding; axon guidance receptor activity; identical protein binding; LRR domain binding	cytoplasm; membrane; integral component of membrane; plasma membrane; cell projection; cell surface; axon; integral component of plasma membrane; endoplasmic reticulum-Golgi intermediate compartment membrane
WWTR1	3.10842e-17	0.175321	0.189	0.061	1.13771e-12	negative regulation of canonical Wnt signaling pathway; negative regulation of protein kinase activity; positive regulation of transcription by RNA polymerase II; hippo signaling; positive regulation of cell population proliferation; regulation of transcription, DNA-templated; transcription initiation from RNA polymerase II promoter; positive regulation of epithelial to mesenchymal transition; ne…	protein binding; transcription coactivator activity; transcription corepressor activity; protein homodimerization activity	cytoplasm; nucleus; cytosol; nucleoplasm; nuclear body; transcription factor complex
AL136366.1	4.44222e-17	-0.138036	0.016	0.141	1.6259e-12
ZNF703	5.14589e-17	-0.14772	0.052	0.202	1.88345e-12	positive regulation of cell migration; positive regulation of cell population proliferation; regulation of cell cycle; regulation of transcription, DNA-templated; negative regulation of transcription, DNA-templated; positive regulation of epithelial to mesenchymal transition; mammary gland epithelial cell differentiation; adherens junction assembly; cellular response to estradiol stimulus; regula…	nucleic acid binding; metal ion binding; protein binding; repressing transcription factor binding	nucleus; cytoplasm; protein-containing complex; nuclear matrix
MAP6	5.31726e-17	0.278253	0.533	0.358	1.94617e-12	microtubule cytoskeleton organization; cytoskeleton-dependent intracellular transport; regulation of microtubule cytoskeleton organization; positive regulation of axonogenesis; lysosome localization; dendrite morphogenesis	microtubule binding; calmodulin binding; protein binding	cytoplasm; membrane; Golgi apparatus; cytoskeleton; cell projection; perinuclear region of cytoplasm; cytoplasmic vesicle; microtubule; dendrite; cis-Golgi network; axon; transport vesicle membrane; Golgi-associated vesicle
CRH	5.91498e-17	0.603328	0.132	0.03	2.16494e-12	inflammatory response; positive regulation of protein phosphorylation; synaptic transmission, dopaminergic; negative regulation of systemic arterial blood pressure; glucocorticoid biosynthetic process; learning or memory; steroid metabolic process; positive regulation of cell population proliferation; associative learning; hormone-mediated apoptotic signaling pathway; positive regulation of gene …	protein binding; hormone activity; corticotropin-releasing hormone receptor 1 binding; corticotropin-releasing hormone receptor 2 binding; signaling receptor binding; neuropeptide hormone activity; corticotropin-releasing hormone activity	extracellular region; extracellular space; cytoplasm; neuronal cell body; varicosity; perikaryon
VCAN	5.93681e-17	-0.350408	0.812	0.899	2.17293e-12	cell adhesion; cellular protein metabolic process; post-translational protein modification; central nervous system development; multicellular organism development; extracellular matrix organization; skeletal system development; chondroitin sulfate biosynthetic process; chondroitin sulfate catabolic process; dermatan sulfate biosynthetic process; osteoblast differentiation; cell recognition	carbohydrate binding; calcium ion binding; protein binding; hyaluronic acid binding; extracellular matrix structural constituent conferring compression resistance; glycosaminoglycan binding	extracellular space; membrane; extracellular region; extracellular matrix; collagen-containing extracellular matrix; endoplasmic reticulum lumen; lysosomal lumen; Golgi lumen
B2M	1.14706e-16	0.434207	0.902	0.888	4.19837e-12	immune response; immune system process; regulation of immune response; antigen processing and presentation of peptide antigen via MHC class I; cellular protein metabolic process; retina homeostasis; antigen processing and presentation of exogenous peptide antigen via MHC class I, TAP-dependent; innate immune response; neutrophil degranulation; positive regulation of receptor-mediated endocytosis;…	protein binding; identical protein binding; protein homodimerization activity	membrane; Golgi apparatus; cytosol; plasma membrane; extracellular space; extracellular region; cell surface; focal adhesion; MHC class I protein complex; extracellular exosome; phagocytic vesicle membrane; HFE-transferrin receptor complex; endoplasmic reticulum lumen; specific granule lumen; tertiary granule lumen; Golgi membrane; ER to Golgi transport vesicle membrane; MHC class I peptide loadi…
ID4	1.25436e-16	-0.344305	0.894	0.951	4.59107e-12	negative regulation of transcription, DNA-templated; neuron differentiation; regulation of cell cycle; circadian rhythm; regulation of transcription by RNA polymerase II; negative regulation of DNA binding; negative regulation of neuron differentiation; G1/S transition of mitotic cell cycle; negative regulation of transcription by RNA polymerase II; osteoblast differentiation; neuroblast prolifer…	protein dimerization activity; protein binding; DNA-binding transcription factor activity; DNA-binding transcription factor activity, RNA polymerase II-specific; transcription factor binding; transcription corepressor activity; RNA polymerase II transcription factor binding	nucleus; cytoplasm
PACSIN3	1.34196e-16	-0.163734	0.057	0.206	4.91171e-12	plasma membrane tubulation; endocytosis; cytoskeleton organization; positive regulation of membrane protein ectodomain proteolysis; negative regulation of endocytosis; negative regulation of calcium ion transport	protein binding; lipid binding; phospholipid binding; cytoskeletal protein binding; calcium channel inhibitor activity	cytoplasm; membrane; cytosol; plasma membrane; extracellular exosome; cytoskeleton
RBP1	1.54138e-16	0.486853	0.325	0.164	5.64159e-12	retinoic acid biosynthetic process; vitamin A metabolic process; retinoid metabolic process; lipid homeostasis; regulation of granulocyte differentiation; response to vitamin A; retinol metabolic process; retinoic acid metabolic process	lipid binding; retinal binding; retinol binding; retinoid binding; all-trans-retinol binding	cytosol; cytoplasm; nucleoplasm; lipid droplet; cell body
HMGN3	1.83689e-16	-0.284821	0.967	0.989	6.7232e-12	chromatin organization; positive regulation of transcription by RNA polymerase II; regulation of insulin secretion involved in cellular response to glucose stimulus; regulation of transcription by RNA polymerase II; positive regulation of DNA-binding transcription factor activity	DNA binding; nucleosomal DNA binding; chromatin binding; thyroid hormone receptor binding	nucleus; cytosol; nucleoplasm; chromatin
PLAAT3	2.51118e-16	0.102861	0.114	0.022	9.19118e-12	lipid metabolic process; lipid catabolic process; triglyceride metabolic process; peroxisome organization; phospholipid biosynthetic process; response to bacterium; negative regulation of cell cycle; ether lipid metabolic process; regulation of adipose tissue development; phospholipid metabolic process; phosphatidylinositol acyl-chain remodeling; phosphatidylserine acyl-chain remodeling; phosphat…	transferase activity; hydrolase activity; protein binding; phospholipase A2 activity; phospholipase A1 activity; phospholipase A2 activity (consuming 1,2-dipalmitoylphosphatidylcholine); phospholipase A2 activity consuming 1,2-dioleoylphosphatidylethanolamine); N-acyltransferase activity; phosphatidylserine 1-acylhydrolase activity; 1-acyl-2-lysophosphatidylserine acylhydrolase activity	cytoplasm; membrane; integral component of membrane; plasma membrane; perinuclear region of cytoplasm; peroxisome; endoplasmic reticulum; peroxisomal membrane; cytosol
CRABP1	3.27965e-16	-0.286147	0.144	0.322	1.20038e-11	retinoic acid catabolic process; signal transduction; multicellular organism development	protein binding; lipid binding; retinoic acid binding; retinal binding; retinol binding; retinoid binding	cytoplasm; cytosol
SMS	3.90087e-16	0.353834	0.902	0.829	1.42776e-11	spermine biosynthetic process; polyamine biosynthetic process; polyamine metabolic process; methionine metabolic process; spermine metabolic process	transferase activity; spermine synthase activity	cytosol; extracellular exosome
RTN4	4.75912e-16	0.308971	0.99	0.98	1.74189e-11	apoptotic process; nervous system development; regulation of apoptotic process; protein localization to lysosome; endoplasmic reticulum tubular network organization; endoplasmic reticulum tubular network formation; protein stabilization; negative regulation of axonogenesis; positive regulation of toll-like receptor 9 signaling pathway; negative regulation of axon extension; axonal fasciculation; …	RNA binding; protein binding; cadherin binding; ubiquitin protein ligase binding	membrane; integral component of membrane; endoplasmic reticulum; endoplasmic reticulum membrane; plasma membrane; cell junction; integral component of endoplasmic reticulum membrane; nuclear envelope; endoplasmic reticulum tubular network membrane; endoplasmic reticulum tubular network; postsynaptic density; cell projection; neuronal cell body
SCRN1	6.1148e-16	-0.308994	0.569	0.727	2.23808e-11	exocytosis; proteolysis	protein binding; dipeptidase activity	nucleus; cytoplasm; nuclear membrane
TFAP2C	6.36919e-16	-0.189119	0.175	0.373	2.33119e-11	positive regulation of transcription by RNA polymerase II; regulation of transcription, DNA-templated; regulation of transcription by RNA polymerase II; male gonad development; cell-cell signaling; regulation of gene expression, epigenetic; negative regulation of transcription by RNA polymerase II	DNA binding; DNA-binding transcription factor activity; protein binding; DNA-binding transcription factor activity, RNA polymerase II-specific; RNA polymerase II regulatory region sequence-specific DNA binding; RNA polymerase II proximal promoter sequence-specific DNA binding; DNA-binding transcription repressor activity, RNA polymerase II-specific; DNA-binding transcription activator activity, R…	nucleus; nucleoplasm; mitochondrion; nuclear chromatin; cytosol
RCN2	9.43703e-16	0.27956	0.964	0.957	3.45405e-11		metal ion binding; calcium ion binding; protein binding	endoplasmic reticulum; nucleolus; endoplasmic reticulum lumen
PRKCB	1.27297e-15	-0.167754	0.083	0.241	4.65921e-11	lipoprotein transport; protein phosphorylation; phosphorylation; intracellular signal transduction; positive regulation of nucleic acid-templated transcription; chromatin organization; apoptotic process; immune system process; adaptive immune response; regulation of transcription by RNA polymerase II; positive regulation of I-kappaB kinase/NF-kappaB signaling; B cell activation; peptidyl-serine p…	zinc ion binding; metal ion binding; nucleotide binding; protein kinase activity; protein serine/threonine kinase activity; ATP binding; kinase activity; transferase activity; protein binding; protein kinase C activity; nuclear receptor transcription coactivator activity; chromatin binding; histone binding; androgen receptor binding; protein kinase C binding; histone kinase activity (H3-T6 specif…	nucleus; cytoplasm; membrane; cytosol; nucleoplasm; plasma membrane; extracellular exosome; calyx of Held; presynaptic cytosol; presynapse
HIST1H3B	1.37464e-15	-0.544088	0.496	0.623	5.03131e-11	nucleosome assembly; cellular protein metabolic process; regulation of gene silencing by miRNA; interleukin-7-mediated signaling pathway; regulation of megakaryocyte differentiation; DNA replication-dependent nucleosome assembly; blood coagulation; chromatin silencing at rDNA; negative regulation of gene expression, epigenetic; protein heterotetramerization; chromatin organization; telomere organ…	DNA binding; protein heterodimerization activity; protein binding; cadherin binding	nucleus; membrane; nucleosome; chromosome; extracellular region; nucleoplasm; extracellular exosome; protein-containing complex; nuclear chromosome; nuclear nucleosome
METRN	1.53866e-15	0.501391	0.793	0.726	5.63165e-11	signal transduction; multicellular organism development; cell differentiation; nervous system development; glial cell differentiation; positive regulation of axonogenesis	hormone activity	extracellular region; extracellular space
TPM1	1.86179e-15	0.488534	0.7	0.605	6.81434e-11	negative regulation of vascular smooth muscle cell proliferation; negative regulation of vascular associated smooth muscle cell migration; negative regulation of cell migration; cellular response to reactive oxygen species; regulation of cell shape; actin filament organization; ruffle organization; positive regulation of stress fiber assembly; muscle contraction; cardiac muscle contraction; ventr…	actin binding; protein homodimerization activity; protein binding; actin filament binding; identical protein binding; protein heterodimerization activity; cytoskeletal protein binding; structural constituent of muscle; structural constituent of cytoskeleton	cytoplasm; cytosol; actin cytoskeleton; cytoskeleton; actin filament; ruffle membrane; sarcomere; muscle thin filament tropomyosin; stress fiber; bleb; membrane; integral component of membrane
KCNQ3	2.26164e-15	-0.207191	0.119	0.289	8.27781e-11	transmembrane transport; ion transport; potassium ion transport; regulation of ion transmembrane transport; potassium ion transmembrane transport; chemical synaptic transmission; membrane hyperpolarization	ion channel activity; voltage-gated ion channel activity; voltage-gated potassium channel activity; potassium channel activity; delayed rectifier potassium channel activity; calmodulin binding; protein binding	membrane; integral component of membrane; voltage-gated potassium channel complex; plasma membrane; integral component of plasma membrane; cell surface; node of Ranvier; axon initial segment
TPBG	2.48857e-15	0.141901	0.147	0.041	9.1084e-11	cell adhesion; positive regulation of synapse assembly	protein binding	membrane; integral component of membrane; plasma membrane; cell surface; integral component of plasma membrane; cytoplasm; endoplasmic reticulum
SYNE2	3.52768e-15	-0.270811	0.971	0.992	1.29116e-10	cytoskeletal anchoring at nuclear membrane; positive regulation of cell migration; nuclear migration; centrosome localization; nuclear migration along microfilament; nucleokinesis involved in cell motility in cerebral cortex radial glia guided migration; regulation of cilium assembly	actin binding; actin filament binding; protein binding	nucleus; cytoplasm; membrane; integral component of membrane; mitochondrion; nuclear membrane; intermediate filament cytoskeleton; plasma membrane; cytoskeleton; aggresome; meiotic nuclear membrane microtubule tethering complex; cell junction; nucleoplasm; focal adhesion; nuclear envelope; extracellular exosome; sarcoplasmic reticulum; Z disc; sarcoplasmic reticulum membrane; filopodium membrane;…
CYYR1	4.05674e-15	0.225412	0.347	0.191	1.48481e-10			membrane; integral component of membrane
RAMP2	4.518e-15	-0.169651	0.134	0.308	1.65363e-10	intracellular protein transport; regulation of G protein-coupled receptor signaling pathway; protein transport; G protein-coupled receptor signaling pathway; response to hypoxia; sprouting angiogenesis; heart development; female pregnancy; regulation of blood pressure; positive regulation of gene expression; receptor internalization; response to estradiol; response to progesterone; cellular respo…	coreceptor activity; obsolete protein transporter activity; protein binding; amylin receptor activity; adrenomedullin receptor activity; adrenomedullin binding	cell; membrane; integral component of membrane; cytoplasm; plasma membrane; cell surface; receptor complex; lysosome; integral component of plasma membrane; clathrin-coated pit; amylin receptor complex 2; adrenomedullin receptor complex
ILDR2	5.15254e-15	0.207001	0.294	0.147	1.88588e-10	response to glucose; insulin secretion; cell differentiation; pancreas development; homeostasis of number of cells within a tissue		membrane; integral component of membrane; endoplasmic reticulum; endoplasmic reticulum membrane
DDR1	8.2279e-15	0.276772	0.666	0.537	3.01149e-10	collagen-activated tyrosine kinase receptor signaling pathway; protein phosphorylation; phosphorylation; transmembrane receptor protein tyrosine kinase signaling pathway; peptidyl-tyrosine phosphorylation; female pregnancy; cell adhesion; protein autophosphorylation; extracellular matrix organization; wound healing, spreading of cells; lactation; peptidyl-tyrosine autophosphorylation; regulation …	protein tyrosine kinase collagen receptor activity; metal ion binding; nucleotide binding; protein kinase activity; ATP binding; kinase activity; transferase activity; protein tyrosine kinase activity; transmembrane receptor protein tyrosine kinase activity; protein binding; collagen binding	integral component of plasma membrane; membrane; integral component of membrane; extracellular space; plasma membrane; extracellular region; receptor complex; extracellular exosome
GAREM1	9.09291e-15	0.176378	0.235	0.101	3.3281e-10	positive regulation of cell division; positive regulation of ERK1 and ERK2 cascade; positive regulation of cell population proliferation; epidermal growth factor receptor signaling pathway; cellular response to epidermal growth factor stimulus	protein binding; proline-rich region binding	plasma membrane
FAM171B	1.12336e-14	-0.347518	0.586	0.719	4.11162e-10			membrane; integral component of membrane
PDCD4	1.15658e-14	-0.291853	0.556	0.703	4.23319e-10	positive regulation of endothelial cell apoptotic process; negative regulation of vascular smooth muscle cell proliferation; positive regulation of inflammatory response; negative regulation of cytokine production involved in inflammatory response; negative regulation of vascular smooth muscle cell differentiation; positive regulation of vascular associated smooth muscle cell apoptotic process; B…	RNA binding; protein binding	nucleus; cytoplasm; cytosol
MSI2	1.20574e-14	0.311987	0.763	0.68	4.41311e-10	stem cell development	nucleic acid binding; RNA binding; protein binding; single-stranded RNA binding; poly(U) RNA binding	cytoplasm; nucleus; ribonucleoprotein complex; polysome
PRSS23	1.6503e-14	0.174961	0.219	0.092	6.04026e-10	proteolysis; cellular protein metabolic process; post-translational protein modification	hydrolase activity; peptidase activity; serine-type endopeptidase activity; serine-type peptidase activity	extracellular region; extracellular exosome; endoplasmic reticulum lumen; nucleus
PTX3	1.85441e-14	0.217524	0.261	0.12	6.78732e-10	innate immune response; neutrophil degranulation; inflammatory response; negative regulation of viral entry into host cell; negative regulation by host of viral exo-alpha-sialidase activity; negative regulation by host of viral glycoprotein metabolic process; negative regulation of exo-alpha-sialidase activity; negative regulation of glycoprotein metabolic process; ovarian cumulus expansion; resp…	protein binding; identical protein binding; complement component C1q binding; virion binding; (1->3)-beta-D-glucan binding	extracellular space; extracellular region; specific granule lumen; tertiary granule lumen; extracellular matrix
TBC1D1	1.8547e-14	-0.230938	0.388	0.566	6.78838e-10	intracellular protein transport; activation of GTPase activity; membrane organization; regulation of protein localization	GTPase activator activity; Rab GTPase binding; protein binding	nucleus; cytosol
NTM	2.43016e-14	0.222022	0.243	0.109	8.89463e-10	cell adhesion; neuron recognition	protein binding	membrane; plasma membrane; extracellular region; anchored component of membrane
SYNM	3.11081e-14	0.180148	0.166	0.057	1.13859e-09	intermediate filament cytoskeleton organization; fast-twitch skeletal muscle fiber contraction	structural constituent of cytoskeleton; structural constituent of muscle; protein binding; vinculin binding; intermediate filament binding	intermediate filament; cytoplasm; cytoskeleton; cell junction; adherens junction; membrane; sarcolemma; costamere; neurofilament cytoskeleton
QPRT	3.15216e-14	-0.232574	0.292	0.472	1.15372e-09	NAD biosynthetic process; quinolinate catabolic process; pyridine nucleotide biosynthetic process; protein complex oligomerization; NAD metabolic process; quinolinate metabolic process	catalytic activity; nicotinate-nucleotide diphosphorylase (carboxylating) activity; transferase activity, transferring pentosyl groups; transferase activity; transferase activity, transferring glycosyl groups; protein homodimerization activity; protein binding	cytoplasm; cytosol; extracellular exosome
HIST1H2AG	3.42613e-14	-0.445846	0.442	0.577	1.254e-09	chromatin organization	DNA binding; protein heterodimerization activity; protein binding; enzyme binding	nucleus; nucleosome; chromosome; nuclear chromatin; extracellular exosome
AMBN	3.76948e-14	-0.175871	0.07	0.213	1.37967e-09	signal transduction; odontogenesis of dentin-containing tooth; biomineral tissue development; cellular protein metabolic process; post-translational protein modification; cell adhesion; regulation of cell population proliferation	protein binding; structural constituent of tooth enamel; growth factor activity	extracellular region; endoplasmic reticulum lumen
GPC3	4.86938e-14	0.280165	0.299	0.158	1.78224e-09	regulation of signal transduction; negative regulation of peptidase activity; cellular protein metabolic process; cell migration; post-translational protein modification; positive regulation of canonical Wnt signaling pathway; anatomical structure morphogenesis; retinoid metabolic process; glycosaminoglycan biosynthetic process; glycosaminoglycan catabolic process; positive regulation of endocyto…	protein binding; peptidase inhibitor activity; peptidyl-dipeptidase inhibitor activity	membrane; plasma membrane; collagen-containing extracellular matrix; anchored component of membrane; anchored component of plasma membrane; cell surface; extracellular region; intrinsic component of plasma membrane; endoplasmic reticulum lumen; lysosomal lumen; Golgi lumen; lysosome
TIMP3	5.20011e-14	-0.17093	0.036	0.154	1.90329e-09	negative regulation of ERK1 and ERK2 cascade; negative regulation of metalloendopeptidase activity; response to stimulus; negative regulation of peptidase activity; visual perception; negative regulation of endopeptidase activity; platelet degranulation; response to organic substance; response to hormone; response to cytokine; negative regulation of membrane protein ectodomain proteolysis; cellul…	metal ion binding; protein binding; metalloendopeptidase inhibitor activity; peptidase inhibitor activity; protease binding; enzyme inhibitor activity	nucleus; extracellular region; extracellular space; extracellular matrix; collagen-containing extracellular matrix; platelet dense granule lumen; basement membrane
EML1	5.40512e-14	-0.202913	0.217	0.391	1.97833e-09	microtubule cytoskeleton organization; mitotic spindle organization; neuroblast proliferation; brain development; hematopoietic progenitor cell differentiation	protein binding; calcium ion binding; microtubule binding; tubulin binding	cytoplasm; cytosol; cytoskeleton; perinuclear region of cytoplasm; microtubule; microtubule cytoskeleton; mitotic spindle; mitotic spindle pole; mitotic spindle midzone; microtubule associated complex
NRP2	5.47081e-14	0.197677	0.189	0.073	2.00237e-09	positive regulation of endothelial cell migration; cell adhesion; axon guidance; multicellular organism development; cell differentiation; angiogenesis; nervous system development; viral process; vascular endothelial growth factor signaling pathway; positive regulation of endothelial cell proliferation; vascular endothelial growth factor receptor signaling pathway; outflow tract septum morphogene…	metal ion binding; protein binding; semaphorin receptor activity; vascular endothelial growth factor-activated receptor activity; heparin binding; signaling receptor activity; growth factor binding; cytokine binding	membrane; integral component of membrane; extracellular region; plasma membrane; semaphorin receptor complex; axon; glutamatergic synapse; integral component of postsynaptic membrane
LMO3	5.55294e-14	-0.207514	0.086	0.231	2.03243e-09	negative regulation of ERK1 and ERK2 cascade; positive regulation of fat cell differentiation; positive regulation of peroxisome proliferator activated receptor signaling pathway; positive regulation of glucocorticoid receptor signaling pathway	metal ion binding; protein binding	cytoplasm
ITGA6	5.70334e-14	0.256675	0.432	0.276	2.08748e-09	cell adhesion; integrin-mediated signaling pathway; positive regulation of cell migration; positive regulation of transcription by RNA polymerase II; leukocyte migration; positive regulation of GTPase activity; extracellular matrix organization; positive regulation of phosphorylation; positive regulation of neuron projection development; cell-substrate adhesion; renal system development; skin dev…	metal ion binding; protein binding; cadherin binding; insulin-like growth factor I binding; neuregulin binding; laminin binding; protein-containing complex binding	membrane; integrin complex; integral component of membrane; plasma membrane; cell surface; focal adhesion; basement membrane; cell-cell adherens junction; external side of plasma membrane; basal plasma membrane; basolateral plasma membrane; hemidesmosome; filopodium; integrin alpha6-beta4 complex; basal part of cell
AUTS2	6.46958e-14	-0.301435	0.558	0.712	2.36793e-09	positive regulation of transcription by RNA polymerase II; positive regulation of lamellipodium assembly; actin cytoskeleton reorganization; neuron migration; axon extension; dendrite extension; positive regulation of Rac protein signal transduction; positive regulation of histone H3-K4 methylation; positive regulation of histone H4-K16 acetylation	protein binding; chromatin binding	nucleus; cytoplasm; cytoskeleton; cell projection; growth cone; actin cytoskeleton
SEPTIN7	7.38371e-14	0.333528	0.992	0.995	2.70251e-09	negative regulation of cell migration; negative regulation of G1/S transition of mitotic cell cycle; positive regulation of apoptotic process; cell division; cell cycle; cell differentiation; spermatogenesis; cilium assembly; protein heterooligomerization; cytoskeleton-dependent cytokinesis; regulation of embryonic cell shape; positive regulation of non-motile cilium assembly	nucleotide binding; GTP binding; protein binding; identical protein binding; cadherin binding; GTPase activity; structural molecule activity	nucleus; cytoplasm; motile cilium; chromosome; cytoskeleton; cell projection; septin complex; spindle; midbody; chromosome, centromeric region; kinetochore; condensed chromosome kinetochore; cilium; cytosol; extracellular exosome; stress fiber; axoneme; non-motile cilium; cleavage furrow; microtubule cytoskeleton; apical plasma membrane; septin ring; sperm annulus
NAV1	7.55695e-14	0.318293	0.471	0.322	2.76592e-09	neurogenesis; multicellular organism development; cell differentiation; nervous system development; microtubule bundle formation; neuron migration		cytoplasm; cytoskeleton; microtubule; microtubule cytoskeleton; axon initial segment
HDAC9	7.61095e-14	-0.236589	0.29	0.47	2.78568e-09	positive regulation of cell migration involved in sprouting angiogenesis; cholesterol homeostasis; cellular response to insulin stimulus; chromatin organization; inflammatory response; histone deacetylation; B cell activation; negative regulation of transcription by RNA polymerase II; negative regulation of transcription, DNA-templated; heart development; B cell differentiation; negative regulati…	metal ion binding; hydrolase activity; protein binding; histone deacetylase activity; NAD-dependent histone deacetylase activity (H3-K14 specific); transcription factor binding; transcription corepressor activity; histone deacetylase binding; protein kinase C binding; repressing transcription factor binding; protein deacetylase activity; histone deacetylase activity (H4-K16 specific)	cytoplasm; nucleus; nucleoplasm; histone deacetylase complex; transcription factor complex; histone methyltransferase complex
YBX1	1.04139e-13	0.153215	1	0.998	3.8116e-09	mRNA processing; RNA splicing; positive regulation of cell division; positive regulation of transcription by RNA polymerase II; regulation of transcription, DNA-templated; transcription by RNA polymerase II; protein localization to cytoplasmic stress granule; mRNA splicing, via spliceosome; CRD-mediated mRNA stabilization; Notch signaling pathway	nucleic acid binding; RNA binding; DNA binding; protein binding; DNA-binding transcription factor activity, RNA polymerase II-specific; RNA polymerase II proximal promoter sequence-specific DNA binding; DNA-binding transcription activator activity, RNA polymerase II-specific; DNA-binding transcription factor activity; GTPase binding; double-stranded DNA binding; single-stranded DNA binding	nucleus; cytoplasm; intracellular membrane-bounded organelle; cytosol; nuclear membrane; extracellular region; nucleoplasm; extracellular exosome; ribonucleoprotein complex; cytoplasmic stress granule; CRD-mediated mRNA stability complex; histone pre-mRNA 3'end processing complex; U12-type spliceosomal complex
PPA1	1.14433e-13	-0.262928	0.909	0.945	4.18838e-09	phosphate-containing compound metabolic process; tRNA aminoacylation for protein translation; diphosphate metabolic process	metal ion binding; magnesium ion binding; hydrolase activity; inorganic diphosphatase activity; pyrophosphatase activity	cytoplasm; cytosol; extracellular exosome
CARMIL1	1.58717e-13	-0.172862	0.098	0.243	5.8092e-09	positive regulation of cell migration; barbed-end actin filament uncapping; positive regulation of lamellipodium organization; negative regulation of barbed-end actin filament capping; urate metabolic process; ruffle organization; positive regulation of actin filament polymerization; positive regulation of stress fiber assembly; blood coagulation; cell migration; actin filament organization; acti…	protein binding; protein-containing complex binding	lamellipodium; cytoplasm; nuclear speck; membrane; nucleus; cytosol; plasma membrane; cytoskeleton; cell projection; cell leading edge; extracellular exosome; filamentous actin; macropinosome
POU3F2	1.78318e-13	0.314457	0.657	0.512	6.52662e-09	regulation of transcription, DNA-templated; regulation of transcription by RNA polymerase II; cell differentiation; brain development; nervous system development; neuron development; neuron fate specification; neuron differentiation; positive regulation of cell population proliferation; epidermis development; negative regulation of gene expression; astrocyte development; Schwann cell development;…	DNA binding; DNA-binding transcription factor activity; sequence-specific DNA binding; protein binding; identical protein binding; DNA-binding transcription factor activity, RNA polymerase II-specific; RNA polymerase II proximal promoter sequence-specific DNA binding; DNA-binding transcription activator activity, RNA polymerase II-specific; transcription coactivator activity	nucleus; nuclear chromatin; transcription factor complex
NKAIN4	1.92651e-13	0.288361	0.67	0.53	7.0512e-09	regulation of sodium ion transport		membrane; integral component of membrane; plasma membrane
HES1	1.93979e-13	-0.397712	0.644	0.755	7.09983e-09	positive regulation of cell population proliferation; positive regulation of transcription by RNA polymerase II; ventricular septum morphogenesis; outflow tract morphogenesis; regulation of transcription, DNA-templated; Notch signaling pathway; cell differentiation; negative regulation of transcription by RNA polymerase II; anterior/posterior pattern specification; regulation of neurogenesis; ner…	protein dimerization activity; DNA binding; DNA-binding transcription factor activity; protein homodimerization activity; protein binding; sequence-specific DNA binding; RNA polymerase II regulatory region sequence-specific DNA binding; DNA-binding transcription factor activity, RNA polymerase II-specific; DNA-binding transcription repressor activity, RNA polymerase II-specific; transcription fac…	nucleus; nucleoplasm; cytoplasm
PFN2	1.94265e-13	0.308694	0.905	0.858	7.1103e-09	actin cytoskeleton organization; regulation of actin filament polymerization; positive regulation of peptidyl-serine phosphorylation; protein stabilization; positive regulation of actin filament polymerization; positive regulation of stress fiber assembly; positive regulation of ATPase activity; negative regulation of actin filament polymerization; positive regulation of actin filament bundle ass…	actin binding; protein binding; ATPase activity; actin monomer binding; phosphatidylinositol-4,5-bisphosphate binding	cytoplasm; cytoskeleton; extracellular exosome; Schaffer collateral - CA1 synapse; presynapse; postsynapse; glutamatergic synapse; membrane; integral component of membrane
SCRG1	2.28908e-13	0.408902	0.383	0.237	8.37827e-09	nervous system development; mesenchymal stem cell proliferation	protein binding	extracellular region; Golgi apparatus; extracellular space; cytoplasm; neuron projection terminus
ALKBH2	2.37178e-13	-0.175585	0.15	0.311	8.68095e-09	oxidation-reduction process; DNA repair; cellular response to DNA damage stimulus; oxidative demethylation; DNA dealkylation involved in DNA repair; oxidative DNA demethylation; DNA demethylation	metal ion binding; oxidoreductase activity; dioxygenase activity; ferrous iron binding; 1-ethyladenine demethylase activity; DNA-N1-methyladenine dioxygenase activity; cytosine C-5 DNA demethylase activity; 2-oxoglutarate-dependent dioxygenase activity	nucleus; nucleoplasm; microtubule cytoskeleton
HIST1H2BC	2.5654e-13	-0.219584	0.121	0.268	9.38961e-09	nucleosome assembly; defense response to bacterium; protein ubiquitination; innate immune response in mucosa; antibacterial humoral response; defense response to Gram-positive bacterium; antimicrobial humoral immune response mediated by antimicrobial peptide	DNA binding; protein heterodimerization activity; protein binding; identical protein binding	nucleus; cytosol; nucleoplasm; nucleosome; chromosome; extracellular space; extracellular exosome
DSTN	2.77323e-13	-0.295958	0.83	0.909	1.01503e-08	actin filament severing; actin filament depolymerization; positive regulation of actin filament depolymerization; actin polymerization or depolymerization; actin filament fragmentation	actin binding; protein binding; actin filament binding	actin cytoskeleton; extracellular exosome; cytoplasm; cortical actin cytoskeleton; intracellular
MARCKSL1	3.13576e-13	0.221971	0.997	0.994	1.14772e-08	positive regulation of cell population proliferation	actin binding; protein binding; calmodulin binding	cytoplasm; membrane; plasma membrane; cytoskeleton; extracellular exosome
EXOC6	3.4643e-13	0.238729	0.504	0.356	1.26797e-08	vesicle docking involved in exocytosis; protein transport; exocytosis; Golgi to plasma membrane transport	protein binding	exocyst; cytoplasm; cell projection; perinuclear region of cytoplasm; plasma membrane; cytosol; growth cone; Flemming body
PANTR1	3.87857e-13	0.278949	0.962	0.94	1.4196e-08
SMOC1	4.55199e-13	0.183066	0.104	0.024	1.66608e-08	multicellular organism development; cell differentiation; eye development; limb development; regulation of osteoblast differentiation	metal ion binding; calcium ion binding; protein binding; extracellular matrix binding	extracellular region; basement membrane
CDC42BPA	6.05926e-13	0.269642	0.401	0.25	2.21775e-08	protein phosphorylation; phosphorylation; intracellular signal transduction; actin cytoskeleton organization; actomyosin structure organization; cell migration; peptidyl-threonine phosphorylation; actin cytoskeleton reorganization	metal ion binding; nucleotide binding; protein kinase activity; protein serine/threonine kinase activity; ATP binding; kinase activity; transferase activity; protein binding; magnesium ion binding; identical protein binding	cytoplasm; cell projection; lamellipodium; cell leading edge; extracellular exosome; cytoskeleton; cell-cell junction; actomyosin
CELSR1	7.7514e-13	-0.179544	0.147	0.304	2.83709e-08	G protein-coupled receptor signaling pathway; cell adhesion; homophilic cell adhesion via plasma membrane adhesion molecules; signal transduction; cell surface receptor signaling pathway; multicellular organism development; cell-cell adhesion; Wnt signaling pathway, planar cell polarity pathway; neural tube closure; central nervous system development; establishment of planar polarity; neuron migr…	G protein-coupled receptor activity; calcium ion binding; transmembrane signaling receptor activity; protein dimerization activity	membrane; integral component of membrane; nucleoplasm; plasma membrane; integral component of plasma membrane
DYNLL1	1.20673e-12	0.250777	1	0.997	4.41675e-08	regulation of catalytic activity; apoptotic process; microtubule-based process; intraciliary transport involved in cilium assembly; viral process; G2/M transition of mitotic cell cycle; regulation of G2/M transition of mitotic cell cycle; ciliary basal body-plasma membrane docking; neutrophil degranulation; substantia nigra development; antigen processing and presentation of exogenous peptide ant…	motor activity; protein binding; dynein light intermediate chain binding; ATP-dependent microtubule motor activity, plus-end-directed; dynein intermediate chain binding	nucleus; cytoplasm; membrane; mitochondrion; cytoskeleton; microtubule; centrosome; microtubule organizing center; dynein complex; plasma membrane; kinetochore; cytoplasmic dynein complex; cilium; ciliary tip; cytosol; COP9 signalosome; tertiary granule membrane; mitotic spindle; ficolin-1-rich granule membrane; microtubule associated complex
IGFBP5	1.36631e-12	-0.132519	0.046	0.163	5.00082e-08	positive regulation of vascular smooth muscle cell proliferation; positive regulation of vascular associated smooth muscle cell migration; negative regulation of insulin-like growth factor receptor signaling pathway; negative regulation of cell migration; negative regulation of smooth muscle cell proliferation; regulation of cell growth; osteoblast differentiation; female pregnancy; aging; hair f…	protein binding; insulin-like growth factor binding; fibronectin binding; growth factor binding; insulin-like growth factor I binding; insulin-like growth factor II binding	extracellular region; extracellular space; endoplasmic reticulum lumen; insulin-like growth factor binding protein complex; insulin-like growth factor ternary complex
LIFR	1.61366e-12	0.310573	0.524	0.386	5.90616e-08	positive regulation of cell population proliferation; cell surface receptor signaling pathway; cytokine-mediated signaling pathway; regulation of cytokine-mediated signaling pathway; response to cytokine; ciliary neurotrophic factor-mediated signaling pathway; oncostatin-M-mediated signaling pathway; leukemia inhibitory factor signaling pathway	protein binding; cytokine receptor activity; growth factor binding; ciliary neurotrophic factor receptor binding; cytokine binding; ciliary neurotrophic factor receptor activity; leukemia inhibitory factor receptor activity; oncostatin-M receptor activity	membrane; integral component of membrane; plasma membrane; extracellular region; external side of plasma membrane; receptor complex; extracellular exosome; integral component of plasma membrane
S100A13	1.63678e-12	0.16792	0.238	0.114	5.99077e-08	protein transport; positive regulation of I-kappaB kinase/NF-kappaB signaling; cytokine secretion; mast cell degranulation; interleukin-1 alpha secretion; positive regulation of cell population proliferation; regulation of cell shape; response to copper ion; response to electrical stimulus	metal ion binding; calcium ion binding; zinc ion binding; protein homodimerization activity; protein binding; lipid binding; copper ion binding; RAGE receptor binding; fibroblast growth factor binding	nucleus; cytoplasm; nucleolus; cytosol; plasma membrane; extracellular space; extracellular region; perinuclear region of cytoplasm; mast cell granule
TPD52	1.69554e-12	-0.13609	0.069	0.194	6.20586e-08	anatomical structure morphogenesis; B cell differentiation; secretion	protein homodimerization activity; protein binding; calcium ion binding; protein heterodimerization activity	cytoplasm; endoplasmic reticulum; perinuclear region of cytoplasm
RAMP1	2.50419e-12	-0.147622	0.065	0.191	9.16559e-08	intracellular protein transport; regulation of G protein-coupled receptor signaling pathway; protein transport; G protein-coupled receptor signaling pathway; calcium ion transport; angiogenesis; adenylate cyclase-activating G protein-coupled receptor signaling pathway; protein localization to plasma membrane; cellular response to hormone stimulus; receptor internalization; positive regulation of …	coreceptor activity; obsolete protein transporter activity; protein binding; amylin receptor activity; calcitonin gene-related peptide receptor activity; calcitonin gene-related peptide binding	cell; membrane; integral component of membrane; plasma membrane; cell surface; receptor complex; integral component of plasma membrane; extracellular space; amylin receptor complex 1; CGRP receptor complex
MT-CO2	2.63291e-12	0.188079	0.998	1	9.6367e-08	oxidation-reduction process; electron transport chain; proton transmembrane transport; mitochondrial electron transport, cytochrome c to oxygen; lactation; response to cold; positive regulation of hydrogen peroxide biosynthetic process; positive regulation of necrotic cell death; ATP synthesis coupled electron transport; positive regulation of ATP biosynthetic process	metal ion binding; oxidoreductase activity; protein binding; cytochrome-c oxidase activity; copper ion binding	membrane; integral component of membrane; mitochondrial inner membrane; mitochondrion; respirasome; respiratory chain complex IV
TMEM54	3.12557e-12	-0.171301	0.127	0.273	1.14399e-07			membrane; integral component of membrane
EEF1A2	3.37602e-12	-0.238737	0.594	0.736	1.23566e-07	translation; translational elongation; regulation of chaperone-mediated autophagy; response to inorganic substance; positive regulation of apoptotic process; response to electrical stimulus; positive regulation of lipid kinase activity	nucleotide binding; GTPase activity; GTP binding; protein binding; translation elongation factor activity; protein kinase binding; translation factor activity, RNA binding	cytoplasm; cytoplasmic side of lysosomal membrane; eukaryotic translation elongation factor 1 complex; neuronal cell body; synapse
MALAT1	3.68016e-12	-0.190478	1	0.999	1.34697e-07
RPS24	3.89465e-12	-0.170137	1	1	1.42548e-07	translation; rRNA processing; ribosomal small subunit biogenesis; viral transcription; translational initiation; nuclear-transcribed mRNA catabolic process, nonsense-mediated decay; SRP-dependent cotranslational protein targeting to membrane; erythrocyte homeostasis	structural constituent of ribosome; RNA binding; translation initiation factor binding	ribosome; intracellular; nucleus; membrane; cytosolic small ribosomal subunit; nucleoplasm; cytosol; small ribosomal subunit
CHST7	4.09508e-12	0.144746	0.194	0.084	1.49884e-07	carbohydrate metabolic process; chondroitin sulfate biosynthetic process; N-acetylglucosamine metabolic process; sulfur compound metabolic process; polysaccharide metabolic process	transferase activity; sulfotransferase activity; N-acetylglucosamine 6-O-sulfotransferase activity; chondroitin 6-sulfotransferase activity	membrane; integral component of membrane; Golgi apparatus; Golgi membrane; trans-Golgi network
FEZF2	4.12082e-12	-0.169619	0.303	0.493	1.50826e-07	multicellular organism development; cell differentiation; positive regulation of transcription by RNA polymerase II; nervous system development; positive regulation of transcription, DNA-templated; negative regulation of transcription by RNA polymerase II; axonal fasciculation; locomotory behavior; negative regulation of cell population proliferation; dendrite development; telencephalon developme…	nucleic acid binding; metal ion binding; DNA binding; DNA-binding transcription factor activity; sequence-specific DNA binding; RNA polymerase II regulatory region sequence-specific DNA binding; chromatin DNA binding; RNA polymerase II proximal promoter sequence-specific DNA binding; DNA-binding transcription repressor activity, RNA polymerase II-specific; DNA-binding transcription activator acti…	nucleus
IL33	4.12994e-12	-0.154745	0.031	0.135	1.5116e-07	positive regulation of inflammatory response; positive regulation of transcription by RNA polymerase II; positive regulation of neuroinflammatory response; positive regulation of macrophage activation; protein deubiquitination; macrophage activation involved in immune response; microglial cell activation involved in immune response; negative regulation of leukocyte migration; negative regulation …	protein binding; cytokine activity	nucleus; chromosome; extracellular space; extracellular region; cytoplasmic vesicle; nucleoplasm; transport vesicle
TPI1	5.21905e-12	-0.226624	0.987	0.995	1.91022e-07	glycolytic process; gluconeogenesis; canonical glycolysis; glyceraldehyde-3-phosphate biosynthetic process; glucose metabolic process; multicellular organism development; methylglyoxal biosynthetic process; glycerol catabolic process; glyceraldehyde-3-phosphate metabolic process	isomerase activity; catalytic activity; lyase activity; protein homodimerization activity; protein binding; ubiquitin protein ligase binding; triose-phosphate isomerase activity; methylglyoxal synthase activity	nucleus; cytoplasm; extracellular space; cytosol; extracellular exosome
PAPPA	5.24711e-12	0.105526	0.129	0.04	1.92049e-07	proteolysis; cellular protein metabolic process; female pregnancy; response to follicle-stimulating hormone; response to glucocorticoid	metal ion binding; hydrolase activity; zinc ion binding; peptidase activity; metalloendopeptidase activity; metallopeptidase activity; endopeptidase activity	extracellular region; extracellular space
EPS8	5.31615e-12	0.21391	0.419	0.274	1.94576e-07	positive regulation of signal transduction; barbed-end actin filament capping; actin filament bundle assembly; Rho protein signal transduction; regulation of cell shape; exit from mitosis; actin polymerization-dependent cell motility; regulation of actin filament length; Rac protein signal transduction; regulation of Rho protein signal transduction; dendritic cell migration; actin crosslink forma…	actin binding; signaling adaptor activity; protein binding; Rac GTPase binding; Rac guanyl-nucleotide exchange factor activity	cytoplasm; membrane; plasma membrane; cell projection; cell junction; synapse; growth cone; extracellular exosome; cell cortex; ruffle membrane; stereocilium; neuron projection; vesicle; brush border; postsynaptic density; NMDA selective glutamate receptor complex; stereocilium bundle; stereocilium tip; glutamatergic synapse
PAPPA2	5.51073e-12	-0.10533	0.026	0.125	2.01698e-07	proteolysis; cellular protein metabolic process; regulation of cell growth; response to salt stress; bone morphogenesis	zinc ion binding; metal ion binding; hydrolase activity; peptidase activity; metallopeptidase activity; protein binding	extracellular region; extracellular exosome; cytosol; apical plasma membrane
HSPB1	6.18609e-12	-0.323407	0.824	0.889	2.26417e-07	positive regulation of blood vessel endothelial cell migration; positive regulation of angiogenesis; cellular response to vascular endothelial growth factor stimulus; negative regulation of protein kinase activity; negative regulation of apoptotic process; negative regulation of protein serine/threonine kinase activity; response to unfolded protein; retina homeostasis; regulation of mRNA stabilit…	RNA binding; protein homodimerization activity; protein binding; identical protein binding; protein kinase binding; ubiquitin binding; protein folding chaperone; protein kinase C binding; protein kinase C inhibitor activity	nucleus; cytoplasm; extracellular space; axon cytoplasm; cytoskeleton; focal adhesion; spindle; cytosol; extracellular exosome; proteasome complex; plasma membrane; Z disc; contractile fiber
DUSP23	6.4811e-12	-0.111355	0.055	0.171	2.37215e-07	protein dephosphorylation; dephosphorylation; peptidyl-tyrosine dephosphorylation	hydrolase activity; phosphoprotein phosphatase activity; protein binding; protein tyrosine phosphatase activity; phosphatase activity; protein tyrosine/serine/threonine phosphatase activity	nucleus; cytoplasm; nucleoplasm; cytosol
RPL36A	6.83657e-12	-0.205911	0.998	0.998	2.50225e-07	translation; cytoplasmic translation; viral transcription; translational initiation; nuclear-transcribed mRNA catabolic process, nonsense-mediated decay; SRP-dependent cotranslational protein targeting to membrane	structural constituent of ribosome; RNA binding; protein binding	endoplasmic reticulum; cytosol; ribosome; plasma membrane; intracellular; cytoplasm; cytosolic large ribosomal subunit; polysomal ribosome
TIFA	7.13282e-12	-0.1802	0.261	0.432	2.61068e-07	I-kappaB kinase/NF-kappaB signaling; immune system process; innate immune response; protein homooligomerization; positive regulation of I-kappaB kinase/NF-kappaB signaling; cytoplasmic pattern recognition receptor signaling pathway	protein binding	cytoplasm
SFRP2	7.50439e-12	0.345061	0.418	0.272	2.74668e-07	positive regulation of angiogenesis; negative regulation of cell population proliferation; positive regulation of apoptotic process; positive regulation of transcription by RNA polymerase II; outflow tract morphogenesis; positive regulation of canonical Wnt signaling pathway; multicellular organism development; Wnt signaling pathway; cell differentiation; branching involved in blood vessel morpho…	enzyme activator activity; Wnt-protein binding; receptor ligand activity; endopeptidase activator activity; integrin binding; fibronectin binding; protein binding	extracellular space; extracellular region; collagen-containing extracellular matrix
ADGRL2	8.35694e-12	0.213374	0.395	0.251	3.05872e-07	G protein-coupled receptor signaling pathway; signal transduction; cell surface receptor signaling pathway; adenylate cyclase-activating G protein-coupled receptor signaling pathway; brain development	G protein-coupled receptor activity; carbohydrate binding; transmembrane signaling receptor activity; latrotoxin receptor activity	membrane; integral component of membrane; integral component of plasma membrane; neuron projection
TLE1	8.64663e-12	0.390175	0.736	0.656	3.16475e-07	regulation of transcription, DNA-templated; Wnt signaling pathway; negative regulation of canonical Wnt signaling pathway; positive regulation of gene expression; negative regulation of Wnt signaling pathway; signal transduction; multicellular organism development; negative regulation of transcription, DNA-templated; beta-catenin-TCF complex assembly; animal organ morphogenesis; negative regulati…	protein binding; identical protein binding; transcription corepressor activity; repressing transcription factor binding; transcription factor binding	nucleus; nucleoplasm; cytosol; transcription factor complex; beta-catenin-TCF complex
SLF1	8.75583e-12	-0.231753	0.591	0.747	3.20472e-07	DNA repair; cellular response to DNA damage stimulus; positive regulation of double-strand break repair; positive regulation of protein complex assembly; positive regulation of maintenance of mitotic sister chromatid cohesion; protein localization to site of double-strand break	protein binding; ubiquitin protein ligase binding; protein-containing complex binding	nucleus; cytoplasm; nucleosome; cytoskeleton; centrosome; microtubule organizing center; site of double-strand break; nuclear inclusion body
KREMEN1	9.10201e-12	0.164811	0.176	0.073	3.33143e-07	apoptotic process; Wnt signaling pathway; negative regulation of canonical Wnt signaling pathway; cell communication; regulation of canonical Wnt signaling pathway; limb development; negative regulation of ossification; negative regulation of axon regeneration	protein binding	membrane; integral component of membrane; plasma membrane; neuronal cell body
AP1S2	1.03631e-11	0.340202	0.545	0.427	3.793e-07	intracellular protein transport; vesicle-mediated transport; protein transport; antigen processing and presentation of exogenous peptide antigen via MHC class II; regulation of defense response to virus by virus	protein binding	membrane coat; membrane; Golgi apparatus; intracellular membrane-bounded organelle; cytoplasmic vesicle; cytoplasmic vesicle membrane; clathrin-coated pit; cytosol; trans-Golgi network membrane; Golgi membrane; lysosomal membrane; AP-type membrane coat adaptor complex
FZD8	1.06164e-11	-0.304456	0.444	0.585	3.8857e-07	signal transduction; cell surface receptor signaling pathway; G protein-coupled receptor signaling pathway; multicellular organism development; Wnt signaling pathway; canonical Wnt signaling pathway; non-canonical Wnt signaling pathway; neuron differentiation; angiogenesis; positive regulation of protein phosphorylation; T cell differentiation in thymus; positive regulation of JUN kinase activity	protein binding; transmembrane signaling receptor activity; G protein-coupled receptor activity; Wnt-protein binding; Wnt-activated receptor activity; ubiquitin protein ligase binding; PDZ domain binding; signaling receptor binding	membrane; integral component of membrane; Golgi apparatus; plasma membrane; Wnt-Frizzled-LRP5/6 complex
RPS26	1.13412e-11	-0.171322	0.995	1	4.15099e-07	translation; cytoplasmic translation; viral transcription; translational initiation; nuclear-transcribed mRNA catabolic process, nonsense-mediated decay; SRP-dependent cotranslational protein targeting to membrane; negative regulation of RNA splicing	RNA binding; structural constituent of ribosome; protein binding; mRNA binding; cadherin binding	cytoplasm; membrane; endoplasmic reticulum; ribosome; cytosol; cytosolic small ribosomal subunit; nucleoplasm; extracellular exosome; rough endoplasmic reticulum; cytoplasmic side of rough endoplasmic reticulum membrane; small ribosomal subunit; polysomal ribosome; intracellular
HIST1H1E	1.13741e-11	-0.440987	0.498	0.625	4.16303e-07	nucleosome assembly; regulation of transcription, DNA-templated; negative regulation of transcription by RNA polymerase II; regulation of transcription by RNA polymerase II; nucleosome positioning; histone H3-K4 trimethylation; histone H3-K27 trimethylation; negative regulation of DNA recombination; chromosome condensation; negative regulation of chromatin silencing	RNA binding; DNA binding; chromatin DNA binding; protein binding; nucleotide binding; double-stranded DNA binding; calcium ion binding; ATP binding; GTP binding; AMP binding; dATP binding; ADP binding; nucleosomal DNA binding	nucleus; nucleosome; chromosome; nuclear chromatin; nuclear nucleosome; nuclear heterochromatin; nuclear euchromatin
HIST1H1D	1.20671e-11	-0.888182	0.537	0.622	4.41668e-07	nucleosome assembly; regulation of transcription, DNA-templated; negative regulation of DNA recombination; nucleosome positioning; chromosome condensation; negative regulation of chromatin silencing; negative regulation of transcription by RNA polymerase II; regulation of transcription by RNA polymerase II; histone H3-K4 trimethylation; histone H3-K27 trimethylation	RNA binding; DNA binding; chromatin DNA binding; double-stranded DNA binding; nucleosomal DNA binding	nucleus; nucleosome; nuclear chromatin; chromosome; nuclear euchromatin
IFT22	1.37535e-11	0.255778	0.674	0.566	5.03391e-07	intracellular protein transport; intraciliary transport involved in cilium assembly; Rab protein signal transduction	nucleotide binding; GTP binding; GTPase activity	centrosome; cilium; intraciliary transport particle B; cell projection; ciliary tip
TCTEX1D2	1.40273e-11	0.258016	0.869	0.818	5.13412e-07	cilium assembly; regulation of intraciliary retrograde transport; regulation of cilium assembly	protein binding; dynein intermediate chain binding	ciliary base; spindle pole; centrosome; cytoplasmic dynein complex; axoneme; interphase microtubule organizing center
RAB13	1.66746e-11	0.2507	0.602	0.469	6.10307e-07	protein transport; intracellular protein transport; Rab protein signal transduction; protein secretion; post-translational protein modification; endosomal transport; cellular response to insulin stimulus; neuron projection development; protein localization to plasma membrane; cortical actin cytoskeleton organization; endocytic recycling; bicellular tight junction assembly; regulation of exocytosi…	nucleotide binding; GTPase activity; GTP binding; protein binding	membrane; cytosol; plasma membrane; cell projection; cell junction; cytoplasmic vesicle; cytoplasmic vesicle membrane; endosome; bicellular tight junction; lamellipodium; extracellular exosome; trans-Golgi network; recycling endosome; recycling endosome membrane; synaptic vesicle; lateral plasma membrane; neuron projection; endocytic vesicle; trans-Golgi network transport vesicle; insulin-respons…
MT2A	1.70527e-11	-0.393514	0.519	0.652	6.24146e-07	cellular copper ion homeostasis; cellular response to drug; interferon-gamma-mediated signaling pathway; negative regulation of growth; cellular zinc ion homeostasis; response to metal ion; detoxification of copper ion; cellular response to interleukin-3; cellular response to erythropoietin; cellular response to cadmium ion; cellular response to copper ion; cellular response to zinc ion	metal ion binding; zinc ion binding; protein binding; drug binding	nucleus; cytoplasm; perinuclear region of cytoplasm; cytosol
ID2	1.73906e-11	0.310395	0.615	0.471	6.36514e-07	regulation of lipid metabolic process; negative regulation of transcription, DNA-templated; rhythmic process; multicellular organism development; circadian regulation of gene expression; positive regulation of transcription, DNA-templated; neuron differentiation; regulation of cell cycle; positive regulation of gene expression; circadian rhythm; negative regulation of gene expression; negative re…	protein dimerization activity; protein binding; DNA-binding transcription factor activity; DNA-binding transcription factor activity, RNA polymerase II-specific; transcription factor binding; ion channel binding; RNA polymerase II transcription factor binding	cytoplasm; nucleus; protein-containing complex; cytosol
HIST1H2AK	2.09653e-11	-0.173053	0.106	0.238	7.6735e-07	chromatin organization	DNA binding; protein heterodimerization activity; protein binding; enzyme binding	nucleus; nucleosome; chromosome; nuclear chromatin; extracellular exosome
LINC00511	2.12166e-11	-0.162763	0.162	0.309	7.76549e-07
EZR	2.2153e-11	-0.259337	0.755	0.854	8.10821e-07	phosphatidylinositol-mediated signaling; negative regulation of transcription by RNA polymerase II; positive regulation of gene expression; filopodium assembly; regulation of cell shape; actin filament bundle assembly; axon guidance; establishment of endothelial barrier; cellular response to cAMP; positive regulation of protein secretion; negative regulation of ERK1 and ERK2 cascade; microvillus …	RNA binding; actin binding; protein binding; cytoskeletal protein binding; microtubule binding; identical protein binding; cadherin binding; actin filament binding; protein domain specific binding; S100 protein binding; protein kinase A catalytic subunit binding; protein kinase A regulatory subunit binding; protein kinase A binding; ATPase binding; cell adhesion molecule binding; protein C-termin…	apical part of cell; cytoplasm; membrane; fibrillar center; plasma membrane; extracellular space; cytosol; cytoskeleton; cell projection; perinuclear region of cytoplasm; focal adhesion; endosome; filopodium; extracellular exosome; cell periphery; cell cortex; ruffle membrane; basolateral plasma membrane; protein-containing complex; invadopodium; extrinsic component of membrane; microvillus; brus…
HIST1H3G	2.36857e-11	-0.33809	0.357	0.502	8.6692e-07	nucleosome assembly; cellular protein metabolic process; regulation of gene silencing by miRNA; interleukin-7-mediated signaling pathway; regulation of megakaryocyte differentiation; DNA replication-dependent nucleosome assembly; blood coagulation; chromatin silencing at rDNA; negative regulation of gene expression, epigenetic; protein heterotetramerization; chromatin organization; telomere organ…	DNA binding; protein heterodimerization activity; protein binding; cadherin binding	nucleus; membrane; nucleosome; chromosome; extracellular region; nucleoplasm; extracellular exosome; protein-containing complex; nuclear chromosome; nuclear nucleosome
PAK1	2.4226e-11	-0.187426	0.292	0.453	8.86697e-07	positive regulation of cell population proliferation; protein phosphorylation; phosphorylation; exocytosis; metabolic process; cellular response to DNA damage stimulus; apoptotic process; Fc-epsilon receptor signaling pathway; Fc-gamma receptor signaling pathway involved in phagocytosis; T cell receptor signaling pathway; neuron projection morphogenesis; positive regulation of protein phosphoryla…	nucleotide binding; protein kinase activity; protein serine/threonine kinase activity; ATP binding; kinase activity; transferase activity; protein binding; catalytic activity; collagen binding; Rac GTPase binding; protein kinase binding	nucleus; cytoplasm; membrane; cytosol; plasma membrane; chromosome; cell projection; cell junction; nucleoplasm; focal adhesion; dendrite; axon; ruffle membrane; protein-containing complex; nuclear membrane; invadopodium; Z disc; ruffle; intercalated disc; cell-cell junction; actin filament; lamellipodium
BEX3	2.46844e-11	-0.178895	0.977	0.99	9.03475e-07	apoptotic process; multicellular organism development; activation of cysteine-type endopeptidase activity involved in apoptotic process; negative regulation of cysteine-type endopeptidase activity involved in apoptotic process; regulation of cysteine-type endopeptidase activity involved in apoptotic process; extrinsic apoptotic signaling pathway via death domain receptors	metal ion binding; protein binding; identical protein binding; cysteine-type endopeptidase activator activity involved in apoptotic process; death receptor binding; nerve growth factor receptor binding	nucleus; cytoplasm; cytosol
HIST2H2AC	2.52682e-11	-0.620413	0.538	0.636	9.24841e-07	chromatin organization	DNA binding; protein heterodimerization activity	nucleus; nucleosome; chromosome; nuclear chromatin; extracellular exosome
JPH4	3.21221e-11	-0.122677	0.117	0.252	1.1757e-06	release of sequestered calcium ion into cytosol; regulation of ryanodine-sensitive calcium-release channel activity; calcium ion transport into cytosol; regulation of synaptic plasticity; regulation of cytokine production; learning; neuromuscular process controlling balance; regulation of store-operated calcium entry	calcium-release channel activity	membrane; integral component of membrane; endoplasmic reticulum; endoplasmic reticulum membrane; plasma membrane; junctional membrane complex; junctional sarcoplasmic reticulum membrane; smooth endoplasmic reticulum; dendritic shaft
TMEM161B-AS1	3.31097e-11	-0.23581	0.845	0.92	1.21185e-06
EGLN3	3.32832e-11	-0.142378	0.095	0.225	1.2182e-06	oxidation-reduction process; cellular response to DNA damage stimulus; apoptotic process; regulation of transcription from RNA polymerase II promoter in response to hypoxia; response to hypoxia; regulation of cell population proliferation; activation of cysteine-type endopeptidase activity involved in apoptotic process; regulation of neuron apoptotic process; protein hydroxylation; peptidyl-proli…	metal ion binding; oxidoreductase activity; iron ion binding; oxidoreductase activity, acting on paired donors, with incorporation or reduction of molecular oxygen; L-ascorbic acid binding; protein binding; dioxygenase activity; 2-oxoglutarate-dependent dioxygenase activity; peptidyl-proline 4-dioxygenase activity	nucleus; cytoplasm; cytosol; nucleoplasm
KCNN3	3.36356e-11	-0.222332	0.206	0.353	1.2311e-06	ion transport; potassium ion transport; potassium ion transmembrane transport	calmodulin binding; calcium-activated potassium channel activity; small conductance calcium-activated potassium channel activity	membrane; integral component of membrane; plasma membrane; neuron projection; neuronal cell body; cytoplasm
RPS28	3.61656e-11	-0.179444	0.998	1	1.3237e-06	translation; cytoplasmic translation; ribosome biogenesis; rRNA processing; ribosomal small subunit biogenesis; ribosomal small subunit assembly; viral transcription; translational initiation; maturation of SSU-rRNA; nuclear-transcribed mRNA catabolic process, nonsense-mediated decay; SRP-dependent cotranslational protein targeting to membrane	RNA binding; structural constituent of ribosome; protein binding	cytoplasm; endoplasmic reticulum; ribosome; cytosol; cytosolic small ribosomal subunit; nucleoplasm; extracellular exosome; rough endoplasmic reticulum; cytoplasmic side of rough endoplasmic reticulum membrane; small ribosomal subunit; polysomal ribosome; intracellular
MYCN	3.98769e-11	-0.174925	0.189	0.338	1.45953e-06	positive regulation of gene expression; negative regulation of gene expression; regulation of transcription, DNA-templated; positive regulation of transcription, DNA-templated; positive regulation of transcription by RNA polymerase II; regulation of transcription by RNA polymerase II; positive regulation of production of miRNAs involved in gene silencing by miRNA	protein dimerization activity; DNA binding; DNA-binding transcription factor activity; protein binding; DNA-binding transcription activator activity, RNA polymerase II-specific; RNA polymerase II proximal promoter sequence-specific DNA binding; DNA-binding transcription factor activity, RNA polymerase II-specific; kinase binding	nucleus; nucleolus; nuclear chromatin; chromatin
BST2	4.06393e-11	-0.110776	0.021	0.111	1.48744e-06	negative regulation of endopeptidase activity; defense response to virus; immune system process; innate immune response; regulation of actin cytoskeleton organization; response to virus; negative regulation of viral genome replication; neutrophil degranulation; positive regulation of I-kappaB kinase/NF-kappaB signaling; B cell activation; negative regulation of cell growth; type I interferon sign…	RNA binding; protein homodimerization activity; protein binding; identical protein binding; metalloendopeptidase inhibitor activity	cytoplasm; membrane; integral component of membrane; Golgi apparatus; cytosol; plasma membrane; membrane raft; cell surface; anchored component of membrane; endosome; extracellular exosome; late endosome; apical plasma membrane; azurophil granule membrane; multivesicular body
FDFT1	4.23605e-11	-0.263266	0.871	0.931	1.55044e-06	lipid metabolic process; biosynthetic process; steroid biosynthetic process; steroid metabolic process; sterol biosynthetic process; metabolic process; lipid biosynthetic process; cholesterol metabolic process; cholesterol biosynthetic process; ergosterol biosynthetic process; regulation of cholesterol biosynthetic process; regulation of lipid metabolic process; farnesyl diphosphate metabolic pro…	metal ion binding; transferase activity; protein binding; catalytic activity; transferase activity, transferring alkyl or aryl (other than methyl) groups; farnesyl-diphosphate farnesyltransferase activity; squalene synthase activity	endoplasmic reticulum; membrane; integral component of membrane; endoplasmic reticulum membrane; intracellular membrane-bounded organelle
MAP2	4.99468e-11	0.290055	0.845	0.787	1.8281e-06	microtubule bundle formation; central nervous system neuron development; microtubule cytoskeleton organization; neuron projection development; regulation of cellular protein localization; regulation of microtubule polymerization; dendrite development; negative regulation of axon extension; negative regulation of microtubule polymerization; dendrite morphogenesis; positive regulation of anterograd…	protein binding; microtubule binding; tubulin binding; calmodulin binding; dystroglycan binding; tau protein binding; structural molecule activity	cytoplasm; neuronal cell body; nucleolus; cytosol; cytoskeleton; cell projection; microtubule; dendrite; neuron projection; microtubule associated complex; axon initial segment; dendritic growth cone; dendrite cytoplasm; dendritic shaft; axon hillock; dendritic branch; basal dendrite; primary dendrite; distal dendrite; apical distal dendrite; dendritic filopodium; proximal dendrite; proximal neur…
ZNF428	5.61182e-11	-0.210747	0.889	0.938	2.05398e-06		nucleic acid binding; metal ion binding
RPLP1	5.92429e-11	-0.16538	1	1	2.16835e-06	translation; cytoplasmic translation; translational elongation; regulation of translation; activation of protein kinase activity; viral transcription; translational initiation; nuclear-transcribed mRNA catabolic process, nonsense-mediated decay; SRP-dependent cotranslational protein targeting to membrane	structural constituent of ribosome; protein binding; ribonucleoprotein complex binding; protein kinase activator activity	ribosome; focal adhesion; cytosolic large ribosomal subunit; cytosol; intracellular
LRRC58	6.48805e-11	-0.253956	0.485	0.629	2.37469e-06		protein binding
KMT2E	7.01997e-11	0.252921	0.905	0.883	2.56938e-06	chromatin organization; cell cycle; erythrocyte differentiation; positive regulation of transcription, DNA-templated; histone lysine methylation; cell cycle arrest; positive regulation of G1/S transition of mitotic cell cycle; regulation of megakaryocyte differentiation; DNA methylation; neutrophil activation; neutrophil mediated immunity; positive regulation of histone H3-K4 trimethylation	metal ion binding; protein binding; enzyme binding; methylated histone binding	nucleus; cytoplasm; nuclear speck; membrane; chromosome; plasma membrane; cytoskeleton; nucleoplasm; microtubule organizing center; protein-containing complex; chromatin; transcriptionally active chromatin
KIF21A	7.06618e-11	-0.225351	0.894	0.942	2.58629e-06	microtubule-based movement	nucleotide binding; ATP binding; motor activity; microtubule motor activity; microtubule binding; protein binding; ATPase activity	cytosol; plasma membrane; cytoplasm; cytoskeleton; microtubule; kinesin complex
PBX3	7.28397e-11	0.29561	0.524	0.409	2.666e-06	regulation of transcription, DNA-templated; anterior compartment pattern formation; posterior compartment specification; regulation of respiratory gaseous exchange by nervous system process; respiratory gaseous exchange by respiratory system; adult locomotory behavior; dorsal spinal cord development; positive regulation of transcription by RNA polymerase II; neuron development	DNA binding; DNA-binding transcription factor activity; sequence-specific DNA binding; DNA-binding transcription factor activity, RNA polymerase II-specific; RNA polymerase II distal enhancer sequence-specific DNA binding; DNA-binding transcription activator activity, RNA polymerase II-specific; protein binding	nucleus; nuclear chromatin; transcription factor complex
NEDD4L	7.61562e-11	-0.243152	0.589	0.716	2.78739e-06	protein ubiquitination; sodium ion transport; ubiquitin-dependent protein catabolic process; cell differentiation; regulation of protein catabolic process; positive regulation of protein catabolic process; ion transmembrane transport; viral life cycle; protein polyubiquitination; proteasome-mediated ubiquitin-dependent protein catabolic process; viral process; regulation of protein stability; reg…	transferase activity; ubiquitin-protein transferase activity; protein binding; ubiquitin protein ligase activity; sodium channel regulator activity; ion channel binding; potassium channel regulator activity; sodium channel inhibitor activity; potassium channel inhibitor activity	cytoplasm; Golgi apparatus; endosome; nucleoplasm; cytosol; extracellular exosome; plasma membrane; multivesicular body
HINT1	7.77148e-11	0.153069	0.997	0.999	2.84444e-06	apoptotic process; positive regulation of calcium-mediated signaling; signal transduction; regulation of transcription, DNA-templated; intrinsic apoptotic signaling pathway by p53 class mediator; purine ribonucleotide catabolic process	nucleotide binding; hydrolase activity; catalytic activity; protein kinase C binding	nucleus; cytoplasm; cytosol; plasma membrane; extracellular exosome; histone deacetylase complex; cytoskeleton
RPS8	7.77659e-11	-0.16332	1	1	2.84631e-06	translation; maturation of SSU-rRNA from tricistronic rRNA transcript (SSU-rRNA, 5.8S rRNA, LSU-rRNA); viral transcription; translational initiation; nuclear-transcribed mRNA catabolic process, nonsense-mediated decay; SRP-dependent cotranslational protein targeting to membrane	RNA binding; structural constituent of ribosome; protein binding	nucleus; cytoplasm; membrane; endoplasmic reticulum; cytosol; ribosome; cytosolic small ribosomal subunit; focal adhesion; nucleoplasm; extracellular exosome; ribonucleoprotein complex; intracellular
MIF	8.88101e-11	-0.187319	0.99	1	3.25054e-06	negative regulation of cell migration; negative regulation of gene expression; positive regulation of ERK1 and ERK2 cascade; positive regulation of fibroblast proliferation; negative regulation of apoptotic process; inflammatory response; immune system process; innate immune response; leukocyte migration; positive chemotaxis; cell population proliferation; neutrophil degranulation; positive regul…	isomerase activity; protein binding; cytokine activity; identical protein binding; protease binding; phenylpyruvate tautomerase activity; signaling receptor binding; chemoattractant activity; dopachrome isomerase activity; cytokine receptor binding	extracellular space; cytoplasm; plasma membrane; cytosol; nucleoplasm; extracellular region; extracellular exosome; cell surface; secretory granule lumen; ficolin-1-rich granule lumen; vesicle
CHST2	9.07306e-11	-0.12127	0.072	0.186	3.32083e-06	carbohydrate metabolic process; inflammatory response; multicellular organism development; keratan sulfate biosynthetic process; N-acetylglucosamine metabolic process; sulfur compound metabolic process	transferase activity; sulfotransferase activity; N-acetylglucosamine 6-O-sulfotransferase activity	membrane; integral component of membrane; Golgi apparatus; Golgi membrane; trans-Golgi network; intrinsic component of Golgi membrane
CCND1	9.08738e-11	0.434285	0.656	0.535	3.32607e-06	positive regulation of protein phosphorylation; cell division; cellular response to DNA damage stimulus; cell cycle; regulation of cyclin-dependent protein serine/threonine kinase activity; negative regulation of transcription by RNA polymerase II; negative regulation of cell cycle arrest; transcription initiation from RNA polymerase II promoter; positive regulation of G2/M transition of mitotic …	protein binding; transcription corepressor activity; protein kinase binding; enzyme binding; transcription factor binding; proline-rich region binding; histone deacetylase binding; protein kinase activity; cyclin-dependent protein serine/threonine kinase regulator activity; kinase activity; protein-containing complex binding	nucleus; cytoplasm; membrane; nucleoplasm; cytosol; nuclear membrane; intracellular; transcriptional repressor complex; cyclin-dependent protein kinase holoenzyme complex; bicellular tight junction
GPC4	9.70737e-11	-0.160186	0.223	0.378	3.55299e-06	regulation of signal transduction; cell migration; retinoid metabolic process; glycosaminoglycan biosynthetic process; glycosaminoglycan catabolic process; Wnt signaling pathway, planar cell polarity pathway; regulation of neurotransmitter receptor localization to postsynaptic specialization membrane; synaptic membrane adhesion; regulation of protein localization to membrane; regulation of presyn…	coreceptor activity involved in Wnt signaling pathway, planar cell polarity pathway	nucleus; membrane; extracellular space; plasma membrane; extracellular region; collagen-containing extracellular matrix; anchored component of membrane; anchored component of plasma membrane; cell surface; synapse; extracellular exosome; lysosomal lumen; Golgi lumen; external side of plasma membrane; glutamatergic synapse; anchored component of presynaptic membrane
ATP8A1	1.05615e-10	-0.114428	0.057	0.164	3.86562e-06	phospholipid transport; lipid transport; cation transmembrane transport; ion transmembrane transport; neutrophil degranulation; phospholipid translocation; learning; positive regulation of cell migration; positive regulation of phospholipid translocation	ATP binding; magnesium ion binding; ATPase-coupled intramembrane lipid transporter activity; metal ion binding; nucleotide binding; protein binding; ATPase-coupled cation transmembrane transporter activity	integral component of membrane; membrane; intracellular membrane-bounded organelle; endoplasmic reticulum; Golgi apparatus; plasma membrane; cytoplasmic vesicle; extracellular exosome; trans-Golgi network; specific granule membrane; azurophil granule membrane; chromaffin granule membrane
TSHZ2	1.06643e-10	-0.111517	0.036	0.133	3.90322e-06	multicellular organism development; regulation of gene expression; regulation of transcription by RNA polymerase II	nucleic acid binding; metal ion binding; DNA binding; DNA-binding transcription factor activity, RNA polymerase II-specific; protein binding; chromatin binding	nucleus; nuclear chromatin
DDIT4	1.20493e-10	-0.158806	0.55	0.717	4.41017e-06	response to hypoxia; negative regulation of signal transduction; negative regulation of TOR signaling; protein-containing complex disassembly; intrinsic apoptotic signaling pathway in response to DNA damage by p53 class mediator; negative regulation of glycolytic process; cellular response to dexamethasone stimulus; reactive oxygen species metabolic process; apoptotic process; defense response to…	14-3-3 protein binding	cytoplasm; cytosol; mitochondrion; intracellular
ANK2	1.20607e-10	0.249896	0.442	0.307	4.41433e-06	signal transduction; positive regulation of gene expression; protein stabilization; regulation of cardiac muscle contraction by regulation of the release of sequestered calcium ion; regulation of ventricular cardiac muscle cell membrane repolarization; regulation of heart rate; protein transport; cytoskeleton organization; endocytosis; endoplasmic reticulum to Golgi vesicle-mediated transport; pr…	protein binding; ion channel binding; enzyme binding; ATPase binding; protein kinase binding; protein binding, bridging; phosphorylation-dependent protein binding; spectrin binding; structural constituent of cytoskeleton	cytoplasm; membrane; mitochondrion; plasma membrane; cytoskeleton; cell junction; synapse; postsynaptic membrane; lysosome; endosome; early endosome; cytosol; basolateral plasma membrane; recycling endosome; M band; apical plasma membrane; Z disc; T-tubule; sarcolemma; axon initial segment; intercalated disc; A band; costamere; neuron projection; membrane raft
ADGRB3	1.22015e-10	-0.186569	0.315	0.469	4.46586e-06	G protein-coupled receptor signaling pathway; positive regulation of GTPase activity; signal transduction; cell surface receptor signaling pathway; negative regulation of angiogenesis; myoblast fusion; adenylate cyclase-activating G protein-coupled receptor signaling pathway; neuron remodeling; regulation of dendrite morphogenesis; positive regulation of synapse assembly; motor learning; maintena…	G protein-coupled receptor activity; protein binding; transmembrane signaling receptor activity; GTPase activator activity	membrane; integral component of membrane; plasma membrane; integral component of plasma membrane; postsynapse; synaptic cleft
MCEE	1.24925e-10	-0.119382	0.065	0.176	4.57239e-06	short-chain fatty acid catabolic process; L-methylmalonyl-CoA metabolic process	metal ion binding; isomerase activity; protein binding; methylmalonyl-CoA epimerase activity	mitochondrion; mitochondrial matrix
HIST1H2AC	1.38147e-10	-0.24009	0.24	0.383	5.05633e-06	chromatin organization; negative regulation of cell population proliferation	DNA binding; protein heterodimerization activity	nucleus; nucleosome; chromosome; nuclear chromatin; nucleoplasm; extracellular exosome
KIAA1217	1.39136e-10	-0.103537	0.042	0.143	5.09252e-06	multicellular organism development; embryonic skeletal system development		cytoplasm
SLCO5A1	1.41032e-10	-0.135997	0.241	0.415	5.16192e-06	transmembrane transport; sodium-independent organic anion transport	sodium-independent organic anion transmembrane transporter activity; protein binding; transporter activity	membrane; integral component of membrane; plasma membrane; integral component of plasma membrane
CD82	1.51548e-10	0.215383	0.287	0.167	5.54682e-06		protein binding	membrane; integral component of membrane; plasma membrane; integral component of plasma membrane; extracellular exosome
STK33	1.58972e-10	0.21563	0.387	0.262	5.81854e-06	protein phosphorylation; phosphorylation; protein autophosphorylation; signal transduction in response to DNA damage; mitotic DNA damage checkpoint	nucleotide binding; protein kinase activity; protein serine/threonine kinase activity; ATP binding; kinase activity; transferase activity	cytoplasm; perinuclear region of cytoplasm; nucleus
CPE	1.62485e-10	-0.196932	0.767	0.883	5.9471e-06	proteolysis; neuropeptide signaling pathway; insulin processing; peptide hormone secretion; protein localization to secretory granule; cellular protein modification process; peptide metabolic process; protein processing; cardiac left ventricle morphogenesis; Wnt signaling pathway; protein localization to membrane	zinc ion binding; metallocarboxypeptidase activity; metal ion binding; hydrolase activity; peptidase activity; metallopeptidase activity; carboxypeptidase activity; cell adhesion molecule binding; neurexin family protein binding	nucleus; membrane; extracellular region; cytoplasmic vesicle; extracellular space; secretory granule membrane; extracellular exosome; plasma membrane; transport vesicle; transport vesicle membrane; Golgi apparatus
MICOS10	2.09649e-10	0.256772	0.897	0.899	7.67338e-06		protein binding	mitochondrial inner membrane; mitochondrion; MICOS complex; membrane; integral component of membrane
DHRS3	2.12425e-10	-0.157617	0.116	0.242	7.77496e-06	oxidation-reduction process; electron transport chain; retinol metabolic process; visual perception; retinoid metabolic process; outflow tract morphogenesis; regulation of ossification; regulation of retinoic acid receptor signaling pathway; negative regulation of retinoic acid receptor signaling pathway; roof of mouth development; bone morphogenesis; cardiac septum morphogenesis	oxidoreductase activity; retinol dehydrogenase activity; NADP-retinol dehydrogenase activity; electron transfer activity; nucleotide binding	membrane; integral component of membrane; endoplasmic reticulum membrane; lipid droplet; photoreceptor outer segment membrane
PTPRD	2.41783e-10	0.149164	0.209	0.101	8.84949e-06	protein dephosphorylation; dephosphorylation; peptidyl-tyrosine dephosphorylation; phosphate-containing compound metabolic process; regulation of presynapse assembly; positive regulation of synapse assembly; heterophilic cell-cell adhesion via plasma membrane cell adhesion molecules; synaptic membrane adhesion; transmembrane receptor protein tyrosine phosphatase signaling pathway; positive regula…	hydrolase activity; phosphoprotein phosphatase activity; protein binding; protein tyrosine phosphatase activity; phosphatase activity; signaling receptor binding; cell adhesion molecule binding; transmembrane receptor protein tyrosine phosphatase activity	membrane; integral component of membrane; plasma membrane; extracellular exosome; integral component of plasma membrane; glutamatergic synapse
GDF11	2.67622e-10	0.193828	0.439	0.298	9.79525e-06	skeletal system development; metanephros development; ureteric bud development; negative regulation of cell population proliferation; animal organ morphogenesis; anterior/posterior pattern specification; spinal cord anterior/posterior patterning; pancreas development; negative regulation of cell differentiation; negative regulation of neuron differentiation; cell maturation; camera-type eye morph…	growth factor activity; cytokine activity; protein binding; transforming growth factor beta receptor binding	intracellular membrane-bounded organelle; nucleoplasm; extracellular space; extracellular region; protein-containing complex
ADGRV1	2.80585e-10	0.227898	0.496	0.361	1.02697e-05	G protein-coupled receptor signaling pathway; negative regulation of adenylate cyclase activity; signal transduction; cell surface receptor signaling pathway; cell communication; response to stimulus; nervous system development; visual perception; inner ear receptor cell stereocilium organization; regulation of protein stability; positive regulation of bone mineralization; cell-cell adhesion; cel…	G protein-coupled receptor activity; hydrolase activity; protein binding; transmembrane signaling receptor activity; G-protein alpha-subunit binding; adenylate cyclase inhibitor activity; calcium ion binding	integral component of membrane; membrane; plasma membrane; cell projection; extracellular exosome; photoreceptor inner segment; cell surface; stereocilium membrane; cytoplasm; receptor complex; stereocilia ankle link; stereocilia ankle link complex; periciliary membrane compartment; USH2 complex; stereocilium; synapse
FAT4	2.81703e-10	-0.202202	0.271	0.419	1.03106e-05	cell adhesion; homophilic cell adhesion via plasma membrane adhesion molecules; hippo signaling; cerebral cortex development; cell-cell adhesion; neurogenesis; heterophilic cell-cell adhesion via plasma membrane cell adhesion molecules; branching involved in ureteric bud morphogenesis; kidney development; heart morphogenesis; plasma membrane organization; Notch signaling pathway; fibroblast growt…	calcium ion binding; protein binding	membrane; integral component of membrane; plasma membrane; extracellular exosome; apical part of cell
SLC38A1	2.95798e-10	0.232794	0.437	0.304	1.08265e-05	ion transport; sodium ion transport; amino acid transmembrane transport; amino acid transport; L-alpha-amino acid transmembrane transport; neutral amino acid transport; neurotransmitter uptake; glutamine transport; female pregnancy	symporter activity; protein binding; amino acid transmembrane transporter activity; neutral amino acid transmembrane transporter activity; amino acid:sodium symporter activity; L-amino acid transmembrane transporter activity; L-glutamine transmembrane transporter activity	membrane; integral component of membrane; plasma membrane; integral component of plasma membrane; extracellular exosome; axon
NEUROG2	3.24196e-10	-0.218638	0.323	0.488	1.18659e-05	regulation of transcription, DNA-templated; neuron differentiation; multicellular organism development; cell differentiation; regulation of transcription by RNA polymerase II; nervous system development; positive regulation of DNA-binding transcription factor activity	protein dimerization activity; DNA binding; DNA-binding transcription factor activity, RNA polymerase II-specific; E-box binding	nucleus; nuclear chromatin
COX5A	3.27112e-10	0.208237	0.971	0.953	1.19726e-05	proton transmembrane transport; mitochondrial electron transport, cytochrome c to oxygen; electron transport chain	metal ion binding; protein binding; cytochrome-c oxidase activity; electron transfer activity	membrane; mitochondrial inner membrane; mitochondrion; mitochondrial respiratory chain complex IV
RPL37	3.73194e-10	-0.156072	0.998	1	1.36593e-05	translation; viral transcription; translational initiation; nuclear-transcribed mRNA catabolic process, nonsense-mediated decay; SRP-dependent cotranslational protein targeting to membrane	RNA binding; metal ion binding; structural constituent of ribosome; rRNA binding	ribosome; cytosolic large ribosomal subunit; cytosol; intracellular
RPN2	4.06321e-10	0.297181	0.884	0.865	1.48717e-05	protein N-linked glycosylation; protein glycosylation; cellular protein modification process; protein N-linked glycosylation via asparagine; aging; response to drug	protein binding; dolichyl-diphosphooligosaccharide-protein glycotransferase activity; ribosome binding	integral component of membrane; endoplasmic reticulum; endoplasmic reticulum membrane; oligosaccharyltransferase complex; membrane; autophagosome membrane; rough endoplasmic reticulum
LAPTM4A	4.37105e-10	-0.22642	0.759	0.85	1.59985e-05		protein binding	membrane; integral component of membrane; Golgi apparatus; lysosomal membrane; late endosome membrane; endomembrane system
JMJD1C	4.51068e-10	0.228548	0.746	0.66	1.65096e-05	oxidation-reduction process; chromatin organization; regulation of transcription, DNA-templated; blood coagulation; histone H3-K9 demethylation	metal ion binding; oxidoreductase activity; protein binding; dioxygenase activity; histone demethylase activity (H3-K9 specific); chromatin DNA binding; transcription regulatory region sequence-specific DNA binding; thyroid hormone receptor binding	nucleus; nucleoplasm; chromatin
CNN3	4.96497e-10	0.298332	0.884	0.844	1.81723e-05	actomyosin structure organization; cell-cell adhesion; epithelial cell differentiation; negative regulation of ATPase activity	actin binding; calmodulin binding; cadherin binding involved in cell-cell adhesion; microtubule binding; protein binding	cytosol; actin cytoskeleton; focal adhesion; cell-cell adherens junction; postsynaptic density; dendrite; neuronal cell body; dendritic spine
STAT3	5.02174e-10	0.217261	0.387	0.262	1.83801e-05	miRNA mediated inhibition of translation; positive regulation of gene expression; positive regulation of transcription by RNA polymerase II; positive regulation of metalloendopeptidase activity; positive regulation of transcription, DNA-templated; positive regulation of cell migration; phosphorylation; regulation of transcription, DNA-templated; signal transduction; inflammatory response; defense…	transcription regulatory region DNA binding; DNA binding; DNA-binding transcription factor activity; chromatin DNA binding; protein homodimerization activity; protein binding; identical protein binding; DNA-binding transcription activator activity, RNA polymerase II-specific; RNA polymerase II proximal promoter sequence-specific DNA binding; DNA-binding transcription factor activity, RNA polymera…	cytoplasm; nucleus; cytosol; nucleoplasm; plasma membrane; nuclear chromatin; RNA polymerase II transcription factor complex; transcription factor complex; mitochondrion; mitochondrial inner membrane; postsynaptic density; nuclear transcription factor complex; Schaffer collateral - CA1 synapse; glutamatergic synapse
HS6ST1	5.02504e-10	0.143548	0.276	0.157	1.83921e-05	neuron development; glycosaminoglycan biosynthetic process; angiogenesis; heparan sulfate proteoglycan biosynthetic process; heparan sulfate proteoglycan biosynthetic process, enzymatic modification; lung alveolus development; labyrinthine layer blood vessel development	transferase activity; sulfotransferase activity; heparan sulfate 6-O-sulfotransferase activity	membrane; integral component of membrane; integral component of plasma membrane; Golgi membrane
CHN1	5.07996e-10	0.173596	0.462	0.325	1.85932e-05	intracellular signal transduction; signal transduction; positive regulation of signal transduction; positive regulation of GTPase activity; regulation of small GTPase mediated signal transduction; nervous system development; ephrin receptor signaling pathway; regulation of GTPase activity; regulation of axonogenesis; motor neuron axon guidance	metal ion binding; GTPase activator activity; protein binding; ephrin receptor binding; SH3/SH2 adaptor activity	cytosol
FOXN2	5.46833e-10	-0.155709	0.166	0.3	2.00146e-05	regulation of transcription, DNA-templated; regulation of transcription by RNA polymerase II; skeletal muscle cell differentiation	DNA binding; DNA-binding transcription factor activity; sequence-specific DNA binding; protein binding; DNA-binding transcription factor activity, RNA polymerase II-specific	nucleus; intracellular membrane-bounded organelle; nuclear chromatin
NTRK2	5.69112e-10	0.152638	0.116	0.039	2.08301e-05	positive regulation of protein phosphorylation; protein phosphorylation; phosphorylation; transmembrane receptor protein tyrosine kinase signaling pathway; peptidyl-tyrosine phosphorylation; multicellular organism development; cell differentiation; nervous system development; positive regulation of gene expression; positive regulation of MAPK cascade; cerebral cortex development; positive regulat…	nucleotide binding; protein kinase activity; ATP binding; kinase activity; transferase activity; protein tyrosine kinase activity; transmembrane receptor protein tyrosine kinase activity; protein homodimerization activity; protein binding; neurotrophin receptor activity; neurotrophin binding; brain-derived neurotrophic factor binding; brain-derived neurotrophic factor-activated receptor activity	cytoplasm; membrane; integral component of membrane; integral component of plasma membrane; plasma membrane; cell projection; perinuclear region of cytoplasm; cell junction; synapse; postsynaptic membrane; dendrite; endosome; early endosome; receptor complex; axon; early endosome membrane; endosome membrane; postsynaptic density; Golgi membrane; axon terminus; dendritic spine; cytosol; terminal b…
CSRP2	5.9276e-10	0.215563	0.933	0.909	2.16956e-05	multicellular organism development; cell differentiation; actin cytoskeleton organization	metal ion binding; protein binding	nucleus; focal adhesion; cytoplasm
CD99	6.16119e-10	0.306117	0.855	0.837	2.25506e-05	cell adhesion; regulation of immune response; homotypic cell-cell adhesion; T cell extravasation; positive regulation of neutrophil extravasation	protein binding	membrane; integral component of membrane; focal adhesion; plasma membrane; integral component of plasma membrane; cytoplasm
NYNRIN	6.26713e-10	-0.120056	0.091	0.207	2.29383e-05	DNA integration	nucleic acid binding	membrane; integral component of membrane
ELFN1	7.14114e-10	0.141691	0.215	0.111	2.61373e-05	negative regulation of phosphoprotein phosphatase activity; negative regulation of phosphatase activity; synapse organization	protein phosphatase inhibitor activity; protein binding	membrane; integral component of membrane; cell projection; dendrite; extracellular space; extracellular matrix; excitatory synapse
ARL6IP5	7.45414e-10	-0.240547	0.648	0.752	2.72829e-05	negative regulation of L-glutamate import across plasma membrane; L-glutamate transmembrane transport; positive regulation of apoptotic process; positive regulation of stress-activated MAPK cascade; positive regulation of cysteine-type endopeptidase activity involved in apoptotic process; intrinsic apoptotic signaling pathway in response to oxidative stress; negative regulation of mitochondrial m…	protein binding	cytoplasm; membrane; integral component of membrane; endoplasmic reticulum; endoplasmic reticulum membrane; plasma membrane; cytoskeleton
FGFR1	7.93988e-10	0.250538	0.76	0.703	2.90608e-05	protein phosphorylation; phosphorylation; positive regulation of cell population proliferation; peptidyl-tyrosine phosphorylation; fibroblast growth factor receptor signaling pathway; positive regulation of blood vessel endothelial cell migration; positive regulation of vascular endothelial cell proliferation; phosphatidylinositol-mediated signaling; transmembrane receptor protein tyrosine kinase…	nucleotide binding; protein kinase activity; ATP binding; kinase activity; transferase activity; protein tyrosine kinase activity; transmembrane receptor protein tyrosine kinase activity; fibroblast growth factor-activated receptor activity; protein homodimerization activity; protein binding; identical protein binding; heparin binding; fibroblast growth factor binding; receptor-receptor interacti…	membrane; integral component of membrane; nucleus; cytoplasm; nucleolus; cytosol; plasma membrane; extracellular region; cytoplasmic vesicle; integral component of plasma membrane; receptor complex
ANKRD44	8.12073e-10	-0.144501	0.106	0.222	2.97227e-05		protein binding
KMT2C	8.86203e-10	-0.221316	0.555	0.667	3.24359e-05	histone H3-K4 methylation; regulation of transcription, DNA-templated; methylation; chromatin organization; histone lysine methylation; positive regulation of transcription by RNA polymerase II; regulation of megakaryocyte differentiation	metal ion binding; histone methyltransferase activity (H3-K4 specific); protein binding; RNA binding; transferase activity; methyltransferase activity; DNA binding; transferase activity, transferring acyl groups; histone-lysine N-methyltransferase activity; histone binding; transcription coactivator activity	nucleus; MLL3/4 complex; nucleoplasm; histone methyltransferase complex
MT3	9.29488e-10	-0.261552	0.104	0.217	3.40202e-05	negative regulation of apoptotic process; energy reserve metabolic process; cholesterol catabolic process; zinc ion transport; cellular metal ion homeostasis; cellular zinc ion homeostasis; response to oxidative stress; brain development; negative regulation of autophagy; positive regulation of gene expression; positive regulation of cell death; astrocyte development; regulation of response to fo…	metal ion binding; zinc ion binding; protein binding; copper ion binding; drug binding; cysteine-type endopeptidase inhibitor activity involved in apoptotic process; protein kinase activator activity; antioxidant activity; cadmium ion binding	cytoplasm; perinuclear region of cytoplasm; extracellular space; mitochondrial outer membrane; rough endoplasmic reticulum; ribosome; microtubule; plasma membrane; synaptic vesicle; postsynaptic density; axon; dendritic spine; astrocyte projection; astrocyte end-foot; nucleus; cytosol; inclusion body
SLC25A13	9.6609e-10	0.189846	0.328	0.205	3.53599e-05	transmembrane transport; ATP biosynthetic process; gluconeogenesis; cellular respiration; response to calcium ion; L-glutamate transmembrane transport; aspartate transmembrane transport; malate-aspartate shuttle; L-aspartate transmembrane transport; mitochondrial transport	transmembrane transporter activity; metal ion binding; calcium ion binding; identical protein binding; L-glutamate transmembrane transporter activity; L-aspartate transmembrane transporter activity	membrane; integral component of membrane; mitochondrion; mitochondrial inner membrane; integral component of plasma membrane
RPS20	1.02166e-09	0.144556	0.997	1	3.73939e-05	translation; viral transcription; translational initiation; nuclear-transcribed mRNA catabolic process, nonsense-mediated decay; SRP-dependent cotranslational protein targeting to membrane	RNA binding; structural constituent of ribosome; protein binding	cytoplasm; membrane; ribosome; small ribosomal subunit; cytosolic small ribosomal subunit; nucleoplasm; cytosol; extracellular exosome; intracellular
BTBD6	1.15381e-09	-0.143927	0.155	0.286	4.22304e-05	post-translational protein modification; neurogenesis	protein binding	cytoplasm; cytosol
CDH7	1.15786e-09	0.136828	0.127	0.048	4.23787e-05	cell adhesion; homophilic cell adhesion via plasma membrane adhesion molecules; cell-cell adhesion; cell-cell junction assembly; adherens junction organization; cell morphogenesis; calcium-dependent cell-cell adhesion via plasma membrane cell adhesion molecules; cell-cell adhesion mediated by cadherin	metal ion binding; calcium ion binding; cadherin binding; protein homodimerization activity; cytoskeletal protein binding	membrane; integral component of membrane; plasma membrane; cell surface; cell-cell adherens junction; catenin complex
ALDH7A1	1.31554e-09	0.2161	0.796	0.731	4.815e-05	oxidation-reduction process; lysine catabolic process; sensory perception of sound; cellular aldehyde metabolic process; glycine betaine biosynthetic process from choline; choline catabolic process	oxidoreductase activity; oxidoreductase activity, acting on the aldehyde or oxo group of donors, NAD or NADP as acceptor; protein binding; aldehyde dehydrogenase (NAD) activity; glyceraldehyde-3-phosphate dehydrogenase (NAD+) (non-phosphorylating) activity; L-aminoadipate-semialdehyde dehydrogenase activity; betaine-aldehyde dehydrogenase activity	cytosol; mitochondrion; nucleus; cytoplasm; extracellular exosome; mitochondrial matrix
HIST1H4E	1.49365e-09	-0.265625	0.3	0.435	5.46691e-05	nucleosome assembly; DNA-templated transcription, initiation; cellular protein metabolic process; regulation of gene silencing by miRNA; CENP-A containing nucleosome assembly; regulation of megakaryocyte differentiation; DNA replication-dependent nucleosome assembly; DNA replication-independent nucleosome assembly; chromatin silencing at rDNA; negative regulation of gene expression, epigenetic; p…	RNA binding; DNA binding; protein heterodimerization activity; protein binding; protein domain specific binding	nucleus; membrane; nucleosome; chromosome; extracellular region; nucleoplasm; extracellular exosome; protein-containing complex; nuclear chromosome, telomeric region; nuclear chromosome; nuclear nucleosome
C15orf61	1.49815e-09	-0.160771	0.184	0.312	5.48336e-05			extracellular region
CAMK2N1	1.63186e-09	-0.258618	0.437	0.587	5.97275e-05	positive regulation of gene expression; negative regulation of cell population proliferation; negative regulation of cell cycle; negative regulation of protein kinase activity; negative regulation of ERK1 and ERK2 cascade; negative regulation of proteolysis; negative regulation of cyclin-dependent protein kinase activity	protein kinase inhibitor activity; protein kinase binding; calcium-dependent protein kinase inhibitor activity	membrane; plasma membrane; cell junction; synapse; postsynaptic membrane; postsynaptic density; neuron projection; dendrite; neuronal cell body
DPCD	1.7144e-09	0.235109	0.483	0.372	6.27486e-05	epithelial cilium movement involved in extracellular fluid movement; spermatogenesis; determination of left/right symmetry; ventricular system development; lateral ventricle development; third ventricle development; flagellated sperm motility; left/right pattern formation	protein binding	nucleus; extracellular region
PHIP	1.72625e-09	-0.210047	0.914	0.962	6.31827e-05	negative regulation of apoptotic process; insulin receptor signaling pathway; positive regulation of transcription, DNA-templated; regulation of transcription by RNA polymerase II; cytoskeleton organization; regulation of cell morphogenesis; regulation of cell shape; positive regulation of cell population proliferation; positive regulation of transcription by RNA polymerase II; positive regulatio…	insulin receptor binding; protein binding; lysine-acetylated histone binding	nucleus
TAGLN2	1.83414e-09	-0.216543	0.313	0.45	6.71312e-05	platelet degranulation; epithelial cell differentiation	protein binding; cadherin binding	extracellular region; cytosol; extracellular exosome; vesicle
SEC11A	1.96289e-09	0.193959	0.91	0.899	7.18438e-05	proteolysis; signal peptide processing	hydrolase activity; peptidase activity; serine-type peptidase activity	membrane; integral component of membrane; endoplasmic reticulum; endoplasmic reticulum membrane; organelle membrane; intracellular membrane-bounded organelle; signal peptidase complex
CTSC	1.96399e-09	0.203072	0.452	0.33	7.18841e-05	proteolysis; apoptotic process; neutrophil degranulation; immune response; endoplasmic reticulum to Golgi vesicle-mediated transport; COPII vesicle coating; proteolysis involved in cellular protein catabolic process; positive regulation of proteolysis involved in cellular protein catabolic process; T cell mediated cytotoxicity; aging; response to organic substance; negative regulation of myelinat…	hydrolase activity; protein binding; peptidase activity; cysteine-type peptidase activity; cysteine-type endopeptidase activity; chaperone binding; serine-type endopeptidase activity; peptidase activator activity involved in apoptotic process; phosphatase binding; chloride ion binding; identical protein binding; protein self-association	membrane; intracellular membrane-bounded organelle; centrosome; nucleoplasm; extracellular space; lysosome; extracellular region; Golgi membrane; extracellular exosome; collagen-containing extracellular matrix; endoplasmic reticulum lumen; azurophil granule lumen; endoplasmic reticulum-Golgi intermediate compartment membrane; COPII-coated ER to Golgi transport vesicle; cytoplasm; endoplasmic reti…
HIST1H2BF	2.13858e-09	-0.177531	0.165	0.29	7.82741e-05	nucleosome assembly; defense response to bacterium; protein ubiquitination; innate immune response in mucosa; antibacterial humoral response; defense response to Gram-positive bacterium; antimicrobial humoral immune response mediated by antimicrobial peptide	DNA binding; protein heterodimerization activity; protein binding; identical protein binding	nucleus; cytosol; nucleoplasm; nucleosome; chromosome; extracellular space; extracellular exosome
SH3RF1	2.26217e-09	-0.150646	0.284	0.43	8.27976e-05	negative regulation of apoptotic process; protein ubiquitination; apoptotic process; protein autoubiquitination; regulation of JNK cascade; negative regulation of cysteine-type endopeptidase activity involved in apoptotic process; positive regulation of JNK cascade; negative regulation of extrinsic apoptotic signaling pathway; neuron migration; regulation of CD8-positive, alpha-beta T cell prolif…	metal ion binding; transferase activity; protein binding; ubiquitin protein ligase activity; MAP-kinase scaffold activity	cytoplasm; Golgi apparatus; cytosol; cell projection; perinuclear region of cytoplasm; lamellipodium
AC090152.1	2.36063e-09	0.104397	0.176	0.08	8.64015e-05
CDCA7	2.41171e-09	-0.156027	0.276	0.431	8.82711e-05	regulation of transcription, DNA-templated; apoptotic process; regulation of cell population proliferation		nucleus; cytoplasm; cytosol; nucleoplasm
NEGR1	2.49554e-09	0.16049	0.264	0.15	9.13393e-05	cell adhesion; locomotory behavior; feeding behavior; positive regulation of neuron projection development; cell-cell adhesion	protein binding	membrane; plasma membrane; extracellular region; anchored component of membrane
FZD7	2.59997e-09	-0.153287	0.194	0.329	9.51616e-05	negative regulation of cell-substrate adhesion; negative regulation of cardiac muscle cell differentiation; positive regulation of transcription, DNA-templated; signal transduction; cell surface receptor signaling pathway; G protein-coupled receptor signaling pathway; multicellular organism development; Wnt signaling pathway; canonical Wnt signaling pathway; Wnt signaling pathway, planar cell pol…	protein binding; transmembrane signaling receptor activity; G protein-coupled receptor activity; Wnt-activated receptor activity; Wnt-protein binding; phosphatidylinositol-4,5-bisphosphate binding; PDZ domain binding; frizzled binding	membrane; integral component of membrane; plasma membrane; endosome; endosome membrane; recycling endosome membrane
HIST1H1C	2.66653e-09	-0.635354	0.679	0.725	9.75976e-05	nucleosome assembly; regulation of transcription, DNA-templated; negative regulation of DNA recombination; nucleosome positioning; chromosome condensation; negative regulation of chromatin silencing; negative regulation of transcription by RNA polymerase II; regulation of transcription by RNA polymerase II; histone H3-K4 trimethylation; histone H3-K27 trimethylation	RNA binding; DNA binding; chromatin DNA binding; protein binding; double-stranded DNA binding; nucleosomal DNA binding	nucleus; nucleosome; chromosome; nuclear chromatin; nuclear euchromatin; transcriptionally active chromatin
PLP2	2.72516e-09	-0.112998	0.055	0.152	9.97434e-05	ion transmembrane transport; chemotaxis; cytokine-mediated signaling pathway; ion transport	protein binding; ion transmembrane transporter activity; chemokine binding	membrane; integral component of membrane; plasma membrane; endoplasmic reticulum; endoplasmic reticulum membrane
MT-ND4	2.7445e-09	0.161465	0.998	0.998	0.000100452	oxidation-reduction process; mitochondrial electron transport, NADH to ubiquinone; aerobic respiration; ATP synthesis coupled electron transport; response to hypoxia; in utero embryonic development; aging; cerebellum development; response to nicotine; response to ethanol; mitochondrial respiratory chain complex I assembly; electron transport coupled proton transport	NADH dehydrogenase (ubiquinone) activity; NADH dehydrogenase activity; ubiquinone binding	membrane; integral component of membrane; mitochondrion; respirasome; mitochondrial membrane; mitochondrial respiratory chain complex I; mitochondrial inner membrane
LGALS3	2.91218e-09	0.142059	0.114	0.041	0.000106589	mRNA processing; RNA splicing; cell differentiation; immune system process; innate immune response; monocyte chemotaxis; neutrophil chemotaxis; eosinophil chemotaxis; neutrophil degranulation; epithelial cell differentiation; positive chemotaxis; positive regulation of mononuclear cell migration; positive regulation of protein localization to plasma membrane; regulation of myeloid cell differenti…	RNA binding; carbohydrate binding; protein binding; protein phosphatase binding; laminin binding; chemoattractant activity; IgE binding; protein phosphatase inhibitor activity	cytoplasm; nucleus; membrane; mitochondrial inner membrane; extracellular space; spliceosomal complex; extracellular region; plasma membrane; extracellular exosome; collagen-containing extracellular matrix; cell surface; secretory granule membrane; ficolin-1-rich granule membrane; immunological synapse
CD24	2.9404e-09	0.347148	0.365	0.247	0.000107621	cell adhesion; Wnt signaling pathway; positive regulation of protein tyrosine kinase activity; cell migration; response to hypoxia; response to molecule of bacterial origin; positive regulation of cytosolic calcium ion concentration; intrinsic apoptotic signaling pathway; response to estrogen; cholesterol homeostasis; cell-cell adhesion; regulation of epithelial cell differentiation; glomerular v…	protein binding; protein kinase binding; protein tyrosine kinase activator activity	membrane; plasma membrane; membrane raft; cell surface; anchored component of membrane; anchored component of external side of plasma membrane; intracellular membrane-bounded organelle
GRIN2B	2.97098e-09	0.100725	0.111	0.038	0.000108741	negative regulation of dendritic spine maintenance; ion transport; ionotropic glutamate receptor signaling pathway; MAPK cascade; modulation of chemical synaptic transmission; ephrin receptor signaling pathway; chemical synaptic transmission; synaptic transmission, glutamatergic; excitatory postsynaptic potential; brain development; calcium-mediated signaling; regulation of synaptic plasticity; l…	metal ion binding; ion channel activity; zinc ion binding; protein binding; signaling receptor activity; ionotropic glutamate receptor activity; ligand-gated ion channel activity; amyloid-beta binding; glutamate receptor activity; NMDA glutamate receptor activity; glutamate-gated calcium ion channel activity; transmitter-gated ion channel activity involved in regulation of postsynaptic membrane p…	cytoplasm; membrane; integral component of membrane; plasma membrane; cell junction; synapse; postsynaptic membrane; integral component of plasma membrane; postsynaptic density; cell surface; NMDA selective glutamate receptor complex; postsynaptic density membrane; neuron projection; synaptic membrane
MLC1	3.11549e-09	-0.144185	0.078	0.181	0.00011403	ion transport; vesicle-mediated transport; protein complex oligomerization; cellular response to cholesterol; caveolin-mediated endocytosis; positive regulation of intracellular transport; regulation of response to osmotic stress; protein transport	protein binding; protein-containing complex binding	cytoplasm; membrane; integral component of membrane; endoplasmic reticulum; plasma membrane; caveola; perinuclear region of cytoplasm; cytoplasmic vesicle; membrane raft; lysosome; endosome; early endosome; basolateral plasma membrane; recycling endosome; cell-cell junction; apical plasma membrane
RDH10	3.24083e-09	0.120741	0.157	0.07	0.000118618	oxidation-reduction process; metanephros development; in utero embryonic development; retinoic acid biosynthetic process; gonad development; animal organ morphogenesis; neural crest cell development; embryonic camera-type eye development; embryonic forelimb morphogenesis; retinol metabolic process; ear development; nose development; embryonic organ development; embryonic viscerocranium morphogene…	oxidoreductase activity; retinol dehydrogenase activity; NADP-retinol dehydrogenase activity	cytoplasm; membrane; integral component of membrane; endoplasmic reticulum; endoplasmic reticulum membrane; organelle membrane; intracellular membrane-bounded organelle; lipid droplet
FTH1	3.38216e-09	0.134665	0.998	0.999	0.00012379	cellular iron ion homeostasis; iron ion transport; oxidation-reduction process; immune response; negative regulation of cell population proliferation; neutrophil degranulation; negative regulation of fibroblast proliferation; intracellular sequestering of iron ion	metal ion binding; ferric iron binding; oxidoreductase activity; protein binding; iron ion binding; ferroxidase activity; identical protein binding; ferrous iron binding	cell; nucleus; extracellular region; cytoplasm; cytosol; extracellular exosome; ficolin-1-rich granule lumen; tertiary granule lumen; intracellular ferritin complex; autolysosome; membrane; integral component of membrane
MTRNR2L8	3.47562e-09	0.198648	0.361	0.24	0.000127211	negative regulation of signaling receptor activity; negative regulation of execution phase of apoptosis	receptor antagonist activity	cytoplasm; extracellular region
KIF9	3.70475e-09	0.155813	0.254	0.149	0.000135598	microtubule-based movement; extracellular matrix disassembly; organelle disassembly; regulation of podosome assembly	nucleotide binding; ATP binding; microtubule motor activity; protein binding; microtubule binding; ATPase activity; protein dimerization activity; motor activity	cytoplasm; cytoskeleton; microtubule; podosome; kinesin complex; vesicle
TMEM132A	4.1529e-09	-0.184175	0.349	0.488	0.000152	cellular protein metabolic process; post-translational protein modification		membrane; integral component of membrane; endoplasmic reticulum; endoplasmic reticulum membrane; Golgi apparatus; Golgi membrane; extracellular exosome; endoplasmic reticulum lumen
NDUFC2	4.27223e-09	-0.192451	0.979	0.987	0.000156368	oxidation-reduction process; mitochondrial electron transport, NADH to ubiquinone; mitochondrial respiratory chain complex I assembly; neutrophil degranulation	NADH dehydrogenase (ubiquinone) activity	membrane; integral component of membrane; mitochondrion; mitochondrial inner membrane; respirasome; plasma membrane; cytoplasm; mitochondrial respiratory chain complex I; azurophil granule membrane
HIST1H4D	4.38257e-09	-0.132894	0.103	0.216	0.000160406	nucleosome assembly; DNA-templated transcription, initiation; cellular protein metabolic process; regulation of gene silencing by miRNA; CENP-A containing nucleosome assembly; regulation of megakaryocyte differentiation; DNA replication-dependent nucleosome assembly; DNA replication-independent nucleosome assembly; chromatin silencing at rDNA; negative regulation of gene expression, epigenetic; p…	RNA binding; DNA binding; protein heterodimerization activity; protein binding; protein domain specific binding	nucleus; membrane; nucleosome; chromosome; extracellular region; nucleoplasm; extracellular exosome; protein-containing complex; nuclear chromosome, telomeric region; nuclear chromosome; nuclear nucleosome
SQLE	5.76076e-09	-0.256147	0.892	0.927	0.00021085	oxidation-reduction process; sterol biosynthetic process; regulation of cell population proliferation; lipid droplet formation; regulation of cholesterol biosynthetic process; cholesterol metabolic process; cholesterol biosynthetic process; cellular aromatic compound metabolic process; response to organic substance	flavin adenine dinucleotide binding; squalene monooxygenase activity; oxidoreductase activity; protein binding; FAD binding	membrane; integral component of membrane; endoplasmic reticulum; endoplasmic reticulum membrane; organelle membrane; intracellular membrane-bounded organelle
RPL36	5.94359e-09	-0.156742	1	1	0.000217541	translation; cytoplasmic translation; viral transcription; translational initiation; nuclear-transcribed mRNA catabolic process, nonsense-mediated decay; SRP-dependent cotranslational protein targeting to membrane	RNA binding; structural constituent of ribosome	cytoplasm; membrane; ribosome; cytosol; nucleolus; cytosolic large ribosomal subunit; polysomal ribosome; intracellular
DOK5	5.9588e-09	-0.189447	0.639	0.78	0.000218098	axon guidance; transmembrane receptor protein tyrosine kinase signaling pathway; neuron differentiation; positive regulation of MAPK cascade; regulation of neurotrophin TRK receptor signaling pathway		cytosol
ZFAND6	6.01656e-09	0.236493	0.715	0.641	0.000220212	protein transport; negative regulation of apoptotic process; apoptotic process; cellular response to tumor necrosis factor; protein targeting to peroxisome; regulation of I-kappaB kinase/NF-kappaB signaling	zinc ion binding; metal ion binding; DNA binding; protein binding; polyubiquitin modification-dependent protein binding	cytoplasm; cytosol
C1QL1	6.09128e-09	-0.118919	0.116	0.234	0.000222947	locomotory behavior; neuron remodeling; motor learning; maintenance of synapse structure	protein binding; signaling receptor binding	extracellular region; collagen trimer; cytoplasm; synaptic cleft; climbing fiber; presynapse
APLP2	6.20552e-09	0.197418	0.894	0.875	0.000227128	negative regulation of endopeptidase activity; G protein-coupled receptor signaling pathway; negative regulation of peptidase activity; cellular protein metabolic process; post-translational protein modification; platelet degranulation	metal ion binding; DNA binding; serine-type endopeptidase inhibitor activity; protein binding; heparin binding; identical protein binding; transition metal ion binding; peptidase inhibitor activity	nucleus; membrane; integral component of membrane; plasma membrane; extracellular exosome; endoplasmic reticulum lumen; platelet alpha granule membrane
SHC3	6.95394e-09	0.113959	0.181	0.087	0.000254521	intracellular signal transduction; signal transduction; central nervous system development; MAPK cascade; axon guidance; transmembrane receptor protein tyrosine kinase signaling pathway; epidermal growth factor receptor signaling pathway; Ras protein signal transduction; learning or memory; synaptic transmission, glutamatergic	protein binding; protein kinase binding; phosphotyrosine residue binding; receptor tyrosine kinase binding	plasma membrane; cytosol
TCF7L2	7.67645e-09	0.22926	0.543	0.439	0.000280966	response to glucose; positive regulation of protein kinase B signaling; negative regulation of DNA-binding transcription factor activity; positive regulation of transcription by RNA polymerase II; glucose homeostasis; Wnt signaling pathway; regulation of transcription, DNA-templated; regulation of transcription by RNA polymerase II; canonical Wnt signaling pathway; negative regulation of canonica…	DNA binding; protein binding; sequence-specific DNA binding; DNA-binding transcription factor activity; DNA-binding transcription factor activity, RNA polymerase II-specific; protein kinase binding; armadillo repeat domain binding; beta-catenin binding; transcription regulatory region DNA binding; chromatin binding; RNA polymerase II repressing transcription factor binding; RNA polymerase II prox…	nucleus; transcription factor complex; nucleoplasm; PML body; nuclear chromatin; protein-DNA complex; beta-catenin-TCF7L2 complex
SPATA6	7.87494e-09	0.151854	0.347	0.227	0.000288231	multicellular organism development; cell differentiation; spermatogenesis; motile cilium assembly	myosin light chain binding	motile cilium; cell projection; extracellular region; cilium; sperm connecting piece
HIST1H2AI	8.10832e-09	-0.119024	0.059	0.153	0.000296773	chromatin organization	DNA binding; protein heterodimerization activity; protein binding; enzyme binding	nucleus; nucleosome; chromosome; nuclear chromatin; extracellular exosome
PTGFRN	8.32497e-09	-0.129914	0.179	0.31	0.000304702	myoblast fusion involved in skeletal muscle regeneration; lipid droplet organization	protein binding	membrane; integral component of membrane; endoplasmic reticulum; endoplasmic reticulum membrane; Golgi apparatus; cell surface
CCDC167	8.66097e-09	0.228347	0.814	0.735	0.000317			membrane; integral component of membrane
LIMA1	8.66962e-09	-0.178813	0.326	0.465	0.000317317	actin filament bundle assembly; negative regulation of actin filament depolymerization; lipid metabolic process; steroid metabolic process; cholesterol metabolic process; cell migration; cholesterol homeostasis; ruffle organization; intestinal cholesterol absorption	metal ion binding; actin filament binding; actin binding; protein binding; cadherin binding; actin monomer binding	plasma membrane; focal adhesion; actin cytoskeleton; cytoplasm; membrane; cytosol; cytoskeleton; cell junction; stress fiber; cleavage furrow; ruffle; brush border membrane; brush border
CARHSP1	8.68402e-09	0.285268	0.93	0.934	0.000317844	regulation of transcription by RNA polymerase II; intracellular signal transduction; regulation of mRNA stability	nucleic acid binding; RNA binding; protein binding; DNA-binding transcription factor activity, RNA polymerase II-specific; phosphatase binding; mRNA 3'-UTR binding	cytoplasm; cytosol; P-body; cytoplasmic exosome (RNase complex); P granule
CALM3	9.32252e-09	0.193097	0.959	0.942	0.000341214	phosphorylation; calcium-mediated signaling; regulation of release of sequestered calcium ion into cytosol by sarcoplasmic reticulum; regulation of cardiac muscle contraction by regulation of the release of sequestered calcium ion; regulation of heart rate; G protein-coupled receptor signaling pathway; G2/M transition of mitotic cell cycle; response to amphetamine; activation of adenylate cyclase…	metal ion binding; kinase activity; calcium ion binding; protein binding; adenylate cyclase binding; protein domain specific binding; nitric-oxide synthase regulator activity; type 3 metabotropic glutamate receptor binding; phosphatidylinositol 3-kinase binding; ion channel binding; protein N-terminus binding; calcium-dependent protein binding; nitric-oxide synthase binding; protein kinase bindin…	nucleus; cytoplasm; plasma membrane; cytoskeleton; spindle pole; centrosome; microtubule organizing center; spindle; voltage-gated potassium channel complex; growth cone; synaptic vesicle membrane; mitochondrial membrane; neuron projection; myelin sheath; spindle microtubule; protein-containing complex; vesicle; calcium channel complex; sarcomere; catalytic complex
F3	9.63254e-09	0.146036	0.171	0.082	0.000352561	positive regulation of angiogenesis; positive regulation of protein kinase B signaling; positive regulation of platelet-derived growth factor receptor signaling pathway; activation of cysteine-type endopeptidase activity involved in apoptotic process; positive regulation of cell migration; blood coagulation; hemostasis; cytokine-mediated signaling pathway; positive regulation of endothelial cell …	protein binding; cytokine receptor activity; protease binding; phospholipid binding; serine-type endopeptidase activity	extracellular space; membrane; integral component of membrane; extracellular region; cell surface; plasma membrane; collagen-containing extracellular matrix; intrinsic component of external side of plasma membrane; serine-type peptidase complex
EFHC1	9.78746e-09	0.198619	0.419	0.304	0.000358231	mitotic spindle organization; regulation of cell division; mitotic cytokinesis; cerebral cortex cell migration; cilium-dependent cell motility	calcium ion binding; protein binding; alpha-tubulin binding; protein C-terminus binding	cytoplasm; cytoskeleton; spindle pole; centrosome; microtubule organizing center; spindle; mitotic spindle; axoneme; neuronal cell body
STON2	1.0084e-08	-0.113818	0.096	0.203	0.000369083	endocytosis; regulation of endocytosis; synaptic vesicle recycling; membrane organization; synaptic vesicle endocytosis; hematopoietic progenitor cell differentiation	protein binding	cytoplasm; membrane; nucleolus; cytosol; cell junction; synapse; neuron projection; synaptic vesicle; clathrin-coated vesicle; presynapse; cell
THOC7	1.01048e-08	0.203836	0.701	0.626	0.000369847	mRNA processing; RNA splicing; mRNA transport; mRNA export from nucleus; RNA export from nucleus; mRNA 3'-end processing; viral mRNA export from host cell nucleus	RNA binding; protein binding	nucleus; cytoplasm; nuclear speck; cytosol; THO complex part of transcription export complex; nucleoplasm; nuclear chromosome, telomeric region; transcription export complex; THO complex
SOX12	1.04271e-08	-0.160858	0.284	0.421	0.000381644	regulation of transcription by RNA polymerase II; regulation of transcription, DNA-templated; cell differentiation; positive regulation of transcription by RNA polymerase II; spinal cord development; cell fate commitment; protein-DNA complex assembly	transcription coactivator activity; DNA binding; DNA-binding transcription factor activity, RNA polymerase II-specific; transcription regulatory region sequence-specific DNA binding; DNA-binding transcription activator activity, RNA polymerase II-specific	nucleus; nucleoplasm; nuclear transcription factor complex; nuclear chromatin; protein-DNA complex
MORN2	1.06513e-08	0.216386	0.569	0.466	0.000389847	cell differentiation; spermatogenesis	protein binding	nucleus; cytoplasmic vesicle; acrosomal vesicle
THRA	1.07707e-08	-0.14176	0.227	0.363	0.000394219	regulation of transcription, DNA-templated; intracellular receptor signaling pathway; steroid hormone mediated signaling pathway; animal organ morphogenesis; cell differentiation; positive regulation of transcription by RNA polymerase II; negative regulation of transcription by RNA polymerase II; transcription by RNA polymerase II; hormone-mediated signaling pathway; multicellular organism develo…	zinc ion binding; DNA-binding transcription factor activity; sequence-specific DNA binding; metal ion binding; DNA binding; nuclear receptor activity; transcription regulatory region DNA binding; protein binding; steroid hormone receptor activity; DNA-binding transcription factor activity, RNA polymerase II-specific; RNA polymerase II regulatory region sequence-specific DNA binding; transcription…	nucleus; cytoplasm; cytosol; nuclear chromatin; nucleoplasm; RNA polymerase II transcription factor complex
RIC3	1.12786e-08	0.140125	0.134	0.057	0.000412809	synaptic transmission, cholinergic; protein folding; protein localization to cell surface; positive regulation of cytosolic calcium ion concentration; cellular protein-containing complex assembly	acetylcholine receptor binding; protein folding chaperone	membrane; integral component of membrane; endoplasmic reticulum; endoplasmic reticulum membrane; Golgi apparatus; Golgi membrane; intracellular membrane-bounded organelle; neuron projection; neuronal cell body
CAPZB	1.21292e-08	0.230591	0.819	0.801	0.000443939	barbed-end actin filament capping; actin filament capping; actin cytoskeleton organization; cytoskeleton organization; regulation of cell morphogenesis; antigen processing and presentation of exogenous peptide antigen via MHC class II; endoplasmic reticulum to Golgi vesicle-mediated transport; blood coagulation; cell morphogenesis; regulation of lamellipodium assembly; negative regulation of filo…	actin binding; protein binding; actin filament binding; cadherin binding	cytoplasm; F-actin capping protein complex; cytoskeleton; cytosol; extracellular exosome; WASH complex; actin cytoskeleton; sarcomere; brush border; postsynaptic density; membrane; lamellipodium; cortical cytoskeleton; asymmetric synapse; Schaffer collateral - CA1 synapse; hippocampal mossy fiber to CA3 synapse
FAM20C	1.31888e-08	-0.104614	0.067	0.162	0.000482723	phosphorylation; protein phosphorylation; biomineral tissue development; cellular protein metabolic process; post-translational protein modification; skeletal system development; positive regulation of bone mineralization; osteoclast maturation; regulation of fibroblast growth factor receptor signaling pathway; positive regulation of osteoblast differentiation; ATP metabolic process; regulation o…	metal ion binding; nucleotide binding; protein serine/threonine kinase activity; ATP binding; kinase activity; transferase activity; protein binding; manganese ion binding; phosphotransferase activity, alcohol group as acceptor; calcium ion binding	Golgi apparatus; extracellular space; extracellular region; extracellular exosome; endoplasmic reticulum lumen; cytoplasm
ST6GALNAC5	1.49314e-08	0.167225	0.321	0.206	0.000546505	protein glycosylation; sialylation; oligosaccharide biosynthetic process; ganglioside biosynthetic process; glycosphingolipid biosynthetic process	transferase activity; sialyltransferase activity; transferase activity, transferring glycosyl groups; alpha-N-acetylgalactosaminide alpha-2,6-sialyltransferase activity	membrane; integral component of membrane; Golgi apparatus; Golgi membrane
PLCB1	1.56786e-08	-0.159367	0.385	0.534	0.000573851	intracellular signal transduction; signal transduction; lipid metabolic process; lipid catabolic process; regulation of cell cycle; brain development; positive regulation of G1/S transition of mitotic cell cycle; positive regulation of transcription, DNA-templated; positive regulation of GTPase activity; G protein-coupled receptor signaling pathway; memory; positive regulation of interleukin-12 p…	hydrolase activity; calcium ion binding; phosphoric diester hydrolase activity; phosphatidylinositol phospholipase C activity; protein binding; calmodulin binding; protein homodimerization activity; enzyme binding; GTPase activator activity; phospholipase C activity; phosphatidylinositol-4,5-bisphosphate binding; lamin binding	nucleus; cytoplasm; membrane; postsynapse; cytosol; extracellular exosome; nuclear membrane; nuclear speck; nuclear chromatin; protein-containing complex; glutamatergic synapse; GABA-ergic synapse
TLE4	1.64794e-08	0.272591	0.708	0.631	0.000603162	regulation of transcription, DNA-templated; Wnt signaling pathway; negative regulation of canonical Wnt signaling pathway; beta-catenin-TCF complex assembly; negative regulation of transcription by RNA polymerase II; negative regulation of transcription, DNA-templated; cellular response to leukemia inhibitory factor	protein binding; transcription corepressor activity; repressing transcription factor binding; DNA-binding transcription factor activity, RNA polymerase II-specific; chromatin binding	nucleus; transcription factor complex; nucleoplasm; beta-catenin-TCF complex
SEPTIN6	1.65446e-08	0.184396	0.385	0.267	0.00060555	cell division; cell cycle; cell differentiation; spermatogenesis; cilium assembly; viral process; cytoskeleton-dependent cytokinesis; mitotic cytokinesis	nucleotide binding; GTP binding; protein binding; GTPase activity	cytoplasm; motile cilium; chromosome; cytoskeleton; cell projection; septin complex; spindle; midbody; chromosome, centromeric region; kinetochore; condensed chromosome kinetochore; cilium; cleavage furrow; microtubule cytoskeleton; septin ring; sperm annulus; synaptic vesicle; septin collar; axon terminus; presynapse
FAM172A	2.10054e-08	-0.159907	0.347	0.483	0.00076882	mRNA processing; RNA splicing; regulation of alternative mRNA splicing, via spliceosome; neural crest cell development; chromatin silencing by small RNA	siRNA binding	nucleus; cytoplasm; endoplasmic reticulum
ST8SIA4	2.11662e-08	0.134258	0.277	0.168	0.000774705	protein glycosylation; sialylation; nervous system development; cellular protein modification process; ganglioside biosynthetic process; N-glycan processing; oligosaccharide metabolic process	transferase activity; sialyltransferase activity; transferase activity, transferring glycosyl groups; alpha-N-acetylneuraminate alpha-2,8-sialyltransferase activity; sialic acid binding	membrane; integral component of membrane; Golgi apparatus; Golgi membrane
COL9A1	2.13406e-08	-0.125179	0.145	0.269	0.000781088	extracellular matrix organization; animal organ morphogenesis	metal ion binding; extracellular matrix structural constituent; extracellular matrix structural constituent conferring tensile strength	extracellular region; collagen trimer; extracellular space; extracellular matrix; collagen-containing extracellular matrix; endoplasmic reticulum lumen; collagen type IX trimer
LTBP4	2.1374e-08	-0.15193	0.375	0.521	0.000782308	multicellular organism development; regulation of proteolysis; protein folding; regulation of cell growth; regulation of cell differentiation; regulation of transforming growth factor beta receptor signaling pathway; growth hormone secretion; transforming growth factor beta receptor signaling pathway; hormone secretion	calcium ion binding; protein binding; integrin binding; extracellular matrix structural constituent; growth factor binding; glycosaminoglycan binding; transforming growth factor beta binding; transforming growth factor beta-activated receptor activity	extracellular space; extracellular region; collagen-containing extracellular matrix; extracellular matrix
RPL13	2.33319e-08	-0.149728	1	1	0.00085397	translation; viral transcription; translational initiation; nuclear-transcribed mRNA catabolic process, nonsense-mediated decay; SRP-dependent cotranslational protein targeting to membrane	RNA binding; structural constituent of ribosome; protein binding	nucleus; membrane; endoplasmic reticulum; nucleolus; cytosol; ribosome; cytosolic large ribosomal subunit; cytosolic ribosome; intracellular
GGH	2.3923e-08	-0.164616	0.643	0.76	0.000875605	proteolysis; neutrophil degranulation; response to zinc ion; response to insulin; response to drug; response to ethanol; tetrahydrofolylpolyglutamate metabolic process	hydrolase activity; exopeptidase activity; omega peptidase activity; gamma-glutamyl-peptidase activity	nucleus; extracellular space; extracellular region; melanosome; lysosome; extracellular exosome; specific granule lumen; tertiary granule lumen; azurophil granule lumen; vacuole; cytosol
COL9A3	2.40736e-08	-0.126074	0.077	0.173	0.000881118	extracellular matrix organization; male gonad development; female gonad development	extracellular matrix structural constituent; extracellular matrix structural constituent conferring tensile strength	extracellular region; collagen trimer; extracellular space; extracellular matrix; collagen-containing extracellular matrix; endoplasmic reticulum lumen; collagen type IX trimer
MID1	2.54317e-08	-0.209702	0.457	0.566	0.000930825	positive regulation of stress-activated MAPK cascade; pattern specification process; interferon-gamma-mediated signaling pathway; microtubule cytoskeleton organization; protein localization to microtubule; negative regulation of microtubule depolymerization	zinc ion binding; metal ion binding; transferase activity; protein homodimerization activity; protein binding; microtubule binding; identical protein binding; ubiquitin protein ligase binding; protein heterodimerization activity; phosphoprotein binding	cytoplasm; cytoskeleton; microtubule; spindle; cytosol; microtubule associated complex; cytoplasmic microtubule; intracellular; membrane; integral component of membrane; microtubule cytoskeleton
GNAI2	2.6366e-08	-0.189433	0.935	0.959	0.000965021	positive regulation of cell population proliferation; G protein-coupled receptor signaling pathway; signal transduction; cell division; cell cycle; adenylate cyclase-modulating G protein-coupled receptor signaling pathway; protein folding; adenylate cyclase-inhibiting G protein-coupled receptor signaling pathway; response to nutrient; negative regulation of adenylate cyclase activity; gamma-amino…	metal ion binding; nucleotide binding; GTPase activity; GTP binding; protein binding; guanyl nucleotide binding; G-protein beta/gamma-subunit complex binding; G protein-coupled receptor binding	cytoplasm; membrane; cytosol; nucleoplasm; plasma membrane; cytoskeleton; heterotrimeric G-protein complex; centrosome; microtubule organizing center; midbody; extracellular exosome; extracellular vesicle; nucleus; dendrite; cell body; membrane raft
SNX18	2.77492e-08	0.146521	0.238	0.137	0.00101565	protein transport; cell division; cell cycle; mitotic cell cycle; positive regulation of GTPase activity; endocytosis; endosomal transport; mitotic cytokinesis; cleavage furrow formation	protein binding; phosphatidylinositol binding; lipid binding; phosphatidylinositol-4,5-bisphosphate binding	membrane; plasma membrane; cytoplasmic vesicle; cytoplasmic vesicle membrane; endosome; clathrin-coated vesicle; extrinsic component of cytoplasmic side of plasma membrane; extracellular exosome; endosome membrane; endomembrane system
FBXO32	2.89871e-08	-0.213325	0.096	0.195	0.00106096	protein ubiquitination; response to denervation involved in regulation of muscle adaptation; cellular response to dexamethasone stimulus; protein polyubiquitination; post-translational protein modification	protein binding	nucleus; cytoplasm; cytosol; nucleoplasm; Z disc; SCF ubiquitin ligase complex
TENM4	3.11021e-08	-0.170864	0.302	0.439	0.00113837	signal transduction; multicellular organism development; cell differentiation; neuron development; regulation of myelination; heterophilic cell-cell adhesion via plasma membrane cell adhesion molecules; positive regulation of oligodendrocyte differentiation; positive regulation of gastrulation; positive regulation of myelination; gastrulation with mouth forming second; central nervous system myel…	protein homodimerization activity; protein heterodimerization activity; cell adhesion molecule binding; identical protein binding	nucleus; cytoplasm; membrane; integral component of membrane; plasma membrane; cell projection; neuron projection; integral component of plasma membrane
HSP90B1	3.19683e-08	0.237225	0.951	0.962	0.00117007	protein folding; protein transport; negative regulation of apoptotic process; receptor-mediated endocytosis; retrograde protein transport, ER to cytosol; cellular protein metabolic process; post-translational protein modification; response to hypoxia; ubiquitin-dependent ERAD pathway; toll-like receptor signaling pathway; cytokine-mediated signaling pathway; response to endoplasmic reticulum stre…	ATP binding; unfolded protein binding; RNA binding; nucleotide binding; protein binding; calcium ion binding; low-density lipoprotein particle receptor binding; protein phosphatase binding	nucleus; membrane; endoplasmic reticulum; endoplasmic reticulum membrane; cytosol; melanosome; perinuclear region of cytoplasm; focal adhesion; midbody; extracellular region; endoplasmic reticulum lumen; extracellular exosome; collagen-containing extracellular matrix; sarcoplasmic reticulum; protein-containing complex; sarcoplasmic reticulum lumen; endocytic vesicle lumen; plasma membrane; endopl…
NFE2L2	3.3282e-08	-0.216016	0.538	0.664	0.00121815	negative regulation of endothelial cell apoptotic process; cellular response to laminar fluid shear stress; positive regulation of transcription by RNA polymerase II; cellular response to tumor necrosis factor; regulation of transcription, DNA-templated; protein ubiquitination; positive regulation of transcription, DNA-templated; viral process; cellular response to oxidative stress; transcription…	DNA binding; DNA-binding transcription factor activity; protein binding; DNA-binding transcription factor activity, RNA polymerase II-specific; transcription regulatory region sequence-specific DNA binding; protein domain specific binding; RNA polymerase II activating transcription factor binding; transcription regulatory region DNA binding; RNA polymerase II distal enhancer sequence-specific DNA…	nucleus; cytoplasm; Golgi apparatus; centrosome; cytosol; nucleoplasm; plasma membrane; nuclear chromatin; protein-DNA complex; chromatin
NIT2	3.44348e-08	-0.132243	0.263	0.402	0.00126035	nitrogen compound metabolic process; neutrophil degranulation; glutamine metabolic process; oxaloacetate metabolic process; asparagine metabolic process	hydrolase activity; omega-amidase activity	cytoplasm; centrosome; cytosol; extracellular region; extracellular exosome; specific granule lumen; tertiary granule lumen
POLE4	3.44712e-08	-0.187226	0.362	0.5	0.00126168	DNA biosynthetic process; regulation of transcription, DNA-templated; G1/S transition of mitotic cell cycle; histone H3 acetylation; DNA replication initiation; telomere maintenance via semi-conservative replication	transferase activity; DNA binding; protein heterodimerization activity; protein binding; nucleotidyltransferase activity; DNA-directed DNA polymerase activity; DNA-binding transcription factor activity	nucleus; nucleoplasm; Ada2/Gcn5/Ada3 transcription activator complex; epsilon DNA polymerase complex
MT-ND4L	3.6e-08	0.224483	0.842	0.804	0.00131763	oxidation-reduction process; ATP synthesis coupled electron transport; mitochondrial electron transport, NADH to ubiquinone	oxidoreductase activity; oxidoreductase activity, acting on NAD(P)H; NADH dehydrogenase (ubiquinone) activity	membrane; integral component of membrane; mitochondrion; respirasome; mitochondrial membrane; mitochondrial respiratory chain complex I; NADH dehydrogenase complex
RPL10	3.61659e-08	-0.137324	1	1	0.00132371	translation; multicellular organism development; ribosomal large subunit assembly; regulation of translation; viral transcription; translational initiation; nuclear-transcribed mRNA catabolic process, nonsense-mediated decay; SRP-dependent cotranslational protein targeting to membrane; negative regulation of transcription by RNA polymerase II; negative regulation of apoptotic process; embryonic b…	RNA binding; structural constituent of ribosome; protein binding; translation regulator activity	membrane; endoplasmic reticulum; cytosol; ribosome; cytosolic large ribosomal subunit; protein-containing complex; nucleus; smooth endoplasmic reticulum; intracellular
CHIC2	3.77052e-08	0.164585	0.266	0.164	0.00138005		protein binding	membrane; intracellular membrane-bounded organelle; plasma membrane; cytoplasmic vesicle; Golgi-associated vesicle; Golgi apparatus
PABPN1	3.9835e-08	-0.175673	0.564	0.668	0.001458	mRNA processing; cellular response to lipopolysaccharide; positive regulation of polynucleotide adenylyltransferase activity; mRNA 3'-end processing; muscle contraction; MAPK cascade; mRNA splicing, via spliceosome; RNA processing; termination of RNA polymerase II transcription; poly(A)+ mRNA export from nucleus; modification by virus of host mRNA processing	nucleic acid binding; RNA binding; protein binding; RNA polymerase binding	nucleus; cytoplasm; nuclear speck; nucleoplasm; ribonucleoprotein complex; nuclear inclusion body
EIF4A1	4.55967e-08	-0.174544	0.971	0.981	0.00166889	translation; translational initiation; viral process; cytoplasmic translational initiation	nucleic acid binding; ATP binding; nucleotide binding; hydrolase activity; helicase activity; RNA binding; translation initiation factor activity; protein binding; RNA helicase activity; mRNA binding; RNA cap binding; double-stranded RNA binding; translation factor activity, RNA binding	cytoplasm; membrane; cytosol; extracellular exosome; eukaryotic translation initiation factor 4F complex
PDLIM1	4.58732e-08	0.186085	0.37	0.259	0.00167901	positive regulation of nucleic acid-templated transcription; actin cytoskeleton organization; response to hypoxia; regulation of transcription by RNA polymerase II; response to oxidative stress; heart development; muscle structure development; cell-cell adhesion	metal ion binding; transcription coactivator activity; actin binding; muscle alpha-actinin binding; cadherin binding involved in cell-cell adhesion; protein binding	cytoplasm; cytoskeleton; focal adhesion; filamentous actin; stress fiber; transcription factor complex; cell-cell adherens junction; Z disc
PRXL2A	4.65358e-08	0.241813	0.832	0.765	0.00170325	oxidation-reduction process; cellular oxidant detoxification; regulation of osteoclast differentiation	antioxidant activity	cytoplasm; extracellular region
AL162231.1	5.03024e-08	0.164153	0.38	0.267	0.00184112
JUN	5.43476e-08	-0.340948	0.778	0.817	0.00198918	positive regulation of vascular smooth muscle cell proliferation; transforming growth factor beta receptor signaling pathway; positive regulation of transcription by RNA polymerase II; positive regulation of transcription, DNA-templated; regulation of transcription, DNA-templated; positive regulation of GTPase activity; Fc-epsilon receptor signaling pathway; negative regulation of transcription b…	transcription regulatory region DNA binding; RNA binding; DNA binding; DNA-binding transcription factor activity; protein binding; GTPase activator activity; transcription coactivator activity; identical protein binding; DNA-binding transcription factor activity, RNA polymerase II-specific; RNA polymerase II proximal promoter sequence-specific DNA binding; transcription factor binding; DNA-bindin…	nucleus; nucleoplasm; nuclear chromatin; transcription factor complex; transcription factor AP-1 complex; nuclear chromosome; nuclear euchromatin; cytosol; transcriptional repressor complex
FABP5	5.59073e-08	-0.163475	0.931	0.959	0.00204626	triglyceride catabolic process; neutrophil degranulation; glucose metabolic process; lipid metabolic process; phosphatidylcholine biosynthetic process; negative regulation of glucose transmembrane transport; regulation of prostaglandin biosynthetic process; positive regulation of peroxisome proliferator activated receptor signaling pathway; glucose homeostasis; regulation of sensory perception of…	lipid binding; protein binding; identical protein binding; retinoic acid binding; fatty acid binding	nucleus; cytoplasm; membrane; plasma membrane; extracellular region; cell junction; synapse; postsynaptic membrane; nucleoplasm; cytosol; extracellular exosome; postsynaptic density; extracellular space; secretory granule membrane; azurophil granule lumen
PRDX6	5.80475e-08	0.205283	0.922	0.916	0.0021246	oxidation-reduction process; lipid metabolic process; lipid catabolic process; cell redox homeostasis; metabolic process; cellular oxidant detoxification; neutrophil degranulation; cellular response to oxidative stress; response to oxidative stress; hydrogen peroxide catabolic process; glycerophospholipid catabolic process; positive regulation of mRNA splicing, via spliceosome	oxidoreductase activity; hydrolase activity; protein binding; catalytic activity; phospholipase A2 activity; phospholipase A2 activity (consuming 1,2-dipalmitoylphosphatidylcholine); phospholipase A2 activity consuming 1,2-dioleoylphosphatidylethanolamine); peroxidase activity; peroxiredoxin activity; antioxidant activity; cadherin binding; ubiquitin protein ligase binding; protein homodimerizati…	cytoplasm; cell; nucleus; membrane; extracellular space; cytosol; perinuclear region of cytoplasm; lysosome; extracellular region; extracellular exosome; azurophil granule lumen
TXNIP	5.80545e-08	-0.368103	0.692	0.792	0.00212485	cell cycle; negative regulation of transcription by RNA polymerase II; protein import into nucleus; response to oxidative stress; response to mechanical stimulus; response to glucose; response to estradiol; response to progesterone; regulation of cell population proliferation; response to drug; response to hydrogen peroxide; positive regulation of apoptotic process; negative regulation of catalyt…	protein binding; enzyme inhibitor activity; ubiquitin protein ligase binding	cytoplasm; nucleus; mitochondrial intermembrane space; cytosol
SHD	5.99139e-08	0.198333	0.266	0.165	0.00219291		protein binding; phosphotyrosine residue binding
SCD	6.191e-08	-0.266973	0.69	0.781	0.00226597	oxidation-reduction process; lipid metabolic process; fatty acid metabolic process; fatty acid biosynthetic process; unsaturated fatty acid biosynthetic process; positive regulation of cold-induced thermogenesis; regulation of cholesterol biosynthetic process; fatty-acyl-CoA biosynthetic process; response to fatty acid	metal ion binding; oxidoreductase activity; protein binding; iron ion binding; stearoyl-CoA 9-desaturase activity; oxidoreductase activity, acting on paired donors, with oxidation of a pair of donors resulting in the reduction of molecular oxygen to two molecules of water; palmitoyl-CoA 9-desaturase activity	membrane; integral component of membrane; endoplasmic reticulum; nucleolus; endoplasmic reticulum membrane; integral component of endoplasmic reticulum membrane
TPM3	6.84359e-08	0.262097	0.842	0.826	0.00250482	actin filament organization; muscle contraction; muscle filament sliding	actin binding; protein binding; actin filament binding	cytoplasm; cytosol; actin cytoskeleton; cytoskeleton; extracellular exosome; actin filament; stress fiber; muscle thin filament tropomyosin
STRADB	6.88688e-08	0.131161	0.21	0.119	0.00252067	protein phosphorylation; cell cycle; cell morphogenesis; JNK cascade; negative regulation of extrinsic apoptotic signaling pathway in absence of ligand; signal transduction by protein phosphorylation; activation of protein kinase activity; cell cycle arrest; protein export from nucleus	protein kinase activity; ATP binding; nucleotide binding; protein binding; protein serine/threonine kinase activity	membrane; integral component of membrane; nucleus; cytoplasm; cytosol; aggresome
KCNG1	7.27179e-08	-0.146525	0.199	0.319	0.00266155	transmembrane transport; ion transport; potassium ion transport; regulation of ion transmembrane transport; protein homooligomerization; potassium ion transmembrane transport; regulation of delayed rectifier potassium channel activity	ion channel activity; voltage-gated ion channel activity; voltage-gated potassium channel activity; potassium channel activity; delayed rectifier potassium channel activity; protein binding	membrane; integral component of membrane; voltage-gated potassium channel complex; plasma membrane
GCA	7.53901e-08	-0.227632	0.612	0.723	0.00275935	neutrophil degranulation; membrane fusion	calcium ion binding; metal ion binding; protein homodimerization activity; protein binding; protein heterodimerization activity	cytosol; plasma membrane; cytoplasm; membrane; extracellular region; extracellular exosome; azurophil granule lumen
NKAIN3	7.60654e-08	0.227804	0.67	0.603	0.00278407	regulation of sodium ion transport		membrane; integral component of membrane; plasma membrane
GOLGA8A	7.73585e-08	-0.150276	0.24	0.364	0.0028314	Golgi organization		membrane; Golgi apparatus; cytosol; Golgi cis cisterna; cis-Golgi network; Golgi cisterna membrane
CCNG1	7.89924e-08	0.227576	0.742	0.682	0.0028912	protein phosphorylation; cell division; cell cycle; regulation of cell cycle; regulation of cyclin-dependent protein serine/threonine kinase activity; mitotic cell cycle phase transition	protein binding; protein kinase binding; protein kinase activity; cyclin-dependent protein serine/threonine kinase regulator activity	nucleus; cytoplasm; nucleoplasm; cyclin-dependent protein kinase holoenzyme complex
RPL31	8.46293e-08	-0.173157	0.992	0.998	0.00309752	translation; cytoplasmic translation; viral transcription; translational initiation; nuclear-transcribed mRNA catabolic process, nonsense-mediated decay; SRP-dependent cotranslational protein targeting to membrane	RNA binding; structural constituent of ribosome; protein binding	membrane; ribosome; focal adhesion; cytosolic large ribosomal subunit; cytosol; extracellular exosome; polysomal ribosome; intracellular
WNT7B	8.69747e-08	0.103194	0.126	0.054	0.00318336	multicellular organism development; Wnt signaling pathway; neuron differentiation; synapse organization; homeostatic process; cell fate commitment; cellular response to retinoic acid; positive regulation of JNK cascade; canonical Wnt signaling pathway; lens fiber cell development; in utero embryonic development; lung morphogenesis; positive regulation of osteoblast differentiation; embryonic plac…	signaling receptor binding; protein binding; frizzled binding; receptor ligand activity	extracellular region; extracellular space; plasma membrane; endoplasmic reticulum lumen; endocytic vesicle membrane; Golgi lumen; extracellular exosome; cytoplasm
ZNF804A	8.70279e-08	0.120334	0.217	0.12	0.00318531	positive regulation of gene expression; positive regulation of neuron projection development; regulation of neuron projection development; positive regulation of dendritic spine maintenance	nucleic acid binding; metal ion binding	nucleus; cytoplasm; plasma membrane; growth cone; dendritic spine; neuronal cell body; postsynapse; dendritic shaft; axon; presynapse; dendritic microtubule
CDCA7L	8.84502e-08	0.284175	0.783	0.712	0.00323737	regulation of transcription, DNA-templated; positive regulation of cell population proliferation; cell division	protein binding	nucleus; cytoplasm; nucleolus; cytosol; fibrillar center; membrane; integral component of membrane
RPS13	8.96204e-08	-0.128617	1	0.999	0.0032802	translation; viral transcription; translational initiation; nuclear-transcribed mRNA catabolic process, nonsense-mediated decay; SRP-dependent cotranslational protein targeting to membrane; negative regulation of RNA splicing	structural constituent of ribosome; RNA binding; protein binding; mRNA binding; mRNA 5'-UTR binding; small ribosomal subunit rRNA binding	ribosome; nucleus; membrane; cytosolic small ribosomal subunit; nucleolus; focal adhesion; nucleoplasm; cytosol; extracellular exosome; postsynaptic density; intracellular
KITLG	9.36824e-08	0.120451	0.197	0.107	0.00342887	positive regulation of cell population proliferation; cell adhesion; ovarian follicle development; neural crest cell migration; positive regulation of leukocyte migration; positive regulation of myeloid leukocyte differentiation; negative regulation of mast cell apoptotic process; ectopic germ cell programmed cell death; negative regulation of apoptotic process; positive regulation of MAP kinase …	growth factor activity; protein binding; cytokine activity; stem cell factor receptor binding	cytoplasm; membrane; integral component of membrane; plasma membrane; cytoskeleton; cell projection; extracellular region; extracellular space; lamellipodium; filopodium
ADD3	9.75332e-08	0.178564	0.546	0.427	0.00356981	transmembrane transport; actin filament bundle assembly; barbed-end actin filament capping; cytoskeleton organization	actin binding; calmodulin binding; actin filament binding; structural constituent of cytoskeleton; spectrin binding	cytoplasm; membrane; nucleoplasm; plasma membrane; cytoskeleton; cytosol; postsynaptic density; plasma membrane raft; condensed nuclear chromosome; brush border; cell-cell junction; cell cortex
CTSV	1.01351e-07	-0.127662	0.17	0.285	0.00370956	proteolysis; cell communication; spermatogenesis; male gonad development; cellular response to starvation; response to glucose; multicellular organism aging; response to organic cyclic compound; nerve development; response to gonadotropin; decidualization; autophagic cell death; response to glucocorticoid; Sertoli cell differentiation; response to odorant; antigen processing and presentation of e…	hydrolase activity; aminopeptidase activity; cysteine-type endopeptidase activity; peptidase activity; cysteine-type peptidase activity; kininogen binding; peptide binding; protein-containing complex binding; protein binding	cytoplasm; lysosome; vacuole; microvillus; external side of plasma membrane; secretory granule; neuron projection; perikaryon; apical part of cell; extracellular space; extracellular region; lysosomal lumen
TUT4	1.11917e-07	-0.167485	0.788	0.869	0.00409629	oocyte maturation; cytokine production; miRNA metabolic process; RNA 3'-end processing; regulation of lipopolysaccharide-mediated signaling pathway; negative regulation of NF-kappaB transcription factor activity; positive regulation of interleukin-6 production; interleukin-6-mediated signaling pathway; RNA 3' uridylation; polyuridylation-dependent mRNA catabolic process; gene silencing by RNA; nu…	nucleic acid binding; zinc ion binding; nucleotidyltransferase activity; miRNA binding; RNA uridylyltransferase activity; uridylyltransferase activity; RNA binding; metal ion binding; transferase activity; protein binding	nucleolus; cytosol; nucleus; cytoplasm; extracellular space; extracellular exosome; cytoplasmic ribonucleoprotein granule
ENHO	1.16802e-07	-0.171842	0.457	0.584	0.00427505	signal transduction; positive regulation of Notch signaling pathway; negative regulation of insulin receptor signaling pathway; negative regulation of insulin secretion; negative regulation of lipid biosynthetic process; negative regulation of RNA polymerase II regulatory region sequence-specific DNA binding	hormone activity	extracellular region; plasma membrane
JPH1	1.23978e-07	-0.132378	0.165	0.276	0.00453773	release of sequestered calcium ion into cytosol; regulation of ryanodine-sensitive calcium-release channel activity; calcium ion transport into cytosol; muscle organ development	calcium-release channel activity; structural constituent of muscle	membrane; integral component of membrane; nucleus; nucleoplasm; endoplasmic reticulum; endoplasmic reticulum membrane; plasma membrane; junctional membrane complex; sarcoplasmic reticulum; sarcoplasmic reticulum membrane; junctional sarcoplasmic reticulum membrane; Z disc
HMGCS1	1.24425e-07	-0.363625	0.788	0.853	0.0045541	lipid metabolic process; liver development; steroid biosynthetic process; brain development; steroid metabolic process; isoprenoid biosynthetic process; male gonad development; response to low light intensity stimulus; response to hormone; response to organic substance; response to organic cyclic compound; response to purine-containing compound; sterol biosynthetic process; response to vitamin E;…	transferase activity; catalytic activity; protein homodimerization activity; hydroxymethylglutaryl-CoA synthase activity; drug binding; isomerase activity; organic acid binding	cytoplasm; cytosol
SUCLG1	1.24432e-07	0.334499	0.692	0.668	0.00455432	tricarboxylic acid cycle; nucleoside diphosphate phosphorylation; succinyl-CoA metabolic process; succinate metabolic process; nucleoside triphosphate biosynthetic process	RNA binding; nucleotide binding; catalytic activity; ligase activity; cofactor binding; succinate-CoA ligase activity; succinate-CoA ligase (ADP-forming) activity; succinate-CoA ligase (GDP-forming) activity; nucleoside diphosphate kinase activity	cytosol; mitochondrion; plasma membrane; mitochondrial matrix
HIST1H3H	1.29053e-07	-0.123647	0.103	0.205	0.00472346	nucleosome assembly; cellular protein metabolic process; regulation of gene silencing by miRNA; interleukin-7-mediated signaling pathway; regulation of megakaryocyte differentiation; DNA replication-dependent nucleosome assembly; blood coagulation; chromatin silencing at rDNA; negative regulation of gene expression, epigenetic; protein heterotetramerization; chromatin organization; telomere organ…	DNA binding; protein heterodimerization activity; protein binding; cadherin binding	nucleus; membrane; nucleosome; chromosome; extracellular region; nucleoplasm; extracellular exosome; protein-containing complex; nuclear chromosome; nuclear nucleosome
USP1	1.33953e-07	-0.177173	0.876	0.926	0.00490283	protein deubiquitination; ubiquitin-dependent protein catabolic process; proteolysis; DNA repair; cellular response to DNA damage stimulus; interstrand cross-link repair; response to UV; skeletal system development; regulation of DNA repair; monoubiquitinated protein deubiquitination; DNA damage response, detection of DNA damage	thiol-dependent ubiquitinyl hydrolase activity; hydrolase activity; protein binding; peptidase activity; cysteine-type peptidase activity; cysteine-type endopeptidase activity; thiol-dependent ubiquitin-specific protease activity	nucleus; nucleoplasm
CCNI	1.4319e-07	0.162515	0.987	0.987	0.00524089	protein phosphorylation; regulation of cell cycle; spermatogenesis; regulation of cyclin-dependent protein serine/threonine kinase activity; mitotic cell cycle phase transition	protein kinase binding; protein kinase activity; cyclin-dependent protein serine/threonine kinase regulator activity	nucleus; cytoplasm; cyclin-dependent protein kinase holoenzyme complex
CCDC173	1.43357e-07	0.15379	0.331	0.221	0.00524701
RPL38	1.4443e-07	-0.148376	0.997	0.998	0.00528628	translation; cytoplasmic translation; viral transcription; translational initiation; nuclear-transcribed mRNA catabolic process, nonsense-mediated decay; SRP-dependent cotranslational protein targeting to membrane; skeletal system development; ossification; regulation of translation; sensory perception of sound; 90S preribosome assembly; middle ear morphogenesis; axial mesoderm development	structural constituent of ribosome; RNA binding	ribosome; focal adhesion; cytosolic large ribosomal subunit; cytosol; postsynaptic density; polysomal ribosome; intracellular; eukaryotic 80S initiation complex; synapse
MT-ATP6	1.50038e-07	0.16696	0.997	0.999	0.00549155	ion transport; ATP synthesis coupled proton transport; ATP biosynthetic process; cristae formation; mitochondrial ATP synthesis coupled proton transport; aging; response to hyperoxia	proton transmembrane transporter activity; protein binding; ATPase activity; proton-transporting ATP synthase activity, rotational mechanism; transmembrane transporter activity	membrane; integral component of membrane; mitochondrial inner membrane; mitochondrion; proton-transporting ATP synthase complex, coupling factor F(o); mitochondrial proton-transporting ATP synthase complex; proton-transporting ATP synthase complex
RRAS	1.51483e-07	-0.116527	0.147	0.258	0.00554444	signal transduction; negative regulation of cell migration; face morphogenesis; positive regulation of angiogenesis; Ras protein signal transduction; regulation of ERK1 and ERK2 cascade; leukocyte differentiation; regulation of protein kinase B signaling	nucleotide binding; GTPase activity; GTP binding; protein binding; GDP binding; protein-containing complex binding	membrane; plasma membrane; focal adhesion; extracellular exosome
PGAM1	1.51593e-07	-0.183732	0.834	0.884	0.00554846	glycolytic process; neutrophil degranulation; gluconeogenesis; canonical glycolysis; regulation of glycolytic process; respiratory burst; regulation of pentose-phosphate shunt	isomerase activity; hydrolase activity; catalytic activity; protein binding; bisphosphoglycerate mutase activity; phosphoglycerate mutase activity; intramolecular transferase activity, phosphotransferases; protein kinase binding	cytoplasm; membrane; cytosol; extracellular region; extracellular exosome; secretory granule lumen; ficolin-1-rich granule lumen
MAZ	1.53543e-07	-0.191257	0.817	0.866	0.00561981	positive regulation of protein kinase B signaling; positive regulation of gene expression; positive regulation of cell migration; negative regulation of apoptotic signaling pathway; transcription initiation from RNA polymerase II promoter; regulation of transcription by RNA polymerase II; positive regulation of phosphatidylinositol 3-kinase signaling; positive regulation of cell population prolif…	nucleic acid binding; RNA binding; metal ion binding; DNA binding; protein binding; DNA-binding transcription factor activity, RNA polymerase II-specific; RNA polymerase II proximal promoter sequence-specific DNA binding	nucleus
RGS10	1.56056e-07	-0.108115	0.103	0.204	0.00571182	regulation of G protein-coupled receptor signaling pathway; positive regulation of GTPase activity; G protein-coupled receptor signaling pathway; G protein-coupled acetylcholine receptor signaling pathway; negative regulation of signal transduction; response to amphetamine	GTPase activator activity; G-protein alpha-subunit binding; GTPase activity	nucleus; cytoplasm; cytosol; plasma membrane; neuronal cell body; dendritic spine; axon terminus
CXXC5	1.85828e-07	0.192533	0.67	0.59	0.00680147	negative regulation of transcription by RNA polymerase II; positive regulation of I-kappaB kinase/NF-kappaB signaling	zinc ion binding; metal ion binding; DNA binding; sequence-specific DNA binding; protein binding; transcription factor binding	nucleus; cytoplasm; cytosol; nucleoplasm
MT-ND1	1.88831e-07	0.174521	0.99	0.998	0.0069114	oxidation-reduction process; aerobic respiration; mitochondrial electron transport, NADH to ubiquinone; mitochondrial respiratory chain complex I assembly; response to organic cyclic compound; response to hydroperoxide; response to drug	protein binding; NADH dehydrogenase (ubiquinone) activity; NADH dehydrogenase activity	membrane; integral component of membrane; mitochondrial inner membrane; mitochondrion; respirasome; mitochondrial membrane; mitochondrial respiratory chain complex I; dendrite; neuronal cell body
HIST1H1B	1.88915e-07	-0.579968	0.457	0.532	0.00691448	chromatin organization; nucleosome assembly; regulation of transcription, DNA-templated; negative regulation of transcription by RNA polymerase II; protein stabilization; negative regulation of DNA recombination; positive regulation of cell growth; nucleosome positioning; establishment of protein localization to chromatin; chromosome condensation; negative regulation of chromatin silencing; posit…	RNA binding; DNA binding; chromatin DNA binding; protein binding; double-stranded DNA binding; histone deacetylase binding; nucleosomal DNA binding	nucleus; nucleosome; nuclear chromatin; chromosome; nuclear heterochromatin; nuclear euchromatin
MSRB2	1.94205e-07	0.215855	0.589	0.499	0.0071081	oxidation-reduction process; response to oxidative stress; protein repair; actin filament polymerization	metal ion binding; oxidoreductase activity; actin binding; peptide-methionine (R)-S-oxide reductase activity; oxidoreductase activity, acting on a sulfur group of donors, disulfide as acceptor; zinc ion binding; L-methionine-(R)-S-oxide reductase activity	mitochondrion; cytosol
SESN3	1.94384e-07	-0.17911	0.385	0.514	0.00711465	oxidation-reduction process; regulation of response to reactive oxygen species; negative regulation of TORC1 signaling; cellular response to glucose starvation; cellular response to amino acid stimulus; cellular response to amino acid starvation; positive regulation of macroautophagy; cellular response to leucine; cellular response to leucine starvation; response to insulin; TORC2 signaling; gluc…	oxidoreductase activity; protein binding; oxidoreductase activity, acting on peroxide as acceptor; leucine binding	nucleus; cytoplasm; GATOR2 complex; TORC2 complex
MCM2	1.94871e-07	-0.160916	0.328	0.456	0.00713247	DNA replication initiation; cell cycle; apoptotic process; DNA replication; negative regulation of DNA helicase activity; G1/S transition of mitotic cell cycle; double-strand break repair via break-induced replication; DNA unwinding involved in DNA replication; mitotic DNA replication initiation; pre-replicative complex assembly involved in nuclear cell cycle DNA replication; nucleosome assembly;…	metal ion binding; nucleotide binding; ATP binding; hydrolase activity; DNA binding; protein binding; DNA helicase activity; helicase activity; single-stranded DNA binding; DNA replication origin binding; 3'-5' DNA helicase activity; single-stranded DNA helicase activity; enzyme binding; histone binding	nucleus; cytoplasm; nucleoplasm; microtubule cytoskeleton; MCM complex; nuclear chromosome, telomeric region; chromatin; nuclear origin of replication recognition complex
RPL39	1.97247e-07	-0.135416	1	1	0.00721945	translation; cytoplasmic translation; viral transcription; innate immune response in mucosa; antibacterial humoral response; defense response to Gram-positive bacterium; antimicrobial humoral immune response mediated by antimicrobial peptide; translational initiation; nuclear-transcribed mRNA catabolic process, nonsense-mediated decay; SRP-dependent cotranslational protein targeting to membrane	RNA binding; structural constituent of ribosome	ribosome; extracellular space; cytosolic large ribosomal subunit; cytosol; polysomal ribosome; intracellular
NEUROD6	2.00804e-07	-0.204098	0.06	0.144	0.00734963	nervous system development; regulation of transcription, DNA-templated; multicellular organism development; cell differentiation; dentate gyrus development; positive regulation of transcription by RNA polymerase II	protein dimerization activity; DNA binding; RNA polymerase II proximal promoter sequence-specific DNA binding; DNA-binding transcription activator activity, RNA polymerase II-specific; DNA-binding transcription factor activity, RNA polymerase II-specific	nucleus; nuclear chromatin
PLTP	2.02646e-07	0.175981	0.349	0.246	0.00741703	lipid metabolic process; lipid transport; ceramide transport; phospholipid transport; high-density lipoprotein particle remodeling; positive regulation of cholesterol efflux; vitamin E biosynthetic process; flagellated sperm motility	lipid binding; phosphatidylethanolamine binding; phosphatidylcholine binding; phosphatidylcholine transporter activity; phosphatidic acid binding; lipid transporter activity; phospholipid transporter activity; phosphatidylglycerol binding; diacylglycerol binding; ceramide binding; ceramide transfer activity; phosphatidylethanolamine transfer activity; phosphatidic acid transfer activity	extracellular space; extracellular region; high-density lipoprotein particle
TANC2	2.24583e-07	0.138192	0.362	0.25	0.00821995	in utero embryonic development	protein binding	glutamatergic synapse; postsynaptic density, intracellular component
CEP112	2.29564e-07	0.167876	0.4	0.292	0.00840229	receptor localization to synapse		cytoplasm; cytoskeleton; centrosome; microtubule organizing center; plasma membrane; inhibitory synapse
STIM2	2.31654e-07	0.186043	0.39	0.291	0.00847878	cellular calcium ion homeostasis; activation of store-operated calcium channel activity; ion transport; calcium ion transport; calcium ion transmembrane transport; positive regulation of calcium ion transport; store-operated calcium entry	calcium channel regulator activity; protein binding; metal ion binding; calcium ion binding; store-operated calcium channel activity	cell; membrane; integral component of membrane; plasma membrane; endoplasmic reticulum; endoplasmic reticulum membrane
TACC2	2.33434e-07	0.143276	0.279	0.179	0.00854391	microtubule cytoskeleton organization; mitotic spindle organization; cell population proliferation; cerebral cortex development	nuclear hormone receptor binding	nucleus; cytoplasm; cytosol; nucleoplasm; plasma membrane; cytoskeleton; microtubule organizing center
RPS21	2.3456e-07	-0.127779	0.998	0.998	0.00858513	translation; cytoplasmic translation; viral transcription; translational initiation; nuclear-transcribed mRNA catabolic process, nonsense-mediated decay; SRP-dependent cotranslational protein targeting to membrane; endonucleolytic cleavage in ITS1 to separate SSU-rRNA from 5.8S rRNA and LSU-rRNA from tricistronic rRNA transcript (SSU-rRNA, 5.8S rRNA, LSU-rRNA); endonucleolytic cleavage to generat…	RNA binding; structural constituent of ribosome; protein N-terminus binding; protein binding	cytoplasm; endoplasmic reticulum; ribosome; cytosol; cytosolic small ribosomal subunit; nucleoplasm; rough endoplasmic reticulum; small ribosomal subunit; polysomal ribosome; synapse; intracellular
NPC2	2.35655e-07	-0.18252	0.543	0.657	0.00862522	intracellular cholesterol transport; lipid metabolic process; steroid metabolic process; lipid transport; cholesterol metabolic process; response to virus; neutrophil degranulation; cholesterol transport; cholesterol efflux; low-density lipoprotein particle clearance; cholesterol homeostasis; phospholipid transport; sterol transport; regulation of isoprenoid metabolic process; intracellular stero…	protein binding; enzyme binding; cholesterol binding; cholesterol transfer activity; sterol binding	cell; endoplasmic reticulum; extracellular space; extracellular region; lysosome; extracellular exosome; lysosomal lumen; azurophil granule lumen
NCKAP5	2.40278e-07	-0.146726	0.243	0.365	0.00879441	microtubule depolymerization; microtubule bundle formation		microtubule plus-end
FOXG1	2.45475e-07	-0.196095	0.794	0.851	0.00898462	regulation of transcription, DNA-templated; multicellular organism development; regulation of transcription by RNA polymerase II; negative regulation of transcription, DNA-templated; brain development; aging	DNA binding; DNA-binding transcription factor activity; sequence-specific DNA binding; protein binding; DNA-binding transcription factor activity, RNA polymerase II-specific	nucleus; nuclear chromatin; nucleoplasm
SRSF10	2.56873e-07	-0.158884	0.945	0.968	0.0094018	mRNA processing; RNA splicing; mRNA splicing, via spliceosome; regulation of RNA splicing; regulation of alternative mRNA splicing, via spliceosome; regulation of transcription, DNA-templated; negative regulation of mRNA splicing, via spliceosome; RNA splicing, via transesterification reactions; mRNA cis splicing, via spliceosome; spliceosomal tri-snRNP complex assembly; mRNA splice site selectio…	nucleic acid binding; RNA binding; protein binding; unfolded protein binding; RS domain binding	nucleus; cytoplasm; nuclear speck; cytosol; nucleoplasm
MKLN1	2.58575e-07	0.192425	0.561	0.473	0.00946411	regulation of cell shape; signal transduction; cell-matrix adhesion; actin cytoskeleton reorganization; regulation of receptor internalization	protein binding; protein homodimerization activity; identical protein binding	nucleus; cytoplasm; cytosol; cell projection; cell junction; synapse; nucleoplasm; cell cortex; ruffle; ubiquitin ligase complex
MIR124-2HG	2.6899e-07	0.14386	0.222	0.132	0.00984529
KAZN	2.7701e-07	-0.128273	0.235	0.355	0.0101388	keratinization; cornification	protein binding	nuclear speck; cytosol; nucleoplasm; nucleus; cytoplasm; cytoskeleton; cell junction; desmosome; cornified envelope
CSTB	2.89225e-07	-0.176999	0.868	0.914	0.0105859	negative regulation of endopeptidase activity; negative regulation of peptidase activity; neutrophil degranulation; negative regulation of proteolysis; adult locomotory behavior	endopeptidase inhibitor activity; RNA binding; cysteine-type endopeptidase inhibitor activity; peptidase inhibitor activity; protease binding	intracellular; nucleus; cytoplasm; nucleolus; cytosol; extracellular space; extracellular region; extracellular exosome; collagen-containing extracellular matrix; secretory granule lumen; ficolin-1-rich granule lumen; tertiary granule lumen
EPHA7	2.91246e-07	-0.102523	0.199	0.322	0.0106599	protein phosphorylation; phosphorylation; transmembrane receptor protein tyrosine kinase signaling pathway; peptidyl-tyrosine phosphorylation; apoptotic process; multicellular organism development; nervous system development; axon guidance; ephrin receptor signaling pathway; brain development; positive regulation of neuron apoptotic process; negative chemotaxis; regulation of ERK1 and ERK2 cascad…	nucleotide binding; protein kinase activity; ATP binding; kinase activity; transferase activity; protein tyrosine kinase activity; transmembrane receptor protein tyrosine kinase activity; ephrin receptor activity; protein binding; chemorepellent activity; transmembrane-ephrin receptor activity; GPI-linked ephrin receptor activity; axon guidance receptor activity; ephrin receptor binding	membrane; integral component of membrane; integral component of plasma membrane; plasma membrane; receptor complex; neuron projection; dendrite; neuromuscular junction; neuronal cell body; postsynaptic membrane; Schaffer collateral - CA1 synapse; hippocampal mossy fiber to CA3 synapse; glutamatergic synapse; integral component of postsynaptic specialization membrane; integral component of postsyn…
OSTC	3.02381e-07	0.183451	0.845	0.814	0.0110674	protein glycosylation; protein N-linked glycosylation via asparagine	protein binding; dolichyl-diphosphooligosaccharide-protein glycotransferase activity	membrane; integral component of membrane; endoplasmic reticulum; oligosaccharyltransferase complex
CTXN1	3.04817e-07	0.149514	0.481	0.368	0.0111566			membrane; integral component of membrane; intrinsic component of membrane
FAM241B	3.14708e-07	-0.129478	0.237	0.356	0.0115186		protein binding	membrane; integral component of membrane; intracellular membrane-bounded organelle
PHACTR2	3.23737e-07	0.135432	0.292	0.192	0.0118491	negative regulation of phosphoprotein phosphatase activity; platelet degranulation	actin binding; protein phosphatase inhibitor activity; protein binding	membrane; plasma membrane; platelet alpha granule membrane
RALGPS2	3.29417e-07	0.169338	0.537	0.434	0.012057	small GTPase mediated signal transduction; regulation of Ral protein signal transduction	guanyl-nucleotide exchange factor activity	cytoplasm; membrane; plasma membrane; intracellular
ATP1A1	3.31229e-07	0.172776	0.445	0.343	0.0121233	dephosphorylation; ion transport; potassium ion transport; sodium ion transport; establishment or maintenance of transmembrane electrochemical gradient; potassium ion import across plasma membrane; ion transmembrane transport; regulation of cardiac conduction; regulation of sodium ion transport; cardiac muscle cell action potential involved in contraction; cellular sodium ion homeostasis; cellula…	metal ion binding; nucleotide binding; ATP binding; protein binding; potassium transmembrane transporter activity, phosphorylative mechanism; chaperone binding; sodium:potassium-exchanging ATPase activity; potassium ion binding; sodium ion binding; steroid hormone binding; phosphatase activity; protein kinase binding; protein domain specific binding; ankyrin binding; ADP binding; phosphatidylinos…	membrane; integral component of membrane; plasma membrane; melanosome; extracellular exosome; sarcolemma; protein-containing complex; endoplasmic reticulum; sodium:potassium-exchanging ATPase complex; extracellular vesicle; Golgi apparatus; endosome; caveola; postsynaptic density; intercalated disc; basolateral plasma membrane; apical plasma membrane; T-tubule; membrane raft
LRRC3B	3.3448e-07	-0.13295	0.29	0.424	0.0122423		protein binding	membrane; integral component of membrane; extracellular space; extracellular matrix
AAMDC	3.3617e-07	-0.216789	0.525	0.626	0.0123042	positive regulation of fat cell differentiation	protein binding	cytoplasm
PITPNC1	3.44153e-07	0.120341	0.201	0.115	0.0125963	phospholipid transport; signal transduction; lipid transport	phospholipid transporter activity; protein binding; lipid binding; phosphatidylinositol binding; phosphatidylinositol transfer activity; phosphatidic acid binding; phosphatidylglycerol binding	cytosol; nucleoplasm; intracellular; cytoplasm
LMO4	3.82641e-07	0.191079	0.781	0.715	0.014005	transcription by RNA polymerase II; regulation of cell migration; neural tube closure; positive regulation of kinase activity; ventricular septum development; ventral spinal cord interneuron differentiation; spinal cord motor neuron differentiation; spinal cord association neuron differentiation; negative regulation of protein complex assembly; regulation of cell fate specification; positive regu…	metal ion binding; DNA-binding transcription factor activity; protein binding; transcription factor binding; enhancer sequence-specific DNA binding	cell leading edge; transcription factor complex
IFI44	3.86515e-07	-0.114701	0.17	0.283	0.0141468	immune response; response to virus; response to bacterium		cytoplasm
SVIL	3.89685e-07	-0.11031	0.416	0.541	0.0142629	cytoskeleton organization; positive regulation of cytokinesis; skeletal muscle tissue development	actin binding; actin filament binding; protein binding	nucleus; cytoplasm; membrane; cytosol; plasma membrane; actin cytoskeleton; cytoskeleton; cell projection; cell junction; focal adhesion; midbody; podosome; cleavage furrow; invadopodium; costamere; microtubule minus-end
SEC11C	4.41928e-07	0.191167	0.6	0.517	0.016175	proteolysis; signal peptide processing	hydrolase activity; peptidase activity; serine-type peptidase activity	membrane; integral component of membrane; endoplasmic reticulum; endoplasmic reticulum membrane; organelle membrane; intracellular membrane-bounded organelle; signal peptidase complex
GNAQ	4.48443e-07	0.192898	0.618	0.54	0.0164135	protein stabilization; negative regulation of protein kinase activity; G protein-coupled receptor signaling pathway; signal transduction; positive regulation of GTPase activity; G protein-coupled acetylcholine receptor signaling pathway; phototransduction, visible light; entrainment of circadian clock; adenylate cyclase-modulating G protein-coupled receptor signaling pathway; blood coagulation; p…	metal ion binding; nucleotide binding; GTPase activity; GTP binding; G protein-coupled receptor binding; protein binding; guanyl nucleotide binding; G-protein beta/gamma-subunit complex binding; GTPase activator activity; type 2A serotonin receptor binding	nucleus; membrane; lysosomal membrane; heterotrimeric G-protein complex; photoreceptor outer segment; plasma membrane; extracellular exosome; nuclear membrane; cytoplasm
CDK2AP1	4.65161e-07	0.183409	0.871	0.821	0.0170254	cell cycle; positive regulation of protein phosphorylation; DNA-dependent DNA replication	protein binding; DNA polymerase binding	nucleus; cytosol; nucleoplasm; perinuclear region of cytoplasm
NEDD1	4.72729e-07	-0.156346	0.416	0.539	0.0173024	cell division; cell cycle; G2/M transition of mitotic cell cycle; regulation of G2/M transition of mitotic cell cycle; ciliary basal body-plasma membrane docking; protein localization to centrosome	protein binding	cytoplasm; cytoskeleton; centrosome; microtubule organizing center; ciliary basal body; cytosol; spindle pole; centriole; pericentriolar material; apical part of cell
KCNAB3	4.75259e-07	-0.113565	0.135	0.237	0.017395	ion transmembrane transport; ion transport; potassium ion transport; regulation of ion transmembrane transport; potassium ion transmembrane transport	voltage-gated ion channel activity; voltage-gated potassium channel activity; potassium channel regulator activity	cytoplasm; integral component of membrane; plasma membrane
HIST1H2AE	4.81565e-07	-0.169053	0.29	0.404	0.0176257	chromatin organization; negative regulation of cell population proliferation	DNA binding; protein heterodimerization activity; protein binding	nucleus; nucleosome; chromosome; nuclear chromatin; extracellular exosome
LMAN1	4.93894e-07	0.185734	0.545	0.458	0.018077	protein transport; endoplasmic reticulum to Golgi vesicle-mediated transport; vesicle-mediated transport; Golgi organization; blood coagulation; COPII vesicle coating; endoplasmic reticulum organization; positive regulation of organelle organization; protein folding; protein N-linked glycosylation via asparagine; negative regulation of protein targeting to mitochondrion	metal ion binding; carbohydrate binding; protein binding; mannose binding; unfolded protein binding	membrane; integral component of membrane; cytosol; endoplasmic reticulum; endoplasmic reticulum membrane; Golgi apparatus; cytoplasm; Golgi membrane; endoplasmic reticulum-Golgi intermediate compartment; COPII-coated ER to Golgi transport vesicle; extracellular exosome; collagen-containing extracellular matrix; ER to Golgi transport vesicle membrane; endoplasmic reticulum-Golgi intermediate compa…
RAB31	5.25217e-07	0.172125	0.346	0.241	0.0192235	intracellular protein transport; Rab protein signal transduction; neutrophil degranulation; Golgi to plasma membrane protein transport; cellular response to insulin stimulus; regulated exocytosis; receptor internalization; phagosome maturation; positive regulation of phagocytosis, engulfment	nucleotide binding; GTPase activity; GTP binding; protein binding; GDP binding	membrane; Golgi apparatus; cytoplasmic vesicle; plasma membrane; endosome; early endosome; cytosol; phagocytic cup; phagocytic vesicle membrane; secretory granule membrane; trans-Golgi network membrane; phagocytic vesicle; early endosome membrane; early phagosome membrane
HIST1H3F	5.32643e-07	-0.164608	0.175	0.283	0.0194953	nucleosome assembly; cellular protein metabolic process; regulation of gene silencing by miRNA; interleukin-7-mediated signaling pathway; regulation of megakaryocyte differentiation; DNA replication-dependent nucleosome assembly; blood coagulation; chromatin silencing at rDNA; negative regulation of gene expression, epigenetic; protein heterotetramerization; chromatin organization; telomere organ…	DNA binding; protein heterodimerization activity; protein binding; cadherin binding	nucleus; membrane; nucleosome; chromosome; extracellular region; nucleoplasm; extracellular exosome; protein-containing complex; nuclear chromosome; nuclear nucleosome
KLF13	5.37253e-07	-0.135668	0.367	0.493	0.019664	regulation of transcription by RNA polymerase II; transcription by RNA polymerase II; negative regulation of cell population proliferation; negative regulation of erythrocyte differentiation; positive regulation of transcription by RNA polymerase II	nucleic acid binding; metal ion binding; DNA binding; protein binding; DNA-binding transcription factor activity, RNA polymerase II-specific; RNA polymerase II proximal promoter sequence-specific DNA binding; DNA-binding transcription activator activity, RNA polymerase II-specific	nucleus; nuclear chromatin
GRB10	5.55096e-07	0.167364	0.393	0.295	0.0203171	negative regulation of glucose import; negative regulation of insulin receptor signaling pathway; signal transduction; negative regulation of Wnt signaling pathway; insulin receptor signaling pathway; axon guidance; positive regulation of cold-induced thermogenesis; positive regulation of vascular endothelial growth factor receptor signaling pathway; positive regulation of signal transduction; ne…	protein binding; insulin receptor binding; SH3/SH2 adaptor activity	cytoplasm; cytosol; protein-containing complex; plasma membrane
CCS	5.55178e-07	-0.127833	0.215	0.332	0.0203201	oxidation-reduction process; metal ion transport; superoxide metabolic process; protein maturation by copper ion transfer; removal of superoxide radicals; cellular response to oxidative stress; positive regulation of oxidoreductase activity	metal ion binding; protein binding; copper ion binding; cadherin binding; protein disulfide oxidoreductase activity; superoxide dismutase copper chaperone activity; superoxide dismutase activity	nucleus; cytoplasm; cytosol
CKLF	5.75117e-07	-0.108871	0.228	0.353	0.0210499	signal transduction; chemotaxis; neutrophil chemotaxis; cell population proliferation; macrophage chemotaxis; lymphocyte chemotaxis; secretion by cell; leukocyte chemotaxis	cytokine activity; chemokine activity	membrane; integral component of membrane; extracellular space; extracellular region
UNG	5.83344e-07	-0.190263	0.295	0.403	0.021351	DNA repair; cellular response to DNA damage stimulus; base-excision repair; viral process; somatic hypermutation of immunoglobulin genes; somatic recombination of immunoglobulin gene segments; negative regulation of apoptotic process; isotype switching; depyrimidination; base-excision repair, AP site formation via deaminated base removal	hydrolase activity; protein binding; hydrolase activity, hydrolyzing N-glycosyl compounds; uracil DNA N-glycosylase activity; ribosomal small subunit binding; damaged DNA binding	nucleus; mitochondrion; nucleoplasm
CADM2	5.83663e-07	0.104527	0.201	0.114	0.0213626	cell adhesion; adherens junction organization		membrane; integral component of membrane; plasma membrane; cell projection; cell junction; synapse; axon
LMO1	5.96621e-07	0.184666	0.162	0.086	0.0218369	positive regulation of transcription by RNA polymerase II; regulation of hematopoietic stem cell differentiation; negative regulation of transcription by RNA polymerase II; regulation of T cell homeostatic proliferation	metal ion binding; protein binding	nucleus; nucleoplasm
ATXN7L3B	6.12883e-07	-0.139078	0.703	0.8	0.0224321	regulation of gene expression	protein binding	cytoplasm
CAMK2N2	6.15645e-07	0.10572	0.142	0.07	0.0225332	negative regulation of protein kinase activity	protein kinase inhibitor activity; calcium-dependent protein kinase inhibitor activity; protein kinase binding	nucleus; cytoplasm; centrosome; cytosol
CCDC30	6.23317e-07	0.12228	0.166	0.089	0.022814
MLLT3	6.31134e-07	-0.147456	0.228	0.337	0.0231002	regulation of transcription, DNA-templated; positive regulation of transcription, DNA-templated; regulation of transcription by RNA polymerase II; segment specification; anterior/posterior pattern specification; transcription by RNA polymerase II; transcription elongation from RNA polymerase II promoter; negative regulation of canonical Wnt signaling pathway; positive regulation of Wnt signaling …	protein binding; DNA-binding transcription factor activity, RNA polymerase II-specific; chromatin binding; histone binding; lysine-acetylated histone binding; modification-dependent protein binding	nucleus; chromosome; nucleoplasm; extracellular exosome; transcription elongation factor complex
CSPG5	6.52194e-07	-0.121656	0.194	0.303	0.023871	nervous system development; signal transduction; multicellular organism development; cell differentiation; regulation of growth; cytoskeleton organization; chondroitin sulfate biosynthetic process; chondroitin sulfate catabolic process; dermatan sulfate biosynthetic process; intracellular transport; glial cell projection elongation; modulation of chemical synaptic transmission; trans-synaptic sig…	growth factor activity; protein binding	membrane; integral component of membrane; endoplasmic reticulum; endoplasmic reticulum membrane; Golgi apparatus; plasma membrane; Golgi membrane; cell surface; extracellular region; Golgi-associated vesicle membrane; integral component of plasma membrane; lysosomal lumen; Golgi lumen; glutamatergic synapse; GABA-ergic synapse; integral component of postsynaptic membrane
FBXO16	6.91214e-07	0.113378	0.21	0.126	0.0252991		protein binding
FAU	6.98959e-07	-0.104856	1	0.998	0.0255826	translation; viral transcription; innate immune response in mucosa; antibacterial humoral response; defense response to Gram-positive bacterium; antimicrobial humoral immune response mediated by antimicrobial peptide; translational initiation; nuclear-transcribed mRNA catabolic process, nonsense-mediated decay; SRP-dependent cotranslational protein targeting to membrane	RNA binding; structural constituent of ribosome; protein binding	ribosome; extracellular space; cytosolic small ribosomal subunit; nucleoplasm; cytosol; small ribosomal subunit; intracellular
PAG1	7.04639e-07	-0.144129	0.222	0.335	0.0257905	intracellular signal transduction; positive regulation of signal transduction; immune system process; adaptive immune response; T cell receptor signaling pathway; signal transduction; negative regulation of T cell activation; regulation of T cell activation	protein binding; SH3/SH2 adaptor activity; SH2 domain binding	membrane; integral component of membrane; plasma membrane; membrane raft
TOX3	7.2974e-07	0.243059	0.623	0.553	0.0267092	apoptotic process; positive regulation of transcription, DNA-templated; regulation of transcription by RNA polymerase II; regulation of apoptotic process; negative regulation of neuron apoptotic process	DNA binding; protein homodimerization activity; protein binding; DNA-binding transcription factor activity, RNA polymerase II-specific; chromatin binding; estrogen response element binding; phosphoprotein binding	nucleus
C9orf116	7.36966e-07	0.127633	0.24	0.15	0.0269737	cellular response to DNA damage stimulus; determination of left/right symmetry; regulation of gene expression; cellular response to UV-C	protein binding	nucleus
MEGF10	7.66104e-07	-0.131244	0.186	0.294	0.0280402	cell adhesion; muscle organ development; homotypic cell-cell adhesion; phagocytosis; engulfment of apoptotic cell; myoblast migration; apoptotic process involved in development; regulation of muscle cell differentiation; skeletal muscle satellite cell activation; apoptotic cell clearance; skeletal muscle satellite cell differentiation; skeletal muscle satellite cell proliferation; muscle cell pro…	Notch binding; complement component C1q binding; scavenger receptor activity; protein binding	membrane; integral component of membrane; plasma membrane; cell projection; phagocytic cup
UBA52	7.84075e-07	0.110336	1	0.999	0.0286979	translation; protein ubiquitination; cellular protein metabolic process; endosomal transport; viral life cycle; intracellular transport of virus; protein polyubiquitination; protein deubiquitination; anaphase-promoting complex-dependent catabolic process; regulation of mRNA stability; transmembrane transport; regulation of transcription from RNA polymerase II promoter in response to hypoxia; inte…	structural constituent of ribosome; protein binding; ubiquitin protein ligase binding; protein tag	nucleus; cytoplasm; endoplasmic reticulum; cytosol; nucleoplasm; lysosomal membrane; ribosome; plasma membrane; extracellular space; cytosolic small ribosomal subunit; endoplasmic reticulum membrane; extracellular exosome; endosome membrane; host cell; vesicle; endocytic vesicle membrane; mitochondrial outer membrane; cytosolic large ribosomal subunit
CELF1	8.0176e-07	0.188868	0.703	0.64	0.0293452	mRNA processing; RNA splicing; regulation of alternative mRNA splicing, via spliceosome; regulation of RNA splicing; embryo development ending in birth or egg hatching; mRNA splice site selection; germ cell development; negative regulation of translation; RNA interference; spermatid development; positive regulation of multicellular organism growth	nucleic acid binding; RNA binding; protein binding; mRNA binding; pre-mRNA binding; translation repressor activity, mRNA regulatory element binding; BRE binding; translation initiation factor binding	nucleus; cytoplasm; membrane; nucleoplasm; ribonucleoprotein complex
DNALI1	9.08216e-07	0.136352	0.388	0.286	0.0332416		motor activity; protein binding; dynein heavy chain binding	cytoplasm; cell projection; dynein complex; cilium; axoneme; filopodium; 9+2 motile cilium
CREM	9.36945e-07	0.175608	0.502	0.407	0.0342931	regulation of transcription, DNA-templated; rhythmic process; multicellular organism development; cell differentiation; spermatogenesis; negative regulation of transcription by RNA polymerase II; signal transduction; glucose metabolic process; fatty acid metabolic process; glycosphingolipid metabolic process; regulation of circadian rhythm; positive regulation of transcription by RNA polymerase I…	DNA binding; DNA-binding transcription factor activity; protein binding; DNA-binding transcription factor activity, RNA polymerase II-specific; DNA-binding transcription repressor activity, RNA polymerase II-specific; RNA polymerase II regulatory region sequence-specific DNA binding; cAMP response element binding protein binding	nucleus; cytoplasm; nuclear chromatin; transcription factor complex
CSAD	9.40061e-07	-0.115685	0.21	0.324	0.0344072	carboxylic acid metabolic process; taurine biosynthetic process; L-cysteine catabolic process to hypotaurine; L-cysteine catabolic process to taurine	catalytic activity; lyase activity; carboxy-lyase activity; pyridoxal phosphate binding; aspartate 1-decarboxylase activity; sulfinoalanine decarboxylase activity	cytoplasm
TRIB2	1.0018e-06	0.131107	0.297	0.199	0.0366668	negative regulation of fat cell differentiation; negative regulation of protein kinase activity; protein phosphorylation; positive regulation of proteasomal ubiquitin-dependent protein catabolic process; regulation of MAP kinase activity; negative regulation of interleukin-10 biosynthetic process	protein kinase inhibitor activity; ubiquitin protein ligase binding; transcription factor binding; mitogen-activated protein kinase kinase binding; ubiquitin-protein transferase regulator activity; ATP binding; protein kinase activity	cytoplasm; cytoskeleton; nucleus
TPM4	1.10668e-06	0.213431	0.843	0.822	0.0405055	actin filament organization; muscle contraction; muscle filament sliding; osteoblast differentiation	metal ion binding; actin binding; protein homodimerization activity; protein binding; calcium ion binding; actin filament binding; identical protein binding; protein heterodimerization activity; structural constituent of muscle	cytoplasm; membrane; cytoskeleton; focal adhesion; cytosol; extracellular exosome; actin filament; stress fiber; muscle thin filament tropomyosin
CMTM8	1.12737e-06	0.16792	0.299	0.207	0.041263	signal transduction; chemotaxis; myelination	cytokine activity; structural constituent of myelin sheath	nucleus; cytoplasm; membrane; integral component of membrane; nucleoplasm; extracellular space
ZFHX4-AS1	1.15521e-06	-0.109097	0.091	0.177	0.0422818
IMPDH2	1.21712e-06	-0.18911	0.759	0.813	0.0445478	oxidation-reduction process; purine nucleotide biosynthetic process; circadian rhythm; GMP biosynthetic process; lymphocyte proliferation; protein homotetramerization; retina development in camera-type eye; cellular response to interleukin-4; neutrophil degranulation; purine ribonucleoside monophosphate biosynthetic process; GTP biosynthetic process	oxidoreductase activity; catalytic activity; IMP dehydrogenase activity; RNA binding; metal ion binding; nucleotide binding; DNA binding; protein binding	cytosol; nucleus; cytoplasm; membrane; extracellular region; peroxisomal membrane; extracellular exosome; secretory granule lumen; ficolin-1-rich granule lumen
CETN2	1.2746e-06	0.197077	0.685	0.641	0.0466517	mRNA transport; protein transport; cell division; DNA repair; cellular response to DNA damage stimulus; cell cycle; mitotic cell cycle; G2/M transition of mitotic cell cycle; regulation of G2/M transition of mitotic cell cycle; ciliary basal body-plasma membrane docking; centriole replication; regulation of cytokinesis; nucleotide-excision repair; global genome nucleotide-excision repair; nucleot…	metal ion binding; calcium ion binding; protein binding; microtubule binding; G-protein beta/gamma-subunit complex binding; heterotrimeric G-protein binding	nucleus; cytoplasm; cytoskeleton; nuclear pore; transcription export complex 2; centrosome; microtubule organizing center; nucleoplasm; cytosol; centriole; nuclear envelope; nuclear pore nuclear basket; intracellular; cilium; photoreceptor connecting cilium; ciliary basal body; XPC complex
PHTF1	1.31159e-06	0.114363	0.297	0.197	0.0480055	regulation of transcription, DNA-templated	DNA binding; DNA-binding transcription factor activity	membrane; integral component of membrane; nucleus; endoplasmic reticulum; cis-Golgi network
HAUS4	1.31801e-06	-0.144146	0.344	0.465	0.0482406	cell division; cell cycle; centrosome cycle; spindle assembly; G2/M transition of mitotic cell cycle; regulation of G2/M transition of mitotic cell cycle; ciliary basal body-plasma membrane docking	protein binding; microtubule minus-end binding	cytoplasm; cytoskeleton; microtubule; HAUS complex; centrosome; microtubule organizing center; spindle; cytosol
TNFRSF1A	1.33045e-06	0.104254	0.152	0.08	0.0486958	negative regulation of inflammatory response; positive regulation of tyrosine phosphorylation of STAT protein; positive regulation of transcription by RNA polymerase II; tumor necrosis factor-mediated signaling pathway; signal transduction; apoptotic process; inflammatory response; positive regulation of inflammatory response; viral process; positive regulation of I-kappaB kinase/NF-kappaB signal…	protein binding; tumor necrosis factor-activated receptor activity; tumor necrosis factor binding	extracellular space; membrane; integral component of membrane; Golgi apparatus; plasma membrane; extracellular region; Golgi membrane; mitochondrion; receptor complex; integral component of plasma membrane; membrane raft; tumor necrosis factor receptor superfamily complex; cell surface
VOPP1	1.36695e-06	-0.153583	0.392	0.497	0.0500319			membrane; integral component of membrane; cytoplasmic vesicle; cytoplasmic vesicle membrane; integral component of organelle membrane; endosome
PNRC1	1.40819e-06	-0.165464	0.664	0.77	0.0515413		protein binding	nucleus
CLDN10	1.44523e-06	0.137276	0.214	0.129	0.0528968	ion transport; cell adhesion; calcium-independent cell-cell adhesion via plasma membrane cell-adhesion molecules; regulation of ion transport	structural molecule activity; identical protein binding	membrane; integral component of membrane; plasma membrane; cell junction; bicellular tight junction; cytoplasm
GTF2I	1.48387e-06	-0.161243	0.927	0.964	0.0543113	transcription by RNA polymerase II; regulation of transcription, DNA-templated; signal transduction; transcription initiation from RNA polymerase II promoter; negative regulation of angiogenesis; negative regulation of cytosolic calcium ion concentration	DNA binding; DNA-binding transcription factor activity; protein binding	nucleus; cytoplasm; membrane; nucleoplasm
MTHFS	1.57938e-06	0.119791	0.254	0.164	0.0578068	folic acid-containing compound biosynthetic process; tetrahydrofolate interconversion; folic acid metabolic process; tetrahydrofolate metabolic process; glutamate metabolic process; formate metabolic process; folic acid catabolic process	metal ion binding; nucleotide binding; ATP binding; ligase activity; 5-formyltetrahydrofolate cyclo-ligase activity; folic acid binding	cytoplasm; cytosol; mitochondrion; mitochondrial matrix
VIM	1.64044e-06	0.209181	0.995	0.986	0.0600416	positive regulation of translation; cellular response to lipopolysaccharide; viral process; cytokine-mediated signaling pathway; muscle filament sliding; cellular response to muramyl dipeptide; positive regulation of gene expression; negative regulation of neuron projection development; astrocyte development; positive regulation of collagen biosynthetic process; regulation of mRNA stability; inte…	protein binding; identical protein binding; structural constituent of cytoskeleton; protein domain specific binding; scaffold protein binding; double-stranded RNA binding; structural constituent of eye lens; keratin filament binding	cytoplasm; nucleus; cytosol; cytoskeleton; intermediate filament; focal adhesion; peroxisome; extracellular exosome; ribonucleoprotein complex; nuclear matrix; polysome; plasma membrane; cell leading edge; cell projection; neuron projection; phagocytic vesicle
AAAS	1.67039e-06	-0.125348	0.297	0.419	0.061138	mRNA transport; protein transport; microtubule bundle formation; intracellular transport of virus; regulation of glycolytic process; mRNA export from nucleus; tRNA export from nucleus; viral process; protein sumoylation; viral transcription; regulation of gene silencing by miRNA; regulation of cellular response to heat; mitotic spindle assembly; regulation of nucleocytoplasmic transport; nucleocy…	protein binding	nucleus; cytoplasm; membrane; centrosome; cytosol; nucleoplasm; nuclear membrane; cytoskeleton; nuclear pore; spindle pole; host cell; nuclear envelope; mitotic spindle
SERTAD4	1.68209e-06	-0.104574	0.144	0.243	0.0615661			nucleus
ACTB	1.70045e-06	0.134649	1	0.999	0.0622382	Fc-gamma receptor signaling pathway involved in phagocytosis; retina homeostasis; protein deubiquitination; substantia nigra development; positive regulation of gene expression, epigenetic; platelet aggregation; membrane organization; ephrin receptor signaling pathway; synaptic vesicle endocytosis; cell motility; postsynaptic actin cytoskeleton organization; ATP-dependent chromatin remodeling; ax…	nucleotide binding; ATP binding; protein binding; identical protein binding; structural constituent of cytoskeleton; protein kinase binding; RNA polymerase II distal enhancer sequence-specific DNA binding; tau protein binding; RNA polymerase II proximal promoter sequence-specific DNA binding; kinesin binding; nucleosomal DNA binding; nitric-oxide synthase binding; Tat protein binding; structural …	cytoplasm; nucleus; membrane; plasma membrane; nuclear chromatin; extracellular space; cytoskeleton; focal adhesion; synapse; nucleoplasm; cytosol; extracellular exosome; blood microparticle; actin filament; protein-containing complex; ribonucleoprotein complex; axon; vesicle; glutamatergic synapse; cytoplasmic ribonucleoprotein granule; actin cytoskeleton; NuA4 histone acetyltransferase complex;…
PGM2	1.70944e-06	-0.105813	0.23	0.34	0.0625671	carbohydrate metabolic process; organic substance metabolic process; glucose metabolic process; neutrophil degranulation; glycogen biosynthetic process; pentose-phosphate shunt; glycogen catabolic process; galactose catabolic process; deoxyribose phosphate catabolic process	metal ion binding; isomerase activity; magnesium ion binding; protein binding; intramolecular transferase activity, phosphotransferases; phosphoglucomutase activity; phosphopentomutase activity	cytoplasm; extracellular region; cytosol; extracellular exosome; secretory granule lumen; ficolin-1-rich granule lumen
SNX3	1.7476e-06	-0.164905	0.896	0.953	0.0639638	protein transport; protein deubiquitination; negative regulation of protein transport; negative regulation of viral entry into host cell; Wnt signaling pathway; negative regulation of protein catabolic process; membrane invagination; positive regulation of neuron projection development; response to bacterium; protein to membrane docking; regulation of Wnt signaling pathway; negative regulation of…	protein binding; phosphatidylinositol binding; lipid binding; phosphatidylinositol-5-phosphate binding; phosphatidylinositol-3-phosphate binding; phosphatidylinositol-3,5-bisphosphate binding; phosphatidylinositol phosphate binding; protein phosphatase binding; phosphatidylinositol-4-phosphate binding	cytosol; cytoplasmic vesicle; endosome; early endosome; clathrin-coated vesicle; extracellular exosome; early endosome membrane; endosome membrane; cytoplasm; early phagosome; retromer complex; phagocytic vesicle
RFC1	1.78152e-06	-0.18491	0.812	0.884	0.0652053	DNA repair; positive regulation of catalytic activity; DNA replication; translesion synthesis; transcription-coupled nucleotide-excision repair; DNA-dependent DNA replication; error-prone translesion synthesis; telomere maintenance via telomerase; DNA damage response, detection of DNA damage; nucleotide-excision repair, DNA incision, 5'-to lesion; nucleotide-excision repair, DNA incision; telomer…	nucleotide binding; ATP binding; DNA binding; protein binding; DNA clamp loader activity; enzyme activator activity; DNA clamp unloader activity; double-stranded DNA binding; protein domain specific binding; sequence-specific DNA binding	nucleus; nucleoplasm; extracellular exosome; DNA replication factor C complex; Elg1 RFC-like complex; nucleolus; cytoplasm; protein-containing complex
TP53TG1	1.93987e-06	0.131087	0.292	0.199	0.071001
PSD3	1.94132e-06	0.190677	0.566	0.492	0.0710541	regulation of ARF protein signal transduction	ARF guanyl-nucleotide exchange factor activity; guanyl-nucleotide exchange factor activity; protein binding; phospholipid binding	membrane; plasma membrane; cell projection; cell junction; synapse; postsynaptic membrane; ruffle membrane; postsynaptic density
SPATS2L	2.02191e-06	0.175399	0.434	0.345	0.0740039		RNA binding; protein binding	nucleus; cytoplasm; nucleolus; cytosol; protein-containing complex
RPL27A	2.02402e-06	0.115609	1	0.999	0.0740812	translation; viral transcription; translational initiation; nuclear-transcribed mRNA catabolic process, nonsense-mediated decay; SRP-dependent cotranslational protein targeting to membrane	RNA binding; structural constituent of ribosome; protein binding	membrane; endoplasmic reticulum; cytosol; ribosome; large ribosomal subunit; cytosolic large ribosomal subunit; intracellular
TMEM35A	2.03777e-06	-0.123282	0.197	0.302	0.0745845			membrane; integral component of membrane; cytoplasmic vesicle; peroxisome; peroxisomal membrane
FOXN3	2.16625e-06	-0.139294	0.455	0.563	0.079287	regulation of transcription, DNA-templated; cell cycle; craniofacial suture morphogenesis; regulation of transcription by RNA polymerase II; negative regulation of transcription, DNA-templated; mitotic G2 DNA damage checkpoint	DNA binding; DNA-binding transcription factor activity; sequence-specific DNA binding; protein binding; DNA-binding transcription factor activity, RNA polymerase II-specific; protein C-terminus binding	nucleus; nuclear chromatin
RAD23A	2.19631e-06	-0.187271	0.718	0.782	0.0803871	nucleotide-excision repair; proteasome-mediated ubiquitin-dependent protein catabolic process; DNA repair; cellular response to DNA damage stimulus; protein deubiquitination; viral process; positive regulation of cell cycle; positive regulation of viral genome replication; protein destabilization; regulation of proteasomal ubiquitin-dependent protein catabolic process; positive regulation of prot…	damaged DNA binding; protein binding; ubiquitin binding; proteasome binding; ubiquitin-specific protease binding; kinase binding; single-stranded DNA binding; polyubiquitin modification-dependent protein binding	nucleus; intracellular membrane-bounded organelle; cytosol; nucleoplasm; proteasome complex; microtubule organizing center; protein-containing complex; cytoplasm
MDM1	2.22356e-06	-0.136751	0.326	0.442	0.0813845	negative regulation of centriole replication; retina development in camera-type eye; photoreceptor cell maintenance	microtubule binding	nucleus; cytoplasm; centrosome; cytosol; cytoskeleton; microtubule; microtubule organizing center; centriole
DMD	2.23957e-06	-0.103662	0.139	0.229	0.0819704	regulation of release of sequestered calcium ion into cytosol by sarcoplasmic reticulum; regulation of cardiac muscle contraction by regulation of the release of sequestered calcium ion; regulation of heart rate; cytoskeleton organization; muscle organ development; cardiac muscle contraction; negative regulation of peptidyl-serine phosphorylation; cellular protein-containing complex assembly; mus…	zinc ion binding; metal ion binding; actin binding; protein binding; structural constituent of cytoskeleton; dystroglycan binding; myosin binding; structural constituent of muscle; vinculin binding; nitric-oxide synthase binding; integrin binding; lamin binding; PDZ domain binding; protein-containing complex binding	cytoplasm; membrane; plasma membrane; cytoskeleton; cell junction; synapse; postsynaptic membrane; cell surface; cytosol; sarcolemma; protein-containing complex; lateral plasma membrane; Z disc; costamere; dystrophin-associated glycoprotein complex; membrane raft; filopodium; syntrophin complex; cell-substrate junction; filopodium membrane; neuron projection terminus; nucleus; mitochondrial outer…
SEC23A	2.27762e-06	0.138373	0.445	0.346	0.0833631	intracellular protein transport; protein transport; endoplasmic reticulum to Golgi vesicle-mediated transport; positive regulation of GTPase activity; vesicle-mediated transport; COPII-coated vesicle budding; antigen processing and presentation of exogenous peptide antigen via MHC class II; COPII vesicle coating; antigen processing and presentation of peptide antigen via MHC class I; COPII-coated…	zinc ion binding; metal ion binding; protein binding; GTPase activator activity	cytoplasm; membrane; endoplasmic reticulum; endoplasmic reticulum membrane; COPII vesicle coat; cytosol; cytoplasmic vesicle; ER to Golgi transport vesicle membrane; endoplasmic reticulum exit site; extrinsic component of membrane; Golgi membrane; COPII-coated ER to Golgi transport vesicle; perinuclear region of cytoplasm
DCBLD2	2.30116e-06	0.192474	0.538	0.454	0.0842246	negative regulation of cell growth; wound healing; intracellular receptor signaling pathway	protein binding	membrane; integral component of membrane; cell surface; integral component of plasma membrane
SRP72	2.34529e-06	0.174873	0.863	0.835	0.08584	SRP-dependent cotranslational protein targeting to membrane; response to drug	RNA binding; 7S RNA binding; protein binding; ribosome binding; signal recognition particle binding; TPR domain binding	cytoplasm; endoplasmic reticulum; signal recognition particle; cytosol; signal recognition particle, endoplasmic reticulum targeting; cell
SLC35F1	2.38701e-06	0.204997	0.509	0.43	0.0873668	transmembrane transport	transmembrane transporter activity	membrane; integral component of membrane
PSRC1	2.39198e-06	0.227875	0.605	0.52	0.0875489	positive regulation of transcription, DNA-templated; cell division; cell cycle; negative regulation of cell growth; mitotic metaphase plate congression; positive regulation of cyclin-dependent protein serine/threonine kinase activity; regulation of mitotic spindle organization; positive regulation of microtubule polymerization; microtubule bundle formation; cellular process	protein binding; microtubule binding	cytoplasm; cytosol; nucleoplasm; cytoskeleton; spindle pole; spindle; spindle microtubule; microtubule cytoskeleton; midbody
NME3	2.45082e-06	-0.160474	0.439	0.551	0.0897024	phosphorylation; apoptotic process; nucleoside diphosphate phosphorylation; GTP biosynthetic process; UTP biosynthetic process; CTP biosynthetic process; nucleotide metabolic process; purine nucleotide metabolic process; pyrimidine nucleotide metabolic process; nucleobase-containing small molecule interconversion	metal ion binding; nucleotide binding; ATP binding; kinase activity; transferase activity; protein binding; nucleoside diphosphate kinase activity	cytosol
BCL2	2.46331e-06	-0.111593	0.23	0.34	0.0901595	negative regulation of apoptotic process; regulation of apoptotic process; cellular response to DNA damage stimulus; cell morphogenesis; ossification; ovarian follicle development; metanephros development; ureteric bud development; branching involved in ureteric bud morphogenesis; behavioral fear response; leukocyte homeostasis; B cell homeostasis; kidney development; release of cytochrome c from…	protein homodimerization activity; protein binding; transcription factor binding; protein phosphatase binding; protein heterodimerization activity; protein phosphatase 2A binding; identical protein binding; BH3 domain binding; ubiquitin protein ligase binding; protease binding; sequence-specific DNA binding; channel activity; channel inhibitor activity; repressing transcription factor binding	nucleus; cytoplasm; membrane; integral component of membrane; nucleoplasm; endoplasmic reticulum; endoplasmic reticulum membrane; mitochondrion; nuclear membrane; cytosol; mitochondrial membrane; myelin sheath; mitochondrial outer membrane; protein-containing complex; pore complex
CALM1	2.51356e-06	0.180326	1	0.997	0.0919989	calcium-mediated signaling; regulation of release of sequestered calcium ion into cytosol by sarcoplasmic reticulum; regulation of cardiac muscle contraction by regulation of the release of sequestered calcium ion; regulation of heart rate; phosphorylation; G protein-coupled receptor signaling pathway; Fc-epsilon receptor signaling pathway; MAPK cascade; substantia nigra development; platelet deg…	metal ion binding; calcium ion binding; kinase activity; protein binding; ion channel binding; protein domain specific binding; protein kinase binding; titin binding; disordered domain specific binding; protein serine/threonine kinase activator activity; calcium channel inhibitor activity; adenylate cyclase binding; adenylate cyclase activator activity; N-terminal myristoylation domain binding; p…	nucleus; cytoplasm; plasma membrane; cytoskeleton; spindle pole; centrosome; microtubule organizing center; spindle; extracellular region; nucleoplasm; cytosol; spindle microtubule; protein-containing complex; vesicle; calcium channel complex; sarcomere; catalytic complex; myelin sheath; synaptic vesicle membrane; mitochondrial membrane; growth cone; neuron projection
LRIG1	2.59538e-06	-0.137143	0.269	0.382	0.0949937	sensory perception of sound; hair cycle process; otolith morphogenesis; innervation	protein binding	membrane; integral component of membrane; plasma membrane; extracellular space; extracellular matrix
IFT57	2.66028e-06	0.197821	0.62	0.556	0.0973688	apoptotic process; intraciliary transport involved in cilium assembly; activation of cysteine-type endopeptidase activity involved in apoptotic process; regulation of apoptotic process; intraciliary transport; non-motile cilium assembly; neural tube closure; heart looping; smoothened signaling pathway; motile cilium assembly; negative regulation of epithelial cell proliferation; left/right patter…	DNA binding; protein binding	cytoplasm; cytoskeleton; cell projection; Golgi apparatus; cilium; ciliary basal body; intraciliary transport particle B; ciliary tip; centrosome; axoneme; photoreceptor connecting cilium; dendrite terminus
HNRNPF	2.7101e-06	-0.142255	0.778	0.858	0.0991922	mRNA processing; RNA splicing; mRNA splicing, via spliceosome; regulation of RNA splicing; interleukin-12-mediated signaling pathway; fibroblast growth factor receptor signaling pathway; RNA metabolic process; RNA processing	nucleic acid binding; RNA binding; protein binding; single-stranded RNA binding; transcription factor binding; TBP-class protein binding	nucleus; membrane; cytosol; nucleoplasm; spliceosomal complex; catalytic step 2 spliceosome; plasma membrane
DAAM1	2.82621e-06	0.214758	0.822	0.793	0.103442	actin cytoskeleton organization; Wnt signaling pathway; cellular component organization; Wnt signaling pathway, planar cell polarity pathway	actin binding; protein binding; identical protein binding; Rho GTPase binding	cytoplasm; membrane; cytosol; motile cilium; plasma membrane; cytoskeleton; cell projection; ciliary basal body; stress fiber
MYO1B	2.94715e-06	0.179442	0.308	0.22	0.107869	actin filament organization; actin filament bundle assembly; post-Golgi vesicle-mediated transport; actin filament-based movement	nucleotide binding; ATP binding; motor activity; actin binding; calmodulin binding; cadherin binding; actin filament binding; phosphatidylinositol-4,5-bisphosphate binding; phosphatidylinositol-3,4,5-trisphosphate binding; microfilament motor activity; protein binding; actin-dependent ATPase activity	myosin complex; cytoplasm; plasma membrane; perinuclear region of cytoplasm; early endosome; filopodium; extracellular exosome; cell periphery; endosome membrane; brush border; actin filament; trans-Golgi network membrane; apical part of cell
MRPL40	2.99481e-06	-0.152735	0.444	0.55	0.109613	anatomical structure morphogenesis; mitochondrial translational elongation; mitochondrial translational termination	RNA binding; protein binding	mitochondrion; ribosome; mitochondrial large ribosomal subunit; nucleus; mitochondrial inner membrane; mitochondrial ribosome
FGFBP3	3.04348e-06	-0.11781	0.542	0.653	0.111395	cell-cell signaling; positive regulation of vascular permeability; positive regulation of fibroblast growth factor receptor signaling pathway	heparin binding; growth factor binding; fibroblast growth factor binding	extracellular region; collagen-containing extracellular matrix
RHOBTB3	3.08183e-06	-0.145649	0.804	0.881	0.112798	vesicle-mediated transport; motor neuron axon guidance; retrograde transport, endosome to Golgi; Rho protein signal transduction; regulation of cell shape; actin cytoskeleton organization; actin filament organization; regulation of actin cytoskeleton organization; engulfment of apoptotic cell; establishment or maintenance of cell polarity; male gonad development	GTPase activity; GTP binding; ATPase activity; Rab GTPase binding; nucleotide binding; ATP binding; hydrolase activity; protein binding; protein kinase binding	cytosol; Golgi apparatus; cytoplasm; plasma membrane; extracellular exosome; cell cortex; trans-Golgi network membrane; cell projection
OPHN1	3.20826e-06	-0.121525	0.168	0.262	0.117426	signal transduction; positive regulation of GTPase activity; nervous system development; endocytosis; regulation of small GTPase mediated signal transduction; actin cytoskeleton organization; cell junction assembly; establishment of epithelial cell apical/basal polarity; regulation of synaptic transmission, glutamatergic; synaptic vesicle endocytosis; axon guidance; substrate-dependent cell migra…	GTPase activator activity; actin binding; phospholipid binding; ionotropic glutamate receptor binding	cytoplasm; cell projection; cell junction; synapse; dendrite; axon; cytosol; actin cytoskeleton; dendritic spine; glutamatergic synapse; terminal bouton
OLFM1	3.2772e-06	-0.135044	0.258	0.369	0.119949	nervous system development; multicellular organism development; positive regulation of apoptotic process; positive regulation of gene expression; cardiac epithelial to mesenchymal transition; negative regulation of gene expression; regulation of axon extension; neuronal signal transduction; atrioventricular valve formation; positive regulation of epithelial to mesenchymal transition	protein binding	endoplasmic reticulum; cell; extracellular space; cell projection; extracellular region; cell junction; synapse; axon; perikaryon; axonal growth cone; neuronal cell body
KCNQ2	3.33673e-06	0.145993	0.708	0.623	0.122127	transmembrane transport; ion transport; potassium ion transport; regulation of ion transmembrane transport; potassium ion transmembrane transport; nervous system development; chemical synaptic transmission	ion channel activity; voltage-gated ion channel activity; voltage-gated potassium channel activity; potassium channel activity; delayed rectifier potassium channel activity; calmodulin binding; protein binding; ankyrin binding	membrane; integral component of membrane; voltage-gated potassium channel complex; plasma membrane; integral component of plasma membrane; node of Ranvier; axon initial segment
MSH6	3.35948e-06	-0.196102	0.688	0.745	0.12296	DNA repair; cellular response to DNA damage stimulus; mismatch repair; viral process; negative regulation of DNA recombination; intrinsic apoptotic signaling pathway in response to DNA damage; determination of adult lifespan; meiotic mismatch repair; somatic recombination of immunoglobulin gene segments; maintenance of DNA repeat elements; positive regulation of helicase activity; response to UV;…	nucleotide binding; ATP binding; DNA binding; mismatched DNA binding; protein binding; enzyme binding; methylated histone binding; four-way junction DNA binding; DNA-dependent ATPase activity; MutLalpha complex binding; ATPase activity; single guanine insertion binding; oxidized purine DNA binding; magnesium ion binding; double-stranded DNA binding; guanine/thymine mispair binding; single thymine…	nucleus; Golgi apparatus; intracellular membrane-bounded organelle; cytosol; nucleoplasm; chromosome; MutSalpha complex; mismatch repair complex; nuclear chromatin
DRAXIN	3.44782e-06	0.208309	0.667	0.591	0.126194	axon guidance; multicellular organism development; Wnt signaling pathway; negative regulation of canonical Wnt signaling pathway; forebrain development; dorsal spinal cord development; commissural neuron differentiation in spinal cord; negative regulation of axon extension; negative regulation of neuron apoptotic process	protein binding	extracellular region
KIF1A	3.49144e-06	-0.160437	0.592	0.703	0.12779	microtubule-based movement; vesicle-mediated transport; cytoskeleton-dependent intracellular transport; anterograde axonal transport; anterograde neuronal dense core vesicle transport; retrograde neuronal dense core vesicle transport; interkinetic nuclear migration; protein transport along microtubule	nucleotide binding; ATP binding; microtubule motor activity; microtubule binding; identical protein binding; ATPase activity; motor activity; ATP-dependent microtubule motor activity, plus-end-directed; protein binding; protein homodimerization activity	cytoplasm; axon cytoplasm; cytoskeleton; microtubule; neuron projection; axon; dendrite; kinesin complex; cytosol; synaptic vesicle; protein-containing complex; neuronal cell body; presynapse; postsynapse
CSRNP3	3.52527e-06	0.184479	0.401	0.306	0.129028	apoptotic process; positive regulation of transcription by RNA polymerase II; positive regulation of apoptotic process; negative regulation of phosphatase activity	DNA binding; DNA-binding transcription factor activity; DNA-binding transcription factor activity, RNA polymerase II-specific; DNA-binding transcription activator activity, RNA polymerase II-specific; sequence-specific DNA binding	nucleus; nuclear chromatin
LY6E	3.68279e-06	-0.13986	0.387	0.495	0.134794	negative regulation of signaling receptor activity; cell surface receptor signaling pathway	acetylcholine receptor inhibitor activity	membrane; plasma membrane; extracellular region; anchored component of membrane
SSX2IP	3.71754e-06	0.162231	0.481	0.388	0.136066	cell adhesion; cilium assembly; cell projection organization; centrosome cycle; intraciliary transport involved in cilium assembly; regulation of Rac protein signal transduction; regulation of cell motility	protein binding; protein domain specific binding	nucleus; cytoplasm; cytoskeleton; cell projection; cell junction; microtubule organizing center; ciliary basal body; centriolar satellite; adherens junction; protein-containing complex; cell-cell adherens junction; cell leading edge
MAPRE1	3.79521e-06	0.155906	0.781	0.723	0.138908	cell division; cell cycle; regulation of microtubule polymerization or depolymerization; spindle assembly; G2/M transition of mitotic cell cycle; regulation of G2/M transition of mitotic cell cycle; ciliary basal body-plasma membrane docking; protein localization to microtubule; negative regulation of microtubule polymerization; positive regulation of microtubule polymerization; cell migration; p…	RNA binding; protein binding; microtubule binding; identical protein binding; cadherin binding; microtubule plus-end binding; protein C-terminus binding; protein kinase binding	cytoplasm; Golgi apparatus; cytoskeleton; microtubule; centrosome; microtubule organizing center; spindle; cytosol; cytoplasmic microtubule; microtubule plus-end; spindle midzone; focal adhesion; microtubule cytoskeleton; cortical microtubule cytoskeleton; cell projection membrane; cell projection; mitotic spindle astral microtubule end
MAD2L1	3.83346e-06	0.164221	0.941	0.948	0.140308	negative regulation of apoptotic process; cell division; cell cycle; anaphase-promoting complex-dependent catabolic process; regulation of mitotic cell cycle phase transition; mitotic spindle assembly checkpoint; ubiquitin-dependent protein catabolic process; negative regulation of protein catabolic process; establishment of mitotic spindle orientation; positive regulation of mitotic cell cycle s…	protein homodimerization activity; protein binding; identical protein binding; protein C-terminus binding	nucleus; cytoplasm; nucleoplasm; chromosome; cytosol; cytoskeleton; perinuclear region of cytoplasm; spindle pole; chromosome, centromeric region; kinetochore; condensed chromosome kinetochore; mitotic spindle; nuclear pore nuclear basket
AMPH	3.9259e-06	0.127817	0.3	0.207	0.143692	membrane organization; chemical synaptic transmission; synaptic vesicle endocytosis; endocytosis	protein binding; phospholipid binding	cytoplasm; membrane; cytoskeleton; cell junction; cytoplasmic vesicle; synapse; plasma membrane; cytosol; synaptic vesicle; actin cytoskeleton; synaptic vesicle membrane; leading edge membrane
PSME1	3.94997e-06	-0.167696	0.78	0.845	0.144573	Fc-epsilon receptor signaling pathway; T cell receptor signaling pathway; MAPK cascade; protein polyubiquitination; stimulatory C-type lectin receptor signaling pathway; antigen processing and presentation of exogenous peptide antigen via MHC class I, TAP-dependent; regulation of cellular amino acid metabolic process; negative regulation of G2/M transition of mitotic cell cycle; protein deubiquit…	protein binding; endopeptidase activator activity	cytoplasm; proteasome complex; proteasome activator complex; nucleoplasm; cytosol; extracellular exosome
SERPINE2	3.97731e-06	0.168154	0.352	0.257	0.145574	multicellular organism development; cell differentiation; nervous system development; negative regulation of peptidase activity; negative regulation of endopeptidase activity; regulation of cell migration; blood coagulation; negative regulation of proteolysis; negative regulation of blood coagulation; negative regulation of plasminogen activation; negative regulation of protein processing; positi…	protein binding; heparin binding; serine-type endopeptidase inhibitor activity; peptidase inhibitor activity; signaling receptor binding; glycosaminoglycan binding	extracellular space; extracellular region; collagen-containing extracellular matrix; cytosol; extracellular vesicle; extrinsic component of external side of plasma membrane; platelet alpha granule; neuromuscular junction
CASK	3.98023e-06	0.151205	0.455	0.362	0.14568	negative regulation of cell-matrix adhesion; protein phosphorylation; phosphorylation; GMP metabolic process; GDP metabolic process; cell adhesion; neurotransmitter secretion; negative regulation of keratinocyte proliferation; negative regulation of wound healing; negative regulation of cellular response to growth factor stimulus; positive regulation of transcription by RNA polymerase II; calcium…	nucleotide binding; protein kinase activity; protein serine/threonine kinase activity; ATP binding; kinase activity; transferase activity; protein binding; calmodulin binding; guanylate kinase activity; neurexin family protein binding	cytoplasm; nucleus; membrane; plasma membrane; focal adhesion; cytosol; actin cytoskeleton; nucleolus; basement membrane; nuclear lamina; cell-cell junction; nuclear matrix; presynaptic membrane; ciliary membrane; basolateral plasma membrane; vesicle; synapse; Schaffer collateral - CA1 synapse; integral component of membrane
MAGI1	4.01443e-06	0.19962	0.687	0.613	0.146932	signal transduction; cell adhesion; cell surface receptor signaling pathway; protein-containing complex assembly; positive regulation of cell-cell adhesion	nucleotide binding; ATP binding; protein binding; molecular adaptor activity; protein C-terminus binding; alpha-actinin binding	cytoplasm; plasma membrane; membrane; nucleoplasm; cell junction; cell projection; bicellular tight junction; cell-cell junction; adherens junction; cell periphery; nucleus
LRRC17	4.06436e-06	-0.15535	0.269	0.374	0.14876	ossification; negative regulation of osteoclast differentiation; bone marrow development	protein binding	extracellular space; extracellular region; extracellular matrix
TSPAN18	4.24907e-06	-0.158296	0.357	0.465	0.15552			membrane; integral component of membrane; integral component of plasma membrane
SPA17	4.27236e-06	0.194117	0.54	0.457	0.156373	binding of sperm to zona pellucida; single fertilization; spermatogenesis; epithelial cilium movement involved in extracellular fluid movement	protein binding; calmodulin binding	cytoplasm; membrane; extracellular region; cilium; motile cilium; sperm fibrous sheath; sperm principal piece; external side of plasma membrane
SPATA13	4.36962e-06	-0.16063	0.276	0.374	0.159933	regulation of Rho protein signal transduction; cell migration; filopodium assembly; regulation of cell migration; lamellipodium assembly	Rho guanyl-nucleotide exchange factor activity; protein binding; guanyl-nucleotide exchange factor activity; Rac guanyl-nucleotide exchange factor activity	cytoplasm; membrane; cytosol; nucleoplasm; plasma membrane; cell projection; lamellipodium; filopodium; ruffle membrane
CHD7	4.56586e-06	0.247716	0.85	0.829	0.167115	chromatin organization; DNA duplex unwinding; rRNA processing; secondary palate development; heart morphogenesis; regulation of transcription, DNA-templated; skeletal system development; in utero embryonic development; retina development in camera-type eye; cranial nerve development; genitalia development; face development; T cell differentiation; limb development; cognition; central nervous syst…	nucleotide binding; ATP binding; hydrolase activity; DNA binding; protein binding; DNA helicase activity; helicase activity; hydrolase activity, acting on acid anhydrides; chromatin binding; RNA polymerase II proximal promoter sequence-specific DNA binding; promoter-specific chromatin binding	nucleus; nucleolus; nucleoplasm
TMEM38B	4.71211e-06	-0.110247	0.157	0.252	0.172468	ion transmembrane transport; cation transmembrane transport; monovalent inorganic cation transport; ion transport; potassium ion transport; potassium ion transmembrane transport; ossification; endoplasmic reticulum organization; phospholipid biosynthetic process; regulation of cardiac muscle contraction by regulation of the release of sequestered calcium ion; release of sequestered calcium ion in…	cation channel activity; potassium channel activity	membrane; nucleus; integral component of membrane; endoplasmic reticulum; endoplasmic reticulum membrane; sarcoplasmic reticulum membrane; nuclear membrane
LZTS1	4.92559e-06	0.114985	0.153	0.083	0.180282	cell cycle; regulation of transcription, DNA-templated; transcription, DNA-templated; negative regulation of macroautophagy; mitotic cell cycle phase transition; regulation of synaptic plasticity; regulation of dendrite morphogenesis	DNA binding; protein binding; microtubule binding; DNA-binding transcription factor activity	cytoplasm; membrane; plasma membrane; cell projection; cell junction; synapse; postsynaptic membrane; postsynaptic density; dendritic spine; apical plasma membrane; neuron projection; dendritic shaft; cell body
AMER2	5.08226e-06	0.130406	0.303	0.209	0.186016	Wnt signaling pathway; negative regulation of canonical Wnt signaling pathway; regulation of canonical Wnt signaling pathway; ectoderm development	lipid binding; protein binding; phosphatidylinositol-4,5-bisphosphate binding; beta-catenin binding	membrane; plasma membrane
AKAP9	5.19567e-06	0.188707	0.842	0.773	0.190167	regulation of ventricular cardiac muscle cell membrane repolarization; signal transduction; G2/M transition of mitotic cell cycle; regulation of G2/M transition of mitotic cell cycle; ciliary basal body-plasma membrane docking; positive regulation of peptidyl-serine phosphorylation; cardiac conduction; chemical synaptic transmission; regulation of membrane repolarization; regulation of heart rate…	DNA binding; protein binding; molecular adaptor activity; potassium channel regulator activity; ion channel binding; signaling receptor binding; protein kinase A regulatory subunit binding; kinase activity	cytoplasm; Golgi apparatus; intracellular membrane-bounded organelle; centrosome; cytoskeleton; Golgi stack; microtubule organizing center; cis-Golgi network; cytosol; glutamatergic synapse; voltage-gated potassium channel complex; synaptic membrane; neuronal cell body; dendritic branch; extrinsic component of postsynaptic density membrane
RPL41	5.29715e-06	-0.116727	1	1	0.193881	translation; cytoplasmic translation; viral transcription; translational initiation; nuclear-transcribed mRNA catabolic process, nonsense-mediated decay; SRP-dependent cotranslational protein targeting to membrane	structural constituent of ribosome; RNA binding; mRNA 3'-UTR binding; mRNA 5'-UTR binding	ribosome; cytosol; cytosolic large ribosomal subunit; polysomal ribosome
SELENOP	5.38447e-06	-0.107132	0.072	0.144	0.197077	response to oxidative stress; platelet degranulation; response to selenium ion; selenium compound metabolic process; brain development; locomotory behavior; post-embryonic development; sexual reproduction; regulation of growth	selenium binding	extracellular region; extracellular space; extracellular exosome; platelet dense granule lumen; membrane; integral component of membrane
C11orf58	5.4146e-06	0.129377	0.938	0.949	0.19818
SORT1	5.48056e-06	0.173345	0.419	0.334	0.200594	negative regulation of lipoprotein lipase activity; response to insulin; multicellular organism development; cell differentiation; endocytosis; Golgi to endosome transport; ossification; vesicle organization; post-Golgi vesicle-mediated transport; G protein-coupled receptor signaling pathway; extrinsic apoptotic signaling pathway via death domain receptors; neuropeptide signaling pathway; regulat…	protein binding; enzyme binding; nerve growth factor binding; nerve growth factor receptor activity; neurotensin receptor activity, non-G protein-coupled	perinuclear region of cytoplasm; nucleus; membrane; integral component of membrane; Golgi apparatus; cytosol; endoplasmic reticulum; endoplasmic reticulum membrane; lysosomal membrane; plasma membrane; lysosome; endosome; Golgi cisterna membrane; endosome membrane; nuclear membrane; cell surface; cytoplasmic vesicle; early endosome; clathrin-coated pit; clathrin-coated vesicle; trans-Golgi networ…
RNF19A	5.60164e-06	0.159752	0.375	0.282	0.205026	protein ubiquitination; ubiquitin-dependent protein catabolic process; protein polyubiquitination; positive regulation of proteasomal ubiquitin-dependent protein catabolic process; microtubule cytoskeleton organization; regulation of protein catabolic process at postsynapse, modulating synaptic transmission	metal ion binding; transferase activity; ubiquitin-protein transferase activity; ubiquitin protein ligase activity; transcription factor binding; ubiquitin conjugating enzyme binding	cytoplasm; membrane; integral component of membrane; cytoskeleton; centrosome; microtubule organizing center; postsynapse; ubiquitin ligase complex; cytosol; hippocampal mossy fiber to CA3 synapse; glutamatergic synapse
AP1AR	5.71629e-06	-0.168035	0.346	0.456	0.209222	protein transport; regulation of Arp2/3 complex-mediated actin nucleation; vesicle targeting, trans-Golgi to endosome; negative regulation of substrate adhesion-dependent cell spreading; negative regulation of cell motility; cellular protein localization; negative regulation of receptor recycling	AP-1 adaptor complex binding; kinesin binding	Golgi apparatus; cytosol; endosome; early endosome; late endosome; transport vesicle
CDH4	6.01946e-06	-0.101727	0.326	0.446	0.220318	cell adhesion; homophilic cell adhesion via plasma membrane adhesion molecules; cell-cell adhesion; cell-cell junction assembly; adherens junction organization; cell morphogenesis; calcium-dependent cell-cell adhesion via plasma membrane cell adhesion molecules; cell-cell adhesion mediated by cadherin; heterophilic cell-cell adhesion via plasma membrane cell adhesion molecules; axon guidance; pos…	metal ion binding; calcium ion binding; cadherin binding; protein homodimerization activity; cytoskeletal protein binding	membrane; integral component of membrane; plasma membrane; cell surface; cell-cell adherens junction; catenin complex; integral component of plasma membrane
THAP5	6.11499e-06	-0.146476	0.396	0.5	0.223815	cell cycle; regulation of transcription by RNA polymerase II; negative regulation of cell cycle	nucleic acid binding; metal ion binding; DNA binding; DNA-binding transcription factor activity, RNA polymerase II-specific; protease binding	nucleus; nuclear chromatin
GULP1	6.38073e-06	-0.138328	0.333	0.443	0.233541	apoptotic process; lipid transport; phagocytosis; phagocytosis, engulfment	protein binding	cytoplasm
PAM	6.43359e-06	0.1576	0.46	0.366	0.235476	oxidation-reduction process; metabolic process; peptide metabolic process; peptide amidation; fatty acid primary amide biosynthetic process; response to hypoxia; long-chain fatty acid metabolic process; regulation of transcription by RNA polymerase II; central nervous system development; heart development; lactation; response to pH; toxin metabolic process; protein amidation; protein metabolic pr…	metal ion binding; monooxygenase activity; oxidoreductase activity; zinc ion binding; catalytic activity; lyase activity; calcium ion binding; copper ion binding; protein binding; oxidoreductase activity, acting on paired donors, with incorporation or reduction of molecular oxygen, reduced ascorbate as one donor, and incorporation of one atom of oxygen; L-ascorbic acid binding; peptidylglycine mo…	membrane; integral component of membrane; extracellular region; cytoplasmic vesicle; extracellular exosome; transport vesicle membrane; secretory granule membrane; extracellular space; trans-Golgi network; plasma membrane; cell surface; secretory granule; neuron projection; neuronal cell body; perikaryon; perinuclear region of cytoplasm
STX10	6.60587e-06	-0.114601	0.367	0.479	0.241782	vesicle-mediated transport; Golgi vesicle transport; intracellular protein transport; protein transport; retrograde transport, endosome to Golgi; vesicle fusion; vesicle docking; regulation of protein localization; membrane fusion	SNAP receptor activity; protein binding; SNARE binding; syntaxin binding	membrane; integral component of membrane; cytosol; Golgi apparatus; Golgi membrane; perinuclear region of cytoplasm; trans-Golgi network; SNARE complex; endomembrane system; synaptic vesicle; trans-Golgi network membrane; vesicle; integral component of synaptic vesicle membrane; cell
MEX3B	6.63381e-06	-0.110807	0.232	0.345	0.242804	protein phosphorylation; protein autophosphorylation	nucleic acid binding; RNA binding; metal ion binding; calcium ion binding	nucleus; cytoplasm; cytosol; nucleoplasm; P-body
STK11	6.85381e-06	-0.104052	0.188	0.289	0.250856	positive regulation of transforming growth factor beta receptor signaling pathway; protein phosphorylation; phosphorylation; cellular response to DNA damage stimulus; cell cycle; apoptotic process; autophagy; cell differentiation; regulation of cell growth; spermatogenesis; establishment of cell polarity; glucose homeostasis; negative regulation of cell population proliferation; negative regulati…	metal ion binding; nucleotide binding; protein kinase activity; protein serine/threonine kinase activity; ATP binding; kinase activity; transferase activity; protein binding; magnesium ion binding; protein kinase activator activity; p53 binding; LRR domain binding	nucleus; cytoplasm; membrane; cytosol; nucleoplasm; mitochondrion; extracellular exosome
POU3F4	6.9953e-06	0.138926	0.312	0.22	0.256035	regulation of transcription, DNA-templated; regulation of transcription by RNA polymerase II; brain development; transcription by RNA polymerase II; sensory perception of sound; forebrain neuron differentiation; inner ear development; cochlea morphogenesis; negative regulation of mesenchymal cell apoptotic process	DNA binding; DNA-binding transcription factor activity; sequence-specific DNA binding; RNA polymerase II regulatory region sequence-specific DNA binding; AT DNA binding; double-stranded DNA binding	nucleus
PLAGL1	7.0533e-06	0.175183	0.499	0.402	0.258158	regulation of transcription by RNA polymerase II; DNA damage response, signal transduction by p53 class mediator resulting in cell cycle arrest; positive regulation of transcription by RNA polymerase II; apoptotic process; cell cycle arrest	nucleic acid binding; metal ion binding; DNA binding; RNA polymerase II regulatory region sequence-specific DNA binding; DNA-binding transcription activator activity, RNA polymerase II-specific; DNA-binding transcription factor activity, RNA polymerase II-specific	nucleus; Golgi apparatus; intracellular membrane-bounded organelle; nuclear body; nucleoplasm
FYN	7.21429e-06	0.178484	0.817	0.757	0.26405	cellular response to amyloid-beta; response to amyloid-beta; negative regulation of dendritic spine maintenance; negative regulation of oxidative stress-induced cell death; protein phosphorylation; phosphorylation; calcium ion transport; multicellular organism development; immune system process; adaptive immune response; Fc-gamma receptor signaling pathway involved in phagocytosis; leukocyte migr…	protein binding; metal ion binding; nucleotide binding; protein kinase activity; ATP binding; kinase activity; transferase activity; protein tyrosine kinase activity; non-membrane spanning protein tyrosine kinase activity; identical protein binding; signaling receptor binding; tau protein binding; growth factor receptor binding; tau-protein kinase activity; disordered domain specific binding; typ…	cytosol; plasma membrane; nucleus; cytoplasm; membrane; extrinsic component of cytoplasmic side of plasma membrane; cell body; endosome; membrane raft; postsynaptic density; dendrite; perinuclear region of cytoplasm; glial cell projection; mitochondrion; perinuclear endoplasmic reticulum; actin filament; intracellular membrane-bounded organelle; cell periphery; Schaffer collateral - CA1 synapse; …
H2AFZ	7.43688e-06	0.102808	1	1	0.272197	chromatin organization; positive regulation of transcription by RNA polymerase II; cellular response to estradiol stimulus	DNA binding; protein heterodimerization activity; chromatin DNA binding; protein binding; RNA polymerase II distal enhancer sequence-specific DNA binding; RNA polymerase II proximal promoter sequence-specific DNA binding; RNA polymerase II core promoter sequence-specific DNA binding; nucleosomal DNA binding	nucleus; nucleosome; chromosome; nuclear chromatin; extracellular exosome; nuclear euchromatin; nuclear heterochromatin
2003-08-01	7.48426e-06	-0.171667	0.525	0.632	0.273931	translational initiation; nucleic acid phosphodiester bond hydrolysis; RNA phosphodiester bond hydrolysis, endonucleolytic; gene silencing by RNA; regulation of translation; regulation of megakaryocyte differentiation; Wnt signaling pathway, calcium modulating pathway; pre-miRNA processing; production of miRNAs involved in gene silencing by miRNA; mRNA catabolic process; miRNA mediated inhibition…	translation initiation factor activity; protein binding; nucleic acid binding; RNA binding; metal ion binding; hydrolase activity; endonuclease activity; nuclease activity; endoribonuclease activity; double-stranded RNA binding; miRNA binding; single-stranded RNA binding; endoribonuclease activity, cleaving miRNA-paired mRNA	nucleoplasm; cytoplasmic ribonucleoprotein granule; cytoplasm; membrane; P-body; RISC complex; cytosol; RISC-loading complex; condensed nuclear chromosome
FBXO17	7.89723e-06	-0.104831	0.209	0.315	0.289047	protein polyubiquitination; post-translational protein modification; SCF-dependent proteasomal ubiquitin-dependent protein catabolic process; glycoprotein catabolic process; ubiquitin-dependent ERAD pathway	protein binding; ubiquitin protein ligase activity	cytoplasm; cytosol; SCF ubiquitin ligase complex
TTYH3	7.89827e-06	-0.145835	0.447	0.557	0.289085	ion transport; chloride transport; chloride transmembrane transport; ion transmembrane transport	chloride channel activity; intracellular calcium activated chloride channel activity; volume-sensitive chloride channel activity	membrane; integral component of membrane; plasma membrane; chloride channel complex; extracellular exosome
CDH20	7.94308e-06	0.104586	0.285	0.19	0.290725	cell adhesion; homophilic cell adhesion via plasma membrane adhesion molecules; cell-cell adhesion	metal ion binding; calcium ion binding	membrane; integral component of membrane; plasma membrane
COL4A2	7.95821e-06	-0.133759	0.44	0.555	0.291278	transcription, DNA-templated; aging; response to activity; collagen-activated tyrosine kinase receptor signaling pathway; cellular response to transforming growth factor beta stimulus; extracellular matrix organization; angiogenesis; negative regulation of angiogenesis; endodermal cell differentiation	protein binding; extracellular matrix structural constituent; extracellular matrix structural constituent conferring tensile strength	extracellular region; collagen trimer; collagen type IV trimer; basement membrane; extracellular space; extracellular matrix; extracellular exosome; collagen-containing extracellular matrix; endoplasmic reticulum lumen
GALNT11	8.34667e-06	-0.131944	0.449	0.549	0.305496	protein glycosylation; Notch signaling pathway; cilium assembly; regulation of Notch signaling pathway; O-glycan processing; determination of left/right symmetry; Notch receptor processing; protein O-linked glycosylation via threonine; Notch signaling involved in heart development	metal ion binding; transferase activity; carbohydrate binding; transferase activity, transferring glycosyl groups; Notch binding; polypeptide N-acetylgalactosaminyltransferase activity	membrane; integral component of membrane; Golgi apparatus; Golgi membrane
SIPA1L1	8.44836e-06	0.175573	0.395	0.311	0.309219	actin cytoskeleton reorganization; regulation of GTPase activity; regulation of small GTPase mediated signal transduction; activation of GTPase activity; regulation of dendrite morphogenesis; regulation of synaptic plasticity; ephrin receptor signaling pathway; regulation of axonogenesis; regulation of dendritic spine morphogenesis; positive regulation of GTPase activity	GTPase activator activity; protein binding; ephrin receptor binding	cytoplasm; membrane; plasma membrane; cytoskeleton; cell junction; synapse; postsynaptic membrane; postsynaptic density; dendritic spine; neuron projection
SOX6	8.49628e-06	0.181675	0.4	0.318	0.310972	negative regulation of cardiac muscle cell differentiation; regulation of transcription, DNA-templated; multicellular organism development; muscle organ development; positive regulation of transcription by RNA polymerase II; negative regulation of transcription, DNA-templated; positive regulation of chondrocyte differentiation; cellular response to transforming growth factor beta stimulus; cell f…	DNA binding; DNA-binding transcription factor activity; protein binding; DNA-binding transcription factor activity, RNA polymerase II-specific; RNA polymerase II proximal promoter sequence-specific DNA binding; DNA-binding transcription repressor activity, RNA polymerase II-specific; sequence-specific DNA binding; transcription regulatory region DNA binding; protein heterodimerization activity	nucleus; nucleoplasm; nuclear chromatin
RSBN1L	8.59306e-06	-0.148683	0.631	0.731	0.314515	oxidation-reduction process	metal ion binding; oxidoreductase activity; dioxygenase activity	nucleus
GLI2	8.84167e-06	0.152667	0.434	0.349	0.323614	multicellular organism development; kidney development; positive regulation of transcription, DNA-templated; negative regulation of transcription by RNA polymerase II; neuron development; smoothened signaling pathway; positive regulation of transcription by RNA polymerase II; skeletal system development; heart development; cell population proliferation; proximal/distal pattern formation; axon gui…	nucleic acid binding; metal ion binding; zinc ion binding; DNA binding; DNA-binding transcription factor activity; protein binding; sequence-specific DNA binding; DNA-binding transcription factor activity, RNA polymerase II-specific; transcription factor binding; promoter-specific chromatin binding; RNA polymerase II proximal promoter sequence-specific DNA binding; DNA-binding transcription activ…	nucleus; cytoplasm; nucleolus; cell projection; cilium; ciliary tip; nucleoplasm; cytosol; ciliary base; axoneme; membrane; nuclear speck; motile cilium
LPP	9.12035e-06	0.190305	0.372	0.284	0.333814	cell adhesion; cell-cell adhesion	metal ion binding; protein binding	cytosol; focal adhesion; nucleus; cytoplasm; membrane; plasma membrane; cell junction; stress fiber
DIAPH1	9.53959e-06	0.132568	0.378	0.29	0.349158	actin filament organization; actin cytoskeleton organization; actin filament polymerization; cellular component organization; cytoskeleton organization; sensory perception of sound; neutrophil degranulation; regulation of cell shape; regulation of cell motility; regulation of cytoskeleton organization; positive regulation of cell migration; regulation of microtubule-based process; protein localiz…	RNA binding; actin binding; protein binding; Rho GTPase binding; ion channel binding; signaling receptor binding	nucleus; cytoplasm; membrane; plasma membrane; cytoskeleton; cell projection; microtubule organizing center; spindle; cytosol; ruffle membrane; secretory granule membrane; ficolin-1-rich granule membrane; mitotic spindle
EEF2	9.89538e-06	-0.130451	0.972	0.982	0.362181	translation; translational elongation; positive regulation of translation; hematopoietic progenitor cell differentiation; response to ischemia; skeletal muscle contraction; aging; glial cell proliferation; response to estradiol; response to endoplasmic reticulum stress; skeletal muscle cell differentiation; response to drug; response to hydrogen peroxide; response to ethanol; response to folic ac…	RNA binding; nucleotide binding; GTPase activity; GTP binding; protein binding; translation elongation factor activity; p53 binding; 5S rRNA binding; ribosome binding; actin filament binding; cadherin binding; protein kinase binding	nucleus; cytoplasm; membrane; cytosol; plasma membrane; aggresome; extracellular region; polysome; polysomal ribosome; membrane raft; synapse; ribonucleoprotein complex; extracellular exosome; secretory granule lumen; ficolin-1-rich granule lumen
AC090204.1	9.94197e-06	0.122654	0.248	0.167	0.363886
PCSK1N	1.00685e-05	-0.102933	0.285	0.4	0.368516	neuropeptide signaling pathway; negative regulation of endopeptidase activity; response to dietary excess; response to cold; peptide hormone processing	endopeptidase inhibitor activity; signaling receptor binding; serine-type endopeptidase inhibitor activity	Golgi apparatus; extracellular region; extracellular space; trans-Golgi network; secretory granule
ITGAE	1.04132e-05	0.171992	0.638	0.573	0.381134	cell adhesion; integrin-mediated signaling pathway; extracellular matrix organization	metal ion binding	membrane; integral component of membrane; integrin complex; plasma membrane; external side of plasma membrane
DNASE2	1.05162e-05	-0.10085	0.152	0.242	0.384904	DNA metabolic process; apoptotic process; multicellular organism development; DNA catabolic process, endonucleolytic; DNA catabolic process; erythrocyte differentiation; regulation of immune response; apoptotic DNA fragmentation	hydrolase activity; endonuclease activity; nuclease activity; endodeoxyribonuclease activity; deoxyribonuclease II activity; DNA binding	lysosome; extracellular exosome
RNMT	1.0605e-05	-0.164002	0.711	0.785	0.388153	mRNA processing; methylation; 7-methylguanosine mRNA capping; RNA 5'-cap (guanine-N7)-methylation; transcription by RNA polymerase II; cellular response to leukemia inhibitory factor	RNA binding; transferase activity; methyltransferase activity; protein binding; mRNA (guanine-N7-)-methyltransferase activity	nucleus; nucleoplasm; fibrillar center; mRNA cap binding complex; receptor complex; mRNA cap methyltransferase complex
IER2	1.07974e-05	-0.22196	0.674	0.745	0.395197	positive regulation of transcription by RNA polymerase II; neuron differentiation; cell motility; response to fibroblast growth factor	DNA binding; DNA-binding transcription activator activity, RNA polymerase II-specific; RNA polymerase II regulatory region sequence-specific DNA binding	nucleus; cytoplasm; nucleoplasm
TMA7	1.11686e-05	0.156113	0.987	0.988	0.408782	cytoplasmic translation
FAM111B	1.12527e-05	-0.2042	0.388	0.489	0.411861		protein binding
OCIAD2	1.1631e-05	-0.126068	0.237	0.337	0.425706	response to bacterium		endosome
PRRT2	1.17353e-05	-0.102118	0.292	0.409	0.429524	neuromuscular process controlling posture; synaptic vesicle fusion to presynaptic active zone membrane; negative regulation of SNARE complex assembly; negative regulation of short-term synaptic potentiation	syntaxin-1 binding	membrane; integral component of membrane; plasma membrane; cell projection; cell junction; cytoplasmic vesicle; synapse; postsynaptic membrane; axon; postsynaptic density; dendritic spine; vesicle; presynaptic membrane; synaptic vesicle membrane; synaptic vesicle; axon terminus; presynapse
ZSCAN16-AS1	1.19442e-05	0.157111	0.558	0.483	0.437168
HIST1H2AL	1.19758e-05	-0.156571	0.116	0.194	0.438328	chromatin organization	DNA binding; protein heterodimerization activity; protein binding; enzyme binding	nucleus; nucleosome; chromosome; nuclear chromatin; extracellular exosome
ENKUR	1.24919e-05	0.111167	0.204	0.128	0.457217		calmodulin binding; SH3 domain binding	motile cilium; cell projection; cilium; acrosomal vesicle; sperm principal piece
ENY2	1.27683e-05	0.135727	0.966	0.963	0.467332	positive regulation of transcription, DNA-templated; mRNA export from nucleus; mRNA transport; protein transport; chromatin organization; transcription elongation from RNA polymerase II promoter; histone deubiquitination; regulation of transcription by RNA polymerase II; poly(A)+ mRNA export from nucleus; negative regulation of insulin secretion involved in cellular response to glucose stimulus	transcription coactivator activity; nuclear receptor transcription coactivator activity; protein binding; chromatin binding	nuclear pore; SAGA complex; nucleus; nucleoplasm; mitochondrion; transcription export complex 2; DUBm complex; nuclear pore nuclear basket
TRIM28	1.30259e-05	-0.128492	0.824	0.881	0.47676	negative regulation of nucleic acid-templated transcription; protein ubiquitination; chromatin organization; DNA repair; innate immune response; Ras protein signal transduction; positive regulation of DNA repair; viral process; positive regulation of protein import into nucleus; protein sumoylation; negative regulation of transcription, DNA-templated; transcription initiation from RNA polymerase …	zinc ion binding; transcription corepressor activity; RNA binding; metal ion binding; transferase activity; DNA binding; protein binding; ubiquitin-protein transferase activity; transcription coactivator activity; chromatin binding; ubiquitin protein ligase binding; SUMO transferase activity; promoter-specific chromatin binding; sequence-specific DNA binding; chromo shadow domain binding; protein…	nucleus; nucleoplasm; RNA polymerase II transcription factor complex; chromatin; nuclear euchromatin; nuclear heterochromatin; intracellular
IGFBPL1	1.32066e-05	0.381122	0.504	0.419	0.483376	regulation of cell growth; cellular response to tumor cell	insulin-like growth factor binding; protein binding	extracellular region; extracellular space
PDLIM5	1.32082e-05	0.127797	0.282	0.199	0.483435	cell growth involved in cardiac muscle cell development; actin cytoskeleton organization; heart development; muscle structure development; cell-cell adhesion; regulation of dendritic spine morphogenesis; regulation of synapse assembly	metal ion binding; actin binding; protein binding; muscle alpha-actinin binding; cadherin binding involved in cell-cell adhesion; protein kinase C binding; actinin binding; protein N-terminus binding	cytoplasm; membrane; cytosol; plasma membrane; cell junction; synapse; postsynaptic membrane; postsynaptic density; filamentous actin; stress fiber; cell-cell adherens junction; Z disc; neuron projection; actin cytoskeleton
MT-ND3	1.32407e-05	0.140124	0.998	0.998	0.484623	oxidation-reduction process; mitochondrial electron transport, NADH to ubiquinone; mitochondrial respiratory chain complex I assembly; response to oxidative stress; response to light intensity; response to hormone; cellular response to glucocorticoid stimulus	protein binding; NADH dehydrogenase (ubiquinone) activity	membrane; integral component of membrane; mitochondrion; respirasome; mitochondrial membrane; mitochondrial respiratory chain complex I; mitochondrial inner membrane
THSD7A	1.34349e-05	0.176318	0.362	0.27	0.49173	cell differentiation; angiogenesis; actin cytoskeleton reorganization		membrane; integral component of membrane; plasma membrane; cell projection; extracellular region
TMEM59L	1.37546e-05	-0.105181	0.235	0.34	0.503431			membrane; integral component of membrane; Golgi apparatus; Golgi membrane
PHGDH	1.4214e-05	-0.128178	0.892	0.936	0.520246	oxidation-reduction process; L-serine biosynthetic process; cellular amino acid biosynthetic process; electron transport chain; brain development; cellular amino acid metabolic process; glutamine metabolic process; glycine metabolic process; L-serine metabolic process; threonine metabolic process; gamma-aminobutyric acid metabolic process; regulation of gene expression; taurine metabolic process;…	oxidoreductase activity; oxidoreductase activity, acting on the CH-OH group of donors, NAD or NADP as acceptor; NAD binding; L-malate dehydrogenase activity; phosphoglycerate dehydrogenase activity; electron transfer activity	cytosol; extracellular exosome
ADNP	1.43441e-05	-0.15682	0.626	0.707	0.525009	regulation of transcription by RNA polymerase II; short-term memory; response to carbohydrate; response to inorganic substance; negative regulation of gene expression; regulation of protein ADP-ribosylation; positive regulation of neuron projection development; cGMP-mediated signaling; cellular response to extracellular stimulus; negative regulation of protein binding; activation of protein kinas…	nucleic acid binding; metal ion binding; DNA binding; protein binding; DNA-binding transcription factor activity, RNA polymerase II-specific; chromatin binding; copper ion binding; peptide binding; beta-tubulin binding	nucleus; nuclear chromatin; extracellular space; cytoplasm; axon; dendrite; neuronal cell body
APBB2	1.48646e-05	0.151449	0.502	0.418	0.54406	regulation of transcription, DNA-templated; cell cycle arrest; negative regulation of cell growth; intracellular signal transduction; neuron migration; axon guidance; extracellular matrix organization; positive regulation of apoptotic process; negative regulation of apoptotic process	protein binding; amyloid-beta binding; transcription factor binding	nucleus; membrane; synapse; cytoplasm; lamellipodium; growth cone
AC113143.3	1.50018e-05	0.10119	0.194	0.12	0.549081
R3HDM2	1.53035e-05	-0.119973	0.365	0.48	0.560123		nucleic acid binding; RNA binding	nucleus
BEX2	1.54106e-05	-0.125329	0.529	0.642	0.564042	cell cycle; apoptotic process; regulation of cell cycle; regulation of apoptotic process	protein binding	nucleus; cytoplasm
TXNDC17	1.54711e-05	0.192282	0.812	0.787	0.566259	oxidation-reduction process; cellular oxidant detoxification; tumor necrosis factor-mediated signaling pathway	protein binding; peroxidase activity; protein-disulfide reductase activity	cytoplasm; cytosol; extracellular exosome
PBX1	1.54902e-05	0.172037	0.808	0.775	0.566958	regulation of transcription, DNA-templated; steroid biosynthetic process; multicellular organism development; cell differentiation; urogenital system development; branching involved in ureteric bud morphogenesis; positive regulation of cell population proliferation; animal organ morphogenesis; anterior/posterior pattern specification; proximal/distal pattern formation; positive regulation of G2/M…	DNA-binding transcription factor activity; DNA binding; sequence-specific DNA binding; protein binding; RNA polymerase II proximal promoter sequence-specific DNA binding; DNA-binding transcription activator activity, RNA polymerase II-specific; protein heterodimerization activity; DNA-binding transcription factor activity, RNA polymerase II-specific; RNA polymerase II regulatory region sequence-s…	nucleus; nucleoplasm; cytoplasm; transcription factor complex; nuclear chromatin; RNA polymerase II transcription factor complex
TUBB2B	1.55957e-05	0.160147	0.998	0.999	0.570819	cytoskeleton organization; microtubule-based process; nervous system development; microtubule cytoskeleton organization; mitotic cell cycle; neuron migration; modulation of chemical synaptic transmission; embryonic brain development; positive regulation of axon guidance	nucleotide binding; GTPase activity; GTP binding; protein binding; structural constituent of cytoskeleton; protein heterodimerization activity	nucleus; cytoplasm; cytoskeleton; microtubule; Schaffer collateral - CA1 synapse; microtubule cytoskeleton
FAM219A	1.56992e-05	-0.135915	0.238	0.332	0.574607
GLUL	1.61026e-05	0.22513	0.804	0.745	0.58937	nitrogen compound metabolic process; glutamine biosynthetic process; ribosome biogenesis; cell population proliferation; angiogenesis; regulation of protein localization to nucleolus; cellular amino acid biosynthetic process; glutamate catabolic process; regulation of endothelial cell migration; regulation of sprouting angiogenesis; neurotransmitter uptake; protein palmitoylation; glutamate metab…	nucleotide binding; ATP binding; catalytic activity; ligase activity; glutamate-ammonia ligase activity; metal ion binding; transferase activity; protein-cysteine S-palmitoyltransferase activity; protein binding; identical protein binding; magnesium ion binding; glutamate binding; manganese ion binding; dynein light chain binding	nucleus; cytoplasm; membrane; cytosol; endoplasmic reticulum; intracellular membrane-bounded organelle; mitochondrion; plasma membrane; extracellular exosome; rough endoplasmic reticulum; protein-containing complex; cell projection; neuron projection; perikaryon; myelin sheath; axon terminus; cell body; glial cell projection
PSAT1	1.61282e-05	0.174165	0.804	0.76	0.590308	L-serine biosynthetic process; cellular amino acid biosynthetic process; pyridoxine biosynthetic process	transferase activity; catalytic activity; O-phospho-L-serine:2-oxoglutarate aminotransferase activity; transaminase activity	cytosol; extracellular exosome
ITM2C	1.61878e-05	0.214395	0.594	0.524	0.592489	positive regulation of extrinsic apoptotic signaling pathway; neuron differentiation; negative regulation of neuron projection development; negative regulation of amyloid precursor protein biosynthetic process	ATP binding; protein binding; amyloid-beta binding	membrane; integral component of membrane; lysosomal membrane; plasma membrane; perinuclear region of cytoplasm; lysosome; Golgi apparatus; extracellular exosome
MCM7	1.66741e-05	-0.150504	0.728	0.79	0.61029	DNA replication initiation; cellular response to DNA damage stimulus; cell cycle; DNA replication; G1/S transition of mitotic cell cycle; double-strand break repair via break-induced replication; regulation of phosphorylation; DNA unwinding involved in DNA replication; pre-replicative complex assembly involved in nuclear cell cycle DNA replication; DNA strand elongation involved in DNA replicatio…	nucleotide binding; ATP binding; hydrolase activity; DNA binding; protein binding; DNA helicase activity; helicase activity; single-stranded DNA binding; DNA replication origin binding; single-stranded 3'-5' DNA helicase activity	nucleus; membrane; cytosol; nucleoplasm; MCM complex; nuclear chromosome, telomeric region; chromatin
MGST3	1.73551e-05	0.477553	0.927	0.942	0.635214	oxidation-reduction process; response to organonitrogen compound; cellular oxidant detoxification; xenobiotic metabolic process; lipid metabolic process; leukotriene biosynthetic process; glutathione derivative biosynthetic process	transferase activity; oxidoreductase activity; lyase activity; protein binding; glutathione peroxidase activity; glutathione transferase activity; leukotriene-C4 synthase activity	membrane; integral component of membrane; endoplasmic reticulum; endoplasmic reticulum membrane; organelle membrane; intracellular membrane-bounded organelle; nuclear envelope
MFAP2	1.75365e-05	-0.132485	0.29	0.385	0.641853	extracellular matrix organization; positive regulation of cold-induced thermogenesis; embryonic eye morphogenesis; post-embryonic eye morphogenesis	extracellular matrix structural constituent	extracellular region; microfibril; collagen-containing extracellular matrix
ASAP1	1.78122e-05	0.201906	0.571	0.493	0.651945	positive regulation of GTPase activity; cilium assembly; cell projection organization; positive regulation of membrane tubulation; negative regulation of dendritic spine development; positive regulation of podosome assembly	GTPase activator activity; protein binding; metal ion binding; cadherin binding; phosphatidylserine binding; phosphatidylinositol-4,5-bisphosphate binding; phosphatidylinositol-3,4,5-trisphosphate binding	cytoplasm; membrane; cytosol; cell projection membrane; podosome; dendritic spine
PRR11	1.81926e-05	0.155547	0.679	0.581	0.665867	regulation of cell cycle; cell cycle arrest		nucleus; cytoplasm; membrane
IQGAP2	1.91136e-05	-0.164166	0.594	0.705	0.699575	signal transduction; regulation of GTPase activity; Arp2/3 complex-mediated actin nucleation; neutrophil degranulation; negative regulation of GTPase activity; thrombin-activated receptor signaling pathway	calmodulin binding; actin filament binding; phosphatidylinositol-3,4,5-trisphosphate binding; Rho GTPase binding; GTPase inhibitor activity; actin binding; Rac GTPase binding; Arp2/3 complex binding; protein binding	cytoplasm; cell surface; plasma membrane; cytosol; lamellipodium; filopodium; extracellular exosome; secretory granule membrane; actin cytoskeleton; microvillus
AHCY	1.95274e-05	0.160031	0.669	0.594	0.714721	one-carbon metabolic process; response to hypoxia; chronic inflammatory response to antigenic stimulus; response to nutrient; S-adenosylhomocysteine catabolic process; circadian sleep/wake cycle; S-adenosylmethionine cycle; methylation; sulfur amino acid metabolic process	hydrolase activity; adenosylhomocysteinase activity; protein binding; adenyl nucleotide binding; identical protein binding; NAD binding	cytoplasm; cytosol; melanosome; nucleus; neuron projection; extracellular exosome
DYNC2H1	2.03476e-05	0.137898	0.409	0.318	0.744743	multicellular organism development; microtubule-based movement; intraciliary transport involved in cilium assembly; cell projection organization; cilium assembly; Golgi organization; intraciliary retrograde transport; determination of left/right symmetry; heart development; dorsal/ventral pattern formation; protein processing; spinal cord motor neuron differentiation; neuron differentiation; embr…	nucleotide binding; ATP binding; motor activity; microtubule motor activity; dynein light intermediate chain binding; dynein intermediate chain binding; ATP-dependent microtubule motor activity, minus-end-directed	cytoplasm; membrane; Golgi apparatus; plasma membrane; cytoskeleton; cell projection; microtubule; dynein complex; cilium; ciliary tip; extracellular exosome; motile cilium; cytoplasmic dynein complex; axoneme; apical part of cell
MCMBP	2.03718e-05	-0.146467	0.377	0.47	0.745628	cell division; cell cycle; DNA replication; DNA-dependent DNA replication; sister chromatid cohesion	protein binding; chromatin binding	nucleus; cytosol; nucleoplasm; plasma membrane; nuclear chromatin; MCM complex
ABHD3	2.03868e-05	-0.123199	0.215	0.309	0.746177	lipid metabolic process; phosphatidylcholine metabolic process; cellular lipid metabolic process; phosphatidylcholine biosynthetic process	hydrolase activity; phospholipase A2 activity; phospholipase A2 activity (consuming 1,2-dipalmitoylphosphatidylcholine); phospholipase A2 activity consuming 1,2-dioleoylphosphatidylethanolamine); carboxylic ester hydrolase activity; lipase activity; acylglycerol lipase activity; phospholipase A1 activity; phosphatidylserine 1-acylhydrolase activity; 1-acyl-2-lysophosphatidylserine acylhydrolase a…	membrane; integral component of membrane; plasma membrane
MT-CO3	2.04585e-05	0.123665	1	0.999	0.748803	proton transmembrane transport; transmembrane transport; respiratory electron transport chain; aerobic respiration; mitochondrial electron transport, cytochrome c to oxygen; respiratory chain complex IV assembly; aerobic electron transport chain	protein binding; cytochrome-c oxidase activity; electron transfer activity; heme-copper terminal oxidase activity; oxidoreduction-driven active transmembrane transporter activity	membrane; integral component of membrane; mitochondrial inner membrane; mitochondrion; respiratory chain complex IV
PPA2	2.12425e-05	0.15066	0.506	0.411	0.777498	protein dephosphorylation; phosphate-containing compound metabolic process; tRNA aminoacylation for protein translation; regulation of mitochondrial membrane potential; diphosphate metabolic process	metal ion binding; magnesium ion binding; hydrolase activity; inorganic diphosphatase activity; protein serine/threonine phosphatase activity	cytoplasm; mitochondrion; mitochondrial matrix
RPL18A	2.13438e-05	-0.110104	1	1	0.781205	translation; cytoplasmic translation; viral transcription; translational initiation; nuclear-transcribed mRNA catabolic process, nonsense-mediated decay; SRP-dependent cotranslational protein targeting to membrane	RNA binding; structural constituent of ribosome; protein binding	membrane; ribosome; cytosolic large ribosomal subunit; cytosol; polysomal ribosome
CMBL	2.13584e-05	-0.159771	0.316	0.409	0.781738	xenobiotic metabolic process	hydrolase activity	cytoplasm; cytosol; extracellular exosome
BPHL	2.16209e-05	0.13866	0.416	0.322	0.791347	xenobiotic metabolic process; cellular amino acid metabolic process; response to toxic substance	hydrolase activity; alpha-amino-acid esterase activity	mitochondrion; mitochondrial outer membrane
COTL1	2.16273e-05	0.185226	0.432	0.351	0.791582	defense response to fungus; neutrophil degranulation; regulation of actin filament polymerization	actin binding; protein binding; actin filament binding; enzyme binding	nucleus; cytoplasm; cytoskeleton; extracellular region; plasma membrane; extracellular exosome; cortical actin cytoskeleton; actin filament; secretory granule lumen; ficolin-1-rich granule lumen; site of polarized growth; intracellular
ABCC4	2.16692e-05	-0.101246	0.142	0.224	0.793115	transmembrane transport; ion transmembrane transport; oxidation-reduction process; platelet degranulation; cilium assembly; response to organic substance; response to organonitrogen compound; response to organic cyclic compound; prostaglandin secretion; response to drug; positive regulation of smooth muscle cell proliferation; export across plasma membrane	nucleotide binding; ATP binding; protein binding; ATPase activity; ATPase-coupled transmembrane transporter activity; efflux transmembrane transporter activity; ion transmembrane transporter activity, phosphorylative mechanism; 15-hydroxyprostaglandin dehydrogenase (NAD+) activity; xenobiotic transmembrane transporter activity	membrane; integral component of membrane; plasma membrane; platelet dense granule membrane; cell surface; basolateral plasma membrane; apical plasma membrane; external side of apical plasma membrane
MYL12A	2.18447e-05	0.131894	0.408	0.321	0.799539	platelet aggregation; muscle contraction; regulation of cell shape; protein localization to plasma membrane	metal ion binding; calcium ion binding; protein binding; glutamate receptor binding	myosin complex; cytosol; extracellular exosome; stress fiber; myosin II complex; Z disc
FXYD6	2.19591e-05	-0.136603	0.799	0.858	0.803725	ion transport; regulation of ion transport; regulation of sodium ion transmembrane transporter activity; ion transmembrane transport; regulation of cardiac conduction	protein binding; ion channel regulator activity; sodium channel regulator activity	membrane; integral component of membrane; plasma membrane; glutamatergic synapse; integral component of postsynaptic membrane; integral component of presynaptic membrane
ARGLU1	2.21879e-05	-0.137532	0.899	0.921	0.812099		protein binding; cadherin binding	nucleus; nucleoplasm; mitochondrion
CCDC34	2.22443e-05	0.197667	0.847	0.837	0.814163
ATP5F1E	2.23931e-05	0.117001	0.992	0.996	0.81961	ion transport; ATP synthesis coupled proton transport; ATP biosynthetic process; cristae formation; mitochondrial ATP synthesis coupled proton transport	hydrolase activity; protein binding; proton-transporting ATP synthase activity, rotational mechanism; ATPase activity; transmembrane transporter activity	membrane; mitochondrial inner membrane; mitochondrion; mitochondrial matrix; proton-transporting ATP synthase complex, catalytic core F(1); mitochondrial proton-transporting ATP synthase complex; mitochondrial proton-transporting ATP synthase complex, catalytic core F(1)
TCIM	2.25552e-05	-0.156154	0.359	0.465	0.825544	apoptotic process; positive regulation of NIK/NF-kappaB signaling; negative regulation of Notch signaling pathway; cellular response to heat; regulation of DNA-templated transcription in response to stress; negative regulation of apoptotic process; endothelial cell activation involved in immune response; positive regulation of protein kinase A signaling; positive regulation of protein kinase C ac…	Notch binding; protein binding	nucleus; cytoplasm; nuclear speck; cytosol; nucleoplasm; plasma membrane; nucleolus
CKB	2.26456e-05	0.117853	1	1	0.828853	phosphorylation; phosphocreatine biosynthetic process; substantia nigra development; creatine metabolic process; brain development; cerebellum development; cellular chloride ion homeostasis	nucleotide binding; ATP binding; kinase activity; transferase activity; catalytic activity; transferase activity, transferring phosphorus-containing groups; protein binding; creatine kinase activity; ubiquitin protein ligase binding	cytoplasm; cytosol; extracellular space; extracellular exosome; nucleus; dendrite; neuronal cell body
MAGED2	2.26595e-05	-0.158326	0.886	0.907	0.829359	renal sodium ion absorption; female pregnancy; platelet degranulation	protein binding	membrane; nucleus; nucleolus; cytosol; extracellular region; platelet alpha granule lumen
ZFHX4	2.31259e-05	-0.179857	0.739	0.806	0.846433	regulation of transcription, DNA-templated; negative regulation of transcription by RNA polymerase II; positive regulation of transcription, DNA-templated	nucleic acid binding; zinc ion binding; metal ion binding; DNA binding; sequence-specific DNA binding; RNA polymerase II proximal promoter sequence-specific DNA binding; DNA-binding transcription factor activity, RNA polymerase II-specific; transcription regulatory region DNA binding	nucleus; nuclear chromatin
TCF7L1	2.31466e-05	-0.109075	0.297	0.404	0.84719	canonical Wnt signaling pathway; regulation of transcription by RNA polymerase II; chromatin organization; Wnt signaling pathway; regulation of transcription, DNA-templated; beta-catenin-TCF complex assembly; regulation of Wnt signaling pathway	beta-catenin binding; DNA binding; DNA-binding transcription factor activity; sequence-specific DNA binding; DNA-binding transcription factor activity, RNA polymerase II-specific; transcription regulatory region DNA binding; chromatin binding	nucleus; cytosol; nucleoplasm; transcription factor complex
TGFBR1	2.36485e-05	0.13694	0.463	0.38	0.86556	transmembrane receptor protein serine/threonine kinase signaling pathway; protein phosphorylation; positive regulation of gene expression; transforming growth factor beta receptor signaling pathway; positive regulation of epithelial to mesenchymal transition; positive regulation of protein kinase B signaling; positive regulation of cell migration; ventricular septum morphogenesis; positive regula…	ATP binding; transmembrane receptor protein serine/threonine kinase activity; metal ion binding; nucleotide binding; protein kinase activity; protein serine/threonine kinase activity; kinase activity; transferase activity; protein binding; transforming growth factor beta receptor activity, type I; transforming growth factor beta binding; SMAD binding; I-SMAD binding; activin binding; type II tran…	membrane; integral component of membrane; intracellular membrane-bounded organelle; plasma membrane; nucleus; cell; cell junction; membrane raft; cell surface; endosome; receptor complex; bicellular tight junction; activin receptor complex
NUFIP1	2.37175e-05	-0.126093	0.351	0.456	0.868086	positive regulation of transcription by RNA polymerase II; protein complex oligomerization; RNA processing; box C/D snoRNP assembly	nucleic acid binding; RNA binding; metal ion binding; DNA binding; protein binding; snoRNA binding; identical protein binding; protein binding, bridging; ATPase binding	nucleus; nucleolus; fibrillar center; pre-snoRNP complex; protein-containing complex; transcription elongation factor complex; cytosolic ribosome; perichromatin fibrils; nuclear matrix; synapse; presynaptic active zone
TBCB	2.37321e-05	0.151981	0.904	0.902	0.868618	multicellular organism development; cell differentiation; nervous system development	protein binding	cytoplasm; cytosol; cytoskeleton; microtubule; microtubule cytoskeleton
CFAP36	2.42077e-05	0.166262	0.662	0.619	0.886027		protein binding; protein N-terminus binding	nucleus; cytoplasm; motile cilium; cell projection; cilium; ciliary transition zone; ciliary base
IGFBP4	2.42098e-05	-0.108204	0.162	0.247	0.886103	regulation of cell growth; inflammatory response; regulation of glucose metabolic process; regulation of growth; positive regulation of MAPK cascade; positive regulation of insulin-like growth factor receptor signaling pathway; type B pancreatic cell proliferation; cellular protein metabolic process; post-translational protein modification; signal transduction; negative regulation of canonical Wn…	protein binding; insulin-like growth factor binding; growth factor binding; signaling receptor binding; insulin-like growth factor I binding; insulin-like growth factor II binding	extracellular region; extracellular space; endoplasmic reticulum lumen
TSEN34	2.4556e-05	-0.13554	0.677	0.769	0.898773	RNA phosphodiester bond hydrolysis; RNA phosphodiester bond hydrolysis, endonucleolytic; tRNA-type intron splice site recognition and cleavage; nucleic acid phosphodiester bond hydrolysis; tRNA splicing, via endonucleolytic cleavage and ligation; mRNA processing; tRNA processing	tRNA-intron endonuclease activity; nucleic acid binding; nuclease activity; lyase activity; endonuclease activity	nucleus; tRNA-intron endonuclease complex; nucleolus; nucleoplasm
IDI1	2.58997e-05	-0.20785	0.835	0.89	0.947956	lipid metabolic process; steroid biosynthetic process; steroid metabolic process; isoprenoid biosynthetic process; sterol biosynthetic process; cholesterol metabolic process; cholesterol biosynthetic process; regulation of cholesterol biosynthetic process; isopentenyl diphosphate biosynthetic process; dimethylallyl diphosphate biosynthetic process	metal ion binding; isomerase activity; hydrolase activity; isopentenyl-diphosphate delta-isomerase activity	peroxisome; cytosol
CEMIP2	2.59177e-05	0.12585	0.233	0.157	0.948615	metabolic process; multicellular organism development; angiogenesis; hyaluronan catabolic process; regulation of sprouting angiogenesis	hydrolase activity; hydrolase activity, acting on glycosyl bonds; hyalurononglucosaminidase activity; calcium ion binding; cadherin binding	membrane; integral component of membrane; plasma membrane; integral component of plasma membrane; extracellular exosome
GOPC	2.73152e-05	-0.172385	0.592	0.682	0.999763	protein transport; Golgi to plasma membrane transport; cytoplasmic sequestering of CFTR protein; endoplasmic reticulum to Golgi vesicle-mediated transport; negative regulation of anion channel activity; protein homooligomerization; negative regulation of protein localization to cell surface; apical protein localization	protein binding; ion channel binding	cytoplasm; membrane; Golgi apparatus; plasma membrane; cell projection; Golgi membrane; cell junction; synapse; postsynaptic membrane; dendrite; postsynaptic density; protein-containing complex; trans-Golgi network transport vesicle; lysosomal membrane; Golgi-associated vesicle membrane
HSBP1	2.75582e-05	0.12436	0.982	0.977	1	regulation of cellular response to heat; cellular heat acclimation; negative regulation of transcription by RNA polymerase II; muscle contraction; endodermal cell differentiation	transcription corepressor activity; protein binding; identical protein binding	nucleus; cytoplasm; cytosol; nucleoplasm; cytoskeleton
SH3BGRL	2.77034e-05	0.145534	0.811	0.758	1	positive regulation of signal transduction	SH3 domain binding; SH3/SH2 adaptor activity	nucleus; cytoplasm; extracellular space; extracellular exosome
SET	2.77713e-05	0.123232	1	0.996	1	nucleosome assembly; negative regulation of phosphoprotein phosphatase activity; regulation of phosphoprotein phosphatase activity; regulation of mRNA stability; viral process; negative regulation of transcription, DNA-templated; DNA replication; nucleosome disassembly; negative regulation of neuron apoptotic process; negative regulation of histone acetylation	DNA binding; protein binding; protein phosphatase regulator activity; histone binding; protein phosphatase inhibitor activity	nucleus; cytoplasm; nucleoplasm; endoplasmic reticulum; cytosol; lipid droplet; perinuclear region of cytoplasm; protein-containing complex
HIST2H2BF	2.79194e-05	-0.114968	0.219	0.314	1	nucleosome assembly	DNA binding; protein heterodimerization activity	nucleus; cytosol; nucleoplasm; nucleosome; chromosome; extracellular exosome
ATP1B3	2.8164e-05	0.138524	0.881	0.871	1	potassium ion transport; sodium ion transport; protein stabilization; ion transport; leukocyte migration; establishment or maintenance of transmembrane electrochemical gradient; potassium ion import across plasma membrane; ion transmembrane transport; positive regulation of sodium ion export across plasma membrane; regulation of cardiac conduction; cellular sodium ion homeostasis; cellular potass…	ATPase binding; sodium:potassium-exchanging ATPase activity; ATPase activator activity	plasma membrane; sodium:potassium-exchanging ATPase complex; membrane; integral component of membrane; melanosome; extracellular exosome; cytoplasm; caveola
IFT88	2.89634e-05	0.152114	0.411	0.332	1	intraciliary transport involved in cilium assembly; cilium assembly; cell projection organization; regulation of cilium assembly; kidney development; intraciliary transport; non-motile cilium assembly; inner ear receptor cell stereocilium organization; regulation of autophagosome assembly	protein binding; kinesin binding	cytoplasm; motile cilium; cytoskeleton; cell projection; centrosome; microtubule organizing center; cilium; ciliary basal body; ciliary base; intraciliary transport particle B; ciliary tip; centriole; non-motile cilium; sperm flagellum
SLBP	2.92086e-05	-0.133096	0.527	0.623	1	mRNA processing; mRNA transport; mRNA export from nucleus; termination of RNA polymerase II transcription; histone mRNA metabolic process; mRNA 3'-end processing by stem-loop binding and cleavage	RNA binding; mRNA binding; protein binding; identical protein binding; histone pre-mRNA DCP binding; histone pre-mRNA stem-loop binding	nucleus; cytoplasm; nucleolus; cytosol; nucleoplasm; histone pre-mRNA 3'end processing complex; ribonucleoprotein complex
SLC39A6	2.98414e-05	-0.150037	0.631	0.728	1	transmembrane transport; ion transport; metal ion transport; zinc ion transport; zinc ion transmembrane transport; cellular zinc ion homeostasis; zinc ion import across plasma membrane	metal ion transmembrane transporter activity; zinc ion transmembrane transporter activity	membrane; integral component of membrane; plasma membrane; cell surface; integral component of plasma membrane; lamellipodium membrane; endoplasmic reticulum
UACA	3.00495e-05	0.167454	0.476	0.386	1	apoptotic signaling pathway; regulation of NIK/NF-kappaB signaling	protein binding	nucleus; cytoplasm; cytosol; cytoskeleton; extracellular region; extracellular exosome
ITGB1BP1	3.05627e-05	-0.166201	0.711	0.783	1	cell adhesion; Notch signaling pathway; cell differentiation; integrin-mediated signaling pathway; positive regulation of transcription by RNA polymerase II; biomineral tissue development; negative regulation of cell population proliferation; positive regulation of cell division; positive regulation of protein targeting to membrane; angiogenesis; positive regulation of cell population proliferati…	protein binding; integrin binding; GDP-dissociation inhibitor activity; kinase binding; protein kinase binding	nucleus; cytoplasm; membrane; cytosol; nucleoplasm; plasma membrane; cytoskeleton; cell projection; nuclear body; perinuclear region of cytoplasm; microtubule organizing center; lamellipodium; cell periphery; ruffle
FOSB	3.06617e-05	-0.18765	0.113	0.188	1	regulation of transcription, DNA-templated; regulation of transcription by RNA polymerase II; negative regulation of transcription by RNA polymerase II; transcription by RNA polymerase II; female pregnancy; response to mechanical stimulus; response to progesterone; cellular response to hormone stimulus; response to drug; response to morphine; positive regulation of transcription by RNA polymerase…	DNA binding; DNA-binding transcription factor activity; protein binding; RNA polymerase II proximal promoter sequence-specific DNA binding; DNA-binding transcription factor activity, RNA polymerase II-specific; transcription factor binding; DNA-binding transcription activator activity, RNA polymerase II-specific; double-stranded DNA binding; sequence-specific DNA binding	nucleus; intracellular membrane-bounded organelle; nucleoplasm; nuclear chromatin
ZCCHC3	3.1871e-05	-0.112354	0.382	0.475	1	immune system process; innate immune response; defense response to virus; activation of innate immune response; detection of virus; cellular response to exogenous dsRNA; positive regulation of RIG-I signaling pathway; positive regulation of type I interferon production	nucleic acid binding; RNA binding; zinc ion binding; metal ion binding; DNA binding; double-stranded DNA binding; protein binding	cytoplasm
TLE3	3.21905e-05	-0.113842	0.232	0.327	1	regulation of transcription, DNA-templated; Wnt signaling pathway; negative regulation of nucleic acid-templated transcription; negative regulation of canonical Wnt signaling pathway; signal transduction; negative regulation of cold-induced thermogenesis; beta-catenin-TCF complex assembly; animal organ morphogenesis	protein binding; transcription corepressor activity; repressing transcription factor binding	nucleus; nucleoplasm; transcription factor complex; beta-catenin-TCF complex
GCAT	3.24933e-05	-0.112344	0.277	0.372	1	biosynthetic process; cellular amino acid metabolic process; threonine catabolic process; L-threonine catabolic process to glycine	transferase activity; catalytic activity; transferase activity, transferring acyl groups; pyridoxal phosphate binding; glycine C-acetyltransferase activity	nucleus; nuclear speck; nucleoplasm; mitochondrion; mitochondrial inner membrane
HNRNPAB	3.26833e-05	-0.137207	0.91	0.929	1	positive regulation of transcription, DNA-templated; epithelial to mesenchymal transition	nucleic acid binding; RNA binding; protein binding; sequence-specific DNA binding; DNA-binding transcription factor activity; sequence-specific double-stranded DNA binding; mRNA binding	nucleus; cytoplasm; nucleoplasm; ribonucleoprotein complex; RNA polymerase II transcription factor complex
AK3	3.27831e-05	0.15787	0.468	0.387	1	phosphorylation; nucleobase-containing compound metabolic process; ADP biosynthetic process; AMP metabolic process; nucleoside monophosphate phosphorylation; GTP metabolic process; blood coagulation; ITP metabolic process; UTP metabolic process	nucleotide binding; ATP binding; kinase activity; transferase activity; GTP binding; protein binding; nucleobase-containing compound kinase activity; phosphotransferase activity, phosphate group as acceptor; nucleoside triphosphate adenylate kinase activity; adenylate kinase activity	mitochondrion; mitochondrial matrix
DLL3	3.28423e-05	0.268429	0.194	0.127	1	multicellular organism development; Notch signaling pathway; cell differentiation; skeletal system development; negative regulation of Notch signaling pathway; somitogenesis; compartment pattern specification; tissue development; paraxial mesoderm development; negative regulation of neurogenesis	calcium ion binding; Notch binding	integral component of membrane; membrane; plasma membrane
EMX2OS	3.29234e-05	-0.10375	0.276	0.375	1
ZFP36L1	3.31693e-05	-0.182953	0.747	0.808	1	mRNA processing; mRNA transport; multicellular organism development; regulation of transcription, DNA-templated; MAPK cascade; nuclear-transcribed mRNA catabolic process, deadenylation-dependent decay; vasculogenesis; proepicardium development; mRNA catabolic process; regulation of translation; apoptotic process; heart development; cell population proliferation; neural tube development; nuclear-t…	RNA binding; metal ion binding; DNA binding; protein binding; mRNA binding; AU-rich element binding; mRNA 3'-UTR AU-rich region binding; DNA-binding transcription factor activity, RNA polymerase II-specific; DNA-binding transcription factor activity; 14-3-3 protein binding	nucleus; cytoplasm; cytosol; ribonucleoprotein complex; P-body
FZD2	3.34795e-05	-0.13393	0.605	0.705	1	positive regulation of DNA-binding transcription factor activity; positive regulation of transcription, DNA-templated; signal transduction; cell surface receptor signaling pathway; G protein-coupled receptor signaling pathway; multicellular organism development; Wnt signaling pathway; canonical Wnt signaling pathway; Wnt signaling pathway, planar cell polarity pathway; non-canonical Wnt signaling…	protein binding; transmembrane signaling receptor activity; G protein-coupled receptor activity; Wnt-activated receptor activity; Wnt-protein binding; PDZ domain binding	cytoplasm; membrane; integral component of membrane; plasma membrane; focal adhesion; clathrin-coated endocytic vesicle membrane
PCNX4	3.36838e-05	0.160949	0.654	0.585	1		protein binding	membrane; integral component of membrane
HNRNPA1	3.48103e-05	0.111113	1	0.999	1	mRNA processing; RNA splicing; mRNA transport; mRNA splicing, via spliceosome; viral process; positive regulation of telomere maintenance via telomerase; cellular response to sodium arsenite; fibroblast growth factor receptor signaling pathway; RNA metabolic process; negative regulation of telomere maintenance via telomerase; regulation of alternative mRNA splicing, via spliceosome; RNA export fr…	nucleic acid binding; RNA binding; protein binding; mRNA binding; protein domain specific binding; telomeric repeat-containing RNA binding; single-stranded DNA binding; single-stranded RNA binding; miRNA binding; pre-mRNA binding; G-rich strand telomeric DNA binding	nucleus; cytoplasm; membrane; nucleoplasm; spliceosomal complex; catalytic step 2 spliceosome; extracellular exosome; ribonucleoprotein complex
CD81	3.49672e-05	-0.134849	0.883	0.935	1	positive regulation of transcription by RNA polymerase II; immune system process; positive regulation of inflammatory response to antigenic stimulus; myoblast fusion involved in skeletal muscle regeneration; receptor internalization; macrophage fusion; positive regulation of B cell receptor signaling pathway; positive regulation of B cell activation; cellular response to low-density lipoprotein p…	protein binding; lipid binding; integrin binding; virus receptor activity; cholesterol binding; MHC class II protein binding; MHC class II protein complex binding; transferrin receptor binding	membrane; integral component of membrane; plasma membrane; focal adhesion; integral component of plasma membrane; extracellular exosome; basolateral plasma membrane; vesicle; tetraspanin-enriched microdomain; immunological synapse
PEG10	3.51751e-05	0.339111	0.912	0.909	1	apoptotic process; cell differentiation; negative regulation of transforming growth factor beta receptor signaling pathway; placenta development	nucleic acid binding; RNA binding; zinc ion binding; metal ion binding; DNA binding; protein binding	nucleus; cytoplasm; cytosol
SPIRE1	3.59017e-05	-0.154228	0.382	0.479	1	protein transport; vesicle-mediated transport; actin nucleation; actin cytoskeleton organization; intracellular transport; cleavage furrow formation; positive regulation of double-strand break repair; polar body extrusion after meiotic divisions; establishment of meiotic spindle localization; formin-nucleated actin cable assembly	actin binding	cytoplasm; membrane; cytosol; nucleoplasm; plasma membrane; cytoskeleton; perinuclear region of cytoplasm; cytoplasmic vesicle; cytoplasmic vesicle membrane; cell cortex; cleavage furrow
BSG	3.644e-05	0.135069	0.897	0.901	1	leukocyte migration; axon guidance; cell surface receptor signaling pathway; pyruvate metabolic process; extracellular matrix organization; extracellular matrix disassembly; protein localization to plasma membrane; homophilic cell adhesion via plasma membrane adhesion molecules; dendrite self-avoidance; embryo implantation; odontogenesis of dentin-containing tooth; response to peptide hormone; re…	carbohydrate binding; protein binding; cadherin binding; cell-cell adhesion mediator activity; mannose binding	membrane; integral component of membrane; intracellular membrane-bounded organelle; mitochondrion; plasma membrane; melanosome; focal adhesion; integral component of plasma membrane; extracellular exosome; axon; Golgi membrane; acrosomal membrane; sarcolemma; membrane raft
PREX2	3.66177e-05	0.136598	0.369	0.281	1	intracellular signal transduction; regulation of Rho protein signal transduction; positive regulation of GTPase activity; G protein-coupled receptor signaling pathway; adult locomotory behavior; phosphatidylinositol 3-kinase signaling; dendrite morphogenesis	guanyl-nucleotide exchange factor activity; Rho guanyl-nucleotide exchange factor activity; Rac guanyl-nucleotide exchange factor activity; GTPase activator activity; protein binding	plasma membrane; cytosol
MTRNR2L12	3.70036e-05	0.192193	0.796	0.763	1	negative regulation of signaling receptor activity; negative regulation of execution phase of apoptosis	receptor antagonist activity	cytoplasm; extracellular region
PNMA2	3.78889e-05	0.166313	0.574	0.5	1	positive regulation of apoptotic process	protein binding	nucleus; nucleolus
GPM6B	3.89321e-05	0.262142	0.863	0.864	1	protein transport; multicellular organism development; cell differentiation; nervous system development; regulation of actin cytoskeleton organization; neuron projection development; ossification; positive regulation of bone mineralization; extracellular matrix assembly; negative regulation of protein localization to cell surface; regulation of focal adhesion assembly; negative regulation of sero…		membrane; integral component of membrane; plasma membrane; membrane raft
KLHL23	3.90108e-05	-0.128445	0.791	0.85	1		protein binding
CTDSPL2	3.97572e-05	-0.123359	0.574	0.675	1	protein dephosphorylation; negative regulation of BMP signaling pathway; positive regulation of protein export from nucleus	hydrolase activity; phosphoprotein phosphatase activity; protein binding; phosphatase activity	nucleoplasm; nucleus
NOTCH3	3.98922e-05	-0.105518	0.269	0.367	1	regulation of transcription, DNA-templated; multicellular organism development; cell differentiation; Notch signaling pathway; regulation of developmental process; transcription initiation from RNA polymerase II promoter; negative regulation of Notch signaling pathway; positive regulation of transcription of Notch receptor target; negative regulation of transcription by RNA polymerase II; forebra…	calcium ion binding; protein binding; signaling receptor activity; identical protein binding; cadherin binding; enzyme binding	nucleus; membrane; integral component of membrane; cytosol; nucleoplasm; plasma membrane; actin cytoskeleton; extracellular region; cell surface; receptor complex; endoplasmic reticulum membrane; Golgi membrane
SLIRP	4.03821e-05	-0.123143	0.918	0.944	1	mitochondrion morphogenesis; negative regulation of mitochondrial RNA catabolic process; spermatid development; single fertilization; flagellated sperm motility	nucleic acid binding; RNA binding; protein binding	nucleus; mitochondrion; ribonucleoprotein complex; acrosomal vesicle; cytoplasm; sperm flagellum; perinuclear region of cytoplasm
TIMM17B	4.15072e-05	-0.12493	0.522	0.619	1	intracellular protein transport; protein transport; protein targeting to mitochondrion; protein import into mitochondrial matrix	P-P-bond-hydrolysis-driven protein transmembrane transporter activity; protein binding; protein transmembrane transporter activity	membrane; integral component of membrane; mitochondrial inner membrane; mitochondrion; TIM23 mitochondrial import inner membrane translocase complex; integral component of mitochondrial inner membrane
TRMT6	4.25061e-05	-0.115743	0.233	0.325	1	tRNA processing; tRNA methylation; tRNA modification; mRNA methylation	RNA binding; protein binding; tRNA (adenine-N1-)-methyltransferase activity	nucleus; tRNA (m1A) methyltransferase complex; nucleoplasm
IL6ST	4.32203e-05	0.163419	0.4	0.319	1	positive regulation of cell population proliferation; positive regulation of tyrosine phosphorylation of STAT protein; negative regulation of apoptotic process; positive regulation of cardiac muscle hypertrophy; positive regulation of acute inflammatory response; positive regulation of osteoblast differentiation; viral process; cytokine-mediated signaling pathway; interleukin-6-mediated signaling…	protein binding; cytokine receptor activity; identical protein binding; protein homodimerization activity; growth factor binding; ciliary neurotrophic factor receptor binding; cytokine binding; interleukin-6 receptor binding; ciliary neurotrophic factor receptor activity; interleukin-6 receptor activity; interleukin-6 binding; leukemia inhibitory factor receptor activity; oncostatin-M receptor ac…	membrane; integral component of membrane; plasma membrane; extracellular region; external side of plasma membrane; receptor complex; extracellular exosome; interleukin-6 receptor complex; ciliary neurotrophic factor receptor complex; oncostatin-M receptor complex; dendrite; neuronal cell body; cell body
ACTN4	4.40036e-05	0.158381	0.551	0.494	1	protein transport; positive regulation of nucleic acid-templated transcription; response to hypoxia; regulation of apoptotic process; positive regulation of pinocytosis; actin filament bundle assembly; negative regulation of cellular component movement; positive regulation of cellular component movement; bicellular tight junction assembly; protein localization to bicellular tight junction; positi…	RNA binding; metal ion binding; calcium ion binding; actin binding; chromatin DNA binding; protein homodimerization activity; protein binding; transcription coactivator activity; nuclear receptor transcription coactivator activity; protein-containing complex binding; protein N-terminus binding; actin filament binding; retinoic acid receptor binding; ion channel binding; integrin binding; RNA poly…	nucleus; cytoplasm; cytosol; extracellular space; cytoskeleton; nuclear body; perinuclear region of cytoplasm; cell junction; focal adhesion; extracellular region; stress fiber; brush border; cell-cell junction; Z disc; cortical cytoskeleton; pseudopodium; protein-containing complex; neuron projection; extracellular exosome; ribonucleoprotein complex; platelet alpha granule lumen; actin cytoskele…
BRD3	4.40623e-05	-0.116532	0.555	0.665	1	chromatin organization; regulation of transcription by RNA polymerase II	protein binding; chromatin binding; lysine-acetylated histone binding	nucleus
C12orf57	4.41151e-05	-0.113972	0.971	0.983	1	cognition; post-embryonic development; regulation of skeletal muscle contraction; corpus callosum morphogenesis; third ventricle development; psychomotor behavior; camera-type eye morphogenesis		cytoplasm; nuclear speck
NECAP2	4.41333e-05	-0.111941	0.263	0.356	1	protein transport; endocytosis		membrane; plasma membrane; cytoplasmic vesicle; clathrin-coated pit; clathrin-coated vesicle membrane; intracellular; clathrin vesicle coat
ROBO2	4.42674e-05	0.178359	0.604	0.536	1	ventricular septum morphogenesis; multicellular organism development; cell differentiation; chemotaxis; nervous system development; axon guidance; aorta development; brain development; homophilic cell adhesion via plasma membrane adhesion molecules; outflow tract septum morphogenesis; metanephros development; aortic valve morphogenesis; pulmonary valve morphogenesis; negative regulation of synaps…	protein binding; identical protein binding; axon guidance receptor activity	membrane; integral component of membrane; cell surface; plasma membrane; extracellular exosome; axolemma
PHLPP1	4.475e-05	-0.130773	0.434	0.529	1	apoptotic process; protein dephosphorylation; regulation of apoptotic process; negative regulation of protein kinase B signaling; regulation of p38MAPK cascade; regulation of T cell anergy; entrainment of circadian clock; regulation of MAPK cascade; regulation of JNK cascade	metal ion binding; hydrolase activity; catalytic activity; phosphoprotein phosphatase activity; protein binding; protein serine/threonine phosphatase activity	nucleus; cytoplasm; membrane; plasma membrane; cytosol; nuclear membrane
ZFHX3	4.49004e-05	0.192052	0.409	0.339	1	regulation of transcription, DNA-templated; circadian regulation of gene expression; positive regulation of transcription, DNA-templated; muscle organ development; negative regulation of transcription by RNA polymerase II; regulation of neuron differentiation; transcription by RNA polymerase II; brain development; positive regulation of transcription by RNA polymerase II; regulation of locomotor …	nucleic acid binding; zinc ion binding; metal ion binding; DNA binding; DNA-binding transcription factor activity; sequence-specific DNA binding; protein binding; RNA polymerase II proximal promoter sequence-specific DNA binding; DNA-binding transcription factor activity, RNA polymerase II-specific; DNA-binding transcription repressor activity, RNA polymerase II-specific; transcription regulatory…	nucleus; cytoplasm; nuclear chromatin; nucleoplasm; transcription factor complex; nuclear body
ECI1	4.50868e-05	0.117239	0.899	0.866	1	lipid metabolic process; fatty acid metabolic process; fatty acid beta-oxidation	isomerase activity; catalytic activity; dodecenoyl-CoA delta-isomerase activity; enoyl-CoA hydratase activity	mitochondrion; mitochondrial matrix
LIMCH1	4.52107e-05	-0.125327	0.323	0.422	1	actomyosin structure organization; positive regulation of protein phosphorylation; positive regulation of stress fiber assembly; negative regulation of cell migration; regulation of focal adhesion assembly	metal ion binding; actin binding; myosin II head/neck binding; protein binding	cytoplasm; cytoskeleton; stress fiber; myosin II complex
CEP55	4.5703e-05	0.133292	0.604	0.507	1	cell division; cell cycle; multicellular organism development; mitotic cytokinesis; regulation of phosphatidylinositol 3-kinase signaling; establishment of protein localization; midbody abscission; renal system development; cranial skeletal system development	protein binding	cytoplasm; membrane; plasma membrane; cytoskeleton; microtubule organizing center; midbody; centrosome; centriole; cleavage furrow; Flemming body; intercellular bridge
EFNB1	4.6858e-05	-0.141263	0.684	0.744	1	multicellular organism development; cell differentiation; ephrin receptor signaling pathway; nervous system development; axon guidance; cell-cell signaling; cell adhesion; neural crest cell migration; embryonic pattern specification; T cell costimulation; positive regulation of T cell proliferation	protein binding; ephrin receptor binding	nucleus; membrane; integral component of membrane; plasma membrane; synapse; membrane raft; extracellular exosome; integral component of plasma membrane; cytoplasm
CXADR	4.81584e-05	0.131383	0.475	0.386	1	cell adhesion; viral entry into host cell; regulation of immune response; leukocyte migration; neutrophil chemotaxis; mitochondrion organization; heart development; viral process; actin cytoskeleton reorganization; heterophilic cell-cell adhesion via plasma membrane cell adhesion molecules; cardiac muscle fiber development; regulation of AV node cell action potential; cell-cell junction organizat…	protein binding; integrin binding; beta-catenin binding; PDZ domain binding; virus receptor activity; cell adhesion molecule binding; connexin binding; cell adhesive protein binding involved in AV node cell-bundle of His cell communication	membrane; integral component of membrane; nucleoplasm; plasma membrane; cell junction; extracellular region; membrane raft; integral component of plasma membrane; bicellular tight junction; filopodium; growth cone; acrosomal vesicle; basolateral plasma membrane; protein-containing complex; adherens junction; cell-cell adherens junction; neuron projection; cell-cell junction; apicolateral plasma m…
SUMF2	4.83195e-05	-0.10703	0.272	0.372	1	glycosphingolipid metabolic process; post-translational protein modification	metal ion binding	endoplasmic reticulum; endoplasmic reticulum lumen
ZNF22	4.94661e-05	-0.15096	0.558	0.654	1	regulation of transcription by RNA polymerase II; regulation of transcription, DNA-templated; odontogenesis	nucleic acid binding; metal ion binding; DNA binding; DNA-binding transcription factor activity; sequence-specific DNA binding; DNA-binding transcription factor activity, RNA polymerase II-specific; zinc ion binding	nucleus; nucleoplasm
CCDC47	5.1157e-05	-0.120801	0.582	0.676	1	osteoblast differentiation; endoplasmic reticulum calcium ion homeostasis; ERAD pathway; ER overload response; endoplasmic reticulum organization; post-embryonic development; ubiquitin-dependent ERAD pathway; calcium ion homeostasis	RNA binding; protein binding; calcium ion binding	membrane; integral component of membrane; endoplasmic reticulum; endoplasmic reticulum membrane; rough endoplasmic reticulum membrane; rough endoplasmic reticulum
RPS25	5.19191e-05	-0.104514	1	0.999	1	translation; viral transcription; translational initiation; nuclear-transcribed mRNA catabolic process, nonsense-mediated decay; SRP-dependent cotranslational protein targeting to membrane	RNA binding; protein binding; structural constituent of ribosome	nucleus; ribosome; cytosolic small ribosomal subunit; nucleolus; nucleoplasm; cytosol; extracellular exosome; postsynaptic density; small ribosomal subunit
KIF3B	5.27041e-05	0.123951	0.32	0.238	1	microtubule-based movement; intraciliary transport involved in cilium assembly; retrograde vesicle-mediated transport, Golgi to endoplasmic reticulum; antigen processing and presentation of exogenous peptide antigen via MHC class II; mitotic spindle assembly; mitotic spindle organization; mitotic centrosome separation; determination of left/right symmetry; anterograde axonal transport; positive r…	nucleotide binding; ATP binding; microtubule motor activity; protein binding; microtubule binding; ATPase activity; ATP-dependent microtubule motor activity, plus-end-directed; Rho GTPase binding; intraciliary transport particle B binding	cytoplasm; membrane; axon cytoplasm; cytoskeleton; cell projection; microtubule; cilium; ciliary tip; cytosol; extracellular exosome; kinesin complex; spindle microtubule; microtubule cytoskeleton; centrosome; spindle; plus-end kinesin complex; kinesin II complex; axon; midbody
ZNF107	5.27835e-05	-0.103118	0.289	0.39	1	regulation of transcription, DNA-templated	nucleic acid binding; metal ion binding; DNA binding	nucleus; intracellular
USP34	5.418e-05	-0.125592	0.537	0.633	1	protein deubiquitination; proteolysis; ubiquitin-dependent protein catabolic process; Wnt signaling pathway; protein K48-linked deubiquitination; positive regulation of canonical Wnt signaling pathway	hydrolase activity; peptidase activity; cysteine-type peptidase activity; thiol-dependent ubiquitinyl hydrolase activity; thiol-dependent ubiquitin-specific protease activity; protein binding; cysteine-type endopeptidase activity	cytoplasm; cytosol
RPL22L1	5.52115e-05	-0.145028	0.68	0.762	1	translation; cytoplasmic translation	structural constituent of ribosome; RNA binding	ribosome; intracellular
HNRNPA2B1	5.58045e-05	-0.10498	1	1	1	mRNA processing; RNA splicing; mRNA transport; mRNA export from nucleus; mRNA splicing, via spliceosome; interleukin-12-mediated signaling pathway; RNA metabolic process; primary miRNA processing; G-quadruplex DNA unwinding; RNA transport; positive regulation of telomere maintenance via telomere lengthening; positive regulation of telomerase RNA reverse transcriptase activity; miRNA transport; ne…	nucleic acid binding; RNA binding; protein binding; mRNA binding; mRNA 3'-UTR binding; N6-methyladenosine-containing RNA binding; miRNA binding; G-rich strand telomeric DNA binding; single-stranded telomeric DNA binding; pre-mRNA intronic binding	nucleus; cytoplasm; membrane; nucleoplasm; spliceosomal complex; extracellular region; catalytic step 2 spliceosome; extracellular exosome; ribonucleoprotein complex; chromosome, telomeric region; nuclear matrix; Cajal body
MPST	5.74719e-05	-0.120947	0.535	0.613	1	transsulfuration; response to toxic substance; sulfur amino acid catabolic process; cyanate catabolic process; hydrogen sulfide biosynthetic process; kidney development; liver development; spinal cord development	transferase activity; thiosulfate sulfurtransferase activity; 3-mercaptopyruvate sulfurtransferase activity; identical protein binding	cytoplasm; mitochondrion; cell junction; synapse; extracellular exosome; mitochondrial matrix; neuron projection; cytosol
CNTFR	5.77214e-05	-0.137881	0.595	0.668	1	nervous system development; signal transduction; cytokine-mediated signaling pathway; ciliary neurotrophic factor-mediated signaling pathway; suckling behavior; brainstem development; sex differentiation; positive regulation of cell population proliferation; negative regulation of neuron apoptotic process; skeletal muscle organ development	protein binding; cytokine receptor activity; signaling receptor binding; cytokine binding; ciliary neurotrophic factor receptor activity	membrane; plasma membrane; external side of plasma membrane; anchored component of membrane; receptor complex; extrinsic component of membrane; ciliary neurotrophic factor receptor complex; apical plasma membrane; CNTFR-CLCF1 complex
CLUAP1	5.92943e-05	0.154867	0.542	0.478	1	intraciliary transport involved in cilium assembly; cell projection organization; cilium assembly	protein binding	nucleus; intracellular membrane-bounded organelle; nucleoplasm; cell projection; cilium; intraciliary transport particle B; ciliary tip; centrosome
SNX10	5.94502e-05	-0.131865	0.281	0.372	1	protein transport; cilium assembly; protein localization to cilium; cell projection organization; osteoclast differentiation; endosome organization; protein localization to centrosome; gastric acid secretion; endocytosis; bone mineralization; tooth eruption; bone resorption; calcium ion homeostasis; ruffle assembly; cellular response to leukemia inhibitory factor	phosphatidylinositol binding; protein binding; lipid binding; ATPase binding; 1-phosphatidylinositol binding	nucleus; cytoplasm; membrane; endoplasmic reticulum; cytoskeleton; centrosome; microtubule organizing center; endosome; extrinsic component of endosome membrane; endosome membrane; secretory granule; apical cytoplasm
SEMA6A	5.95905e-05	0.144221	0.406	0.33	1	negative regulation of sprouting angiogenesis; negative regulation of angiogenesis; cellular response to vascular endothelial growth factor stimulus; negative regulation of ERK1 and ERK2 cascade; negative regulation of vascular endothelial growth factor signaling pathway; apoptotic process; multicellular organism development; cell differentiation; nervous system development; cytoskeleton organiza…	semaphorin receptor binding; protein binding; chemorepellent activity; transmembrane signaling receptor activity	membrane; integral component of membrane; plasma membrane; extracellular space; integral component of plasma membrane; axon
GNPDA1	6.0625e-05	-0.12802	0.378	0.468	1	carbohydrate metabolic process; N-acetylglucosamine metabolic process; N-acetylglucosamine catabolic process; single fertilization; UDP-N-acetylglucosamine biosynthetic process; generation of precursor metabolites and energy; glucosamine catabolic process; N-acetylneuraminate catabolic process	hydrolase activity; glucosamine-6-phosphate deaminase activity; protein binding; identical protein binding	cytoplasm; cytosol; extracellular exosome
CHST10	6.16765e-05	-0.11624	0.251	0.337	1	carbohydrate metabolic process; carbohydrate biosynthetic process; cell adhesion; proteoglycan biosynthetic process	transferase activity; sulfotransferase activity; HNK-1 sulfotransferase activity	membrane; integral component of membrane; Golgi apparatus; Golgi membrane
CCDC117	6.19659e-05	-0.104703	0.183	0.267	1		protein binding
DNAAF4	6.26299e-05	0.142718	0.398	0.316	1	cilium movement; nervous system development; inner dynein arm assembly; heart development; regulation of proteasomal protein catabolic process; determination of left/right symmetry; neuron migration; outer dynein arm assembly; regulation of intracellular estrogen receptor signaling pathway; epithelial cilium movement involved in extracellular fluid movement	protein binding; estrogen receptor binding	nucleus; cytoplasm; cytosol; plasma membrane; extracellular region; centrosome; non-motile cilium
ITPRID2	6.34973e-05	0.12102	0.302	0.223	1		signaling receptor binding; actin binding; actin filament binding	cytoplasm; nucleus; cytosol; plasma membrane
PIM1	6.47769e-05	-0.104901	0.168	0.25	1	positive regulation of cardiac muscle cell proliferation; protein phosphorylation; phosphorylation; negative regulation of apoptotic process; cell cycle; apoptotic process; hyaluronan metabolic process; positive regulation of transcription, DNA-templated; protein stabilization; regulation of hematopoietic stem cell proliferation; cell population proliferation; multicellular organism development; …	metal ion binding; nucleotide binding; protein kinase activity; protein serine/threonine kinase activity; ATP binding; kinase activity; transferase activity; protein binding; manganese ion binding; transcription factor binding; ribosomal small subunit binding	cytoplasm; nucleus; membrane; nucleolus; cytosol; plasma membrane; nucleoplasm
MANF	6.48539e-05	0.164478	0.728	0.682	1	signal transduction; response to unfolded protein; neuron projection development; platelet degranulation; regulation of response to endoplasmic reticulum stress; dopaminergic neuron differentiation	RNA binding; growth factor activity; protein binding; lipid binding; sulfatide binding	nucleus; endoplasmic reticulum; extracellular region; extracellular space; endoplasmic reticulum lumen; cytosol; sarcoplasmic reticulum; sarcoplasmic reticulum lumen; perinuclear region of cytoplasm
ATN1	6.49672e-05	-0.137771	0.395	0.484	1	negative regulation of transcription by RNA polymerase II; central nervous system development; neuron apoptotic process	protein binding; DNA binding; transcription corepressor activity; protein domain specific binding; RNA polymerase II transcription factor binding	nucleus; cytoplasm; nucleoplasm; perinuclear region of cytoplasm; cell junction; nuclear matrix
IDH1	6.5757e-05	0.166724	0.643	0.602	1	oxidation-reduction process; tricarboxylic acid cycle; protein targeting to peroxisome; neutrophil degranulation; isocitrate metabolic process; glyoxylate cycle; 2-oxoglutarate metabolic process; NADP metabolic process; NADPH regeneration; glutathione metabolic process; response to oxidative stress; female gonad development; response to organic cyclic compound; response to steroid hormone; regula…	metal ion binding; magnesium ion binding; oxidoreductase activity; protein homodimerization activity; oxidoreductase activity, acting on the CH-OH group of donors, NAD or NADP as acceptor; NAD binding; identical protein binding; cadherin binding; isocitrate dehydrogenase (NADP+) activity; isocitrate dehydrogenase activity; NADP binding	cytoplasm; cytosol; extracellular region; peroxisome; mitochondrion; extracellular exosome; peroxisomal matrix; secretory granule lumen; ficolin-1-rich granule lumen; tertiary granule lumen
MZT2B	6.58946e-05	-0.109128	0.972	0.995	1		protein binding	centrosome; cytosol; nucleoplasm; cytoplasm; cytoskeleton; microtubule organizing center; spindle; gamma-tubulin ring complex
BRI3	6.72857e-05	0.149219	0.896	0.881	1	neutrophil degranulation	identical protein binding	membrane; integral component of membrane; lysosomal membrane; lysosome; plasma membrane; azurophil granule membrane
DDAH1	6.73231e-05	0.154596	0.393	0.318	1	negative regulation of cell population proliferation; negative regulation of vascular permeability; citrulline metabolic process; arginine catabolic process; positive regulation of nitric oxide biosynthetic process; regulation of nitric-oxide synthase activity; regulation of systemic arterial blood pressure; arginine metabolic process; nitric oxide mediated signal transduction; negative regulatio…	metal ion binding; hydrolase activity; dimethylargininase activity; catalytic activity; amino acid binding	cytosol; extracellular exosome
BID	6.82793e-05	-0.117115	0.339	0.427	1	regulation of apoptotic process; apoptotic process; positive regulation of apoptotic process; activation of cysteine-type endopeptidase activity involved in apoptotic process; positive regulation of protein complex assembly; positive regulation of release of cytochrome c from mitochondria; extrinsic apoptotic signaling pathway via death domain receptors; apoptotic mitochondrial changes; positive …	protein binding; death receptor binding; ubiquitin protein ligase binding; protein heterodimerization activity	cytoplasm; membrane; cytosol; mitochondrion; mitochondrial outer membrane; mitochondrial membrane; integral component of mitochondrial membrane
CHKA	6.94773e-05	-0.108509	0.33	0.42	1	phosphorylation; lipid metabolic process; phosphatidylethanolamine biosynthetic process; phospholipid biosynthetic process; CDP-choline pathway; phosphatidylcholine biosynthetic process; lipid transport; ethanolamine metabolic process; response to toxic substance; choline metabolic process; response to 3-methylcholanthrene	nucleotide binding; ATP binding; kinase activity; transferase activity; drug binding; choline kinase activity; cholinesterase activity; ethanolamine kinase activity; choline binding; protein homodimerization activity	cytoplasm; cytosol
VPS26A	7.04341e-05	-0.113424	0.535	0.613	1	intracellular protein transport; protein transport; retrograde transport, endosome to Golgi; retrograde transport, endosome to plasma membrane; Wnt signaling pathway; regulation of macroautophagy	protein binding	cytoplasm; membrane; endosome; lysosome; early endosome; cytosol; endosome membrane; vesicle; retromer complex; retromer, cargo-selective complex; tubular endosome; cell
APRT	7.12249e-05	0.122039	0.408	0.332	1	nucleoside metabolic process; purine ribonucleoside salvage; neutrophil degranulation; purine-containing compound salvage; adenine salvage; lactation; grooming behavior; cellular response to insulin stimulus; AMP salvage; adenine metabolic process	transferase activity; transferase activity, transferring glycosyl groups; adenine binding; adenine phosphoribosyltransferase activity; AMP binding	cytoplasm; cytosol; nucleoplasm; extracellular region; extracellular exosome; secretory granule lumen
ENAH	7.22139e-05	0.140885	0.904	0.881	1	axon guidance; actin polymerization or depolymerization; actin polymerization-dependent cell motility	actin binding; protein binding; SH3 domain binding; profilin binding; WW domain binding	cytoplasm; cytosol; plasma membrane; focal adhesion; cell junction; cytoskeleton; cell projection; synapse; lamellipodium; filopodium
AURKA	7.26046e-05	0.207998	0.664	0.569	1	protein phosphorylation; phosphorylation; cell division; cell cycle; centrosome cycle; microtubule cytoskeleton organization; mitotic cell cycle; meiotic cell cycle; mitotic spindle organization; DNA damage response, signal transduction by p53 class mediator resulting in cell cycle arrest; cell projection organization; negative regulation of G2/M transition of mitotic cell cycle; anaphase-promoti…	nucleotide binding; protein kinase activity; protein serine/threonine kinase activity; ATP binding; kinase activity; transferase activity; protein binding; protein kinase binding; protein serine/threonine/tyrosine kinase activity; histone serine kinase activity; protein heterodimerization activity; ubiquitin protein ligase binding	perinuclear region of cytoplasm; nucleus; cytoplasm; centrosome; cytosol; cytoskeleton; cell projection; microtubule; spindle pole; microtubule organizing center; spindle; midbody; condensed nuclear chromosome, centromeric region; cilium; nucleoplasm; centriole; mitotic spindle pole; spindle microtubule; microtubule cytoskeleton; spindle pole centrosome; chromosome passenger complex; spindle midz…
SAP30	7.29618e-05	-0.143687	0.692	0.768	1	histone deacetylation; regulation of transcription, DNA-templated; negative regulation of transcription by RNA polymerase II; skeletal muscle cell differentiation	metal ion binding; DNA binding; protein binding; transcription corepressor activity; histone deacetylase activity	nucleus; nucleoplasm; histone deacetylase complex
PDIA6	7.77645e-05	0.136938	0.941	0.935	1	cell redox homeostasis; oxidation-reduction process; cellular protein metabolic process; post-translational protein modification; IRE1-mediated unfolded protein response; protein folding	isomerase activity; protein binding; protein disulfide isomerase activity; peptide disulfide oxidoreductase activity	cell; membrane; endoplasmic reticulum; cytosol; extracellular space; plasma membrane; melanosome; endoplasmic reticulum lumen; endoplasmic reticulum membrane; extracellular exosome; endoplasmic reticulum-Golgi intermediate compartment; endoplasmic reticulum chaperone complex
DDX24	7.79866e-05	-0.11966	0.866	0.929	1	RNA metabolic process	nucleic acid binding; RNA binding; nucleotide binding; ATP binding; hydrolase activity; helicase activity; RNA helicase activity	membrane; nucleolus
GRID2	7.98138e-05	0.106989	0.245	0.167	1	ion transport; ion transmembrane transport; ionotropic glutamate receptor signaling pathway; modulation of chemical synaptic transmission; positive regulation of synapse assembly; synaptic transmission, glutamatergic; excitatory synapse assembly; heterophilic cell-cell adhesion via plasma membrane cell adhesion molecules; glutamate receptor signaling pathway; regulation of neuron projection devel…	ion channel activity; signaling receptor activity; ionotropic glutamate receptor activity; ligand-gated ion channel activity; protein binding; glutamate receptor activity; scaffold protein binding; transmitter-gated ion channel activity involved in regulation of postsynaptic membrane potential; PDZ domain binding	membrane; integral component of membrane; plasma membrane; cell junction; synapse; postsynaptic membrane; integral component of plasma membrane; dendritic spine; postsynaptic density membrane; ionotropic glutamate receptor complex; somatodendritic compartment; parallel fiber to Purkinje cell synapse; glutamatergic synapse; integral component of postsynaptic density membrane
[truncated: 449 more rows]
