# Supplementary material for: FGF8-mediated gene regulation affects regional identity in human cerebral organoids
Source: eLife. 2024 Nov 1;13:e98096. doi: 10.7554/eLife.98096 (PMC11581432; doi:10.7554/eLife.98096)
Supplement: Figure 6—source data 2. — Excel file listing genes with differential expression between WNTi and WNTi + FGF8 organoids in clusters 2 and 5 (glutamatergic non-cycling progenitors), visualized as a volcano plot in Figure 6A. [file elife-98096-fig6-data2.xlsx]

## Sheet: S21306_FGF8vsCTL_cls2-5
Gene name	p_val	avg_log2FC	pct.1	pct.2	p_val_adj	GO:biological proces	GO:molecular function	GO:cellular component
NR2F1	1.61973e-264	-1.74293	0.162	0.868	5.92836e-260	regulation of transcription, DNA-templated; intracellular receptor signaling pathway; steroid hormone mediated signaling pathway; cell differentiation; regulation of transcription by RNA polymerase II; negative regulation of transcription by RNA polymerase II; positive regulation of transcription by RNA polymerase II; anatomical structure development; signal transduction; transcription initiation…	zinc ion binding; metal ion binding; DNA binding; DNA-binding transcription factor activity; sequence-specific DNA binding; steroid hormone receptor activity; RNA polymerase II regulatory region sequence-specific DNA binding; protein binding; DNA-binding transcription factor activity, RNA polymerase II-specific; RNA polymerase II proximal promoter sequence-specific DNA binding; DNA-binding transc…	nucleus; cytosol; nucleoplasm
ZIC1	3.04924e-141	0.607335	0.357	0.017	1.11605e-136	multicellular organism development; cell differentiation; positive regulation of transcription, DNA-templated; nervous system development; positive regulation of protein import into nucleus; central nervous system development; brain development; pattern specification process; inner ear morphogenesis; regulation of smoothened signaling pathway; adult walking behavior; spinal cord development; posi…	nucleic acid binding; metal ion binding; DNA binding; DNA-binding transcription factor activity; DNA-binding transcription factor activity, RNA polymerase II-specific; RNA polymerase II regulatory region sequence-specific DNA binding; RNA polymerase II proximal promoter sequence-specific DNA binding; DNA-binding transcription activator activity, RNA polymerase II-specific	nucleus; cytoplasm
FGFR3	1.71823e-133	-0.918866	0.053	0.528	6.28889e-129	protein phosphorylation; phosphorylation; positive regulation of cell population proliferation; apoptotic process; fibroblast growth factor receptor signaling pathway; transmembrane receptor protein tyrosine kinase signaling pathway; MAPK cascade; positive regulation of MAPK cascade; bone morphogenesis; positive regulation of ERK1 and ERK2 cascade; skeletal system development; positive regulation…	nucleotide binding; protein kinase activity; ATP binding; kinase activity; transferase activity; protein tyrosine kinase activity; transmembrane receptor protein tyrosine kinase activity; protein binding; identical protein binding; fibroblast growth factor-activated receptor activity; fibroblast growth factor binding	membrane; integral component of membrane; endoplasmic reticulum; Golgi apparatus; plasma membrane; extracellular region; cytoplasmic vesicle; focal adhesion; integral component of plasma membrane; receptor complex; transport vesicle; nucleus; cytoplasm; cell surface
CCND2	4.61448e-117	-0.990838	0.704	0.926	1.68894e-112	positive regulation of cell population proliferation; positive regulation of G1/S transition of mitotic cell cycle; negative regulation of apoptotic process; positive regulation of protein phosphorylation; protein phosphorylation; cell division; cell cycle; regulation of cyclin-dependent protein serine/threonine kinase activity; mitotic cell cycle phase transition; positive regulation of cyclin-d…	protein binding; protein kinase binding; protein kinase activity; cyclin-dependent protein serine/threonine kinase regulator activity	nucleus; cytoplasm; membrane; nucleoplasm; cytosol; nucleolus; nuclear membrane; chromatin; cyclin-dependent protein kinase holoenzyme complex
MOXD1	2.20033e-116	0.997582	0.499	0.121	8.05343e-112	oxidation-reduction process; octopamine biosynthetic process; dopamine catabolic process; norepinephrine biosynthetic process	metal ion binding; monooxygenase activity; oxidoreductase activity; catalytic activity; protein binding; copper ion binding; oxidoreductase activity, acting on paired donors, with incorporation or reduction of molecular oxygen, reduced ascorbate as one donor, and incorporation of one atom of oxygen; dopamine beta-monooxygenase activity	membrane; integral component of membrane; endoplasmic reticulum; endoplasmic reticulum membrane; extracellular space; cytoplasm; secretory granule membrane
ANOS1	2.69339e-112	0.567585	0.34	0.034	9.85808e-108	cell adhesion; negative regulation of endopeptidase activity; chemotaxis; negative regulation of peptidase activity; axon guidance; fibroblast growth factor receptor signaling pathway	protein binding; peptidase inhibitor activity; heparin binding; serine-type endopeptidase inhibitor activity; extracellular matrix structural constituent	membrane; extracellular region; plasma membrane; extracellular space; extracellular matrix
EFNA5	4.96981e-112	0.580417	0.36	0.043	1.819e-107	positive regulation of protein phosphorylation; multicellular organism development; cell differentiation; ephrin receptor signaling pathway; nervous system development; axon guidance; regulation of microtubule cytoskeleton organization; regulation of actin cytoskeleton organization; activation of transmembrane receptor protein tyrosine kinase activity; regulation of GTPase activity; positive regu…	protein binding; ephrin receptor binding; transmembrane receptor protein tyrosine kinase activator activity; neurotrophin TRKA receptor binding; neurotrophin TRKB receptor binding; neurotrophin TRKC receptor binding; chemorepellent activity	membrane; plasma membrane; caveola; anchored component of membrane; anchored component of external side of plasma membrane; basement membrane; adherens junction; cell periphery; GABA-ergic synapse; integral component of membrane
BASP1	2.48824e-96	-0.677814	0.928	0.98	9.10722e-92	negative regulation of transcription, DNA-templated; substantia nigra development; glomerular visceral epithelial cell differentiation; diaphragm development; thorax and anterior abdomen determination; gonad development; mesenchymal to epithelial transition; positive regulation of heart growth; metanephric mesenchyme development; positive regulation of metanephric ureteric bud development	protein binding; transcription corepressor activity; transcription regulatory region DNA binding; protein domain specific binding	plasma membrane; nucleus; cytoplasm; nuclear speck; membrane; cell junction; cell projection; growth cone; extracellular exosome; COP9 signalosome; cytoskeleton; vesicle
ZIC3	5.24269e-91	0.421165	0.264	0.02	1.91888e-86	multicellular organism development; cell differentiation; positive regulation of transcription, DNA-templated; nervous system development; positive regulation of transcription by RNA polymerase II; central nervous system development; heart looping; determination of left/right symmetry; somatic stem cell population maintenance; pattern specification process; anterior/posterior pattern specificatio…	nucleic acid binding; metal ion binding; DNA binding; DNA-binding transcription factor activity; sequence-specific DNA binding; DNA-binding transcription factor activity, RNA polymerase II-specific; RNA polymerase II regulatory region sequence-specific DNA binding; protein binding; RNA polymerase II proximal promoter sequence-specific DNA binding; DNA-binding transcription activator activity, RNA…	nucleus; cytoplasm; nucleoplasm
SORCS1	4.81709e-90	0.563966	0.354	0.063	1.7631e-85	neuropeptide signaling pathway; post-Golgi vesicle-mediated transport	protein binding; neuropeptide receptor activity	membrane; integral component of membrane; Golgi apparatus
CYP26A1	8.92681e-70	0.361151	0.168	0.002	3.2673e-65	oxidation-reduction process; xenobiotic metabolic process; vitamin metabolic process; ergosterol biosynthetic process; sterol metabolic process; retinoic acid catabolic process; retinoic acid metabolic process; negative regulation of retinoic acid receptor signaling pathway; kidney development; response to retinoic acid; response to vitamin A	metal ion binding; monooxygenase activity; oxidoreductase activity; iron ion binding; oxidoreductase activity, acting on paired donors, with incorporation or reduction of molecular oxygen; heme binding; oxidoreductase activity, acting on paired donors, with incorporation or reduction of molecular oxygen, NAD(P)H as one donor, and incorporation of one atom of oxygen; C-22 sterol desaturase activit…	membrane; endoplasmic reticulum; endoplasmic reticulum membrane; organelle membrane; intracellular membrane-bounded organelle
LINC01896	1.5598e-69	0.351941	0.195	0.011	5.70901e-65
NFIB	3.78276e-69	-0.719479	0.608	0.845	1.38453e-64	regulation of transcription, DNA-templated; DNA replication; positive regulation of transcription, DNA-templated; positive regulation of transcription by RNA polymerase II; negative regulation of transcription by RNA polymerase II; brain development; chondrocyte differentiation; glial cell differentiation; principal sensory nucleus of trigeminal nerve development; anterior commissure morphogenesi…	DNA binding; DNA-binding transcription factor activity; DNA-binding transcription factor activity, RNA polymerase II-specific; RNA polymerase II proximal promoter sequence-specific DNA binding; DNA-binding transcription activator activity, RNA polymerase II-specific; double-stranded DNA binding	nucleus; fibrillar center; nuclear chromatin; cerebellar mossy fiber; intracellular
AC092958.1	1.92279e-66	0.340828	0.205	0.018	7.03762e-62
C1orf61	7.32619e-63	-0.542523	0.92	0.992	2.68146e-58	positive regulation of transcription by RNA polymerase II		nucleus
TOX	7.54585e-62	0.404295	0.337	0.089	2.76186e-57	lymphocyte differentiation; positive regulation of natural killer cell differentiation; lymph node development; Peyer's patch development	DNA binding	nucleus
LHFPL6	1.48226e-60	0.485428	0.252	0.047	5.4252e-56			membrane; integral component of membrane
MEIS2	3.59478e-59	-0.694409	0.718	0.888	1.31572e-54	regulation of transcription, DNA-templated; multicellular organism development; positive regulation of transcription by RNA polymerase II; transcription by RNA polymerase II; negative regulation of myeloid cell differentiation; negative regulation of transcription by RNA polymerase II; eye development; visual learning; response to mechanical stimulus; pancreas development; positive regulation of …	DNA binding; protein binding; DNA-binding transcription factor activity, RNA polymerase II-specific; RNA polymerase II proximal promoter sequence-specific DNA binding; DNA-binding transcription activator activity, RNA polymerase II-specific; transcription factor binding; transcription corepressor activity; DNA-binding transcription factor activity; transcription coregulator activity; sequence-spe…	nucleus; cytoplasm; perinuclear region of cytoplasm; nuclear chromatin
SALL3	5.00314e-59	0.26603	0.173	0.012	1.8312e-54	regulation of transcription, DNA-templated; olfactory bulb interneuron development; forelimb morphogenesis; hindlimb morphogenesis; negative regulation of smoothened signaling pathway	nucleic acid binding; metal ion binding; DNA binding	nucleus
FZD3	2.36803e-58	0.612185	0.871	0.736	8.66722e-54	signal transduction; cell surface receptor signaling pathway; G protein-coupled receptor signaling pathway; multicellular organism development; Wnt signaling pathway; nervous system development; canonical Wnt signaling pathway; non-canonical Wnt signaling pathway; neuron differentiation; Wnt signaling pathway, planar cell polarity pathway; Wnt signaling pathway, calcium modulating pathway; midbra…	transmembrane signaling receptor activity; G protein-coupled receptor activity; Wnt-activated receptor activity; protein binding; Wnt-protein binding; PDZ domain binding	cytoplasm; membrane; integral component of membrane; plasma membrane; cell surface; apical plasma membrane; lateral plasma membrane; axon; dendrite; filopodium tip; neuronal cell body; apical part of cell; presynaptic active zone
HOPX	8.78453e-58	1.05731	0.594	0.336	3.21523e-53	cell differentiation; multicellular organism development; regulation of transcription by RNA polymerase II; chaperone-mediated protein complex assembly; trophectodermal cell differentiation; negative regulation of cell differentiation	DNA binding; protein binding; DNA-binding transcription factor activity, RNA polymerase II-specific	nucleus; cytoplasm; nuclear chromatin
DLX2	1.41817e-57	0.43347	0.169	0.011	5.19063e-53	regulation of transcription, DNA-templated; multicellular organism development; cell differentiation; regulation of transcription by RNA polymerase II; positive regulation of transcription by RNA polymerase II; negative regulation of transcription by RNA polymerase II; positive regulation of cell differentiation; brain development; negative regulation of photoreceptor cell differentiation; positi…	DNA binding; sequence-specific DNA binding; protein binding; DNA-binding transcription factor activity; RNA polymerase II proximal promoter sequence-specific DNA binding; DNA-binding transcription factor activity, RNA polymerase II-specific; RNA polymerase II regulatory region sequence-specific DNA binding; DNA-binding transcription activator activity, RNA polymerase II-specific; chromatin bindin…	nucleus; nuclear chromatin
GSX2	2.93641e-56	0.316184	0.164	0.011	1.07475e-51	regulation of transcription, DNA-templated; multicellular organism development; regulation of transcription by RNA polymerase II; regulation of respiratory gaseous exchange by nervous system process; pattern specification process; central nervous system development; brain development; spinal cord association neuron differentiation; subpallium development; hindbrain morphogenesis; forebrain dorsal…	DNA binding; DNA-binding transcription factor activity; sequence-specific DNA binding; DNA-binding transcription factor activity, RNA polymerase II-specific	nucleus; nuclear chromatin
NCAM1	4.57548e-54	-0.597254	0.417	0.703	1.67467e-49	cell adhesion; viral entry into host cell; MAPK cascade; viral process; axon guidance; interferon-gamma-mediated signaling pathway; commissural neuron axon guidance; regulation of semaphorin-plexin signaling pathway	protein binding; virus receptor activity	membrane; integral component of membrane; cytosol; plasma membrane; extracellular region; anchored component of membrane; collagen-containing extracellular matrix; cell surface; Golgi membrane; external side of plasma membrane
CRH	4.05575e-49	1.21074	0.197	0.032	1.48445e-44	inflammatory response; positive regulation of protein phosphorylation; synaptic transmission, dopaminergic; negative regulation of systemic arterial blood pressure; glucocorticoid biosynthetic process; learning or memory; steroid metabolic process; positive regulation of cell population proliferation; associative learning; hormone-mediated apoptotic signaling pathway; positive regulation of gene …	protein binding; hormone activity; corticotropin-releasing hormone receptor 1 binding; corticotropin-releasing hormone receptor 2 binding; signaling receptor binding; neuropeptide hormone activity; corticotropin-releasing hormone activity	extracellular region; extracellular space; cytoplasm; neuronal cell body; varicosity; perikaryon
ETV1	9.47634e-49	0.551491	0.492	0.237	3.46844e-44	regulation of transcription, DNA-templated; transcription by RNA polymerase II; cell differentiation; regulation of transcription by RNA polymerase II; positive regulation of transcription by RNA polymerase II; peripheral nervous system neuron development; axon guidance; muscle organ development; mechanosensory behavior; positive regulation of transcription, DNA-templated	DNA binding; DNA-binding transcription factor activity; sequence-specific DNA binding; protein binding; DNA-binding transcription factor activity, RNA polymerase II-specific; RNA polymerase II proximal promoter sequence-specific DNA binding; DNA-binding transcription activator activity, RNA polymerase II-specific	nucleus; nuclear chromatin
RPL7	1.00553e-47	0.29876	0.999	0.999	3.68036e-43	maturation of LSU-rRNA from tricistronic rRNA transcript (SSU-rRNA, 5.8S rRNA, LSU-rRNA); translation; rRNA processing; viral transcription; ribosomal large subunit biogenesis; translational initiation; nuclear-transcribed mRNA catabolic process, nonsense-mediated decay; SRP-dependent cotranslational protein targeting to membrane	structural constituent of ribosome; RNA binding; protein binding; DNA binding; protein homodimerization activity; mRNA binding	cytosolic large ribosomal subunit; nucleus; cytoplasm; membrane; ribosome; nucleolus; focal adhesion; cytosol; ribonucleoprotein complex; postsynaptic density
IFI44L	1.39354e-46	-0.510072	0.244	0.532	5.10051e-42	immune response; defense response to virus	GTP binding	cytoplasm
CXXC4	3.37467e-45	0.393868	0.245	0.063	1.23516e-40		zinc ion binding; DNA binding
RPL27A	3.88126e-45	0.271151	0.997	1	1.42058e-40	translation; viral transcription; translational initiation; nuclear-transcribed mRNA catabolic process, nonsense-mediated decay; SRP-dependent cotranslational protein targeting to membrane	RNA binding; structural constituent of ribosome; protein binding	membrane; endoplasmic reticulum; cytosol; ribosome; large ribosomal subunit; cytosolic large ribosomal subunit; intracellular
EPHA5	4.95501e-42	-0.31671	0.036	0.24	1.81358e-37	protein phosphorylation; phosphorylation; transmembrane receptor protein tyrosine kinase signaling pathway; peptidyl-tyrosine phosphorylation; ephrin receptor signaling pathway; nervous system development; axon guidance; neuron development; regulation of actin cytoskeleton organization; cAMP-mediated signaling; regulation of GTPase activity; positive regulation of CREB transcription factor activi…	nucleotide binding; protein kinase activity; ATP binding; kinase activity; transferase activity; protein tyrosine kinase activity; transmembrane receptor protein tyrosine kinase activity; ephrin receptor activity; transmembrane-ephrin receptor activity; GPI-linked ephrin receptor activity; protein binding	membrane; integral component of membrane; integral component of plasma membrane; plasma membrane; cell projection; perinuclear region of cytoplasm; dendrite; receptor complex; axon; neuron projection; external side of plasma membrane; rough endoplasmic reticulum; neuronal cell body; adherens junction; cell periphery
CDH6	1.49873e-41	0.250739	0.11	0.004	5.48549e-37	cell adhesion; homophilic cell adhesion via plasma membrane adhesion molecules; cell-cell adhesion; cell-cell junction assembly; adherens junction organization; cell morphogenesis; calcium-dependent cell-cell adhesion via plasma membrane cell adhesion molecules; cell-cell adhesion mediated by cadherin; Notch signaling pathway	calcium ion binding; metal ion binding; cadherin binding; protein homodimerization activity; cytoskeletal protein binding	membrane; integral component of membrane; plasma membrane; cell surface; cell-cell adherens junction; catenin complex
FABP7	5.60658e-41	0.741194	0.995	0.99	2.05207e-36	triglyceride catabolic process; nervous system development; negative regulation of cell population proliferation; startle response; cell proliferation in forebrain; neurogenesis; epithelial cell proliferation; prepulse inhibition	lipid binding	cytoplasm; cytosol; nucleus; cell-cell junction; cell projection; neuronal cell body; cell body; cell periphery
BCAT1	7.61974e-41	0.351985	0.225	0.058	2.7889e-36	cellular amino acid biosynthetic process; branched-chain amino acid metabolic process; branched-chain amino acid biosynthetic process; G1/S transition of mitotic cell cycle; branched-chain amino acid catabolic process; leucine biosynthetic process; valine biosynthetic process	transferase activity; catalytic activity; transaminase activity; branched-chain-amino-acid transaminase activity; L-leucine transaminase activity; L-valine transaminase activity; L-isoleucine transaminase activity; identical protein binding	cytoplasm; mitochondrion; cytosol
NR2F1-AS1	1.08064e-40	-0.330858	0.038	0.237	3.95525e-36
TSPO	3.48834e-39	-0.448058	0.219	0.473	1.27677e-34	lipid transport; protein targeting to mitochondrion; C21-steroid hormone biosynthetic process; regulation of cell population proliferation; heme biosynthetic process; anion transport; steroid metabolic process; regulation of cholesterol transport; steroid biosynthetic process; ion transport; chloride transport; aging; glial cell migration; response to manganese ion; response to vitamin B1; negati…	protein binding; cholesterol binding; benzodiazepine receptor activity; androgen binding; ion channel binding	membrane; integral component of membrane; mitochondrion; endoplasmic reticulum; mitochondrial membrane; extracellular exosome; mitochondrial outer membrane
APP	5.05385e-37	0.562922	0.746	0.613	1.84976e-32	negative regulation of gene expression; cellular response to amyloid-beta; response to interleukin-1; microglial cell activation; positive regulation of NIK/NF-kappaB signaling; positive regulation of protein phosphorylation; positive regulation of gene expression; positive regulation of amyloid-beta formation; negative regulation of long-term synaptic potentiation; nervous system development; ce…	metal ion binding; DNA binding; serine-type endopeptidase inhibitor activity; protein binding; heparin binding; identical protein binding; transition metal ion binding; peptidase activator activity; signaling receptor activator activity; growth factor receptor binding; peptidase inhibitor activity; signaling receptor binding; enzyme binding; PTB domain binding	plasma membrane; nucleus; cytoplasm; membrane; integral component of membrane; Golgi apparatus; extracellular space; cell projection; extracellular region; perinuclear region of cytoplasm; cytoplasmic vesicle; smooth endoplasmic reticulum; clathrin-coated pit; cell surface; endosome; early endosome; rough endoplasmic reticulum; Golgi-associated vesicle; cell-cell junction; synaptic vesicle; COPII…
STK17A	6.72899e-37	0.506937	0.437	0.221	2.46288e-32	protein phosphorylation; phosphorylation; apoptotic process; positive regulation of apoptotic process; intracellular signal transduction; positive regulation of fibroblast apoptotic process; regulation of reactive oxygen species metabolic process	nucleotide binding; protein kinase activity; protein serine/threonine kinase activity; ATP binding; kinase activity; transferase activity	nucleus; nuclear speck; plasma membrane
DLX1	1.53131e-36	0.289327	0.117	0.011	5.60475e-32	regulation of transcription, DNA-templated; multicellular organism development; cell differentiation; regulation of transcription by RNA polymerase II; negative regulation of transcription by RNA polymerase II; positive regulation of transcription by RNA polymerase II; positive regulation of cell differentiation; cellular response to transforming growth factor beta stimulus; negative regulation o…	DNA binding; sequence-specific DNA binding; DNA-binding transcription factor activity; protein binding; RNA polymerase II proximal promoter sequence-specific DNA binding; DNA-binding transcription factor activity, RNA polymerase II-specific; RNA polymerase II regulatory region sequence-specific DNA binding; chromatin binding	nucleus; nuclear chromatin
TUBA1B	4.87259e-36	-0.462475	0.949	0.985	1.78342e-31	microtubule-based process; microtubule cytoskeleton organization; mitotic cell cycle; cytoskeleton-dependent intracellular transport; cell division; cellular response to interleukin-4; cytoskeleton organization	nucleotide binding; GTPase activity; GTP binding; protein binding; structural constituent of cytoskeleton; ubiquitin protein ligase binding; double-stranded RNA binding; structural molecule activity	cytoplasm; microtubule cytoskeleton; cytoskeleton; microtubule; cytoplasmic microtubule; membrane raft
RPL13A	2.64455e-35	0.229004	1	1	9.67931e-31	translation; regulation of translation; negative regulation of translation; cellular response to interferon-gamma; viral transcription; translational initiation; nuclear-transcribed mRNA catabolic process, nonsense-mediated decay; SRP-dependent cotranslational protein targeting to membrane; negative regulation of formation of translation preinitiation complex	RNA binding; structural constituent of ribosome; mRNA binding	nucleus; cytoplasm; membrane; ribosome; large ribosomal subunit; nucleolus; focal adhesion; cytosolic large ribosomal subunit; cytosol; ribonucleoprotein complex; GAIT complex
MAP1B	4.4074e-35	-0.312839	0.99	0.995	1.61315e-30	nervous system development; microtubule cytoskeleton organization; dendrite development; axonogenesis; cellular process; axon extension; microtubule bundle formation; neuron migration; negative regulation of microtubule depolymerization; synapse assembly; response to wounding; response to mechanical stimulus; response to carbohydrate; response to inorganic substance; peripheral nervous system axo…	microtubule binding; protein binding; tubulin binding; actin binding; structural molecule activity; phospholipid binding; protein-containing complex binding	microtubule; neuronal cell body; cytoplasm; cytosol; cytoskeleton; cell projection; cell junction; synapse; dendritic spine; dendrite; microtubule associated complex; axon; somatodendritic compartment; basal dendrite; photoreceptor outer segment; plasma membrane; postsynaptic density; growth cone; varicosity; perikaryon; perinuclear region of cytoplasm; apical dendrite; hippocampal mossy fiber
NFIA	8.36728e-35	-0.473708	0.569	0.772	3.06251e-30	regulation of transcription, DNA-templated; DNA replication; positive regulation of transcription by RNA polymerase II; negative regulation of transcription by RNA polymerase II; viral genome replication; synapse maturation; ureter development	DNA binding; DNA-binding transcription factor activity; DNA-binding transcription factor activity, RNA polymerase II-specific; RNA polymerase II proximal promoter sequence-specific DNA binding; DNA-binding transcription activator activity, RNA polymerase II-specific; transcription factor binding; chromatin binding	nucleus; nucleoplasm; cell junction; intracellular; nuclear chromatin
NR2F2	5.26782e-34	-0.427067	0.095	0.293	1.92807e-29	negative regulation of endothelial cell proliferation; negative regulation of endothelial cell migration; positive regulation of transcription, DNA-templated; regulation of transcription, DNA-templated; intracellular receptor signaling pathway; steroid hormone mediated signaling pathway; cell differentiation; regulation of transcription by RNA polymerase II; negative regulation of transcription b…	zinc ion binding; metal ion binding; DNA binding; DNA-binding transcription factor activity; protein homodimerization activity; sequence-specific DNA binding; protein binding; steroid hormone receptor activity; RNA polymerase II regulatory region sequence-specific DNA binding; DNA-binding transcription factor activity, RNA polymerase II-specific; transcription corepressor activity; nuclear recept…	nucleus; cytosol; nucleoplasm
EMP3	8.43523e-34	-0.376124	0.199	0.428	3.08738e-29	cell growth; cell death; bleb assembly	protein binding	membrane; integral component of membrane; plasma membrane
OTX2	1.35034e-33	0.167846	0.111	0.011	4.94237e-29	regulation of transcription, DNA-templated; multicellular organism development; positive regulation of transcription, DNA-templated; positive regulation of transcription by RNA polymerase II; axon guidance; protein-containing complex assembly; positive regulation of embryonic development; dopaminergic neuron differentiation; midbrain development; regulation of smoothened signaling pathway; forebr…	DNA binding; DNA-binding transcription factor activity; sequence-specific DNA binding; protein binding; DNA-binding transcription factor activity, RNA polymerase II-specific; RNA polymerase II proximal promoter sequence-specific DNA binding; DNA-binding transcription activator activity, RNA polymerase II-specific; eukaryotic initiation factor 4E binding	nucleus; nuclear chromatin; growth cone; protein-containing complex
PPA1	2.11408e-33	-0.365329	0.857	0.931	7.73775e-29	phosphate-containing compound metabolic process; tRNA aminoacylation for protein translation; diphosphate metabolic process	metal ion binding; magnesium ion binding; hydrolase activity; inorganic diphosphatase activity; pyrophosphatase activity	cytoplasm; cytosol; extracellular exosome
NASP	5.73299e-33	-0.467515	0.834	0.92	2.09833e-28	protein transport; cell cycle; DNA replication; cell population proliferation; DNA replication-dependent nucleosome assembly; DNA replication-independent nucleosome assembly; CENP-A containing nucleosome assembly; histone exchange; G1/S transition of mitotic cell cycle; blastocyst development; male gonad development; response to testosterone	protein binding; histone binding	nucleoplasm; nucleus; cytoplasm; nuclear chromatin; protein-containing complex
LHX2	5.95747e-33	-0.409479	0.796	0.913	2.18049e-28	regulation of transcription, DNA-templated; positive regulation of transcription, DNA-templated; neuron differentiation; positive regulation of transcription by RNA polymerase II; neural tube closure; hair follicle development; nervous system development; axon guidance; brain development; mesoderm development; dorsal/ventral pattern formation; telencephalon development; olfactory bulb development…	metal ion binding; DNA binding; sequence-specific DNA binding; DNA-binding transcription factor activity, RNA polymerase II-specific; RNA polymerase II regulatory region sequence-specific DNA binding; RNA polymerase II proximal promoter sequence-specific DNA binding; DNA-binding transcription activator activity, RNA polymerase II-specific; chromatin binding; transcription factor binding	nucleus; nuclear chromatin
ACTR3B	1.30906e-32	-0.425946	0.168	0.379	4.79129e-28	actin filament organization; Arp2/3 complex-mediated actin nucleation	nucleotide binding; ATP binding; actin binding; actin filament binding	cytoplasm; cytoskeleton; cell projection; Arp2/3 protein complex; extracellular exosome
SYNE2	2.34542e-32	-0.422651	0.898	0.958	8.58447e-28	cytoskeletal anchoring at nuclear membrane; positive regulation of cell migration; nuclear migration; centrosome localization; nuclear migration along microfilament; nucleokinesis involved in cell motility in cerebral cortex radial glia guided migration; regulation of cilium assembly	actin binding; actin filament binding; protein binding	nucleus; cytoplasm; membrane; integral component of membrane; mitochondrion; nuclear membrane; intermediate filament cytoskeleton; plasma membrane; cytoskeleton; aggresome; meiotic nuclear membrane microtubule tethering complex; cell junction; nucleoplasm; focal adhesion; nuclear envelope; extracellular exosome; sarcoplasmic reticulum; Z disc; sarcoplasmic reticulum membrane; filopodium membrane;…
OLFM3	2.9915e-32	-0.370458	0.059	0.237	1.09492e-27	eye photoreceptor cell development	protein binding	extracellular region; cell junction; synapse; extracellular space; Golgi apparatus; AMPA glutamate receptor complex
NES	7.90706e-32	0.556506	0.774	0.643	2.89406e-27	multicellular organism development; nervous system development; positive regulation of neural precursor cell proliferation; brain development; negative regulation of protein binding; negative regulation of catalytic activity; central nervous system development; G2/M transition of mitotic cell cycle; stem cell proliferation; embryonic camera-type eye development; positive regulation of intermediat…	protein binding; intermediate filament binding	intermediate filament cytoskeleton; intermediate filament; cytoplasm
PHLDA1	2.7133e-31	-0.407568	0.299	0.528	9.93096e-27	apoptotic process; G2/M transition of mitotic cell cycle; positive regulation of apoptotic process; FasL biosynthetic process	protein binding	nucleus; nucleolus; cytoplasm; cytoplasmic vesicle; cytosol
RPL9	9.00877e-31	0.23355	0.999	1	3.2973e-26	translation; cytoplasmic translation; viral transcription; translational initiation; nuclear-transcribed mRNA catabolic process, nonsense-mediated decay; SRP-dependent cotranslational protein targeting to membrane	structural constituent of ribosome; protein binding; rRNA binding; RNA binding	nucleus; membrane; ribosome; focal adhesion; cytosolic large ribosomal subunit; cytosol; intracellular; integral component of membrane
TCF4	1.22978e-30	-0.430505	0.729	0.857	4.50111e-26	positive regulation of transcription by RNA polymerase II; cell differentiation; positive regulation of transcription, DNA-templated; nervous system development; positive regulation of neuron differentiation; DNA-templated transcription, initiation; transcription initiation from RNA polymerase II promoter; protein-DNA complex assembly; negative regulation of transcription by RNA polymerase II; re…	protein dimerization activity; DNA binding; DNA-binding transcription factor activity; protein binding; identical protein binding; RNA polymerase II proximal promoter sequence-specific DNA binding; DNA-binding transcription factor activity, RNA polymerase II-specific; DNA-binding transcription activator activity, RNA polymerase II-specific; protein C-terminus binding; protein heterodimerization a…	nucleus; nuclear chromatin; transcription factor complex; beta-catenin-TCF complex; beta-catenin-TCF7L2 complex
STRA6	1.50946e-30	-0.346843	0.115	0.303	5.52476e-26	retinoid metabolic process; embryonic digestive tract development; camera-type eye development; blood vessel development; heart development; lung development; lung vasculature development; ductus arteriosus closure; kidney development; pulmonary valve morphogenesis; ventricular septum development; learning; feeding behavior; adrenal gland development; female genitalia development; retinol transpo…	signaling receptor activity; retinol transmembrane transporter activity; retinal binding; retinol binding	membrane; integral component of membrane; plasma membrane; integral component of plasma membrane; protein-containing complex
DMRTA2	9.94698e-30	-0.357301	0.239	0.465	3.6407e-25	regulation of transcription, DNA-templated; regulation of transcription by RNA polymerase II; positive regulation of neuroblast proliferation; cerebral cortex regionalization; skeletal muscle cell differentiation; neuron fate specification; dopaminergic neuron differentiation	metal ion binding; DNA binding; DNA-binding transcription factor activity; sequence-specific DNA binding; DNA-binding transcription factor activity, RNA polymerase II-specific; protein homodimerization activity; protein binding; protein heterodimerization activity	nucleus; nuclear chromatin
COL11A1	1.53277e-29	-0.421617	0.51	0.692	5.6101e-25	extracellular matrix organization; visual perception; sensory perception of sound; collagen fibril organization; endodermal cell differentiation; detection of mechanical stimulus involved in sensory perception of sound; cartilage condensation; ossification; chondrocyte development; heart morphogenesis; proteoglycan metabolic process; tendon development; inner ear morphogenesis; embryonic skeletal…	metal ion binding; extracellular matrix structural constituent; extracellular matrix binding; extracellular matrix structural constituent conferring tensile strength; protein binding, bridging; heparin binding; heparan sulfate binding	extracellular region; collagen trimer; extracellular space; extracellular matrix; collagen-containing extracellular matrix; endoplasmic reticulum lumen; collagen type XI trimer
SQLE	2.03007e-29	-0.536045	0.807	0.886	7.43027e-25	oxidation-reduction process; sterol biosynthetic process; regulation of cell population proliferation; lipid droplet formation; regulation of cholesterol biosynthetic process; cholesterol metabolic process; cholesterol biosynthetic process; cellular aromatic compound metabolic process; response to organic substance	flavin adenine dinucleotide binding; squalene monooxygenase activity; oxidoreductase activity; protein binding; FAD binding	membrane; integral component of membrane; endoplasmic reticulum; endoplasmic reticulum membrane; organelle membrane; intracellular membrane-bounded organelle
NTRK2	5.67166e-29	0.238902	0.15	0.034	2.07588e-24	positive regulation of protein phosphorylation; protein phosphorylation; phosphorylation; transmembrane receptor protein tyrosine kinase signaling pathway; peptidyl-tyrosine phosphorylation; multicellular organism development; cell differentiation; nervous system development; positive regulation of gene expression; positive regulation of MAPK cascade; cerebral cortex development; positive regulat…	nucleotide binding; protein kinase activity; ATP binding; kinase activity; transferase activity; protein tyrosine kinase activity; transmembrane receptor protein tyrosine kinase activity; protein homodimerization activity; protein binding; neurotrophin receptor activity; neurotrophin binding; brain-derived neurotrophic factor binding; brain-derived neurotrophic factor-activated receptor activity	cytoplasm; membrane; integral component of membrane; integral component of plasma membrane; plasma membrane; cell projection; perinuclear region of cytoplasm; cell junction; synapse; postsynaptic membrane; dendrite; endosome; early endosome; receptor complex; axon; early endosome membrane; endosome membrane; postsynaptic density; Golgi membrane; axon terminus; dendritic spine; cytosol; terminal b…
TNC	8.93743e-29	0.468314	0.313	0.145	3.27119e-24	cell adhesion; regulation of cell population proliferation; cellular protein metabolic process; post-translational protein modification; extracellular matrix organization; osteoblast differentiation; response to wounding; negative regulation of cell adhesion; neuromuscular junction development; positive regulation of cell population proliferation; response to mechanical stimulus; positive regulat…	protein binding; extracellular matrix structural constituent; syndecan binding	extracellular space; membrane; extracellular region; collagen-containing extracellular matrix; focal adhesion; endoplasmic reticulum lumen; basement membrane; interstitial matrix; extracellular matrix; perisynaptic extracellular matrix
MEST	9.638e-29	0.472309	0.575	0.387	3.5276e-24	mesoderm development; regulation of lipid storage	hydrolase activity; catalytic activity	membrane; integral component of membrane; endoplasmic reticulum; endoplasmic reticulum membrane; extracellular exosome
PPIA	2.016e-28	-0.276451	0.992	0.994	7.37875e-24	protein peptidyl-prolyl isomerization; protein folding; leukocyte migration; protein refolding; viral life cycle; viral process; neutrophil degranulation; interleukin-12-mediated signaling pathway; positive regulation of protein secretion; positive regulation of viral genome replication; viral release from host cell; establishment of integrated proviral latency; fusion of virus membrane with host…	isomerase activity; peptidyl-prolyl cis-trans isomerase activity; RNA binding; protein binding; cyclosporin A binding; unfolded protein binding; virion binding	nucleus; cytoplasm; membrane; extracellular space; cytosol; extracellular region; focal adhesion; extracellular exosome; protein-containing complex; secretory granule lumen; ficolin-1-rich granule lumen; vesicle
SLCO5A1	2.24049e-28	-0.312656	0.134	0.327	8.20041e-24	transmembrane transport; sodium-independent organic anion transport	sodium-independent organic anion transmembrane transporter activity; protein binding; transporter activity	membrane; integral component of membrane; plasma membrane; integral component of plasma membrane
HNRNPA2B1	3.27957e-28	-0.313196	0.976	0.989	1.20035e-23	mRNA processing; RNA splicing; mRNA transport; mRNA export from nucleus; mRNA splicing, via spliceosome; interleukin-12-mediated signaling pathway; RNA metabolic process; primary miRNA processing; G-quadruplex DNA unwinding; RNA transport; positive regulation of telomere maintenance via telomere lengthening; positive regulation of telomerase RNA reverse transcriptase activity; miRNA transport; ne…	nucleic acid binding; RNA binding; protein binding; mRNA binding; mRNA 3'-UTR binding; N6-methyladenosine-containing RNA binding; miRNA binding; G-rich strand telomeric DNA binding; single-stranded telomeric DNA binding; pre-mRNA intronic binding	nucleus; cytoplasm; membrane; nucleoplasm; spliceosomal complex; extracellular region; catalytic step 2 spliceosome; extracellular exosome; ribonucleoprotein complex; chromosome, telomeric region; nuclear matrix; Cajal body
ZNF428	3.46556e-28	-0.344277	0.778	0.876	1.26843e-23		nucleic acid binding; metal ion binding
AL136366.1	4.86199e-28	-0.227606	0.014	0.145	1.77954e-23
LEMD1	6.44181e-28	0.282495	0.249	0.098	2.35777e-23			membrane; integral component of membrane
RASGRP1	7.33437e-28	-0.336299	0.147	0.343	2.68445e-23	intracellular signal transduction; small GTPase mediated signal transduction; cell differentiation; positive regulation of GTPase activity; positive regulation of protein phosphorylation; MAPK cascade; positive regulation of ERK1 and ERK2 cascade; signal transduction; positive regulation of interferon-gamma secretion; protein complex oligomerization; Ras protein signal transduction; positive regu…	metal ion binding; calcium ion binding; zinc ion binding; protein homodimerization activity; guanyl-nucleotide exchange factor activity; phosphatidylcholine binding; phosphatidylserine binding; Ras guanyl-nucleotide exchange factor activity; lipid binding; diacylglycerol binding	cytoplasm; membrane; cytosol; endoplasmic reticulum; endoplasmic reticulum membrane; Golgi apparatus; plasma membrane; Golgi membrane; mast cell granule; intracellular
FBXO16	7.85058e-28	0.251668	0.238	0.09	2.87339e-23		protein binding
HEY1	1.33369e-27	-0.385537	0.289	0.502	4.88145e-23	positive regulation of gene expression; positive regulation of transcription by RNA polymerase II; ventricular septum morphogenesis; negative regulation of Notch signaling pathway; regulation of transcription, DNA-templated; multicellular organism development; Notch signaling pathway; cell differentiation; negative regulation of transcription by RNA polymerase II; anterior/posterior pattern speci…	protein dimerization activity; DNA binding; DNA-binding transcription factor activity; RNA polymerase II regulatory region sequence-specific DNA binding; protein binding; DNA-binding transcription factor activity, RNA polymerase II-specific; DNA-binding transcription repressor activity, RNA polymerase II-specific; transcription factor binding	nucleus; cytoplasm; nuclear chromatin; nucleoplasm
VIM	2.07926e-27	0.320811	0.998	0.997	7.61031e-23	positive regulation of translation; cellular response to lipopolysaccharide; viral process; cytokine-mediated signaling pathway; muscle filament sliding; cellular response to muramyl dipeptide; positive regulation of gene expression; negative regulation of neuron projection development; astrocyte development; positive regulation of collagen biosynthetic process; regulation of mRNA stability; inte…	protein binding; identical protein binding; structural constituent of cytoskeleton; protein domain specific binding; scaffold protein binding; double-stranded RNA binding; structural constituent of eye lens; keratin filament binding	cytoplasm; nucleus; cytosol; cytoskeleton; intermediate filament; focal adhesion; peroxisome; extracellular exosome; ribonucleoprotein complex; nuclear matrix; polysome; plasma membrane; cell leading edge; cell projection; neuron projection; phagocytic vesicle
WWTR1	2.74761e-27	0.209198	0.143	0.034	1.00565e-22	negative regulation of canonical Wnt signaling pathway; negative regulation of protein kinase activity; positive regulation of transcription by RNA polymerase II; hippo signaling; positive regulation of cell population proliferation; regulation of transcription, DNA-templated; transcription initiation from RNA polymerase II promoter; positive regulation of epithelial to mesenchymal transition; ne…	protein binding; transcription coactivator activity; transcription corepressor activity; protein homodimerization activity	cytoplasm; nucleus; cytosol; nucleoplasm; nuclear body; transcription factor complex
MT2A	3.15586e-27	-0.516038	0.283	0.476	1.15508e-22	cellular copper ion homeostasis; cellular response to drug; interferon-gamma-mediated signaling pathway; negative regulation of growth; cellular zinc ion homeostasis; response to metal ion; detoxification of copper ion; cellular response to interleukin-3; cellular response to erythropoietin; cellular response to cadmium ion; cellular response to copper ion; cellular response to zinc ion	metal ion binding; zinc ion binding; protein binding; drug binding	nucleus; cytoplasm; perinuclear region of cytoplasm; cytosol
MDFI	3.16451e-27	-0.329647	0.129	0.313	1.15824e-22	multicellular organism development; cell differentiation; negative regulation of transcription by RNA polymerase II; negative regulation of Wnt signaling pathway; cytoplasmic sequestering of transcription factor; negative regulation of DNA binding; dorsal/ventral axis specification; embryonic skeletal system morphogenesis; trophoblast giant cell differentiation	protein binding; identical protein binding; transcription factor binding	nucleus; cytoplasm
DOK5	5.47123e-27	-0.358985	0.631	0.811	2.00253e-22	axon guidance; transmembrane receptor protein tyrosine kinase signaling pathway; neuron differentiation; positive regulation of MAPK cascade; regulation of neurotrophin TRK receptor signaling pathway		cytosol
DNAJC1	1.2658e-26	0.470581	0.618	0.466	4.63295e-22	positive regulation of ATPase activity; negative regulation of proteolysis; regulation of protein secretion; regulation of translation; protein folding	DNA binding; protein binding; ATPase activator activity; chaperone binding	nucleus; membrane; integral component of membrane; endoplasmic reticulum; endoplasmic reticulum membrane; organelle membrane; intracellular membrane-bounded organelle; nuclear membrane; plasma membrane
CMTM8	2.41903e-26	0.303567	0.307	0.148	8.8539e-22	signal transduction; chemotaxis; myelination	cytokine activity; structural constituent of myelin sheath	nucleus; cytoplasm; membrane; integral component of membrane; nucleoplasm; extracellular space
HMGN3	4.34412e-26	-0.31084	0.934	0.973	1.58999e-21	chromatin organization; positive regulation of transcription by RNA polymerase II; regulation of insulin secretion involved in cellular response to glucose stimulus; regulation of transcription by RNA polymerase II; positive regulation of DNA-binding transcription factor activity	DNA binding; nucleosomal DNA binding; chromatin binding; thyroid hormone receptor binding	nucleus; cytosol; nucleoplasm; chromatin
MGST1	5.25523e-26	-0.410595	0.176	0.356	1.92346e-21	oxidation-reduction process; cellular oxidant detoxification; glutathione metabolic process; xenobiotic metabolic process; neutrophil degranulation; glutathione derivative biosynthetic process; protein homotrimerization; cellular response to lipid hydroperoxide; response to organonitrogen compound; response to lipopolysaccharide; Leydig cell differentiation; response to drug	transferase activity; protein binding; glutathione transferase activity; glutathione peroxidase activity; identical protein binding; protein homodimerization activity; glutathione binding	membrane; integral component of membrane; endoplasmic reticulum; endoplasmic reticulum membrane; intracellular membrane-bounded organelle; mitochondrion; mitochondrial outer membrane; plasma membrane; peroxisomal membrane; azurophil granule membrane; nucleus; apical part of cell
FAT3	1.26076e-25	0.400483	0.409	0.238	4.61451e-21	cell adhesion; homophilic cell adhesion via plasma membrane adhesion molecules; multicellular organism development; cell-cell adhesion	calcium ion binding	membrane; integral component of membrane; plasma membrane
RPS11	2.94075e-25	0.206229	0.999	0.999	1.07634e-20	translation; viral transcription; translational initiation; nuclear-transcribed mRNA catabolic process, nonsense-mediated decay; SRP-dependent cotranslational protein targeting to membrane	RNA binding; structural constituent of ribosome; protein binding; rRNA binding	cytoplasm; membrane; ribosome; cytosolic small ribosomal subunit; nucleolus; focal adhesion; nucleoplasm; cytosol; extracellular exosome; intracellular
TUBA1A	4.03348e-25	-0.269807	0.998	0.998	1.47629e-20	microtubule-based process; microtubule cytoskeleton organization; mitotic cell cycle; G2/M transition of mitotic cell cycle; regulation of G2/M transition of mitotic cell cycle; ciliary basal body-plasma membrane docking; cytoskeleton-dependent intracellular transport; cell division; regulation of synapse organization; cytoskeleton organization	nucleotide binding; GTPase activity; GTP binding; protein binding; structural constituent of cytoskeleton; structural molecule activity; protein domain specific binding	nucleus; cytoplasm; microtubule cytoskeleton; cytoskeleton; microtubule; cytosol; extracellular exosome; recycling endosome; cytoplasmic ribonucleoprotein granule; cytoplasmic microtubule; neuromuscular junction; myelin sheath; membrane raft
DSTN	4.14771e-25	-0.33404	0.778	0.882	1.5181e-20	actin filament severing; actin filament depolymerization; positive regulation of actin filament depolymerization; actin polymerization or depolymerization; actin filament fragmentation	actin binding; protein binding; actin filament binding	actin cytoskeleton; extracellular exosome; cytoplasm; cortical actin cytoskeleton; intracellular
EMX1	5.08637e-25	-0.340102	0.217	0.42	1.86166e-20	regulation of transcription, DNA-templated; multicellular organism development; negative regulation of transcription by RNA polymerase II; neuron differentiation; regulation of transcription by RNA polymerase II; central nervous system development; brain development; in utero embryonic development; post-embryonic development; telencephalon development; cerebral cortex regionalization; cerebral co…	DNA binding; sequence-specific DNA binding; protein binding; RNA polymerase II proximal promoter sequence-specific DNA binding; DNA-binding transcription factor activity, RNA polymerase II-specific; DNA-binding transcription repressor activity, RNA polymerase II-specific; RNA polymerase II intronic transcription regulatory region sequence-specific DNA binding	nucleus; cytoplasm; nucleolus; nuclear chromatin
TLE2	6.23812e-25	-0.162134	0.003	0.111	2.28322e-20	regulation of transcription, DNA-templated; Wnt signaling pathway; negative regulation of canonical Wnt signaling pathway; signal transduction; negative regulation of transcription, DNA-templated; beta-catenin-TCF complex assembly; animal organ morphogenesis	protein binding; transcription corepressor activity; repressing transcription factor binding	nucleus; focal adhesion; extracellular space; nuclear body; transcription factor complex; nucleoplasm
PHIP	9.02342e-25	-0.346003	0.749	0.862	3.30266e-20	negative regulation of apoptotic process; insulin receptor signaling pathway; positive regulation of transcription, DNA-templated; regulation of transcription by RNA polymerase II; cytoskeleton organization; regulation of cell morphogenesis; regulation of cell shape; positive regulation of cell population proliferation; positive regulation of transcription by RNA polymerase II; positive regulatio…	insulin receptor binding; protein binding; lysine-acetylated histone binding	nucleus
B3GAT2	1.0518e-24	-0.37613	0.261	0.459	3.8497e-20	protein glycosylation; glycosaminoglycan metabolic process; chondroitin sulfate proteoglycan biosynthetic process	metal ion binding; transferase activity; galactosylgalactosylxylosylprotein 3-beta-glucuronosyltransferase activity	membrane; integral component of membrane; Golgi apparatus; Golgi membrane
PRCP	1.5854e-24	0.443648	0.334	0.177	5.80273e-20	proteolysis; neutrophil degranulation; blood coagulation, intrinsic pathway; negative regulation of systemic arterial blood pressure; regulation of blood vessel endothelial cell migration; angiogenesis involved in wound healing; regulation of thyroid hormone mediated signaling pathway; plasma kallikrein-kinin cascade; glucose homeostasis; energy homeostasis; regulation of reactive oxygen species …	hydrolase activity; protein binding; peptidase activity; serine-type peptidase activity; carboxypeptidase activity; dipeptidyl-peptidase activity; serine-type carboxypeptidase activity	lysosome; plasma membrane; extracellular exosome; azurophil granule membrane; ficolin-1-rich granule membrane; basal part of cell
RDH10	1.84336e-24	0.185847	0.132	0.032	6.74688e-20	oxidation-reduction process; metanephros development; in utero embryonic development; retinoic acid biosynthetic process; gonad development; animal organ morphogenesis; neural crest cell development; embryonic camera-type eye development; embryonic forelimb morphogenesis; retinol metabolic process; ear development; nose development; embryonic organ development; embryonic viscerocranium morphogene…	oxidoreductase activity; retinol dehydrogenase activity; NADP-retinol dehydrogenase activity	cytoplasm; membrane; integral component of membrane; endoplasmic reticulum; endoplasmic reticulum membrane; organelle membrane; intracellular membrane-bounded organelle; lipid droplet
FABP5	1.93132e-24	-0.366563	0.825	0.907	7.06882e-20	triglyceride catabolic process; neutrophil degranulation; glucose metabolic process; lipid metabolic process; phosphatidylcholine biosynthetic process; negative regulation of glucose transmembrane transport; regulation of prostaglandin biosynthetic process; positive regulation of peroxisome proliferator activated receptor signaling pathway; glucose homeostasis; regulation of sensory perception of…	lipid binding; protein binding; identical protein binding; retinoic acid binding; fatty acid binding	nucleus; cytoplasm; membrane; plasma membrane; extracellular region; cell junction; synapse; postsynaptic membrane; nucleoplasm; cytosol; extracellular exosome; postsynaptic density; extracellular space; secretory granule membrane; azurophil granule lumen
TUBB	4.41483e-24	-0.341929	0.913	0.953	1.61587e-19	microtubule-based process; microtubule cytoskeleton organization; mitotic cell cycle; G2/M transition of mitotic cell cycle; regulation of G2/M transition of mitotic cell cycle; ciliary basal body-plasma membrane docking; neutrophil degranulation; cellular process; cytoskeleton-dependent intracellular transport; natural killer cell mediated cytotoxicity; regulation of synapse organization; spindl…	nucleotide binding; GTPase activity; GTP binding; protein binding; structural constituent of cytoskeleton; ubiquitin protein ligase binding; MHC class I protein binding; structural molecule activity; protein domain specific binding; GTPase activating protein binding; protein-containing complex binding	nucleus; cytoplasm; cytoskeleton; microtubule; extracellular region; extracellular exosome; azurophil granule lumen; cytoplasmic ribonucleoprotein granule; nuclear envelope lumen; protein-containing complex; cell body; membrane raft
HIST1H4C	6.5922e-24	-0.32187	0.513	0.687	2.41281e-19	nucleosome assembly; DNA-templated transcription, initiation; cellular protein metabolic process; regulation of gene silencing by miRNA; CENP-A containing nucleosome assembly; regulation of megakaryocyte differentiation; DNA replication-dependent nucleosome assembly; DNA replication-independent nucleosome assembly; chromatin silencing at rDNA; negative regulation of gene expression, epigenetic; p…	RNA binding; DNA binding; protein heterodimerization activity; protein binding; protein domain specific binding	nucleus; membrane; nucleosome; chromosome; extracellular region; nucleoplasm; extracellular exosome; protein-containing complex; nuclear chromosome, telomeric region; nuclear chromosome; nuclear nucleosome
LINC01159	6.70902e-24	0.320855	0.398	0.227	2.45557e-19
ABCA1	1.4102e-23	0.253913	0.222	0.088	5.16146e-19	cholesterol homeostasis; cellular response to low-density lipoprotein particle stimulus; transmembrane transport; lipid metabolic process; steroid metabolic process; cholesterol metabolic process; regulation of Cdc42 protein signal transduction; response to laminar fluid shear stress; cholesterol efflux; regulation of lipid metabolic process; lipid transport; high-density lipoprotein particle ass…	nucleotide binding; ATP binding; protein binding; ATPase activity; ATPase-coupled transmembrane transporter activity; ATPase-coupled intramembrane lipid transporter activity; lipid transporter activity; phosphatidylcholine binding; ATPase binding; signaling receptor binding; cholesterol binding; phospholipid transporter activity; high-density lipoprotein particle binding; syntaxin binding; small …	perinuclear region of cytoplasm; membrane; integral component of membrane; plasma membrane; endosome; intracellular membrane-bounded organelle; endoplasmic reticulum membrane; integral component of plasma membrane; membrane raft; Golgi apparatus; external side of plasma membrane; cell surface; endocytic vesicle; phagocytic vesicle
FGFBP3	1.95792e-23	-0.452536	0.526	0.686	7.16619e-19	cell-cell signaling; positive regulation of vascular permeability; positive regulation of fibroblast growth factor receptor signaling pathway	heparin binding; growth factor binding; fibroblast growth factor binding	extracellular region; collagen-containing extracellular matrix
TLE5	2.62742e-23	-0.329922	0.592	0.731	9.61661e-19	regulation of transcription, DNA-templated; Wnt signaling pathway; negative regulation of canonical Wnt signaling pathway; negative regulation of gene expression; multicellular organism development; negative regulation of transcription by RNA polymerase II; negative regulation of transcription, DNA-templated; animal organ morphogenesis; negative regulation of protein binding; response to interleu…	protein binding; transcription corepressor activity; repressing transcription factor binding	nucleus; transcription factor complex
KCNQ3	3.1222e-23	-0.285138	0.093	0.249	1.14276e-18	transmembrane transport; ion transport; potassium ion transport; regulation of ion transmembrane transport; potassium ion transmembrane transport; chemical synaptic transmission; membrane hyperpolarization	ion channel activity; voltage-gated ion channel activity; voltage-gated potassium channel activity; potassium channel activity; delayed rectifier potassium channel activity; calmodulin binding; protein binding	membrane; integral component of membrane; voltage-gated potassium channel complex; plasma membrane; integral component of plasma membrane; cell surface; node of Ranvier; axon initial segment
AUTS2	4.26788e-23	-0.325975	0.319	0.503	1.56209e-18	positive regulation of transcription by RNA polymerase II; positive regulation of lamellipodium assembly; actin cytoskeleton reorganization; neuron migration; axon extension; dendrite extension; positive regulation of Rac protein signal transduction; positive regulation of histone H3-K4 methylation; positive regulation of histone H4-K16 acetylation	protein binding; chromatin binding	nucleus; cytoplasm; cytoskeleton; cell projection; growth cone; actin cytoskeleton
HMGCS1	5.72004e-23	-0.565321	0.775	0.85	2.09359e-18	lipid metabolic process; liver development; steroid biosynthetic process; brain development; steroid metabolic process; isoprenoid biosynthetic process; male gonad development; response to low light intensity stimulus; response to hormone; response to organic substance; response to organic cyclic compound; response to purine-containing compound; sterol biosynthetic process; response to vitamin E;…	transferase activity; catalytic activity; protein homodimerization activity; hydroxymethylglutaryl-CoA synthase activity; drug binding; isomerase activity; organic acid binding	cytoplasm; cytosol
KIF21A	7.58441e-23	-0.310245	0.777	0.881	2.77597e-18	microtubule-based movement	nucleotide binding; ATP binding; motor activity; microtubule motor activity; microtubule binding; protein binding; ATPase activity	cytosol; plasma membrane; cytoplasm; cytoskeleton; microtubule; kinesin complex
CLU	2.07293e-22	0.434182	0.875	0.839	7.58713e-18	positive regulation of gene expression; apoptotic process; immune system process; innate immune response; regulation of complement activation; protein stabilization; response to virus; positive regulation of apoptotic process; regulation of cell population proliferation; positive regulation of proteasomal ubiquitin-dependent protein catabolic process; positive regulation of NF-kappaB transcriptio…	protein binding; ubiquitin protein ligase binding; amyloid-beta binding; signaling receptor binding; tau protein binding; unfolded protein binding; chaperone binding; protein-containing complex binding; low-density lipoprotein particle receptor binding; misfolded protein binding	extracellular space; cytoplasm; nucleus; membrane; endoplasmic reticulum; intracellular membrane-bounded organelle; mitochondrial inner membrane; mitochondrion; cytosol; extracellular region; perinuclear region of cytoplasm; cytoplasmic vesicle; cell surface; mitochondrial membrane; extracellular exosome; collagen-containing extracellular matrix; blood microparticle; protein-containing complex; p…
SFRP2	2.41942e-22	0.336024	0.279	0.135	8.85531e-18	positive regulation of angiogenesis; negative regulation of cell population proliferation; positive regulation of apoptotic process; positive regulation of transcription by RNA polymerase II; outflow tract morphogenesis; positive regulation of canonical Wnt signaling pathway; multicellular organism development; Wnt signaling pathway; cell differentiation; branching involved in blood vessel morpho…	enzyme activator activity; Wnt-protein binding; receptor ligand activity; endopeptidase activator activity; integrin binding; fibronectin binding; protein binding	extracellular space; extracellular region; collagen-containing extracellular matrix
WNT7B	4.60349e-22	0.207016	0.149	0.045	1.68493e-17	multicellular organism development; Wnt signaling pathway; neuron differentiation; synapse organization; homeostatic process; cell fate commitment; cellular response to retinoic acid; positive regulation of JNK cascade; canonical Wnt signaling pathway; lens fiber cell development; in utero embryonic development; lung morphogenesis; positive regulation of osteoblast differentiation; embryonic plac…	signaling receptor binding; protein binding; frizzled binding; receptor ligand activity	extracellular region; extracellular space; plasma membrane; endoplasmic reticulum lumen; endocytic vesicle membrane; Golgi lumen; extracellular exosome; cytoplasm
PSAT1	5.20817e-22	0.340239	0.705	0.571	1.90624e-17	L-serine biosynthetic process; cellular amino acid biosynthetic process; pyridoxine biosynthetic process	transferase activity; catalytic activity; O-phospho-L-serine:2-oxoglutarate aminotransferase activity; transaminase activity	cytosol; extracellular exosome
LIFR	8.0474e-22	0.426765	0.51	0.348	2.94543e-17	positive regulation of cell population proliferation; cell surface receptor signaling pathway; cytokine-mediated signaling pathway; regulation of cytokine-mediated signaling pathway; response to cytokine; ciliary neurotrophic factor-mediated signaling pathway; oncostatin-M-mediated signaling pathway; leukemia inhibitory factor signaling pathway	protein binding; cytokine receptor activity; growth factor binding; ciliary neurotrophic factor receptor binding; cytokine binding; ciliary neurotrophic factor receptor activity; leukemia inhibitory factor receptor activity; oncostatin-M receptor activity	membrane; integral component of membrane; plasma membrane; extracellular region; external side of plasma membrane; receptor complex; extracellular exosome; integral component of plasma membrane
MT3	1.53235e-21	-0.366266	0.084	0.228	5.60857e-17	negative regulation of apoptotic process; energy reserve metabolic process; cholesterol catabolic process; zinc ion transport; cellular metal ion homeostasis; cellular zinc ion homeostasis; response to oxidative stress; brain development; negative regulation of autophagy; positive regulation of gene expression; positive regulation of cell death; astrocyte development; regulation of response to fo…	metal ion binding; zinc ion binding; protein binding; copper ion binding; drug binding; cysteine-type endopeptidase inhibitor activity involved in apoptotic process; protein kinase activator activity; antioxidant activity; cadmium ion binding	cytoplasm; perinuclear region of cytoplasm; extracellular space; mitochondrial outer membrane; rough endoplasmic reticulum; ribosome; microtubule; plasma membrane; synaptic vesicle; postsynaptic density; axon; dendritic spine; astrocyte projection; astrocyte end-foot; nucleus; cytosol; inclusion body
RPL3	1.87053e-21	0.180024	1	1	6.84631e-17	translation; ribosomal large subunit assembly; viral transcription; translational initiation; nuclear-transcribed mRNA catabolic process, nonsense-mediated decay; SRP-dependent cotranslational protein targeting to membrane; cellular response to interleukin-4	structural constituent of ribosome; RNA binding; protein binding; 5S rRNA binding	nucleolus; cytosol; ribosome; intracellular; nucleus; cytoplasm; focal adhesion; cytosolic large ribosomal subunit; extracellular exosome; protein-containing complex; synapse
PTX3	2.23938e-21	0.209748	0.175	0.062	8.19636e-17	innate immune response; neutrophil degranulation; inflammatory response; negative regulation of viral entry into host cell; negative regulation by host of viral exo-alpha-sialidase activity; negative regulation by host of viral glycoprotein metabolic process; negative regulation of exo-alpha-sialidase activity; negative regulation of glycoprotein metabolic process; ovarian cumulus expansion; resp…	protein binding; identical protein binding; complement component C1q binding; virion binding; (1->3)-beta-D-glucan binding	extracellular space; extracellular region; specific granule lumen; tertiary granule lumen; extracellular matrix
BST2	2.78608e-21	-0.262503	0.034	0.151	1.01973e-16	negative regulation of endopeptidase activity; defense response to virus; immune system process; innate immune response; regulation of actin cytoskeleton organization; response to virus; negative regulation of viral genome replication; neutrophil degranulation; positive regulation of I-kappaB kinase/NF-kappaB signaling; B cell activation; negative regulation of cell growth; type I interferon sign…	RNA binding; protein homodimerization activity; protein binding; identical protein binding; metalloendopeptidase inhibitor activity	cytoplasm; membrane; integral component of membrane; Golgi apparatus; cytosol; plasma membrane; membrane raft; cell surface; anchored component of membrane; endosome; extracellular exosome; late endosome; apical plasma membrane; azurophil granule membrane; multivesicular body
PANTR1	2.87746e-21	0.325223	0.957	0.917	1.05318e-16
H3F3A	3.75761e-21	-0.204305	0.998	0.999	1.37532e-16	nucleosome assembly; cellular protein metabolic process; regulation of gene silencing by miRNA; positive regulation of cell growth; regulation of megakaryocyte differentiation; DNA replication-independent nucleosome assembly; blood coagulation; chromatin silencing at rDNA; negative regulation of gene expression, epigenetic; telomere organization; osteoblast differentiation; nucleus organization; …	DNA binding; protein heterodimerization activity; protein binding; RNA polymerase II distal enhancer sequence-specific DNA binding; RNA polymerase II core promoter sequence-specific DNA binding; nucleosomal DNA binding	nucleus; nucleosome; chromosome; extracellular region; nucleoplasm; extracellular exosome; protein-containing complex; nuclear chromosome, telomeric region; nuclear chromosome; nuclear nucleosome; Barr body
STMN1	4.4595e-21	-0.274213	0.873	0.953	1.63222e-16	multicellular organism development; cell differentiation; nervous system development; regulation of microtubule polymerization or depolymerization; mitotic cytokinesis; axonogenesis; brain development; negative regulation of microtubule polymerization; positive regulation of cellular component movement; response to virus; microtubule depolymerization; neuron projection development; regulation of …	protein binding; tubulin binding	cytoplasm; cytoskeleton; microtubule; cytosol; membrane; neuron projection; extracellular exosome; intracellular
CD82	6.18608e-21	0.320919	0.294	0.154	2.26417e-16		protein binding	membrane; integral component of membrane; plasma membrane; integral component of plasma membrane; extracellular exosome
CD99	6.21594e-21	0.447944	0.813	0.752	2.2751e-16	cell adhesion; regulation of immune response; homotypic cell-cell adhesion; T cell extravasation; positive regulation of neutrophil extravasation	protein binding	membrane; integral component of membrane; focal adhesion; plasma membrane; integral component of plasma membrane; cytoplasm
NRXN3	7.60718e-21	0.250654	0.206	0.087	2.78431e-16	cell adhesion; axon guidance; learning; social behavior; neuron cell-cell adhesion; adult behavior; vocalization behavior; chemical synaptic transmission; neurotransmitter secretion; synapse assembly; regulation of synaptic vesicle exocytosis; angiogenesis; signal transduction	metal ion binding; signaling receptor activity; cell adhesion molecule binding; neuroligin family protein binding; calcium channel regulator activity; transmembrane signaling receptor activity	membrane; integral component of membrane; plasma membrane; integral component of plasma membrane; presynapse; protein-containing complex; GABA-ergic synapse
RPS3A	1.47826e-20	0.175829	0.999	0.999	5.4106e-16	translation; translational initiation; negative regulation of apoptotic process; cell differentiation; viral transcription; nuclear-transcribed mRNA catabolic process, nonsense-mediated decay; SRP-dependent cotranslational protein targeting to membrane	RNA binding; structural constituent of ribosome; protein binding; mRNA 5'-UTR binding	nucleus; cytoplasm; endoplasmic reticulum; nucleolus; cytosol; ribosome; cytosolic small ribosomal subunit; focal adhesion; nucleoplasm; extracellular exosome; ribonucleoprotein complex; intracellular
GRIP2	1.4999e-20	0.260555	0.276	0.137	5.48977e-16	positive regulation of signal transduction; neurotransmitter receptor transport, endosome to postsynaptic membrane; Notch signaling pathway; artery smooth muscle contraction; protein transport; positive regulation of blood pressure; vesicle-mediated transport in synapse	receptor signaling complex adaptor activity; protein binding	cytoplasm; membrane; plasma membrane; cytosol; postsynaptic density; dendrite; postsynaptic membrane; glutamatergic synapse
EIF1	2.3887e-20	0.303614	0.999	0.996	8.74288e-16	translational initiation; translation; regulation of translational initiation	translation initiation factor activity; RNA binding; protein binding; translation factor activity, RNA binding; ribosomal small subunit binding	nucleus; cytoplasm; eukaryotic 43S preinitiation complex
RPS20	3.74214e-20	0.185941	0.999	0.999	1.36966e-15	translation; viral transcription; translational initiation; nuclear-transcribed mRNA catabolic process, nonsense-mediated decay; SRP-dependent cotranslational protein targeting to membrane	RNA binding; structural constituent of ribosome; protein binding	cytoplasm; membrane; ribosome; small ribosomal subunit; cytosolic small ribosomal subunit; nucleoplasm; cytosol; extracellular exosome; intracellular
FXYD6	4.5805e-20	-0.296701	0.63	0.771	1.67651e-15	ion transport; regulation of ion transport; regulation of sodium ion transmembrane transporter activity; ion transmembrane transport; regulation of cardiac conduction	protein binding; ion channel regulator activity; sodium channel regulator activity	membrane; integral component of membrane; plasma membrane; glutamatergic synapse; integral component of postsynaptic membrane; integral component of presynaptic membrane
NFIC	5.37106e-20	-0.30124	0.222	0.388	1.96586e-15	regulation of transcription, DNA-templated; DNA replication; negative regulation of transcription by RNA polymerase II; positive regulation of transcription by RNA polymerase II; transcription by RNA polymerase II; odontogenesis of dentin-containing tooth; negative regulation of transcription, DNA-templated	DNA binding; DNA-binding transcription factor activity; DNA-binding transcription factor activity, RNA polymerase II-specific; RNA polymerase II proximal promoter sequence-specific DNA binding; DNA-binding transcription activator activity, RNA polymerase II-specific; proximal promoter sequence-specific DNA binding; double-stranded DNA binding	nucleus; intracellular; fibrillar center; nuclear chromatin
SCD	6.45154e-20	-0.381031	0.641	0.764	2.36133e-15	oxidation-reduction process; lipid metabolic process; fatty acid metabolic process; fatty acid biosynthetic process; unsaturated fatty acid biosynthetic process; positive regulation of cold-induced thermogenesis; regulation of cholesterol biosynthetic process; fatty-acyl-CoA biosynthetic process; response to fatty acid	metal ion binding; oxidoreductase activity; protein binding; iron ion binding; stearoyl-CoA 9-desaturase activity; oxidoreductase activity, acting on paired donors, with oxidation of a pair of donors resulting in the reduction of molecular oxygen to two molecules of water; palmitoyl-CoA 9-desaturase activity	membrane; integral component of membrane; endoplasmic reticulum; nucleolus; endoplasmic reticulum membrane; integral component of endoplasmic reticulum membrane
FAM181B	6.65183e-20	0.679206	0.585	0.465	2.43463e-15
TIMP3	8.59507e-20	-0.216177	0.04	0.157	3.14588e-15	negative regulation of ERK1 and ERK2 cascade; negative regulation of metalloendopeptidase activity; response to stimulus; negative regulation of peptidase activity; visual perception; negative regulation of endopeptidase activity; platelet degranulation; response to organic substance; response to hormone; response to cytokine; negative regulation of membrane protein ectodomain proteolysis; cellul…	metal ion binding; protein binding; metalloendopeptidase inhibitor activity; peptidase inhibitor activity; protease binding; enzyme inhibitor activity	nucleus; extracellular region; extracellular space; extracellular matrix; collagen-containing extracellular matrix; platelet dense granule lumen; basement membrane
HSPA8	9.00616e-20	-0.286514	0.931	0.959	3.29635e-15	mRNA processing; RNA splicing; protein refolding; vesicle-mediated transport; cellular response to heat; response to unfolded protein; regulation of mRNA stability; viral process; regulation of cellular response to heat; neutrophil degranulation; protein folding; negative regulation of transcription, DNA-templated; membrane organization; cytokine-mediated signaling pathway; neurotransmitter secre…	RNA binding; nucleotide binding; ATP binding; protein binding; unfolded protein binding; ATPase activity; cadherin binding; chaperone binding; enzyme binding; ubiquitin protein ligase binding; ATPase activity, coupled; G protein-coupled receptor binding; heat shock protein binding; MHC class II protein complex binding; protein folding chaperone; misfolded protein binding; C3HC4-type RING finger d…	nucleus; cytoplasm; membrane; extracellular space; cytosol; plasma membrane; spliceosomal complex; melanosome; nucleolus; focal adhesion; extracellular region; lysosome; nucleoplasm; extracellular exosome; blood microparticle; autophagosome; ribonucleoprotein complex; axon; dendrite; secretory granule lumen; ficolin-1-rich granule lumen; terminal bouton; chaperone complex; lysosomal lumen; lumena…
FDFT1	9.55913e-20	-0.368514	0.794	0.88	3.49874e-15	lipid metabolic process; biosynthetic process; steroid biosynthetic process; steroid metabolic process; sterol biosynthetic process; metabolic process; lipid biosynthetic process; cholesterol metabolic process; cholesterol biosynthetic process; ergosterol biosynthetic process; regulation of cholesterol biosynthetic process; regulation of lipid metabolic process; farnesyl diphosphate metabolic pro…	metal ion binding; transferase activity; protein binding; catalytic activity; transferase activity, transferring alkyl or aryl (other than methyl) groups; farnesyl-diphosphate farnesyltransferase activity; squalene synthase activity	endoplasmic reticulum; membrane; integral component of membrane; endoplasmic reticulum membrane; intracellular membrane-bounded organelle
CMTM7	1.31067e-19	0.133498	0.126	0.037	4.7972e-15	signal transduction; B-1a B cell differentiation; chemotaxis	cytokine activity	membrane; integral component of membrane; extracellular space
RPS29	1.38313e-19	0.180744	0.999	0.998	5.0624e-15	translation; cytoplasmic translation; viral transcription; translational initiation; nuclear-transcribed mRNA catabolic process, nonsense-mediated decay; SRP-dependent cotranslational protein targeting to membrane	zinc ion binding; metal ion binding; structural constituent of ribosome; RNA binding	cytoplasm; endoplasmic reticulum; ribosome; cytosol; cytosolic small ribosomal subunit; focal adhesion; nucleoplasm; extracellular exosome; rough endoplasmic reticulum; cytoplasmic side of rough endoplasmic reticulum membrane; small ribosomal subunit; polysomal ribosome; intracellular
FGFR2	1.54694e-19	-0.239741	0.107	0.252	5.66195e-15	protein phosphorylation; phosphorylation; positive regulation of cell population proliferation; apoptotic process; positive regulation of Wnt signaling pathway; bone development; fibroblast growth factor receptor signaling pathway; transmembrane receptor protein tyrosine kinase signaling pathway; negative regulation of transcription by RNA polymerase II; axonogenesis; positive regulation of trans…	nucleotide binding; protein kinase activity; ATP binding; kinase activity; transferase activity; protein tyrosine kinase activity; transmembrane receptor protein tyrosine kinase activity; protein homodimerization activity; protein binding; fibroblast growth factor-activated receptor activity; heparin binding; fibroblast growth factor binding	nucleus; cytoplasm; membrane; integral component of membrane; intracellular membrane-bounded organelle; nucleoplasm; Golgi apparatus; plasma membrane; extracellular region; cytoplasmic vesicle; cell surface; integral component of plasma membrane; receptor complex; collagen-containing extracellular matrix; cell cortex; excitatory synapse
EEF1A2	2.57473e-19	-0.319432	0.536	0.68	9.42377e-15	translation; translational elongation; regulation of chaperone-mediated autophagy; response to inorganic substance; positive regulation of apoptotic process; response to electrical stimulus; positive regulation of lipid kinase activity	nucleotide binding; GTPase activity; GTP binding; protein binding; translation elongation factor activity; protein kinase binding; translation factor activity, RNA binding	cytoplasm; cytoplasmic side of lysosomal membrane; eukaryotic translation elongation factor 1 complex; neuronal cell body; synapse
DACH1	3.28351e-19	-0.305184	0.588	0.769	1.2018e-14	negative regulation of cell migration; multicellular organism development; regulation of transcription, DNA-templated; negative regulation of transcription by RNA polymerase II; negative regulation of transcription by competitive promoter binding; negative regulation of transcription, DNA-templated; suckling behavior; respiratory gaseous exchange by respiratory system; cell population proliferati…	DNA binding; protein binding; RNA polymerase II regulatory region sequence-specific DNA binding; DNA-binding transcription repressor activity, RNA polymerase II-specific; RNA polymerase II proximal promoter sequence-specific DNA binding; DNA-binding transcription factor activity, RNA polymerase II-specific; DNA-binding transcription factor activity	nucleus; transcription factor complex; cytoplasm
SHTN1	3.93627e-19	0.20021	0.168	0.063	1.44071e-14	multicellular organism development; axonogenesis; substrate-dependent cell migration, cell extension; Ras protein signal transduction; Cdc42 protein signal transduction; netrin-activated signaling pathway; positive regulation of axon extension; neuron projection morphogenesis; cytoplasmic actin-based contraction involved in cell motility; endoplasmic reticulum polarization; actin filament bundle …	protein binding; cadherin binding; actin filament binding; kinesin binding	cytoplasm; cytoskeleton; cell projection; perinuclear region of cytoplasm; axon; microtubule associated complex; microtubule cytoskeleton; lamellipodium; filopodium; growth cone; cell leading edge; perikaryon; axonal growth cone; microtubule
EIF4A1	4.30137e-19	-0.262284	0.949	0.981	1.57434e-14	translation; translational initiation; viral process; cytoplasmic translational initiation	nucleic acid binding; ATP binding; nucleotide binding; hydrolase activity; helicase activity; RNA binding; translation initiation factor activity; protein binding; RNA helicase activity; mRNA binding; RNA cap binding; double-stranded RNA binding; translation factor activity, RNA binding	cytoplasm; membrane; cytosol; extracellular exosome; eukaryotic translation initiation factor 4F complex
RPS10	4.30602e-19	-0.2069	0.994	0.997	1.57605e-14	translation; ribosomal small subunit assembly; viral transcription; translational initiation; nuclear-transcribed mRNA catabolic process, nonsense-mediated decay; SRP-dependent cotranslational protein targeting to membrane	RNA binding; structural constituent of ribosome; protein binding	nucleus; cytoplasm; membrane; cytosol; ribosome; cytosolic small ribosomal subunit; nucleolus; focal adhesion; nucleoplasm
HNRNPAB	5.55718e-19	-0.307804	0.627	0.747	2.03398e-14	positive regulation of transcription, DNA-templated; epithelial to mesenchymal transition	nucleic acid binding; RNA binding; protein binding; sequence-specific DNA binding; DNA-binding transcription factor activity; sequence-specific double-stranded DNA binding; mRNA binding	nucleus; cytoplasm; nucleoplasm; ribonucleoprotein complex; RNA polymerase II transcription factor complex
RPS23	6.34802e-19	0.164207	1	1	2.32344e-14	translation; cytoplasmic translation; viral transcription; translational initiation; stress granule assembly; nuclear-transcribed mRNA catabolic process, nonsense-mediated decay; SRP-dependent cotranslational protein targeting to membrane; maintenance of translational fidelity	RNA binding; structural constituent of ribosome; protein binding	cytoplasm; membrane; endoplasmic reticulum; cytosol; ribosome; small ribosomal subunit; cytosolic small ribosomal subunit; nucleoplasm; rough endoplasmic reticulum; polysomal ribosome; synapse
KLHDC8A	7.53677e-19	0.335429	0.326	0.189	2.75853e-14		protein binding
GSTP1	8.74067e-19	-0.203621	0.979	0.99	3.19917e-14	negative regulation of ERK1 and ERK2 cascade; negative regulation of MAPK cascade; negative regulation of fibroblast proliferation; negative regulation of MAP kinase activity; negative regulation of JUN kinase activity; cellular response to lipopolysaccharide; negative regulation of tumor necrosis factor-mediated signaling pathway; regulation of ERK1 and ERK2 cascade; negative regulation of prote…	transferase activity; protein binding; glutathione transferase activity; glutathione peroxidase activity; drug binding; JUN kinase binding; kinase regulator activity; protein kinase binding; S-nitrosoglutathione binding; dinitrosyl-iron complex binding; glutathione binding; nitric oxide binding	nucleus; cytoplasm; cytosol; mitochondrion; extracellular space; extracellular region; extracellular exosome; secretory granule lumen; ficolin-1-rich granule lumen; vesicle; plasma membrane; TRAF2-GSTP1 complex
SNRPB	1.03714e-18	-0.295937	0.766	0.859	3.79605e-14	mRNA processing; RNA splicing; spliceosomal snRNP assembly; mRNA splicing, via spliceosome; import into nucleus; termination of RNA polymerase II transcription; protein methylation; histone mRNA metabolic process; brain development	RNA binding; protein binding; telomerase RNA binding; histone pre-mRNA DCP binding; U1 snRNP binding; U2 snRNP binding	nucleus; cytoplasm; nucleoplasm; cytosol; spliceosomal complex; catalytic step 2 spliceosome; U1 snRNP; U4/U6 x U5 tri-snRNP complex; U2 snRNP; U4 snRNP; U5 snRNP; methylosome; telomerase holoenzyme complex; SMN-Sm protein complex; U2-type precatalytic spliceosome; U2-type catalytic step 2 spliceosome; U2-type prespliceosome; U12-type spliceosomal complex; small nuclear ribonucleoprotein complex;…
NDRG2	1.06212e-18	-0.164969	0.049	0.168	3.88745e-14	multicellular organism development; Wnt signaling pathway; cell differentiation; signal transduction; nervous system development; substantia nigra development; negative regulation of cytokine production; regulation of vascular endothelial growth factor production; negative regulation of smooth muscle cell proliferation; negative regulation of ERK1 and ERK2 cascade; regulation of platelet-derived …	protein binding	cytoplasm; cytosol; cell projection; perinuclear region of cytoplasm; growth cone; extracellular exosome; Golgi apparatus; nucleus; membrane; integral component of membrane
SLC2A1	1.10477e-18	0.454061	0.298	0.17	4.04358e-14	transmembrane transport; carbohydrate transport; glucose transmembrane transport; regulation of insulin secretion; protein-containing complex assembly; L-ascorbic acid metabolic process; lactose biosynthetic process; response to hypoxia; response to osmotic stress; female pregnancy; regulation of glucose transmembrane transport; cerebral cortex development; response to insulin; cellular response …	transmembrane transporter activity; transporter activity; protein binding; identical protein binding; glucose transmembrane transporter activity; protein self-association; kinase binding; dehydroascorbic acid transmembrane transporter activity; xenobiotic transmembrane transporter activity; D-glucose transmembrane transporter activity	membrane; integral component of membrane; plasma membrane; melanosome; midbody; integral component of plasma membrane; extracellular exosome; blood microparticle; cell surface; Golgi membrane; cortical actin cytoskeleton; apical plasma membrane; female pronucleus; cytoplasm; cytosol; caveola; cell-cell junction; intercalated disc; basolateral plasma membrane; Z disc; vesicle; sarcolemma; membrane…
TMPO	1.12768e-18	-0.294185	0.539	0.699	4.12742e-14	regulation of transcription, DNA-templated	DNA binding; protein binding; lamin binding; cadherin binding	nucleus; cytoplasm; membrane; integral component of membrane; nuclear membrane; nuclear inner membrane; nuclear envelope; chromosome; chromatin
PLAAT3	1.75656e-18	0.147433	0.131	0.041	6.42917e-14	lipid metabolic process; lipid catabolic process; triglyceride metabolic process; peroxisome organization; phospholipid biosynthetic process; response to bacterium; negative regulation of cell cycle; ether lipid metabolic process; regulation of adipose tissue development; phospholipid metabolic process; phosphatidylinositol acyl-chain remodeling; phosphatidylserine acyl-chain remodeling; phosphat…	transferase activity; hydrolase activity; protein binding; phospholipase A2 activity; phospholipase A1 activity; phospholipase A2 activity (consuming 1,2-dipalmitoylphosphatidylcholine); phospholipase A2 activity consuming 1,2-dioleoylphosphatidylethanolamine); N-acyltransferase activity; phosphatidylserine 1-acylhydrolase activity; 1-acyl-2-lysophosphatidylserine acylhydrolase activity	cytoplasm; membrane; integral component of membrane; plasma membrane; perinuclear region of cytoplasm; peroxisome; endoplasmic reticulum; peroxisomal membrane; cytosol
GPC1	1.87612e-18	-0.307181	0.455	0.625	6.86678e-14	negative regulation of fibroblast growth factor receptor signaling pathway; regulation of signal transduction; leukocyte migration; positive regulation of skeletal muscle cell differentiation; cell migration; axon guidance; retinoid metabolic process; glycosaminoglycan biosynthetic process; glycosaminoglycan catabolic process; regulation of protein localization to membrane; Schwann cell different…	laminin binding; fibroblast growth factor binding; copper ion binding	membrane; cytosol; nucleoplasm; plasma membrane; extracellular space; extracellular region; membrane raft; collagen-containing extracellular matrix; anchored component of membrane; anchored component of plasma membrane; endosome; cell surface; synapse; extracellular matrix; extracellular exosome; intrinsic component of plasma membrane; lysosomal lumen; Golgi lumen
DUSP6	2.10295e-18	0.154238	0.13	0.041	7.69701e-14	protein dephosphorylation; dephosphorylation; peptidyl-tyrosine dephosphorylation; inactivation of MAPK activity; negative regulation of protein phosphorylation; response to organic substance; positive regulation of cell death; response to organic cyclic compound; cell differentiation; response to drug; regulation of heart growth; negative regulation of ERK1 and ERK2 cascade; response to growth f…	hydrolase activity; phosphoprotein phosphatase activity; phosphatase activity; protein tyrosine/serine/threonine phosphatase activity; MAP kinase tyrosine/serine/threonine phosphatase activity; protein tyrosine phosphatase activity	cytoplasm; cytosol; nucleoplasm
RPL24	3.00988e-18	0.169981	1	0.999	1.10164e-13	translation; cytoplasmic translation; ribosomal large subunit assembly; assembly of large subunit precursor of preribosome; viral transcription; translational initiation; nuclear-transcribed mRNA catabolic process, nonsense-mediated decay; SRP-dependent cotranslational protein targeting to membrane; mitotic cell cycle checkpoint; exit from mitosis; optic nerve development; retinal ganglion cell a…	RNA binding; structural constituent of ribosome; cadherin binding; protein binding	cytoplasm; membrane; endoplasmic reticulum; cytosol; ribosome; cytosolic large ribosomal subunit; extracellular exosome; polysomal ribosome; synapse
RPL29	3.04075e-18	0.17944	1	0.999	1.11294e-13	translation; cytoplasmic translation; viral transcription; translational initiation; nuclear-transcribed mRNA catabolic process, nonsense-mediated decay; SRP-dependent cotranslational protein targeting to membrane; embryo implantation	structural constituent of ribosome; RNA binding; heparin binding; cadherin binding	ribosome; intracellular; membrane; cytosolic large ribosomal subunit; cytosol
NSG1	3.33406e-18	-0.271381	0.188	0.342	1.2203e-13	apoptotic process; clathrin coat assembly; dopamine receptor signaling pathway; receptor recycling; positive regulation of receptor recycling; endosomal transport; amyloid precursor protein metabolic process; spontaneous synaptic transmission; neurotransmitter receptor transport, endosome to postsynaptic membrane; vesicle-mediated transport in synapse; neurotransmitter receptor cycle; postsynapti…	protein binding; clathrin light chain binding; signaling receptor binding	membrane; integral component of membrane; endoplasmic reticulum; endoplasmic reticulum membrane; Golgi apparatus; cell projection; cytoplasmic vesicle; cytoplasmic vesicle membrane; lysosome; dendrite; endosome; late endosome membrane; Golgi cisterna membrane; early endosome membrane; endosome membrane; late endosome; recycling endosome membrane; early endosome; lateral plasma membrane; trans-Gol…
CCND1	3.8318e-18	0.389881	0.703	0.589	1.40248e-13	positive regulation of protein phosphorylation; cell division; cellular response to DNA damage stimulus; cell cycle; regulation of cyclin-dependent protein serine/threonine kinase activity; negative regulation of transcription by RNA polymerase II; negative regulation of cell cycle arrest; transcription initiation from RNA polymerase II promoter; positive regulation of G2/M transition of mitotic …	protein binding; transcription corepressor activity; protein kinase binding; enzyme binding; transcription factor binding; proline-rich region binding; histone deacetylase binding; protein kinase activity; cyclin-dependent protein serine/threonine kinase regulator activity; kinase activity; protein-containing complex binding	nucleus; cytoplasm; membrane; nucleoplasm; cytosol; nuclear membrane; intracellular; transcriptional repressor complex; cyclin-dependent protein kinase holoenzyme complex; bicellular tight junction
PACSIN3	4.56292e-18	-0.15996	0.034	0.139	1.67007e-13	plasma membrane tubulation; endocytosis; cytoskeleton organization; positive regulation of membrane protein ectodomain proteolysis; negative regulation of endocytosis; negative regulation of calcium ion transport	protein binding; lipid binding; phospholipid binding; cytoskeletal protein binding; calcium channel inhibitor activity	cytoplasm; membrane; cytosol; plasma membrane; extracellular exosome; cytoskeleton
PKM	4.76832e-18	-0.255272	0.892	0.942	1.74525e-13	phosphorylation; glycolytic process; metabolic process; neutrophil degranulation; programmed cell death; positive regulation of sprouting angiogenesis; canonical glycolysis; cellular response to insulin stimulus; response to hypoxia; liver development; glucose metabolic process; ATP biosynthetic process; response to nutrient; response to gravity; response to organic substance; response to muscle …	RNA binding; metal ion binding; nucleotide binding; ATP binding; kinase activity; transferase activity; magnesium ion binding; catalytic activity; protein binding; pyruvate kinase activity; potassium ion binding; cadherin binding; MHC class II protein complex binding; identical protein binding; ADP binding; thyroid hormone binding	nucleus; cytoplasm; cytosol; mitochondrion; extracellular region; extracellular exosome; collagen-containing extracellular matrix; secretory granule lumen; ficolin-1-rich granule lumen; vesicle; extracellular vesicle; cilium; pyruvate kinase complex
JPH4	6.55812e-18	-0.234781	0.119	0.255	2.40034e-13	release of sequestered calcium ion into cytosol; regulation of ryanodine-sensitive calcium-release channel activity; calcium ion transport into cytosol; regulation of synaptic plasticity; regulation of cytokine production; learning; neuromuscular process controlling balance; regulation of store-operated calcium entry	calcium-release channel activity	membrane; integral component of membrane; endoplasmic reticulum; endoplasmic reticulum membrane; plasma membrane; junctional membrane complex; junctional sarcoplasmic reticulum membrane; smooth endoplasmic reticulum; dendritic shaft
EPHA3	7.16059e-18	-0.221971	0.091	0.221	2.62085e-13	protein phosphorylation; phosphorylation; cell adhesion; transmembrane receptor protein tyrosine kinase signaling pathway; peptidyl-tyrosine phosphorylation; ephrin receptor signaling pathway; axon guidance; regulation of microtubule cytoskeleton organization; regulation of actin cytoskeleton organization; cell migration; regulation of epithelial to mesenchymal transition; regulation of GTPase ac…	nucleotide binding; protein kinase activity; ATP binding; kinase activity; transferase activity; protein tyrosine kinase activity; transmembrane receptor protein tyrosine kinase activity; ephrin receptor activity; protein binding; transmembrane-ephrin receptor activity; GPI-linked ephrin receptor activity	membrane; integral component of membrane; integral component of plasma membrane; plasma membrane; extracellular region; early endosome; receptor complex; neuron projection
VCAN	8.30655e-18	-0.356393	0.693	0.786	3.04028e-13	cell adhesion; cellular protein metabolic process; post-translational protein modification; central nervous system development; multicellular organism development; extracellular matrix organization; skeletal system development; chondroitin sulfate biosynthetic process; chondroitin sulfate catabolic process; dermatan sulfate biosynthetic process; osteoblast differentiation; cell recognition	carbohydrate binding; calcium ion binding; protein binding; hyaluronic acid binding; extracellular matrix structural constituent conferring compression resistance; glycosaminoglycan binding	extracellular space; membrane; extracellular region; extracellular matrix; collagen-containing extracellular matrix; endoplasmic reticulum lumen; lysosomal lumen; Golgi lumen
RSBN1L	8.70936e-18	-0.290063	0.462	0.609	3.18771e-13	oxidation-reduction process	metal ion binding; oxidoreductase activity; dioxygenase activity	nucleus
EZR	1.26533e-17	-0.303292	0.521	0.666	4.63123e-13	phosphatidylinositol-mediated signaling; negative regulation of transcription by RNA polymerase II; positive regulation of gene expression; filopodium assembly; regulation of cell shape; actin filament bundle assembly; axon guidance; establishment of endothelial barrier; cellular response to cAMP; positive regulation of protein secretion; negative regulation of ERK1 and ERK2 cascade; microvillus …	RNA binding; actin binding; protein binding; cytoskeletal protein binding; microtubule binding; identical protein binding; cadherin binding; actin filament binding; protein domain specific binding; S100 protein binding; protein kinase A catalytic subunit binding; protein kinase A regulatory subunit binding; protein kinase A binding; ATPase binding; cell adhesion molecule binding; protein C-termin…	apical part of cell; cytoplasm; membrane; fibrillar center; plasma membrane; extracellular space; cytosol; cytoskeleton; cell projection; perinuclear region of cytoplasm; focal adhesion; endosome; filopodium; extracellular exosome; cell periphery; cell cortex; ruffle membrane; basolateral plasma membrane; protein-containing complex; invadopodium; extrinsic component of membrane; microvillus; brus…
S100A13	1.51424e-17	0.21012	0.183	0.078	5.54229e-13	protein transport; positive regulation of I-kappaB kinase/NF-kappaB signaling; cytokine secretion; mast cell degranulation; interleukin-1 alpha secretion; positive regulation of cell population proliferation; regulation of cell shape; response to copper ion; response to electrical stimulus	metal ion binding; calcium ion binding; zinc ion binding; protein homodimerization activity; protein binding; lipid binding; copper ion binding; RAGE receptor binding; fibroblast growth factor binding	nucleus; cytoplasm; nucleolus; cytosol; plasma membrane; extracellular space; extracellular region; perinuclear region of cytoplasm; mast cell granule
CBX3	1.63746e-17	-0.258017	0.754	0.86	5.99326e-13	chromatin organization; negative regulation of transcription, DNA-templated; cellular response to DNA damage stimulus; rhythmic process; negative regulation of G0 to G1 transition; chromatin remodeling	protein binding; identical protein binding; enzyme binding; protein domain specific binding; histone methyltransferase binding	nucleus; spindle; nucleoplasm; nuclear inner membrane; nuclear euchromatin; nuclear chromosome, telomeric region; condensed chromosome, centromeric region; chromatin; nuclear envelope; site of DNA damage; nuclear heterochromatin; chromosome, centromeric region; nuclear pericentric heterochromatin
CELSR1	2.66025e-17	-0.20923	0.121	0.26	9.73679e-13	G protein-coupled receptor signaling pathway; cell adhesion; homophilic cell adhesion via plasma membrane adhesion molecules; signal transduction; cell surface receptor signaling pathway; multicellular organism development; cell-cell adhesion; Wnt signaling pathway, planar cell polarity pathway; neural tube closure; central nervous system development; establishment of planar polarity; neuron migr…	G protein-coupled receptor activity; calcium ion binding; transmembrane signaling receptor activity; protein dimerization activity	membrane; integral component of membrane; nucleoplasm; plasma membrane; integral component of plasma membrane
HSP90AA1	2.69863e-17	-0.226113	0.994	0.999	9.87725e-13	positive regulation of protein kinase B signaling; positive regulation of protein phosphorylation; positive regulation of tau-protein kinase activity; protein folding; signal transduction; response to cold; response to heat; receptor-mediated endocytosis; Fc-gamma receptor signaling pathway involved in phagocytosis; cellular response to heat; response to unfolded protein; protein stabilization; r…	RNA binding; nucleotide binding; ATP binding; protein homodimerization activity; protein binding; unfolded protein binding; identical protein binding; ATPase activity; TPR domain binding; tau protein binding; histone deacetylase binding; scaffold protein binding; GTPase binding; disordered domain specific binding; nitric-oxide synthase regulator activity; protein tyrosine kinase binding; MHC clas…	neuronal cell body; nucleus; cytoplasm; membrane; cytosol; plasma membrane; melanosome; extracellular region; cell surface; nucleoplasm; extracellular exosome; protein-containing complex; secretory granule lumen; ficolin-1-rich granule lumen; perinuclear region of cytoplasm; axonal growth cone; endocytic vesicle lumen; lysosomal lumen; myelin sheath; dendritic growth cone
MAGED2	2.87655e-17	-0.287803	0.83	0.915	1.05284e-12	renal sodium ion absorption; female pregnancy; platelet degranulation	protein binding	membrane; nucleus; nucleolus; cytosol; extracellular region; platelet alpha granule lumen
AUXG01000058.1	3.27505e-17	0.403894	0.334	0.202	1.1987e-12
CARMIL1	3.53452e-17	-0.171218	0.055	0.169	1.29367e-12	positive regulation of cell migration; barbed-end actin filament uncapping; positive regulation of lamellipodium organization; negative regulation of barbed-end actin filament capping; urate metabolic process; ruffle organization; positive regulation of actin filament polymerization; positive regulation of stress fiber assembly; blood coagulation; cell migration; actin filament organization; acti…	protein binding; protein-containing complex binding	lamellipodium; cytoplasm; nuclear speck; membrane; nucleus; cytosol; plasma membrane; cytoskeleton; cell projection; cell leading edge; extracellular exosome; filamentous actin; macropinosome
ALKBH7	4.46219e-17	0.291465	0.707	0.596	1.63321e-12	oxidation-reduction process; fatty acid metabolic process; cellular response to DNA damage stimulus; regulation of mitochondrial membrane permeability involved in programmed necrotic cell death; programmed cell death; regulation of lipid storage	metal ion binding; oxidoreductase activity; dioxygenase activity	mitochondrion; mitochondrial matrix
NRP2	5.19465e-17	0.166801	0.134	0.047	1.90129e-12	positive regulation of endothelial cell migration; cell adhesion; axon guidance; multicellular organism development; cell differentiation; angiogenesis; nervous system development; viral process; vascular endothelial growth factor signaling pathway; positive regulation of endothelial cell proliferation; vascular endothelial growth factor receptor signaling pathway; outflow tract septum morphogene…	metal ion binding; protein binding; semaphorin receptor activity; vascular endothelial growth factor-activated receptor activity; heparin binding; signaling receptor activity; growth factor binding; cytokine binding	membrane; integral component of membrane; extracellular region; plasma membrane; semaphorin receptor complex; axon; glutamatergic synapse; integral component of postsynaptic membrane
ROBO2	6.5437e-17	0.296754	0.494	0.354	2.39506e-12	ventricular septum morphogenesis; multicellular organism development; cell differentiation; chemotaxis; nervous system development; axon guidance; aorta development; brain development; homophilic cell adhesion via plasma membrane adhesion molecules; outflow tract septum morphogenesis; metanephros development; aortic valve morphogenesis; pulmonary valve morphogenesis; negative regulation of synaps…	protein binding; identical protein binding; axon guidance receptor activity	membrane; integral component of membrane; cell surface; plasma membrane; extracellular exosome; axolemma
DCX	6.75413e-17	-0.231825	0.186	0.335	2.47208e-12	intracellular signal transduction; multicellular organism development; cell differentiation; nervous system development; central nervous system development; neuron migration; axoneme assembly; photoreceptor cell development; retina development in camera-type eye; brain development; hippocampus development; layer formation in cerebral cortex; pyramidal neuron development; central nervous system pr…	protein binding; microtubule binding; protein kinase binding	cytoplasm; cytosol; cell projection; microtubule; neuron projection; cytoskeleton; microtubule associated complex; axoneme
SIX3	7.91626e-17	0.130119	0.116	0.036	2.89743e-12	regulation of transcription, DNA-templated; multicellular organism development; brain development; eye development; visual perception; negative regulation of transcription, DNA-templated; anatomical structure development; regulation of cell population proliferation; negative regulation of neuron differentiation; apoptotic process involved in development; lens development in camera-type eye; epith…	DNA binding; DNA-binding transcription factor activity; DNA-binding transcription factor activity, RNA polymerase II-specific; protein binding; transcription coactivator activity; transcription regulatory region sequence-specific DNA binding; RNA polymerase II distal enhancer sequence-specific DNA binding; transcription corepressor binding; DNA-binding transcription activator activity, RNA polyme…	nucleus; nuclear chromatin; transcription factor complex
PAFAH1B3	8.75138e-17	-0.274002	0.686	0.795	3.20309e-12	lipid metabolic process; lipid catabolic process; nervous system development; brain development; spermatogenesis	hydrolase activity; protein binding; identical protein binding; 1-alkyl-2-acetylglycerophosphocholine esterase activity; platelet-activating factor acetyltransferase activity; protein heterodimerization activity	cytoplasm; membrane; cytosol
NKAIN4	1.17277e-16	0.316456	0.621	0.494	4.29246e-12	regulation of sodium ion transport		membrane; integral component of membrane; plasma membrane
LIMA1	1.23517e-16	-0.297788	0.265	0.421	4.52085e-12	actin filament bundle assembly; negative regulation of actin filament depolymerization; lipid metabolic process; steroid metabolic process; cholesterol metabolic process; cell migration; cholesterol homeostasis; ruffle organization; intestinal cholesterol absorption	metal ion binding; actin filament binding; actin binding; protein binding; cadherin binding; actin monomer binding	plasma membrane; focal adhesion; actin cytoskeleton; cytoplasm; membrane; cytosol; cytoskeleton; cell junction; stress fiber; cleavage furrow; ruffle; brush border membrane; brush border
TPT1	1.26659e-16	0.1517	0.999	0.999	4.63583e-12	negative regulation of apoptotic process; calcium ion transport; response to virus; regulation of apoptotic process; cellular calcium ion homeostasis; negative regulation of intrinsic apoptotic signaling pathway in response to DNA damage	RNA binding; protein binding; calcium ion binding	cytoplasm; cytosol; spindle pole; extracellular exosome; extracellular space; nucleus; cytoplasmic microtubule; multivesicular body
RPL23	1.45502e-16	0.179686	1	0.998	5.3255e-12	translation; viral transcription; translational initiation; ribosomal protein import into nucleus; nuclear-transcribed mRNA catabolic process, nonsense-mediated decay; SRP-dependent cotranslational protein targeting to membrane; negative regulation of transcription by RNA polymerase II; positive regulation of cell population proliferation; positive regulation of gene expression; protein-DNA compl…	RNA binding; structural constituent of ribosome; protein binding; large ribosomal subunit rRNA binding; ubiquitin protein ligase binding; transcription coactivator binding; ubiquitin ligase inhibitor activity	membrane; ribosome; focal adhesion; cytosolic large ribosomal subunit; cytosol; extracellular exosome; protein-containing complex; cytoplasm; nucleoplasm; nucleolus; postsynaptic density
CDH2	1.63338e-16	0.33892	0.849	0.803	5.97832e-12	cell adhesion; homophilic cell adhesion via plasma membrane adhesion molecules; cell-cell adhesion; heterophilic cell-cell adhesion via plasma membrane cell adhesion molecules; regulation of signal transduction; glial cell differentiation; calcium-dependent cell-cell adhesion via plasma membrane cell adhesion molecules; cell migration; telencephalon development; cerebral cortex development; posit…	metal ion binding; calcium ion binding; protein binding; enzyme binding; protein kinase binding; protein phosphatase binding; identical protein binding; cadherin binding; protein homodimerization activity; beta-catenin binding; cytoskeletal protein binding; gamma-catenin binding; alpha-catenin binding	cytoplasm; membrane; integral component of membrane; plasma membrane; cell junction; cell surface; focal adhesion; integral component of plasma membrane; cell-cell junction; adherens junction; fascia adherens; postsynaptic density; intercalated disc; basolateral plasma membrane; apical plasma membrane; lamellipodium; sarcolemma; plasma membrane raft; synapse; neuron projection; collagen-containin…
CYYR1	1.681e-16	0.211763	0.249	0.131	6.15263e-12			membrane; integral component of membrane
ZNF703	1.778e-16	-0.166022	0.043	0.146	6.50765e-12	positive regulation of cell migration; positive regulation of cell population proliferation; regulation of cell cycle; regulation of transcription, DNA-templated; negative regulation of transcription, DNA-templated; positive regulation of epithelial to mesenchymal transition; mammary gland epithelial cell differentiation; adherens junction assembly; cellular response to estradiol stimulus; regula…	nucleic acid binding; metal ion binding; protein binding; repressing transcription factor binding	nucleus; cytoplasm; protein-containing complex; nuclear matrix
PFDN5	1.86688e-16	0.196931	0.984	0.981	6.83296e-12	negative regulation of canonical Wnt signaling pathway; protein folding; negative regulation of transcription, DNA-templated; regulation of transcription, DNA-templated; retina development in camera-type eye	protein binding; unfolded protein binding; transcription corepressor activity	nucleus; cytoplasm; prefoldin complex
SLC1A2	2.31834e-16	0.19917	0.137	0.05	8.48537e-12	amino acid transport; ion transport; glutamate secretion; chemical synaptic transmission; L-glutamate transmembrane transport; protein homotrimerization; D-aspartate import across plasma membrane; L-glutamate import across plasma membrane; nervous system development; visual behavior; response to light stimulus; response to wounding; multicellular organism aging; telencephalon development; adult b…	metal ion binding; symporter activity; protein binding; L-glutamate transmembrane transporter activity; high-affinity glutamate transmembrane transporter activity; glutamate:sodium symporter activity; anion transmembrane transporter activity	membrane; integral component of membrane; plasma membrane; cell surface; integral component of plasma membrane; axon; axolemma; glutamatergic synapse; integral component of presynaptic membrane
ID2	2.39864e-16	0.396908	0.525	0.389	8.77927e-12	regulation of lipid metabolic process; negative regulation of transcription, DNA-templated; rhythmic process; multicellular organism development; circadian regulation of gene expression; positive regulation of transcription, DNA-templated; neuron differentiation; regulation of cell cycle; positive regulation of gene expression; circadian rhythm; negative regulation of gene expression; negative re…	protein dimerization activity; protein binding; DNA-binding transcription factor activity; DNA-binding transcription factor activity, RNA polymerase II-specific; transcription factor binding; ion channel binding; RNA polymerase II transcription factor binding	cytoplasm; nucleus; protein-containing complex; cytosol
PAPPA2	2.59178e-16	-0.180743	0.045	0.147	9.48616e-12	proteolysis; cellular protein metabolic process; regulation of cell growth; response to salt stress; bone morphogenesis	zinc ion binding; metal ion binding; hydrolase activity; peptidase activity; metallopeptidase activity; protein binding	extracellular region; extracellular exosome; cytosol; apical plasma membrane
RPL15	2.60853e-16	0.127785	1	0.999	9.54749e-12	translation; cytoplasmic translation; viral transcription; translational initiation; nuclear-transcribed mRNA catabolic process, nonsense-mediated decay; SRP-dependent cotranslational protein targeting to membrane	RNA binding; structural constituent of ribosome; protein binding; cadherin binding	nucleus; membrane; ribosome; cytosolic large ribosomal subunit; cytosol; intracellular
NDUFC2	3.7204e-16	-0.261679	0.937	0.958	1.36171e-11	oxidation-reduction process; mitochondrial electron transport, NADH to ubiquinone; mitochondrial respiratory chain complex I assembly; neutrophil degranulation	NADH dehydrogenase (ubiquinone) activity	membrane; integral component of membrane; mitochondrion; mitochondrial inner membrane; respirasome; plasma membrane; cytoplasm; mitochondrial respiratory chain complex I; azurophil granule membrane
RIC3	4.68768e-16	0.234838	0.148	0.058	1.71574e-11	synaptic transmission, cholinergic; protein folding; protein localization to cell surface; positive regulation of cytosolic calcium ion concentration; cellular protein-containing complex assembly	acetylcholine receptor binding; protein folding chaperone	membrane; integral component of membrane; endoplasmic reticulum; endoplasmic reticulum membrane; Golgi apparatus; Golgi membrane; intracellular membrane-bounded organelle; neuron projection; neuronal cell body
ARGLU1	5.10185e-16	-0.258802	0.77	0.859	1.86733e-11		protein binding; cadherin binding	nucleus; nucleoplasm; mitochondrion
FAM20C	6.76889e-16	-0.128294	0.019	0.103	2.47748e-11	phosphorylation; protein phosphorylation; biomineral tissue development; cellular protein metabolic process; post-translational protein modification; skeletal system development; positive regulation of bone mineralization; osteoclast maturation; regulation of fibroblast growth factor receptor signaling pathway; positive regulation of osteoblast differentiation; ATP metabolic process; regulation o…	metal ion binding; nucleotide binding; protein serine/threonine kinase activity; ATP binding; kinase activity; transferase activity; protein binding; manganese ion binding; phosphotransferase activity, alcohol group as acceptor; calcium ion binding	Golgi apparatus; extracellular space; extracellular region; extracellular exosome; endoplasmic reticulum lumen; cytoplasm
PLTP	7.24295e-16	0.268706	0.412	0.275	2.65099e-11	lipid metabolic process; lipid transport; ceramide transport; phospholipid transport; high-density lipoprotein particle remodeling; positive regulation of cholesterol efflux; vitamin E biosynthetic process; flagellated sperm motility	lipid binding; phosphatidylethanolamine binding; phosphatidylcholine binding; phosphatidylcholine transporter activity; phosphatidic acid binding; lipid transporter activity; phospholipid transporter activity; phosphatidylglycerol binding; diacylglycerol binding; ceramide binding; ceramide transfer activity; phosphatidylethanolamine transfer activity; phosphatidic acid transfer activity	extracellular space; extracellular region; high-density lipoprotein particle
CAMK2N1	7.93456e-16	-0.311347	0.348	0.504	2.90413e-11	positive regulation of gene expression; negative regulation of cell population proliferation; negative regulation of cell cycle; negative regulation of protein kinase activity; negative regulation of ERK1 and ERK2 cascade; negative regulation of proteolysis; negative regulation of cyclin-dependent protein kinase activity	protein kinase inhibitor activity; protein kinase binding; calcium-dependent protein kinase inhibitor activity	membrane; plasma membrane; cell junction; synapse; postsynaptic membrane; postsynaptic density; neuron projection; dendrite; neuronal cell body
ZNF521	9.32832e-16	0.204836	0.238	0.122	3.41426e-11	multicellular organism development; cell differentiation; neuron fate commitment	nucleic acid binding; metal ion binding; DNA binding; protein domain specific binding	nucleus
DPPA4	1.05611e-15	0.16336	0.133	0.048	3.86548e-11	multicellular organism development; somatic stem cell population maintenance	protein binding; chromatin binding	nucleus; nucleoplasm
GOLGB1	1.1934e-15	0.276438	0.751	0.621	4.36796e-11	regulation of transcription, DNA-templated; endoplasmic reticulum to Golgi vesicle-mediated transport; Golgi organization; protein localization to pericentriolar material	RNA binding; DNA-binding transcription factor activity; sequence-specific DNA binding; protein binding	membrane; integral component of membrane; Golgi apparatus; Golgi membrane; endoplasmic reticulum-Golgi intermediate compartment; Golgi stack; cis-Golgi network
STX10	1.25736e-15	-0.221164	0.213	0.357	4.60206e-11	vesicle-mediated transport; Golgi vesicle transport; intracellular protein transport; protein transport; retrograde transport, endosome to Golgi; vesicle fusion; vesicle docking; regulation of protein localization; membrane fusion	SNAP receptor activity; protein binding; SNARE binding; syntaxin binding	membrane; integral component of membrane; cytosol; Golgi apparatus; Golgi membrane; perinuclear region of cytoplasm; trans-Golgi network; SNARE complex; endomembrane system; synaptic vesicle; trans-Golgi network membrane; vesicle; integral component of synaptic vesicle membrane; cell
NACA	1.2861e-15	0.156093	0.999	0.999	4.70726e-11	protein transport; translation; skeletal muscle tissue regeneration; positive regulation of cell proliferation involved in heart morphogenesis; negative regulation of striated muscle cell apoptotic process; heart trabecula morphogenesis; cardiac ventricle development; positive regulation of skeletal muscle tissue growth; regulation of skeletal muscle fiber development; negative regulation of tran…	DNA binding; protein binding; transcription coactivator activity	nascent polypeptide-associated complex; nucleus; cytoplasm; extracellular exosome
KMT2C	1.3012e-15	-0.326276	0.431	0.575	4.76251e-11	histone H3-K4 methylation; regulation of transcription, DNA-templated; methylation; chromatin organization; histone lysine methylation; positive regulation of transcription by RNA polymerase II; regulation of megakaryocyte differentiation	metal ion binding; histone methyltransferase activity (H3-K4 specific); protein binding; RNA binding; transferase activity; methyltransferase activity; DNA binding; transferase activity, transferring acyl groups; histone-lysine N-methyltransferase activity; histone binding; transcription coactivator activity	nucleus; MLL3/4 complex; nucleoplasm; histone methyltransferase complex
DHRS3	1.32671e-15	-0.208949	0.092	0.212	4.8559e-11	oxidation-reduction process; electron transport chain; retinol metabolic process; visual perception; retinoid metabolic process; outflow tract morphogenesis; regulation of ossification; regulation of retinoic acid receptor signaling pathway; negative regulation of retinoic acid receptor signaling pathway; roof of mouth development; bone morphogenesis; cardiac septum morphogenesis	oxidoreductase activity; retinol dehydrogenase activity; NADP-retinol dehydrogenase activity; electron transfer activity; nucleotide binding	membrane; integral component of membrane; endoplasmic reticulum membrane; lipid droplet; photoreceptor outer segment membrane
ACAT2	1.54507e-15	-0.384977	0.653	0.748	5.6551e-11	fatty acid metabolic process; lipid metabolic process; cholesterol biosynthetic process; fatty acid beta-oxidation	transferase activity; catalytic activity; transferase activity, transferring acyl groups; protein binding; transferase activity, transferring acyl groups other than amino-acyl groups; acetyl-CoA C-acyltransferase activity; acetyl-CoA C-acetyltransferase activity	cytoplasm; nucleus; nucleolus; cytosol; mitochondrion; extracellular exosome
IGFBP5	2.52007e-15	-0.183769	0.076	0.19	9.22371e-11	positive regulation of vascular smooth muscle cell proliferation; positive regulation of vascular associated smooth muscle cell migration; negative regulation of insulin-like growth factor receptor signaling pathway; negative regulation of cell migration; negative regulation of smooth muscle cell proliferation; regulation of cell growth; osteoblast differentiation; female pregnancy; aging; hair f…	protein binding; insulin-like growth factor binding; fibronectin binding; growth factor binding; insulin-like growth factor I binding; insulin-like growth factor II binding	extracellular region; extracellular space; endoplasmic reticulum lumen; insulin-like growth factor binding protein complex; insulin-like growth factor ternary complex
RPS16	2.70149e-15	0.157245	0.999	0.998	9.88773e-11	translation; cellular response to leukemia inhibitory factor; rRNA processing; ribosomal small subunit biogenesis; maturation of SSU-rRNA from tricistronic rRNA transcript (SSU-rRNA, 5.8S rRNA, LSU-rRNA); viral transcription; translational initiation; nuclear-transcribed mRNA catabolic process, nonsense-mediated decay; SRP-dependent cotranslational protein targeting to membrane	structural constituent of ribosome; RNA binding; protein binding	ribosome; membrane; cytosolic small ribosomal subunit; focal adhesion; nucleoplasm; cytosol; extracellular exosome; small ribosomal subunit
MCM5	2.80599e-15	-0.241735	0.203	0.345	1.02702e-10	cell division; DNA duplex unwinding; DNA replication initiation; cell cycle; DNA replication; G1/S transition of mitotic cell cycle; double-strand break repair via break-induced replication; pre-replicative complex assembly involved in nuclear cell cycle DNA replication	nucleotide binding; ATP binding; hydrolase activity; DNA binding; protein binding; DNA helicase activity; helicase activity; DNA replication origin binding; single-stranded DNA binding; 3'-5' DNA helicase activity; single-stranded DNA helicase activity	nucleus; cytoplasm; membrane; nucleoplasm; cytosol; MCM complex; nuclear chromosome, telomeric region
HSP90AB1	3.26407e-15	-0.179856	0.997	0.999	1.19468e-10	positive regulation of protein kinase B signaling; positive regulation of tau-protein kinase activity; protein folding; Fc-gamma receptor signaling pathway involved in phagocytosis; cellular response to heat; response to unfolded protein; negative regulation of cell cycle arrest; regulation of cellular response to heat; xenobiotic metabolic process; neutrophil degranulation; negative regulation o…	RNA binding; nucleotide binding; ATP binding; protein binding; unfolded protein binding; identical protein binding; cadherin binding; TPR domain binding; tau protein binding; histone methyltransferase binding; peptide binding; histone deacetylase binding; kinase binding; double-stranded RNA binding; protein homodimerization activity; protein dimerization activity; heat shock protein binding; diso…	neuronal cell body; nucleus; cytoplasm; membrane; cytosol; mitochondrion; plasma membrane; extracellular region; melanosome; cell surface; nucleoplasm; extracellular exosome; COP9 signalosome; protein-containing complex; secretory granule lumen; ficolin-1-rich granule lumen; perinuclear region of cytoplasm; axonal growth cone; dendritic growth cone; aryl hydrocarbon receptor complex; HSP90-CDC37 …
EMX2	3.31365e-15	-0.262861	0.601	0.736	1.21283e-10	regulation of transcription, DNA-templated; multicellular organism development; negative regulation of transcription by RNA polymerase II; neuron differentiation; regulation of transcription by RNA polymerase II; central nervous system development; brain development; anterior/posterior pattern specification; regulation of gene expression; dentate gyrus development; cerebral cortex regionalization…	DNA binding; sequence-specific DNA binding; protein binding; RNA polymerase II proximal promoter sequence-specific DNA binding; DNA-binding transcription factor activity, RNA polymerase II-specific; DNA-binding transcription repressor activity, RNA polymerase II-specific; RNA polymerase II intronic transcription regulatory region sequence-specific DNA binding	nucleus; nuclear chromatin
RPS3	3.54052e-15	0.163124	0.997	0.999	1.29586e-10	translation; translational initiation; cell division; DNA repair; cellular response to DNA damage stimulus; cell cycle; apoptotic process; chromosome segregation; positive regulation of gene expression; regulation of translation; positive regulation of DNA repair; viral transcription; negative regulation of translation; regulation of apoptotic process; positive regulation of NIK/NF-kappaB signali…	RNA binding; lyase activity; DNA binding; structural constituent of ribosome; protein binding; iron-sulfur cluster binding; microtubule binding; mRNA binding; class I DNA-(apurinic or apyrimidinic site) endonuclease activity; protein kinase binding; DNA-(apurinic or apyrimidinic site) endonuclease activity; enzyme binding; transcription factor binding; tubulin binding; damaged DNA binding; oxidiz…	nucleus; cytoplasm; membrane; endoplasmic reticulum; cytosol; mitochondrial inner membrane; mitochondrion; mitochondrial matrix; ribosome; plasma membrane; small ribosomal subunit; cytoskeleton; cytosolic small ribosomal subunit; nucleolus; focal adhesion; spindle; nucleoplasm; extracellular exosome; ruffle membrane; ribonucleoprotein complex; mitotic spindle; polysome; postsynaptic density; NF-k…
RTN4	3.66908e-15	0.260294	0.976	0.955	1.34292e-10	apoptotic process; nervous system development; regulation of apoptotic process; protein localization to lysosome; endoplasmic reticulum tubular network organization; endoplasmic reticulum tubular network formation; protein stabilization; negative regulation of axonogenesis; positive regulation of toll-like receptor 9 signaling pathway; negative regulation of axon extension; axonal fasciculation; …	RNA binding; protein binding; cadherin binding; ubiquitin protein ligase binding	membrane; integral component of membrane; endoplasmic reticulum; endoplasmic reticulum membrane; plasma membrane; cell junction; integral component of endoplasmic reticulum membrane; nuclear envelope; endoplasmic reticulum tubular network membrane; endoplasmic reticulum tubular network; postsynaptic density; cell projection; neuronal cell body
NFIX	3.88556e-15	-0.139299	0.035	0.127	1.42215e-10	regulation of transcription, DNA-templated; DNA replication; negative regulation of transcription by RNA polymerase II; positive regulation of transcription by RNA polymerase II; transcription by RNA polymerase II	DNA binding; DNA-binding transcription factor activity; protein binding; DNA-binding transcription factor activity, RNA polymerase II-specific	nucleus; nuclear chromatin; intracellular; nucleoplasm
NEDD4L	4.57038e-15	-0.247096	0.457	0.603	1.67281e-10	protein ubiquitination; sodium ion transport; ubiquitin-dependent protein catabolic process; cell differentiation; regulation of protein catabolic process; positive regulation of protein catabolic process; ion transmembrane transport; viral life cycle; protein polyubiquitination; proteasome-mediated ubiquitin-dependent protein catabolic process; viral process; regulation of protein stability; reg…	transferase activity; ubiquitin-protein transferase activity; protein binding; ubiquitin protein ligase activity; sodium channel regulator activity; ion channel binding; potassium channel regulator activity; sodium channel inhibitor activity; potassium channel inhibitor activity	cytoplasm; Golgi apparatus; endosome; nucleoplasm; cytosol; extracellular exosome; plasma membrane; multivesicular body
RPL6	5.02329e-15	0.147193	1	1	1.83857e-10	translation; cytoplasmic translation; ribosomal large subunit assembly; viral transcription; translational initiation; regulation of transcription, DNA-templated; nuclear-transcribed mRNA catabolic process, nonsense-mediated decay; SRP-dependent cotranslational protein targeting to membrane	RNA binding; structural constituent of ribosome; cadherin binding; DNA binding	nucleus; cytoplasm; membrane; endoplasmic reticulum; ribosome; cytosol; focal adhesion; cytosolic large ribosomal subunit; cytoplasmic ribonucleoprotein granule; rough endoplasmic reticulum; polysomal ribosome; intracellular; postsynaptic density; synapse
HES6	5.37557e-15	-0.548677	0.431	0.572	1.96751e-10	regulation of transcription, DNA-templated; multicellular organism development; cell differentiation; negative regulation of transcription by RNA polymerase II; anterior/posterior pattern specification; regulation of neurogenesis; regulation of transcription by RNA polymerase II; nervous system development	protein dimerization activity; DNA binding; RNA polymerase II regulatory region sequence-specific DNA binding; DNA-binding transcription factor activity, RNA polymerase II-specific; DNA-binding transcription repressor activity, RNA polymerase II-specific; transcription factor binding; DNA-binding transcription factor activity; transcription coregulator activity	nucleus; nuclear chromatin; transcription factor complex
TMEM54	5.86213e-15	-0.168983	0.064	0.168	2.1456e-10			membrane; integral component of membrane
ADGRV1	6.47342e-15	0.260172	0.382	0.246	2.36934e-10	G protein-coupled receptor signaling pathway; negative regulation of adenylate cyclase activity; signal transduction; cell surface receptor signaling pathway; cell communication; response to stimulus; nervous system development; visual perception; inner ear receptor cell stereocilium organization; regulation of protein stability; positive regulation of bone mineralization; cell-cell adhesion; cel…	G protein-coupled receptor activity; hydrolase activity; protein binding; transmembrane signaling receptor activity; G-protein alpha-subunit binding; adenylate cyclase inhibitor activity; calcium ion binding	integral component of membrane; membrane; plasma membrane; cell projection; extracellular exosome; photoreceptor inner segment; cell surface; stereocilium membrane; cytoplasm; receptor complex; stereocilia ankle link; stereocilia ankle link complex; periciliary membrane compartment; USH2 complex; stereocilium; synapse
MAZ	9.07294e-15	-0.283939	0.518	0.652	3.32079e-10	positive regulation of protein kinase B signaling; positive regulation of gene expression; positive regulation of cell migration; negative regulation of apoptotic signaling pathway; transcription initiation from RNA polymerase II promoter; regulation of transcription by RNA polymerase II; positive regulation of phosphatidylinositol 3-kinase signaling; positive regulation of cell population prolif…	nucleic acid binding; RNA binding; metal ion binding; DNA binding; protein binding; DNA-binding transcription factor activity, RNA polymerase II-specific; RNA polymerase II proximal promoter sequence-specific DNA binding	nucleus
IDI1	9.87307e-15	-0.352197	0.802	0.858	3.61364e-10	lipid metabolic process; steroid biosynthetic process; steroid metabolic process; isoprenoid biosynthetic process; sterol biosynthetic process; cholesterol metabolic process; cholesterol biosynthetic process; regulation of cholesterol biosynthetic process; isopentenyl diphosphate biosynthetic process; dimethylallyl diphosphate biosynthetic process	metal ion binding; isomerase activity; hydrolase activity; isopentenyl-diphosphate delta-isomerase activity	peroxisome; cytosol
RPS26	1.11267e-14	-0.142959	0.999	0.999	4.07248e-10	translation; cytoplasmic translation; viral transcription; translational initiation; nuclear-transcribed mRNA catabolic process, nonsense-mediated decay; SRP-dependent cotranslational protein targeting to membrane; negative regulation of RNA splicing	RNA binding; structural constituent of ribosome; protein binding; mRNA binding; cadherin binding	cytoplasm; membrane; endoplasmic reticulum; ribosome; cytosol; cytosolic small ribosomal subunit; nucleoplasm; extracellular exosome; rough endoplasmic reticulum; cytoplasmic side of rough endoplasmic reticulum membrane; small ribosomal subunit; polysomal ribosome; intracellular
LINC00511	1.12407e-14	-0.211483	0.138	0.267	4.11422e-10
HSPE1	1.13855e-14	-0.229833	0.947	0.969	4.16722e-10	protein folding; response to unfolded protein; activation of cysteine-type endopeptidase activity involved in apoptotic process; osteoblast differentiation; chaperone cofactor-dependent protein refolding	RNA binding; ATP binding; unfolded protein binding; protein binding; chaperone binding; metal ion binding	membrane; mitochondrion; mitochondrial matrix; extracellular exosome; cytoplasm
RPN2	1.29864e-14	0.313409	0.782	0.714	4.75315e-10	protein N-linked glycosylation; protein glycosylation; cellular protein modification process; protein N-linked glycosylation via asparagine; aging; response to drug	protein binding; dolichyl-diphosphooligosaccharide-protein glycotransferase activity; ribosome binding	integral component of membrane; endoplasmic reticulum; endoplasmic reticulum membrane; oligosaccharyltransferase complex; membrane; autophagosome membrane; rough endoplasmic reticulum
TMEM97	1.42372e-14	-0.308872	0.58	0.692	5.21095e-10	regulation of cell growth; cholesterol homeostasis	protein binding	nucleus; membrane; integral component of membrane; cytosol; endoplasmic reticulum; plasma membrane; nuclear membrane; lysosome; rough endoplasmic reticulum membrane; rough endoplasmic reticulum
EFNB2	1.59616e-14	0.291933	0.909	0.878	5.84212e-10	positive regulation of cell population proliferation; positive regulation of cardiac muscle cell differentiation; negative regulation of neuron projection development; cell adhesion; multicellular organism development; cell differentiation; viral entry into host cell; ephrin receptor signaling pathway; nervous system development; axon guidance; viral process; angiogenesis; cell-cell signaling; an…	protein binding; ephrin receptor binding; virus receptor activity; signaling receptor binding	membrane; integral component of membrane; plasma membrane; cell junction; focal adhesion; adherens junction; integral component of plasma membrane; Schaffer collateral - CA1 synapse; glutamatergic synapse; integral component of presynaptic membrane; integral component of postsynaptic density membrane
PEA15	1.85556e-14	-0.275373	0.654	0.78	6.79154e-10	regulation of apoptotic process; DNA damage checkpoint; apoptotic process; carbohydrate transport; MAPK cascade; activation of MAPK activity; negative regulation of glucose import; negative regulation of extrinsic apoptotic signaling pathway via death domain receptors; response to morphine; positive regulation of extrinsic apoptotic signaling pathway via death domain receptors	protein binding	cytoplasm; nucleus; cytosol; microtubule associated complex
STXBP6	2.09937e-14	-0.25645	0.093	0.202	7.68389e-10	vesicle-mediated transport; exocytosis; Golgi to plasma membrane transport; exocyst localization; cell-cell adhesion; regulation of SNARE complex assembly; negative regulation of exocytosis	phosphatidylinositol-4,5-bisphosphate binding; GTP-Rho binding; cadherin binding involved in cell-cell adhesion	cytoplasm; membrane; integral component of membrane; plasma membrane; exocyst; cell-cell adherens junction
SLF1	2.14107e-14	-0.27982	0.33	0.466	7.83653e-10	DNA repair; cellular response to DNA damage stimulus; positive regulation of double-strand break repair; positive regulation of protein complex assembly; positive regulation of maintenance of mitotic sister chromatid cohesion; protein localization to site of double-strand break	protein binding; ubiquitin protein ligase binding; protein-containing complex binding	nucleus; cytoplasm; nucleosome; cytoskeleton; centrosome; microtubule organizing center; site of double-strand break; nuclear inclusion body
TMSB15A	2.54359e-14	-0.23309	0.802	0.89	9.30979e-10	actin filament organization; regulation of cell migration; sequestering of actin monomers	actin binding; actin monomer binding	cytoplasm; cytoskeleton
RPL41	2.76983e-14	-0.115549	1	1	1.01379e-09	translation; cytoplasmic translation; viral transcription; translational initiation; nuclear-transcribed mRNA catabolic process, nonsense-mediated decay; SRP-dependent cotranslational protein targeting to membrane	structural constituent of ribosome; RNA binding; mRNA 3'-UTR binding; mRNA 5'-UTR binding	ribosome; cytosol; cytosolic large ribosomal subunit; polysomal ribosome
SERTAD4	2.94348e-14	-0.163932	0.061	0.162	1.07734e-09			nucleus
SLC38A1	3.12676e-14	0.234597	0.286	0.171	1.14443e-09	ion transport; sodium ion transport; amino acid transmembrane transport; amino acid transport; L-alpha-amino acid transmembrane transport; neutral amino acid transport; neurotransmitter uptake; glutamine transport; female pregnancy	symporter activity; protein binding; amino acid transmembrane transporter activity; neutral amino acid transmembrane transporter activity; amino acid:sodium symporter activity; L-amino acid transmembrane transporter activity; L-glutamine transmembrane transporter activity	membrane; integral component of membrane; plasma membrane; integral component of plasma membrane; extracellular exosome; axon
CHST7	3.15699e-14	0.165316	0.16	0.071	1.15549e-09	carbohydrate metabolic process; chondroitin sulfate biosynthetic process; N-acetylglucosamine metabolic process; sulfur compound metabolic process; polysaccharide metabolic process	transferase activity; sulfotransferase activity; N-acetylglucosamine 6-O-sulfotransferase activity; chondroitin 6-sulfotransferase activity	membrane; integral component of membrane; Golgi apparatus; Golgi membrane; trans-Golgi network
ENHO	3.16286e-14	-0.262436	0.342	0.478	1.15764e-09	signal transduction; positive regulation of Notch signaling pathway; negative regulation of insulin receptor signaling pathway; negative regulation of insulin secretion; negative regulation of lipid biosynthetic process; negative regulation of RNA polymerase II regulatory region sequence-specific DNA binding	hormone activity	extracellular region; plasma membrane
TBC1D1	3.29724e-14	-0.20575	0.219	0.36	1.20682e-09	intracellular protein transport; activation of GTPase activity; membrane organization; regulation of protein localization	GTPase activator activity; Rab GTPase binding; protein binding	nucleus; cytosol
SIPA1L2	3.78568e-14	0.259833	0.338	0.216	1.3856e-09	positive regulation of GTPase activity; regulation of small GTPase mediated signal transduction	GTPase activator activity; protein binding
U2SURP	3.83331e-14	-0.239127	0.748	0.832	1.40303e-09	RNA processing; mRNA splicing, via spliceosome	nucleic acid binding; RNA binding; protein binding	nucleus; nucleoplasm
RCN2	3.91336e-14	0.267568	0.899	0.872	1.43233e-09		metal ion binding; calcium ion binding; protein binding	endoplasmic reticulum; nucleolus; endoplasmic reticulum lumen
FEZF2	3.95627e-14	-0.221017	0.268	0.42	1.44803e-09	multicellular organism development; cell differentiation; positive regulation of transcription by RNA polymerase II; nervous system development; positive regulation of transcription, DNA-templated; negative regulation of transcription by RNA polymerase II; axonal fasciculation; locomotory behavior; negative regulation of cell population proliferation; dendrite development; telencephalon developme…	nucleic acid binding; metal ion binding; DNA binding; DNA-binding transcription factor activity; sequence-specific DNA binding; RNA polymerase II regulatory region sequence-specific DNA binding; chromatin DNA binding; RNA polymerase II proximal promoter sequence-specific DNA binding; DNA-binding transcription repressor activity, RNA polymerase II-specific; DNA-binding transcription activator acti…	nucleus
PRSS23	4.09258e-14	0.140628	0.117	0.043	1.49793e-09	proteolysis; cellular protein metabolic process; post-translational protein modification	hydrolase activity; peptidase activity; serine-type endopeptidase activity; serine-type peptidase activity	extracellular region; extracellular exosome; endoplasmic reticulum lumen; nucleus
SPRY1	4.1012e-14	0.251298	0.228	0.121	1.50108e-09	negative regulation of cell population proliferation; negative regulation of Ras protein signal transduction; negative regulation of ERK1 and ERK2 cascade; organ induction; epithelial to mesenchymal transition involved in cardiac fibroblast development; multicellular organism development; regulation of signal transduction; negative regulation of epidermal growth factor receptor signaling pathway;…	protein binding	cytoplasm; membrane; Golgi apparatus; cytosol; nucleoplasm; plasma membrane
PDCD4	4.14649e-14	-0.265758	0.501	0.626	1.51766e-09	positive regulation of endothelial cell apoptotic process; negative regulation of vascular smooth muscle cell proliferation; positive regulation of inflammatory response; negative regulation of cytokine production involved in inflammatory response; negative regulation of vascular smooth muscle cell differentiation; positive regulation of vascular associated smooth muscle cell apoptotic process; B…	RNA binding; protein binding	nucleus; cytoplasm; cytosol
GPC3	4.19311e-14	0.183137	0.155	0.069	1.53472e-09	regulation of signal transduction; negative regulation of peptidase activity; cellular protein metabolic process; cell migration; post-translational protein modification; positive regulation of canonical Wnt signaling pathway; anatomical structure morphogenesis; retinoid metabolic process; glycosaminoglycan biosynthetic process; glycosaminoglycan catabolic process; positive regulation of endocyto…	protein binding; peptidase inhibitor activity; peptidyl-dipeptidase inhibitor activity	membrane; plasma membrane; collagen-containing extracellular matrix; anchored component of membrane; anchored component of plasma membrane; cell surface; extracellular region; intrinsic component of plasma membrane; endoplasmic reticulum lumen; lysosomal lumen; Golgi lumen; lysosome
DDX46	4.95568e-14	-0.250526	0.795	0.86	1.81383e-09	mRNA processing; RNA splicing; mRNA splicing, via spliceosome	nucleic acid binding; ATP binding; RNA binding; nucleotide binding; hydrolase activity; helicase activity; RNA helicase activity	nuclear speck; fibrillar center; nucleus; membrane; nucleoplasm; Cajal body
PON2	5.94697e-14	0.396391	0.666	0.578	2.17665e-09	lipoxygenase pathway; response to toxic substance; aromatic compound catabolic process; response to oxidative stress	arylesterase activity; metal ion binding; hydrolase activity; identical protein binding; acyl-L-homoserine-lactone lactonohydrolase activity	extracellular region; membrane; plasma membrane; integral component of membrane; nucleus; mitochondrion; lysosome; intracellular membrane-bounded organelle
ZEB2	6.15573e-14	0.210425	0.308	0.184	2.25306e-09	positive regulation of transcription by RNA polymerase II; nervous system development; negative regulation of transcription by RNA polymerase II; neural crest cell migration; somitogenesis; neural tube closure; central nervous system development; corpus callosum morphogenesis; hippocampus development; cell proliferation in forebrain; corticospinal tract morphogenesis; positive regulation of Wnt s…	nucleic acid binding; DNA binding; metal ion binding; protein binding; DNA-binding transcription factor activity, RNA polymerase II-specific; DNA-binding transcription repressor activity, RNA polymerase II-specific; phosphatase regulator activity; sequence-specific DNA binding; DNA-binding transcription activator activity, RNA polymerase II-specific; R-SMAD binding	nucleus; nucleolus; cytosol; nuclear chromatin
LMO2	6.19491e-14	0.239793	0.149	0.065	2.2674e-09	positive regulation of transcription by RNA polymerase II; regulation of hematopoietic stem cell differentiation; multicellular organism development; cellular response to thyroid hormone stimulus; mRNA transcription by RNA polymerase II	metal ion binding; protein binding; RNA polymerase II regulatory region sequence-specific DNA binding; DNA-binding transcription activator activity, RNA polymerase II-specific; bHLH transcription factor binding; DNA-binding transcription factor activity, RNA polymerase II-specific; RNA polymerase II activating transcription factor binding; E-box binding; cofactor binding	nucleus; nucleoplasm; transcription factor complex
RAB13	6.22889e-14	0.233239	0.521	0.382	2.27984e-09	protein transport; intracellular protein transport; Rab protein signal transduction; protein secretion; post-translational protein modification; endosomal transport; cellular response to insulin stimulus; neuron projection development; protein localization to plasma membrane; cortical actin cytoskeleton organization; endocytic recycling; bicellular tight junction assembly; regulation of exocytosi…	nucleotide binding; GTPase activity; GTP binding; protein binding	membrane; cytosol; plasma membrane; cell projection; cell junction; cytoplasmic vesicle; cytoplasmic vesicle membrane; endosome; bicellular tight junction; lamellipodium; extracellular exosome; trans-Golgi network; recycling endosome; recycling endosome membrane; synaptic vesicle; lateral plasma membrane; neuron projection; endocytic vesicle; trans-Golgi network transport vesicle; insulin-respons…
SMS	8.37141e-14	0.344692	0.762	0.713	3.06402e-09	spermine biosynthetic process; polyamine biosynthetic process; polyamine metabolic process; methionine metabolic process; spermine metabolic process	transferase activity; spermine synthase activity	cytosol; extracellular exosome
2003-08-01	8.61702e-14	-0.266287	0.44	0.578	3.15392e-09	translational initiation; nucleic acid phosphodiester bond hydrolysis; RNA phosphodiester bond hydrolysis, endonucleolytic; gene silencing by RNA; regulation of translation; regulation of megakaryocyte differentiation; Wnt signaling pathway, calcium modulating pathway; pre-miRNA processing; production of miRNAs involved in gene silencing by miRNA; mRNA catabolic process; miRNA mediated inhibition…	translation initiation factor activity; protein binding; nucleic acid binding; RNA binding; metal ion binding; hydrolase activity; endonuclease activity; nuclease activity; endoribonuclease activity; double-stranded RNA binding; miRNA binding; single-stranded RNA binding; endoribonuclease activity, cleaving miRNA-paired mRNA	nucleoplasm; cytoplasmic ribonucleoprotein granule; cytoplasm; membrane; P-body; RISC complex; cytosol; RISC-loading complex; condensed nuclear chromosome
MARCKS	9.78449e-14	-0.191257	0.987	0.997	3.58122e-09	actin filament bundle assembly; protein homooligomerization; actin crosslink formation	actin binding; calmodulin binding; actin filament binding; protein kinase C binding; identical protein binding	cytoplasm; membrane; cytoskeleton; focal adhesion; plasma membrane; extracellular exosome; actin cytoskeleton; centrosome; cell cortex; actin filament bundle; germinal vesicle
IL33	1.04078e-13	-0.156813	0.032	0.116	3.80935e-09	positive regulation of inflammatory response; positive regulation of transcription by RNA polymerase II; positive regulation of neuroinflammatory response; positive regulation of macrophage activation; protein deubiquitination; macrophage activation involved in immune response; microglial cell activation involved in immune response; negative regulation of leukocyte migration; negative regulation …	protein binding; cytokine activity	nucleus; chromosome; extracellular space; extracellular region; cytoplasmic vesicle; nucleoplasm; transport vesicle
ILDR2	1.30526e-13	0.171625	0.188	0.093	4.77737e-09	response to glucose; insulin secretion; cell differentiation; pancreas development; homeostasis of number of cells within a tissue		membrane; integral component of membrane; endoplasmic reticulum; endoplasmic reticulum membrane
HSPB1	1.33389e-13	-0.259113	0.819	0.882	4.88216e-09	positive regulation of blood vessel endothelial cell migration; positive regulation of angiogenesis; cellular response to vascular endothelial growth factor stimulus; negative regulation of protein kinase activity; negative regulation of apoptotic process; negative regulation of protein serine/threonine kinase activity; response to unfolded protein; retina homeostasis; regulation of mRNA stabilit…	RNA binding; protein homodimerization activity; protein binding; identical protein binding; protein kinase binding; ubiquitin binding; protein folding chaperone; protein kinase C binding; protein kinase C inhibitor activity	nucleus; cytoplasm; extracellular space; axon cytoplasm; cytoskeleton; focal adhesion; spindle; cytosol; extracellular exosome; proteasome complex; plasma membrane; Z disc; contractile fiber
RAMP2	1.36821e-13	-0.167879	0.103	0.214	5.0078e-09	intracellular protein transport; regulation of G protein-coupled receptor signaling pathway; protein transport; G protein-coupled receptor signaling pathway; response to hypoxia; sprouting angiogenesis; heart development; female pregnancy; regulation of blood pressure; positive regulation of gene expression; receptor internalization; response to estradiol; response to progesterone; cellular respo…	coreceptor activity; obsolete protein transporter activity; protein binding; amylin receptor activity; adrenomedullin receptor activity; adrenomedullin binding	cell; membrane; integral component of membrane; cytoplasm; plasma membrane; cell surface; receptor complex; lysosome; integral component of plasma membrane; clathrin-coated pit; amylin receptor complex 2; adrenomedullin receptor complex
EEF1A1	2.17805e-13	0.109962	1	1	7.97189e-09	translation; translational elongation; neutrophil degranulation; cellular response to epidermal growth factor stimulus; regulation of chaperone-mediated autophagy; regulation of D-erythro-sphingosine kinase activity	RNA binding; nucleotide binding; GTPase activity; GTP binding; protein binding; translation elongation factor activity; tRNA binding; protein kinase binding; kinase binding	nucleus; cytoplasm; membrane; extracellular space; cytosol; plasma membrane; nucleolus; extracellular region; extracellular exosome; ruffle membrane; secretory granule lumen; ficolin-1-rich granule lumen; cortical actin cytoskeleton; eukaryotic translation elongation factor 1 complex; cytoplasmic side of lysosomal membrane
ALKBH2	2.72328e-13	-0.184528	0.142	0.263	9.96748e-09	oxidation-reduction process; DNA repair; cellular response to DNA damage stimulus; oxidative demethylation; DNA dealkylation involved in DNA repair; oxidative DNA demethylation; DNA demethylation	metal ion binding; oxidoreductase activity; dioxygenase activity; ferrous iron binding; 1-ethyladenine demethylase activity; DNA-N1-methyladenine dioxygenase activity; cytosine C-5 DNA demethylase activity; 2-oxoglutarate-dependent dioxygenase activity	nucleus; nucleoplasm; microtubule cytoskeleton
EXOC6	2.85989e-13	0.214771	0.348	0.225	1.04675e-08	vesicle docking involved in exocytosis; protein transport; exocytosis; Golgi to plasma membrane transport	protein binding	exocyst; cytoplasm; cell projection; perinuclear region of cytoplasm; plasma membrane; cytosol; growth cone; Flemming body
SCRN1	3.43749e-13	-0.26208	0.546	0.668	1.25815e-08	exocytosis; proteolysis	protein binding; dipeptidase activity	nucleus; cytoplasm; nuclear membrane
ELFN1	3.5675e-13	0.151143	0.172	0.081	1.30574e-08	negative regulation of phosphoprotein phosphatase activity; negative regulation of phosphatase activity; synapse organization	protein phosphatase inhibitor activity; protein binding	membrane; integral component of membrane; cell projection; dendrite; extracellular space; extracellular matrix; excitatory synapse
THRA	3.63907e-13	-0.209279	0.181	0.308	1.33194e-08	regulation of transcription, DNA-templated; intracellular receptor signaling pathway; steroid hormone mediated signaling pathway; animal organ morphogenesis; cell differentiation; positive regulation of transcription by RNA polymerase II; negative regulation of transcription by RNA polymerase II; transcription by RNA polymerase II; hormone-mediated signaling pathway; multicellular organism develo…	zinc ion binding; DNA-binding transcription factor activity; sequence-specific DNA binding; metal ion binding; DNA binding; nuclear receptor activity; transcription regulatory region DNA binding; protein binding; steroid hormone receptor activity; DNA-binding transcription factor activity, RNA polymerase II-specific; RNA polymerase II regulatory region sequence-specific DNA binding; transcription…	nucleus; cytoplasm; cytosol; nuclear chromatin; nucleoplasm; RNA polymerase II transcription factor complex
TLE1	4.03747e-13	0.359745	0.635	0.545	1.47776e-08	regulation of transcription, DNA-templated; Wnt signaling pathway; negative regulation of canonical Wnt signaling pathway; positive regulation of gene expression; negative regulation of Wnt signaling pathway; signal transduction; multicellular organism development; negative regulation of transcription, DNA-templated; beta-catenin-TCF complex assembly; animal organ morphogenesis; negative regulati…	protein binding; identical protein binding; transcription corepressor activity; repressing transcription factor binding; transcription factor binding	nucleus; nucleoplasm; cytosol; transcription factor complex; beta-catenin-TCF complex
TPM1	4.4587e-13	0.37624	0.572	0.466	1.63193e-08	negative regulation of vascular smooth muscle cell proliferation; negative regulation of vascular associated smooth muscle cell migration; negative regulation of cell migration; cellular response to reactive oxygen species; regulation of cell shape; actin filament organization; ruffle organization; positive regulation of stress fiber assembly; muscle contraction; cardiac muscle contraction; ventr…	actin binding; protein homodimerization activity; protein binding; actin filament binding; identical protein binding; protein heterodimerization activity; cytoskeletal protein binding; structural constituent of muscle; structural constituent of cytoskeleton	cytoplasm; cytosol; actin cytoskeleton; cytoskeleton; actin filament; ruffle membrane; sarcomere; muscle thin filament tropomyosin; stress fiber; bleb; membrane; integral component of membrane
C1QL1	6.42308e-13	-0.13437	0.03	0.109	2.35091e-08	locomotory behavior; neuron remodeling; motor learning; maintenance of synapse structure	protein binding; signaling receptor binding	extracellular region; collagen trimer; cytoplasm; synaptic cleft; climbing fiber; presynapse
FOXN2	6.57755e-13	-0.211215	0.133	0.243	2.40745e-08	regulation of transcription, DNA-templated; regulation of transcription by RNA polymerase II; skeletal muscle cell differentiation	DNA binding; DNA-binding transcription factor activity; sequence-specific DNA binding; protein binding; DNA-binding transcription factor activity, RNA polymerase II-specific	nucleus; intracellular membrane-bounded organelle; nuclear chromatin
RHOBTB3	8.49078e-13	-0.212813	0.667	0.775	3.10771e-08	vesicle-mediated transport; motor neuron axon guidance; retrograde transport, endosome to Golgi; Rho protein signal transduction; regulation of cell shape; actin cytoskeleton organization; actin filament organization; regulation of actin cytoskeleton organization; engulfment of apoptotic cell; establishment or maintenance of cell polarity; male gonad development	GTPase activity; GTP binding; ATPase activity; Rab GTPase binding; nucleotide binding; ATP binding; hydrolase activity; protein binding; protein kinase binding	cytosol; Golgi apparatus; cytoplasm; plasma membrane; extracellular exosome; cell cortex; trans-Golgi network membrane; cell projection
CFAP36	8.82226e-13	0.254305	0.593	0.477	3.22903e-08		protein binding; protein N-terminus binding	nucleus; cytoplasm; motile cilium; cell projection; cilium; ciliary transition zone; ciliary base
CSRNP3	9.38571e-13	0.233701	0.325	0.213	3.43526e-08	apoptotic process; positive regulation of transcription by RNA polymerase II; positive regulation of apoptotic process; negative regulation of phosphatase activity	DNA binding; DNA-binding transcription factor activity; DNA-binding transcription factor activity, RNA polymerase II-specific; DNA-binding transcription activator activity, RNA polymerase II-specific; sequence-specific DNA binding	nucleus; nuclear chromatin
AC067773.1	9.67749e-13	-0.159449	0.077	0.178	3.54206e-08
PAK1	9.72853e-13	-0.222871	0.159	0.274	3.56074e-08	positive regulation of cell population proliferation; protein phosphorylation; phosphorylation; exocytosis; metabolic process; cellular response to DNA damage stimulus; apoptotic process; Fc-epsilon receptor signaling pathway; Fc-gamma receptor signaling pathway involved in phagocytosis; T cell receptor signaling pathway; neuron projection morphogenesis; positive regulation of protein phosphoryla…	nucleotide binding; protein kinase activity; protein serine/threonine kinase activity; ATP binding; kinase activity; transferase activity; protein binding; catalytic activity; collagen binding; Rac GTPase binding; protein kinase binding	nucleus; cytoplasm; membrane; cytosol; plasma membrane; chromosome; cell projection; cell junction; nucleoplasm; focal adhesion; dendrite; axon; ruffle membrane; protein-containing complex; nuclear membrane; invadopodium; Z disc; ruffle; intercalated disc; cell-cell junction; actin filament; lamellipodium
RPL21	9.92326e-13	0.123474	1	1	3.63201e-08	translation; viral transcription; translational initiation; nuclear-transcribed mRNA catabolic process, nonsense-mediated decay; SRP-dependent cotranslational protein targeting to membrane	RNA binding; structural constituent of ribosome; protein binding	cytoplasm; membrane; endoplasmic reticulum; ribosome; cytosol; cytosolic large ribosomal subunit; intracellular
POLE4	1.04103e-12	-0.20245	0.266	0.406	3.81027e-08	DNA biosynthetic process; regulation of transcription, DNA-templated; G1/S transition of mitotic cell cycle; histone H3 acetylation; DNA replication initiation; telomere maintenance via semi-conservative replication	transferase activity; DNA binding; protein heterodimerization activity; protein binding; nucleotidyltransferase activity; DNA-directed DNA polymerase activity; DNA-binding transcription factor activity	nucleus; nucleoplasm; Ada2/Gcn5/Ada3 transcription activator complex; epsilon DNA polymerase complex
DNALI1	1.05348e-12	0.210096	0.267	0.161	3.85586e-08		motor activity; protein binding; dynein heavy chain binding	cytoplasm; cell projection; dynein complex; cilium; axoneme; filopodium; 9+2 motile cilium
GAREM1	1.21041e-12	0.174359	0.172	0.084	4.4302e-08	positive regulation of cell division; positive regulation of ERK1 and ERK2 cascade; positive regulation of cell population proliferation; epidermal growth factor receptor signaling pathway; cellular response to epidermal growth factor stimulus	protein binding; proline-rich region binding	plasma membrane
MAP6	1.46284e-12	0.242632	0.413	0.289	5.35412e-08	microtubule cytoskeleton organization; cytoskeleton-dependent intracellular transport; regulation of microtubule cytoskeleton organization; positive regulation of axonogenesis; lysosome localization; dendrite morphogenesis	microtubule binding; calmodulin binding; protein binding	cytoplasm; membrane; Golgi apparatus; cytoskeleton; cell projection; perinuclear region of cytoplasm; cytoplasmic vesicle; microtubule; dendrite; cis-Golgi network; axon; transport vesicle membrane; Golgi-associated vesicle
RPL11	1.58754e-12	0.130746	1	1	5.81054e-08	translation; cytoplasmic translation; rRNA processing; ribosomal large subunit assembly; viral transcription; ribosomal large subunit biogenesis; negative regulation of proteasomal ubiquitin-dependent protein catabolic process; protein targeting; translational initiation; protein localization to nucleus; nuclear-transcribed mRNA catabolic process, nonsense-mediated decay; SRP-dependent cotranslat…	RNA binding; structural constituent of ribosome; protein binding; rRNA binding; ubiquitin protein ligase binding; 5S rRNA binding; ubiquitin ligase inhibitor activity	nucleus; cytoplasm; membrane; ribosome; nucleoplasm; nucleolus; cytosolic large ribosomal subunit; cytosol; extracellular exosome; protein-containing complex; polysomal ribosome; intracellular
TMEM132A	1.6445e-12	-0.217946	0.312	0.45	6.01904e-08	cellular protein metabolic process; post-translational protein modification		membrane; integral component of membrane; endoplasmic reticulum; endoplasmic reticulum membrane; Golgi apparatus; Golgi membrane; extracellular exosome; endoplasmic reticulum lumen
HELLS	1.72699e-12	-0.270946	0.408	0.541	6.32096e-08	cell division; cell cycle; multicellular organism development; maintenance of DNA methylation; lymphocyte proliferation; pericentric heterochromatin assembly; methylation-dependent chromatin silencing; urogenital system development; DNA methylation; chromatin silencing; negative regulation of apoptotic process; cellular response to leukemia inhibitory factor; negative regulation of intrinsic apop…	nucleotide binding; ATP binding; hydrolase activity; protein binding; helicase activity; chromatin binding	nucleus; chromosome, centromeric region; pericentric heterochromatin
PBX3	1.80411e-12	0.253289	0.312	0.203	6.60323e-08	regulation of transcription, DNA-templated; anterior compartment pattern formation; posterior compartment specification; regulation of respiratory gaseous exchange by nervous system process; respiratory gaseous exchange by respiratory system; adult locomotory behavior; dorsal spinal cord development; positive regulation of transcription by RNA polymerase II; neuron development	DNA binding; DNA-binding transcription factor activity; sequence-specific DNA binding; DNA-binding transcription factor activity, RNA polymerase II-specific; RNA polymerase II distal enhancer sequence-specific DNA binding; DNA-binding transcription activator activity, RNA polymerase II-specific; protein binding	nucleus; nuclear chromatin; transcription factor complex
TKT	2.03089e-12	-0.240742	0.775	0.859	7.43327e-08	pentose-phosphate shunt; xylulose biosynthetic process; pentose-phosphate shunt, non-oxidative branch; glyceraldehyde-3-phosphate biosynthetic process; regulation of growth	metal ion binding; transferase activity; catalytic activity; protein homodimerization activity; protein binding; cofactor binding; transketolase activity	nuclear speck; nucleoplasm; nuclear body; peroxisome; cytosol; extracellular exosome; vesicle
PLCB1	2.06284e-12	-0.195074	0.279	0.418	7.55021e-08	intracellular signal transduction; signal transduction; lipid metabolic process; lipid catabolic process; regulation of cell cycle; brain development; positive regulation of G1/S transition of mitotic cell cycle; positive regulation of transcription, DNA-templated; positive regulation of GTPase activity; G protein-coupled receptor signaling pathway; memory; positive regulation of interleukin-12 p…	hydrolase activity; calcium ion binding; phosphoric diester hydrolase activity; phosphatidylinositol phospholipase C activity; protein binding; calmodulin binding; protein homodimerization activity; enzyme binding; GTPase activator activity; phospholipase C activity; phosphatidylinositol-4,5-bisphosphate binding; lamin binding	nucleus; cytoplasm; membrane; postsynapse; cytosol; extracellular exosome; nuclear membrane; nuclear speck; nuclear chromatin; protein-containing complex; glutamatergic synapse; GABA-ergic synapse
USP1	2.068e-12	-0.259962	0.439	0.568	7.56908e-08	protein deubiquitination; ubiquitin-dependent protein catabolic process; proteolysis; DNA repair; cellular response to DNA damage stimulus; interstrand cross-link repair; response to UV; skeletal system development; regulation of DNA repair; monoubiquitinated protein deubiquitination; DNA damage response, detection of DNA damage	thiol-dependent ubiquitinyl hydrolase activity; hydrolase activity; protein binding; peptidase activity; cysteine-type peptidase activity; cysteine-type endopeptidase activity; thiol-dependent ubiquitin-specific protease activity	nucleus; nucleoplasm
FGFR1	2.09592e-12	0.273526	0.68	0.592	7.67127e-08	protein phosphorylation; phosphorylation; positive regulation of cell population proliferation; peptidyl-tyrosine phosphorylation; fibroblast growth factor receptor signaling pathway; positive regulation of blood vessel endothelial cell migration; positive regulation of vascular endothelial cell proliferation; phosphatidylinositol-mediated signaling; transmembrane receptor protein tyrosine kinase…	nucleotide binding; protein kinase activity; ATP binding; kinase activity; transferase activity; protein tyrosine kinase activity; transmembrane receptor protein tyrosine kinase activity; fibroblast growth factor-activated receptor activity; protein homodimerization activity; protein binding; identical protein binding; heparin binding; fibroblast growth factor binding; receptor-receptor interacti…	membrane; integral component of membrane; nucleus; cytoplasm; nucleolus; cytosol; plasma membrane; extracellular region; cytoplasmic vesicle; integral component of plasma membrane; receptor complex
PAG1	2.33124e-12	-0.205131	0.175	0.294	8.53257e-08	intracellular signal transduction; positive regulation of signal transduction; immune system process; adaptive immune response; T cell receptor signaling pathway; signal transduction; negative regulation of T cell activation; regulation of T cell activation	protein binding; SH3/SH2 adaptor activity; SH2 domain binding	membrane; integral component of membrane; plasma membrane; membrane raft
RPS2	2.40821e-12	0.118408	1	1	8.81429e-08	translation; viral transcription; translational initiation; rRNA processing; nuclear-transcribed mRNA catabolic process, nonsense-mediated decay; SRP-dependent cotranslational protein targeting to membrane; positive regulation of ubiquitin-protein transferase activity	RNA binding; structural constituent of ribosome; protein binding; mRNA binding; cadherin binding; enzyme binding; fibroblast growth factor binding	nucleus; membrane; ribosome; small ribosomal subunit; cytosolic small ribosomal subunit; nucleoplasm; focal adhesion; cytosol; extracellular exosome; ribonucleoprotein complex
TFAP2C	2.43437e-12	-0.198158	0.146	0.262	8.91003e-08	positive regulation of transcription by RNA polymerase II; regulation of transcription, DNA-templated; regulation of transcription by RNA polymerase II; male gonad development; cell-cell signaling; regulation of gene expression, epigenetic; negative regulation of transcription by RNA polymerase II	DNA binding; DNA-binding transcription factor activity; protein binding; DNA-binding transcription factor activity, RNA polymerase II-specific; RNA polymerase II regulatory region sequence-specific DNA binding; RNA polymerase II proximal promoter sequence-specific DNA binding; DNA-binding transcription repressor activity, RNA polymerase II-specific; DNA-binding transcription activator activity, R…	nucleus; nucleoplasm; mitochondrion; nuclear chromatin; cytosol
NAV1	2.53823e-12	0.259985	0.33	0.223	9.29016e-08	neurogenesis; multicellular organism development; cell differentiation; nervous system development; microtubule bundle formation; neuron migration		cytoplasm; cytoskeleton; microtubule; microtubule cytoskeleton; axon initial segment
CHIC2	2.62998e-12	0.141113	0.145	0.065	9.62598e-08		protein binding	membrane; intracellular membrane-bounded organelle; plasma membrane; cytoplasmic vesicle; Golgi-associated vesicle; Golgi apparatus
PARP1	2.63231e-12	-0.227967	0.816	0.883	9.63453e-08	cellular response to insulin stimulus; DNA repair; cellular response to DNA damage stimulus; apoptotic process; protein ADP-ribosylation; double-strand break repair; transforming growth factor beta receptor signaling pathway; response to gamma radiation; positive regulation of cardiac muscle hypertrophy; regulation of SMAD protein complex assembly; protein autoprocessing; signal transduction invo…	RNA binding; zinc ion binding; metal ion binding; transferase activity; DNA binding; transferase activity, transferring glycosyl groups; protein binding; NAD binding; NAD+ ADP-ribosyltransferase activity; enzyme binding; estrogen receptor binding; histone deacetylase binding; SMAD binding; R-SMAD binding; identical protein binding; protein kinase binding; DNA-binding transcription activator activ…	nucleus; membrane; chromosome; cytoplasm; nucleolus; nucleoplasm; nuclear chromosome, telomeric region; site of double-strand break; protein-containing complex; transcription factor complex; mitochondrion; nuclear envelope; protein-DNA complex; site of DNA damage
CXADR	2.88307e-12	0.227085	0.387	0.268	1.05523e-07	cell adhesion; viral entry into host cell; regulation of immune response; leukocyte migration; neutrophil chemotaxis; mitochondrion organization; heart development; viral process; actin cytoskeleton reorganization; heterophilic cell-cell adhesion via plasma membrane cell adhesion molecules; cardiac muscle fiber development; regulation of AV node cell action potential; cell-cell junction organizat…	protein binding; integrin binding; beta-catenin binding; PDZ domain binding; virus receptor activity; cell adhesion molecule binding; connexin binding; cell adhesive protein binding involved in AV node cell-bundle of His cell communication	membrane; integral component of membrane; nucleoplasm; plasma membrane; cell junction; extracellular region; membrane raft; integral component of plasma membrane; bicellular tight junction; filopodium; growth cone; acrosomal vesicle; basolateral plasma membrane; protein-containing complex; adherens junction; cell-cell adherens junction; neuron projection; cell-cell junction; apicolateral plasma m…
ITGA6	2.8847e-12	0.229574	0.298	0.188	1.05583e-07	cell adhesion; integrin-mediated signaling pathway; positive regulation of cell migration; positive regulation of transcription by RNA polymerase II; leukocyte migration; positive regulation of GTPase activity; extracellular matrix organization; positive regulation of phosphorylation; positive regulation of neuron projection development; cell-substrate adhesion; renal system development; skin dev…	metal ion binding; protein binding; cadherin binding; insulin-like growth factor I binding; neuregulin binding; laminin binding; protein-containing complex binding	membrane; integrin complex; integral component of membrane; plasma membrane; cell surface; focal adhesion; basement membrane; cell-cell adherens junction; external side of plasma membrane; basal plasma membrane; basolateral plasma membrane; hemidesmosome; filopodium; integrin alpha6-beta4 complex; basal part of cell
SLIRP	2.99419e-12	-0.219149	0.788	0.852	1.0959e-07	mitochondrion morphogenesis; negative regulation of mitochondrial RNA catabolic process; spermatid development; single fertilization; flagellated sperm motility	nucleic acid binding; RNA binding; protein binding	nucleus; mitochondrion; ribonucleoprotein complex; acrosomal vesicle; cytoplasm; sperm flagellum; perinuclear region of cytoplasm
SEC11A	3.16766e-12	0.208779	0.829	0.772	1.1594e-07	proteolysis; signal peptide processing	hydrolase activity; peptidase activity; serine-type peptidase activity	membrane; integral component of membrane; endoplasmic reticulum; endoplasmic reticulum membrane; organelle membrane; intracellular membrane-bounded organelle; signal peptidase complex
NCKAP5	3.1732e-12	-0.192559	0.181	0.303	1.16142e-07	microtubule depolymerization; microtubule bundle formation		microtubule plus-end
MIF	3.23271e-12	-0.183152	0.994	0.995	1.1832e-07	negative regulation of cell migration; negative regulation of gene expression; positive regulation of ERK1 and ERK2 cascade; positive regulation of fibroblast proliferation; negative regulation of apoptotic process; inflammatory response; immune system process; innate immune response; leukocyte migration; positive chemotaxis; cell population proliferation; neutrophil degranulation; positive regul…	isomerase activity; protein binding; cytokine activity; identical protein binding; protease binding; phenylpyruvate tautomerase activity; signaling receptor binding; chemoattractant activity; dopachrome isomerase activity; cytokine receptor binding	extracellular space; cytoplasm; plasma membrane; cytosol; nucleoplasm; extracellular region; extracellular exosome; cell surface; secretory granule lumen; ficolin-1-rich granule lumen; vesicle
FAM171B	3.96857e-12	-0.226568	0.562	0.687	1.45254e-07			membrane; integral component of membrane
STON2	3.99209e-12	-0.131035	0.044	0.126	1.46115e-07	endocytosis; regulation of endocytosis; synaptic vesicle recycling; membrane organization; synaptic vesicle endocytosis; hematopoietic progenitor cell differentiation	protein binding	cytoplasm; membrane; nucleolus; cytosol; cell junction; synapse; neuron projection; synaptic vesicle; clathrin-coated vesicle; presynapse; cell
CDCA7	4.4493e-12	-0.207737	0.191	0.309	1.62849e-07	regulation of transcription, DNA-templated; apoptotic process; regulation of cell population proliferation		nucleus; cytoplasm; cytosol; nucleoplasm
SFRP1	4.72656e-12	-0.202202	0.979	0.986	1.72997e-07	negative regulation of cell population proliferation; negative regulation of canonical Wnt signaling pathway; negative regulation of fibroblast proliferation; negative regulation of apoptotic process; proteolysis; multicellular organism development; Wnt signaling pathway; cell differentiation; positive regulation of Wnt signaling pathway; positive regulation of transcription, DNA-templated; canon…	protein binding; heparin binding; Wnt-protein binding; drug binding; frizzled binding; identical protein binding; cysteine-type endopeptidase activity	extracellular space; cytosol; plasma membrane; extracellular region; cell surface; extracellular exosome; collagen-containing extracellular matrix
ELOB	5.35023e-12	-0.19314	0.954	0.975	1.95824e-07	protein ubiquitination; transcription elongation from RNA polymerase II promoter; post-translational protein modification; regulation of transcription from RNA polymerase II promoter in response to hypoxia; transcription by RNA polymerase II; protein-containing complex assembly; translational elongation	protein binding; ubiquitin protein ligase binding; translation elongation factor activity	nucleus; elongin complex; VCB complex; nucleoplasm; cytosol; Cul5-RING ubiquitin ligase complex; Cul2-RING ubiquitin ligase complex
BTBD6	5.43494e-12	-0.136107	0.083	0.179	1.98924e-07	post-translational protein modification; neurogenesis	protein binding	cytoplasm; cytosol
PRKAG2-AS1	6.75724e-12	-0.115151	0.04	0.12	2.47322e-07
GNAS	6.97606e-12	-0.147517	0.985	0.994	2.55331e-07	response to parathyroid hormone; female pregnancy; positive regulation of cold-induced thermogenesis; protein secretion; negative regulation of multicellular organism growth; G protein-coupled receptor signaling pathway; signal transduction; positive regulation of catalytic activity; bone development; adenylate cyclase-modulating G protein-coupled receptor signaling pathway; platelet aggregation;…	GTP binding; GTPase activity; G-protein beta/gamma-subunit complex binding; guanyl nucleotide binding; nucleotide binding; metal ion binding; protein binding; G protein-coupled receptor binding; mu-type opioid receptor binding; corticotropin-releasing hormone receptor 1 binding; adenylate cyclase activator activity; beta-2 adrenergic receptor binding; insulin-like growth factor receptor binding; …	nucleus; cytoplasm; extracellular region; perinuclear region of cytoplasm; cytoplasmic vesicle; transport vesicle; membrane; cytosol; plasma membrane; heterotrimeric G-protein complex; extracellular exosome; apical plasma membrane; dendrite; cell projection; ruffle; trans-Golgi network membrane; intrinsic component of membrane
DEK	7.15316e-12	-0.219138	0.901	0.938	2.61813e-07	chromatin organization; positive regulation of gene expression, epigenetic; signal transduction; transcription by RNA polymerase II; regulation of transcription by RNA polymerase II; viral genome replication; regulation of double-strand break repair	RNA binding; DNA binding; histone binding	nucleus; nucleoplasm
SOX2	7.17864e-12	-0.238292	0.918	0.955	2.62745e-07	regulation of transcription, DNA-templated; chromatin organization; multicellular organism development; positive regulation of transcription, DNA-templated; cell differentiation; adenohypophysis development; positive regulation of cell-cell adhesion; tissue regeneration; positive regulation of cell differentiation; positive regulation of transcription by RNA polymerase II; negative regulation of …	DNA binding; DNA-binding transcription factor activity; protein binding; DNA-binding transcription factor activity, RNA polymerase II-specific; transcription regulatory region sequence-specific DNA binding; DNA-binding transcription activator activity, RNA polymerase II-specific; transcription regulatory region DNA binding; sequence-specific DNA binding; miRNA binding	nucleus; cytoplasm; nucleoplasm; cytosol; nuclear transcription factor complex; nuclear chromatin; transcription factor complex
GLUL	8.92035e-12	0.280259	0.684	0.586	3.26494e-07	nitrogen compound metabolic process; glutamine biosynthetic process; ribosome biogenesis; cell population proliferation; angiogenesis; regulation of protein localization to nucleolus; cellular amino acid biosynthetic process; glutamate catabolic process; regulation of endothelial cell migration; regulation of sprouting angiogenesis; neurotransmitter uptake; protein palmitoylation; glutamate metab…	nucleotide binding; ATP binding; catalytic activity; ligase activity; glutamate-ammonia ligase activity; metal ion binding; transferase activity; protein-cysteine S-palmitoyltransferase activity; protein binding; identical protein binding; magnesium ion binding; glutamate binding; manganese ion binding; dynein light chain binding	nucleus; cytoplasm; membrane; cytosol; endoplasmic reticulum; intracellular membrane-bounded organelle; mitochondrion; plasma membrane; extracellular exosome; rough endoplasmic reticulum; protein-containing complex; cell projection; neuron projection; perikaryon; myelin sheath; axon terminus; cell body; glial cell projection
CHST10	9.58439e-12	-0.180882	0.157	0.272	3.50798e-07	carbohydrate metabolic process; carbohydrate biosynthetic process; cell adhesion; proteoglycan biosynthetic process	transferase activity; sulfotransferase activity; HNK-1 sulfotransferase activity	membrane; integral component of membrane; Golgi apparatus; Golgi membrane
FZD8	1.00274e-11	-0.244034	0.493	0.607	3.67011e-07	signal transduction; cell surface receptor signaling pathway; G protein-coupled receptor signaling pathway; multicellular organism development; Wnt signaling pathway; canonical Wnt signaling pathway; non-canonical Wnt signaling pathway; neuron differentiation; angiogenesis; positive regulation of protein phosphorylation; T cell differentiation in thymus; positive regulation of JUN kinase activity	protein binding; transmembrane signaling receptor activity; G protein-coupled receptor activity; Wnt-protein binding; Wnt-activated receptor activity; ubiquitin protein ligase binding; PDZ domain binding; signaling receptor binding	membrane; integral component of membrane; Golgi apparatus; plasma membrane; Wnt-Frizzled-LRP5/6 complex
PTGFRN	1.01866e-11	-0.18347	0.163	0.276	3.7284e-07	myoblast fusion involved in skeletal muscle regeneration; lipid droplet organization	protein binding	membrane; integral component of membrane; endoplasmic reticulum; endoplasmic reticulum membrane; Golgi apparatus; cell surface
HDAC9	1.05959e-11	-0.223173	0.249	0.37	3.87819e-07	positive regulation of cell migration involved in sprouting angiogenesis; cholesterol homeostasis; cellular response to insulin stimulus; chromatin organization; inflammatory response; histone deacetylation; B cell activation; negative regulation of transcription by RNA polymerase II; negative regulation of transcription, DNA-templated; heart development; B cell differentiation; negative regulati…	metal ion binding; hydrolase activity; protein binding; histone deacetylase activity; NAD-dependent histone deacetylase activity (H3-K14 specific); transcription factor binding; transcription corepressor activity; histone deacetylase binding; protein kinase C binding; repressing transcription factor binding; protein deacetylase activity; histone deacetylase activity (H4-K16 specific)	cytoplasm; nucleus; nucleoplasm; histone deacetylase complex; transcription factor complex; histone methyltransferase complex
POLD2	1.13896e-11	-0.237224	0.549	0.66	4.16872e-07	DNA repair; cellular response to DNA damage stimulus; DNA replication; translesion synthesis; transcription-coupled nucleotide-excision repair; DNA damage response, detection of DNA damage; nucleotide-excision repair, DNA incision, 5'-to lesion; nucleotide-excision repair, DNA incision; telomere maintenance via semi-conservative replication; nucleotide-excision repair, DNA gap filling; telomere m…	DNA binding; protein binding; DNA-directed DNA polymerase activity	nucleus; nucleoplasm; delta DNA polymerase complex; zeta DNA polymerase complex
RPS4X	1.18445e-11	0.148128	0.998	0.998	4.33522e-07	translation; multicellular organism development; positive regulation of translation; viral transcription; positive regulation of cell population proliferation; translational initiation; nuclear-transcribed mRNA catabolic process, nonsense-mediated decay; SRP-dependent cotranslational protein targeting to membrane	RNA binding; structural constituent of ribosome; rRNA binding; protein binding	cytoplasm; membrane; ribosome; cytosolic small ribosomal subunit; focal adhesion; nucleoplasm; cytosol; extracellular exosome; synapse; ribonucleoprotein complex; cytoplasmic ribonucleoprotein granule; polysome; small ribosomal subunit; intracellular
FAM181A	1.25265e-11	0.179584	0.183	0.097	4.58481e-07
KAZN	1.29577e-11	-0.191245	0.272	0.401	4.74266e-07	keratinization; cornification	protein binding	nuclear speck; cytosol; nucleoplasm; nucleus; cytoplasm; cytoskeleton; cell junction; desmosome; cornified envelope
MSI2	1.3251e-11	0.256527	0.719	0.638	4.84998e-07	stem cell development	nucleic acid binding; RNA binding; protein binding; single-stranded RNA binding; poly(U) RNA binding	cytoplasm; nucleus; ribonucleoprotein complex; polysome
ST8SIA4	1.41455e-11	0.138901	0.138	0.063	5.17741e-07	protein glycosylation; sialylation; nervous system development; cellular protein modification process; ganglioside biosynthetic process; N-glycan processing; oligosaccharide metabolic process	transferase activity; sialyltransferase activity; transferase activity, transferring glycosyl groups; alpha-N-acetylneuraminate alpha-2,8-sialyltransferase activity; sialic acid binding	membrane; integral component of membrane; Golgi apparatus; Golgi membrane
RORB	1.45177e-11	0.170289	0.118	0.05	5.31362e-07	regulation of transcription, DNA-templated; intracellular receptor signaling pathway; steroid hormone mediated signaling pathway; rhythmic process; multicellular organism development; positive regulation of transcription, DNA-templated; response to stimulus; G protein-coupled receptor signaling pathway; visual perception; negative regulation of transcription, DNA-templated; transcription initiati…	zinc ion binding; metal ion binding; DNA binding; DNA-binding transcription factor activity; sequence-specific DNA binding; protein binding; steroid hormone receptor activity; nuclear receptor activity; DNA-binding transcription factor activity, RNA polymerase II-specific; RNA polymerase II proximal promoter sequence-specific DNA binding; DNA-binding transcription activator activity, RNA polymera…	nucleus; nucleoplasm; nuclear chromatin
TIFA	1.46074e-11	-0.179413	0.191	0.306	5.34646e-07	I-kappaB kinase/NF-kappaB signaling; immune system process; innate immune response; protein homooligomerization; positive regulation of I-kappaB kinase/NF-kappaB signaling; cytoplasmic pattern recognition receptor signaling pathway	protein binding	cytoplasm
YPEL2	1.47509e-11	0.134965	0.132	0.058	5.39899e-07		metal ion binding	nucleus; nucleolus
TMEM161B-AS1	1.57511e-11	-0.210176	0.851	0.899	5.76506e-07
MSMO1	1.61728e-11	-0.307294	0.776	0.823	5.91941e-07	oxidation-reduction process; lipid metabolic process; steroid biosynthetic process; steroid metabolic process; sterol biosynthetic process; lipid biosynthetic process; cholesterol biosynthetic process; fatty acid metabolic process	oxidoreductase activity; iron ion binding; C-4 methylsterol oxidase activity	membrane; integral component of membrane; endoplasmic reticulum; endoplasmic reticulum membrane; plasma membrane
MORN2	1.67698e-11	0.228331	0.462	0.349	6.13791e-07	cell differentiation; spermatogenesis	protein binding	nucleus; cytoplasmic vesicle; acrosomal vesicle
B2M	1.79388e-11	0.298985	0.791	0.732	6.56577e-07	immune response; immune system process; regulation of immune response; antigen processing and presentation of peptide antigen via MHC class I; cellular protein metabolic process; retina homeostasis; antigen processing and presentation of exogenous peptide antigen via MHC class I, TAP-dependent; innate immune response; neutrophil degranulation; positive regulation of receptor-mediated endocytosis;…	protein binding; identical protein binding; protein homodimerization activity	membrane; Golgi apparatus; cytosol; plasma membrane; extracellular space; extracellular region; cell surface; focal adhesion; MHC class I protein complex; extracellular exosome; phagocytic vesicle membrane; HFE-transferrin receptor complex; endoplasmic reticulum lumen; specific granule lumen; tertiary granule lumen; Golgi membrane; ER to Golgi transport vesicle membrane; MHC class I peptide loadi…
LINC01473	1.93486e-11	0.150407	0.176	0.091	7.08179e-07
C12orf57	1.94478e-11	-0.190219	0.919	0.958	7.11811e-07	cognition; post-embryonic development; regulation of skeletal muscle contraction; corpus callosum morphogenesis; third ventricle development; psychomotor behavior; camera-type eye morphogenesis		cytoplasm; nuclear speck
LMO3	2.10271e-11	-0.218065	0.107	0.204	7.69611e-07	negative regulation of ERK1 and ERK2 cascade; positive regulation of fat cell differentiation; positive regulation of peroxisome proliferator activated receptor signaling pathway; positive regulation of glucocorticoid receptor signaling pathway	metal ion binding; protein binding	cytoplasm
ID4	2.29874e-11	-0.182206	0.937	0.957	8.41361e-07	negative regulation of transcription, DNA-templated; neuron differentiation; regulation of cell cycle; circadian rhythm; regulation of transcription by RNA polymerase II; negative regulation of DNA binding; negative regulation of neuron differentiation; G1/S transition of mitotic cell cycle; negative regulation of transcription by RNA polymerase II; osteoblast differentiation; neuroblast prolifer…	protein dimerization activity; protein binding; DNA-binding transcription factor activity; DNA-binding transcription factor activity, RNA polymerase II-specific; transcription factor binding; transcription corepressor activity; RNA polymerase II transcription factor binding	nucleus; cytoplasm
HNRNPDL	2.31055e-11	-0.1697	0.959	0.982	8.45685e-07	interleukin-12-mediated signaling pathway	nucleic acid binding; RNA binding; DNA binding; protein binding; sequence-specific DNA binding; poly(A) binding; poly(G) binding; sequence-specific double-stranded DNA binding	nucleus; cytoplasm; nucleoplasm; cytosol; ribonucleoprotein complex
PCNA	2.57401e-11	-0.248382	0.406	0.539	9.42114e-07	regulation of DNA replication; DNA repair; cellular response to DNA damage stimulus; DNA replication; protein ubiquitination; DNA damage response, signal transduction by p53 class mediator resulting in cell cycle arrest; positive regulation of DNA repair; viral process; epithelial cell differentiation; translesion synthesis; positive regulation of DNA replication; cellular response to UV; transcr…	DNA binding; protein binding; identical protein binding; chromatin binding; receptor tyrosine kinase binding; DNA polymerase binding; enzyme binding; damaged DNA binding; histone acetyltransferase binding; purine-specific mismatch base pair DNA N-glycosylase activity; DNA polymerase processivity factor activity; dinucleotide insertion or deletion binding; MutLalpha complex binding; estrogen recep…	nucleus; nucleoplasm; nuclear body; extracellular exosome; nuclear chromosome, telomeric region; chromatin; centrosome; nuclear replication fork; replication fork; replisome; PCNA complex; PCNA-p21 complex; cyclin-dependent protein kinase holoenzyme complex; nuclear lamina
CD24	2.76884e-11	0.22393	0.23	0.135	1.01342e-06	cell adhesion; Wnt signaling pathway; positive regulation of protein tyrosine kinase activity; cell migration; response to hypoxia; response to molecule of bacterial origin; positive regulation of cytosolic calcium ion concentration; intrinsic apoptotic signaling pathway; response to estrogen; cholesterol homeostasis; cell-cell adhesion; regulation of epithelial cell differentiation; glomerular v…	protein binding; protein kinase binding; protein tyrosine kinase activator activity	membrane; plasma membrane; membrane raft; cell surface; anchored component of membrane; anchored component of external side of plasma membrane; intracellular membrane-bounded organelle
ANKRD44	2.77169e-11	-0.141312	0.073	0.162	1.01447e-06		protein binding
LAPTM4A	2.98284e-11	-0.213954	0.598	0.707	1.09175e-06		protein binding	membrane; integral component of membrane; Golgi apparatus; lysosomal membrane; late endosome membrane; endomembrane system
PSIP1	3.08851e-11	-0.197599	0.942	0.962	1.13043e-06	mRNA 5'-splice site recognition; viral process; response to oxidative stress; response to heat; nuclear transport; establishment of integrated proviral latency	RNA binding; DNA binding; protein binding; supercoiled DNA binding	nucleus; nucleoplasm; cytosol; transcriptionally active chromatin
AMBN	3.35059e-11	-0.136866	0.055	0.139	1.22635e-06	signal transduction; odontogenesis of dentin-containing tooth; biomineral tissue development; cellular protein metabolic process; post-translational protein modification; cell adhesion; regulation of cell population proliferation	protein binding; structural constituent of tooth enamel; growth factor activity	extracellular region; endoplasmic reticulum lumen
AC010896.1	3.4474e-11	0.131025	0.108	0.044	1.26178e-06
BID	3.62364e-11	-0.205699	0.21	0.323	1.32629e-06	regulation of apoptotic process; apoptotic process; positive regulation of apoptotic process; activation of cysteine-type endopeptidase activity involved in apoptotic process; positive regulation of protein complex assembly; positive regulation of release of cytochrome c from mitochondria; extrinsic apoptotic signaling pathway via death domain receptors; apoptotic mitochondrial changes; positive …	protein binding; death receptor binding; ubiquitin protein ligase binding; protein heterodimerization activity	cytoplasm; membrane; cytosol; mitochondrion; mitochondrial outer membrane; mitochondrial membrane; integral component of mitochondrial membrane
AC090204.1	3.74185e-11	0.200572	0.26	0.162	1.36956e-06
OLFM1	3.99713e-11	-0.139091	0.092	0.189	1.46299e-06	nervous system development; multicellular organism development; positive regulation of apoptotic process; positive regulation of gene expression; cardiac epithelial to mesenchymal transition; negative regulation of gene expression; regulation of axon extension; neuronal signal transduction; atrioventricular valve formation; positive regulation of epithelial to mesenchymal transition	protein binding	endoplasmic reticulum; cell; extracellular space; cell projection; extracellular region; cell junction; synapse; axon; perikaryon; axonal growth cone; neuronal cell body
MRPS6	4.07508e-11	-0.224678	0.491	0.608	1.49152e-06	translation; mitochondrial translation; mitochondrial translational elongation; mitochondrial translational termination	structural constituent of ribosome; protein binding; rRNA binding; small ribosomal subunit rRNA binding	mitochondrion; ribosome; mitochondrial small ribosomal subunit; mitochondrial inner membrane; small ribosomal subunit
MVD	4.2542e-11	-0.280933	0.358	0.479	1.55708e-06	lipid metabolic process; steroid biosynthetic process; steroid metabolic process; isoprenoid biosynthetic process; sterol biosynthetic process; cholesterol metabolic process; cholesterol biosynthetic process; positive regulation of cell population proliferation; regulation of cholesterol biosynthetic process; dolichyl diphosphate biosynthetic process; isopentenyl diphosphate biosynthetic process,…	nucleotide binding; ATP binding; lyase activity; protein homodimerization activity; carboxy-lyase activity; Hsp70 protein binding; diphosphomevalonate decarboxylase activity	cytosol
KCTD6	4.35509e-11	0.248417	0.485	0.383	1.59401e-06	protein ubiquitination; protein homooligomerization; ubiquitin-dependent protein catabolic process; regulation of growth; post-translational protein modification; regulation of intracellular estrogen receptor signaling pathway; negative regulation of smoothened signaling pathway	protein binding; identical protein binding; cullin family protein binding; ankyrin binding	cytoplasm; cytosol; M band
APEX1	4.42246e-11	-0.244775	0.756	0.833	1.61866e-06	positive regulation of nucleic acid-templated transcription; DNA repair; nucleic acid phosphodiester bond hydrolysis; oxidation-reduction process; DNA recombination; cellular response to DNA damage stimulus; RNA phosphodiester bond hydrolysis, endonucleolytic; negative regulation of nucleic acid-templated transcription; base-excision repair; regulation of apoptotic process; DNA demethylation; tel…	RNA binding; metal ion binding; oxidoreductase activity; hydrolase activity; DNA binding; lyase activity; chromatin DNA binding; endonuclease activity; protein binding; nuclease activity; exonuclease activity; transcription coactivator activity; class I DNA-(apurinic or apyrimidinic site) endonuclease activity; RNA-DNA hybrid ribonuclease activity; DNA-(apurinic or apyrimidinic site) endonuclease…	nucleus; cytoplasm; nuclear speck; centrosome; endoplasmic reticulum; mitochondrion; ribosome; perinuclear region of cytoplasm; nucleoplasm; nucleolus; nuclear chromosome, telomeric region; intracellular; transcription factor complex
HNRNPF	4.68064e-11	-0.228908	0.583	0.701	1.71316e-06	mRNA processing; RNA splicing; mRNA splicing, via spliceosome; regulation of RNA splicing; interleukin-12-mediated signaling pathway; fibroblast growth factor receptor signaling pathway; RNA metabolic process; RNA processing	nucleic acid binding; RNA binding; protein binding; single-stranded RNA binding; transcription factor binding; TBP-class protein binding	nucleus; membrane; cytosol; nucleoplasm; spliceosomal complex; catalytic step 2 spliceosome; plasma membrane
DANCR	4.93756e-11	-0.190337	0.432	0.548	1.8072e-06
FUS	5.0223e-11	-0.198588	0.908	0.949	1.83821e-06	RNA splicing; regulation of transcription, DNA-templated; positive regulation of nucleic acid-templated transcription; protein homooligomerization; regulation of transcription by RNA polymerase II; regulation of RNA splicing; mRNA splicing, via spliceosome; positive regulation of double-strand break repair via homologous recombination; gene expression; mRNA stabilization; cellular response to cal…	nucleic acid binding; RNA binding; metal ion binding; DNA binding; protein binding; identical protein binding; chromatin binding; transcription coactivator activity; mRNA 3'-UTR binding; estrogen receptor binding; myosin V binding; ionotropic glutamate receptor binding; retinoid X receptor binding; thyroid hormone receptor binding	nucleus; nucleoplasm; cytoplasm; polysome; dendrite; neuronal cell body; dendritic spine; perikaryon; dendritic spine head; perinuclear region of cytoplasm
RPGR	5.19695e-11	0.141649	0.205	0.114	1.90214e-06	response to stimulus; intraciliary transport; cilium assembly; cell projection organization; visual perception; intracellular protein transport	RNA binding; protein binding; guanyl-nucleotide exchange factor activity	cytoplasm; Golgi apparatus; motile cilium; cytoskeleton; cell projection; centrosome; microtubule organizing center; cilium; ciliary basal body; photoreceptor outer segment; sperm flagellum
MRPS26	5.38326e-11	-0.189598	0.59	0.701	1.97033e-06	mitochondrial translational elongation; mitochondrial translational termination; DNA damage response, detection of DNA damage	RNA binding	nucleoplasm; mitochondrion; ribosome; mitochondrial small ribosomal subunit; mitochondrial inner membrane
DMRTA1	5.51648e-11	0.124745	0.163	0.083	2.01909e-06	regulation of transcription, DNA-templated; regulation of transcription by RNA polymerase II; ovarian follicle development; male mating behavior	metal ion binding; DNA binding; DNA-binding transcription factor activity; sequence-specific DNA binding; DNA-binding transcription factor activity, RNA polymerase II-specific; protein homodimerization activity; protein binding	nucleus; nuclear chromatin
AK3	5.52298e-11	0.196394	0.352	0.244	2.02147e-06	phosphorylation; nucleobase-containing compound metabolic process; ADP biosynthetic process; AMP metabolic process; nucleoside monophosphate phosphorylation; GTP metabolic process; blood coagulation; ITP metabolic process; UTP metabolic process	nucleotide binding; ATP binding; kinase activity; transferase activity; GTP binding; protein binding; nucleobase-containing compound kinase activity; phosphotransferase activity, phosphate group as acceptor; nucleoside triphosphate adenylate kinase activity; adenylate kinase activity	mitochondrion; mitochondrial matrix
SLC35F1	5.57507e-11	0.209751	0.442	0.332	2.04053e-06	transmembrane transport	transmembrane transporter activity	membrane; integral component of membrane
CSAD	5.72846e-11	-0.169868	0.152	0.258	2.09667e-06	carboxylic acid metabolic process; taurine biosynthetic process; L-cysteine catabolic process to hypotaurine; L-cysteine catabolic process to taurine	catalytic activity; lyase activity; carboxy-lyase activity; pyridoxal phosphate binding; aspartate 1-decarboxylase activity; sulfinoalanine decarboxylase activity	cytoplasm
TMEM35A	5.75102e-11	-0.155763	0.149	0.259	2.10493e-06			membrane; integral component of membrane; cytoplasmic vesicle; peroxisome; peroxisomal membrane
EMP2	6.20967e-11	-0.210107	0.279	0.409	2.2728e-06	cell adhesion; actin filament organization; early endosome to late endosome transport; cell migration; embryo implantation; positive regulation of cell population proliferation; cell death; protein localization to cell surface; cell-matrix adhesion; protein localization to plasma membrane; regulation of kinase activity; activation of protein kinase activity; membrane raft assembly; regulation of …	protein binding; protein kinase binding; kinase binding; integrin binding	nucleus; cytoplasm; membrane; integral component of membrane; cytosol; Golgi apparatus; plasma membrane; Golgi membrane; cytoplasmic vesicle; membrane raft; cell surface; apical plasma membrane; apical part of cell
CANX	6.50918e-11	0.244482	0.872	0.836	2.38243e-06	protein folding; antigen processing and presentation of exogenous peptide antigen via MHC class II; clathrin-dependent endocytosis; endoplasmic reticulum unfolded protein response; antigen processing and presentation of peptide antigen via MHC class I; synaptic vesicle endocytosis; interleukin-27-mediated signaling pathway; interleukin-35-mediated signaling pathway; protein secretion; protein fol…	calcium ion binding; unfolded protein binding; RNA binding; metal ion binding; carbohydrate binding; protein binding; apolipoprotein binding; ionotropic glutamate receptor binding	endoplasmic reticulum; membrane; integral component of membrane; endoplasmic reticulum membrane; melanosome; extracellular exosome; endoplasmic reticulum lumen; integral component of lumenal side of endoplasmic reticulum membrane; mitochondria-associated endoplasmic reticulum membrane; cytoplasm; smooth endoplasmic reticulum; rough endoplasmic reticulum; ribosome; axon; dendrite cytoplasm; protei…
ARL6IP6	6.57312e-11	-0.208705	0.405	0.528	2.40583e-06			nucleus; membrane; integral component of membrane; nuclear inner membrane
PTCH1	6.8398e-11	0.152972	0.2	0.11	2.50344e-06	cellular response to cholesterol; negative regulation of DNA-binding transcription factor activity; negative regulation of osteoblast differentiation; smoothened signaling pathway; pharyngeal system development; negative regulation of transcription by RNA polymerase II; animal organ morphogenesis; protein processing; dorsal/ventral pattern formation; negative regulation of multicellular organism …	protein binding; cholesterol binding; cyclin binding; patched binding; smoothened binding; hedgehog receptor activity; heparin binding; protein-containing complex binding; hedgehog family protein binding	perinuclear region of cytoplasm; membrane; integral component of membrane; plasma membrane; endocytic vesicle membrane; intracellular membrane-bounded organelle; caveola; Golgi apparatus; ciliary membrane; nucleus; cilium; postsynaptic density; midbody; dendritic growth cone; axonal growth cone
MLC1	7.58266e-11	-0.158095	0.085	0.176	2.77533e-06	ion transport; vesicle-mediated transport; protein complex oligomerization; cellular response to cholesterol; caveolin-mediated endocytosis; positive regulation of intracellular transport; regulation of response to osmotic stress; protein transport	protein binding; protein-containing complex binding	cytoplasm; membrane; integral component of membrane; endoplasmic reticulum; plasma membrane; caveola; perinuclear region of cytoplasm; cytoplasmic vesicle; membrane raft; lysosome; endosome; early endosome; basolateral plasma membrane; recycling endosome; cell-cell junction; apical plasma membrane
H2AFY	7.75857e-11	-0.200638	0.809	0.869	2.83971e-06	chromatin organization; nucleosome assembly; regulation of lipid metabolic process; negative regulation of transcription by RNA polymerase II; negative regulation of gene expression, epigenetic; negative regulation of histone H3-K27 methylation; dosage compensation; negative regulation of histone phosphorylation; positive regulation of maintenance of mitotic sister chromatid cohesion; regulation …	DNA binding; chromatin DNA binding; protein heterodimerization activity; protein binding; double-stranded methylated DNA binding; protein kinase binding; transcription regulatory region DNA binding; RNA polymerase II regulatory region sequence-specific DNA binding; enzyme binding; promoter-specific chromatin binding; rDNA binding; RNA polymerase II core promoter sequence-specific DNA binding; chr…	nucleus; nucleosome; nuclear chromatin; chromosome; nucleolus; extracellular exosome; nuclear chromosome, telomeric region; Barr body; nuclear chromosome; chromatin; condensed chromosome; sex chromatin; pericentric heterochromatin
MCM7	9.02448e-11	-0.259392	0.438	0.544	3.30305e-06	DNA replication initiation; cellular response to DNA damage stimulus; cell cycle; DNA replication; G1/S transition of mitotic cell cycle; double-strand break repair via break-induced replication; regulation of phosphorylation; DNA unwinding involved in DNA replication; pre-replicative complex assembly involved in nuclear cell cycle DNA replication; DNA strand elongation involved in DNA replicatio…	nucleotide binding; ATP binding; hydrolase activity; DNA binding; protein binding; DNA helicase activity; helicase activity; single-stranded DNA binding; DNA replication origin binding; single-stranded 3'-5' DNA helicase activity	nucleus; membrane; cytosol; nucleoplasm; MCM complex; nuclear chromosome, telomeric region; chromatin
RPSA	9.51974e-11	0.127374	0.999	1	3.48432e-06	translation; cell adhesion; cytoplasmic translation; ribosomal small subunit assembly; viral entry into host cell; viral process; viral transcription; translational initiation; nuclear-transcribed mRNA catabolic process, nonsense-mediated decay; SRP-dependent cotranslational protein targeting to membrane	RNA binding; structural constituent of ribosome; protein binding; laminin receptor activity; laminin binding; ribosome binding; virus receptor activity	nucleus; cytoplasm; membrane; ribosome; plasma membrane; small ribosomal subunit; cytosolic small ribosomal subunit; nucleoplasm; cytosol; extracellular exosome; intracellular
TCF7L2	1.01927e-10	0.233743	0.472	0.367	3.73064e-06	response to glucose; positive regulation of protein kinase B signaling; negative regulation of DNA-binding transcription factor activity; positive regulation of transcription by RNA polymerase II; glucose homeostasis; Wnt signaling pathway; regulation of transcription, DNA-templated; regulation of transcription by RNA polymerase II; canonical Wnt signaling pathway; negative regulation of canonica…	DNA binding; protein binding; sequence-specific DNA binding; DNA-binding transcription factor activity; DNA-binding transcription factor activity, RNA polymerase II-specific; protein kinase binding; armadillo repeat domain binding; beta-catenin binding; transcription regulatory region DNA binding; chromatin binding; RNA polymerase II repressing transcription factor binding; RNA polymerase II prox…	nucleus; transcription factor complex; nucleoplasm; PML body; nuclear chromatin; protein-DNA complex; beta-catenin-TCF7L2 complex
HYI	1.15641e-10	-0.104987	0.04	0.113	4.23259e-06	glyoxylate metabolic process	isomerase activity; hydroxypyruvate isomerase activity; protein binding
GAS1	1.22667e-10	0.341667	0.568	0.484	4.48973e-06	cell cycle; cell cycle arrest; regulation of apoptotic process; cellular response to vascular endothelial growth factor stimulus; negative regulation of mitotic cell cycle; cell fate commitment; regulation of smoothened signaling pathway; developmental growth; negative regulation of protein processing; regulation of ER to Golgi vesicle-mediated transport	protein binding	membrane; integral component of membrane; plasma membrane; anchored component of membrane; anchored component of plasma membrane
LRRN1	1.23017e-10	0.274004	0.345	0.243	4.50255e-06	positive regulation of synapse assembly	protein binding	membrane; integral component of membrane; extracellular space; extracellular matrix
ZNF804A	1.69596e-10	0.162123	0.166	0.087	6.20738e-06	positive regulation of gene expression; positive regulation of neuron projection development; regulation of neuron projection development; positive regulation of dendritic spine maintenance	nucleic acid binding; metal ion binding	nucleus; cytoplasm; plasma membrane; growth cone; dendritic spine; neuronal cell body; postsynapse; dendritic shaft; axon; presynapse; dendritic microtubule
GMNN	1.88928e-10	-0.225196	0.323	0.443	6.91497e-06	regulation of DNA replication; negative regulation of DNA replication; negative regulation of cell cycle; cell cycle; negative regulation of transcription, DNA-templated; G1/S transition of mitotic cell cycle; positive regulation of chromatin binding; DNA replication preinitiation complex assembly; negative regulation of DNA-dependent DNA replication; animal organ morphogenesis; protein-containin…	protein binding; histone deacetylase binding; chromatin binding; transcription corepressor activity; repressing transcription factor binding	nucleus; cytoplasm; cytosol; nucleoplasm
NOP58	2.04149e-10	-0.200421	0.436	0.562	7.47207e-06	ribosome biogenesis; rRNA processing; snoRNA localization	RNA binding; protein binding; snoRNA binding; TFIID-class transcription factor complex binding; ATPase binding	nucleus; membrane; cytosol; fibrillar center; nucleoplasm; nucleolus; small-subunit processome; box C/D snoRNP complex; small nucleolar ribonucleoprotein complex; pre-snoRNP complex; Cajal body
TUBB3	2.07344e-10	-0.154069	0.823	0.878	7.589e-06	cytoskeleton organization; microtubule-based process; microtubule cytoskeleton organization; mitotic cell cycle; axon guidance; neuron differentiation; netrin-activated signaling pathway; dorsal root ganglion development	nucleotide binding; GTPase activity; GTP binding; structural constituent of cytoskeleton; protein binding; netrin receptor binding	microtubule; nucleus; cytoplasm; cytoskeleton; cell projection; lamellipodium; filopodium; growth cone; extracellular exosome; dendrite; axon
FBLN1	2.154e-10	0.268169	0.523	0.435	7.88387e-06	extracellular matrix organization; positive regulation of peptidase activity; viral process; negative regulation of protein phosphorylation; negative regulation of cell adhesion; negative regulation of ERK1 and ERK2 cascade; negative regulation of substrate adhesion-dependent cell spreading; blood coagulation, fibrin clot formation; negative regulation of cell motility; negative regulation of ste…	protein binding; calcium ion binding; peptidase activator activity; fibronectin binding; identical protein binding; protein C-terminus binding; extracellular matrix structural constituent; protein-containing complex binding; fibrinogen binding	extracellular region; collagen-containing extracellular matrix; extracellular space; extracellular exosome; extracellular matrix; elastic fiber; basement membrane
AMMECR1	2.20196e-10	0.139219	0.154	0.078	8.05939e-06		protein binding	nucleus
GGCT	2.35069e-10	-0.196431	0.392	0.521	8.60375e-06	release of cytochrome c from mitochondria; glutathione biosynthetic process	gamma-glutamylcyclotransferase activity; lyase activity; protein homodimerization activity	cytosol; extracellular exosome
TRA2B	2.39042e-10	-0.202758	0.687	0.783	8.74919e-06	mRNA processing; RNA splicing; mRNA splicing, via spliceosome; positive regulation of mRNA splicing, via spliceosome; regulation of alternative mRNA splicing, via spliceosome; regulation of RNA splicing; protein complex oligomerization; RNA splicing, via transesterification reactions; cerebral cortex regionalization; cellular response to glucose stimulus; embryonic brain development	nucleic acid binding; RNA binding; protein binding; mRNA binding; identical protein binding; protein domain specific binding; pre-mRNA binding	nucleus; nucleoplasm; spliceosomal complex; ribonucleoprotein complex; nuclear inner membrane
AC245297.3	2.72229e-10	0.107494	0.137	0.065	9.96384e-06
GULP1	2.76779e-10	-0.188887	0.269	0.385	1.01304e-05	apoptotic process; lipid transport; phagocytosis; phagocytosis, engulfment	protein binding	cytoplasm
EML1	2.85603e-10	-0.155321	0.138	0.238	1.04533e-05	microtubule cytoskeleton organization; mitotic spindle organization; neuroblast proliferation; brain development; hematopoietic progenitor cell differentiation	protein binding; calcium ion binding; microtubule binding; tubulin binding	cytoplasm; cytosol; cytoskeleton; perinuclear region of cytoplasm; microtubule; microtubule cytoskeleton; mitotic spindle; mitotic spindle pole; mitotic spindle midzone; microtubule associated complex
RAMP1	2.87519e-10	-0.122802	0.059	0.137	1.05235e-05	intracellular protein transport; regulation of G protein-coupled receptor signaling pathway; protein transport; G protein-coupled receptor signaling pathway; calcium ion transport; angiogenesis; adenylate cyclase-activating G protein-coupled receptor signaling pathway; protein localization to plasma membrane; cellular response to hormone stimulus; receptor internalization; positive regulation of …	coreceptor activity; obsolete protein transporter activity; protein binding; amylin receptor activity; calcitonin gene-related peptide receptor activity; calcitonin gene-related peptide binding	cell; membrane; integral component of membrane; plasma membrane; cell surface; receptor complex; integral component of plasma membrane; extracellular space; amylin receptor complex 1; CGRP receptor complex
FAT4	2.91332e-10	-0.181943	0.237	0.35	1.0663e-05	cell adhesion; homophilic cell adhesion via plasma membrane adhesion molecules; hippo signaling; cerebral cortex development; cell-cell adhesion; neurogenesis; heterophilic cell-cell adhesion via plasma membrane cell adhesion molecules; branching involved in ureteric bud morphogenesis; kidney development; heart morphogenesis; plasma membrane organization; Notch signaling pathway; fibroblast growt…	calcium ion binding; protein binding	membrane; integral component of membrane; plasma membrane; extracellular exosome; apical part of cell
GNG5	2.949e-10	0.243659	0.928	0.92	1.07936e-05	G protein-coupled receptor signaling pathway; signal transduction	GTPase activity; protein binding; G-protein beta-subunit binding; PDZ domain binding	membrane; plasma membrane; heterotrimeric G-protein complex; G-protein beta/gamma-subunit complex; extracellular exosome
MVK	2.95382e-10	-0.153495	0.097	0.187	1.08113e-05	phosphorylation; negative regulation of inflammatory response; lipid metabolic process; steroid biosynthetic process; steroid metabolic process; isoprenoid biosynthetic process; sterol biosynthetic process; cholesterol metabolic process; cholesterol biosynthetic process; isopentenyl diphosphate biosynthetic process, mevalonate pathway; regulation of cholesterol biosynthetic process	ATP binding; kinase activity; metal ion binding; nucleotide binding; transferase activity; protein binding; magnesium ion binding; identical protein binding; mevalonate kinase activity	cytoplasm; cytosol; peroxisome
NBL1	3.03558e-10	0.12204	0.116	0.052	1.11105e-05	positive regulation of neuron differentiation; signal transduction; negative regulation of BMP signaling pathway; determination of dorsal identity; negative regulation of monocyte chemotaxis; nervous system development; sequestering of BMP in extracellular matrix; sequestering of BMP from receptor via BMP binding; neuron projection morphogenesis	protein homodimerization activity; protein binding; BMP binding; morphogen activity	extracellular space; extracellular region
H1FX	3.10947e-10	-0.249715	0.76	0.844	1.1381e-05	nucleosome assembly; regulation of transcription, DNA-templated; negative regulation of DNA recombination; nucleosome positioning; chromosome condensation; negative regulation of chromatin silencing	RNA binding; DNA binding; cadherin binding; double-stranded DNA binding; nucleosomal DNA binding	nucleus; nucleolus; nucleosome; chromosome
MEGF10	3.18719e-10	-0.169353	0.163	0.268	1.16654e-05	cell adhesion; muscle organ development; homotypic cell-cell adhesion; phagocytosis; engulfment of apoptotic cell; myoblast migration; apoptotic process involved in development; regulation of muscle cell differentiation; skeletal muscle satellite cell activation; apoptotic cell clearance; skeletal muscle satellite cell differentiation; skeletal muscle satellite cell proliferation; muscle cell pro…	Notch binding; complement component C1q binding; scavenger receptor activity; protein binding	membrane; integral component of membrane; plasma membrane; cell projection; phagocytic cup
FAM111B	3.21768e-10	-0.217859	0.133	0.229	1.1777e-05		protein binding
LMO1	3.28445e-10	0.20904	0.14	0.07	1.20214e-05	positive regulation of transcription by RNA polymerase II; regulation of hematopoietic stem cell differentiation; negative regulation of transcription by RNA polymerase II; regulation of T cell homeostatic proliferation	metal ion binding; protein binding	nucleus; nucleoplasm
PRDX6	3.54485e-10	0.20129	0.851	0.824	1.29745e-05	oxidation-reduction process; lipid metabolic process; lipid catabolic process; cell redox homeostasis; metabolic process; cellular oxidant detoxification; neutrophil degranulation; cellular response to oxidative stress; response to oxidative stress; hydrogen peroxide catabolic process; glycerophospholipid catabolic process; positive regulation of mRNA splicing, via spliceosome	oxidoreductase activity; hydrolase activity; protein binding; catalytic activity; phospholipase A2 activity; phospholipase A2 activity (consuming 1,2-dipalmitoylphosphatidylcholine); phospholipase A2 activity consuming 1,2-dioleoylphosphatidylethanolamine); peroxidase activity; peroxiredoxin activity; antioxidant activity; cadherin binding; ubiquitin protein ligase binding; protein homodimerizati…	cytoplasm; cell; nucleus; membrane; extracellular space; cytosol; perinuclear region of cytoplasm; lysosome; extracellular region; extracellular exosome; azurophil granule lumen
ROBO1	3.78358e-10	0.187041	0.257	0.162	1.38483e-05	positive regulation of gene expression; negative regulation of gene expression; ventricular septum morphogenesis; axon guidance; multicellular organism development; cell differentiation; chemotaxis; axon midline choice point recognition; Roundabout signaling pathway; nervous system development; cell adhesion; aorta development; homophilic cell adhesion via plasma membrane adhesion molecules; acti…	protein binding; axon guidance receptor activity; identical protein binding; LRR domain binding	cytoplasm; membrane; integral component of membrane; plasma membrane; cell projection; cell surface; axon; integral component of plasma membrane; endoplasmic reticulum-Golgi intermediate compartment membrane
BCL2	3.87469e-10	-0.150938	0.113	0.208	1.41817e-05	negative regulation of apoptotic process; regulation of apoptotic process; cellular response to DNA damage stimulus; cell morphogenesis; ossification; ovarian follicle development; metanephros development; ureteric bud development; branching involved in ureteric bud morphogenesis; behavioral fear response; leukocyte homeostasis; B cell homeostasis; kidney development; release of cytochrome c from…	protein homodimerization activity; protein binding; transcription factor binding; protein phosphatase binding; protein heterodimerization activity; protein phosphatase 2A binding; identical protein binding; BH3 domain binding; ubiquitin protein ligase binding; protease binding; sequence-specific DNA binding; channel activity; channel inhibitor activity; repressing transcription factor binding	nucleus; cytoplasm; membrane; integral component of membrane; nucleoplasm; endoplasmic reticulum; endoplasmic reticulum membrane; mitochondrion; nuclear membrane; cytosol; mitochondrial membrane; myelin sheath; mitochondrial outer membrane; protein-containing complex; pore complex
RPL26	3.89367e-10	0.123731	1	0.999	1.42512e-05	translation; cytoplasmic translation; rRNA processing; viral transcription; ribosomal large subunit biogenesis; translational initiation; nuclear-transcribed mRNA catabolic process, nonsense-mediated decay; SRP-dependent cotranslational protein targeting to membrane; cellular response to gamma radiation; DNA damage response, signal transduction by p53 class mediator resulting in cell cycle arrest…	RNA binding; structural constituent of ribosome; protein binding; mRNA 5'-UTR binding	membrane; ribosome; large ribosomal subunit; cytosolic large ribosomal subunit; cytosol; extracellular exosome; cytoplasm; nucleoplasm; nucleolus; cytosolic ribosome; ribonucleoprotein complex; intracellular
RPL5	4.08937e-10	0.129236	1	0.999	1.49675e-05	translation; rRNA processing; ribosomal large subunit assembly; viral transcription; ribosomal large subunit biogenesis; translational initiation; nuclear-transcribed mRNA catabolic process, nonsense-mediated decay; SRP-dependent cotranslational protein targeting to membrane; positive regulation of gene expression; protein stabilization; regulation of signal transduction by p53 class mediator; po…	structural constituent of ribosome; 5S rRNA binding; RNA binding; protein binding; rRNA binding; mRNA 3'-UTR binding; mRNA 5'-UTR binding; ubiquitin protein ligase binding; ubiquitin ligase inhibitor activity	ribosome; intracellular; nucleus; cytoplasm; membrane; endoplasmic reticulum; nucleolus; cytosol; nucleoplasm; focal adhesion; cytosolic large ribosomal subunit; extracellular exosome; protein-containing complex; ribonucleoprotein complex
KMT2E	4.18256e-10	0.209893	0.877	0.824	1.53086e-05	chromatin organization; cell cycle; erythrocyte differentiation; positive regulation of transcription, DNA-templated; histone lysine methylation; cell cycle arrest; positive regulation of G1/S transition of mitotic cell cycle; regulation of megakaryocyte differentiation; DNA methylation; neutrophil activation; neutrophil mediated immunity; positive regulation of histone H3-K4 trimethylation	metal ion binding; protein binding; enzyme binding; methylated histone binding	nucleus; cytoplasm; nuclear speck; membrane; chromosome; plasma membrane; cytoskeleton; nucleoplasm; microtubule organizing center; protein-containing complex; chromatin; transcriptionally active chromatin
TSHZ2	4.25409e-10	-0.140085	0.054	0.13	1.55704e-05	multicellular organism development; regulation of gene expression; regulation of transcription by RNA polymerase II	nucleic acid binding; metal ion binding; DNA binding; DNA-binding transcription factor activity, RNA polymerase II-specific; protein binding; chromatin binding	nucleus; nuclear chromatin
MLLT11	4.72262e-10	-0.175399	0.466	0.585	1.72852e-05	positive regulation of transcription, DNA-templated; apoptotic signaling pathway; positive regulation of apoptotic process; extrinsic apoptotic signaling pathway; positive regulation of release of cytochrome c from mitochondria; intrinsic apoptotic signaling pathway; positive regulation of mitochondrial depolarization	protein binding	nucleus; cytoplasm; cytosol; nucleoplasm; cytoskeleton; microtubule organizing center
MT-ND4L	5.12098e-10	0.215518	0.745	0.67	1.87433e-05	oxidation-reduction process; ATP synthesis coupled electron transport; mitochondrial electron transport, NADH to ubiquinone	oxidoreductase activity; oxidoreductase activity, acting on NAD(P)H; NADH dehydrogenase (ubiquinone) activity	membrane; integral component of membrane; mitochondrion; respirasome; mitochondrial membrane; mitochondrial respiratory chain complex I; NADH dehydrogenase complex
DYNC2H1	5.12833e-10	0.195439	0.307	0.204	1.87702e-05	multicellular organism development; microtubule-based movement; intraciliary transport involved in cilium assembly; cell projection organization; cilium assembly; Golgi organization; intraciliary retrograde transport; determination of left/right symmetry; heart development; dorsal/ventral pattern formation; protein processing; spinal cord motor neuron differentiation; neuron differentiation; embr…	nucleotide binding; ATP binding; motor activity; microtubule motor activity; dynein light intermediate chain binding; dynein intermediate chain binding; ATP-dependent microtubule motor activity, minus-end-directed	cytoplasm; membrane; Golgi apparatus; plasma membrane; cytoskeleton; cell projection; microtubule; dynein complex; cilium; ciliary tip; extracellular exosome; motile cilium; cytoplasmic dynein complex; axoneme; apical part of cell
HMGB1	5.28857e-10	-0.189099	0.981	0.994	1.93567e-05	positive regulation of blood vessel endothelial cell migration; positive regulation of vascular endothelial cell proliferation; cellular response to lipopolysaccharide; DNA repair; DNA recombination; cellular response to DNA damage stimulus; inflammatory response; autophagy; immune system process; innate immune response; chemotaxis; DNA geometric change; adaptive immune response; positive chemota…	RNA binding; DNA binding; lyase activity; protein binding; cytokine activity; transcription coactivator activity; four-way junction DNA binding; bubble DNA binding; DNA binding, bending; supercoiled DNA binding; transcription factor binding; double-stranded DNA binding; lipopolysaccharide binding; transcription regulatory region DNA binding; repressing transcription factor binding; phosphatidylse…	nucleus; cytoplasm; membrane; chromosome; extracellular space; plasma membrane; extracellular region; cell surface; endosome; nuclear chromatin; nucleoplasm; secretory granule lumen; ficolin-1-rich granule lumen; endoplasmic reticulum-Golgi intermediate compartment; transcriptional repressor complex; condensed chromosome; alphav-beta3 integrin-HMGB1 complex
RPS9	5.50925e-10	0.111696	1	0.999	2.01644e-05	translation; viral transcription; positive regulation of cell population proliferation; translational initiation; rRNA processing; nuclear-transcribed mRNA catabolic process, nonsense-mediated decay; SRP-dependent cotranslational protein targeting to membrane; positive regulation of translational fidelity	RNA binding; structural constituent of ribosome; protein binding; rRNA binding; translation regulator activity	nucleus; cytoplasm; membrane; ribosome; small ribosomal subunit; cytosolic small ribosomal subunit; nucleolus; focal adhesion; nucleoplasm; cytosol; extracellular exosome; ribonucleoprotein complex; intracellular; synapse
FAM172A	5.78871e-10	-0.180979	0.246	0.36	2.11873e-05	mRNA processing; RNA splicing; regulation of alternative mRNA splicing, via spliceosome; neural crest cell development; chromatin silencing by small RNA	siRNA binding	nucleus; cytoplasm; endoplasmic reticulum
SNRPA	6.04352e-10	-0.205704	0.391	0.502	2.21199e-05	mRNA processing; RNA splicing; mRNA splicing, via spliceosome; regulation of mRNA polyadenylation	nucleic acid binding; RNA binding; protein binding; identical protein binding; U1 snRNA binding; U1 snRNP binding	nucleoplasm; nucleus; spliceosomal complex; U1 snRNP
DUSP15	6.12169e-10	0.11755	0.153	0.078	2.2406e-05	protein dephosphorylation; dephosphorylation; peptidyl-tyrosine dephosphorylation; positive regulation of JNK cascade; transforming growth factor beta receptor signaling pathway; regulation of cell population proliferation	protein binding; hydrolase activity; phosphoprotein phosphatase activity; protein tyrosine phosphatase activity; phosphatase activity; protein tyrosine/serine/threonine phosphatase activity	cytosol; plasma membrane; cytoplasm; membrane
PTMA	6.90585e-10	-0.177893	0.992	0.999	2.52761e-05	negative regulation of apoptotic process; transcription, DNA-templated; histone exchange	protein binding; activating transcription factor binding; histone binding	cytosol; nucleoplasm; nucleus
MLF1	6.97386e-10	0.200106	0.481	0.372	2.5525e-05	cell cycle; multicellular organism development; cell differentiation; transcription, DNA-templated; regulation of transcription, DNA-templated; cell cycle arrest; myeloid progenitor cell differentiation	DNA binding; protein binding; protein domain specific binding	nucleus; cytoplasm; cytoskeleton; cell projection; cilium; ciliary basal body
LY6H	7.24304e-10	-0.169774	0.152	0.254	2.65102e-05	acetylcholine receptor signaling pathway; negative regulation of signaling receptor activity; nervous system development; animal organ morphogenesis	protein binding; acetylcholine receptor binding; acetylcholine receptor inhibitor activity	membrane; plasma membrane; extracellular region; anchored component of membrane
PGM2	7.33905e-10	-0.176556	0.172	0.27	2.68617e-05	carbohydrate metabolic process; organic substance metabolic process; glucose metabolic process; neutrophil degranulation; glycogen biosynthetic process; pentose-phosphate shunt; glycogen catabolic process; galactose catabolic process; deoxyribose phosphate catabolic process	metal ion binding; isomerase activity; magnesium ion binding; protein binding; intramolecular transferase activity, phosphotransferases; phosphoglucomutase activity; phosphopentomutase activity	cytoplasm; extracellular region; cytosol; extracellular exosome; secretory granule lumen; ficolin-1-rich granule lumen
TIMP1	7.94087e-10	-0.194959	0.224	0.34	2.90644e-05	negative regulation of trophoblast cell migration; negative regulation of endopeptidase activity; negative regulation of peptidase activity; cellular protein metabolic process; post-translational protein modification; positive regulation of cell population proliferation; platelet degranulation; cytokine-mediated signaling pathway; extracellular matrix disassembly; regulation of integrin-mediated …	metal ion binding; zinc ion binding; growth factor activity; protein binding; cytokine activity; metalloendopeptidase inhibitor activity; peptidase inhibitor activity; protease binding; enzyme inhibitor activity	extracellular space; extracellular region; collagen trimer; extracellular matrix; extracellular exosome; endoplasmic reticulum lumen; platelet alpha granule lumen; basement membrane
LRIG1	8.69297e-10	-0.158087	0.208	0.319	3.18172e-05	sensory perception of sound; hair cycle process; otolith morphogenesis; innervation	protein binding	membrane; integral component of membrane; plasma membrane; extracellular space; extracellular matrix
C11orf96	9.21681e-10	0.191057	0.132	0.065	3.37344e-05
KIAA1217	9.41942e-10	-0.114323	0.04	0.108	3.4476e-05	multicellular organism development; embryonic skeletal system development		cytoplasm
SUPT16H	9.98506e-10	-0.195945	0.75	0.818	3.65463e-05	DNA repair; cellular response to DNA damage stimulus; DNA replication; transcription by RNA polymerase II; transcription elongation from RNA polymerase II promoter; regulation of signal transduction by p53 class mediator; positive regulation of DNA-templated transcription, elongation; positive regulation of transcription elongation from RNA polymerase II promoter; nucleosome disassembly; DNA repl…	RNA binding; protein binding; histone binding; nucleosome binding	nucleus; chromosome; nucleoplasm; FACT complex
SEPTIN7	1.02485e-09	0.326977	0.973	0.977	3.75104e-05	negative regulation of cell migration; negative regulation of G1/S transition of mitotic cell cycle; positive regulation of apoptotic process; cell division; cell cycle; cell differentiation; spermatogenesis; cilium assembly; protein heterooligomerization; cytoskeleton-dependent cytokinesis; regulation of embryonic cell shape; positive regulation of non-motile cilium assembly	nucleotide binding; GTP binding; protein binding; identical protein binding; cadherin binding; GTPase activity; structural molecule activity	nucleus; cytoplasm; motile cilium; chromosome; cytoskeleton; cell projection; septin complex; spindle; midbody; chromosome, centromeric region; kinetochore; condensed chromosome kinetochore; cilium; cytosol; extracellular exosome; stress fiber; axoneme; non-motile cilium; cleavage furrow; microtubule cytoskeleton; apical plasma membrane; septin ring; sperm annulus
SRSF10	1.04126e-09	-0.219688	0.737	0.812	3.81112e-05	mRNA processing; RNA splicing; mRNA splicing, via spliceosome; regulation of RNA splicing; regulation of alternative mRNA splicing, via spliceosome; regulation of transcription, DNA-templated; negative regulation of mRNA splicing, via spliceosome; RNA splicing, via transesterification reactions; mRNA cis splicing, via spliceosome; spliceosomal tri-snRNP complex assembly; mRNA splice site selectio…	nucleic acid binding; RNA binding; protein binding; unfolded protein binding; RS domain binding	nucleus; cytoplasm; nuclear speck; cytosol; nucleoplasm
RPLP1	1.05216e-09	-0.110721	1	1	3.85103e-05	translation; cytoplasmic translation; translational elongation; regulation of translation; activation of protein kinase activity; viral transcription; translational initiation; nuclear-transcribed mRNA catabolic process, nonsense-mediated decay; SRP-dependent cotranslational protein targeting to membrane	structural constituent of ribosome; protein binding; ribonucleoprotein complex binding; protein kinase activator activity	ribosome; focal adhesion; cytosolic large ribosomal subunit; cytosol; intracellular
CTSC	1.05617e-09	0.201738	0.292	0.197	3.86569e-05	proteolysis; apoptotic process; neutrophil degranulation; immune response; endoplasmic reticulum to Golgi vesicle-mediated transport; COPII vesicle coating; proteolysis involved in cellular protein catabolic process; positive regulation of proteolysis involved in cellular protein catabolic process; T cell mediated cytotoxicity; aging; response to organic substance; negative regulation of myelinat…	hydrolase activity; protein binding; peptidase activity; cysteine-type peptidase activity; cysteine-type endopeptidase activity; chaperone binding; serine-type endopeptidase activity; peptidase activator activity involved in apoptotic process; phosphatase binding; chloride ion binding; identical protein binding; protein self-association	membrane; intracellular membrane-bounded organelle; centrosome; nucleoplasm; extracellular space; lysosome; extracellular region; Golgi membrane; extracellular exosome; collagen-containing extracellular matrix; endoplasmic reticulum lumen; azurophil granule lumen; endoplasmic reticulum-Golgi intermediate compartment membrane; COPII-coated ER to Golgi transport vesicle; cytoplasm; endoplasmic reti…
HSP90B1	1.12945e-09	0.266563	0.881	0.831	4.1339e-05	protein folding; protein transport; negative regulation of apoptotic process; receptor-mediated endocytosis; retrograde protein transport, ER to cytosol; cellular protein metabolic process; post-translational protein modification; response to hypoxia; ubiquitin-dependent ERAD pathway; toll-like receptor signaling pathway; cytokine-mediated signaling pathway; response to endoplasmic reticulum stre…	ATP binding; unfolded protein binding; RNA binding; nucleotide binding; protein binding; calcium ion binding; low-density lipoprotein particle receptor binding; protein phosphatase binding	nucleus; membrane; endoplasmic reticulum; endoplasmic reticulum membrane; cytosol; melanosome; perinuclear region of cytoplasm; focal adhesion; midbody; extracellular region; endoplasmic reticulum lumen; extracellular exosome; collagen-containing extracellular matrix; sarcoplasmic reticulum; protein-containing complex; sarcoplasmic reticulum lumen; endocytic vesicle lumen; plasma membrane; endopl…
DCAKD	1.19671e-09	-0.158846	0.148	0.243	4.38008e-05	phosphorylation; coenzyme A biosynthetic process	nucleotide binding; ATP binding; dephospho-CoA kinase activity	membrane
EEF1G	1.23813e-09	0.130302	1	0.999	4.53168e-05	translation; translational elongation; response to virus	protein binding; translation elongation factor activity; cadherin binding	cytoplasm; nucleus; membrane; endoplasmic reticulum; cytosol; extracellular exosome
TPI1	1.32772e-09	-0.188612	0.963	0.98	4.85959e-05	glycolytic process; gluconeogenesis; canonical glycolysis; glyceraldehyde-3-phosphate biosynthetic process; glucose metabolic process; multicellular organism development; methylglyoxal biosynthetic process; glycerol catabolic process; glyceraldehyde-3-phosphate metabolic process	isomerase activity; catalytic activity; lyase activity; protein homodimerization activity; protein binding; ubiquitin protein ligase binding; triose-phosphate isomerase activity; methylglyoxal synthase activity	nucleus; cytoplasm; extracellular space; cytosol; extracellular exosome
PPP3CA	1.36125e-09	-0.166845	0.184	0.288	4.98232e-05	positive regulation of transcription by RNA polymerase II; positive regulation of cell migration; Fc-epsilon receptor signaling pathway; dephosphorylation; protein dephosphorylation; T cell activation; cellular response to drug; skeletal muscle tissue regeneration; Wnt signaling pathway, calcium modulating pathway; response to calcium ion; calcineurin-NFAT signaling cascade; calcineurin-mediated …	metal ion binding; hydrolase activity; phosphoprotein phosphatase activity; protein binding; calcium ion binding; calmodulin binding; enzyme binding; drug binding; protein serine/threonine phosphatase activity; cyclosporin A binding; protein dimerization activity; calmodulin-dependent protein phosphatase activity; calcium-dependent protein serine/threonine phosphatase activity; protein heterodime…	cytoplasm; membrane; cytosol; nucleoplasm; plasma membrane; cell projection; sarcolemma; dendritic spine; Z disc; cytoplasmic side of plasma membrane; calcineurin complex; postsynapse; nucleus; mitochondrion; slit diaphragm; synapse; Schaffer collateral - CA1 synapse; glutamatergic synapse
CASP8AP2	1.4933e-09	-0.206602	0.384	0.488	5.46564e-05	apoptotic signaling pathway; activation of cysteine-type endopeptidase activity involved in apoptotic process; extrinsic apoptotic signaling pathway via death domain receptors	protease binding; cysteine-type endopeptidase activator activity involved in apoptotic process; identical protein binding	nucleus; cytoplasm
NME1	1.50686e-09	-0.220247	0.665	0.752	5.51527e-05	phosphorylation; DNA metabolic process; cell differentiation; nucleoside diphosphate phosphorylation; GTP biosynthetic process; UTP biosynthetic process; CTP biosynthetic process; nucleotide metabolic process; nervous system development; endocytosis; negative regulation of cell population proliferation; regulation of apoptotic process; purine nucleotide metabolic process; pyrimidine nucleotide me…	RNA binding; metal ion binding; nucleotide binding; ATP binding; kinase activity; transferase activity; GTP binding; protein binding; magnesium ion binding; nucleoside diphosphate kinase activity; identical protein binding; ribosomal small subunit binding; deoxyribonuclease activity; RNA polymerase II regulatory region sequence-specific DNA binding; single-stranded DNA binding; intermediate filam…	nucleus; cytoplasm; membrane; cytosol; extracellular exosome; ruffle membrane; mitochondrial outer membrane; centrosome; intermediate filament; perinuclear region of cytoplasm
EGLN3	1.52193e-09	-0.164417	0.135	0.23	5.57043e-05	oxidation-reduction process; cellular response to DNA damage stimulus; apoptotic process; regulation of transcription from RNA polymerase II promoter in response to hypoxia; response to hypoxia; regulation of cell population proliferation; activation of cysteine-type endopeptidase activity involved in apoptotic process; regulation of neuron apoptotic process; protein hydroxylation; peptidyl-proli…	metal ion binding; oxidoreductase activity; iron ion binding; oxidoreductase activity, acting on paired donors, with incorporation or reduction of molecular oxygen; L-ascorbic acid binding; protein binding; dioxygenase activity; 2-oxoglutarate-dependent dioxygenase activity; peptidyl-proline 4-dioxygenase activity	nucleus; cytoplasm; cytosol; nucleoplasm
NPDC1	1.58814e-09	-0.184212	0.325	0.436	5.81275e-05	regulation of immune response	protein binding	membrane; integral component of membrane; plasma membrane
OAF	1.79159e-09	-0.147494	0.125	0.216	6.55739e-05
HNRNPD	1.9317e-09	-0.187758	0.905	0.934	7.07022e-05	rhythmic process; positive regulation of transcription, DNA-templated; positive regulation of translation; liver development; brain development; positive regulation of gene expression; negative regulation of gene expression; cerebellum development; regulation of telomere maintenance; response to estradiol; regulation of mRNA stability; mRNA stabilization; response to calcium ion; response to elec…	nucleic acid binding; RNA binding; DNA binding; protein binding; AT DNA binding; chromatin binding; mRNA binding; transcription factor binding; mRNA 3'-UTR AU-rich region binding; histone deacetylase binding; sequence-specific DNA binding; sequence-specific double-stranded DNA binding; telomeric DNA binding	nucleus; cytoplasm; nucleoplasm; cytosol; synapse; ribonucleoprotein complex
TLN2	1.94151e-09	-0.161746	0.107	0.194	7.10612e-05	cell adhesion; cytoskeletal anchoring at plasma membrane; cell-cell junction assembly; endocytosis	actin binding; actin filament binding; protein binding; structural constituent of cytoskeleton; structural molecule activity; clathrin binding	cytoplasm; membrane; plasma membrane; cytoskeleton; cell junction; synapse; focal adhesion; actin cytoskeleton; ruffle
RPS17	1.97837e-09	0.146296	0.999	0.997	7.24103e-05	translation; translational initiation; rRNA processing; ribosomal small subunit biogenesis; viral transcription; nuclear-transcribed mRNA catabolic process, nonsense-mediated decay; SRP-dependent cotranslational protein targeting to membrane; erythrocyte homeostasis	RNA binding; structural constituent of ribosome	membrane; ribosome; cytosolic small ribosomal subunit; focal adhesion; nucleoplasm; cytosol; synapse; intracellular
ANAPC11	2.00315e-09	-0.174493	0.792	0.847	7.33174e-05	protein ubiquitination; cell division; cell cycle; ubiquitin-dependent protein catabolic process; anaphase-promoting complex-dependent catabolic process; regulation of mitotic cell cycle phase transition; protein K11-linked ubiquitination; mitotic cell cycle; positive regulation of mitotic metaphase/anaphase transition	metal ion binding; ubiquitin-protein transferase activity; ubiquitin protein ligase activity; cullin family protein binding; ubiquitin-ubiquitin ligase activity	nucleus; cytoplasm; nucleolus; nucleoplasm; anaphase-promoting complex; cytosol; cullin-RING ubiquitin ligase complex
SH3RF1	2.00402e-09	-0.147284	0.22	0.333	7.33491e-05	negative regulation of apoptotic process; protein ubiquitination; apoptotic process; protein autoubiquitination; regulation of JNK cascade; negative regulation of cysteine-type endopeptidase activity involved in apoptotic process; positive regulation of JNK cascade; negative regulation of extrinsic apoptotic signaling pathway; neuron migration; regulation of CD8-positive, alpha-beta T cell prolif…	metal ion binding; transferase activity; protein binding; ubiquitin protein ligase activity; MAP-kinase scaffold activity	cytoplasm; Golgi apparatus; cytosol; cell projection; perinuclear region of cytoplasm; lamellipodium
CTBP2	2.12803e-09	-0.230755	0.588	0.688	7.78881e-05	oxidation-reduction process; cell differentiation; viral process; negative regulation of transcription, DNA-templated; positive regulation of transcription by RNA polymerase II; viral genome replication; negative regulation of cell population proliferation; white fat cell differentiation; maintenance of presynaptic active zone structure; positive regulation of retinoic acid receptor signaling pat…	oxidoreductase activity; oxidoreductase activity, acting on the CH-OH group of donors, NAD or NADP as acceptor; protein binding; NAD binding; protein kinase binding; protein-containing complex binding; chromatin binding; transcription coactivator activity; transcription corepressor activity; retinoic acid receptor binding; structural constituent of presynaptic active zone	nucleus; cell junction; synapse; transcriptional repressor complex; ribbon synapse; photoreceptor ribbon synapse; presynaptic active zone cytoplasmic component; glutamatergic synapse; GABA-ergic synapse; presynaptic cytosol
RAB31	2.15129e-09	0.2172	0.294	0.199	7.87395e-05	intracellular protein transport; Rab protein signal transduction; neutrophil degranulation; Golgi to plasma membrane protein transport; cellular response to insulin stimulus; regulated exocytosis; receptor internalization; phagosome maturation; positive regulation of phagocytosis, engulfment	nucleotide binding; GTPase activity; GTP binding; protein binding; GDP binding	membrane; Golgi apparatus; cytoplasmic vesicle; plasma membrane; endosome; early endosome; cytosol; phagocytic cup; phagocytic vesicle membrane; secretory granule membrane; trans-Golgi network membrane; phagocytic vesicle; early endosome membrane; early phagosome membrane
AAMDC	2.2206e-09	-0.219007	0.387	0.49	8.12761e-05	positive regulation of fat cell differentiation	protein binding	cytoplasm
CHST2	2.3975e-09	-0.127828	0.075	0.154	8.77508e-05	carbohydrate metabolic process; inflammatory response; multicellular organism development; keratan sulfate biosynthetic process; N-acetylglucosamine metabolic process; sulfur compound metabolic process	transferase activity; sulfotransferase activity; N-acetylglucosamine 6-O-sulfotransferase activity	membrane; integral component of membrane; Golgi apparatus; Golgi membrane; trans-Golgi network; intrinsic component of Golgi membrane
SAMD1	2.51905e-09	-0.197856	0.386	0.493	9.21999e-05		protein binding
DPCD	2.55309e-09	0.195106	0.448	0.344	9.34455e-05	epithelial cilium movement involved in extracellular fluid movement; spermatogenesis; determination of left/right symmetry; ventricular system development; lateral ventricle development; third ventricle development; flagellated sperm motility; left/right pattern formation	protein binding	nucleus; extracellular region
JUN	2.56191e-09	-0.323946	0.746	0.805	9.37686e-05	positive regulation of vascular smooth muscle cell proliferation; transforming growth factor beta receptor signaling pathway; positive regulation of transcription by RNA polymerase II; positive regulation of transcription, DNA-templated; regulation of transcription, DNA-templated; positive regulation of GTPase activity; Fc-epsilon receptor signaling pathway; negative regulation of transcription b…	transcription regulatory region DNA binding; RNA binding; DNA binding; DNA-binding transcription factor activity; protein binding; GTPase activator activity; transcription coactivator activity; identical protein binding; DNA-binding transcription factor activity, RNA polymerase II-specific; RNA polymerase II proximal promoter sequence-specific DNA binding; transcription factor binding; DNA-bindin…	nucleus; nucleoplasm; nuclear chromatin; transcription factor complex; transcription factor AP-1 complex; nuclear chromosome; nuclear euchromatin; cytosol; transcriptional repressor complex
CTNNBIP1	2.66174e-09	0.182692	0.245	0.158	9.74223e-05	negative regulation of DNA-binding transcription factor activity; positive regulation of osteoblast differentiation; Wnt signaling pathway; negative regulation of transcription by RNA polymerase II; branching involved in ureteric bud morphogenesis; anterior/posterior pattern specification; negative regulation of Wnt signaling pathway; negative regulation of protein complex assembly; negative regu…	beta-catenin binding; protein binding; armadillo repeat domain binding	cytoplasm; nucleus; cytosol; nucleoplasm; beta-catenin destruction complex
WSB1	2.90976e-09	0.267713	0.92	0.911	0.0001065	protein ubiquitination; intracellular signal transduction; protein polyubiquitination; post-translational protein modification	protein binding	cytosol; intracellular
CDK6	3.05677e-09	0.307051	0.379	0.284	0.000111881	negative regulation of epithelial cell proliferation; positive regulation of fibroblast proliferation; negative regulation of osteoblast differentiation; protein phosphorylation; phosphorylation; cell division; cell cycle; cell differentiation; regulation of cell population proliferation; negative regulation of cell population proliferation; response to virus; cell cycle arrest; negative regulati…	nucleotide binding; protein kinase activity; protein serine/threonine kinase activity; ATP binding; kinase activity; transferase activity; protein binding; cyclin-dependent protein serine/threonine kinase activity; cyclin binding; FBXO family protein binding	cytoplasm; nucleus; cytosol; nucleoplasm; cytoskeleton; cell projection; centrosome; microtubule organizing center; ruffle; cyclin-dependent protein kinase holoenzyme complex; cyclin D2-CDK6 complex
CDK4	3.11127e-09	-0.198118	0.602	0.704	0.000113875	positive regulation of cell population proliferation; positive regulation of fibroblast proliferation; protein phosphorylation; phosphorylation; cell division; cell cycle; regulation of cyclin-dependent protein serine/threonine kinase activity; lens development in camera-type eye; signal transduction; circadian rhythm; response to toxic substance; response to organic substance; response to lead i…	nucleotide binding; protein kinase activity; protein serine/threonine kinase activity; ATP binding; kinase activity; transferase activity; protein binding; cyclin-dependent protein serine/threonine kinase activity; cyclin binding; protein-containing complex binding; cyclin-dependent protein serine/threonine kinase regulator activity	nucleus; cytoplasm; membrane; nucleolus; cytosol; nuclear membrane; cyclin-dependent protein kinase holoenzyme complex; transcription factor complex; bicellular tight junction; protein-containing complex; perinuclear region of cytoplasm; cyclin D2-CDK4 complex; nucleoplasm; chromatin
NRXN1	3.16336e-09	0.249823	0.271	0.183	0.000115782	cell adhesion; positive regulation of synapse assembly; neurotransmitter secretion; axon guidance; chemical synaptic transmission; learning; synapse assembly; positive regulation of synaptic transmission, glutamatergic; social behavior; neuromuscular process controlling balance; neuron cell-cell adhesion; adult behavior; vocalization behavior; postsynaptic membrane assembly; gephyrin clustering i…	metal ion binding; protein binding; signaling receptor activity; calcium ion binding; cell adhesion molecule binding; calcium channel regulator activity; neuroligin family protein binding; acetylcholine receptor binding; signaling receptor binding; transmembrane signaling receptor activity; calcium-dependent protein binding; type 1 fibroblast growth factor receptor binding	membrane; integral component of membrane; nucleolus; plasma membrane; cell junction; synapse; cell surface; integral component of plasma membrane; endoplasmic reticulum; presynaptic membrane; vesicle; nuclear membrane; neuronal cell body; protein-containing complex; Schaffer collateral - CA1 synapse; glutamatergic synapse; GABA-ergic synapse; integral component of presynaptic membrane; integral c…
CDC42EP4	3.24503e-09	-0.150268	0.231	0.34	0.000118771	positive regulation of pseudopodium assembly; Rho protein signal transduction; regulation of cell shape; positive regulation of actin filament polymerization; cellular response to interferon-gamma	RNA binding; protein binding; GTP-Rho binding	cytoplasm; membrane; plasma membrane; actin cytoskeleton; microtubule cytoskeleton; cytoskeleton; endomembrane system; phagocytic vesicle; cell-cell adherens junction
NTM	3.2922e-09	0.191981	0.21	0.128	0.000120498	cell adhesion; neuron recognition	protein binding	membrane; plasma membrane; extracellular region; anchored component of membrane
RPL35A	3.32053e-09	0.112606	1	0.999	0.000121535	translation; cytoplasmic translation; rRNA processing; viral transcription; ribosomal large subunit biogenesis; translational initiation; nuclear-transcribed mRNA catabolic process, nonsense-mediated decay; SRP-dependent cotranslational protein targeting to membrane	RNA binding; structural constituent of ribosome; tRNA binding; protein binding	membrane; ribosome; cytosolic large ribosomal subunit; cytosol; extracellular exosome; intracellular
IFI44	3.38662e-09	-0.143919	0.111	0.201	0.000123954	immune response; response to virus; response to bacterium		cytoplasm
CADM2	3.53135e-09	0.139275	0.147	0.077	0.000129251	cell adhesion; adherens junction organization		membrane; integral component of membrane; plasma membrane; cell projection; cell junction; synapse; axon
RAD50	3.92297e-09	-0.172753	0.273	0.385	0.000143584	DNA repair; telomere maintenance; nucleic acid phosphodiester bond hydrolysis; DNA recombination; cellular response to DNA damage stimulus; cell cycle; double-strand break repair; meiotic cell cycle; nucleoside monophosphate phosphorylation; viral process; DNA duplex unwinding; regulation of signal transduction by p53 class mediator; DNA replication; telomere maintenance via telomerase; reciproca…	ATPase activity; metal ion binding; nucleotide binding; ATP binding; hydrolase activity; protein binding; identical protein binding; protein binding, bridging; DNA binding; 3'-5' exonuclease activity; DNA helicase activity; single-stranded DNA endodeoxyribonuclease activity; single-stranded telomeric DNA binding; double-stranded telomeric DNA binding; adenylate kinase activity; G-quadruplex DNA b…	nucleus; Mre11 complex; membrane; nucleoplasm; chromosome; chromosome, telomeric region; nuclear chromatin; nuclear chromosome, telomeric region; site of double-strand break; condensed nuclear chromosome
RPL7A	4.16623e-09	0.112038	0.998	0.999	0.000152488	translation; ribosome biogenesis; viral transcription; translational initiation; nuclear-transcribed mRNA catabolic process, nonsense-mediated decay; maturation of LSU-rRNA; SRP-dependent cotranslational protein targeting to membrane	RNA binding; protein binding; structural constituent of ribosome; cadherin binding	nucleus; cytoplasm; ribosome; nucleolus; focal adhesion; ribonucleoprotein complex; cytosolic large ribosomal subunit; cytosol; membrane; polysomal ribosome
STAT3	4.27663e-09	0.193207	0.342	0.247	0.000156529	miRNA mediated inhibition of translation; positive regulation of gene expression; positive regulation of transcription by RNA polymerase II; positive regulation of metalloendopeptidase activity; positive regulation of transcription, DNA-templated; positive regulation of cell migration; phosphorylation; regulation of transcription, DNA-templated; signal transduction; inflammatory response; defense…	transcription regulatory region DNA binding; DNA binding; DNA-binding transcription factor activity; chromatin DNA binding; protein homodimerization activity; protein binding; identical protein binding; DNA-binding transcription activator activity, RNA polymerase II-specific; RNA polymerase II proximal promoter sequence-specific DNA binding; DNA-binding transcription factor activity, RNA polymera…	cytoplasm; nucleus; cytosol; nucleoplasm; plasma membrane; nuclear chromatin; RNA polymerase II transcription factor complex; transcription factor complex; mitochondrion; mitochondrial inner membrane; postsynaptic density; nuclear transcription factor complex; Schaffer collateral - CA1 synapse; glutamatergic synapse
AK4	4.34459e-09	0.169862	0.264	0.173	0.000159016	phosphorylation; nucleobase-containing compound metabolic process; nucleoside monophosphate phosphorylation; ADP biosynthetic process; AMP metabolic process; ATP metabolic process; GTP metabolic process; nucleobase-containing small molecule interconversion; cellular response to hypoxia; nucleoside diphosphate phosphorylation; nucleoside triphosphate biosynthetic process; regulation of oxidative p…	ATP binding; kinase activity; transferase activity; nucleobase-containing compound kinase activity; adenylate kinase activity; nucleotide binding; GTP binding; nucleoside diphosphate kinase activity; protein binding; phosphotransferase activity, phosphate group as acceptor; nucleoside triphosphate adenylate kinase activity; nucleoside monophosphate kinase activity	mitochondrion; mitochondrial matrix
NT5DC2	4.35341e-09	-0.193617	0.463	0.569	0.000159339	dephosphorylation	metal ion binding; hydrolase activity; 5'-nucleotidase activity
TPD52	4.39753e-09	-0.122842	0.064	0.136	0.000160954	anatomical structure morphogenesis; B cell differentiation; secretion	protein homodimerization activity; protein binding; calcium ion binding; protein heterodimerization activity	cytoplasm; endoplasmic reticulum; perinuclear region of cytoplasm
INHBB	4.57829e-09	-0.126985	0.08	0.158	0.00016757	cell differentiation; defense response; fat cell differentiation; regulation of apoptotic process; cellular response to starvation; SMAD protein signal transduction; positive regulation of pathway-restricted SMAD protein phosphorylation; regulation of MAPK cascade; cell development; cellular response to insulin stimulus; response to wounding; ovarian follicle development; positive regulation of f…	growth factor activity; protein homodimerization activity; cytokine activity; hormone activity; protein binding; transforming growth factor beta receptor binding; host cell surface receptor binding	extracellular region; perinuclear region of cytoplasm; extracellular space; cell periphery
SNHG32	4.78138e-09	0.214685	0.817	0.761	0.000175003
SYF2	4.86497e-09	0.187974	0.686	0.597	0.000178063	mRNA processing; RNA splicing; mRNA splicing, via spliceosome; in utero embryonic development; mitotic G2 DNA damage checkpoint; gastrulation; positive regulation of cell population proliferation; embryonic organ development	RNA binding; protein binding	nucleus; nuclear speck; spliceosomal complex; catalytic step 2 spliceosome; nucleoplasm; Prp19 complex; U2-type catalytic step 2 spliceosome; post-mRNA release spliceosomal complex
APLP2	4.90405e-09	0.196582	0.74	0.69	0.000179493	negative regulation of endopeptidase activity; G protein-coupled receptor signaling pathway; negative regulation of peptidase activity; cellular protein metabolic process; post-translational protein modification; platelet degranulation	metal ion binding; DNA binding; serine-type endopeptidase inhibitor activity; protein binding; heparin binding; identical protein binding; transition metal ion binding; peptidase inhibitor activity	nucleus; membrane; integral component of membrane; plasma membrane; extracellular exosome; endoplasmic reticulum lumen; platelet alpha granule membrane
NME3	4.9714e-09	-0.174107	0.458	0.561	0.000181958	phosphorylation; apoptotic process; nucleoside diphosphate phosphorylation; GTP biosynthetic process; UTP biosynthetic process; CTP biosynthetic process; nucleotide metabolic process; purine nucleotide metabolic process; pyrimidine nucleotide metabolic process; nucleobase-containing small molecule interconversion	metal ion binding; nucleotide binding; ATP binding; kinase activity; transferase activity; protein binding; nucleoside diphosphate kinase activity	cytosol
CPNE3	5.12777e-09	-0.184363	0.742	0.818	0.000187681	protein phosphorylation; positive regulation of cell migration; neutrophil degranulation; cellular response to calcium ion; cellular response to growth factor stimulus; ERBB2 signaling pathway; glycerophospholipid biosynthetic process	RNA binding; protein serine/threonine kinase activity; protein binding; calcium-dependent phospholipid binding; calcium-dependent protein binding; receptor tyrosine kinase binding	nucleus; cytoplasm; membrane; nucleolus; cytosol; mitochondrion; plasma membrane; cell junction; focal adhesion; extracellular exosome; azurophil granule membrane
FAM122B	5.17467e-09	0.115538	0.104	0.047	0.000189398			collagen trimer
LIX1	5.24301e-09	0.262225	0.553	0.46	0.0001919	autophagosome maturation; autophagy		cytoplasm
CDT1	5.33478e-09	-0.16602	0.195	0.294	0.000195258	cell division; cell cycle; DNA replication; chromosome segregation; mitotic cell cycle; G1/S transition of mitotic cell cycle; attachment of mitotic spindle microtubules to kinetochore; kinetochore organization; positive regulation of protein localization to kinetochore; positive regulation of DNA replication; regulation of DNA-dependent DNA replication initiation; regulation of transcription inv…	DNA binding; protein binding; DNA polymerase binding; chromatin binding	nucleus; chromosome; nuclear body; chromosome, centromeric region; kinetochore; condensed chromosome kinetochore; nucleoplasm; cytosol
POP7	5.79012e-09	-0.165929	0.29	0.396	0.000211924	tRNA processing; RNA phosphodiester bond hydrolysis; RNA phosphodiester bond hydrolysis, endonucleolytic; rRNA processing; tRNA 5'-leader removal	nucleic acid binding; RNA binding; hydrolase activity; protein binding; ribonuclease P activity; ribonuclease P RNA binding	nucleus; cytoplasm; nucleolus; nucleoplasm; ribonuclease MRP complex; multimeric ribonuclease P complex
REV3L	5.86926e-09	-0.224451	0.443	0.548	0.000214821	DNA repair; translesion synthesis; nucleic acid phosphodiester bond hydrolysis; cellular response to DNA damage stimulus; DNA replication; double-strand break repair via homologous recombination; DNA-dependent DNA replication; error-prone translesion synthesis	nucleic acid binding; metal ion binding; transferase activity; DNA binding; protein binding; nucleotide binding; nucleotidyltransferase activity; DNA-directed DNA polymerase activity; iron-sulfur cluster binding; 4 iron, 4 sulfur cluster binding	zeta DNA polymerase complex; nucleus; nucleoplasm; nucleolus
HNRNPU	6.2886e-09	-0.176115	0.872	0.915	0.000230169	mRNA processing; RNA splicing; cell division; chromatin organization; cell cycle; rhythmic process; multicellular organism development; circadian regulation of gene expression; cell differentiation; mRNA splicing, via spliceosome; regulation of alternative mRNA splicing, via spliceosome; negative regulation of transcription by RNA polymerase II; positive regulation of transcription by RNA polymer…	RNA binding; nucleotide binding; ATP binding; actin binding; DNA binding; chromatin DNA binding; protein binding; RNA polymerase II proximal promoter sequence-specific DNA binding; transcription corepressor activity; chromatin binding; identical protein binding; double-stranded DNA binding; ribonucleoprotein complex binding; mRNA 3'-UTR binding; poly(A) binding; protein-containing complex binding…	nucleus; cytoplasm; nuclear speck; membrane; nucleoplasm; dendrite cytoplasm; chromosome; cytoskeleton; spliceosomal complex; cell surface; catalytic step 2 spliceosome; spindle pole; centrosome; microtubule organizing center; spindle; midbody; chromosome, centromeric region; kinetochore; condensed chromosome kinetochore; RNA polymerase II transcription factor complex; protein-containing complex;…
SORBS1	6.60021e-09	-0.109742	0.099	0.186	0.000241574	positive regulation of glucose import; positive regulation of protein localization to plasma membrane; cellular response to insulin stimulus; focal adhesion assembly; insulin receptor signaling pathway; muscle contraction; positive regulation of insulin receptor signaling pathway; cell-matrix adhesion; positive regulation of glycogen biosynthetic process; positive regulation of lipid biosynthetic…	protein binding; actin binding; insulin receptor binding; SH3/SH2 adaptor activity; cytoskeletal protein binding	centrosome; plasma membrane; focal adhesion; nucleus; cytoplasm; membrane; cytoskeleton; cell junction; membrane raft; cytosol; stress fiber; adherens junction; nuclear matrix; cell-cell adherens junction; insulin receptor complex; zonula adherens; cell-substrate adherens junction
MSH6	6.78556e-09	-0.208051	0.554	0.661	0.000248358	DNA repair; cellular response to DNA damage stimulus; mismatch repair; viral process; negative regulation of DNA recombination; intrinsic apoptotic signaling pathway in response to DNA damage; determination of adult lifespan; meiotic mismatch repair; somatic recombination of immunoglobulin gene segments; maintenance of DNA repeat elements; positive regulation of helicase activity; response to UV;…	nucleotide binding; ATP binding; DNA binding; mismatched DNA binding; protein binding; enzyme binding; methylated histone binding; four-way junction DNA binding; DNA-dependent ATPase activity; MutLalpha complex binding; ATPase activity; single guanine insertion binding; oxidized purine DNA binding; magnesium ion binding; double-stranded DNA binding; guanine/thymine mispair binding; single thymine…	nucleus; Golgi apparatus; intracellular membrane-bounded organelle; cytosol; nucleoplasm; chromosome; MutSalpha complex; mismatch repair complex; nuclear chromatin
ISCA1	6.8969e-09	0.206888	0.486	0.393	0.000252434	protein maturation by iron-sulfur cluster transfer; iron-sulfur cluster assembly; small molecule metabolic process	metal ion binding; structural molecule activity; iron-sulfur cluster binding; 2 iron, 2 sulfur cluster binding	mitochondrion; mitochondrial matrix
IQGAP2	7.32042e-09	-0.200722	0.485	0.592	0.000267935	signal transduction; regulation of GTPase activity; Arp2/3 complex-mediated actin nucleation; neutrophil degranulation; negative regulation of GTPase activity; thrombin-activated receptor signaling pathway	calmodulin binding; actin filament binding; phosphatidylinositol-3,4,5-trisphosphate binding; Rho GTPase binding; GTPase inhibitor activity; actin binding; Rac GTPase binding; Arp2/3 complex binding; protein binding	cytoplasm; cell surface; plasma membrane; cytosol; lamellipodium; filopodium; extracellular exosome; secretory granule membrane; actin cytoskeleton; microvillus
ZIC2	7.34706e-09	0.279296	0.452	0.37	0.00026891	multicellular organism development; cell differentiation; positive regulation of transcription, DNA-templated; regulation of transcription by RNA polymerase II; nervous system development; visual perception; central nervous system development; negative regulation of transcription, DNA-templated; brain development; positive regulation of DNA-binding transcription factor activity	nucleic acid binding; metal ion binding; DNA binding; DNA-binding transcription factor activity; chromatin DNA binding; DNA-binding transcription factor activity, RNA polymerase II-specific; RNA polymerase II regulatory region sequence-specific DNA binding	nucleus; cytoplasm; nuclear body
PTGES3	7.7726e-09	-0.170498	0.932	0.959	0.000284485	lipid metabolic process; fatty acid metabolic process; fatty acid biosynthetic process; regulation of cellular response to heat; xenobiotic metabolic process; telomere maintenance; signal transduction; positive regulation of phosphorylation; prostaglandin biosynthetic process; prostaglandin metabolic process; cyclooxygenase pathway; positive regulation of telomerase activity; telomere maintenance…	isomerase activity; protein binding; Hsp90 protein binding; unfolded protein binding; prostaglandin-E synthase activity; telomerase activity; chaperone binding; DNA polymerase binding	nucleus; cytoplasm; cytosol; nucleoplasm; chromosome, telomeric region; protein-containing complex; telomerase holoenzyme complex; chaperone complex
PPDPF	8.02329e-09	0.196796	0.959	0.961	0.00029366	multicellular organism development; cell differentiation
OSBPL1A	8.06909e-09	0.213902	0.505	0.412	0.000295337	lipid transport; cholesterol metabolic process; vesicle-mediated transport; antigen processing and presentation of exogenous peptide antigen via MHC class II; bile acid biosynthetic process	lipid binding; protein binding; phospholipid binding; cholesterol binding; sterol binding	endosome; intracellular membrane-bounded organelle; cytosol; membrane; extracellular exosome; late endosome
TCEAL2	8.07133e-09	-0.191589	0.301	0.409	0.000295419		WW domain binding	nucleus
BEX1	8.08659e-09	-0.23772	0.471	0.569	0.000295977	positive regulation of DNA-binding transcription factor activity; positive regulation of transcription by RNA polymerase II; multicellular organism development; cell differentiation; nervous system development	protein binding; RNA polymerase II activating transcription factor binding	nucleus; cytoplasm; transcription factor complex
MT1X	8.24537e-09	-0.150198	0.161	0.259	0.000301789	negative regulation of growth; cellular zinc ion homeostasis; detoxification of copper ion; cellular response to erythropoietin; cellular response to cadmium ion; cellular response to copper ion; cellular response to zinc ion; response to metal ion	metal ion binding; zinc ion binding; protein binding	nucleus; cytoplasm; perinuclear region of cytoplasm
LRRC17	8.5607e-09	-0.116048	0.231	0.34	0.00031333	ossification; negative regulation of osteoclast differentiation; bone marrow development	protein binding	extracellular space; extracellular region; extracellular matrix
PMEPA1	8.85077e-09	-0.170864	0.154	0.245	0.000323947	negative regulation of transforming growth factor beta receptor signaling pathway; negative regulation of SMAD protein complex assembly; androgen receptor signaling pathway; negative regulation of signal transduction; negative regulation of pathway-restricted SMAD protein phosphorylation	protein binding; R-SMAD binding; WW domain binding	membrane; integral component of membrane; intracellular membrane-bounded organelle; Golgi apparatus; Golgi membrane; plasma membrane; endosome; early endosome membrane; endosome membrane
RFC1	9.01891e-09	-0.185035	0.646	0.743	0.000330101	DNA repair; positive regulation of catalytic activity; DNA replication; translesion synthesis; transcription-coupled nucleotide-excision repair; DNA-dependent DNA replication; error-prone translesion synthesis; telomere maintenance via telomerase; DNA damage response, detection of DNA damage; nucleotide-excision repair, DNA incision, 5'-to lesion; nucleotide-excision repair, DNA incision; telomer…	nucleotide binding; ATP binding; DNA binding; protein binding; DNA clamp loader activity; enzyme activator activity; DNA clamp unloader activity; double-stranded DNA binding; protein domain specific binding; sequence-specific DNA binding	nucleus; nucleoplasm; extracellular exosome; DNA replication factor C complex; Elg1 RFC-like complex; nucleolus; cytoplasm; protein-containing complex
SEPTIN6	9.06885e-09	0.171713	0.253	0.169	0.000331929	cell division; cell cycle; cell differentiation; spermatogenesis; cilium assembly; viral process; cytoskeleton-dependent cytokinesis; mitotic cytokinesis	nucleotide binding; GTP binding; protein binding; GTPase activity	cytoplasm; motile cilium; chromosome; cytoskeleton; cell projection; septin complex; spindle; midbody; chromosome, centromeric region; kinetochore; condensed chromosome kinetochore; cilium; cleavage furrow; microtubule cytoskeleton; septin ring; sperm annulus; synaptic vesicle; septin collar; axon terminus; presynapse
CMBL	9.1441e-09	-0.200861	0.302	0.405	0.000334683	xenobiotic metabolic process	hydrolase activity	cytoplasm; cytosol; extracellular exosome
RPP21	9.43249e-09	-0.183321	0.517	0.609	0.000345239	tRNA processing; RNA phosphodiester bond hydrolysis; RNA phosphodiester bond hydrolysis, endonucleolytic; tRNA 5'-leader removal; response to drug	RNA binding; metal ion binding; hydrolase activity; ribonuclease P activity; ribonuclease P RNA binding	nucleus; nucleolus; nucleoplasm; multimeric ribonuclease P complex; nucleolar ribonuclease P complex
RPS6	9.74653e-09	0.109867	1	0.999	0.000356733	translation; rRNA processing; ribosomal small subunit biogenesis; G1/S transition of mitotic cell cycle; mitotic cell cycle; placenta development; T cell proliferation involved in immune response; activation-induced cell death of T cells; mitotic cell cycle checkpoint; gastrulation; mammalian oogenesis stage; T cell differentiation in thymus; glucose homeostasis; negative regulation of apoptotic …	RNA binding; structural constituent of ribosome; protein binding; protein kinase binding	nucleus; membrane; endoplasmic reticulum; cytosol; ribosome; cytosolic small ribosomal subunit; nucleolus; nucleoplasm; cytoplasm; polysome; dendrite; perinuclear region of cytoplasm; cytoplasmic ribonucleoprotein granule; ribonucleoprotein complex; cell body; small ribosomal subunit; intracellular
MSRB2	9.98595e-09	0.224326	0.485	0.401	0.000365496	oxidation-reduction process; response to oxidative stress; protein repair; actin filament polymerization	metal ion binding; oxidoreductase activity; actin binding; peptide-methionine (R)-S-oxide reductase activity; oxidoreductase activity, acting on a sulfur group of donors, disulfide as acceptor; zinc ion binding; L-methionine-(R)-S-oxide reductase activity	mitochondrion; cytosol
CYSTM1	1.04472e-08	0.200268	0.394	0.303	0.00038238	neutrophil degranulation		membrane; integral component of membrane; plasma membrane; extracellular exosome; tertiary granule membrane
PRKDC	1.05354e-08	-0.195152	0.852	0.901	0.000385607	positive regulation of transcription by RNA polymerase II; cellular response to insulin stimulus; phosphorylation; DNA repair; double-strand break repair via nonhomologous end joining; DNA recombination; cellular response to DNA damage stimulus; rhythmic process; immune system process; innate immune response; protein ubiquitination; double-strand break repair; positive regulation of double-strand…	RNA binding; nucleotide binding; protein serine/threonine kinase activity; ATP binding; kinase activity; transferase activity; DNA binding; protein binding; protein domain specific binding; protein kinase activity; transcription factor binding; double-stranded DNA binding; DNA-dependent protein kinase activity; enzyme binding	nucleus; membrane; nucleoplasm; nucleolus; cytosol; nuclear chromosome, telomeric region; transcription factor complex; protein-containing complex; protein-DNA complex; nonhomologous end joining complex; DNA-dependent protein kinase-DNA ligase 4 complex
CHEK1	1.05474e-08	-0.220152	0.361	0.466	0.000386046	protein phosphorylation; DNA damage checkpoint; G2/M transition of mitotic cell cycle; inner cell mass cell proliferation; DNA repair; cellular response to DNA damage stimulus; nucleus organization; mitotic cell cycle checkpoint; regulation of gene expression; regulation of transcription from RNA polymerase II promoter in response to UV-induced DNA damage; histone H3-T11 phosphorylation; regulati…	protein kinase activity; ATP binding; histone kinase activity (H3-T11 specific); nucleotide binding; protein serine/threonine kinase activity; kinase activity; transferase activity; protein binding; protein domain specific binding	intracellular membrane-bounded organelle; nucleoplasm; chromatin; nucleus; replication fork; cytoplasm; extracellular space; cytoskeleton; centrosome; microtubule organizing center; cytosol; protein-containing complex; chromosome, telomeric region; condensed nuclear chromosome
ATP5PD	1.10692e-08	-0.178578	0.795	0.859	0.000405143	ion transport; ATP synthesis coupled proton transport; ATP biosynthetic process; cristae formation; mitochondrial ATP synthesis coupled proton transport	protein binding; proton transmembrane transporter activity; ATPase activity; proton-transporting ATP synthase activity, rotational mechanism; transmembrane transporter activity	membrane; nucleoplasm; mitochondrion; mitochondrial inner membrane; mitochondrial proton-transporting ATP synthase complex, coupling factor F(o); mitochondrial proton-transporting ATP synthase, stator stalk; mitochondrial proton-transporting ATP synthase complex; proton-transporting ATP synthase complex, coupling factor F(o)
MAD2L2	1.13672e-08	-0.174371	0.429	0.535	0.000416051	negative regulation of DNA-binding transcription factor activity; negative regulation of canonical Wnt signaling pathway; negative regulation of epithelial to mesenchymal transition; cell division; DNA repair; cellular response to DNA damage stimulus; cell cycle; double-strand break repair; positive regulation of transcription, DNA-templated; positive regulation of peptidyl-serine phosphorylation…	protein binding; RNA polymerase II activating transcription factor binding; JUN kinase binding	nucleus; cytoplasm; nucleolus; cytosol; chromosome; cytoskeleton; spindle; nucleoplasm; site of double-strand break; anaphase-promoting complex; zeta DNA polymerase complex
HS6ST2	1.24746e-08	0.161795	0.277	0.189	0.000456581	glycosaminoglycan biosynthetic process; heparan sulfate proteoglycan biosynthetic process, enzymatic modification	transferase activity; sulfotransferase activity; heparan sulfate 6-O-sulfotransferase activity	membrane; integral component of membrane; nucleoplasm; Golgi membrane
CEMIP2	1.30133e-08	0.131367	0.176	0.103	0.000476301	metabolic process; multicellular organism development; angiogenesis; hyaluronan catabolic process; regulation of sprouting angiogenesis	hydrolase activity; hydrolase activity, acting on glycosyl bonds; hyalurononglucosaminidase activity; calcium ion binding; cadherin binding	membrane; integral component of membrane; plasma membrane; integral component of plasma membrane; extracellular exosome
BAZ1A	1.35775e-08	-0.220699	0.513	0.605	0.000496949	chromatin remodeling; histone acetylation; regulation of transcription by RNA polymerase II; DNA-dependent DNA replication	metal ion binding; protein binding	nucleus; CHRAC; ACF complex
TANC2	1.44646e-08	0.182145	0.297	0.207	0.000529419	in utero embryonic development	protein binding	glutamatergic synapse; postsynaptic density, intracellular component
LRFN4	1.45539e-08	-0.116765	0.113	0.198	0.000532687	regulation of postsynaptic density assembly; synaptic membrane adhesion; regulation of presynapse assembly	protein binding	membrane; integral component of membrane; cell surface; glutamatergic synapse; GABA-ergic synapse; integral component of postsynaptic density membrane; plasma membrane
C3orf14	1.51555e-08	-0.15557	0.201	0.302	0.000554707
CELF1	1.84475e-08	0.181791	0.527	0.433	0.000675196	mRNA processing; RNA splicing; regulation of alternative mRNA splicing, via spliceosome; regulation of RNA splicing; embryo development ending in birth or egg hatching; mRNA splice site selection; germ cell development; negative regulation of translation; RNA interference; spermatid development; positive regulation of multicellular organism growth	nucleic acid binding; RNA binding; protein binding; mRNA binding; pre-mRNA binding; translation repressor activity, mRNA regulatory element binding; BRE binding; translation initiation factor binding	nucleus; cytoplasm; membrane; nucleoplasm; ribonucleoprotein complex
PJA1	1.87893e-08	-0.16991	0.328	0.438	0.000687705	protein ubiquitination; protein catabolic process	metal ion binding; transferase activity; protein binding; ubiquitin protein ligase activity	cytoplasm
HNRNPA1	1.98747e-08	0.141983	0.992	0.992	0.000727435	mRNA processing; RNA splicing; mRNA transport; mRNA splicing, via spliceosome; viral process; positive regulation of telomere maintenance via telomerase; cellular response to sodium arsenite; fibroblast growth factor receptor signaling pathway; RNA metabolic process; negative regulation of telomere maintenance via telomerase; regulation of alternative mRNA splicing, via spliceosome; RNA export fr…	nucleic acid binding; RNA binding; protein binding; mRNA binding; protein domain specific binding; telomeric repeat-containing RNA binding; single-stranded DNA binding; single-stranded RNA binding; miRNA binding; pre-mRNA binding; G-rich strand telomeric DNA binding	nucleus; cytoplasm; membrane; nucleoplasm; spliceosomal complex; catalytic step 2 spliceosome; extracellular exosome; ribonucleoprotein complex
SPATA13	2.00463e-08	-0.170891	0.228	0.327	0.000733714	regulation of Rho protein signal transduction; cell migration; filopodium assembly; regulation of cell migration; lamellipodium assembly	Rho guanyl-nucleotide exchange factor activity; protein binding; guanyl-nucleotide exchange factor activity; Rac guanyl-nucleotide exchange factor activity	cytoplasm; membrane; cytosol; nucleoplasm; plasma membrane; cell projection; lamellipodium; filopodium; ruffle membrane
PRKCB	2.09036e-08	-0.129677	0.15	0.243	0.000765094	lipoprotein transport; protein phosphorylation; phosphorylation; intracellular signal transduction; positive regulation of nucleic acid-templated transcription; chromatin organization; apoptotic process; immune system process; adaptive immune response; regulation of transcription by RNA polymerase II; positive regulation of I-kappaB kinase/NF-kappaB signaling; B cell activation; peptidyl-serine p…	zinc ion binding; metal ion binding; nucleotide binding; protein kinase activity; protein serine/threonine kinase activity; ATP binding; kinase activity; transferase activity; protein binding; protein kinase C activity; nuclear receptor transcription coactivator activity; chromatin binding; histone binding; androgen receptor binding; protein kinase C binding; histone kinase activity (H3-T6 specif…	nucleus; cytoplasm; membrane; cytosol; nucleoplasm; plasma membrane; extracellular exosome; calyx of Held; presynaptic cytosol; presynapse
MPDZ	2.10473e-08	-0.198729	0.458	0.559	0.000770353	viral process; cell adhesion	protein binding; protein C-terminus binding	cytoplasm; membrane; plasma membrane; cell projection; cell junction; synapse; postsynaptic membrane; dendrite; bicellular tight junction; postsynaptic density; apical plasma membrane; neuron projection; apicolateral plasma membrane; cytoplasmic vesicle; Schmidt-Lanterman incisure
CD63	2.11685e-08	0.194133	0.904	0.876	0.000774788	protein transport; cell migration; neutrophil degranulation; platelet degranulation; regulation of vascular endothelial growth factor signaling pathway; cell-matrix adhesion; positive regulation of receptor internalization; cellular protein localization; endosome to melanosome transport; pigment granule maturation; regulation of potassium ion transmembrane transport; positive regulation of integr…	protein binding	membrane; integral component of membrane; lysosomal membrane; extracellular space; plasma membrane; extracellular region; melanosome; cell surface; lysosome; endosome; late endosome membrane; integral component of plasma membrane; extracellular exosome; endosome membrane; platelet dense granule membrane; multivesicular body membrane; intrinsic component of plasma membrane; azurophil granule membr…
BANF1	2.1425e-08	-0.17412	0.781	0.837	0.000784177	negative regulation of viral genome replication; viral process; response to virus; chromosome segregation; nuclear transport; establishment of integrated proviral latency; mitotic nuclear envelope reassembly; chromosome condensation; DNA integration	DNA binding; protein homodimerization activity; protein binding; identical protein binding; protein C-terminus binding; protein N-terminus binding; enzyme binding; LEM domain binding	nucleus; cytoplasm; cytosol; nucleoplasm; chromosome; nuclear envelope; condensed chromosome
GPC4	2.31862e-08	-0.168036	0.223	0.321	0.000848637	regulation of signal transduction; cell migration; retinoid metabolic process; glycosaminoglycan biosynthetic process; glycosaminoglycan catabolic process; Wnt signaling pathway, planar cell polarity pathway; regulation of neurotransmitter receptor localization to postsynaptic specialization membrane; synaptic membrane adhesion; regulation of protein localization to membrane; regulation of presyn…	coreceptor activity involved in Wnt signaling pathway, planar cell polarity pathway	nucleus; membrane; extracellular space; plasma membrane; extracellular region; collagen-containing extracellular matrix; anchored component of membrane; anchored component of plasma membrane; cell surface; synapse; extracellular exosome; lysosomal lumen; Golgi lumen; external side of plasma membrane; glutamatergic synapse; anchored component of presynaptic membrane
RPL37A	2.39961e-08	0.116116	1	1	0.000878282	translation; viral transcription; translational initiation; nuclear-transcribed mRNA catabolic process, nonsense-mediated decay; SRP-dependent cotranslational protein targeting to membrane	RNA binding; metal ion binding; structural constituent of ribosome; protein binding	nucleus; ribosome; focal adhesion; cytosol; extracellular exosome; cytosolic large ribosomal subunit; intracellular
DCTPP1	2.4017e-08	-0.184832	0.453	0.553	0.000879047	nucleoside triphosphate catabolic process; DNA protection; dCTP catabolic process	metal ion binding; nucleotide binding; hydrolase activity; protein binding; magnesium ion binding; identical protein binding; nucleoside-triphosphate diphosphatase activity; pyrophosphatase activity; pyrimidine deoxyribonucleotide binding; dCTP diphosphatase activity	nucleus; cytoplasm; mitochondrion; cytosol
STK33	2.89147e-08	0.163856	0.287	0.2	0.00105831	protein phosphorylation; phosphorylation; protein autophosphorylation; signal transduction in response to DNA damage; mitotic DNA damage checkpoint	nucleotide binding; protein kinase activity; protein serine/threonine kinase activity; ATP binding; kinase activity; transferase activity	cytoplasm; perinuclear region of cytoplasm; nucleus
MIAT	2.95051e-08	0.18251	0.359	0.264	0.00107992
ADGRL2	3.02265e-08	0.172319	0.26	0.174	0.00110632	G protein-coupled receptor signaling pathway; signal transduction; cell surface receptor signaling pathway; adenylate cyclase-activating G protein-coupled receptor signaling pathway; brain development	G protein-coupled receptor activity; carbohydrate binding; transmembrane signaling receptor activity; latrotoxin receptor activity	membrane; integral component of membrane; integral component of plasma membrane; neuron projection
MCM6	3.03375e-08	-0.160937	0.286	0.389	0.00111038	DNA replication initiation; cell cycle; DNA replication; G1/S transition of mitotic cell cycle; double-strand break repair via break-induced replication; DNA unwinding involved in DNA replication; pre-replicative complex assembly involved in nuclear cell cycle DNA replication; mitotic DNA replication	nucleotide binding; ATP binding; hydrolase activity; DNA binding; protein binding; DNA helicase activity; helicase activity; identical protein binding; single-stranded DNA binding; DNA replication origin binding; single-stranded 3'-5' DNA helicase activity	nucleus; nucleoplasm; MCM complex; nuclear chromosome, telomeric region
THSD7A	3.06843e-08	0.187866	0.284	0.195	0.00112308	cell differentiation; angiogenesis; actin cytoskeleton reorganization		membrane; integral component of membrane; plasma membrane; cell projection; extracellular region
GCSH	3.1261e-08	-0.181452	0.812	0.852	0.00114418	methylation; protein lipoylation; glycine decarboxylation via glycine cleavage system; glycine catabolic process	protein binding; aminomethyltransferase activity	mitochondrion; glycine cleavage complex; mitochondrial matrix
RPL8	3.4739e-08	0.100504	1	1	0.00127148	translation; cytoplasmic translation; viral transcription; translational initiation; nuclear-transcribed mRNA catabolic process, nonsense-mediated decay; SRP-dependent cotranslational protein targeting to membrane	RNA binding; structural constituent of ribosome; rRNA binding	cytoplasm; membrane; ribosome; large ribosomal subunit; focal adhesion; cytosolic large ribosomal subunit; cytosol; postsynaptic density; postsynapse; polysomal ribosome
NFE2L2	3.5225e-08	-0.200677	0.469	0.567	0.00128927	negative regulation of endothelial cell apoptotic process; cellular response to laminar fluid shear stress; positive regulation of transcription by RNA polymerase II; cellular response to tumor necrosis factor; regulation of transcription, DNA-templated; protein ubiquitination; positive regulation of transcription, DNA-templated; viral process; cellular response to oxidative stress; transcription…	DNA binding; DNA-binding transcription factor activity; protein binding; DNA-binding transcription factor activity, RNA polymerase II-specific; transcription regulatory region sequence-specific DNA binding; protein domain specific binding; RNA polymerase II activating transcription factor binding; transcription regulatory region DNA binding; RNA polymerase II distal enhancer sequence-specific DNA…	nucleus; cytoplasm; Golgi apparatus; centrosome; cytosol; nucleoplasm; plasma membrane; nuclear chromatin; protein-DNA complex; chromatin
MLLT3	3.6228e-08	-0.146975	0.158	0.248	0.00132598	regulation of transcription, DNA-templated; positive regulation of transcription, DNA-templated; regulation of transcription by RNA polymerase II; segment specification; anterior/posterior pattern specification; transcription by RNA polymerase II; transcription elongation from RNA polymerase II promoter; negative regulation of canonical Wnt signaling pathway; positive regulation of Wnt signaling …	protein binding; DNA-binding transcription factor activity, RNA polymerase II-specific; chromatin binding; histone binding; lysine-acetylated histone binding; modification-dependent protein binding	nucleus; chromosome; nucleoplasm; extracellular exosome; transcription elongation factor complex
KCNG1	3.63975e-08	-0.12487	0.172	0.267	0.00133218	transmembrane transport; ion transport; potassium ion transport; regulation of ion transmembrane transport; protein homooligomerization; potassium ion transmembrane transport; regulation of delayed rectifier potassium channel activity	ion channel activity; voltage-gated ion channel activity; voltage-gated potassium channel activity; potassium channel activity; delayed rectifier potassium channel activity; protein binding	membrane; integral component of membrane; voltage-gated potassium channel complex; plasma membrane
IRS2	3.67874e-08	0.215845	0.397	0.314	0.00134646	positive regulation of cell population proliferation; positive regulation of glucose import; response to glucose; lipid homeostasis; cellular response to insulin stimulus; signal transduction; insulin receptor signaling pathway; MAPK cascade; positive regulation of insulin secretion; axon guidance; positive regulation of phosphatidylinositol 3-kinase signaling; positive regulation of protein kina…	protein binding; insulin receptor binding; phosphatidylinositol 3-kinase binding; protein kinase binding; protein phosphatase binding; protein domain specific binding; 14-3-3 protein binding	cytoplasm; cytosol; plasma membrane; protein-containing complex
GNG4	3.81411e-08	-0.164962	0.264	0.366	0.001396	G protein-coupled receptor signaling pathway; signal transduction; regulation of G protein-coupled receptor signaling pathway; negative regulation of cell growth	GTPase activity; protein binding; G-protein beta-subunit binding	membrane; plasma membrane; heterotrimeric G-protein complex; G-protein beta/gamma-subunit complex; extracellular exosome
RPS18	3.86581e-08	0.103076	1	1	0.00141493	translation; viral transcription; translational initiation; nuclear-transcribed mRNA catabolic process, nonsense-mediated decay; SRP-dependent cotranslational protein targeting to membrane	nucleic acid binding; RNA binding; structural constituent of ribosome; protein binding; rRNA binding	nucleus; cytoplasm; membrane; cytosol; ribosome; cytosolic small ribosomal subunit; focal adhesion; nucleoplasm; extracellular exosome; postsynaptic density; small ribosomal subunit; intracellular; collagen trimer
DNMT1	3.97945e-08	-0.161964	0.468	0.575	0.00145652	positive regulation of vascular smooth muscle cell proliferation; negative regulation of gene expression; negative regulation of vascular associated smooth muscle cell apoptotic process; methylation; chromatin organization; Ras protein signal transduction; positive regulation of gene expression; negative regulation of transcription by RNA polymerase II; negative regulation of gene expression, epi…	zinc ion binding; metal ion binding; transferase activity; methyltransferase activity; DNA binding; protein binding; chromatin binding; promoter-specific chromatin binding; DNA (cytosine-5-)-methyltransferase activity; DNA-methyltransferase activity; RNA binding; methyl-CpG binding	nucleus; nucleoplasm; heterochromatin; replication fork; pericentric heterochromatin
MYO10	4.14393e-08	0.215449	0.825	0.776	0.00151672	signal transduction; Fc-gamma receptor signaling pathway involved in phagocytosis; regulation of cell shape; cytoskeleton-dependent intracellular transport; regulation of filopodium assembly; positive regulation of cell-cell adhesion	nucleotide binding; ATP binding; motor activity; actin binding; protein binding; calmodulin binding; actin filament binding; phosphatidylinositol-3,4,5-trisphosphate binding; spectrin binding; actin-dependent ATPase activity; plus-end directed microfilament motor activity	cytoplasm; membrane; nucleolus; cytosol; myosin complex; plasma membrane; cytoskeleton; cell projection; lamellipodium; cell cortex; ruffle; filopodium membrane; filopodium tip; filopodium; neuron projection; neuronal cell body
NUAK2	4.21154e-08	0.110354	0.128	0.068	0.00154147	protein phosphorylation; phosphorylation; negative regulation of apoptotic process; apoptotic process; intracellular signal transduction; actin cytoskeleton organization; cellular response to glucose starvation	metal ion binding; nucleotide binding; protein kinase activity; protein serine/threonine kinase activity; ATP binding; kinase activity; transferase activity; magnesium ion binding; protein binding	nucleus; cytoplasm; nuclear speck
IGSF3	4.34109e-08	-0.130958	0.114	0.195	0.00158888	lacrimal gland development		membrane; integral component of membrane; cell surface
GINS2	4.61461e-08	-0.185483	0.355	0.458	0.00168899	DNA replication; DNA duplex unwinding; double-strand break repair via break-induced replication; DNA strand elongation involved in DNA replication	protein binding; 3'-5' DNA helicase activity	nucleus; nucleoplasm; replication fork protection complex; GINS complex
RNPC3	4.65664e-08	-0.153272	0.206	0.301	0.00170438	mRNA processing; RNA splicing; mRNA splicing, via spliceosome	nucleic acid binding; RNA binding; pre-mRNA intronic binding; U12 snRNA binding; protein binding	nucleus; nucleoplasm; spliceosomal complex; U12-type spliceosomal complex
HMGXB4	4.9227e-08	-0.167682	0.505	0.599	0.00180176	Wnt signaling pathway; endosome to lysosome transport; negative regulation of Wnt signaling pathway	DNA binding	nucleus; NURF complex
ABHD3	5.05891e-08	-0.144905	0.15	0.236	0.00185161	lipid metabolic process; phosphatidylcholine metabolic process; cellular lipid metabolic process; phosphatidylcholine biosynthetic process	hydrolase activity; phospholipase A2 activity; phospholipase A2 activity (consuming 1,2-dipalmitoylphosphatidylcholine); phospholipase A2 activity consuming 1,2-dioleoylphosphatidylethanolamine); carboxylic ester hydrolase activity; lipase activity; acylglycerol lipase activity; phospholipase A1 activity; phosphatidylserine 1-acylhydrolase activity; 1-acyl-2-lysophosphatidylserine acylhydrolase a…	membrane; integral component of membrane; plasma membrane
FAM241B	5.2014e-08	-0.142956	0.162	0.248	0.00190376		protein binding	membrane; integral component of membrane; intracellular membrane-bounded organelle
SEPTIN11	5.27051e-08	-0.179441	0.924	0.957	0.00192906	cell division; cell cycle; protein heterooligomerization; cilium assembly; cytoskeleton-dependent cytokinesis; regulation of synapse organization	nucleotide binding; GTP binding; protein binding; GTPase activity	cytoplasm; cytoskeleton; cell projection; cell junction; synapse; axon; stress fiber; microtubule cytoskeleton; dendritic spine; septin ring; septin complex; postsynapse; glutamatergic synapse; GABA-ergic synapse; postsynaptic specialization of symmetric synapse
BLCAP	5.45449e-08	0.201811	0.459	0.376	0.0019964	cell cycle; apoptotic process; apoptotic nuclear changes	protein binding	membrane; integral component of membrane
TMEM131	5.48078e-08	-0.171052	0.35	0.454	0.00200602			membrane; integral component of membrane
HES1	5.66184e-08	-0.218653	0.646	0.726	0.00207229	positive regulation of cell population proliferation; positive regulation of transcription by RNA polymerase II; ventricular septum morphogenesis; outflow tract morphogenesis; regulation of transcription, DNA-templated; Notch signaling pathway; cell differentiation; negative regulation of transcription by RNA polymerase II; anterior/posterior pattern specification; regulation of neurogenesis; ner…	protein dimerization activity; DNA binding; DNA-binding transcription factor activity; protein homodimerization activity; protein binding; sequence-specific DNA binding; RNA polymerase II regulatory region sequence-specific DNA binding; DNA-binding transcription factor activity, RNA polymerase II-specific; DNA-binding transcription repressor activity, RNA polymerase II-specific; transcription fac…	nucleus; nucleoplasm; cytoplasm
SAT1	5.80816e-08	0.308382	0.562	0.481	0.00212584	polyamine metabolic process; polyamine catabolic process; spermidine acetylation; regulation of cell population proliferation; angiogenesis; polyamine biosynthetic process; putrescine catabolic process	diamine N-acetyltransferase activity; protein binding; N-acetyltransferase activity; transferase activity; transferase activity, transferring acyl groups; identical protein binding; spermidine binding	cytoplasm; cytosol; intracellular
ATP1B3	5.9554e-08	0.202136	0.756	0.717	0.00217974	potassium ion transport; sodium ion transport; protein stabilization; ion transport; leukocyte migration; establishment or maintenance of transmembrane electrochemical gradient; potassium ion import across plasma membrane; ion transmembrane transport; positive regulation of sodium ion export across plasma membrane; regulation of cardiac conduction; cellular sodium ion homeostasis; cellular potass…	ATPase binding; sodium:potassium-exchanging ATPase activity; ATPase activator activity	plasma membrane; sodium:potassium-exchanging ATPase complex; membrane; integral component of membrane; melanosome; extracellular exosome; cytoplasm; caveola
GSE1	6.09201e-08	-0.15776	0.354	0.463	0.00222973		protein binding
CCDC71L	6.13947e-08	-0.113081	0.103	0.179	0.00224711	positive regulation of fat cell differentiation; cellular lipid metabolic process
TCF7L1	6.15645e-08	-0.16369	0.226	0.323	0.00225332	canonical Wnt signaling pathway; regulation of transcription by RNA polymerase II; chromatin organization; Wnt signaling pathway; regulation of transcription, DNA-templated; beta-catenin-TCF complex assembly; regulation of Wnt signaling pathway	beta-catenin binding; DNA binding; DNA-binding transcription factor activity; sequence-specific DNA binding; DNA-binding transcription factor activity, RNA polymerase II-specific; transcription regulatory region DNA binding; chromatin binding	nucleus; cytosol; nucleoplasm; transcription factor complex
SHC3	6.15796e-08	0.12467	0.162	0.095	0.00225387	intracellular signal transduction; signal transduction; central nervous system development; MAPK cascade; axon guidance; transmembrane receptor protein tyrosine kinase signaling pathway; epidermal growth factor receptor signaling pathway; Ras protein signal transduction; learning or memory; synaptic transmission, glutamatergic	protein binding; protein kinase binding; phosphotyrosine residue binding; receptor tyrosine kinase binding	plasma membrane; cytosol
SOX12	6.3928e-08	-0.132343	0.204	0.303	0.00233983	regulation of transcription by RNA polymerase II; regulation of transcription, DNA-templated; cell differentiation; positive regulation of transcription by RNA polymerase II; spinal cord development; cell fate commitment; protein-DNA complex assembly	transcription coactivator activity; DNA binding; DNA-binding transcription factor activity, RNA polymerase II-specific; transcription regulatory region sequence-specific DNA binding; DNA-binding transcription activator activity, RNA polymerase II-specific	nucleus; nucleoplasm; nuclear transcription factor complex; nuclear chromatin; protein-DNA complex
RPL17	6.5947e-08	0.103884	1	1	0.00241373	translation; cytoplasmic translation; viral transcription; translational initiation; nuclear-transcribed mRNA catabolic process, nonsense-mediated decay; SRP-dependent cotranslational protein targeting to membrane	RNA binding; structural constituent of ribosome; protein binding	nucleus; ribosome; large ribosomal subunit; cytosolic large ribosomal subunit; cytosol; intracellular
PCSK1N	6.90266e-08	-0.159523	0.229	0.328	0.00252644	neuropeptide signaling pathway; negative regulation of endopeptidase activity; response to dietary excess; response to cold; peptide hormone processing	endopeptidase inhibitor activity; signaling receptor binding; serine-type endopeptidase inhibitor activity	Golgi apparatus; extracellular region; extracellular space; trans-Golgi network; secretory granule
LINC01551	7.13255e-08	0.186917	0.953	0.964	0.00261059
GNPDA1	8.37174e-08	-0.175494	0.326	0.427	0.00306414	carbohydrate metabolic process; N-acetylglucosamine metabolic process; N-acetylglucosamine catabolic process; single fertilization; UDP-N-acetylglucosamine biosynthetic process; generation of precursor metabolites and energy; glucosamine catabolic process; N-acetylneuraminate catabolic process	hydrolase activity; glucosamine-6-phosphate deaminase activity; protein binding; identical protein binding	cytoplasm; cytosol; extracellular exosome
CD46	8.60408e-08	-0.182892	0.447	0.547	0.00314918	single fertilization; viral entry into host cell; immune system process; innate immune response; adaptive immune response; regulation of complement activation; positive regulation of gene expression; positive regulation of T cell proliferation; viral process; T cell mediated immunity; negative regulation of gene expression; positive regulation of transforming growth factor beta production; comple…	protein binding; signaling receptor activity; cadherin binding; virus receptor activity	membrane; integral component of membrane; plasma membrane; cytoplasmic vesicle; cell surface; focal adhesion; extracellular exosome; integral component of plasma membrane; inner acrosomal membrane
ENC1	9.04099e-08	-0.147815	0.394	0.508	0.00330909	nervous system development; protein ubiquitination; multicellular organism development; proteasomal ubiquitin-independent protein catabolic process; negative regulation of translation; positive regulation of neuron projection development	actin binding; protein binding	nucleus; cytoplasm; cytoskeleton; nuclear matrix; Cul3-RING ubiquitin ligase complex; nuclear chromatin; nucleoplasm; nucleolus; neuronal cell body
GLI3	9.20038e-08	-0.1738	0.784	0.842	0.00336743	regulation of transcription, DNA-templated; positive regulation of transcription, DNA-templated; smoothened signaling pathway; negative regulation of transcription by RNA polymerase II; anterior/posterior pattern specification; dorsal/ventral pattern formation; embryonic organ development; positive regulation of transcription by RNA polymerase II; limb morphogenesis; negative regulation of canoni…	nucleic acid binding; metal ion binding; DNA binding; DNA-binding transcription factor activity; protein binding; DNA-binding transcription factor activity, RNA polymerase II-specific; DNA-binding transcription activator activity, RNA polymerase II-specific; beta-catenin binding; histone deacetylase binding; histone acetyltransferase binding; RNA polymerase II regulatory region sequence-specific …	nucleus; cytoplasm; cytosol; cell projection; cilium; ciliary tip; nucleoplasm; ciliary base; axoneme; nuclear speck; transcriptional repressor complex
RRP15	9.63446e-08	-0.174284	0.365	0.468	0.00352631	rRNA processing		preribosome, large subunit precursor
PDLIM3	9.86244e-08	-0.13067	0.174	0.263	0.00360975	actin filament organization; heart development; actin cytoskeleton organization; muscle structure development	metal ion binding; protein binding; cytoskeletal protein binding; structural constituent of muscle; actin binding; muscle alpha-actinin binding	cytoplasm; actin cytoskeleton; filamentous actin; stress fiber; cell-cell adherens junction; Z disc
DUT	9.9204e-08	-0.208219	0.657	0.726	0.00363097	dUMP biosynthetic process; dUTP catabolic process; dUTP metabolic process; nucleotide metabolic process; nucleobase-containing compound metabolic process; nucleobase-containing small molecule interconversion; DNA replication	magnesium ion binding; dUTP diphosphatase activity; RNA binding; hydrolase activity; protein binding	nucleoplasm; nucleus; mitochondrion; extracellular exosome
FARP1	1.00094e-07	-0.186121	0.49	0.579	0.00366354	regulation of Rho protein signal transduction; multicellular organism development; negative regulation of phosphatase activity; synapse assembly; dendrite morphogenesis; retrograde trans-synaptic signaling by trans-synaptic protein complex; postsynaptic actin cytoskeleton organization; regulation of presynapse assembly	Rho guanyl-nucleotide exchange factor activity; cytoskeletal protein binding; guanyl-nucleotide exchange factor activity; Rac guanyl-nucleotide exchange factor activity; Rac GTPase binding	cytoskeleton; cytoplasm; membrane; cytosol; plasma membrane; cell projection; cell junction; synapse; dendrite; extrinsic component of cytoplasmic side of plasma membrane; filopodium; dendritic spine; neuron projection; extrinsic component of postsynaptic membrane; glutamatergic synapse
NDUFAF2	1.00624e-07	-0.176539	0.387	0.488	0.00368295	respiratory electron transport chain; cellular respiration; negative regulation of insulin secretion involved in cellular response to glucose stimulus; reactive oxygen species metabolic process; mitochondrial respiratory chain complex I assembly	NADH dehydrogenase (ubiquinone) activity; electron transfer activity	membrane; mitochondrion; mitochondrial inner membrane
PGAM1	1.01314e-07	-0.177531	0.73	0.805	0.00370821	glycolytic process; neutrophil degranulation; gluconeogenesis; canonical glycolysis; regulation of glycolytic process; respiratory burst; regulation of pentose-phosphate shunt	isomerase activity; hydrolase activity; catalytic activity; protein binding; bisphosphoglycerate mutase activity; phosphoglycerate mutase activity; intramolecular transferase activity, phosphotransferases; protein kinase binding	cytoplasm; membrane; cytosol; extracellular region; extracellular exosome; secretory granule lumen; ficolin-1-rich granule lumen
TSPAN7	1.01474e-07	0.180624	0.301	0.218	0.00371407	viral process		membrane; integral component of membrane; integral component of plasma membrane
PRPF4B	1.0311e-07	-0.18761	0.671	0.755	0.00377394	mRNA processing; RNA splicing; protein phosphorylation; phosphorylation; mRNA splicing, via spliceosome	RNA binding; nucleotide binding; protein kinase activity; protein serine/threonine kinase activity; ATP binding; kinase activity; transferase activity; protein binding	nucleus; nuclear speck; spliceosomal complex; catalytic step 2 spliceosome; chromosome
FDPS	1.05995e-07	-0.159272	0.739	0.807	0.00387952	lipid metabolic process; steroid biosynthetic process; steroid metabolic process; isoprenoid biosynthetic process; sterol biosynthetic process; cholesterol metabolic process; cholesterol biosynthetic process; viral process; regulation of cholesterol biosynthetic process; geranyl diphosphate biosynthetic process; farnesyl diphosphate biosynthetic process	RNA binding; metal ion binding; transferase activity; dimethylallyltranstransferase activity; geranyltranstransferase activity	cytoplasm; cytosol; nucleoplasm; membrane; integral component of membrane
BSG	1.14499e-07	0.164646	0.836	0.799	0.00419078	leukocyte migration; axon guidance; cell surface receptor signaling pathway; pyruvate metabolic process; extracellular matrix organization; extracellular matrix disassembly; protein localization to plasma membrane; homophilic cell adhesion via plasma membrane adhesion molecules; dendrite self-avoidance; embryo implantation; odontogenesis of dentin-containing tooth; response to peptide hormone; re…	carbohydrate binding; protein binding; cadherin binding; cell-cell adhesion mediator activity; mannose binding	membrane; integral component of membrane; intracellular membrane-bounded organelle; mitochondrion; plasma membrane; melanosome; focal adhesion; integral component of plasma membrane; extracellular exosome; axon; Golgi membrane; acrosomal membrane; sarcolemma; membrane raft
STIM2	1.19565e-07	0.176757	0.257	0.178	0.0043762	cellular calcium ion homeostasis; activation of store-operated calcium channel activity; ion transport; calcium ion transport; calcium ion transmembrane transport; positive regulation of calcium ion transport; store-operated calcium entry	calcium channel regulator activity; protein binding; metal ion binding; calcium ion binding; store-operated calcium channel activity	cell; membrane; integral component of membrane; plasma membrane; endoplasmic reticulum; endoplasmic reticulum membrane
ANK2	1.25287e-07	0.229023	0.339	0.261	0.00458563	signal transduction; positive regulation of gene expression; protein stabilization; regulation of cardiac muscle contraction by regulation of the release of sequestered calcium ion; regulation of ventricular cardiac muscle cell membrane repolarization; regulation of heart rate; protein transport; cytoskeleton organization; endocytosis; endoplasmic reticulum to Golgi vesicle-mediated transport; pr…	protein binding; ion channel binding; enzyme binding; ATPase binding; protein kinase binding; protein binding, bridging; phosphorylation-dependent protein binding; spectrin binding; structural constituent of cytoskeleton	cytoplasm; membrane; mitochondrion; plasma membrane; cytoskeleton; cell junction; synapse; postsynaptic membrane; lysosome; endosome; early endosome; cytosol; basolateral plasma membrane; recycling endosome; M band; apical plasma membrane; Z disc; T-tubule; sarcolemma; axon initial segment; intercalated disc; A band; costamere; neuron projection; membrane raft
CCDC173	1.27784e-07	0.15525	0.22	0.144	0.00467703
GRB10	1.31354e-07	0.165563	0.301	0.217	0.00480768	negative regulation of glucose import; negative regulation of insulin receptor signaling pathway; signal transduction; negative regulation of Wnt signaling pathway; insulin receptor signaling pathway; axon guidance; positive regulation of cold-induced thermogenesis; positive regulation of vascular endothelial growth factor receptor signaling pathway; positive regulation of signal transduction; ne…	protein binding; insulin receptor binding; SH3/SH2 adaptor activity	cytoplasm; cytosol; protein-containing complex; plasma membrane
MRPL18	1.33034e-07	-0.151163	0.442	0.544	0.00486916	translation; mitochondrial translational elongation; mitochondrial translational termination; rRNA import into mitochondrion	RNA binding; structural constituent of ribosome; 5S rRNA binding	mitochondrion; ribosome; extracellular space; mitochondrial large ribosomal subunit; mitochondrial inner membrane; mitochondrial ribosome; intracellular
SYNC	1.33536e-07	-0.178009	0.43	0.535	0.00488755	intermediate filament-based process		cytoplasm; intermediate filament; perinuclear region of cytoplasm; cytosol; Z disc; neuromuscular junction; sarcolemma
RRAS	1.37385e-07	-0.14988	0.131	0.211	0.00502841	signal transduction; negative regulation of cell migration; face morphogenesis; positive regulation of angiogenesis; Ras protein signal transduction; regulation of ERK1 and ERK2 cascade; leukocyte differentiation; regulation of protein kinase B signaling	nucleotide binding; GTPase activity; GTP binding; protein binding; GDP binding; protein-containing complex binding	membrane; plasma membrane; focal adhesion; extracellular exosome
MCM2	1.41945e-07	-0.161856	0.206	0.293	0.00519533	DNA replication initiation; cell cycle; apoptotic process; DNA replication; negative regulation of DNA helicase activity; G1/S transition of mitotic cell cycle; double-strand break repair via break-induced replication; DNA unwinding involved in DNA replication; mitotic DNA replication initiation; pre-replicative complex assembly involved in nuclear cell cycle DNA replication; nucleosome assembly;…	metal ion binding; nucleotide binding; ATP binding; hydrolase activity; DNA binding; protein binding; DNA helicase activity; helicase activity; single-stranded DNA binding; DNA replication origin binding; 3'-5' DNA helicase activity; single-stranded DNA helicase activity; enzyme binding; histone binding	nucleus; cytoplasm; nucleoplasm; microtubule cytoskeleton; MCM complex; nuclear chromosome, telomeric region; chromatin; nuclear origin of replication recognition complex
LMNB1	1.45473e-07	-0.164322	0.349	0.458	0.00532444	interleukin-12-mediated signaling pathway	protein binding; structural molecule activity; double-stranded DNA binding; phospholipase binding; sequence-specific double-stranded DNA binding	intermediate filament; nucleus; membrane; nuclear membrane; nucleoplasm; nuclear inner membrane; nuclear envelope; lamin filament; nuclear matrix
MCM3	1.46172e-07	-0.198338	0.338	0.432	0.00535006	DNA duplex unwinding; DNA replication initiation; cell cycle; DNA replication; G1/S transition of mitotic cell cycle; double-strand break repair via break-induced replication; mitotic DNA replication initiation; pre-replicative complex assembly involved in nuclear cell cycle DNA replication; DNA strand elongation involved in DNA replication	nucleotide binding; ATP binding; hydrolase activity; DNA binding; protein binding; DNA helicase activity; helicase activity; single-stranded DNA binding; DNA replication origin binding	perinuclear region of cytoplasm; nucleus; membrane; centrosome; nucleoplasm; MCM complex; nuclear chromosome, telomeric region; alpha DNA polymerase:primase complex; cytoplasm
SLC39A6	1.48178e-07	-0.169039	0.449	0.546	0.00542347	transmembrane transport; ion transport; metal ion transport; zinc ion transport; zinc ion transmembrane transport; cellular zinc ion homeostasis; zinc ion import across plasma membrane	metal ion transmembrane transporter activity; zinc ion transmembrane transporter activity	membrane; integral component of membrane; plasma membrane; cell surface; integral component of plasma membrane; lamellipodium membrane; endoplasmic reticulum
SEC11C	1.49564e-07	0.179599	0.503	0.412	0.00547419	proteolysis; signal peptide processing	hydrolase activity; peptidase activity; serine-type peptidase activity	membrane; integral component of membrane; endoplasmic reticulum; endoplasmic reticulum membrane; organelle membrane; intracellular membrane-bounded organelle; signal peptidase complex
IFI27L2	1.54631e-07	-0.163758	0.571	0.667	0.00565963	apoptotic process		membrane; integral component of membrane; mitochondrion; mitochondrial membrane
ZFHX4	1.5823e-07	-0.192151	0.706	0.785	0.00579137	regulation of transcription, DNA-templated; negative regulation of transcription by RNA polymerase II; positive regulation of transcription, DNA-templated	nucleic acid binding; zinc ion binding; metal ion binding; DNA binding; sequence-specific DNA binding; RNA polymerase II proximal promoter sequence-specific DNA binding; DNA-binding transcription factor activity, RNA polymerase II-specific; transcription regulatory region DNA binding	nucleus; nuclear chromatin
LSM7	1.63839e-07	-0.149712	0.86	0.91	0.00599665	mRNA processing; RNA splicing; mRNA splicing, via spliceosome; nuclear-transcribed mRNA catabolic process; exonucleolytic catabolism of deadenylated mRNA	RNA binding; protein binding; U6 snRNA binding	nucleus; spliceosomal complex; nucleoplasm; cytosol; U4/U6 x U5 tri-snRNP complex; Lsm1-7-Pat1 complex; U2-type precatalytic spliceosome; catalytic step 2 spliceosome; U2-type prespliceosome; U12-type spliceosomal complex; U6 snRNP; Lsm2-8 complex
TRPS1	1.63936e-07	0.161819	0.288	0.206	0.0060002	regulation of transcription, DNA-templated; negative regulation of transcription by RNA polymerase II; skeletal system development; regulation of chondrocyte differentiation; protein heterooligomerization	nucleic acid binding; zinc ion binding; metal ion binding; DNA binding; DNA-binding transcription factor activity; sequence-specific DNA binding; protein binding; DNA-binding transcription factor activity, RNA polymerase II-specific; DNA-binding transcription repressor activity, RNA polymerase II-specific; protein domain specific binding; RNA polymerase II regulatory region sequence-specific DNA …	nucleus; nucleoplasm; nuclear chromatin; protein-containing complex
SPATS2	1.63991e-07	-0.148903	0.38	0.478	0.00600223		protein binding; RNA binding	cytoplasm; cytosol
HINT1	1.64113e-07	0.129077	0.992	0.991	0.00600671	apoptotic process; positive regulation of calcium-mediated signaling; signal transduction; regulation of transcription, DNA-templated; intrinsic apoptotic signaling pathway by p53 class mediator; purine ribonucleotide catabolic process	nucleotide binding; hydrolase activity; catalytic activity; protein kinase C binding	nucleus; cytoplasm; cytosol; plasma membrane; extracellular exosome; histone deacetylase complex; cytoskeleton
PHLPP1	1.65062e-07	-0.147263	0.366	0.472	0.00604144	apoptotic process; protein dephosphorylation; regulation of apoptotic process; negative regulation of protein kinase B signaling; regulation of p38MAPK cascade; regulation of T cell anergy; entrainment of circadian clock; regulation of MAPK cascade; regulation of JNK cascade	metal ion binding; hydrolase activity; catalytic activity; phosphoprotein phosphatase activity; protein binding; protein serine/threonine phosphatase activity	nucleus; cytoplasm; membrane; plasma membrane; cytosol; nuclear membrane
ADK	1.65688e-07	-0.155484	0.385	0.486	0.00606433	purine ribonucleoside salvage; phosphorylation; purine-containing compound salvage; AMP salvage; dATP biosynthetic process; ribonucleoside monophosphate biosynthetic process; AMP biosynthetic process	phosphotransferase activity, alcohol group as acceptor; adenosine kinase activity; RNA binding; metal ion binding; nucleotide binding; ATP binding; kinase activity; transferase activity	nucleus; cytoplasm; cytosol; nucleoplasm
LSM4	1.66234e-07	-0.184464	0.784	0.823	0.00608435	RNA processing; mRNA processing; RNA splicing; mRNA splicing, via spliceosome; nuclear-transcribed mRNA catabolic process; cytoplasmic mRNA processing body assembly; spliceosomal snRNP assembly; exonucleolytic catabolism of deadenylated mRNA	RNA binding; protein binding; U6 snRNA binding; PH domain binding	nucleus; spliceosomal complex; P-body; nucleoplasm; cytosol; U4/U6 x U5 tri-snRNP complex; protein-containing complex; U2-type precatalytic spliceosome; U6 snRNP; Lsm2-8 complex; membrane; neuron projection
LSAMP	1.97168e-07	0.189899	0.324	0.241	0.00721654	cell adhesion; nervous system development	protein binding	membrane; cytosol; plasma membrane; extracellular region; anchored component of membrane; integral component of membrane
SRGAP3	2.00039e-07	-0.171822	0.679	0.757	0.00732161	signal transduction; positive regulation of GTPase activity; regulation of small GTPase mediated signal transduction; negative regulation of cell migration	protein binding; GTPase activator activity; Rac GTPase binding	cytoplasm; cytosol
JPH1	2.03298e-07	-0.145866	0.148	0.227	0.00744092	release of sequestered calcium ion into cytosol; regulation of ryanodine-sensitive calcium-release channel activity; calcium ion transport into cytosol; muscle organ development	calcium-release channel activity; structural constituent of muscle	membrane; integral component of membrane; nucleus; nucleoplasm; endoplasmic reticulum; endoplasmic reticulum membrane; plasma membrane; junctional membrane complex; sarcoplasmic reticulum; sarcoplasmic reticulum membrane; junctional sarcoplasmic reticulum membrane; Z disc
LRRC58	2.06148e-07	-0.154901	0.365	0.467	0.00754522		protein binding
PAX6	2.08154e-07	0.220013	0.864	0.862	0.00761865	positive regulation of gene expression; positive regulation of transcription by RNA polymerase II; positive regulation of transcription, DNA-templated; regulation of transcription, DNA-templated; multicellular organism development; cell differentiation; negative regulation of transcription by RNA polymerase II; visual perception; central nervous system development; animal organ morphogenesis; tra…	DNA binding; sequence-specific DNA binding; protein binding; DNA-binding transcription factor activity, RNA polymerase II-specific; R-SMAD binding; DNA-binding transcription factor activity; protein kinase binding; RNA polymerase II proximal promoter sequence-specific DNA binding; transcription factor binding; histone acetyltransferase binding; RNA polymerase II core promoter sequence-specific DN…	nucleus; cytoplasm; cytosol; nucleoplasm; nuclear chromatin; membrane; integral component of membrane
SREBF1	2.14246e-07	-0.121716	0.083	0.15	0.00784161	positive regulation of transcription by RNA polymerase II; lipid metabolic process; steroid metabolic process; intracellular receptor signaling pathway; cholesterol metabolic process; negative regulation of transcription by RNA polymerase II; regulation of autophagy of mitochondrion; regulation of protein targeting to mitochondrion; circadian rhythm; regulation of transcription by RNA polymerase …	protein dimerization activity; DNA binding; DNA-binding transcription factor activity; protein binding; RNA polymerase II proximal promoter sequence-specific DNA binding; DNA-binding transcription factor activity, RNA polymerase II-specific; RNA polymerase II regulatory region sequence-specific DNA binding; DNA-binding transcription activator activity, RNA polymerase II-specific; chromatin bindin…	nucleus; cytoplasm; membrane; integral component of membrane; endoplasmic reticulum; endoplasmic reticulum membrane; Golgi apparatus; Golgi membrane; cytoplasmic vesicle; nuclear chromatin; ER to Golgi transport vesicle membrane; nucleoplasm; cytosol; nuclear envelope; protein-containing complex; intracellular membrane-bounded organelle
ATAD2	2.15927e-07	-0.192372	0.267	0.361	0.00790314	regulation of transcription, DNA-templated; positive regulation of transcription, DNA-templated; chromatin organization; positive regulation of transcription by RNA polymerase II; regulation of transcription by RNA polymerase II; negative regulation of chromatin silencing	nucleotide binding; ATP binding; hydrolase activity; protein binding; ATPase activity; histone binding; chromatin binding	nucleus; nucleoplasm; extracellular exosome
EIF4EBP1	2.17598e-07	-0.173213	0.404	0.496	0.00796431	negative regulation of translational initiation; regulation of translation; negative regulation of translation; positive regulation of mitotic cell cycle; G1/S transition of mitotic cell cycle; TOR signaling; IRES-dependent translational initiation of linear mRNA; response to ischemia; insulin receptor signaling pathway; lung development; negative regulation of protein complex assembly; response …	eukaryotic initiation factor 4E binding; protein binding; translation repressor activity; translation initiation factor binding; protein phosphatase 2A binding	cytosol; cytoplasm; nucleus; protein-containing complex; glutamatergic synapse; postsynaptic cytosol
NME4	2.23545e-07	-0.170092	0.637	0.726	0.00818196	phosphorylation; lipid transport; nucleoside diphosphate phosphorylation; GTP biosynthetic process; UTP biosynthetic process; CTP biosynthetic process; nucleotide metabolic process; purine nucleotide metabolic process; pyrimidine nucleotide metabolic process; nucleoside metabolic process; nucleobase-containing small molecule interconversion	metal ion binding; nucleotide binding; ATP binding; kinase activity; transferase activity; protein binding; nucleoside diphosphate kinase activity; lipid binding; cardiolipin binding	membrane; mitochondrion; mitochondrial matrix; mitochondrial intermembrane space; mitochondrial inner membrane
CCNI	2.32405e-07	0.130578	0.96	0.962	0.00850625	protein phosphorylation; regulation of cell cycle; spermatogenesis; regulation of cyclin-dependent protein serine/threonine kinase activity; mitotic cell cycle phase transition	protein kinase binding; protein kinase activity; cyclin-dependent protein serine/threonine kinase regulator activity	nucleus; cytoplasm; cyclin-dependent protein kinase holoenzyme complex
OCIAD2	2.39372e-07	-0.121451	0.19	0.279	0.00876124	response to bacterium		endosome
MPST	2.44489e-07	-0.144964	0.408	0.51	0.00894855	transsulfuration; response to toxic substance; sulfur amino acid catabolic process; cyanate catabolic process; hydrogen sulfide biosynthetic process; kidney development; liver development; spinal cord development	transferase activity; thiosulfate sulfurtransferase activity; 3-mercaptopyruvate sulfurtransferase activity; identical protein binding	cytoplasm; mitochondrion; cell junction; synapse; extracellular exosome; mitochondrial matrix; neuron projection; cytosol
EPS8	2.54107e-07	0.137219	0.214	0.141	0.00930059	positive regulation of signal transduction; barbed-end actin filament capping; actin filament bundle assembly; Rho protein signal transduction; regulation of cell shape; exit from mitosis; actin polymerization-dependent cell motility; regulation of actin filament length; Rac protein signal transduction; regulation of Rho protein signal transduction; dendritic cell migration; actin crosslink forma…	actin binding; signaling adaptor activity; protein binding; Rac GTPase binding; Rac guanyl-nucleotide exchange factor activity	cytoplasm; membrane; plasma membrane; cell projection; cell junction; synapse; growth cone; extracellular exosome; cell cortex; ruffle membrane; stereocilium; neuron projection; vesicle; brush border; postsynaptic density; NMDA selective glutamate receptor complex; stereocilium bundle; stereocilium tip; glutamatergic synapse
POU3F4	2.58858e-07	0.135032	0.258	0.176	0.00947447	regulation of transcription, DNA-templated; regulation of transcription by RNA polymerase II; brain development; transcription by RNA polymerase II; sensory perception of sound; forebrain neuron differentiation; inner ear development; cochlea morphogenesis; negative regulation of mesenchymal cell apoptotic process	DNA binding; DNA-binding transcription factor activity; sequence-specific DNA binding; RNA polymerase II regulatory region sequence-specific DNA binding; AT DNA binding; double-stranded DNA binding	nucleus
TAGLN2	2.69413e-07	-0.145943	0.188	0.275	0.0098608	platelet degranulation; epithelial cell differentiation	protein binding; cadherin binding	extracellular region; cytosol; extracellular exosome; vesicle
GRID2	2.76982e-07	0.153858	0.183	0.115	0.0101378	ion transport; ion transmembrane transport; ionotropic glutamate receptor signaling pathway; modulation of chemical synaptic transmission; positive regulation of synapse assembly; synaptic transmission, glutamatergic; excitatory synapse assembly; heterophilic cell-cell adhesion via plasma membrane cell adhesion molecules; glutamate receptor signaling pathway; regulation of neuron projection devel…	ion channel activity; signaling receptor activity; ionotropic glutamate receptor activity; ligand-gated ion channel activity; protein binding; glutamate receptor activity; scaffold protein binding; transmitter-gated ion channel activity involved in regulation of postsynaptic membrane potential; PDZ domain binding	membrane; integral component of membrane; plasma membrane; cell junction; synapse; postsynaptic membrane; integral component of plasma membrane; dendritic spine; postsynaptic density membrane; ionotropic glutamate receptor complex; somatodendritic compartment; parallel fiber to Purkinje cell synapse; glutamatergic synapse; integral component of postsynaptic density membrane
PDGFD	2.82755e-07	-0.112655	0.08	0.147	0.0103491	multicellular organism development; positive regulation of ERK1 and ERK2 cascade; positive regulation of cell division; platelet-derived growth factor receptor signaling pathway; positive regulation of cell population proliferation; positive regulation of cell migration; positive regulation of phosphatidylinositol 3-kinase signaling; positive regulation of protein autophosphorylation; positive re…	growth factor activity; platelet-derived growth factor receptor binding	membrane; extracellular region; extracellular space; endoplasmic reticulum lumen; Golgi membrane
CENPV	2.87037e-07	-0.162195	0.759	0.826	0.0105058	cell division; cell cycle; positive regulation of cytokinesis; ameboidal-type cell migration; pericentric heterochromatin assembly; regulation of chromosome organization; centromere complex assembly	metal ion binding; carbon-sulfur lyase activity	nucleus; cytoplasm; chromosome; cytoskeleton; spindle; chromosome, centromeric region; kinetochore; condensed chromosome kinetochore; spindle midzone; microtubule cytoskeleton
CHD3	2.94038e-07	-0.1434	0.21	0.299	0.0107621	chromatin organization; DNA duplex unwinding; centrosome cycle; regulation of transcription, DNA-templated; regulation of signal transduction by p53 class mediator; regulation of transcription by RNA polymerase II; spindle organization; ATP-dependent chromatin remodeling; chromatin assembly or disassembly	RNA binding; metal ion binding; nucleotide binding; ATP binding; hydrolase activity; zinc ion binding; DNA binding; protein binding; DNA helicase activity; helicase activity; ATPase activity; double-stranded DNA helicase activity; nucleosome-dependent ATPase activity	nucleus; cytoplasm; nucleolus; cytoskeleton; microtubule organizing center; centrosome; nucleoplasm; NuRD complex
KCNN3	3.14631e-07	-0.191723	0.24	0.327	0.0115158	ion transport; potassium ion transport; potassium ion transmembrane transport	calmodulin binding; calcium-activated potassium channel activity; small conductance calcium-activated potassium channel activity	membrane; integral component of membrane; plasma membrane; neuron projection; neuronal cell body; cytoplasm
QPRT	3.2527e-07	-0.159878	0.358	0.455	0.0119052	NAD biosynthetic process; quinolinate catabolic process; pyridine nucleotide biosynthetic process; protein complex oligomerization; NAD metabolic process; quinolinate metabolic process	catalytic activity; nicotinate-nucleotide diphosphorylase (carboxylating) activity; transferase activity, transferring pentosyl groups; transferase activity; transferase activity, transferring glycosyl groups; protein homodimerization activity; protein binding	cytoplasm; cytosol; extracellular exosome
LRRTM3	3.28219e-07	0.147021	0.164	0.1	0.0120131	positive regulation of synapse assembly; presynapse assembly; positive regulation of amyloid-beta formation	protein binding	membrane; integral component of membrane; plasma membrane; cell junction; synapse; postsynaptic membrane; extracellular space; extracellular matrix; glutamatergic synapse; integral component of postsynaptic density membrane
CA12	3.34701e-07	-0.157323	0.358	0.466	0.0122504	bicarbonate transport; chloride ion homeostasis	zinc ion binding; metal ion binding; lyase activity; carbonate dehydratase activity	membrane; integral component of membrane; plasma membrane
MDM1	3.39146e-07	-0.140372	0.185	0.273	0.0124131	negative regulation of centriole replication; retina development in camera-type eye; photoreceptor cell maintenance	microtubule binding	nucleus; cytoplasm; centrosome; cytosol; cytoskeleton; microtubule; microtubule organizing center; centriole
GOLGA8A	3.50964e-07	-0.169804	0.232	0.319	0.0128456	Golgi organization		membrane; Golgi apparatus; cytosol; Golgi cis cisterna; cis-Golgi network; Golgi cisterna membrane
YIPF6	3.59776e-07	0.145857	0.461	0.364	0.0131682	intestinal epithelial cell development	protein binding; identical protein binding	membrane; integral component of membrane; Golgi apparatus; Golgi membrane; endoplasmic reticulum; trans-Golgi network; Golgi medial cisterna; Golgi trans cisterna; cis-Golgi network; COPII-coated ER to Golgi transport vesicle
PCYT2	3.66305e-07	-0.128286	0.115	0.189	0.0134071	lipid metabolic process; biosynthetic process; phosphatidylethanolamine biosynthetic process; phospholipid biosynthetic process	transferase activity; catalytic activity; nucleotidyltransferase activity; ethanolamine-phosphate cytidylyltransferase activity	endoplasmic reticulum membrane
PITPNB	3.90004e-07	-0.153588	0.329	0.431	0.0142745	phospholipid transport; lipid metabolic process; retrograde vesicle-mediated transport, Golgi to endoplasmic reticulum; nucleus organization	phospholipid transporter activity; lipid binding; phosphatidylcholine binding; phosphatidylinositol binding; phosphatidylcholine transporter activity; phosphatidylinositol transfer activity	cytoplasm; Golgi apparatus; endoplasmic reticulum membrane; Golgi membrane; intracellular
GUK1	3.97612e-07	0.166767	0.784	0.744	0.014553	phosphorylation; purine nucleotide metabolic process; GMP metabolic process; GDP metabolic process; nucleobase-containing small molecule interconversion; dGDP biosynthetic process; GDP-mannose metabolic process; glycoprotein transport; ATP metabolic process; dGMP metabolic process; dATP metabolic process; GDP biosynthetic process; nucleotide phosphorylation	nucleotide binding; ATP binding; kinase activity; transferase activity; protein binding; guanylate kinase activity	cytosol; photoreceptor inner segment
WDR76	4.08499e-07	-0.115314	0.089	0.157	0.0149515	cellular response to DNA damage stimulus; regulation of DNA damage checkpoint	protein binding; DNA binding; enzyme binding	nucleus; heterochromatin; site of DNA damage
NTPCR	4.26312e-07	0.165475	0.364	0.282	0.0156034	dephosphorylation	RNA binding; nucleotide binding; ATP binding; hydrolase activity; nucleoside-triphosphatase activity; nucleotide phosphatase activity, acting on free nucleotides	membrane
CDC42BPA	4.45535e-07	0.120327	0.214	0.141	0.016307	protein phosphorylation; phosphorylation; intracellular signal transduction; actin cytoskeleton organization; actomyosin structure organization; cell migration; peptidyl-threonine phosphorylation; actin cytoskeleton reorganization	metal ion binding; nucleotide binding; protein kinase activity; protein serine/threonine kinase activity; ATP binding; kinase activity; transferase activity; protein binding; magnesium ion binding; identical protein binding	cytoplasm; cell projection; lamellipodium; cell leading edge; extracellular exosome; cytoskeleton; cell-cell junction; actomyosin
RAC3	4.46459e-07	-0.15049	0.305	0.4	0.0163408	small GTPase mediated signal transduction; regulation of small GTPase mediated signal transduction; Rho protein signal transduction; regulation of cell shape; actin cytoskeleton organization; actin filament organization; regulation of actin cytoskeleton organization; intracellular signal transduction; establishment or maintenance of cell polarity; cell projection assembly; positive regulation of …	nucleotide binding; GTPase activity; GTP binding; protein binding; calcium-dependent protein binding; protein kinase binding	cytoplasm; membrane; plasma membrane; cytoskeleton; cell projection; perinuclear region of cytoplasm; neuron projection; cytosol; lamellipodium; extracellular exosome; cell periphery; endomembrane system; cell cortex; neuronal cell body; growth cone; filamentous actin; intracellular
KLHDC8B	4.48299e-07	0.146333	0.25	0.173	0.0164082	cell division; cell cycle; nuclear chromosome segregation; mitotic nuclear division; mitotic cytokinetic process	protein binding	cytoplasm; cytosol; midbody; intercellular bridge; cellularization cleavage furrow
GPRC5B	4.49281e-07	0.165817	0.302	0.221	0.0164441	G protein-coupled receptor signaling pathway; signal transduction; activation of protein kinase activity; positive regulation of inflammatory response; positive regulation of protein tyrosine kinase activity; positive regulation of I-kappaB kinase/NF-kappaB signaling; positive regulation of canonical Wnt signaling pathway; positive regulation of macrophage cytokine production; positive regulation…	G protein-coupled receptor activity; protein kinase binding; G protein-coupled receptor binding; protein kinase activator activity	membrane; integral component of membrane; intracellular membrane-bounded organelle; nucleus; nucleolus; cytosol; plasma membrane; extracellular space; cytoplasmic vesicle; cytoplasmic vesicle membrane; cell surface; receptor complex; extracellular exosome
F3	4.51712e-07	0.11499	0.135	0.076	0.0165331	positive regulation of angiogenesis; positive regulation of protein kinase B signaling; positive regulation of platelet-derived growth factor receptor signaling pathway; activation of cysteine-type endopeptidase activity involved in apoptotic process; positive regulation of cell migration; blood coagulation; hemostasis; cytokine-mediated signaling pathway; positive regulation of endothelial cell …	protein binding; cytokine receptor activity; protease binding; phospholipid binding; serine-type endopeptidase activity	extracellular space; membrane; integral component of membrane; extracellular region; cell surface; plasma membrane; collagen-containing extracellular matrix; intrinsic component of external side of plasma membrane; serine-type peptidase complex
TCP1	4.62256e-07	-0.165309	0.689	0.765	0.016919	protein stabilization; protein folding; tubulin complex assembly; interleukin-12-mediated signaling pathway; positive regulation of telomere maintenance via telomerase; positive regulation of telomerase activity; scaRNA localization to Cajal body; positive regulation of establishment of protein localization to telomere; positive regulation of protein localization to Cajal body; positive regulatio…	RNA binding; nucleotide binding; ATP binding; protein binding; unfolded protein binding; ubiquitin protein ligase binding	cytoplasm; cytosol; cytoskeleton; microtubule; microtubule organizing center; extracellular exosome; centrosome; pericentriolar material; heterochromatin; acrosomal vesicle; zona pellucida receptor complex; nuclear heterochromatin; Golgi apparatus; chaperonin-containing T-complex; cell body
CCT6A	4.74591e-07	-0.164461	0.845	0.894	0.0173705	protein stabilization; protein folding; positive regulation of telomere maintenance via telomerase; positive regulation of establishment of protein localization to telomere; positive regulation of protein localization to Cajal body; positive regulation of telomerase RNA localization to Cajal body	RNA binding; nucleotide binding; ATP binding; unfolded protein binding; protein binding; WD40-repeat domain binding	cytoplasm; cytosol; microtubule; extracellular exosome; chaperonin-containing T-complex
MAP9	4.79457e-07	0.171649	0.597	0.508	0.0175486	spindle assembly; mitotic cytokinesis; cell division; cell cycle; regulation of mitotic cytokinesis; mitotic spindle assembly; regulation of mitotic centrosome separation; regulation of mitotic spindle organization	microtubule binding	cytoplasm; cytoskeleton; microtubule; spindle; spindle midzone; mitotic spindle; axon; astral microtubule; mitotic spindle midzone; aster; microtubule cytoskeleton
MT-ND4	4.83571e-07	0.145203	0.985	0.992	0.0176992	oxidation-reduction process; mitochondrial electron transport, NADH to ubiquinone; aerobic respiration; ATP synthesis coupled electron transport; response to hypoxia; in utero embryonic development; aging; cerebellum development; response to nicotine; response to ethanol; mitochondrial respiratory chain complex I assembly; electron transport coupled proton transport	NADH dehydrogenase (ubiquinone) activity; NADH dehydrogenase activity; ubiquinone binding	membrane; integral component of membrane; mitochondrion; respirasome; mitochondrial membrane; mitochondrial respiratory chain complex I; mitochondrial inner membrane
TMX1	4.96656e-07	-0.191321	0.407	0.486	0.0181781	oxidation-reduction process; cell redox homeostasis; response to endoplasmic reticulum stress	disulfide oxidoreductase activity	membrane; integral component of membrane; endoplasmic reticulum; endoplasmic reticulum membrane; cell
RGS12	4.99217e-07	-0.119349	0.15	0.229	0.0182718	signal transduction; regulation of catalytic activity; positive regulation of GTPase activity; G protein-coupled receptor signaling pathway; negative regulation of signal transduction; regulation of G protein-coupled receptor signaling pathway	GTPase regulator activity; GTPase activator activity; GTPase activity; protein binding	nucleus; cytoplasm; nucleolus; cytosol; cell projection; cell junction; synapse; dendrite; plasma membrane; nuclear matrix; condensed nuclear chromosome
PTOV1	5.01525e-07	-0.158405	0.568	0.654	0.0183563	positive regulation of transcription by RNA polymerase II		nucleus; cytoplasm; membrane; plasma membrane; perinuclear region of cytoplasm; nuclear transcription factor complex
FADS2	5.14045e-07	-0.171305	0.33	0.422	0.0188146	oxidation-reduction process; lipid metabolic process; fatty acid metabolic process; fatty acid biosynthetic process; unsaturated fatty acid biosynthetic process; alpha-linolenic acid metabolic process; linoleic acid metabolic process	oxidoreductase activity; linoleoyl-CoA desaturase activity; stearoyl-CoA 9-desaturase activity	membrane; integral component of membrane; endoplasmic reticulum; endoplasmic reticulum membrane; integral component of plasma membrane
EXTL3	5.20419e-07	0.122796	0.203	0.131	0.0190478	protein glycosylation; positive regulation of cell growth; IRE1-mediated unfolded protein response; heparan sulfate proteoglycan biosynthetic process	transferase activity, transferring glycosyl groups; metal ion binding; transferase activity; glucuronyl-galactosyl-proteoglycan 4-alpha-N-acetylglucosaminyltransferase activity	integral component of membrane; membrane; endoplasmic reticulum; endoplasmic reticulum membrane; Golgi apparatus
ATP5F1D	5.26711e-07	-0.161773	0.825	0.866	0.0192782	ion transport; ATP synthesis coupled proton transport; ATP biosynthetic process; cristae formation; mitochondrial ATP synthesis coupled proton transport; oxidative phosphorylation; response to copper ion; aerobic respiration; mitochondrial proton-transporting ATP synthase complex assembly	ATP binding; protein binding; proton-transporting ATP synthase activity, rotational mechanism; ATPase activity; transmembrane transporter activity; ADP binding	membrane; mitochondrial inner membrane; mitochondrion; proton-transporting ATP synthase complex, catalytic core F(1); mitochondrial matrix; mitochondrial proton-transporting ATP synthase complex; mitochondrial proton-transporting ATP synthase complex, catalytic core F(1)
CRABP1	5.50228e-07	-0.207826	0.11	0.182	0.0201389	retinoic acid catabolic process; signal transduction; multicellular organism development	protein binding; lipid binding; retinoic acid binding; retinal binding; retinol binding; retinoid binding	cytoplasm; cytosol
MRPS24	5.65676e-07	-0.173749	0.672	0.726	0.0207043	mitochondrial translation; mitochondrial translational elongation; mitochondrial translational termination	RNA binding; structural constituent of ribosome	mitochondrion; ribosome; mitochondrial inner membrane; mitochondrial small ribosomal subunit
SNRPC	5.88466e-07	-0.164792	0.676	0.75	0.0215384	mRNA splicing, via spliceosome; spliceosomal snRNP assembly; mRNA 5'-splice site recognition	nucleic acid binding; RNA binding; zinc ion binding; metal ion binding; protein homodimerization activity; protein binding; mRNA binding; U1 snRNA binding; single-stranded RNA binding; pre-mRNA 5'-splice site binding; U1 snRNP binding	nucleus; nucleoplasm; commitment complex; U1 snRNP; U2-type prespliceosome; Cajal body
RMI2	5.88759e-07	-0.122341	0.133	0.209	0.0215492	DNA replication; DNA repair; regulation of signal transduction by p53 class mediator; negative regulation of double-strand break repair via homologous recombination; regulation of sister chromatid segregation; maintenance of rDNA	DNA binding; protein binding	nucleus; nuclear speck; cytosol; nucleoplasm
POU3F2	5.97059e-07	0.211612	0.428	0.346	0.021853	regulation of transcription, DNA-templated; regulation of transcription by RNA polymerase II; cell differentiation; brain development; nervous system development; neuron development; neuron fate specification; neuron differentiation; positive regulation of cell population proliferation; epidermis development; negative regulation of gene expression; astrocyte development; Schwann cell development;…	DNA binding; DNA-binding transcription factor activity; sequence-specific DNA binding; protein binding; identical protein binding; DNA-binding transcription factor activity, RNA polymerase II-specific; RNA polymerase II proximal promoter sequence-specific DNA binding; DNA-binding transcription activator activity, RNA polymerase II-specific; transcription coactivator activity	nucleus; nuclear chromatin; transcription factor complex
CROT	6.00561e-07	0.176208	0.267	0.193	0.0219811	lipid metabolic process; fatty acid metabolic process; protein targeting to peroxisome; fatty acid beta-oxidation using acyl-CoA oxidase; fatty acid beta-oxidation; generation of precursor metabolites and energy; carnitine metabolic process; fatty acid transport; coenzyme A metabolic process; medium-chain fatty acid metabolic process	transferase activity; transferase activity, transferring acyl groups; carnitine O-octanoyltransferase activity	intracellular membrane-bounded organelle; peroxisome; cytosol; peroxisomal matrix
LARS	6.5008e-07	-0.174051	0.741	0.822	0.0237936	translation; tRNA aminoacylation for protein translation; aminoacyl-tRNA metabolism involved in translational fidelity; leucyl-tRNA aminoacylation; cellular response to amino acid starvation; regulation of cell size; negative regulation of autophagy; cellular response to amino acid stimulus; cellular response to leucine; cellular response to leucine starvation; glutaminyl-tRNA aminoacylation; pos…	nucleotide binding; ATP binding; ligase activity; protein binding; aminoacyl-tRNA ligase activity; aminoacyl-tRNA editing activity; leucine-tRNA ligase activity; glutamine-tRNA ligase activity; GTPase activator activity	cytoplasm; cytosol; nuclear body; aminoacyl-tRNA synthetase multienzyme complex; endoplasmic reticulum; lysosome; endomembrane system
USP34	6.59341e-07	-0.145366	0.418	0.509	0.0241325	protein deubiquitination; proteolysis; ubiquitin-dependent protein catabolic process; Wnt signaling pathway; protein K48-linked deubiquitination; positive regulation of canonical Wnt signaling pathway	hydrolase activity; peptidase activity; cysteine-type peptidase activity; thiol-dependent ubiquitinyl hydrolase activity; thiol-dependent ubiquitin-specific protease activity; protein binding; cysteine-type endopeptidase activity	cytoplasm; cytosol
MTHFS	6.61639e-07	0.107116	0.204	0.134	0.0242166	folic acid-containing compound biosynthetic process; tetrahydrofolate interconversion; folic acid metabolic process; tetrahydrofolate metabolic process; glutamate metabolic process; formate metabolic process; folic acid catabolic process	metal ion binding; nucleotide binding; ATP binding; ligase activity; 5-formyltetrahydrofolate cyclo-ligase activity; folic acid binding	cytoplasm; cytosol; mitochondrion; mitochondrial matrix
NDUFA6	6.96796e-07	-0.168	0.806	0.856	0.0255034	oxidation-reduction process; mitochondrial respiratory chain complex I assembly; mitochondrial electron transport, NADH to ubiquinone; response to oxidative stress	NADH dehydrogenase (ubiquinone) activity	membrane; mitochondrial inner membrane; mitochondrion; respirasome; mitochondrial membrane; mitochondrial respiratory chain complex I
LMAN1	7.07891e-07	0.177545	0.396	0.32	0.0259095	protein transport; endoplasmic reticulum to Golgi vesicle-mediated transport; vesicle-mediated transport; Golgi organization; blood coagulation; COPII vesicle coating; endoplasmic reticulum organization; positive regulation of organelle organization; protein folding; protein N-linked glycosylation via asparagine; negative regulation of protein targeting to mitochondrion	metal ion binding; carbohydrate binding; protein binding; mannose binding; unfolded protein binding	membrane; integral component of membrane; cytosol; endoplasmic reticulum; endoplasmic reticulum membrane; Golgi apparatus; cytoplasm; Golgi membrane; endoplasmic reticulum-Golgi intermediate compartment; COPII-coated ER to Golgi transport vesicle; extracellular exosome; collagen-containing extracellular matrix; ER to Golgi transport vesicle membrane; endoplasmic reticulum-Golgi intermediate compa…
MAP2	7.20268e-07	0.209864	0.727	0.678	0.0263625	microtubule bundle formation; central nervous system neuron development; microtubule cytoskeleton organization; neuron projection development; regulation of cellular protein localization; regulation of microtubule polymerization; dendrite development; negative regulation of axon extension; negative regulation of microtubule polymerization; dendrite morphogenesis; positive regulation of anterograd…	protein binding; microtubule binding; tubulin binding; calmodulin binding; dystroglycan binding; tau protein binding; structural molecule activity	cytoplasm; neuronal cell body; nucleolus; cytosol; cytoskeleton; cell projection; microtubule; dendrite; neuron projection; microtubule associated complex; axon initial segment; dendritic growth cone; dendrite cytoplasm; dendritic shaft; axon hillock; dendritic branch; basal dendrite; primary dendrite; distal dendrite; apical distal dendrite; dendritic filopodium; proximal dendrite; proximal neur…
SLAIN1	7.48483e-07	-0.112884	0.113	0.186	0.0273952		protein binding	cytoplasm; cytoskeleton
GDPD1	7.4998e-07	0.145037	0.2	0.132	0.02745	lipid metabolic process; phospholipid metabolic process; glycerophospholipid catabolic process; N-acylethanolamine metabolic process	phosphoric diester hydrolase activity; metal ion binding; hydrolase activity; lysophospholipase activity; alkylglycerophosphoethanolamine phosphodiesterase activity	membrane; integral component of membrane; cytoplasm; perinuclear region of cytoplasm; endoplasmic reticulum membrane
NDUFB11	7.52358e-07	-0.128849	0.916	0.94	0.027537	oxidation-reduction process; mitochondrial respiratory chain complex I assembly; mitochondrial electron transport, NADH to ubiquinone	protein binding	membrane; integral component of membrane; mitochondrion; mitochondrial inner membrane; respirasome; mitochondrial respiratory chain complex I
ATAD5	7.57842e-07	-0.134104	0.25	0.342	0.0277378	cellular response to DNA damage stimulus; positive regulation of DNA replication; positive regulation of cell cycle G2/M phase transition; DNA clamp unloading; immunoglobulin production; intrinsic apoptotic signaling pathway in response to DNA damage; positive regulation of B cell proliferation; nuclear DNA replication; B cell proliferation; signal transduction in response to DNA damage; intrinsi…	ATP binding; nucleotide binding; protein binding; DNA binding; DNA clamp unloader activity	nucleus; Elg1 RFC-like complex
NUDT1	7.6031e-07	-0.159924	0.347	0.439	0.0278281	DNA repair; response to oxidative stress; nucleobase-containing small molecule catabolic process; purine nucleotide catabolic process; dGTP catabolic process; DNA protection; dATP catabolic process; aging; male gonad development; response to cadmium ion	RNA binding; metal ion binding; hydrolase activity; protein binding; GTPase activity; 8-oxo-7,8-dihydroguanosine triphosphate pyrophosphatase activity; snoRNA binding; 8-oxo-7,8-dihydrodeoxyguanosine triphosphate pyrophosphatase activity; GTP diphosphatase activity; ATP diphosphatase activity	nucleus; cytoplasm; cytosol; mitochondrion; mitochondrial matrix; acrosomal vesicle; extracellular space; plasma membrane; nuclear membrane
EID1	8.0889e-07	-0.129363	0.95	0.975	0.0296062	negative regulation of transcription by RNA polymerase II; regulation of histone acetylation; regulation of cell differentiation; cell cycle; cell differentiation; negative regulation of transcription, DNA-templated	protein binding; transcription corepressor activity; histone acetyltransferase binding; histone acetyltransferase regulator activity	nucleus; cytoplasm; nucleoplasm; cytoplasmic ribonucleoprotein granule
RNH1	8.22236e-07	-0.167568	0.559	0.639	0.0300947	negative regulation of catalytic activity; mRNA catabolic process; regulation of angiogenesis	protein binding; ribonuclease inhibitor activity	cytoplasm; cytosol; nucleoplasm; extracellular exosome; angiogenin-PRI complex
TXNRD1	8.36164e-07	-0.158202	0.369	0.462	0.0306044	oxidation-reduction process; cell redox homeostasis; cellular oxidant detoxification; electron transport chain; signal transduction; nucleobase-containing small molecule interconversion; cellular response to oxidative stress; regulation of lipid metabolic process; selenium compound metabolic process; mesoderm formation; gastrulation; cell population proliferation	oxidoreductase activity; flavin adenine dinucleotide binding; protein binding; protein disulfide oxidoreductase activity; electron transfer activity; oxidoreductase activity, acting on a sulfur group of donors, NAD(P) as acceptor; thioredoxin-disulfide reductase activity; nucleotide binding	nucleus; cytoplasm; nucleoplasm; fibrillar center; mitochondrion; cytosol; extracellular exosome; cell
COA6	8.7524e-07	-0.156101	0.422	0.515	0.0320347	respiratory chain complex IV assembly; plasma membrane ATP synthesis coupled electron transport	RNA binding; protein binding; copper ion binding	mitochondrion; plasma membrane; mitochondrial intermembrane space
ARID4A	8.75563e-07	0.166087	0.517	0.428	0.0320465	chromatin organization; regulation of gene expression by genetic imprinting; spermatogenesis; histone H4-K20 trimethylation; histone H3-K9 trimethylation; positive regulation of transcription by RNA polymerase II; erythrocyte development; histone H3-K4 trimethylation; establishment of Sertoli cell barrier; cell differentiation; regulation of transcription by RNA polymerase II; negative regulation…	DNA binding; transcription regulatory region DNA binding	nucleus; cytosol; nucleoplasm; plasma membrane; transcriptional repressor complex
DRAP1	8.77806e-07	-0.165571	0.652	0.734	0.0321286	negative regulation of transcription by RNA polymerase II	DNA binding; protein heterodimerization activity; protein binding; identical protein binding; transcription coregulator activity; transcription corepressor activity; DNA-binding transcription factor activity	nucleus
PHGDH	9.21991e-07	-0.163095	0.618	0.71	0.0337458	oxidation-reduction process; L-serine biosynthetic process; cellular amino acid biosynthetic process; electron transport chain; brain development; cellular amino acid metabolic process; glutamine metabolic process; glycine metabolic process; L-serine metabolic process; threonine metabolic process; gamma-aminobutyric acid metabolic process; regulation of gene expression; taurine metabolic process;…	oxidoreductase activity; oxidoreductase activity, acting on the CH-OH group of donors, NAD or NADP as acceptor; NAD binding; L-malate dehydrogenase activity; phosphoglycerate dehydrogenase activity; electron transfer activity	cytosol; extracellular exosome
TRIM2	9.37898e-07	-0.153422	0.33	0.427	0.034328	protein ubiquitination; proteasome-mediated ubiquitin-dependent protein catabolic process; protein polyubiquitination; regulation of neuron apoptotic process	zinc ion binding; metal ion binding; transferase activity; protein binding; ubiquitin-protein transferase activity; ubiquitin protein ligase activity	cytoplasm; intracellular
SRP14	9.50631e-07	0.116345	0.991	0.994	0.0347941	SRP-dependent cotranslational protein targeting to membrane; neutrophil degranulation; protein targeting to ER; response to drug; cotranslational protein targeting to membrane	RNA binding; protein binding; 7S RNA binding; endoplasmic reticulum signal peptide binding	nucleus; cytoplasm; signal recognition particle; extracellular region; cytosol; signal recognition particle, endoplasmic reticulum targeting; secretory granule lumen; ficolin-1-rich granule lumen
YY1	9.66342e-07	-0.133023	0.634	0.724	0.0353691	DNA repair; DNA recombination; cellular response to DNA damage stimulus; cell differentiation; spermatogenesis; negative regulation of transcription by RNA polymerase II; protein deubiquitination; regulation of transcription by RNA polymerase II; double-strand break repair via homologous recombination; cellular response to UV; negative regulation of interferon-beta production; response to UV-C; r…	nucleic acid binding; metal ion binding; DNA binding; protein binding; sequence-specific DNA binding; RNA polymerase II proximal promoter sequence-specific DNA binding; DNA-binding transcription factor activity, RNA polymerase II-specific; proximal promoter sequence-specific DNA binding; enhancer sequence-specific DNA binding; transcription coactivator activity; four-way junction DNA binding; tra…	nucleus; nuclear chromatin; transcription factor complex; nucleoplasm; nuclear matrix; PcG protein complex; Ino80 complex; cytoplasm
DPYSL2	9.73555e-07	-0.177345	0.636	0.697	0.0356331	axon guidance; brain development; cytoskeleton organization; regulation of axon extension; regulation of neuron differentiation; multicellular organism development; cell differentiation; nervous system development; endocytosis; nucleobase-containing compound metabolic process; signal transduction; response to amphetamine; regulation of neuron projection development; positive regulation of glutama…	hydrolase activity, acting on carbon-nitrogen (but not peptide) bonds; microtubule binding; hydrolase activity; protein binding; identical protein binding; hydrolase activity, acting on carbon-nitrogen (but not peptide) bonds, in cyclic amides; dihydropyrimidinase activity; protein kinase binding	cytoplasm; membrane; cytosol; plasma membrane; cytoskeleton; microtubule; extracellular exosome; axon; dendrite; growth cone; protein-containing complex; neuron projection; neuronal cell body; terminal bouton; myelin sheath; presynapse
BRD7	1.0178e-06	-0.170362	0.645	0.707	0.0372524	cell cycle; Wnt signaling pathway; positive regulation of transcription, DNA-templated; negative regulation of cell population proliferation; negative regulation of transcription, DNA-templated; regulation of signal transduction by p53 class mediator; regulation of transcription by RNA polymerase II; negative regulation of G1/S transition of mitotic cell cycle; positive regulation of histone acet…	protein binding; transcription coactivator activity; transcription corepressor activity; transcription regulatory region DNA binding; p53 binding; lysine-acetylated histone binding; transcription factor binding; histone binding	nucleus; cytosol; nucleoplasm; cytoplasm
GADD45GIP1	1.05939e-06	-0.161196	0.66	0.724	0.0387747	cell cycle; mitotic cell cycle arrest; viral process; mitochondrial translational elongation; mitochondrial translational termination	protein binding	nucleus; mitochondrion; ribosome; mitochondrial matrix
MFAP2	1.06171e-06	-0.150243	0.2	0.279	0.0388596	extracellular matrix organization; positive regulation of cold-induced thermogenesis; embryonic eye morphogenesis; post-embryonic eye morphogenesis	extracellular matrix structural constituent	extracellular region; microfibril; collagen-containing extracellular matrix
EPN2	1.0644e-06	-0.136505	0.353	0.442	0.0389581	endocytosis; negative regulation of sprouting angiogenesis; positive regulation of Notch signaling pathway; membrane organization; negative regulation of vascular endothelial growth factor receptor signaling pathway	lipid binding; protein binding; cadherin binding	clathrin coat of endocytic vesicle; cytoplasm; intracellular membrane-bounded organelle; cytoplasmic vesicle; clathrin-coated vesicle; cytosol
THAP12	1.06711e-06	-0.142064	0.318	0.417	0.0390573	regulation of transcription by RNA polymerase II; signal transduction; negative regulation of cell population proliferation	nucleic acid binding; metal ion binding; protein dimerization activity; DNA binding; protein binding; DNA-binding transcription factor activity, RNA polymerase II-specific	nuclear chromatin
HIST1H1D	1.07903e-06	-0.10186	0.07	0.131	0.0394937	nucleosome assembly; regulation of transcription, DNA-templated; negative regulation of DNA recombination; nucleosome positioning; chromosome condensation; negative regulation of chromatin silencing; negative regulation of transcription by RNA polymerase II; regulation of transcription by RNA polymerase II; histone H3-K4 trimethylation; histone H3-K27 trimethylation	RNA binding; DNA binding; chromatin DNA binding; double-stranded DNA binding; nucleosomal DNA binding	nucleus; nucleosome; nuclear chromatin; chromosome; nuclear euchromatin
RAB32	1.09421e-06	0.100268	0.136	0.08	0.040049	vesicle-mediated transport; intracellular protein transport; Rab protein signal transduction; mitochondrion organization; endosome to melanosome transport; protein localization to membrane; antigen processing and presentation; phagosome maturation; melanosome assembly	nucleotide binding; GTPase activity; GTP binding; protein binding; GTP-dependent protein binding; AP-1 adaptor complex binding; AP-3 adaptor complex binding; BLOC-2 complex binding	membrane; mitochondrion; Golgi apparatus; trans-Golgi network; vesicle; melanosome; cytoplasmic vesicle; mitochondrial outer membrane; endoplasmic reticulum; cytosol; phagocytic vesicle membrane; early endosome; phagocytic vesicle; melanosome membrane; mitochondria-associated endoplasmic reticulum membrane
MRPL52	1.09898e-06	-0.150111	0.637	0.714	0.0402237	translation; mitochondrial translation; mitochondrial translational elongation; mitochondrial translational termination	structural constituent of ribosome	mitochondrion; ribosome; mitochondrial large ribosomal subunit; mitochondrial inner membrane
NSMCE4A	1.11171e-06	-0.127086	0.25	0.341	0.0406895	DNA repair; DNA recombination; cellular response to DNA damage stimulus; positive regulation of response to DNA damage stimulus	protein binding	nucleus; nucleoplasm; chromosome; nuclear body; Smc5-Smc6 complex; chromosome, telomeric region
CUEDC2	1.12281e-06	-0.145045	0.57	0.656	0.0410958	negative regulation of macrophage cytokine production; negative regulation of cytokine production involved in inflammatory response	protein binding	nucleus; cytoplasm; cytosol; nucleoplasm; nuclear membrane
C15orf61	1.14336e-06	-0.125609	0.136	0.209	0.041848			extracellular region
NECAP2	1.16379e-06	-0.118386	0.15	0.225	0.042596	protein transport; endocytosis		membrane; plasma membrane; cytoplasmic vesicle; clathrin-coated pit; clathrin-coated vesicle membrane; intracellular; clathrin vesicle coat
BLOC1S1	1.1769e-06	-0.152579	0.591	0.686	0.0430758	endosomal transport; anterograde axonal transport; melanosome organization; anterograde synaptic vesicle transport; neuron projection development; lysosome localization; aerobic respiration; peptidyl-lysine acetylation; platelet dense granule organization	protein binding	cytoplasm; membrane; mitochondrion; mitochondrial matrix; lysosomal membrane; extracellular space; axon cytoplasm; cytosol; lysosome; BLOC-1 complex; mitochondrial intermembrane space; BORC complex
METRN	1.20063e-06	0.270693	0.674	0.638	0.0439444	signal transduction; multicellular organism development; cell differentiation; nervous system development; glial cell differentiation; positive regulation of axonogenesis	hormone activity	extracellular region; extracellular space
ATF4	1.23121e-06	0.176864	0.737	0.679	0.0450636	positive regulation of apoptotic process; regulation of transcription, DNA-templated; regulation of transcription by RNA polymerase II; rhythmic process; circadian regulation of gene expression; positive regulation of transcription, DNA-templated; gluconeogenesis; positive regulation of transcription by RNA polymerase II; transcription by RNA polymerase II; negative regulation of cold-induced the…	DNA binding; DNA-binding transcription factor activity; protein binding; DNA-binding transcription factor activity, RNA polymerase II-specific; RNA polymerase II regulatory region sequence-specific DNA binding; protein kinase binding; protein heterodimerization activity; RNA polymerase II distal enhancer sequence-specific DNA binding; transcription regulatory region DNA binding; RNA polymerase II…	nucleus; cytoplasm; membrane; plasma membrane; cytoskeleton; centrosome; microtubule organizing center; nuclear chromatin; nucleoplasm; protein-containing complex; neuron projection; ATF4-CREB1 transcription factor complex; ATF1-ATF4 transcription factor complex; nuclear periphery; Lewy body core; CHOP-ATF4 complex; transcription factor complex; dendrite membrane; RNA polymerase II transcription …
JMJD1C	1.24976e-06	0.165593	0.591	0.515	0.0457426	oxidation-reduction process; chromatin organization; regulation of transcription, DNA-templated; blood coagulation; histone H3-K9 demethylation	metal ion binding; oxidoreductase activity; protein binding; dioxygenase activity; histone demethylase activity (H3-K9 specific); chromatin DNA binding; transcription regulatory region sequence-specific DNA binding; thyroid hormone receptor binding	nucleus; nucleoplasm; chromatin
RRM1	1.25815e-06	-0.186094	0.425	0.513	0.0460495	oxidation-reduction process; metabolic process; DNA replication; deoxyribonucleotide biosynthetic process; nucleobase-containing small molecule interconversion; mitotic cell cycle; pyrimidine nucleobase metabolic process; male gonad development; response to ionizing radiation; cell proliferation in forebrain; protein heterotetramerization; retina development in camera-type eye	nucleotide binding; ATP binding; oxidoreductase activity; protein binding; catalytic activity; identical protein binding; ribonucleoside-diphosphate reductase activity, thioredoxin disulfide as acceptor; purine nucleotide binding; disordered domain specific binding	cytoplasm; cytosol; nuclear envelope; ribonucleoside-diphosphate reductase complex; cell projection; neuronal cell body; membrane; integral component of membrane
ACYP1	1.25974e-06	-0.14391	0.311	0.408	0.0461077	phosphate-containing compound metabolic process	hydrolase activity; acylphosphatase activity
PREX2	1.28582e-06	0.145213	0.271	0.194	0.0470624	intracellular signal transduction; regulation of Rho protein signal transduction; positive regulation of GTPase activity; G protein-coupled receptor signaling pathway; adult locomotory behavior; phosphatidylinositol 3-kinase signaling; dendrite morphogenesis	guanyl-nucleotide exchange factor activity; Rho guanyl-nucleotide exchange factor activity; Rac guanyl-nucleotide exchange factor activity; GTPase activator activity; protein binding	plasma membrane; cytosol
SUCLG1	1.28736e-06	0.278677	0.578	0.519	0.0471185	tricarboxylic acid cycle; nucleoside diphosphate phosphorylation; succinyl-CoA metabolic process; succinate metabolic process; nucleoside triphosphate biosynthetic process	RNA binding; nucleotide binding; catalytic activity; ligase activity; cofactor binding; succinate-CoA ligase activity; succinate-CoA ligase (ADP-forming) activity; succinate-CoA ligase (GDP-forming) activity; nucleoside diphosphate kinase activity	cytosol; mitochondrion; plasma membrane; mitochondrial matrix
GDF11	1.28761e-06	0.158661	0.32	0.243	0.047128	skeletal system development; metanephros development; ureteric bud development; negative regulation of cell population proliferation; animal organ morphogenesis; anterior/posterior pattern specification; spinal cord anterior/posterior patterning; pancreas development; negative regulation of cell differentiation; negative regulation of neuron differentiation; cell maturation; camera-type eye morph…	growth factor activity; cytokine activity; protein binding; transforming growth factor beta receptor binding	intracellular membrane-bounded organelle; nucleoplasm; extracellular space; extracellular region; protein-containing complex
GADD45G	1.31171e-06	-0.145396	0.09	0.156	0.0480099	apoptotic process; multicellular organism development; cell differentiation; regulation of cell cycle; positive regulation of apoptotic process; positive regulation of cold-induced thermogenesis; positive regulation of JNK cascade; positive regulation of p38MAPK cascade; activation of MAPKKK activity	protein binding	nucleus; cytoplasm
PACC1	1.3146e-06	-0.139723	0.203	0.284	0.0481159	ion transmembrane transport; ion transport; chloride transport; chloride transmembrane transport	protein binding; chloride channel activity; pH-gated chloride channel activity	membrane; integral component of membrane; plasma membrane; chloride channel complex; cell surface; integral component of plasma membrane
H2AFZ	1.31612e-06	-0.115313	0.957	0.966	0.0481711	chromatin organization; positive regulation of transcription by RNA polymerase II; cellular response to estradiol stimulus	DNA binding; protein heterodimerization activity; chromatin DNA binding; protein binding; RNA polymerase II distal enhancer sequence-specific DNA binding; RNA polymerase II proximal promoter sequence-specific DNA binding; RNA polymerase II core promoter sequence-specific DNA binding; nucleosomal DNA binding	nucleus; nucleosome; chromosome; nuclear chromatin; extracellular exosome; nuclear euchromatin; nuclear heterochromatin
YWHAQ	1.3239e-06	-0.155969	0.903	0.942	0.0484562	substantia nigra development; membrane organization; negative regulation of transcription, DNA-templated; positive regulation of protein insertion into mitochondrial membrane involved in apoptotic signaling pathway; protein targeting; small GTPase mediated signal transduction; negative regulation of ion transmembrane transport	protein domain specific binding; protein binding; identical protein binding; protein N-terminus binding; protein C-terminus binding; ion channel binding; 14-3-3 protein binding	cytoplasm; mitochondrion; membrane; focal adhesion; cytosol; extracellular exosome; protein-containing complex; synapse
DEGS1	1.34308e-06	-0.148779	0.405	0.5	0.0491581	lipid metabolic process; oxidation-reduction process; sphingolipid biosynthetic process; fatty acid metabolic process; fatty acid biosynthetic process; electron transport chain; neutrophil degranulation; unsaturated fatty acid biosynthetic process; ceramide biosynthetic process	sphingolipid delta-4 desaturase activity; oxidoreductase activity; electron transfer activity	membrane; integral component of membrane; endoplasmic reticulum; endoplasmic reticulum membrane; mitochondrion; plasma membrane; specific granule membrane; integral component of plasma membrane
NOS1AP	1.34501e-06	0.157949	0.281	0.204	0.0492285	positive regulation of gene expression; positive regulation of voltage-gated potassium channel activity involved in ventricular cardiac muscle cell action potential repolarization; regulation of calcium ion transmembrane transport via high voltage-gated calcium channel; regulation of ventricular cardiac muscle cell membrane repolarization; positive regulation of nitric-oxide synthase activity; po…	protein binding; nitric-oxide synthase binding	perinuclear region of cytoplasm; nucleus; cytosol; sarcolemma; glutamatergic synapse; Z disc; sarcoplasmic reticulum membrane; mitochondrion; caveola; T-tubule; nuclear membrane; inward rectifier potassium channel complex; L-type voltage-gated calcium channel complex
UCHL1	1.35042e-06	-0.155022	0.777	0.835	0.0494265	protein deubiquitination; proteolysis; ubiquitin-dependent protein catabolic process; negative regulation of MAP kinase activity; regulation of macroautophagy; proteasome-mediated ubiquitin-dependent protein catabolic process; response to ischemia; axonogenesis; axon target recognition; adult walking behavior; cell population proliferation; sensory perception of pain; axonal transport of mitochon…	thiol-dependent ubiquitin-specific protease activity; hydrolase activity; ligase activity; peptidase activity; cysteine-type peptidase activity; thiol-dependent ubiquitinyl hydrolase activity; protein binding; ubiquitin binding; ubiquitin protein ligase binding; cysteine-type endopeptidase activity; alpha-2A adrenergic receptor binding; omega peptidase activity	intracellular; cytoplasm; membrane; cytosol; nucleoplasm; endoplasmic reticulum; endoplasmic reticulum membrane; axon cytoplasm; plasma membrane; axon; neuronal cell body; neuron projection terminus
PSMB6	1.38571e-06	-0.166277	0.793	0.838	0.0507183	proteolysis; proteolysis involved in cellular protein catabolic process; Fc-epsilon receptor signaling pathway; T cell receptor signaling pathway; MAPK cascade; protein polyubiquitination; stimulatory C-type lectin receptor signaling pathway; antigen processing and presentation of exogenous peptide antigen via MHC class I, TAP-dependent; regulation of cellular amino acid metabolic process; protea…	hydrolase activity; protein binding; peptidase activity; endopeptidase activity; threonine-type endopeptidase activity; cadherin binding	nucleus; cytoplasm; cytosol; nucleoplasm; proteasome complex; proteasome core complex; extracellular exosome; proteasome core complex, beta-subunit complex
CHML	1.3907e-06	-0.16059	0.306	0.395	0.0509009	intracellular protein transport; small GTPase mediated signal transduction; regulation of catalytic activity; positive regulation of GTPase activity; vesicle-mediated transport; protein geranylgeranylation; post-translational protein modification; G protein-coupled receptor signaling pathway	GTPase activator activity; Rab GTPase binding; GDP-dissociation inhibitor activity; G protein-coupled receptor activity	cytoplasm; nucleus; cytosol; nucleoplasm; Rab-protein geranylgeranyltransferase complex; membrane; integral component of membrane
TUSC3	1.42873e-06	0.153774	0.539	0.468	0.0522929	magnesium ion transmembrane transport; protein glycosylation; protein N-linked glycosylation via asparagine; transmembrane transport; protein N-linked glycosylation; cognition; magnesium ion transport	dolichyl-diphosphooligosaccharide-protein glycotransferase activity; magnesium ion transmembrane transporter activity	membrane; integral component of membrane; endoplasmic reticulum; endoplasmic reticulum membrane; mitochondrion; plasma membrane; integral component of plasma membrane; oligosaccharyltransferase complex
SYNCRIP	1.43433e-06	-0.159235	0.658	0.741	0.0524979	mRNA processing; RNA splicing; mRNA splicing, via spliceosome; regulation of translation; cellular response to interferon-gamma; viral process; negative regulation of translation; RNA processing; osteoblast differentiation; CRD-mediated mRNA stabilization	nucleic acid binding; RNA binding; protein binding; mRNA binding; mRNA 5'-UTR binding; poly(A) binding	nucleus; cytoplasm; membrane; endoplasmic reticulum; intracellular membrane-bounded organelle; spliceosomal complex; nucleoplasm; catalytic step 2 spliceosome; ribonucleoprotein complex; CRD-mediated mRNA stability complex; histone pre-mRNA 3'end processing complex; GAIT complex
TNFRSF1A	1.4647e-06	0.109621	0.116	0.065	0.0536096	negative regulation of inflammatory response; positive regulation of tyrosine phosphorylation of STAT protein; positive regulation of transcription by RNA polymerase II; tumor necrosis factor-mediated signaling pathway; signal transduction; apoptotic process; inflammatory response; positive regulation of inflammatory response; viral process; positive regulation of I-kappaB kinase/NF-kappaB signal…	protein binding; tumor necrosis factor-activated receptor activity; tumor necrosis factor binding	extracellular space; membrane; integral component of membrane; Golgi apparatus; plasma membrane; extracellular region; Golgi membrane; mitochondrion; receptor complex; integral component of plasma membrane; membrane raft; tumor necrosis factor receptor superfamily complex; cell surface
AP1S1	1.47956e-06	-0.133107	0.414	0.498	0.0541534	intracellular protein transport; protein transport; vesicle-mediated transport; retrograde transport, endosome to Golgi; response to virus; antigen processing and presentation of exogenous peptide antigen via MHC class II; regulation of defense response to virus by virus; receptor-mediated endocytosis		membrane; Golgi apparatus; cytosol; membrane coat; terminal bouton; intracellular membrane-bounded organelle; cytoplasmic vesicle; cytoplasmic vesicle membrane; clathrin-coated pit; trans-Golgi network membrane; Golgi membrane; lysosomal membrane; AP-1 adaptor complex
SRSF7	1.48188e-06	-0.186175	0.804	0.855	0.0542382	mRNA processing; RNA splicing; mRNA transport; regulation of alternative mRNA splicing, via spliceosome; mRNA export from nucleus; RNA export from nucleus; mRNA 3'-end processing; negative regulation of mRNA splicing, via spliceosome; mRNA splicing, via spliceosome; mRNA cis splicing, via spliceosome; cellular response to leukemia inhibitory factor	nucleic acid binding; RNA binding; zinc ion binding; metal ion binding; protein binding; protein domain specific binding	nucleus; cytoplasm; nucleoplasm; extracellular exosome; nuclear speck
SPIN1	1.58764e-06	-0.132764	0.284	0.376	0.0581091	chromatin organization; cell cycle; gamete generation; multicellular organism development; Wnt signaling pathway; meiotic cell cycle; positive regulation of Wnt signaling pathway; positive regulation of transcription, DNA-templated; rRNA transcription	protein binding; methylated histone binding	nucleus; cytosol; nucleoplasm; nuclear membrane; spindle; nucleolus
NAP1L4	1.58905e-06	-0.149421	0.57	0.66	0.058161	nucleosome assembly	RNA binding; protein binding; unfolded protein binding; nucleosome binding	nucleus; cytoplasm
ARL6IP5	1.59769e-06	-0.187514	0.645	0.714	0.058477	negative regulation of L-glutamate import across plasma membrane; L-glutamate transmembrane transport; positive regulation of apoptotic process; positive regulation of stress-activated MAPK cascade; positive regulation of cysteine-type endopeptidase activity involved in apoptotic process; intrinsic apoptotic signaling pathway in response to oxidative stress; negative regulation of mitochondrial m…	protein binding	cytoplasm; membrane; integral component of membrane; endoplasmic reticulum; endoplasmic reticulum membrane; plasma membrane; cytoskeleton
C12orf75	1.60472e-06	0.173068	0.443	0.363	0.0587344
GYG1	1.60866e-06	0.128393	0.218	0.149	0.0588787	neutrophil degranulation; glycogen biosynthetic process	metal ion binding; transferase activity; protein homodimerization activity; protein binding; transferase activity, transferring glycosyl groups; manganese ion binding; glycogenin glucosyltransferase activity; UDP-alpha-D-glucose:glucosyl-glycogenin alpha-D-glucosyltransferase activity	membrane; extracellular region; cytosol; secretory granule lumen; ficolin-1-rich granule lumen; lysosomal lumen
SPEN	1.62924e-06	-0.180812	0.443	0.528	0.059632	Notch signaling pathway; viral process; negative regulation of transcription by RNA polymerase II; negative regulation of transcription, DNA-templated; positive regulation of neurogenesis	nucleic acid binding; RNA binding; DNA binding; protein binding; RNA polymerase II transcription factor binding; transcription corepressor activity	nucleus; nucleoplasm; extracellular exosome; transcriptional repressor complex
NEGR1	1.63715e-06	0.115909	0.19	0.124	0.0599213	cell adhesion; locomotory behavior; feeding behavior; positive regulation of neuron projection development; cell-cell adhesion	protein binding	membrane; plasma membrane; extracellular region; anchored component of membrane
ZNRF1	1.69301e-06	-0.116561	0.179	0.256	0.061966	protein ubiquitination; protein K48-linked ubiquitination; protein polyubiquitination; proteasome-mediated ubiquitin-dependent protein catabolic process	metal ion binding; transferase activity; protein binding; ubiquitin-protein transferase activity; ubiquitin protein ligase activity	membrane; cell junction; cytoplasmic vesicle; synapse; lysosome; endosome; cytosol; synaptic vesicle membrane
GAP43	1.76419e-06	-0.152183	0.324	0.419	0.064571	multicellular organism development; regulation of growth; cell differentiation; nervous system development; response to wounding; regulation of filopodium assembly; protein kinase C-activating G protein-coupled receptor signaling pathway; axon choice point recognition; axon regeneration; tissue regeneration; axon guidance; glial cell differentiation; cell fate commitment; regulation of postsynapt…	protein binding; calmodulin binding; phosphatidylserine binding; lysophosphatidic acid binding; phosphatidylinositol phosphate binding	cytoplasm; membrane; plasma membrane; cell projection; cell junction; synapse; dendrite; axon; perikaryon; postsynaptic density; filopodium membrane; growth cone membrane; cell periphery; GABA-ergic synapse
IP6K2	1.84973e-06	-0.129359	0.491	0.587	0.067702	phosphorylation; lipid metabolic process; inositol phosphate biosynthetic process; phosphatidylinositol metabolic process; positive regulation of apoptotic process; phosphate ion transport; negative regulation of cell growth; inositol phosphate metabolic process; type I interferon signaling pathway; phosphatidylinositol phosphorylation; cellular response to flavonoid	nucleotide binding; ATP binding; kinase activity; transferase activity; protein binding; inositol hexakisphosphate 5-kinase activity; flavonoid binding; inositol hexakisphosphate kinase activity	nucleus; fibrillar center; cell junction; nucleoplasm
GTF2I	1.87934e-06	-0.159599	0.841	0.875	0.0687858	transcription by RNA polymerase II; regulation of transcription, DNA-templated; signal transduction; transcription initiation from RNA polymerase II promoter; negative regulation of angiogenesis; negative regulation of cytosolic calcium ion concentration	DNA binding; DNA-binding transcription factor activity; protein binding	nucleus; cytoplasm; membrane; nucleoplasm
DAAM1	1.94846e-06	0.183146	0.663	0.593	0.0713157	actin cytoskeleton organization; Wnt signaling pathway; cellular component organization; Wnt signaling pathway, planar cell polarity pathway	actin binding; protein binding; identical protein binding; Rho GTPase binding	cytoplasm; membrane; cytosol; motile cilium; plasma membrane; cytoskeleton; cell projection; ciliary basal body; stress fiber
PELI2	1.9848e-06	-0.127693	0.132	0.203	0.0726458	protein polyubiquitination; regulation of Toll signaling pathway; protein ubiquitination; interleukin-1-mediated signaling pathway; Toll signaling pathway; positive regulation of I-kappaB kinase/NF-kappaB signaling; positive regulation of MAPK cascade; positive regulation of protein phosphorylation	ubiquitin protein ligase activity; transferase activity; protein binding; ubiquitin-ubiquitin ligase activity	cytosol
NAPRT	1.98751e-06	-0.12113	0.195	0.274	0.0727447	NAD biosynthetic process; pyridine nucleotide biosynthetic process; nicotinate nucleotide salvage; neutrophil degranulation; response to oxidative stress; NAD biosynthesis via nicotinamide riboside salvage pathway; NAD salvage	nicotinate-nucleotide diphosphorylase (carboxylating) activity; transferase activity; catalytic activity; transferase activity, transferring glycosyl groups; ligase activity; nicotinate phosphoribosyltransferase activity; metal ion binding; protein binding	cytoplasm; cytosol; extracellular region; extracellular exosome; azurophil granule lumen
CYP51A1	2.01916e-06	-0.207237	0.714	0.77	0.0739031	oxidation-reduction process; cholesterol biosynthetic process via 24,25-dihydrolanosterol; negative regulation of protein catabolic process; negative regulation of protein secretion; demethylation; negative regulation of amyloid-beta clearance; lipid metabolic process; steroid biosynthetic process; steroid metabolic process; sterol biosynthetic process; cholesterol metabolic process; cholesterol …	metal ion binding; monooxygenase activity; oxidoreductase activity; iron ion binding; oxidoreductase activity, acting on paired donors, with incorporation or reduction of molecular oxygen; heme binding; sterol 14-demethylase activity	membrane; integral component of membrane; endoplasmic reticulum; intracellular membrane-bounded organelle; endoplasmic reticulum membrane; organelle membrane; plasma membrane
WBP4	2.04825e-06	-0.185763	0.483	0.561	0.0749681	mRNA processing; RNA splicing; mRNA splicing, via spliceosome; mRNA cis splicing, via spliceosome	nucleic acid binding; zinc ion binding; metal ion binding; protein binding; proline-rich region binding	nucleus; nuclear speck; spliceosomal complex; nucleoplasm; U2-type precatalytic spliceosome
EIF3L	2.07789e-06	0.158557	0.849	0.836	0.0760528	formation of cytoplasmic translation initiation complex; cytoplasmic translational initiation; translation; translational initiation; viral translational termination-reinitiation	translation initiation factor activity; protein binding; RNA binding	cytoplasm; eukaryotic translation initiation factor 3 complex; eukaryotic 43S preinitiation complex; eukaryotic 48S preinitiation complex; membrane; cytosol
ITM2C	2.11872e-06	0.183708	0.594	0.525	0.0775471	positive regulation of extrinsic apoptotic signaling pathway; neuron differentiation; negative regulation of neuron projection development; negative regulation of amyloid precursor protein biosynthetic process	ATP binding; protein binding; amyloid-beta binding	membrane; integral component of membrane; lysosomal membrane; plasma membrane; perinuclear region of cytoplasm; lysosome; Golgi apparatus; extracellular exosome
HMGB3	2.12209e-06	-0.176982	0.576	0.654	0.0776705	DNA recombination; immune system process; innate immune response; DNA geometric change; regulation of transcription by RNA polymerase II; positive regulation of transcription by RNA polymerase II; multicellular organism development; positive regulation of innate immune response; negative regulation of B cell differentiation; negative regulation of myeloid cell differentiation	DNA binding; RNA binding; protein binding; four-way junction DNA binding; DNA binding, bending; transcription factor binding; double-stranded DNA binding	nucleus; cytoplasm; chromosome; nuclear chromatin
DBI	2.18039e-06	-0.130149	0.756	0.822	0.0798045	acyl-CoA metabolic process; phosphatidylcholine acyl-chain remodeling	fatty-acyl-CoA binding; lipid binding; protein dimerization activity; benzodiazepine receptor binding; long-chain fatty acyl-CoA binding	endoplasmic reticulum; Golgi apparatus; extracellular exosome; endoplasmic reticulum lumen
ATP6V1A	2.19888e-06	0.131824	0.238	0.167	0.0804811	proton transmembrane transport; ion transport; cellular iron ion homeostasis; ATP metabolic process; ion transmembrane transport; insulin receptor signaling pathway; regulation of macroautophagy; transferrin transport; phagosome acidification; cellular response to increased oxygen levels	nucleotide binding; ATP binding; proton-transporting ATPase activity, rotational mechanism	cytoplasm; lysosomal membrane; cytosol; plasma membrane; proton-transporting V-type ATPase, V1 domain; extracellular exosome; vacuolar membrane; proton-transporting two-sector ATPase complex; microvillus; apical plasma membrane
GBE1	2.22627e-06	0.102525	0.136	0.081	0.0814837	carbohydrate metabolic process; glycogen biosynthetic process; generation of precursor metabolites and energy; glycogen metabolic process	transferase activity; catalytic activity; transferase activity, transferring glycosyl groups; hydrolase activity, hydrolyzing O-glycosyl compounds; cation binding; 1,4-alpha-glucan branching enzyme activity; protein binding; 1,4-alpha-glucan branching enzyme activity (using a glucosylated glycogenin as primer for glycogen synthesis)	cytosol; extracellular exosome
TMF1	2.38284e-06	0.199134	0.52	0.46	0.0872142	transcription by RNA polymerase II; regulation of proteasomal protein catabolic process; regulation of transcription, DNA-templated; acrosome assembly; positive regulation of cytokine production; spermatid development; spermatid nucleus differentiation; male gonad development; negative regulation of gene expression; flagellated sperm motility; luteinizing hormone secretion; Leydig cell differenti…	DNA binding; protein binding; transcription coregulator activity	nucleus; cytoplasm; membrane; Golgi apparatus; Golgi membrane; endoplasmic reticulum; cytosol
PDCD5	2.40143e-06	-0.130561	0.81	0.859	0.0878947	apoptotic process; positive regulation of gene expression; negative regulation of cell population proliferation; cellular response to transforming growth factor beta stimulus; positive regulation of release of cytochrome c from mitochondria; positive regulation of cysteine-type endopeptidase activity involved in apoptotic process; positive regulation of apoptotic process; positive regulation of p…	DNA binding; protein binding; heparin binding; acetyltransferase activator activity; beta-tubulin binding	nucleus; cytoplasm; cytosol; extracellular exosome
FARSA	2.4227e-06	-0.124712	0.173	0.25	0.0886731	tRNA aminoacylation; phenylalanyl-tRNA aminoacylation; translation; tRNA aminoacylation for protein translation; protein heterotetramerization	ATP binding; nucleotide binding; phenylalanine-tRNA ligase activity; aminoacyl-tRNA ligase activity; tRNA binding; RNA binding; ligase activity; protein binding	cytoplasm; membrane; cytosol; phenylalanine-tRNA ligase complex
HP1BP3	2.42543e-06	-0.16652	0.705	0.789	0.088773	regulation of transcription, DNA-templated; nucleosome assembly; heterochromatin organization; regulation of cell population proliferation; cellular response to hypoxia; regulation of nucleus size	DNA binding; protein binding; chromatin binding; nucleosome binding	nucleus; nuclear speck; nucleosome; chromosome
CSTB	2.50163e-06	-0.146079	0.813	0.852	0.0915621	negative regulation of endopeptidase activity; negative regulation of peptidase activity; neutrophil degranulation; negative regulation of proteolysis; adult locomotory behavior	endopeptidase inhibitor activity; RNA binding; cysteine-type endopeptidase inhibitor activity; peptidase inhibitor activity; protease binding	intracellular; nucleus; cytoplasm; nucleolus; cytosol; extracellular space; extracellular region; extracellular exosome; collagen-containing extracellular matrix; secretory granule lumen; ficolin-1-rich granule lumen; tertiary granule lumen
SDCBP	2.67215e-06	0.157876	0.873	0.84	0.0978035	intracellular signal transduction; actin cytoskeleton organization; chemical synaptic transmission; substrate-dependent cell migration, cell extension; positive regulation of cell migration; neutrophil degranulation; regulation of mitotic cell cycle; positive regulation of cell population proliferation; negative regulation of proteasomal ubiquitin-dependent protein catabolic process; positive reg…	protein binding; lipid binding; identical protein binding; phosphatidylinositol-4,5-bisphosphate binding; protein N-terminus binding; protein heterodimerization activity; frizzled binding; interleukin-5 receptor binding; cytoskeletal adaptor activity; syndecan binding; protein C-terminus binding; growth factor binding; neurexin family protein binding; protein homodimerization activity; ephrin rec…	cytoplasm; nucleus; membrane; integral component of membrane; intracellular membrane-bounded organelle; cytosol; nucleoplasm; endoplasmic reticulum; endoplasmic reticulum membrane; nuclear membrane; extracellular space; plasma membrane; cytoskeleton; extracellular region; melanosome; cell junction; membrane raft; focal adhesion; extracellular exosome; blood microparticle; adherens junction; inter…
LIPG	2.69977e-06	-0.119017	0.15	0.228	0.0988143	lipid metabolic process; cholesterol homeostasis; positive regulation of high-density lipoprotein particle clearance; lipid catabolic process; response to nutrient; cell population proliferation; regulation of lipoprotein metabolic process; high-density lipoprotein particle remodeling; reverse cholesterol transport; phospholipid homeostasis; phospholipid catabolic process; positive regulation of …	lipoprotein lipase activity; carboxylic ester hydrolase activity; metal ion binding; hydrolase activity; phospholipase activity; triglyceride lipase activity; heparin binding; lipase activity; phospholipase A1 activity; protein binding	extracellular region; extracellular space; Golgi apparatus; cell surface; early endosome
MCM4	2.70883e-06	-0.165209	0.323	0.41	0.099146	DNA duplex unwinding; DNA replication initiation; DNA replication; cell cycle; G1/S transition of mitotic cell cycle; double-strand break repair via break-induced replication; DNA unwinding involved in DNA replication; mitotic DNA replication initiation; pre-replicative complex assembly involved in nuclear cell cycle DNA replication; DNA strand elongation involved in DNA replication	nucleotide binding; ATP binding; hydrolase activity; DNA binding; DNA helicase activity; helicase activity; protein binding; single-stranded DNA binding; DNA replication origin binding	nucleus; MCM complex; membrane; nucleoplasm; nuclear chromosome, telomeric region
HADHB	2.73672e-06	0.1815	0.55	0.474	0.100167	lipid metabolic process; fatty acid metabolic process; fatty acid beta-oxidation; cardiolipin acyl-chain remodeling	catalytic activity; transferase activity, transferring acyl groups other than amino-acyl groups; RNA binding; transferase activity; transferase activity, transferring acyl groups; protein binding; acetyl-CoA C-acyltransferase activity; enoyl-CoA hydratase activity; 3-hydroxyacyl-CoA dehydrogenase activity; long-chain-3-hydroxyacyl-CoA dehydrogenase activity; long-chain-enoyl-CoA hydratase activit…	mitochondrion; membrane; endoplasmic reticulum; mitochondrial inner membrane; mitochondrial outer membrane; mitochondrial nucleoid; mitochondrial envelope
RCOR1	2.80409e-06	-0.124301	0.216	0.297	0.102632	chromatin organization; negative regulation of transcription by RNA polymerase II; regulation of transcription by RNA polymerase II; viral process; negative regulation of transcription, DNA-templated; blood coagulation; histone H4 deacetylation	DNA binding; protein binding; DNA-binding transcription factor activity; DNA-binding transcription factor activity, RNA polymerase II-specific; transcription factor binding; transcription corepressor activity; transcription regulatory region DNA binding; DNA-binding transcription repressor activity, RNA polymerase II-specific	nucleus; transcription factor complex; nucleoplasm; transcriptional repressor complex; DNA repair complex
ELOVL6	2.85218e-06	-0.143395	0.302	0.388	0.104393	lipid metabolic process; fatty acid metabolic process; fatty acid biosynthetic process; unsaturated fatty acid biosynthetic process; fatty acid elongation, saturated fatty acid; very long-chain fatty acid biosynthetic process; fatty acid elongation, monounsaturated fatty acid; long-chain fatty-acyl-CoA biosynthetic process; fatty acid elongation; positive regulation of cold-induced thermogenesis;…	transferase activity; fatty acid elongase activity; 3-oxo-arachidoyl-CoA synthase activity; 3-oxo-cerotoyl-CoA synthase activity; 3-oxo-lignoceronyl-CoA synthase activity; very-long-chain 3-ketoacyl-CoA synthase activity; transferase activity, transferring acyl groups other than amino-acyl groups; protein binding	membrane; integral component of membrane; endoplasmic reticulum; endoplasmic reticulum membrane; integral component of endoplasmic reticulum membrane
ASAH1	3.01422e-06	0.151579	0.432	0.359	0.110323	lipid metabolic process; sphingolipid metabolic process; glycosphingolipid metabolic process; cellular response to tumor necrosis factor; neutrophil degranulation; keratinocyte differentiation; ceramide biosynthetic process; regulation of steroid biosynthetic process; sphingosine biosynthetic process; ceramide catabolic process; regulation of programmed necrotic cell death	hydrolase activity; N-acylsphingosine amidohydrolase activity; ceramidase activity; hydrolase activity, acting on carbon-nitrogen (but not peptide) bonds, in linear amides; hydrolase activity, acting on carbon-nitrogen (but not peptide) bonds	nucleus; cytoplasm; extracellular space; lysosome; extracellular region; extracellular exosome; ficolin-1-rich granule lumen; tertiary granule lumen; lysosomal lumen; membrane; integral component of membrane
GSTA4	3.05058e-06	-0.117204	0.479	0.577	0.111654	xenobiotic metabolic process; glutathione metabolic process; glutathione derivative biosynthetic process	transferase activity; protein homodimerization activity; protein binding; glutathione transferase activity; identical protein binding	cytoplasm; cytosol
MTRNR2L8	3.0604e-06	0.165517	0.235	0.167	0.112014	negative regulation of signaling receptor activity; negative regulation of execution phase of apoptosis	receptor antagonist activity	cytoplasm; extracellular region
RHEB	3.14357e-06	0.170403	0.83	0.827	0.115058	signal transduction; positive regulation of TOR signaling; regulation of TOR signaling; positive regulation of oligodendrocyte differentiation; negative regulation of cold-induced thermogenesis; small GTPase mediated signal transduction; cell cycle arrest; regulation of macroautophagy; regulation of type B pancreatic cell development	metal ion binding; nucleotide binding; GTPase activity; GTP binding; protein binding; protein kinase binding; GDP binding; magnesium ion binding	cytoplasm; membrane; endoplasmic reticulum; endoplasmic reticulum membrane; Golgi apparatus; cytosol; Golgi membrane; spliceosomal complex; plasma membrane; extracellular exosome; endomembrane system; lysosomal membrane; postsynaptic density
WDR3	3.14876e-06	-0.128965	0.223	0.306	0.115248	rRNA processing	RNA binding; protein binding	nucleus; nucleolus; nuclear membrane; small-subunit processome; Pwp2p-containing subcomplex of 90S preribosome; nucleoplasm
PNRC2	3.22781e-06	-0.132196	0.473	0.567	0.118141	nuclear-transcribed mRNA catabolic process, nonsense-mediated decay; deadenylation-independent decapping of nuclear-transcribed mRNA	protein binding	nucleus; cytoplasm; Golgi apparatus; nucleoplasm; P-body; cytosol
DYNLT1	3.2401e-06	-0.126523	0.749	0.815	0.118591	cell division; cell cycle; nervous system development; viral process; neutrophil degranulation; viral entry into host cell; establishment of mitotic spindle orientation; regulation of G protein-coupled receptor signaling pathway; negative regulation of neurogenesis; positive regulation of neuron projection development; dendrite development; intracellular transport of viral protein in host cell; p…	motor activity; protein binding; identical protein binding; protein C-terminus binding	mitochondrion; cytoplasm; Golgi apparatus; cytoskeleton; microtubule; spindle; extracellular region; cytoplasmic dynein complex; dynein complex; host cell; cytoplasmic microtubule; secretory granule lumen; ficolin-1-rich granule lumen; secretory vesicle; lamellipodium; neuronal cell body; axonal growth cone
[truncated: 570 more rows]
