# Supplementary material for: FGF8-mediated gene regulation affects regional identity in human cerebral organoids
Source: eLife. 2024 Nov 1;13:e98096. doi: 10.7554/eLife.98096 (PMC11581432; doi:10.7554/eLife.98096)
Supplement: Figure 6—source data 3. — Excel file listing genes with differential expression between WNTi and WNTi + FGF8 organoids in cluster 3 (glutamatergic early differentiating neurons), visualized as a volcano plot in Figure 6D. [file elife-98096-fig6-data3.xlsx]

## Sheet: S21306_FGF8vsCTL_cls3
Gene name	p_val	avg_log2FC	pct.1	pct.2	p_val_adj	GO:biological proces	GO:molecular function	GO:cellular component
ETV1	5.78952e-119	1.61484	0.534	0.03	2.11902e-114	regulation of transcription, DNA-templated; transcription by RNA polymerase II; cell differentiation; regulation of transcription by RNA polymerase II; positive regulation of transcription by RNA polymerase II; peripheral nervous system neuron development; axon guidance; muscle organ development; mechanosensory behavior; positive regulation of transcription, DNA-templated	DNA binding; DNA-binding transcription factor activity; sequence-specific DNA binding; protein binding; DNA-binding transcription factor activity, RNA polymerase II-specific; RNA polymerase II proximal promoter sequence-specific DNA binding; DNA-binding transcription activator activity, RNA polymerase II-specific	nucleus; nuclear chromatin
NR2F1	7.61685e-73	-1.44562	0.174	0.766	2.78784e-68	regulation of transcription, DNA-templated; intracellular receptor signaling pathway; steroid hormone mediated signaling pathway; cell differentiation; regulation of transcription by RNA polymerase II; negative regulation of transcription by RNA polymerase II; positive regulation of transcription by RNA polymerase II; anatomical structure development; signal transduction; transcription initiation…	zinc ion binding; metal ion binding; DNA binding; DNA-binding transcription factor activity; sequence-specific DNA binding; steroid hormone receptor activity; RNA polymerase II regulatory region sequence-specific DNA binding; protein binding; DNA-binding transcription factor activity, RNA polymerase II-specific; RNA polymerase II proximal promoter sequence-specific DNA binding; DNA-binding transc…	nucleus; cytosol; nucleoplasm
EFNA5	1.21551e-47	0.51796	0.287	0.03	4.44889e-43	positive regulation of protein phosphorylation; multicellular organism development; cell differentiation; ephrin receptor signaling pathway; nervous system development; axon guidance; regulation of microtubule cytoskeleton organization; regulation of actin cytoskeleton organization; activation of transmembrane receptor protein tyrosine kinase activity; regulation of GTPase activity; positive regu…	protein binding; ephrin receptor binding; transmembrane receptor protein tyrosine kinase activator activity; neurotrophin TRKA receptor binding; neurotrophin TRKB receptor binding; neurotrophin TRKC receptor binding; chemorepellent activity	membrane; plasma membrane; caveola; anchored component of membrane; anchored component of external side of plasma membrane; basement membrane; adherens junction; cell periphery; GABA-ergic synapse; integral component of membrane
ZIC1	1.869e-47	0.438699	0.22	0.009	6.84074e-43	multicellular organism development; cell differentiation; positive regulation of transcription, DNA-templated; nervous system development; positive regulation of protein import into nucleus; central nervous system development; brain development; pattern specification process; inner ear morphogenesis; regulation of smoothened signaling pathway; adult walking behavior; spinal cord development; posi…	nucleic acid binding; metal ion binding; DNA binding; DNA-binding transcription factor activity; DNA-binding transcription factor activity, RNA polymerase II-specific; RNA polymerase II regulatory region sequence-specific DNA binding; RNA polymerase II proximal promoter sequence-specific DNA binding; DNA-binding transcription activator activity, RNA polymerase II-specific	nucleus; cytoplasm
NFIB	1.27172e-45	-1.06613	0.686	0.912	4.65461e-41	regulation of transcription, DNA-templated; DNA replication; positive regulation of transcription, DNA-templated; positive regulation of transcription by RNA polymerase II; negative regulation of transcription by RNA polymerase II; brain development; chondrocyte differentiation; glial cell differentiation; principal sensory nucleus of trigeminal nerve development; anterior commissure morphogenesi…	DNA binding; DNA-binding transcription factor activity; DNA-binding transcription factor activity, RNA polymerase II-specific; RNA polymerase II proximal promoter sequence-specific DNA binding; DNA-binding transcription activator activity, RNA polymerase II-specific; double-stranded DNA binding	nucleus; fibrillar center; nuclear chromatin; cerebellar mossy fiber; intracellular
FOXP2	6.27363e-33	0.449474	0.25	0.04	2.29621e-28	regulation of transcription, DNA-templated; negative regulation of transcription, DNA-templated; caudate nucleus development; putamen development; cerebral cortex development; negative regulation of transcription by RNA polymerase II; positive regulation of mesenchymal cell proliferation; skeletal muscle tissue development; post-embryonic development; cerebellum development; lung development; for…	DNA binding; DNA-binding transcription factor activity; sequence-specific DNA binding; metal ion binding; protein homodimerization activity; protein binding; identical protein binding; DNA-binding transcription factor activity, RNA polymerase II-specific; RNA polymerase II proximal promoter sequence-specific DNA binding; DNA-binding transcription repressor activity, RNA polymerase II-specific; pr…	nucleus; nuclear chromatin
SSTR2	1.25816e-30	-0.887611	0.308	0.656	4.60499e-26	G protein-coupled receptor signaling pathway; signal transduction; negative regulation of cell population proliferation; neuropeptide signaling pathway; G protein-coupled receptor signaling pathway, coupled to cyclic nucleotide second messenger; cellular response to glucocorticoid stimulus; somatostatin signaling pathway; cellular response to estradiol stimulus; regulation of muscle contraction; …	G protein-coupled receptor activity; protein binding; PDZ domain binding; peptide binding; somatostatin receptor activity; neuropeptide binding	cytoplasm; membrane; integral component of membrane; cytosol; plasma membrane; integral component of plasma membrane
CRABP1	6.90118e-30	-1.0981	0.326	0.668	2.5259e-25	retinoic acid catabolic process; signal transduction; multicellular organism development	protein binding; lipid binding; retinoic acid binding; retinal binding; retinol binding; retinoid binding	cytoplasm; cytosol
NR2F2	9.94738e-30	-0.843009	0.134	0.492	3.64084e-25	negative regulation of endothelial cell proliferation; negative regulation of endothelial cell migration; positive regulation of transcription, DNA-templated; regulation of transcription, DNA-templated; intracellular receptor signaling pathway; steroid hormone mediated signaling pathway; cell differentiation; regulation of transcription by RNA polymerase II; negative regulation of transcription b…	zinc ion binding; metal ion binding; DNA binding; DNA-binding transcription factor activity; protein homodimerization activity; sequence-specific DNA binding; protein binding; steroid hormone receptor activity; RNA polymerase II regulatory region sequence-specific DNA binding; DNA-binding transcription factor activity, RNA polymerase II-specific; transcription corepressor activity; nuclear recept…	nucleus; cytosol; nucleoplasm
ZIC3	1.28916e-29	0.261264	0.146	0.008	4.71847e-25	multicellular organism development; cell differentiation; positive regulation of transcription, DNA-templated; nervous system development; positive regulation of transcription by RNA polymerase II; central nervous system development; heart looping; determination of left/right symmetry; somatic stem cell population maintenance; pattern specification process; anterior/posterior pattern specificatio…	nucleic acid binding; metal ion binding; DNA binding; DNA-binding transcription factor activity; sequence-specific DNA binding; DNA-binding transcription factor activity, RNA polymerase II-specific; RNA polymerase II regulatory region sequence-specific DNA binding; protein binding; RNA polymerase II proximal promoter sequence-specific DNA binding; DNA-binding transcription activator activity, RNA…	nucleus; cytoplasm; nucleoplasm
NEUROD6	2.0795e-29	-1.00755	0.308	0.667	7.61116e-25	nervous system development; regulation of transcription, DNA-templated; multicellular organism development; cell differentiation; dentate gyrus development; positive regulation of transcription by RNA polymerase II	protein dimerization activity; DNA binding; RNA polymerase II proximal promoter sequence-specific DNA binding; DNA-binding transcription activator activity, RNA polymerase II-specific; DNA-binding transcription factor activity, RNA polymerase II-specific	nucleus; nuclear chromatin
AUTS2	1.1051e-28	-0.75874	0.405	0.713	4.04479e-24	positive regulation of transcription by RNA polymerase II; positive regulation of lamellipodium assembly; actin cytoskeleton reorganization; neuron migration; axon extension; dendrite extension; positive regulation of Rac protein signal transduction; positive regulation of histone H3-K4 methylation; positive regulation of histone H4-K16 acetylation	protein binding; chromatin binding	nucleus; cytoplasm; cytoskeleton; cell projection; growth cone; actin cytoskeleton
SEPTIN6	8.27106e-27	0.755792	0.588	0.323	3.02729e-22	cell division; cell cycle; cell differentiation; spermatogenesis; cilium assembly; viral process; cytoskeleton-dependent cytokinesis; mitotic cytokinesis	nucleotide binding; GTP binding; protein binding; GTPase activity	cytoplasm; motile cilium; chromosome; cytoskeleton; cell projection; septin complex; spindle; midbody; chromosome, centromeric region; kinetochore; condensed chromosome kinetochore; cilium; cleavage furrow; microtubule cytoskeleton; septin ring; sperm annulus; synaptic vesicle; septin collar; axon terminus; presynapse
ABCA1	3.83396e-26	0.501738	0.381	0.135	1.40327e-21	cholesterol homeostasis; cellular response to low-density lipoprotein particle stimulus; transmembrane transport; lipid metabolic process; steroid metabolic process; cholesterol metabolic process; regulation of Cdc42 protein signal transduction; response to laminar fluid shear stress; cholesterol efflux; regulation of lipid metabolic process; lipid transport; high-density lipoprotein particle ass…	nucleotide binding; ATP binding; protein binding; ATPase activity; ATPase-coupled transmembrane transporter activity; ATPase-coupled intramembrane lipid transporter activity; lipid transporter activity; phosphatidylcholine binding; ATPase binding; signaling receptor binding; cholesterol binding; phospholipid transporter activity; high-density lipoprotein particle binding; syntaxin binding; small …	perinuclear region of cytoplasm; membrane; integral component of membrane; plasma membrane; endosome; intracellular membrane-bounded organelle; endoplasmic reticulum membrane; integral component of plasma membrane; membrane raft; Golgi apparatus; external side of plasma membrane; cell surface; endocytic vesicle; phagocytic vesicle
LINC02609	4.35384e-26	0.748925	0.591	0.319	1.59355e-21
PARM1	8.13739e-24	0.239478	0.11	0.005	2.97836e-19	positive regulation of telomerase activity		membrane; integral component of membrane; intracellular membrane-bounded organelle; nucleus; cytosol; Golgi apparatus; plasma membrane; Golgi membrane; endosome; early endosome; endosome membrane; late endosome
DLX2	7.25427e-23	0.642862	0.137	0.014	2.65514e-18	regulation of transcription, DNA-templated; multicellular organism development; cell differentiation; regulation of transcription by RNA polymerase II; positive regulation of transcription by RNA polymerase II; negative regulation of transcription by RNA polymerase II; positive regulation of cell differentiation; brain development; negative regulation of photoreceptor cell differentiation; positi…	DNA binding; sequence-specific DNA binding; protein binding; DNA-binding transcription factor activity; RNA polymerase II proximal promoter sequence-specific DNA binding; DNA-binding transcription factor activity, RNA polymerase II-specific; RNA polymerase II regulatory region sequence-specific DNA binding; DNA-binding transcription activator activity, RNA polymerase II-specific; chromatin bindin…	nucleus; nuclear chromatin
SLC17A6	8.26681e-23	0.691135	0.439	0.197	3.02573e-18	transmembrane transport; ion transport; sodium ion transport; L-glutamate transmembrane transport; synaptic transmission, glutamatergic; neurotransmitter transport; regulation of synapse structure or activity; neurotransmitter loading into synaptic vesicle	symporter activity; L-glutamate transmembrane transporter activity; neurotransmitter transmembrane transporter activity	membrane; integral component of membrane; integral component of plasma membrane; cell junction; cytoplasmic vesicle; synapse; neuron projection; synaptic vesicle membrane; integral component of synaptic vesicle membrane; excitatory synapse
MOXD1	9.0955e-23	0.252749	0.162	0.023	3.32904e-18	oxidation-reduction process; octopamine biosynthetic process; dopamine catabolic process; norepinephrine biosynthetic process	metal ion binding; monooxygenase activity; oxidoreductase activity; catalytic activity; protein binding; copper ion binding; oxidoreductase activity, acting on paired donors, with incorporation or reduction of molecular oxygen, reduced ascorbate as one donor, and incorporation of one atom of oxygen; dopamine beta-monooxygenase activity	membrane; integral component of membrane; endoplasmic reticulum; endoplasmic reticulum membrane; extracellular space; cytoplasm; secretory granule membrane
CD63	2.70464e-22	0.576051	0.945	0.833	9.89926e-18	protein transport; cell migration; neutrophil degranulation; platelet degranulation; regulation of vascular endothelial growth factor signaling pathway; cell-matrix adhesion; positive regulation of receptor internalization; cellular protein localization; endosome to melanosome transport; pigment granule maturation; regulation of potassium ion transmembrane transport; positive regulation of integr…	protein binding	membrane; integral component of membrane; lysosomal membrane; extracellular space; plasma membrane; extracellular region; melanosome; cell surface; lysosome; endosome; late endosome membrane; integral component of plasma membrane; extracellular exosome; endosome membrane; platelet dense granule membrane; multivesicular body membrane; intrinsic component of plasma membrane; azurophil granule membr…
RAB26	4.72437e-22	0.495822	0.326	0.115	1.72917e-17	protein transport; intracellular protein transport; Rab protein signal transduction; regulated exocytosis; regulation of exocytosis; Golgi to plasma membrane protein transport; exocrine system development; regulation of protein catabolic process at presynapse, modulating synaptic transmission	GTPase activity; GTP binding; nucleotide binding; protein binding; GMP binding	membrane; Golgi apparatus; Golgi membrane; cytoplasmic vesicle; intrinsic component of plasma membrane; transport vesicle membrane; secretory granule membrane; anchored component of synaptic vesicle membrane
NAV1	1.74863e-21	0.890985	0.662	0.504	6.40015e-17	neurogenesis; multicellular organism development; cell differentiation; nervous system development; microtubule bundle formation; neuron migration		cytoplasm; cytoskeleton; microtubule; microtubule cytoskeleton; axon initial segment
C1orf61	1.3826e-20	-0.44911	0.884	0.98	5.06046e-16	positive regulation of transcription by RNA polymerase II		nucleus
RPS10	2.29144e-20	-0.342812	0.994	0.998	8.38689e-16	translation; ribosomal small subunit assembly; viral transcription; translational initiation; nuclear-transcribed mRNA catabolic process, nonsense-mediated decay; SRP-dependent cotranslational protein targeting to membrane	RNA binding; structural constituent of ribosome; protein binding	nucleus; cytoplasm; membrane; cytosol; ribosome; cytosolic small ribosomal subunit; nucleolus; focal adhesion; nucleoplasm
PLXNA2	4.85928e-20	-0.468162	0.171	0.476	1.77855e-15	signal transduction; semaphorin-plexin signaling pathway; regulation of cell migration; regulation of cell shape; negative regulation of cell adhesion; regulation of GTPase activity; positive regulation of axonogenesis; semaphorin-plexin signaling pathway involved in axon guidance; somitogenesis; cell surface receptor signaling pathway; neural tube development; cerebellar granule cell precursor t…	protein binding; semaphorin receptor activity; identical protein binding	membrane; integral component of membrane; plasma membrane; integral component of plasma membrane; semaphorin receptor complex
ABRACL	6.28434e-20	-0.722372	0.573	0.759	2.30013e-15	regulation of actin filament-based process
POU3F2	8.72528e-20	0.698716	0.576	0.352	3.19354e-15	regulation of transcription, DNA-templated; regulation of transcription by RNA polymerase II; cell differentiation; brain development; nervous system development; neuron development; neuron fate specification; neuron differentiation; positive regulation of cell population proliferation; epidermis development; negative regulation of gene expression; astrocyte development; Schwann cell development;…	DNA binding; DNA-binding transcription factor activity; sequence-specific DNA binding; protein binding; identical protein binding; DNA-binding transcription factor activity, RNA polymerase II-specific; RNA polymerase II proximal promoter sequence-specific DNA binding; DNA-binding transcription activator activity, RNA polymerase II-specific; transcription coactivator activity	nucleus; nuclear chromatin; transcription factor complex
SLC1A2	5.63513e-18	0.449817	0.348	0.146	2.06251e-13	amino acid transport; ion transport; glutamate secretion; chemical synaptic transmission; L-glutamate transmembrane transport; protein homotrimerization; D-aspartate import across plasma membrane; L-glutamate import across plasma membrane; nervous system development; visual behavior; response to light stimulus; response to wounding; multicellular organism aging; telencephalon development; adult b…	metal ion binding; symporter activity; protein binding; L-glutamate transmembrane transporter activity; high-affinity glutamate transmembrane transporter activity; glutamate:sodium symporter activity; anion transmembrane transporter activity	membrane; integral component of membrane; plasma membrane; cell surface; integral component of plasma membrane; axon; axolemma; glutamatergic synapse; integral component of presynaptic membrane
RPS21	1.36548e-17	-0.244195	1	1	4.99778e-13	translation; cytoplasmic translation; viral transcription; translational initiation; nuclear-transcribed mRNA catabolic process, nonsense-mediated decay; SRP-dependent cotranslational protein targeting to membrane; endonucleolytic cleavage in ITS1 to separate SSU-rRNA from 5.8S rRNA and LSU-rRNA from tricistronic rRNA transcript (SSU-rRNA, 5.8S rRNA, LSU-rRNA); endonucleolytic cleavage to generat…	RNA binding; structural constituent of ribosome; protein N-terminus binding; protein binding	cytoplasm; endoplasmic reticulum; ribosome; cytosol; cytosolic small ribosomal subunit; nucleoplasm; rough endoplasmic reticulum; small ribosomal subunit; polysomal ribosome; synapse; intracellular
TLE1	3.18441e-17	0.674192	0.601	0.396	1.16553e-12	regulation of transcription, DNA-templated; Wnt signaling pathway; negative regulation of canonical Wnt signaling pathway; positive regulation of gene expression; negative regulation of Wnt signaling pathway; signal transduction; multicellular organism development; negative regulation of transcription, DNA-templated; beta-catenin-TCF complex assembly; animal organ morphogenesis; negative regulati…	protein binding; identical protein binding; transcription corepressor activity; repressing transcription factor binding; transcription factor binding	nucleus; nucleoplasm; cytosol; transcription factor complex; beta-catenin-TCF complex
CXXC4	2.11158e-16	0.306013	0.174	0.043	7.7286e-12		zinc ion binding; DNA binding
PHLDA1	2.93292e-16	-0.534105	0.39	0.644	1.07348e-11	apoptotic process; G2/M transition of mitotic cell cycle; positive regulation of apoptotic process; FasL biosynthetic process	protein binding	nucleus; nucleolus; cytoplasm; cytoplasmic vesicle; cytosol
RPL38	6.55227e-16	-0.256861	1	1	2.3982e-11	translation; cytoplasmic translation; viral transcription; translational initiation; nuclear-transcribed mRNA catabolic process, nonsense-mediated decay; SRP-dependent cotranslational protein targeting to membrane; skeletal system development; ossification; regulation of translation; sensory perception of sound; 90S preribosome assembly; middle ear morphogenesis; axial mesoderm development	structural constituent of ribosome; RNA binding	ribosome; focal adhesion; cytosolic large ribosomal subunit; cytosol; postsynaptic density; polysomal ribosome; intracellular; eukaryotic 80S initiation complex; synapse
NKAIN4	9.75543e-16	0.504184	0.735	0.546	3.57058e-11	regulation of sodium ion transport		membrane; integral component of membrane; plasma membrane
NR2F1-AS1	1.64658e-15	-0.34859	0.049	0.255	6.02665e-11
EPHA3	2.3148e-15	-0.5343	0.186	0.415	8.47239e-11	protein phosphorylation; phosphorylation; cell adhesion; transmembrane receptor protein tyrosine kinase signaling pathway; peptidyl-tyrosine phosphorylation; ephrin receptor signaling pathway; axon guidance; regulation of microtubule cytoskeleton organization; regulation of actin cytoskeleton organization; cell migration; regulation of epithelial to mesenchymal transition; regulation of GTPase ac…	nucleotide binding; protein kinase activity; ATP binding; kinase activity; transferase activity; protein tyrosine kinase activity; transmembrane receptor protein tyrosine kinase activity; ephrin receptor activity; protein binding; transmembrane-ephrin receptor activity; GPI-linked ephrin receptor activity	membrane; integral component of membrane; integral component of plasma membrane; plasma membrane; extracellular region; early endosome; receptor complex; neuron projection
NDUFA4	4.93029e-15	0.312548	0.991	0.996	1.80454e-10	oxidation-reduction process; proton transmembrane transport; mitochondrial electron transport, NADH to ubiquinone; mitochondrial electron transport, cytochrome c to oxygen	NADH dehydrogenase (ubiquinone) activity; protein-containing complex binding; protein binding; cytochrome-c oxidase activity	membrane; integral component of membrane; mitochondrial inner membrane; mitochondrion; respirasome; mitochondrial respiratory chain complex I; mitochondrial respiratory chain complex IV
TAC3	5.79003e-15	-1.11669	0.207	0.439	2.11921e-10	neuropeptide signaling pathway; tachykinin receptor signaling pathway; G protein-coupled receptor signaling pathway; female pregnancy	signaling receptor binding	extracellular region; extracellular space
NEFM	1.39054e-14	0.474283	0.271	0.107	5.08953e-10	neurofilament bundle assembly; axon development	structural molecule activity; protein binding; structural constituent of cytoskeleton; microtubule binding	intermediate filament cytoskeleton; intermediate filament; neurofilament; axon; neurofibrillary tangle
EDIL3	2.26709e-14	0.401457	0.314	0.139	8.29776e-10	cell adhesion; multicellular organism development; positive regulation of cell-substrate adhesion	metal ion binding; calcium ion binding; integrin binding; extracellular matrix structural constituent	extracellular region; extracellular exosome; collagen-containing extracellular matrix; extracellular vesicle
EML1	2.62635e-14	-0.368226	0.104	0.322	9.61269e-10	microtubule cytoskeleton organization; mitotic spindle organization; neuroblast proliferation; brain development; hematopoietic progenitor cell differentiation	protein binding; calcium ion binding; microtubule binding; tubulin binding	cytoplasm; cytosol; cytoskeleton; perinuclear region of cytoplasm; microtubule; microtubule cytoskeleton; mitotic spindle; mitotic spindle pole; mitotic spindle midzone; microtubule associated complex
TSPO	2.95605e-14	-0.410362	0.183	0.42	1.08194e-09	lipid transport; protein targeting to mitochondrion; C21-steroid hormone biosynthetic process; regulation of cell population proliferation; heme biosynthetic process; anion transport; steroid metabolic process; regulation of cholesterol transport; steroid biosynthetic process; ion transport; chloride transport; aging; glial cell migration; response to manganese ion; response to vitamin B1; negati…	protein binding; cholesterol binding; benzodiazepine receptor activity; androgen binding; ion channel binding	membrane; integral component of membrane; mitochondrion; endoplasmic reticulum; mitochondrial membrane; extracellular exosome; mitochondrial outer membrane
CCNI	3.28811e-14	0.346363	0.985	0.99	1.20348e-09	protein phosphorylation; regulation of cell cycle; spermatogenesis; regulation of cyclin-dependent protein serine/threonine kinase activity; mitotic cell cycle phase transition	protein kinase binding; protein kinase activity; cyclin-dependent protein serine/threonine kinase regulator activity	nucleus; cytoplasm; cyclin-dependent protein kinase holoenzyme complex
EBF2	3.68007e-14	0.360627	0.244	0.091	1.34694e-09	regulation of transcription, DNA-templated; multicellular organism development; positive regulation of transcription by RNA polymerase II; positive regulation of cold-induced thermogenesis; cell fate determination; positive regulation of chromatin binding; positive regulation of transcription, DNA-templated; brown fat cell differentiation; adipose tissue development	metal ion binding; protein dimerization activity; DNA binding; DNA-binding transcription factor activity; DNA-binding transcription activator activity, RNA polymerase II-specific; DNA-binding transcription factor activity, RNA polymerase II-specific; RNA polymerase II proximal promoter sequence-specific DNA binding; chromatin binding	nucleus; nuclear chromatin
MARCKS	4.14459e-14	-0.301391	0.997	0.997	1.51696e-09	actin filament bundle assembly; protein homooligomerization; actin crosslink formation	actin binding; calmodulin binding; actin filament binding; protein kinase C binding; identical protein binding	cytoplasm; membrane; cytoskeleton; focal adhesion; plasma membrane; extracellular exosome; actin cytoskeleton; centrosome; cell cortex; actin filament bundle; germinal vesicle
ST18	1.06225e-13	0.442031	0.506	0.316	3.88793e-09	regulation of transcription, DNA-templated; positive regulation of transcription by RNA polymerase II; negative regulation of cell population proliferation; positive regulation of cysteine-type endopeptidase activity involved in apoptotic signaling pathway; tumor necrosis factor-mediated signaling pathway; interleukin-1-mediated signaling pathway; interleukin-6-mediated signaling pathway	zinc ion binding; metal ion binding; DNA binding; DNA-binding transcription factor activity; RNA polymerase II regulatory region sequence-specific DNA binding; DNA-binding transcription activator activity, RNA polymerase II-specific; DNA-binding transcription factor activity, RNA polymerase II-specific; RNA polymerase II proximal promoter sequence-specific DNA binding; transcription regulator act…	nucleus; nuclear chromatin; protein-DNA complex
GSTP1	1.5761e-13	-0.402813	0.854	0.947	5.76867e-09	negative regulation of ERK1 and ERK2 cascade; negative regulation of MAPK cascade; negative regulation of fibroblast proliferation; negative regulation of MAP kinase activity; negative regulation of JUN kinase activity; cellular response to lipopolysaccharide; negative regulation of tumor necrosis factor-mediated signaling pathway; regulation of ERK1 and ERK2 cascade; negative regulation of prote…	transferase activity; protein binding; glutathione transferase activity; glutathione peroxidase activity; drug binding; JUN kinase binding; kinase regulator activity; protein kinase binding; S-nitrosoglutathione binding; dinitrosyl-iron complex binding; glutathione binding; nitric oxide binding	nucleus; cytoplasm; cytosol; mitochondrion; extracellular space; extracellular region; extracellular exosome; secretory granule lumen; ficolin-1-rich granule lumen; vesicle; plasma membrane; TRAF2-GSTP1 complex
EMX1	2.3887e-13	-0.439746	0.448	0.675	8.74289e-09	regulation of transcription, DNA-templated; multicellular organism development; negative regulation of transcription by RNA polymerase II; neuron differentiation; regulation of transcription by RNA polymerase II; central nervous system development; brain development; in utero embryonic development; post-embryonic development; telencephalon development; cerebral cortex regionalization; cerebral co…	DNA binding; sequence-specific DNA binding; protein binding; RNA polymerase II proximal promoter sequence-specific DNA binding; DNA-binding transcription factor activity, RNA polymerase II-specific; DNA-binding transcription repressor activity, RNA polymerase II-specific; RNA polymerase II intronic transcription regulatory region sequence-specific DNA binding	nucleus; cytoplasm; nucleolus; nuclear chromatin
CCND2	3.18198e-13	-0.208216	0.588	0.786	1.16464e-08	positive regulation of cell population proliferation; positive regulation of G1/S transition of mitotic cell cycle; negative regulation of apoptotic process; positive regulation of protein phosphorylation; protein phosphorylation; cell division; cell cycle; regulation of cyclin-dependent protein serine/threonine kinase activity; mitotic cell cycle phase transition; positive regulation of cyclin-d…	protein binding; protein kinase binding; protein kinase activity; cyclin-dependent protein serine/threonine kinase regulator activity	nucleus; cytoplasm; membrane; nucleoplasm; cytosol; nucleolus; nuclear membrane; chromatin; cyclin-dependent protein kinase holoenzyme complex
FZD7	4.09296e-13	-0.294038	0.03	0.197	1.49806e-08	negative regulation of cell-substrate adhesion; negative regulation of cardiac muscle cell differentiation; positive regulation of transcription, DNA-templated; signal transduction; cell surface receptor signaling pathway; G protein-coupled receptor signaling pathway; multicellular organism development; Wnt signaling pathway; canonical Wnt signaling pathway; Wnt signaling pathway, planar cell pol…	protein binding; transmembrane signaling receptor activity; G protein-coupled receptor activity; Wnt-activated receptor activity; Wnt-protein binding; phosphatidylinositol-4,5-bisphosphate binding; PDZ domain binding; frizzled binding	membrane; integral component of membrane; plasma membrane; endosome; endosome membrane; recycling endosome membrane
FABP7	4.51674e-13	0.579969	0.945	0.881	1.65317e-08	triglyceride catabolic process; nervous system development; negative regulation of cell population proliferation; startle response; cell proliferation in forebrain; neurogenesis; epithelial cell proliferation; prepulse inhibition	lipid binding	cytoplasm; cytosol; nucleus; cell-cell junction; cell projection; neuronal cell body; cell body; cell periphery
RPLP1	4.85353e-13	-0.226045	1	1	1.77644e-08	translation; cytoplasmic translation; translational elongation; regulation of translation; activation of protein kinase activity; viral transcription; translational initiation; nuclear-transcribed mRNA catabolic process, nonsense-mediated decay; SRP-dependent cotranslational protein targeting to membrane	structural constituent of ribosome; protein binding; ribonucleoprotein complex binding; protein kinase activator activity	ribosome; focal adhesion; cytosolic large ribosomal subunit; cytosol; intracellular
BAALC	5.97497e-13	0.41779	0.387	0.212	2.1869e-08			cytoplasm; membrane; nucleus; cytosol; plasma membrane; cell junction; synapse; postsynaptic membrane; membrane raft; postsynaptic density; neuron projection
GPX4	6.22934e-13	0.39033	0.902	0.806	2.28e-08	oxidation-reduction process; multicellular organism development; cellular oxidant detoxification; spermatogenesis; response to oxidative stress; phospholipid metabolic process; lipoxygenase pathway; long-chain fatty acid biosynthetic process; chromatin organization; glutathione metabolic process; aging; response to estradiol; regulation of inflammatory response; protein polymerization; negative r…	oxidoreductase activity; peroxidase activity; glutathione peroxidase activity; protein binding; identical protein binding; selenium binding; phospholipid-hydroperoxide glutathione peroxidase activity	nucleus; cytoplasm; nucleoplasm; mitochondrion; cytosol; extracellular exosome; protein-containing complex; nuclear envelope
KIF5C	6.45124e-13	0.505764	0.973	0.967	2.36122e-08	mRNA transport; microtubule-based movement; axon guidance; anterograde axonal protein transport; organelle organization; motor neuron axon guidance; synaptic vesicle transport; anterograde dendritic transport of neurotransmitter receptor complex	nucleotide binding; ATP binding; microtubule motor activity; protein binding; microtubule binding; ATPase activity; ATP-dependent microtubule motor activity, plus-end-directed	neuronal cell body; cytoplasm; dendrite cytoplasm; axon cytoplasm; cytoskeleton; cell projection; microtubule; dendrite; kinesin complex; ciliary rootlet; neuron projection; axonal growth cone; distal axon
RBFOX3	7.8943e-13	-0.36809	0.213	0.431	2.88939e-08	mRNA processing; RNA splicing; regulation of RNA splicing; regulation of alternative mRNA splicing, via spliceosome; nervous system development	nucleic acid binding; RNA binding; mRNA binding; DNA binding	nucleus; cytoplasm; neuronal cell body; perikaryon
FABP5	8.01539e-13	-0.598474	0.637	0.792	2.93371e-08	triglyceride catabolic process; neutrophil degranulation; glucose metabolic process; lipid metabolic process; phosphatidylcholine biosynthetic process; negative regulation of glucose transmembrane transport; regulation of prostaglandin biosynthetic process; positive regulation of peroxisome proliferator activated receptor signaling pathway; glucose homeostasis; regulation of sensory perception of…	lipid binding; protein binding; identical protein binding; retinoic acid binding; fatty acid binding	nucleus; cytoplasm; membrane; plasma membrane; extracellular region; cell junction; synapse; postsynaptic membrane; nucleoplasm; cytosol; extracellular exosome; postsynaptic density; extracellular space; secretory granule membrane; azurophil granule lumen
LINC01551	9.14272e-13	0.371734	0.948	0.92	3.34633e-08
MSI2	1.04645e-12	0.41377	0.72	0.596	3.83012e-08	stem cell development	nucleic acid binding; RNA binding; protein binding; single-stranded RNA binding; poly(U) RNA binding	cytoplasm; nucleus; ribonucleoprotein complex; polysome
RPS24	1.13828e-12	-0.19287	1	1	4.16624e-08	translation; rRNA processing; ribosomal small subunit biogenesis; viral transcription; translational initiation; nuclear-transcribed mRNA catabolic process, nonsense-mediated decay; SRP-dependent cotranslational protein targeting to membrane; erythrocyte homeostasis	structural constituent of ribosome; RNA binding; translation initiation factor binding	ribosome; intracellular; nucleus; membrane; cytosolic small ribosomal subunit; nucleoplasm; cytosol; small ribosomal subunit
SOX11	1.16938e-12	-0.342269	0.982	0.997	4.28003e-08	multicellular organism development; cell differentiation; positive regulation of transcription, DNA-templated; nervous system development; regulation of transcription, DNA-templated; neuron differentiation; negative regulation of transcription by RNA polymerase II; positive regulation of transcription by RNA polymerase II; positive regulation of gene expression; skeletal system development; posit…	DNA binding; DNA-binding transcription factor activity; transcription coactivator activity; DNA-binding transcription factor activity, RNA polymerase II-specific; transcription regulatory region sequence-specific DNA binding; RNA polymerase II proximal promoter sequence-specific DNA binding; enhancer sequence-specific DNA binding; DNA-binding transcription activator activity, RNA polymerase II-sp…	nucleus; cytoplasm; nuclear transcription factor complex; nuclear chromatin
LHFPL6	1.17453e-12	0.221622	0.119	0.025	4.29891e-08			membrane; integral component of membrane
HES6	1.36978e-12	-0.585811	0.555	0.755	5.01352e-08	regulation of transcription, DNA-templated; multicellular organism development; cell differentiation; negative regulation of transcription by RNA polymerase II; anterior/posterior pattern specification; regulation of neurogenesis; regulation of transcription by RNA polymerase II; nervous system development	protein dimerization activity; DNA binding; RNA polymerase II regulatory region sequence-specific DNA binding; DNA-binding transcription factor activity, RNA polymerase II-specific; DNA-binding transcription repressor activity, RNA polymerase II-specific; transcription factor binding; DNA-binding transcription factor activity; transcription coregulator activity	nucleus; nuclear chromatin; transcription factor complex
RPS26	2.64986e-12	-0.197516	1	1	9.69874e-08	translation; cytoplasmic translation; viral transcription; translational initiation; nuclear-transcribed mRNA catabolic process, nonsense-mediated decay; SRP-dependent cotranslational protein targeting to membrane; negative regulation of RNA splicing	RNA binding; structural constituent of ribosome; protein binding; mRNA binding; cadherin binding	cytoplasm; membrane; endoplasmic reticulum; ribosome; cytosol; cytosolic small ribosomal subunit; nucleoplasm; extracellular exosome; rough endoplasmic reticulum; cytoplasmic side of rough endoplasmic reticulum membrane; small ribosomal subunit; polysomal ribosome; intracellular
MIR217HG	3.40452e-12	0.167386	0.113	0.024	1.24609e-07
NUCKS1	5.83318e-12	0.317944	0.976	0.943	2.135e-07	regulation of transcription by RNA polymerase II; interstrand cross-link repair; positive regulation by host of viral transcription; cellular response to X-ray; double-strand break repair via homologous recombination; cellular glucose homeostasis; regulation of DNA replication; chromatin organization; release from viral latency; replication fork processing; gene conversion; glucose homeostasis; p…	RNA binding; transcription factor binding; chromatin binding; double-stranded DNA binding; DNA-binding transcription activator activity, RNA polymerase II-specific; single-stranded DNA binding	cytoplasm; nucleus; nucleolus; nuclear chromatin; chromatin
NEFL	6.53598e-12	0.202237	0.119	0.027	2.39224e-07	axon development; MAPK cascade; anterograde axonal transport; axonal transport of mitochondrion; intermediate filament organization; microtubule cytoskeleton organization; retrograde axonal transport; response to toxic substance; response to organic substance; peripheral nervous system axon regeneration; spinal cord development; hippocampus development; cerebral cortex development; regulation of …	protein binding; structural constituent of cytoskeleton; identical protein binding; protein C-terminus binding; protein binding, bridging; protein domain specific binding; phospholipase binding; protein heterodimerization activity; structural constituent of postsynaptic intermediate filament cytoskeleton	cytoplasm; axon cytoplasm; intermediate filament; neurofilament; axon; cytosol; growth cone; neuromuscular junction; neuron projection; Schaffer collateral - CA1 synapse; cholinergic synapse; postsynaptic intermediate filament cytoskeleton; presynaptic intermediate filament cytoskeleton
VIM	7.41297e-12	0.800463	0.851	0.722	2.71322e-07	positive regulation of translation; cellular response to lipopolysaccharide; viral process; cytokine-mediated signaling pathway; muscle filament sliding; cellular response to muramyl dipeptide; positive regulation of gene expression; negative regulation of neuron projection development; astrocyte development; positive regulation of collagen biosynthetic process; regulation of mRNA stability; inte…	protein binding; identical protein binding; structural constituent of cytoskeleton; protein domain specific binding; scaffold protein binding; double-stranded RNA binding; structural constituent of eye lens; keratin filament binding	cytoplasm; nucleus; cytosol; cytoskeleton; intermediate filament; focal adhesion; peroxisome; extracellular exosome; ribonucleoprotein complex; nuclear matrix; polysome; plasma membrane; cell leading edge; cell projection; neuron projection; phagocytic vesicle
HPCAL1	7.50582e-12	-0.3417	0.21	0.429	2.74721e-07		calcium ion binding; metal ion binding; protein binding	membrane
SNAP25	7.8317e-12	0.682469	0.476	0.315	2.86648e-07	potassium ion transmembrane transport; exocytosis; chemical synaptic transmission; neutrophil degranulation; vesicle fusion; synaptic vesicle priming; synaptic vesicle fusion to presynaptic active zone membrane; regulation of insulin secretion; glutamate secretion; neurotransmitter secretion; synaptic vesicle docking; synaptic vesicle exocytosis; neurotransmitter uptake; locomotory behavior; asso…	voltage-gated potassium channel activity; protein binding; SNARE binding; syntaxin-1 binding; SNAP receptor activity; syntaxin binding; calcium-dependent protein binding	cytoplasm; membrane; plasma membrane; perinuclear region of cytoplasm; cell junction; synapse; cytosol; specific granule membrane; tertiary granule membrane; SNARE complex; neuron projection; vesicle; cytoskeleton; voltage-gated potassium channel complex; BLOC-1 complex; trans-Golgi network; synaptic vesicle; axon; growth cone; extrinsic component of cytoplasmic side of plasma membrane; somatoden…
IGFBP5	1.0928e-11	-0.358232	0.04	0.197	3.99977e-07	positive regulation of vascular smooth muscle cell proliferation; positive regulation of vascular associated smooth muscle cell migration; negative regulation of insulin-like growth factor receptor signaling pathway; negative regulation of cell migration; negative regulation of smooth muscle cell proliferation; regulation of cell growth; osteoblast differentiation; female pregnancy; aging; hair f…	protein binding; insulin-like growth factor binding; fibronectin binding; growth factor binding; insulin-like growth factor I binding; insulin-like growth factor II binding	extracellular region; extracellular space; endoplasmic reticulum lumen; insulin-like growth factor binding protein complex; insulin-like growth factor ternary complex
RPL27A	1.34527e-11	0.224242	1	1	4.92381e-07	translation; viral transcription; translational initiation; nuclear-transcribed mRNA catabolic process, nonsense-mediated decay; SRP-dependent cotranslational protein targeting to membrane	RNA binding; structural constituent of ribosome; protein binding	membrane; endoplasmic reticulum; cytosol; ribosome; large ribosomal subunit; cytosolic large ribosomal subunit; intracellular
C14orf132	1.63159e-11	-0.332517	0.25	0.464	5.97179e-07			membrane; integral component of membrane
TBR1	1.82665e-11	0.482775	0.537	0.385	6.68574e-07	regulation of transcription, DNA-templated; positive regulation of transcription by RNA polymerase II; negative regulation of transcription by RNA polymerase II; cell fate specification; negative regulation of transcription, DNA-templated; brain development; heart looping; conditioned taste aversion; specification of animal organ identity; regulation of gene expression; regulation of neuron proje…	DNA binding; DNA-binding transcription factor activity; protein binding; identical protein binding; RNA polymerase II regulatory region sequence-specific DNA binding; DNA-binding transcription activator activity, RNA polymerase II-specific; DNA-binding transcription factor activity, RNA polymerase II-specific; RNA polymerase II activating transcription factor binding; RNA polymerase II proximal p…	nucleus
TLE5	1.83196e-11	-0.370446	0.71	0.828	6.70516e-07	regulation of transcription, DNA-templated; Wnt signaling pathway; negative regulation of canonical Wnt signaling pathway; negative regulation of gene expression; multicellular organism development; negative regulation of transcription by RNA polymerase II; negative regulation of transcription, DNA-templated; animal organ morphogenesis; negative regulation of protein binding; response to interleu…	protein binding; transcription corepressor activity; repressing transcription factor binding	nucleus; transcription factor complex
METRN	2.12294e-11	0.371667	0.354	0.193	7.77016e-07	signal transduction; multicellular organism development; cell differentiation; nervous system development; glial cell differentiation; positive regulation of axonogenesis	hormone activity	extracellular region; extracellular space
EPHA5	2.44394e-11	-0.316951	0.125	0.319	8.94508e-07	protein phosphorylation; phosphorylation; transmembrane receptor protein tyrosine kinase signaling pathway; peptidyl-tyrosine phosphorylation; ephrin receptor signaling pathway; nervous system development; axon guidance; neuron development; regulation of actin cytoskeleton organization; cAMP-mediated signaling; regulation of GTPase activity; positive regulation of CREB transcription factor activi…	nucleotide binding; protein kinase activity; ATP binding; kinase activity; transferase activity; protein tyrosine kinase activity; transmembrane receptor protein tyrosine kinase activity; ephrin receptor activity; transmembrane-ephrin receptor activity; GPI-linked ephrin receptor activity; protein binding	membrane; integral component of membrane; integral component of plasma membrane; plasma membrane; cell projection; perinuclear region of cytoplasm; dendrite; receptor complex; axon; neuron projection; external side of plasma membrane; rough endoplasmic reticulum; neuronal cell body; adherens junction; cell periphery
SEZ6	2.57483e-11	-0.343316	0.091	0.262	9.42412e-07	adult locomotory behavior; cerebellar Purkinje cell layer development; regulation of dendrite development; synapse maturation; excitatory postsynaptic potential; regulation of protein kinase C signaling		membrane; integral component of membrane; plasma membrane; endoplasmic reticulum; neuronal cell body; dendritic spine; dendritic shaft; perinuclear region of cytoplasm; apical dendrite
FOXG1	3.80315e-11	-0.393656	0.64	0.805	1.39199e-06	regulation of transcription, DNA-templated; multicellular organism development; regulation of transcription by RNA polymerase II; negative regulation of transcription, DNA-templated; brain development; aging	DNA binding; DNA-binding transcription factor activity; sequence-specific DNA binding; protein binding; DNA-binding transcription factor activity, RNA polymerase II-specific	nucleus; nuclear chromatin; nucleoplasm
KCNQ3	4.01716e-11	-0.343799	0.241	0.444	1.47032e-06	transmembrane transport; ion transport; potassium ion transport; regulation of ion transmembrane transport; potassium ion transmembrane transport; chemical synaptic transmission; membrane hyperpolarization	ion channel activity; voltage-gated ion channel activity; voltage-gated potassium channel activity; potassium channel activity; delayed rectifier potassium channel activity; calmodulin binding; protein binding	membrane; integral component of membrane; voltage-gated potassium channel complex; plasma membrane; integral component of plasma membrane; cell surface; node of Ranvier; axon initial segment
B2M	6.01182e-11	0.468507	0.552	0.391	2.20039e-06	immune response; immune system process; regulation of immune response; antigen processing and presentation of peptide antigen via MHC class I; cellular protein metabolic process; retina homeostasis; antigen processing and presentation of exogenous peptide antigen via MHC class I, TAP-dependent; innate immune response; neutrophil degranulation; positive regulation of receptor-mediated endocytosis;…	protein binding; identical protein binding; protein homodimerization activity	membrane; Golgi apparatus; cytosol; plasma membrane; extracellular space; extracellular region; cell surface; focal adhesion; MHC class I protein complex; extracellular exosome; phagocytic vesicle membrane; HFE-transferrin receptor complex; endoplasmic reticulum lumen; specific granule lumen; tertiary granule lumen; Golgi membrane; ER to Golgi transport vesicle membrane; MHC class I peptide loadi…
HMGB1	6.23159e-11	-0.260329	0.982	0.989	2.28082e-06	positive regulation of blood vessel endothelial cell migration; positive regulation of vascular endothelial cell proliferation; cellular response to lipopolysaccharide; DNA repair; DNA recombination; cellular response to DNA damage stimulus; inflammatory response; autophagy; immune system process; innate immune response; chemotaxis; DNA geometric change; adaptive immune response; positive chemota…	RNA binding; DNA binding; lyase activity; protein binding; cytokine activity; transcription coactivator activity; four-way junction DNA binding; bubble DNA binding; DNA binding, bending; supercoiled DNA binding; transcription factor binding; double-stranded DNA binding; lipopolysaccharide binding; transcription regulatory region DNA binding; repressing transcription factor binding; phosphatidylse…	nucleus; cytoplasm; membrane; chromosome; extracellular space; plasma membrane; extracellular region; cell surface; endosome; nuclear chromatin; nucleoplasm; secretory granule lumen; ficolin-1-rich granule lumen; endoplasmic reticulum-Golgi intermediate compartment; transcriptional repressor complex; condensed chromosome; alphav-beta3 integrin-HMGB1 complex
RPL36A	7.3026e-11	-0.210436	0.997	1	2.67283e-06	translation; cytoplasmic translation; viral transcription; translational initiation; nuclear-transcribed mRNA catabolic process, nonsense-mediated decay; SRP-dependent cotranslational protein targeting to membrane	structural constituent of ribosome; RNA binding; protein binding	endoplasmic reticulum; cytosol; ribosome; plasma membrane; intracellular; cytoplasm; cytosolic large ribosomal subunit; polysomal ribosome
NFIA	7.59666e-11	-0.327164	0.771	0.941	2.78045e-06	regulation of transcription, DNA-templated; DNA replication; positive regulation of transcription by RNA polymerase II; negative regulation of transcription by RNA polymerase II; viral genome replication; synapse maturation; ureter development	DNA binding; DNA-binding transcription factor activity; DNA-binding transcription factor activity, RNA polymerase II-specific; RNA polymerase II proximal promoter sequence-specific DNA binding; DNA-binding transcription activator activity, RNA polymerase II-specific; transcription factor binding; chromatin binding	nucleus; nucleoplasm; cell junction; intracellular; nuclear chromatin
CXXC5	8.65596e-11	0.389153	0.57	0.429	3.16817e-06	negative regulation of transcription by RNA polymerase II; positive regulation of I-kappaB kinase/NF-kappaB signaling	zinc ion binding; metal ion binding; DNA binding; sequence-specific DNA binding; protein binding; transcription factor binding	nucleus; cytoplasm; cytosol; nucleoplasm
HMGB2	1.27484e-10	0.495932	0.765	0.613	4.66603e-06	chromatin organization; nucleosome assembly; DNA recombination; inflammatory response; positive regulation of transcription, DNA-templated; immune system process; innate immune response; chemotaxis; DNA geometric change; positive chemotaxis; regulation of transcription by RNA polymerase II; positive regulation of transcription by RNA polymerase II; cellular response to lipopolysaccharide; DNA top…	RNA binding; DNA binding; protein binding; transcription factor binding; transcription coactivator activity; four-way junction DNA binding; supercoiled DNA binding; double-stranded DNA binding; enhancer sequence-specific DNA binding; transcription regulatory region DNA binding; single-stranded DNA binding; DNA binding, bending; chemoattractant activity; damaged DNA binding; RAGE receptor binding;…	nucleus; cytoplasm; nucleolus; cell; chromosome; extracellular space; extracellular region; perinuclear region of cytoplasm; nuclear chromatin; nucleoplasm; protein-containing complex; condensed chromosome
NDUFB8	1.37911e-10	0.489102	0.905	0.847	5.04769e-06	oxidation-reduction process; mitochondrial electron transport, NADH to ubiquinone; mitochondrial respiratory chain complex I assembly	NADH dehydrogenase (ubiquinone) activity; NADH dehydrogenase activity	membrane; integral component of membrane; mitochondrion; mitochondrial inner membrane; mitochondrial respiratory chain complex I; respirasome; mitochondrial matrix; endoplasmic reticulum
NFIX	1.97734e-10	-0.219372	0.043	0.191	7.23726e-06	regulation of transcription, DNA-templated; DNA replication; negative regulation of transcription by RNA polymerase II; positive regulation of transcription by RNA polymerase II; transcription by RNA polymerase II	DNA binding; DNA-binding transcription factor activity; protein binding; DNA-binding transcription factor activity, RNA polymerase II-specific	nucleus; nuclear chromatin; intracellular; nucleoplasm
RPL39	2.30205e-10	-0.154589	1	1	8.42573e-06	translation; cytoplasmic translation; viral transcription; innate immune response in mucosa; antibacterial humoral response; defense response to Gram-positive bacterium; antimicrobial humoral immune response mediated by antimicrobial peptide; translational initiation; nuclear-transcribed mRNA catabolic process, nonsense-mediated decay; SRP-dependent cotranslational protein targeting to membrane	RNA binding; structural constituent of ribosome	ribosome; extracellular space; cytosolic large ribosomal subunit; cytosol; polysomal ribosome; intracellular
CARMIL1	2.62759e-10	-0.304013	0.088	0.25	9.61724e-06	positive regulation of cell migration; barbed-end actin filament uncapping; positive regulation of lamellipodium organization; negative regulation of barbed-end actin filament capping; urate metabolic process; ruffle organization; positive regulation of actin filament polymerization; positive regulation of stress fiber assembly; blood coagulation; cell migration; actin filament organization; acti…	protein binding; protein-containing complex binding	lamellipodium; cytoplasm; nuclear speck; membrane; nucleus; cytosol; plasma membrane; cytoskeleton; cell projection; cell leading edge; extracellular exosome; filamentous actin; macropinosome
NEUROD2	3.13276e-10	-0.460432	0.329	0.513	1.14662e-05	nervous system development; regulation of transcription, DNA-templated; protein ubiquitination; multicellular organism development; negative regulation of nucleic acid-templated transcription; cell differentiation; regulation of neuron differentiation; regulation of transcription by RNA polymerase II; positive regulation of DNA-binding transcription factor activity; cellular response to calcium i…	protein dimerization activity; DNA binding; DNA-binding transcription factor activity, RNA polymerase II-specific; transcription corepressor activity; protein heterodimerization activity; DNA-binding transcription factor activity; E-box binding; RNA polymerase II regulatory region sequence-specific DNA binding; DNA-binding transcription activator activity, RNA polymerase II-specific	nucleus; nuclear chromatin
ATP2B1	3.60856e-10	0.39172	0.567	0.419	1.32077e-05	ion transport; calcium ion transport; calcium ion transmembrane transport; regulation of presynaptic cytosolic calcium ion concentration; ion transmembrane transport; positive regulation of calcium ion transport; regulation of blood pressure; positive regulation of bone mineralization; regulation of cardiac conduction; cellular calcium ion homeostasis; negative regulation of cytokine production; …	metal ion binding; nucleotide binding; ATP binding; protein binding; calcium transmembrane transporter activity, phosphorylative mechanism; calmodulin binding; ATPase activity; PDZ domain binding; calcium ion transmembrane transporter activity; calcium-transporting ATPase activity involved in regulation of presynaptic cytosolic calcium ion concentration	membrane; integral component of membrane; nucleus; plasma membrane; cell junction; synapse; extracellular exosome; basolateral plasma membrane; integral component of plasma membrane; glutamatergic synapse; immunological synapse; GABA-ergic synapse; cytoplasmic side of plasma membrane; apical plasma membrane; dendrite membrane; dendritic spine membrane; neuronal cell body membrane; membrane raft; …
ARID5B	6.13837e-10	0.421316	0.5	0.348	2.24671e-05	positive regulation of nucleic acid-templated transcription; regulation of transcription by RNA polymerase II; positive regulation of DNA-binding transcription factor activity; adipose tissue development; negative regulation of transcription by RNA polymerase II; liver development; negative regulation of transcription, DNA-templated; kidney development; nitrogen compound metabolic process; male g…	transcription coactivator activity; DNA binding; protein binding; DNA-binding transcription repressor activity, RNA polymerase II-specific; transcription regulatory region DNA binding; RNA polymerase II regulatory region sequence-specific DNA binding	nucleus; nucleoplasm
MEIS2	6.33776e-10	-0.456537	0.588	0.761	2.31968e-05	regulation of transcription, DNA-templated; multicellular organism development; positive regulation of transcription by RNA polymerase II; transcription by RNA polymerase II; negative regulation of myeloid cell differentiation; negative regulation of transcription by RNA polymerase II; eye development; visual learning; response to mechanical stimulus; pancreas development; positive regulation of …	DNA binding; protein binding; DNA-binding transcription factor activity, RNA polymerase II-specific; RNA polymerase II proximal promoter sequence-specific DNA binding; DNA-binding transcription activator activity, RNA polymerase II-specific; transcription factor binding; transcription corepressor activity; DNA-binding transcription factor activity; transcription coregulator activity; sequence-spe…	nucleus; cytoplasm; perinuclear region of cytoplasm; nuclear chromatin
EBF1	8.52109e-10	0.268077	0.223	0.099	3.1188e-05	regulation of transcription, DNA-templated; multicellular organism development; positive regulation of transcription by RNA polymerase II	metal ion binding; protein dimerization activity; DNA binding; DNA-binding transcription factor activity; protein binding; DNA-binding transcription activator activity, RNA polymerase II-specific; DNA-binding transcription factor activity, RNA polymerase II-specific; C2H2 zinc finger domain binding	nucleus; nuclear chromatin
RPS8	9.02831e-10	-0.161934	1	1	3.30445e-05	translation; maturation of SSU-rRNA from tricistronic rRNA transcript (SSU-rRNA, 5.8S rRNA, LSU-rRNA); viral transcription; translational initiation; nuclear-transcribed mRNA catabolic process, nonsense-mediated decay; SRP-dependent cotranslational protein targeting to membrane	RNA binding; structural constituent of ribosome; protein binding	nucleus; cytoplasm; membrane; endoplasmic reticulum; cytosol; ribosome; cytosolic small ribosomal subunit; focal adhesion; nucleoplasm; extracellular exosome; ribonucleoprotein complex; intracellular
KLHL35	9.5407e-10	-0.362631	0.204	0.385	3.49199e-05		protein binding
STXBP6	1.19185e-09	-0.395159	0.058	0.196	4.36227e-05	vesicle-mediated transport; exocytosis; Golgi to plasma membrane transport; exocyst localization; cell-cell adhesion; regulation of SNARE complex assembly; negative regulation of exocytosis	phosphatidylinositol-4,5-bisphosphate binding; GTP-Rho binding; cadherin binding involved in cell-cell adhesion	cytoplasm; membrane; integral component of membrane; plasma membrane; exocyst; cell-cell adherens junction
MAP1B	1.22824e-09	0.329727	1	1	4.49549e-05	nervous system development; microtubule cytoskeleton organization; dendrite development; axonogenesis; cellular process; axon extension; microtubule bundle formation; neuron migration; negative regulation of microtubule depolymerization; synapse assembly; response to wounding; response to mechanical stimulus; response to carbohydrate; response to inorganic substance; peripheral nervous system axo…	microtubule binding; protein binding; tubulin binding; actin binding; structural molecule activity; phospholipid binding; protein-containing complex binding	microtubule; neuronal cell body; cytoplasm; cytosol; cytoskeleton; cell projection; cell junction; synapse; dendritic spine; dendrite; microtubule associated complex; axon; somatodendritic compartment; basal dendrite; photoreceptor outer segment; plasma membrane; postsynaptic density; growth cone; varicosity; perikaryon; perinuclear region of cytoplasm; apical dendrite; hippocampal mossy fiber
CRABP2	1.30609e-09	0.386032	0.268	0.138	4.7804e-05	signal transduction; regulation of transcription, DNA-templated; epidermis development; regulation of retinoic acid receptor signaling pathway; retinoic acid biosynthetic process; embryonic forelimb morphogenesis; retinoic acid metabolic process; positive regulation of collateral sprouting	protein binding; lipid binding; retinoic acid binding; retinal binding; retinol binding; retinoid binding	nucleus; cytoplasm; cytosol; nucleoplasm; endoplasmic reticulum; extracellular exosome
ZNF428	1.37779e-09	-0.318136	0.848	0.925	5.04284e-05		nucleic acid binding; metal ion binding
ALDH7A1	1.4418e-09	0.342819	0.439	0.285	5.27714e-05	oxidation-reduction process; lysine catabolic process; sensory perception of sound; cellular aldehyde metabolic process; glycine betaine biosynthetic process from choline; choline catabolic process	oxidoreductase activity; oxidoreductase activity, acting on the aldehyde or oxo group of donors, NAD or NADP as acceptor; protein binding; aldehyde dehydrogenase (NAD) activity; glyceraldehyde-3-phosphate dehydrogenase (NAD+) (non-phosphorylating) activity; L-aminoadipate-semialdehyde dehydrogenase activity; betaine-aldehyde dehydrogenase activity	cytosol; mitochondrion; nucleus; cytoplasm; extracellular exosome; mitochondrial matrix
AL136366.1	1.46337e-09	-0.190029	0.003	0.109	5.3561e-05
LYST	1.59876e-09	0.282593	0.302	0.164	5.85162e-05	protein transport; defense response to virus; defense response to bacterium; lysosome organization; melanosome organization; endosome to lysosome transport via multivesicular body sorting pathway; leukocyte chemotaxis; defense response to protozoan; natural killer cell mediated cytotoxicity; mast cell secretory granule organization; pigmentation	protein binding	cytoplasm; microtubule cytoskeleton
ARHGEF2	1.69184e-09	-0.308208	0.22	0.39	6.1923e-05	cellular response to tumor necrosis factor; intracellular protein transport; intracellular signal transduction; cell division; regulation of Rho protein signal transduction; cell cycle; multicellular organism development; cell differentiation; immune system process; innate immune response; nervous system development; positive regulation of transcription by RNA polymerase II; positive regulation o…	metal ion binding; zinc ion binding; guanyl-nucleotide exchange factor activity; Rho guanyl-nucleotide exchange factor activity; protein binding; microtubule binding; Rho GTPase binding; transcription factor binding; Rac GTPase binding; Rac guanyl-nucleotide exchange factor activity	cytoplasm; membrane; Golgi apparatus; plasma membrane; cytoskeleton; cell projection; cell junction; cytoplasmic vesicle; microtubule; focal adhesion; spindle; bicellular tight junction; cytosol; ruffle membrane; protein-containing complex; vesicle; podosome; postsynaptic density; neuronal cell body; dendritic shaft; glutamatergic synapse; postsynaptic density, intracellular component
TCF4	1.775e-09	-0.342153	0.909	0.971	6.49667e-05	positive regulation of transcription by RNA polymerase II; cell differentiation; positive regulation of transcription, DNA-templated; nervous system development; positive regulation of neuron differentiation; DNA-templated transcription, initiation; transcription initiation from RNA polymerase II promoter; protein-DNA complex assembly; negative regulation of transcription by RNA polymerase II; re…	protein dimerization activity; DNA binding; DNA-binding transcription factor activity; protein binding; identical protein binding; RNA polymerase II proximal promoter sequence-specific DNA binding; DNA-binding transcription factor activity, RNA polymerase II-specific; DNA-binding transcription activator activity, RNA polymerase II-specific; protein C-terminus binding; protein heterodimerization a…	nucleus; nuclear chromatin; transcription factor complex; beta-catenin-TCF complex; beta-catenin-TCF7L2 complex
DNER	1.91251e-09	0.530839	0.518	0.397	6.99999e-05	Notch signaling pathway; endocytosis; neuron migration; synapse assembly; central nervous system development; Notch receptor processing; glial cell differentiation; skeletal muscle fiber development	calcium ion binding; Notch binding; protein binding; transmembrane signaling receptor activity; clathrin binding	membrane; integral component of membrane; plasma membrane; dendrite; early endosome; neuronal cell body
TMEM132A	2.00731e-09	-0.325872	0.305	0.501	7.34697e-05	cellular protein metabolic process; post-translational protein modification		membrane; integral component of membrane; endoplasmic reticulum; endoplasmic reticulum membrane; Golgi apparatus; Golgi membrane; extracellular exosome; endoplasmic reticulum lumen
TSPAN18	2.26261e-09	-0.30801	0.204	0.382	8.28137e-05			membrane; integral component of membrane; integral component of plasma membrane
KLHDC8B	2.47796e-09	0.213546	0.213	0.094	9.06958e-05	cell division; cell cycle; nuclear chromosome segregation; mitotic nuclear division; mitotic cytokinetic process	protein binding	cytoplasm; cytosol; midbody; intercellular bridge; cellularization cleavage furrow
TMEFF1	2.48108e-09	0.368476	0.796	0.712	9.08098e-05	multicellular organism development; neuromuscular junction development; motor neuron axon guidance; animal organ morphogenesis; tissue development; dendrite development; receptor clustering	protein binding	membrane; integral component of membrane; plasma membrane; basement membrane
TLE2	2.84179e-09	-0.178072	0.003	0.106	0.000104012	regulation of transcription, DNA-templated; Wnt signaling pathway; negative regulation of canonical Wnt signaling pathway; signal transduction; negative regulation of transcription, DNA-templated; beta-catenin-TCF complex assembly; animal organ morphogenesis	protein binding; transcription corepressor activity; repressing transcription factor binding	nucleus; focal adhesion; extracellular space; nuclear body; transcription factor complex; nucleoplasm
ANKRD44	2.94045e-09	-0.251729	0.095	0.25	0.000107624		protein binding
SYT1	3.44655e-09	-0.392391	0.768	0.826	0.000126147	neurotransmitter secretion; cell differentiation; vesicle-mediated transport; protein homooligomerization; membrane organization; glutamate secretion; chemical synaptic transmission; regulation of dopamine secretion; synaptic vesicle exocytosis; calcium-ion regulated exocytosis; regulation of calcium ion-dependent exocytosis; synaptic vesicle endocytosis; calcium ion-regulated exocytosis of neuro…	metal ion binding; protein binding; calcium-dependent phospholipid binding; calcium ion binding; SNARE binding; syntaxin binding; clathrin binding; phosphatidylserine binding; syntaxin-1 binding; low-density lipoprotein particle receptor binding; 1-phosphatidylinositol binding; calmodulin binding; phospholipid binding; phosphatidylinositol-4,5-bisphosphate binding; protein C-terminus binding; syn…	cytoplasm; membrane; integral component of membrane; synaptic vesicle; cell junction; cytoplasmic vesicle; synapse; plasma membrane; axon; synaptic vesicle membrane; dense core granule; exocytic vesicle; neuron projection; clathrin-coated vesicle membrane; transport vesicle membrane; chromaffin granule membrane; clathrin-sculpted gamma-aminobutyric acid transport vesicle membrane; clathrin-sculpt…
PANTR1	4.96381e-09	0.459023	0.857	0.8	0.00018168
SOX5	5.23044e-09	-0.313572	0.317	0.497	0.000191439	regulation of transcription, DNA-templated; positive regulation of transcription by RNA polymerase II; negative regulation of transcription, DNA-templated; positive regulation of chondrocyte differentiation; transcription by RNA polymerase II; cellular response to transforming growth factor beta stimulus; cell fate commitment; positive regulation of cartilage development; asymmetric neuroblast di…	DNA binding; protein binding; DNA-binding transcription factor activity, RNA polymerase II-specific; DNA-binding transcription factor activity	nucleus; nuclear chromatin
ENC1	5.53e-09	-0.273099	0.72	0.864	0.000202404	nervous system development; protein ubiquitination; multicellular organism development; proteasomal ubiquitin-independent protein catabolic process; negative regulation of translation; positive regulation of neuron projection development	actin binding; protein binding	nucleus; cytoplasm; cytoskeleton; nuclear matrix; Cul3-RING ubiquitin ligase complex; nuclear chromatin; nucleoplasm; nucleolus; neuronal cell body
PRMT1	5.60241e-09	0.312897	0.838	0.754	0.000205054	methylation; protein methylation; positive regulation of erythrocyte differentiation; positive regulation of p38MAPK cascade; DNA damage response, signal transduction by p53 class mediator resulting in cell cycle arrest; protein homooligomerization; positive regulation of cell population proliferation; cell surface receptor signaling pathway; neuron projection development; regulation of megakaryo…	transferase activity; methyltransferase activity; RNA binding; protein binding; histone methyltransferase activity (H4-R3 specific); identical protein binding; enzyme binding; methyl-CpG binding; histone methyltransferase activity; protein-arginine N-methyltransferase activity; mitogen-activated protein kinase p38 binding; S-adenosyl-L-methionine binding; protein methyltransferase activity; prote…	nucleus; cytoplasm; cytosol; nucleoplasm; methylosome
NRCAM	7.38106e-09	0.339607	0.655	0.526	0.000270154	cell adhesion; axonogenesis; angiogenesis; clustering of voltage-gated sodium channels; cell-cell adhesion; neuron migration; synapse assembly; heterotypic cell-cell adhesion; central nervous system development; regulation of axon extension; positive regulation of neuron differentiation; axonal fasciculation; axon guidance; protein localization; regulation of neuron projection development; neuron…	protein binding; ankyrin binding; protein binding involved in heterotypic cell-cell adhesion	membrane; integral component of membrane; plasma membrane; cell projection; extracellular region; integral component of plasma membrane; axon; neuron projection; external side of plasma membrane; axon initial segment; synapse; glutamatergic synapse; integral component of postsynaptic membrane; integral component of postsynaptic density membrane
UNCX	1.00338e-08	0.273817	0.25	0.126	0.000367246	regulation of transcription, DNA-templated; multicellular organism development; cell differentiation; regulation of transcription by RNA polymerase II; nervous system development; cartilage condensation; pattern specification process; regulation of gene expression; dorsal spinal cord development; olfactory bulb interneuron differentiation; common myeloid progenitor cell proliferation; regulation …	DNA binding; sequence-specific DNA binding; DNA-binding transcription factor activity, RNA polymerase II-specific	nucleus; nuclear chromatin
MN1	1.06186e-08	-0.236013	0.07	0.211	0.000388651	regulation of transcription, DNA-templated; intramembranous ossification; multicellular organism development
RASGRP1	1.44178e-08	-0.464238	0.308	0.47	0.000527706	intracellular signal transduction; small GTPase mediated signal transduction; cell differentiation; positive regulation of GTPase activity; positive regulation of protein phosphorylation; MAPK cascade; positive regulation of ERK1 and ERK2 cascade; signal transduction; positive regulation of interferon-gamma secretion; protein complex oligomerization; Ras protein signal transduction; positive regu…	metal ion binding; calcium ion binding; zinc ion binding; protein homodimerization activity; guanyl-nucleotide exchange factor activity; phosphatidylcholine binding; phosphatidylserine binding; Ras guanyl-nucleotide exchange factor activity; lipid binding; diacylglycerol binding	cytoplasm; membrane; cytosol; endoplasmic reticulum; endoplasmic reticulum membrane; Golgi apparatus; plasma membrane; Golgi membrane; mast cell granule; intracellular
CA12	1.59837e-08	-0.245269	0.085	0.227	0.000585018	bicarbonate transport; chloride ion homeostasis	zinc ion binding; metal ion binding; lyase activity; carbonate dehydratase activity	membrane; integral component of membrane; plasma membrane
CKB	1.94716e-08	0.318389	0.991	0.988	0.000712681	phosphorylation; phosphocreatine biosynthetic process; substantia nigra development; creatine metabolic process; brain development; cerebellum development; cellular chloride ion homeostasis	nucleotide binding; ATP binding; kinase activity; transferase activity; catalytic activity; transferase activity, transferring phosphorus-containing groups; protein binding; creatine kinase activity; ubiquitin protein ligase binding	cytoplasm; cytosol; extracellular space; extracellular exosome; nucleus; dendrite; neuronal cell body
NDRG4	1.96791e-08	0.279331	0.28	0.153	0.000720274	positive regulation of ERK1 and ERK2 cascade; negative regulation of smooth muscle cell proliferation; cell differentiation; signal transduction; embryonic heart tube development; heart looping; brain development; negative regulation of platelet-derived growth factor receptor signaling pathway; negative regulation of smooth muscle cell migration; positive regulation of neuron projection developme…	protein binding	cytoplasm; cytosol; endoplasmic reticulum membrane; mitochondrion; basolateral plasma membrane; cell projection membrane; membrane; integral component of membrane
ZIC2	2.09448e-08	0.2953	0.335	0.196	0.000766599	multicellular organism development; cell differentiation; positive regulation of transcription, DNA-templated; regulation of transcription by RNA polymerase II; nervous system development; visual perception; central nervous system development; negative regulation of transcription, DNA-templated; brain development; positive regulation of DNA-binding transcription factor activity	nucleic acid binding; metal ion binding; DNA binding; DNA-binding transcription factor activity; chromatin DNA binding; DNA-binding transcription factor activity, RNA polymerase II-specific; RNA polymerase II regulatory region sequence-specific DNA binding	nucleus; cytoplasm; nuclear body
DDX46	2.09647e-08	-0.300565	0.601	0.799	0.000767328	mRNA processing; RNA splicing; mRNA splicing, via spliceosome	nucleic acid binding; ATP binding; RNA binding; nucleotide binding; hydrolase activity; helicase activity; RNA helicase activity	nuclear speck; fibrillar center; nucleus; membrane; nucleoplasm; Cajal body
AL589740.1	2.09843e-08	0.215387	0.198	0.088	0.000768045
ITM2C	2.23477e-08	0.345454	0.424	0.292	0.000817949	positive regulation of extrinsic apoptotic signaling pathway; neuron differentiation; negative regulation of neuron projection development; negative regulation of amyloid precursor protein biosynthetic process	ATP binding; protein binding; amyloid-beta binding	membrane; integral component of membrane; lysosomal membrane; plasma membrane; perinuclear region of cytoplasm; lysosome; Golgi apparatus; extracellular exosome
ADGRL2	2.28288e-08	0.203294	0.22	0.104	0.000835557	G protein-coupled receptor signaling pathway; signal transduction; cell surface receptor signaling pathway; adenylate cyclase-activating G protein-coupled receptor signaling pathway; brain development	G protein-coupled receptor activity; carbohydrate binding; transmembrane signaling receptor activity; latrotoxin receptor activity	membrane; integral component of membrane; integral component of plasma membrane; neuron projection
FZD3	2.37469e-08	0.306079	0.787	0.708	0.000869161	signal transduction; cell surface receptor signaling pathway; G protein-coupled receptor signaling pathway; multicellular organism development; Wnt signaling pathway; nervous system development; canonical Wnt signaling pathway; non-canonical Wnt signaling pathway; neuron differentiation; Wnt signaling pathway, planar cell polarity pathway; Wnt signaling pathway, calcium modulating pathway; midbra…	transmembrane signaling receptor activity; G protein-coupled receptor activity; Wnt-activated receptor activity; protein binding; Wnt-protein binding; PDZ domain binding	cytoplasm; membrane; integral component of membrane; plasma membrane; cell surface; apical plasma membrane; lateral plasma membrane; axon; dendrite; filopodium tip; neuronal cell body; apical part of cell; presynaptic active zone
ARMCX1	2.44009e-08	0.251318	0.375	0.228	0.000893096		protein binding	membrane; integral component of membrane; mitochondrion; mitochondrial outer membrane
MPPED2	2.51088e-08	0.358201	0.488	0.345	0.000919006		metal ion binding; nucleotide binding; hydrolase activity; protein binding; manganese ion binding; AMP binding; phosphoric diester hydrolase activity; GMP binding
SOX4	3.2049e-08	-0.233626	1	0.998	0.00117303	positive regulation of cell population proliferation; positive regulation of apoptotic process; protein stabilization; ventricular septum morphogenesis; positive regulation of canonical Wnt signaling pathway; positive regulation of transcription, DNA-templated; positive regulation of translation; regulation of transcription, DNA-templated; cell differentiation; positive regulation of transcriptio…	DNA binding; DNA-binding transcription factor activity; protein binding; transcription coactivator activity; DNA-binding transcription factor activity, RNA polymerase II-specific; transcription regulatory region sequence-specific DNA binding; RNA polymerase II proximal promoter sequence-specific DNA binding; DNA-binding transcription activator activity, RNA polymerase II-specific	cytoplasm; nucleus; nucleoplasm; mitochondrion; nuclear transcription factor complex; nuclear chromatin
MAP6	3.67258e-08	0.368214	0.527	0.405	0.0013442	microtubule cytoskeleton organization; cytoskeleton-dependent intracellular transport; regulation of microtubule cytoskeleton organization; positive regulation of axonogenesis; lysosome localization; dendrite morphogenesis	microtubule binding; calmodulin binding; protein binding	cytoplasm; membrane; Golgi apparatus; cytoskeleton; cell projection; perinuclear region of cytoplasm; cytoplasmic vesicle; microtubule; dendrite; cis-Golgi network; axon; transport vesicle membrane; Golgi-associated vesicle
ANKRD37	3.96551e-08	0.297525	0.274	0.151	0.00145142		protein binding	nucleus; cytoplasm; cytosol; mitochondrion
SPIRE1	4.46691e-08	-0.292795	0.311	0.48	0.00163493	protein transport; vesicle-mediated transport; actin nucleation; actin cytoskeleton organization; intracellular transport; cleavage furrow formation; positive regulation of double-strand break repair; polar body extrusion after meiotic divisions; establishment of meiotic spindle localization; formin-nucleated actin cable assembly	actin binding	cytoplasm; membrane; cytosol; nucleoplasm; plasma membrane; cytoskeleton; perinuclear region of cytoplasm; cytoplasmic vesicle; cytoplasmic vesicle membrane; cell cortex; cleavage furrow
LINC01563	4.77475e-08	-0.171907	0.021	0.125	0.00174761
KCNK12	5.04632e-08	-0.177283	0.009	0.102	0.001847	ion transport; potassium ion transport; regulation of ion transmembrane transport; potassium ion transmembrane transport; stabilization of membrane potential	voltage-gated ion channel activity; potassium channel activity; potassium ion leak channel activity	membrane; integral component of membrane; integral component of plasma membrane
LRRC4C	5.7179e-08	0.190079	0.155	0.062	0.00209281	regulation of axonogenesis; modulation of chemical synaptic transmission; synaptic membrane adhesion	protein binding; cell adhesion molecule binding; cell-cell adhesion mediator activity	membrane; integral component of membrane; extracellular space; plasma membrane; cell junction; synapse; postsynaptic membrane; Schaffer collateral - CA1 synapse; glutamatergic synapse; integral component of postsynaptic density membrane
DDAH2	6.13782e-08	-0.314065	0.832	0.905	0.0022465	citrulline metabolic process; arginine catabolic process; positive regulation of nitric oxide biosynthetic process; negative regulation of apoptotic process; regulation of nitric-oxide synthase activity; arginine metabolic process; nitric oxide mediated signal transduction; nitric oxide biosynthetic process	dimethylargininase activity; hydrolase activity; protein binding; catalytic activity; amino acid binding	cytoplasm; cytosol; mitochondrion; microtubule organizing center; extracellular exosome
STMN2	6.43576e-08	0.651827	0.707	0.603	0.00235555	regulation of microtubule polymerization or depolymerization; positive regulation of microtubule depolymerization; microtubule depolymerization; neuron projection development; regulation of cytoskeleton organization; positive regulation of neuron projection development; negative regulation of neuron projection development; negative regulation of microtubule depolymerization; negative regulation o…	protein binding; calcium-dependent protein binding; tubulin binding	cytoplasm; membrane; Golgi apparatus; cell projection; perinuclear region of cytoplasm; endosome; axon; neuron projection; lamellipodium; growth cone; neuronal cell body; vesicle
OTULINL	6.57987e-08	0.126712	0.119	0.04	0.0024083	proteolysis		nucleus; cytoplasm; membrane; endoplasmic reticulum; endoplasmic reticulum membrane; nuclear envelope; extrinsic component of endoplasmic reticulum membrane
FTL	6.71901e-08	0.211884	1	0.999	0.00245923	cellular iron ion homeostasis; oxidation-reduction process; iron ion transport; neutrophil degranulation; iron ion homeostasis; intracellular sequestering of iron ion	metal ion binding; protein binding; ferric iron binding; iron ion binding; identical protein binding; ferroxidase activity; ferrous iron binding	cell; membrane; extracellular region; cytoplasm; cytosol; extracellular exosome; azurophil granule lumen; intracellular ferritin complex; autolysosome
SYT7	6.73012e-08	0.305687	0.265	0.15	0.00246329	exocytosis; vesicle-mediated transport; phagocytosis; regulation of insulin secretion; regulation of dopamine secretion; calcium-ion regulated exocytosis; regulation of calcium ion-dependent exocytosis; cellular response to calcium ion; plasma membrane repair; synaptic vesicle recycling; regulation of bone remodeling; calcium ion-regulated exocytosis of neurotransmitter; regulation of phagocytosi…	metal ion binding; protein binding; calcium-dependent phospholipid binding; calmodulin binding; calcium ion binding; phosphatidylinositol-4,5-bisphosphate binding; SNARE binding; clathrin binding; phosphatidylserine binding; syntaxin binding	membrane; integral component of membrane; cytosol; lysosomal membrane; plasma membrane; cell junction; cytoplasmic vesicle; synapse; lysosome; peroxisome; peroxisomal membrane; extracellular exosome; phagocytic vesicle membrane; synaptic vesicle; presynaptic membrane; synaptic vesicle membrane; exocytic vesicle; transport vesicle membrane; early phagosome; dense core granule; hippocampal mossy fi…
COL9A3	7.32859e-08	-0.2504	0.04	0.152	0.00268234	extracellular matrix organization; male gonad development; female gonad development	extracellular matrix structural constituent; extracellular matrix structural constituent conferring tensile strength	extracellular region; collagen trimer; extracellular space; extracellular matrix; collagen-containing extracellular matrix; endoplasmic reticulum lumen; collagen type IX trimer
RBM17	7.4013e-08	0.301136	0.701	0.605	0.00270895	mRNA processing; RNA splicing; regulation of RNA splicing; regulation of alternative mRNA splicing, via spliceosome; DNA repair; mRNA splicing, via spliceosome; alternative mRNA splicing, via spliceosome	nucleic acid binding; RNA binding; protein binding	nucleus; nucleoplasm; spliceosomal complex; protein-containing complex
SPRY1	7.5809e-08	0.225433	0.238	0.122	0.00277468	negative regulation of cell population proliferation; negative regulation of Ras protein signal transduction; negative regulation of ERK1 and ERK2 cascade; organ induction; epithelial to mesenchymal transition involved in cardiac fibroblast development; multicellular organism development; regulation of signal transduction; negative regulation of epidermal growth factor receptor signaling pathway;…	protein binding	cytoplasm; membrane; Golgi apparatus; cytosol; nucleoplasm; plasma membrane
EBF3	8.45312e-08	0.213839	0.134	0.051	0.00309392	regulation of transcription, DNA-templated; multicellular organism development; positive regulation of transcription, DNA-templated; positive regulation of transcription by RNA polymerase II	metal ion binding; protein dimerization activity; DNA binding; DNA-binding transcription factor activity; DNA-binding transcription activator activity, RNA polymerase II-specific; DNA-binding transcription factor activity, RNA polymerase II-specific; RNA polymerase II proximal promoter sequence-specific DNA binding	nucleus; nuclear chromatin
DCC	8.88952e-08	0.450202	0.604	0.51	0.00325365	nervous system development; apoptotic process; axon guidance; multicellular organism development; netrin-activated signaling pathway; axonogenesis; negative regulation of netrin-activated signaling pathway; regulation of neuron death; extrinsic apoptotic signaling pathway in absence of ligand; neuron migration; negative regulation of neuron projection development; spinal cord ventral commissure m…	protein binding; netrin receptor activity; transmembrane signaling receptor activity	membrane; integral component of membrane; plasma membrane; cytosol; axon; Schaffer collateral - CA1 synapse; integral component of postsynaptic density membrane
CLU	9.22644e-08	0.408751	0.506	0.4	0.00337697	positive regulation of gene expression; apoptotic process; immune system process; innate immune response; regulation of complement activation; protein stabilization; response to virus; positive regulation of apoptotic process; regulation of cell population proliferation; positive regulation of proteasomal ubiquitin-dependent protein catabolic process; positive regulation of NF-kappaB transcriptio…	protein binding; ubiquitin protein ligase binding; amyloid-beta binding; signaling receptor binding; tau protein binding; unfolded protein binding; chaperone binding; protein-containing complex binding; low-density lipoprotein particle receptor binding; misfolded protein binding	extracellular space; cytoplasm; nucleus; membrane; endoplasmic reticulum; intracellular membrane-bounded organelle; mitochondrial inner membrane; mitochondrion; cytosol; extracellular region; perinuclear region of cytoplasm; cytoplasmic vesicle; cell surface; mitochondrial membrane; extracellular exosome; collagen-containing extracellular matrix; blood microparticle; protein-containing complex; p…
NKAIN3-IT1	1.03423e-07	0.274247	0.247	0.13	0.0037854
AKT3	1.09094e-07	-0.28822	0.482	0.665	0.00399295	positive regulation of blood vessel endothelial cell migration; positive regulation of vascular endothelial cell proliferation; positive regulation of cell migration involved in sprouting angiogenesis; negative regulation of cellular senescence; protein phosphorylation; phosphorylation; intracellular signal transduction; signal transduction; peptidyl-serine phosphorylation; positive regulation of…	nucleotide binding; protein kinase activity; protein serine/threonine kinase activity; ATP binding; kinase activity; transferase activity; protein binding	nucleus; cytoplasm; membrane
NTPCR	1.24133e-07	0.248895	0.372	0.241	0.00454339	dephosphorylation	RNA binding; nucleotide binding; ATP binding; hydrolase activity; nucleoside-triphosphatase activity; nucleotide phosphatase activity, acting on free nucleotides	membrane
RPL10	1.44484e-07	-0.144722	1	1	0.00528827	translation; multicellular organism development; ribosomal large subunit assembly; regulation of translation; viral transcription; translational initiation; nuclear-transcribed mRNA catabolic process, nonsense-mediated decay; SRP-dependent cotranslational protein targeting to membrane; negative regulation of transcription by RNA polymerase II; negative regulation of apoptotic process; embryonic b…	RNA binding; structural constituent of ribosome; protein binding; translation regulator activity	membrane; endoplasmic reticulum; cytosol; ribosome; cytosolic large ribosomal subunit; protein-containing complex; nucleus; smooth endoplasmic reticulum; intracellular
RUFY3	1.46397e-07	0.277169	0.841	0.788	0.00535827	multicellular organism development; cell differentiation; nervous system development; positive regulation of axon extension; regulation of establishment of cell polarity; actin filament organization; positive regulation of cell migration; positive regulation of intracellular protein transport; regulation of axonogenesis; negative regulation of axonogenesis	protein binding; metal ion binding	cytoplasm; membrane; cytosol; cell projection; cell junction; dendrite; axon; lamellipodium; filopodium; growth cone; perikaryon; endomembrane system; neuronal cell body; invadopodium
ALKBH7	1.54155e-07	0.300014	0.723	0.647	0.00564223	oxidation-reduction process; fatty acid metabolic process; cellular response to DNA damage stimulus; regulation of mitochondrial membrane permeability involved in programmed necrotic cell death; programmed cell death; regulation of lipid storage	metal ion binding; oxidoreductase activity; dioxygenase activity	mitochondrion; mitochondrial matrix
CSAD	1.55794e-07	-0.252407	0.195	0.342	0.00570223	carboxylic acid metabolic process; taurine biosynthetic process; L-cysteine catabolic process to hypotaurine; L-cysteine catabolic process to taurine	catalytic activity; lyase activity; carboxy-lyase activity; pyridoxal phosphate binding; aspartate 1-decarboxylase activity; sulfinoalanine decarboxylase activity	cytoplasm
TOX3	1.58003e-07	0.386491	0.375	0.247	0.00578308	apoptotic process; positive regulation of transcription, DNA-templated; regulation of transcription by RNA polymerase II; regulation of apoptotic process; negative regulation of neuron apoptotic process	DNA binding; protein homodimerization activity; protein binding; DNA-binding transcription factor activity, RNA polymerase II-specific; chromatin binding; estrogen response element binding; phosphoprotein binding	nucleus
RPL37	1.84528e-07	-0.136659	1	1	0.0067539	translation; viral transcription; translational initiation; nuclear-transcribed mRNA catabolic process, nonsense-mediated decay; SRP-dependent cotranslational protein targeting to membrane	RNA binding; metal ion binding; structural constituent of ribosome; rRNA binding	ribosome; cytosolic large ribosomal subunit; cytosol; intracellular
RGS16	1.93167e-07	-0.45948	0.399	0.572	0.00707012	G protein-coupled receptor signaling pathway; positive regulation of GTPase activity; visual perception; negative regulation of signal transduction; regulation of G protein-coupled receptor signaling pathway	GTPase activator activity; protein binding; GTPase activity; calmodulin binding	membrane; plasma membrane; cytoplasm; intrinsic component of membrane
RPS25	1.94846e-07	-0.157479	1	1	0.00713157	translation; viral transcription; translational initiation; nuclear-transcribed mRNA catabolic process, nonsense-mediated decay; SRP-dependent cotranslational protein targeting to membrane	RNA binding; protein binding; structural constituent of ribosome	nucleus; ribosome; cytosolic small ribosomal subunit; nucleolus; nucleoplasm; cytosol; extracellular exosome; postsynaptic density; small ribosomal subunit
RPL31	1.96686e-07	-0.171216	1	1	0.00719892	translation; cytoplasmic translation; viral transcription; translational initiation; nuclear-transcribed mRNA catabolic process, nonsense-mediated decay; SRP-dependent cotranslational protein targeting to membrane	RNA binding; structural constituent of ribosome; protein binding	membrane; ribosome; focal adhesion; cytosolic large ribosomal subunit; cytosol; extracellular exosome; polysomal ribosome; intracellular
KLF13	1.96718e-07	-0.297123	0.378	0.553	0.00720007	regulation of transcription by RNA polymerase II; transcription by RNA polymerase II; negative regulation of cell population proliferation; negative regulation of erythrocyte differentiation; positive regulation of transcription by RNA polymerase II	nucleic acid binding; metal ion binding; DNA binding; protein binding; DNA-binding transcription factor activity, RNA polymerase II-specific; RNA polymerase II proximal promoter sequence-specific DNA binding; DNA-binding transcription activator activity, RNA polymerase II-specific	nucleus; nuclear chromatin
SLC3A2	2.37491e-07	-0.344715	0.692	0.806	0.00869242	carbohydrate metabolic process; sodium ion transmembrane transport; calcium ion transport; amino acid transport; leukocyte migration; response to exogenous dsRNA; tryptophan transport; L-alpha-amino acid transmembrane transport; L-leucine import across plasma membrane	RNA binding; catalytic activity; protein binding; cadherin binding; double-stranded RNA binding; neutral amino acid transmembrane transporter activity; calcium:sodium antiporter activity	membrane; integral component of membrane; nucleus; cytosol; lysosomal membrane; plasma membrane; melanosome; cell junction; cell surface; lysosome; extracellular exosome; apical plasma membrane; amino acid transport complex; synapse
KLHDC8A	2.39529e-07	0.311753	0.284	0.164	0.00876701		protein binding
NKAIN3	2.40253e-07	0.255425	0.372	0.234	0.00879351	regulation of sodium ion transport		membrane; integral component of membrane; plasma membrane
INHBB	2.63392e-07	-0.188544	0.073	0.198	0.0096404	cell differentiation; defense response; fat cell differentiation; regulation of apoptotic process; cellular response to starvation; SMAD protein signal transduction; positive regulation of pathway-restricted SMAD protein phosphorylation; regulation of MAPK cascade; cell development; cellular response to insulin stimulus; response to wounding; ovarian follicle development; positive regulation of f…	growth factor activity; protein homodimerization activity; cytokine activity; hormone activity; protein binding; transforming growth factor beta receptor binding; host cell surface receptor binding	extracellular region; perinuclear region of cytoplasm; extracellular space; cell periphery
CYYR1	2.88893e-07	0.102843	0.104	0.033	0.0105738			membrane; integral component of membrane
ODC1	3.16648e-07	-0.228699	0.973	0.985	0.0115896	polyamine biosynthetic process; regulation of protein catabolic process; regulation of cellular amino acid metabolic process; response to virus; putrescine biosynthetic process from ornithine; kidney development; polyamine metabolic process; positive regulation of cell population proliferation; putrescine biosynthetic process	catalytic activity; lyase activity; protein homodimerization activity; protein binding; carboxy-lyase activity; ornithine decarboxylase activity	cytoplasm; cytosol; perinuclear region of cytoplasm
SVIP	3.34817e-07	0.431803	0.524	0.414	0.0122547	positive regulation of autophagy; neutrophil degranulation; negative regulation of protein complex assembly; negative regulation of ER-associated ubiquitin-dependent protein catabolic process; negative regulation of retrograde protein transport, ER to cytosol; positive regulation of protein lipidation; negative regulation of VCP-NPL4-UFD1 AAA ATPase complex assembly	protein binding; protein self-association; ATPase binding	membrane; endoplasmic reticulum; endoplasmic reticulum membrane; Golgi apparatus; plasma membrane; Golgi membrane; extracellular exosome; tertiary granule membrane; secretory granule membrane; smooth endoplasmic reticulum membrane; anchored component of membrane
SPINK5	3.45754e-07	-0.46715	0.134	0.263	0.012655	cell differentiation; negative regulation of peptidase activity; central nervous system development; multicellular organism development; epithelial cell differentiation; negative regulation of angiogenesis; cornification; regulation of T cell differentiation; negative regulation of immune response; extracellular matrix organization; epidermal cell differentiation; hair cell differentiation; negat…	protein binding; serine-type endopeptidase inhibitor activity; peptidase inhibitor activity	cytoplasm; intracellular membrane-bounded organelle; endoplasmic reticulum; endoplasmic reticulum membrane; cytosol; extracellular region; perinuclear region of cytoplasm; cell cortex; epidermal lamellar body
VCAN	3.46354e-07	-0.323273	0.47	0.63	0.0126769	cell adhesion; cellular protein metabolic process; post-translational protein modification; central nervous system development; multicellular organism development; extracellular matrix organization; skeletal system development; chondroitin sulfate biosynthetic process; chondroitin sulfate catabolic process; dermatan sulfate biosynthetic process; osteoblast differentiation; cell recognition	carbohydrate binding; calcium ion binding; protein binding; hyaluronic acid binding; extracellular matrix structural constituent conferring compression resistance; glycosaminoglycan binding	extracellular space; membrane; extracellular region; extracellular matrix; collagen-containing extracellular matrix; endoplasmic reticulum lumen; lysosomal lumen; Golgi lumen
MFAP4	3.67807e-07	-0.254412	0.098	0.221	0.0134621	cell adhesion; supramolecular fiber organization; UV protection; regulation of collagen metabolic process; elastic fiber assembly; cellular response to UV-B	protein binding; extracellular matrix structural constituent	extracellular region; collagen-containing extracellular matrix; elastic fiber; microfibril
SLC35F1	3.70092e-07	0.157812	0.168	0.076	0.0135457	transmembrane transport	transmembrane transporter activity	membrane; integral component of membrane
SGK1	4.15838e-07	-0.174451	0.027	0.124	0.0152201	protein phosphorylation; phosphorylation; apoptotic process; intracellular signal transduction; ion transmembrane transport; peptidyl-serine phosphorylation; regulation of cell population proliferation; neuron projection morphogenesis; regulation of cell growth; sodium ion transport; cellular response to DNA damage stimulus; long-term memory; regulation of blood pressure; regulation of cell migra…	nucleotide binding; protein kinase activity; protein serine/threonine kinase activity; ATP binding; kinase activity; transferase activity; protein binding; potassium channel regulator activity; protein serine/threonine/tyrosine kinase activity; calcium channel regulator activity; sodium channel regulator activity; chloride channel regulator activity; phosphatidylinositol binding	nucleus; cytoplasm; nuclear speck; membrane; cytosol; endoplasmic reticulum; endoplasmic reticulum membrane; mitochondrion; plasma membrane
CASP3	4.48619e-07	0.288707	0.375	0.25	0.0164199	proteolysis; positive regulation of catalytic activity; apoptotic process; erythrocyte differentiation; neuron differentiation; positive regulation of amyloid-beta formation; regulation of protein stability; apoptotic DNA fragmentation; cytokine-mediated signaling pathway; execution phase of apoptosis; hippo signaling; response to tumor necrosis factor; regulation of macroautophagy; platelet form…	cysteine-type peptidase activity; cysteine-type endopeptidase activity; hydrolase activity; protein binding; peptidase activity; cysteine-type endopeptidase activity involved in apoptotic process; protease binding; aspartic-type endopeptidase activity; cyclin-dependent protein serine/threonine kinase inhibitor activity; death receptor binding; phospholipase A2 activator activity; protein-containi…	nucleus; cytoplasm; cytosol; nucleoplasm; death-inducing signaling complex; neuronal cell body; membrane raft
HEY1	4.64136e-07	-0.228452	0.152	0.295	0.0169879	positive regulation of gene expression; positive regulation of transcription by RNA polymerase II; ventricular septum morphogenesis; negative regulation of Notch signaling pathway; regulation of transcription, DNA-templated; multicellular organism development; Notch signaling pathway; cell differentiation; negative regulation of transcription by RNA polymerase II; anterior/posterior pattern speci…	protein dimerization activity; DNA binding; DNA-binding transcription factor activity; RNA polymerase II regulatory region sequence-specific DNA binding; protein binding; DNA-binding transcription factor activity, RNA polymerase II-specific; DNA-binding transcription repressor activity, RNA polymerase II-specific; transcription factor binding	nucleus; cytoplasm; nuclear chromatin; nucleoplasm
HIST1H4C	4.68327e-07	-0.290626	0.482	0.631	0.0171412	nucleosome assembly; DNA-templated transcription, initiation; cellular protein metabolic process; regulation of gene silencing by miRNA; CENP-A containing nucleosome assembly; regulation of megakaryocyte differentiation; DNA replication-dependent nucleosome assembly; DNA replication-independent nucleosome assembly; chromatin silencing at rDNA; negative regulation of gene expression, epigenetic; p…	RNA binding; DNA binding; protein heterodimerization activity; protein binding; protein domain specific binding	nucleus; membrane; nucleosome; chromosome; extracellular region; nucleoplasm; extracellular exosome; protein-containing complex; nuclear chromosome, telomeric region; nuclear chromosome; nuclear nucleosome
SLC12A5	4.84671e-07	-0.208487	0.116	0.245	0.0177394	transmembrane transport; ion transport; potassium ion transport; chemical synaptic transmission; chloride transmembrane transport; cell volume homeostasis; chloride ion homeostasis; potassium ion homeostasis; potassium ion import across plasma membrane; dendritic spine development; cellular ion homeostasis; chloride transport; hypotonic response; learning; cellular chloride ion homeostasis; multi…	transmembrane transporter activity; symporter activity; cation:chloride symporter activity; potassium:chloride symporter activity; chloride transmembrane transporter activity; transporter activity	membrane; integral component of membrane; integral component of plasma membrane; plasma membrane
NRN1	4.93805e-07	-0.263051	0.165	0.308	0.0180738	nervous system development; neuron projection extension; regulation of synaptic vesicle exocytosis	protein homodimerization activity; protein heterodimerization activity	membrane; plasma membrane; cell junction; synapse; extracellular region; anchored component of membrane; extracellular space; AMPA glutamate receptor complex; anchored component of plasma membrane; glutamatergic synapse
BAIAP2-DT	5.45302e-07	-0.227986	0.155	0.298	0.0199586
RPL30	5.57108e-07	-0.115477	1	1	0.0203907	translation; cytoplasmic translation; defense response to Gram-negative bacterium; viral transcription; antimicrobial humoral immune response mediated by antimicrobial peptide; translational initiation; nuclear-transcribed mRNA catabolic process, nonsense-mediated decay; killing of cells of other organism; SRP-dependent cotranslational protein targeting to membrane	RNA binding; structural constituent of ribosome; protein binding	nucleus; membrane; ribosome; postsynaptic density; cytosolic large ribosomal subunit; focal adhesion; cytosol; extracellular exosome; polysomal ribosome; intracellular
FAM122B	6.20187e-07	0.250905	0.186	0.09	0.0226995			collagen trimer
GNB1	6.21876e-07	0.266924	0.869	0.811	0.0227613	signal transduction; G protein-coupled receptor signaling pathway; phospholipase C-activating G protein-coupled receptor signaling pathway; positive regulation of cytosolic calcium ion concentration; cell population proliferation; cardiac muscle cell apoptotic process; sensory perception of taste; retina development in camera-type eye; cellular response to hypoxia; protein folding; platelet activ…	spectrin binding; alkylglycerophosphoethanolamine phosphodiesterase activity; protein binding; GTPase activity; protein-containing complex binding; GTPase binding	lysosomal membrane; photoreceptor outer segment; photoreceptor inner segment; heterotrimeric G-protein complex; dendrite; photoreceptor outer segment membrane; cell body; plasma membrane; cytosol; extracellular exosome; extracellular vesicle; membrane; photoreceptor disc membrane
MDFI	6.85552e-07	-0.152625	0.027	0.122	0.0250919	multicellular organism development; cell differentiation; negative regulation of transcription by RNA polymerase II; negative regulation of Wnt signaling pathway; cytoplasmic sequestering of transcription factor; negative regulation of DNA binding; dorsal/ventral axis specification; embryonic skeletal system morphogenesis; trophoblast giant cell differentiation	protein binding; identical protein binding; transcription factor binding	nucleus; cytoplasm
DMRTA2	6.9294e-07	-0.217578	0.22	0.377	0.0253623	regulation of transcription, DNA-templated; regulation of transcription by RNA polymerase II; positive regulation of neuroblast proliferation; cerebral cortex regionalization; skeletal muscle cell differentiation; neuron fate specification; dopaminergic neuron differentiation	metal ion binding; DNA binding; DNA-binding transcription factor activity; sequence-specific DNA binding; DNA-binding transcription factor activity, RNA polymerase II-specific; protein homodimerization activity; protein binding; protein heterodimerization activity	nucleus; nuclear chromatin
LRP10	7.04668e-07	0.146837	0.125	0.049	0.0257916	endocytosis; lipid metabolic process; lipid transport; inner ear development	low-density lipoprotein particle receptor activity; protein binding	membrane; integral component of membrane; clathrin-coated pit
EPHA7	7.13328e-07	-0.156573	0.058	0.167	0.0261085	protein phosphorylation; phosphorylation; transmembrane receptor protein tyrosine kinase signaling pathway; peptidyl-tyrosine phosphorylation; apoptotic process; multicellular organism development; nervous system development; axon guidance; ephrin receptor signaling pathway; brain development; positive regulation of neuron apoptotic process; negative chemotaxis; regulation of ERK1 and ERK2 cascad…	nucleotide binding; protein kinase activity; ATP binding; kinase activity; transferase activity; protein tyrosine kinase activity; transmembrane receptor protein tyrosine kinase activity; ephrin receptor activity; protein binding; chemorepellent activity; transmembrane-ephrin receptor activity; GPI-linked ephrin receptor activity; axon guidance receptor activity; ephrin receptor binding	membrane; integral component of membrane; integral component of plasma membrane; plasma membrane; receptor complex; neuron projection; dendrite; neuromuscular junction; neuronal cell body; postsynaptic membrane; Schaffer collateral - CA1 synapse; hippocampal mossy fiber to CA3 synapse; glutamatergic synapse; integral component of postsynaptic specialization membrane; integral component of postsyn…
PLXNA3	7.68391e-07	0.253638	0.32	0.203	0.0281239	signal transduction; multicellular organism development; semaphorin-plexin signaling pathway; regulation of cell migration; regulation of cell shape; negative regulation of cell adhesion; regulation of GTPase activity; positive regulation of axonogenesis; semaphorin-plexin signaling pathway involved in axon guidance; axon guidance; facial nerve structural organization; trigeminal nerve structural…	protein binding; semaphorin receptor activity; transmembrane signaling receptor activity	membrane; integral component of membrane; intracellular membrane-bounded organelle; nucleus; plasma membrane; cell junction; integral component of plasma membrane; semaphorin receptor complex
TENM4	7.71141e-07	-0.239418	0.277	0.428	0.0282245	signal transduction; multicellular organism development; cell differentiation; neuron development; regulation of myelination; heterophilic cell-cell adhesion via plasma membrane cell adhesion molecules; positive regulation of oligodendrocyte differentiation; positive regulation of gastrulation; positive regulation of myelination; gastrulation with mouth forming second; central nervous system myel…	protein homodimerization activity; protein heterodimerization activity; cell adhesion molecule binding; identical protein binding	nucleus; cytoplasm; membrane; integral component of membrane; plasma membrane; cell projection; neuron projection; integral component of plasma membrane
ATP5F1E	7.9282e-07	0.176783	0.988	0.99	0.029018	ion transport; ATP synthesis coupled proton transport; ATP biosynthetic process; cristae formation; mitochondrial ATP synthesis coupled proton transport	hydrolase activity; protein binding; proton-transporting ATP synthase activity, rotational mechanism; ATPase activity; transmembrane transporter activity	membrane; mitochondrial inner membrane; mitochondrion; mitochondrial matrix; proton-transporting ATP synthase complex, catalytic core F(1); mitochondrial proton-transporting ATP synthase complex; mitochondrial proton-transporting ATP synthase complex, catalytic core F(1)
KLHL23	8.00853e-07	-0.266166	0.53	0.682	0.029312		protein binding
MINDY2	8.31961e-07	0.276505	0.604	0.505	0.0304506	proteolysis; protein K48-linked deubiquitination	thiol-dependent ubiquitin-specific protease activity; Lys48-specific deubiquitinase activity; hydrolase activity; peptidase activity; cysteine-type peptidase activity; thiol-dependent ubiquitinyl hydrolase activity; cysteine-type carboxypeptidase activity; K6-linked polyubiquitin modification-dependent protein binding; K63-linked polyubiquitin modification-dependent protein binding; K48-linked po…	nucleoplasm; cytosol
ENO2	8.38561e-07	0.352993	0.726	0.648	0.0306922	glycolytic process; gluconeogenesis; canonical glycolysis	magnesium ion binding; phosphopyruvate hydratase activity; metal ion binding; lyase activity; protein binding	phosphopyruvate hydratase complex; cytoplasm; membrane; cytosol; plasma membrane; extracellular space; extracellular exosome; photoreceptor inner segment; neuronal cell body; perikaryon
GADD45G	1.02062e-06	-0.28185	0.634	0.773	0.0373557	apoptotic process; multicellular organism development; cell differentiation; regulation of cell cycle; positive regulation of apoptotic process; positive regulation of cold-induced thermogenesis; positive regulation of JNK cascade; positive regulation of p38MAPK cascade; activation of MAPKKK activity	protein binding	nucleus; cytoplasm
TOMM6	1.09336e-06	0.259626	0.848	0.783	0.0400183	protein transport; macroautophagy		membrane; mitochondrion; mitochondrial outer membrane; mitochondrial outer membrane translocase complex
HEBP2	1.10084e-06	-0.27338	0.634	0.744	0.0402919	neutrophil degranulation; negative regulation of mitochondrial membrane potential; positive regulation of necrotic cell death; positive regulation of mitochondrial membrane permeability	protein binding; heme binding	cytoplasm; mitochondrion; extracellular region; extracellular exosome; azurophil granule lumen
BEX1	1.1339e-06	-0.256337	0.738	0.834	0.0415018	positive regulation of DNA-binding transcription factor activity; positive regulation of transcription by RNA polymerase II; multicellular organism development; cell differentiation; nervous system development	protein binding; RNA polymerase II activating transcription factor binding	nucleus; cytoplasm; transcription factor complex
NME2	1.15898e-06	0.247928	0.954	0.928	0.0424199	phosphorylation; integrin-mediated signaling pathway; nucleoside diphosphate phosphorylation; GTP biosynthetic process; UTP biosynthetic process; CTP biosynthetic process; nucleotide metabolic process; positive regulation of transcription, DNA-templated; positive regulation of transcription by RNA polymerase II; neutrophil degranulation; purine nucleotide metabolic process; pyrimidine nucleotide …	metal ion binding; nucleotide binding; ATP binding; kinase activity; transferase activity; DNA binding; protein binding; nucleoside diphosphate kinase activity; transcription coactivator activity; GDP binding; protein histidine kinase activity; G-quadruplex DNA binding; protein serine/threonine kinase activity; fatty acid binding; drug binding; intermediate filament binding; enzyme binding	nucleus; cytoplasm; cell projection; extracellular region; cytosol; lamellipodium; extracellular exosome; cell periphery; ruffle; secretory granule lumen; ficolin-1-rich granule lumen; intermediate filament; mitochondrial membrane; perinuclear region of cytoplasm
UBE2E3	1.19601e-06	0.265795	0.823	0.723	0.0437752	protein ubiquitination; protein K11-linked ubiquitination; protein K48-linked ubiquitination; regulation of growth; protein K63-linked ubiquitination	nucleotide binding; ATP binding; transferase activity; protein binding; ubiquitin-protein transferase activity; ubiquitin conjugating enzyme activity	nucleus; cytoplasm; nucleoplasm; cytosol
C2orf66	1.31496e-06	-0.273464	0.213	0.353	0.0481287			extracellular region
CIB1	1.3272e-06	0.203377	0.345	0.225	0.0485769	positive regulation of protein localization to plasma membrane; negative regulation of apoptotic process; cell adhesion; cell division; cell cycle; apoptotic process; cell differentiation; negative regulation of protein serine/threonine kinase activity; spermatogenesis; positive regulation of protein phosphorylation; positive regulation of protein serine/threonine kinase activity; negative regula…	metal ion binding; calcium ion binding; protein binding; protein membrane anchor; Ras GTPase binding; calcium-dependent protein kinase inhibitor activity; protein serine/threonine kinase inhibitor activity; protein C-terminus binding; protein kinase binding; ion channel binding	cytoplasm; nucleus; membrane; nucleoplasm; Golgi apparatus; plasma membrane; cytoskeleton; cell projection; perinuclear region of cytoplasm; centrosome; microtubule organizing center; lamellipodium; growth cone; extracellular exosome; cell periphery; sarcolemma; ruffle membrane; apical plasma membrane; neuron projection; vesicle; endoplasmic reticulum; neuronal cell body; filopodium tip; axon; de…
JAZF1	1.33704e-06	0.143333	0.128	0.052	0.0489371	lipid metabolic process; negative regulation of transcription by RNA polymerase II	nucleic acid binding; metal ion binding; protein binding; DNA-binding transcription factor activity, RNA polymerase II-specific; transcription corepressor activity	nucleus; cytosol; fibrillar center; transcriptional repressor complex
ACSL3	1.42507e-06	0.291781	0.57	0.475	0.0521591	lipid metabolic process; fatty acid metabolic process; long-chain fatty acid metabolic process; fatty acid biosynthetic process; brain development; response to nutrient; response to organic cyclic compound; long-chain fatty-acyl-CoA biosynthetic process; long-chain fatty acid import into cell; very-low-density lipoprotein particle assembly; positive regulation of Golgi to plasma membrane protein …	nucleotide binding; ATP binding; catalytic activity; ligase activity; long-chain fatty acid-CoA ligase activity; arachidonate-CoA ligase activity; protein kinase binding; protein domain specific binding; acyl-CoA ligase activity; decanoate-CoA ligase activity	membrane; integral component of membrane; endoplasmic reticulum; endoplasmic reticulum membrane; organelle membrane; intracellular membrane-bounded organelle; Golgi apparatus; mitochondrion; perinuclear region of cytoplasm; mitochondrial outer membrane; peroxisome; peroxisomal membrane; lipid droplet
CADM1	1.47077e-06	-0.248009	0.607	0.735	0.0538318	cell adhesion; apoptotic process; multicellular organism development; cell differentiation; immune system process; spermatogenesis; viral process; homophilic cell adhesion via plasma membrane adhesion molecules; cell recognition; positive regulation of natural killer cell mediated cytotoxicity; adherens junction organization; heterophilic cell-cell adhesion via plasma membrane cell adhesion molec…	protein homodimerization activity; protein binding; signaling receptor binding; PDZ domain binding	membrane; integral component of membrane; plasma membrane; cell junction; synapse; basolateral plasma membrane; cell-cell junction
GNG5	1.4984e-06	0.398752	0.841	0.78	0.0548431	G protein-coupled receptor signaling pathway; signal transduction	GTPase activity; protein binding; G-protein beta-subunit binding; PDZ domain binding	membrane; plasma membrane; heterotrimeric G-protein complex; G-protein beta/gamma-subunit complex; extracellular exosome
EIF2AK4	1.54709e-06	-0.251936	0.256	0.396	0.0566251	protein phosphorylation; phosphorylation; DNA damage checkpoint; cell cycle; immune system process; adaptive immune response; defense response to virus; nervous system development; regulation of translation; cell cycle arrest; positive regulation of long-term synaptic potentiation; viral process; regulation of translational initiation by eIF2 alpha phosphorylation; long-term memory; regulation of…	RNA binding; nucleotide binding; protein kinase activity; protein serine/threonine kinase activity; ATP binding; kinase activity; transferase activity; tRNA binding; eukaryotic translation initiation factor 2alpha kinase activity; protein binding; ubiquitin protein ligase activity	cytoplasm; nucleus; polysome; cytosolic ribosome
DCXR	1.54767e-06	0.311991	0.595	0.504	0.0566464	oxidation-reduction process; carbohydrate metabolic process; glucose metabolic process; xylulose metabolic process; NADP metabolic process; protein homotetramerization; glucuronate catabolic process to xylulose 5-phosphate; D-xylose metabolic process	oxidoreductase activity; identical protein binding; oxidoreductase activity, acting on CH-OH group of donors; L-xylulose reductase (NADP+) activity; oxidoreductase activity, acting on NAD(P)H, quinone or similar compound as acceptor; carbonyl reductase (NADPH) activity; L-xylulose reductase (NAD+) activity	nucleus; membrane; plasma membrane; microvillus; brush border; extracellular exosome; cytoplasmic microtubule
ZC3H6	1.56127e-06	-0.247274	0.235	0.379	0.0571442	regulation of transcription by RNA polymerase II; negative regulation of transcription, DNA-templated	metal ion binding; DNA-binding transcription factor activity; DNA-binding transcription factor activity, RNA polymerase II-specific	nucleus; nuclear chromatin
SLC4A10	1.59656e-06	-0.167065	0.046	0.144	0.0584358	ion transport; sodium ion transport; chloride transport; anion transport; anion transmembrane transport; visual perception; regulation of short-term neuronal synaptic plasticity; bicarbonate transport; regulation of intracellular pH; inorganic anion transport; regulation of pH; response to light stimulus; post-embryonic development; pyramidal neuron development; regulation of cellular pH; multice…	symporter activity; antiporter activity; anion transmembrane transporter activity; inorganic anion exchanger activity; sodium:bicarbonate symporter activity; anion:anion antiporter activity	membrane; integral component of membrane; plasma membrane; cell projection; cell junction; synapse; dendrite; axon; perikaryon; basolateral plasma membrane; apical plasma membrane; neuronal cell body; somatodendritic compartment; axon terminus; apical dendrite; basal dendrite; CA3 pyramidal cell dendrite
UBE2B	1.60287e-06	0.256264	0.793	0.707	0.0586667	protein ubiquitination; DNA repair; cellular response to DNA damage stimulus; protein autoubiquitination; ubiquitin-dependent protein catabolic process; spermatogenesis; protein K48-linked ubiquitination; protein stabilization; proteasome-mediated ubiquitin-dependent protein catabolic process; positive regulation of canonical Wnt signaling pathway; response to UV; protein polyubiquitination; prot…	nucleotide binding; ATP binding; transferase activity; protein binding; ubiquitin-protein transferase activity; ubiquitin conjugating enzyme activity; ubiquitin protein ligase binding	nucleus; cytoplasm; membrane; plasma membrane; nuclear chromatin; nucleoplasm; chromatin; replication fork; HULC complex; XY body
PRXL2A	1.66737e-06	0.272199	0.659	0.564	0.0610274	oxidation-reduction process; cellular oxidant detoxification; regulation of osteoclast differentiation	antioxidant activity	cytoplasm; extracellular region
ECI1	1.86429e-06	0.26283	0.53	0.416	0.0682347	lipid metabolic process; fatty acid metabolic process; fatty acid beta-oxidation	isomerase activity; catalytic activity; dodecenoyl-CoA delta-isomerase activity; enoyl-CoA hydratase activity	mitochondrion; mitochondrial matrix
FAM89B	1.91027e-06	-0.234441	0.445	0.6	0.0699177	positive regulation of cell migration; establishment of cell polarity; negative regulation of transforming growth factor beta receptor signaling pathway; negative regulation of SMAD protein signal transduction	transcription corepressor binding	cytoplasm; cell projection; lamellipodium
SLF1	1.91376e-06	-0.232121	0.122	0.241	0.0700454	DNA repair; cellular response to DNA damage stimulus; positive regulation of double-strand break repair; positive regulation of protein complex assembly; positive regulation of maintenance of mitotic sister chromatid cohesion; protein localization to site of double-strand break	protein binding; ubiquitin protein ligase binding; protein-containing complex binding	nucleus; cytoplasm; nucleosome; cytoskeleton; centrosome; microtubule organizing center; site of double-strand break; nuclear inclusion body
HNRNPDL	1.98364e-06	-0.193686	0.985	0.995	0.0726032	interleukin-12-mediated signaling pathway	nucleic acid binding; RNA binding; DNA binding; protein binding; sequence-specific DNA binding; poly(A) binding; poly(G) binding; sequence-specific double-stranded DNA binding	nucleus; cytoplasm; nucleoplasm; cytosol; ribonucleoprotein complex
PCMTD1	2.03762e-06	0.28737	0.527	0.42	0.074579	cellular protein modification process; methylation; protein methylation	protein-L-isoaspartate (D-aspartate) O-methyltransferase activity	cytoplasm; membrane
SMARCA2	2.12167e-06	-0.173954	0.052	0.152	0.0776551	positive regulation of transcription by RNA polymerase II; positive regulation of transcription, DNA-templated; regulation of transcription, DNA-templated; nervous system development; ATP-dependent chromatin remodeling; negative regulation of cell population proliferation; negative regulation of transcription by RNA polymerase II; negative regulation of transcription, DNA-templated; regulation of…	nucleotide binding; ATP binding; hydrolase activity; DNA binding; protein binding; ATPase activity; histone binding; helicase activity; transcription coactivator activity; hydrolase activity, acting on acid anhydrides; transcription regulatory region DNA binding; DNA-dependent ATPase activity; chromatin binding	nucleus; intracellular membrane-bounded organelle; nucleoplasm; intermediate filament cytoskeleton; SWI/SNF complex; nuclear chromatin; npBAF complex; nBAF complex
CDC42EP3	2.14177e-06	-0.258658	0.381	0.525	0.078391	Rho protein signal transduction; regulation of cell shape; positive regulation of actin filament polymerization; positive regulation of pseudopodium assembly; signal transduction	protein binding; GTP-Rho binding; cytoskeletal regulatory protein binding	cytoplasm; membrane; plasma membrane; actin cytoskeleton; cytoskeleton; cytosol; endomembrane system
H1FX	2.17211e-06	-0.262982	0.869	0.912	0.0795014	nucleosome assembly; regulation of transcription, DNA-templated; negative regulation of DNA recombination; nucleosome positioning; chromosome condensation; negative regulation of chromatin silencing	RNA binding; DNA binding; cadherin binding; double-stranded DNA binding; nucleosomal DNA binding	nucleus; nucleolus; nucleosome; chromosome
MXRA7	2.20249e-06	0.238598	0.39	0.279	0.0806134			membrane; integral component of membrane; collagen-containing extracellular matrix
PPP2R2B	2.24407e-06	-0.249174	0.149	0.275	0.0821354	apoptotic process; regulation of phosphoprotein phosphatase activity; mitotic cell cycle; peptidyl-serine dephosphorylation	protein binding; protein phosphatase regulator activity; protein serine/threonine phosphatase activity	cytoplasm; membrane; mitochondrion; cytoskeleton; mitochondrial outer membrane; protein phosphatase type 2A complex; cytosol
SNCAIP	2.36145e-06	-0.272196	0.204	0.336	0.0864316	cellular protein metabolic process; regulation of inclusion body assembly; cell death; dopamine metabolic process; regulation of neurotransmitter secretion	protein binding; identical protein binding; ubiquitin protein ligase binding	nucleoplasm; cytoplasmic ribonucleoprotein granule; cytoplasm; cytosol; presynaptic membrane; neuronal cell body; synaptic vesicle
FOXN3	2.61395e-06	-0.270451	0.39	0.542	0.0956731	regulation of transcription, DNA-templated; cell cycle; craniofacial suture morphogenesis; regulation of transcription by RNA polymerase II; negative regulation of transcription, DNA-templated; mitotic G2 DNA damage checkpoint	DNA binding; DNA-binding transcription factor activity; sequence-specific DNA binding; protein binding; DNA-binding transcription factor activity, RNA polymerase II-specific; protein C-terminus binding	nucleus; nuclear chromatin
RPS7	2.73679e-06	-0.132335	1	1	0.100169	translation; rRNA processing; ribosomal small subunit biogenesis; viral transcription; translational initiation; nuclear-transcribed mRNA catabolic process, nonsense-mediated decay; SRP-dependent cotranslational protein targeting to membrane; positive regulation of gene expression; protein stabilization; negative regulation of ubiquitin protein ligase activity; negative regulation of ubiquitin-de…	RNA binding; structural constituent of ribosome; protein binding; protein kinase binding; mRNA 3'-UTR binding; mRNA 5'-UTR binding; ubiquitin ligase inhibitor activity	nucleus; cytoplasm; membrane; ribosome; cytoskeleton; cytosolic small ribosomal subunit; nucleolus; focal adhesion; centrosome; microtubule organizing center; small-subunit processome; nucleoplasm; cytosol; protein-containing complex; ribonucleoprotein complex; intracellular; synapse
HDAC9	2.7833e-06	-0.247089	0.326	0.476	0.101872	positive regulation of cell migration involved in sprouting angiogenesis; cholesterol homeostasis; cellular response to insulin stimulus; chromatin organization; inflammatory response; histone deacetylation; B cell activation; negative regulation of transcription by RNA polymerase II; negative regulation of transcription, DNA-templated; heart development; B cell differentiation; negative regulati…	metal ion binding; hydrolase activity; protein binding; histone deacetylase activity; NAD-dependent histone deacetylase activity (H3-K14 specific); transcription factor binding; transcription corepressor activity; histone deacetylase binding; protein kinase C binding; repressing transcription factor binding; protein deacetylase activity; histone deacetylase activity (H4-K16 specific)	cytoplasm; nucleus; nucleoplasm; histone deacetylase complex; transcription factor complex; histone methyltransferase complex
NUFIP2	2.82585e-06	0.270719	0.695	0.605	0.103429		RNA binding; protein binding	nucleus; cytoplasm; membrane; cytosol; nucleoplasm; nuclear body; cytoplasmic stress granule; polysomal ribosome
AL391807.1	2.9787e-06	-0.244215	0.28	0.433	0.109023
EIF1B	3.01271e-06	0.235633	0.982	0.942	0.110268	translation; translational initiation; regulation of translational initiation	RNA binding; translation initiation factor activity; protein binding; ribosomal small subunit binding	eukaryotic 43S preinitiation complex
SLA	3.07371e-06	-0.351375	0.052	0.148	0.112501	positive regulation of signal transduction; regulation of signal transduction; cell differentiation; transmembrane receptor protein tyrosine kinase signaling pathway; regulation of cell population proliferation; peptidyl-tyrosine autophosphorylation	protein binding; SH3/SH2 adaptor activity; signaling receptor binding; non-membrane spanning protein tyrosine kinase activity	cytoplasm; endosome; extrinsic component of cytoplasmic side of plasma membrane
CALM3	3.08277e-06	0.276586	0.924	0.881	0.112833	phosphorylation; calcium-mediated signaling; regulation of release of sequestered calcium ion into cytosol by sarcoplasmic reticulum; regulation of cardiac muscle contraction by regulation of the release of sequestered calcium ion; regulation of heart rate; G protein-coupled receptor signaling pathway; G2/M transition of mitotic cell cycle; response to amphetamine; activation of adenylate cyclase…	metal ion binding; kinase activity; calcium ion binding; protein binding; adenylate cyclase binding; protein domain specific binding; nitric-oxide synthase regulator activity; type 3 metabotropic glutamate receptor binding; phosphatidylinositol 3-kinase binding; ion channel binding; protein N-terminus binding; calcium-dependent protein binding; nitric-oxide synthase binding; protein kinase bindin…	nucleus; cytoplasm; plasma membrane; cytoskeleton; spindle pole; centrosome; microtubule organizing center; spindle; voltage-gated potassium channel complex; growth cone; synaptic vesicle membrane; mitochondrial membrane; neuron projection; myelin sheath; spindle microtubule; protein-containing complex; vesicle; calcium channel complex; sarcomere; catalytic complex
SHB	3.47168e-06	-0.173613	0.11	0.231	0.127067	signal transduction; positive regulation of signal transduction; apoptotic process; multicellular organism development; cell differentiation; angiogenesis; vascular endothelial growth factor receptor signaling pathway	protein binding; SH3/SH2 adaptor activity; phosphotyrosine residue binding	cytoplasm; membrane; cytosol; nucleoplasm; plasma membrane; cytoplasmic ribonucleoprotein granule
FGFR3	3.51862e-06	-0.140135	0.043	0.137	0.128785	protein phosphorylation; phosphorylation; positive regulation of cell population proliferation; apoptotic process; fibroblast growth factor receptor signaling pathway; transmembrane receptor protein tyrosine kinase signaling pathway; MAPK cascade; positive regulation of MAPK cascade; bone morphogenesis; positive regulation of ERK1 and ERK2 cascade; skeletal system development; positive regulation…	nucleotide binding; protein kinase activity; ATP binding; kinase activity; transferase activity; protein tyrosine kinase activity; transmembrane receptor protein tyrosine kinase activity; protein binding; identical protein binding; fibroblast growth factor-activated receptor activity; fibroblast growth factor binding	membrane; integral component of membrane; endoplasmic reticulum; Golgi apparatus; plasma membrane; extracellular region; cytoplasmic vesicle; focal adhesion; integral component of plasma membrane; receptor complex; transport vesicle; nucleus; cytoplasm; cell surface
ATP2B2	3.52922e-06	-0.230057	0.125	0.245	0.129173	ion transport; calcium ion transport; calcium ion transmembrane transport; regulation of presynaptic cytosolic calcium ion concentration; ion transmembrane transport; sensory perception of sound; regulation of cardiac conduction; neuron differentiation; cellular calcium ion homeostasis; regulation of cytosolic calcium ion concentration; regulation of postsynaptic cytosolic calcium ion concentrati…	metal ion binding; nucleotide binding; ATP binding; protein binding; calcium transmembrane transporter activity, phosphorylative mechanism; calmodulin binding; PDZ domain binding; calcium-transporting ATPase activity involved in regulation of presynaptic cytosolic calcium ion concentration; calcium-transporting ATPase activity involved in regulation of postsynaptic cytosolic calcium ion concentra…	cytoplasm; membrane; integral component of membrane; presynapse; plasma membrane; cell junction; synapse; extracellular exosome; glutamatergic synapse; postsynaptic density membrane; GABA-ergic synapse
DYNC1H1	3.66667e-06	0.289282	0.866	0.815	0.134204	cell division; cell cycle; microtubule-based movement; mitotic cell cycle; cytoplasmic microtubule organization; G2/M transition of mitotic cell cycle; regulation of G2/M transition of mitotic cell cycle; ciliary basal body-plasma membrane docking; neutrophil degranulation; mitotic spindle organization; antigen processing and presentation of exogenous peptide antigen via MHC class II; endoplasmic…	RNA binding; nucleotide binding; ATP binding; motor activity; microtubule motor activity; protein binding; dynein light intermediate chain binding; dynein intermediate chain binding; ATP-dependent microtubule motor activity, minus-end-directed	cytoplasm; membrane; axon cytoplasm; cytoskeleton; microtubule; centrosome; dynein complex; extracellular region; cytoplasmic dynein complex; cytosol; extracellular exosome; cell cortex; cytoplasmic microtubule; azurophil granule lumen; filopodium
COX5A	3.79835e-06	0.228827	0.97	0.928	0.139023	proton transmembrane transport; mitochondrial electron transport, cytochrome c to oxygen; electron transport chain	metal ion binding; protein binding; cytochrome-c oxidase activity; electron transfer activity	membrane; mitochondrial inner membrane; mitochondrion; mitochondrial respiratory chain complex IV
OCIAD2	4.29047e-06	-0.258219	0.494	0.627	0.157035	response to bacterium		endosome
MAML3	4.33656e-06	0.290576	0.387	0.274	0.158723	Notch signaling pathway; positive regulation of transcription by RNA polymerase II; transcription initiation from RNA polymerase II promoter; positive regulation of transcription of Notch receptor target; positive regulation of Notch signaling pathway	transcription coactivator activity	nucleus; nuclear speck; nucleoplasm
ARF1	4.42943e-06	0.25667	0.832	0.802	0.162122	protein transport; positive regulation of catalytic activity; intracellular protein transport; vesicle-mediated transport; cellular response to virus; antigen processing and presentation of exogenous peptide antigen via MHC class II; interleukin-12-mediated signaling pathway; phosphatidylinositol biosynthetic process; regulation of defense response to virus by virus; cellular copper ion homeostas…	RNA binding; nucleotide binding; GTP binding; protein binding; protein domain specific binding; GTPase activity; protein heterodimerization activity; magnesium ion binding; GDP binding; phospholipase D activator activity	cytoplasm; membrane; Golgi apparatus; plasma membrane; perinuclear region of cytoplasm; cell junction; synapse; postsynaptic membrane; focal adhesion; cytosol; cell leading edge; extracellular exosome; postsynaptic density; neuron projection; protein-containing complex; Golgi membrane; late endosome; peroxisomal membrane; trans-Golgi network; endomembrane system; sarcomere; COPI-coated vesicle; g…
ATP1B3	4.46501e-06	-0.239054	0.799	0.863	0.163424	potassium ion transport; sodium ion transport; protein stabilization; ion transport; leukocyte migration; establishment or maintenance of transmembrane electrochemical gradient; potassium ion import across plasma membrane; ion transmembrane transport; positive regulation of sodium ion export across plasma membrane; regulation of cardiac conduction; cellular sodium ion homeostasis; cellular potass…	ATPase binding; sodium:potassium-exchanging ATPase activity; ATPase activator activity	plasma membrane; sodium:potassium-exchanging ATPase complex; membrane; integral component of membrane; melanosome; extracellular exosome; cytoplasm; caveola
PURPL	4.68682e-06	0.161769	0.125	0.052	0.171542
AC004540.2	4.75686e-06	0.128969	0.18	0.09	0.174106
SLC25A13	4.76585e-06	0.132623	0.14	0.063	0.174435	transmembrane transport; ATP biosynthetic process; gluconeogenesis; cellular respiration; response to calcium ion; L-glutamate transmembrane transport; aspartate transmembrane transport; malate-aspartate shuttle; L-aspartate transmembrane transport; mitochondrial transport	transmembrane transporter activity; metal ion binding; calcium ion binding; identical protein binding; L-glutamate transmembrane transporter activity; L-aspartate transmembrane transporter activity	membrane; integral component of membrane; mitochondrion; mitochondrial inner membrane; integral component of plasma membrane
BCAT1	4.82191e-06	0.145816	0.146	0.066	0.176487	cellular amino acid biosynthetic process; branched-chain amino acid metabolic process; branched-chain amino acid biosynthetic process; G1/S transition of mitotic cell cycle; branched-chain amino acid catabolic process; leucine biosynthetic process; valine biosynthetic process	transferase activity; catalytic activity; transaminase activity; branched-chain-amino-acid transaminase activity; L-leucine transaminase activity; L-valine transaminase activity; L-isoleucine transaminase activity; identical protein binding	cytoplasm; mitochondrion; cytosol
CREG2	4.93914e-06	0.183458	0.21	0.114	0.180777		cofactor binding	extracellular region; extracellular space; endoplasmic reticulum; Golgi apparatus
ADGRV1	5.01147e-06	0.230259	0.168	0.083	0.183425	G protein-coupled receptor signaling pathway; negative regulation of adenylate cyclase activity; signal transduction; cell surface receptor signaling pathway; cell communication; response to stimulus; nervous system development; visual perception; inner ear receptor cell stereocilium organization; regulation of protein stability; positive regulation of bone mineralization; cell-cell adhesion; cel…	G protein-coupled receptor activity; hydrolase activity; protein binding; transmembrane signaling receptor activity; G-protein alpha-subunit binding; adenylate cyclase inhibitor activity; calcium ion binding	integral component of membrane; membrane; plasma membrane; cell projection; extracellular exosome; photoreceptor inner segment; cell surface; stereocilium membrane; cytoplasm; receptor complex; stereocilia ankle link; stereocilia ankle link complex; periciliary membrane compartment; USH2 complex; stereocilium; synapse
TDG	5.13792e-06	-0.232354	0.448	0.603	0.188053	chromatin organization; DNA repair; cellular response to DNA damage stimulus; mismatch repair; base-excision repair; base-excision repair, AP site formation; depyrimidination; DNA demethylation; regulation of gene expression, epigenetic; regulation of embryonic development; negative regulation of transcription by RNA polymerase II; negative regulation of protein binding; oxidative DNA demethylati…	hydrolase activity; DNA binding; protein homodimerization activity; protein binding; DNA N-glycosylase activity; mismatched DNA binding; double-stranded DNA binding; damaged DNA binding; magnesium ion binding; SUMO binding; ATP binding; uracil DNA N-glycosylase activity; chloride ion binding; protein self-association; transcription coregulator activity; protein kinase C binding; transcription fac…	nucleus; nucleoplasm; plasma membrane; PML body
TWF2	5.17292e-06	-0.187677	0.116	0.23	0.189334	negative regulation of actin filament polymerization; sequestering of actin monomers; cell projection organization; positive regulation of neuron projection development; cellular response to growth factor stimulus; actin filament depolymerization; positive regulation of axon extension; regulation of actin cytoskeleton organization; positive regulation of lamellipodium assembly; cellular response …	RNA binding; ATP binding; actin binding; protein binding; actin monomer binding; actin filament binding; cadherin binding; protein kinase C binding; phosphatidylinositol-4,5-bisphosphate binding	perinuclear region of cytoplasm; cytoplasm; cytoskeleton; cell projection; extracellular exosome; stereocilium; actin filament; lamellipodium; filopodium; myofibril; growth cone; intracellular
R3HDM2	5.27243e-06	-0.180401	0.299	0.447	0.192976		nucleic acid binding; RNA binding	nucleus
KCNG1	5.29936e-06	-0.192617	0.076	0.183	0.193962	transmembrane transport; ion transport; potassium ion transport; regulation of ion transmembrane transport; protein homooligomerization; potassium ion transmembrane transport; regulation of delayed rectifier potassium channel activity	ion channel activity; voltage-gated ion channel activity; voltage-gated potassium channel activity; potassium channel activity; delayed rectifier potassium channel activity; protein binding	membrane; integral component of membrane; voltage-gated potassium channel complex; plasma membrane
ZNF467	5.39889e-06	-0.152441	0.125	0.252	0.197605	regulation of transcription, DNA-templated	nucleic acid binding; metal ion binding; DNA binding	nucleus
SFRP1	5.40011e-06	-0.180319	0.655	0.799	0.197649	negative regulation of cell population proliferation; negative regulation of canonical Wnt signaling pathway; negative regulation of fibroblast proliferation; negative regulation of apoptotic process; proteolysis; multicellular organism development; Wnt signaling pathway; cell differentiation; positive regulation of Wnt signaling pathway; positive regulation of transcription, DNA-templated; canon…	protein binding; heparin binding; Wnt-protein binding; drug binding; frizzled binding; identical protein binding; cysteine-type endopeptidase activity	extracellular space; cytosol; plasma membrane; extracellular region; cell surface; extracellular exosome; collagen-containing extracellular matrix
COX7B	5.55589e-06	0.210965	0.973	0.94	0.203351	proton transmembrane transport; electron transport chain; mitochondrial electron transport, cytochrome c to oxygen; central nervous system development	cytochrome-c oxidase activity	membrane; integral component of membrane; mitochondrial respirasome; mitochondrial inner membrane; mitochondrion; respiratory chain complex IV
RPS15A	5.74355e-06	-0.106176	1	1	0.21022	translation; response to virus; viral transcription; positive regulation of cell population proliferation; translational initiation; positive regulation of cell cycle; nuclear-transcribed mRNA catabolic process, nonsense-mediated decay; SRP-dependent cotranslational protein targeting to membrane	RNA binding; structural constituent of ribosome; protein binding	cytoplasm; membrane; ribosome; cytosolic small ribosomal subunit; nucleoplasm; cytosol; extracellular exosome
EMP3	5.83367e-06	-0.195459	0.049	0.14	0.213518	cell growth; cell death; bleb assembly	protein binding	membrane; integral component of membrane; plasma membrane
IFI44	5.87366e-06	-0.233979	0.134	0.25	0.214982	immune response; response to virus; response to bacterium		cytoplasm
C20orf96	6.04265e-06	0.173307	0.204	0.113	0.221167
CCNG1	6.69573e-06	0.262531	0.567	0.458	0.245071	protein phosphorylation; cell division; cell cycle; regulation of cell cycle; regulation of cyclin-dependent protein serine/threonine kinase activity; mitotic cell cycle phase transition	protein binding; protein kinase binding; protein kinase activity; cyclin-dependent protein serine/threonine kinase regulator activity	nucleus; cytoplasm; nucleoplasm; cyclin-dependent protein kinase holoenzyme complex
ANK2	7.08868e-06	0.262665	0.393	0.282	0.259453	signal transduction; positive regulation of gene expression; protein stabilization; regulation of cardiac muscle contraction by regulation of the release of sequestered calcium ion; regulation of ventricular cardiac muscle cell membrane repolarization; regulation of heart rate; protein transport; cytoskeleton organization; endocytosis; endoplasmic reticulum to Golgi vesicle-mediated transport; pr…	protein binding; ion channel binding; enzyme binding; ATPase binding; protein kinase binding; protein binding, bridging; phosphorylation-dependent protein binding; spectrin binding; structural constituent of cytoskeleton	cytoplasm; membrane; mitochondrion; plasma membrane; cytoskeleton; cell junction; synapse; postsynaptic membrane; lysosome; endosome; early endosome; cytosol; basolateral plasma membrane; recycling endosome; M band; apical plasma membrane; Z disc; T-tubule; sarcolemma; axon initial segment; intercalated disc; A band; costamere; neuron projection; membrane raft
PPME1	7.13478e-06	0.227475	0.503	0.371	0.26114	negative regulation of phosphoprotein phosphatase activity; regulation of phosphoprotein phosphatase activity; protein demethylation; G2/M transition of mitotic cell cycle	hydrolase activity; protein binding; carboxylic ester hydrolase activity; protein methylesterase activity; cadherin binding; protein phosphatase inhibitor activity; protein phosphatase regulator activity; protein phosphatase 2A binding; protein phosphatase binding; protein C-terminal methylesterase activity; protein kinase binding	nucleoplasm
AC090204.1	7.22933e-06	0.190119	0.232	0.133	0.264601
SOX2-OT	7.64111e-06	0.287904	0.14	0.064	0.279672
PIP4P2	7.74579e-06	0.222274	0.409	0.297	0.283504	phosphatidylinositol dephosphorylation; negative regulation of phagocytosis	hydrolase activity; phosphatidylinositol-4,5-bisphosphate 4-phosphatase activity	membrane; integral component of membrane; lysosomal membrane; plasma membrane; cytoplasmic vesicle; lysosome; endosome; late endosome membrane; phagocytic vesicle membrane
KDM6B	8.64572e-06	-0.234365	0.396	0.525	0.316442	positive regulation of transcription by RNA polymerase II; mesodermal cell differentiation; oxidation-reduction process; chromatin organization; inflammatory response; histone H3-K27 demethylation; positive regulation of cold-induced thermogenesis; inflammatory response to antigenic stimulus; chromatin remodeling; regulation of gene expression; response to activity; histone demethylation; hippoca…	metal ion binding; oxidoreductase activity; protein binding; dioxygenase activity; sequence-specific DNA binding; histone demethylase activity (H3-K27 specific); RNA polymerase II proximal promoter sequence-specific DNA binding; chromatin DNA binding; chromatin binding; beta-catenin binding	nucleus; nuclear chromatin; nucleoplasm; MLL3/4 complex
ROBO1	9.34966e-06	0.238055	0.457	0.333	0.342207	positive regulation of gene expression; negative regulation of gene expression; ventricular septum morphogenesis; axon guidance; multicellular organism development; cell differentiation; chemotaxis; axon midline choice point recognition; Roundabout signaling pathway; nervous system development; cell adhesion; aorta development; homophilic cell adhesion via plasma membrane adhesion molecules; acti…	protein binding; axon guidance receptor activity; identical protein binding; LRR domain binding	cytoplasm; membrane; integral component of membrane; plasma membrane; cell projection; cell surface; axon; integral component of plasma membrane; endoplasmic reticulum-Golgi intermediate compartment membrane
CHD3	9.81731e-06	-0.239578	0.427	0.576	0.359323	chromatin organization; DNA duplex unwinding; centrosome cycle; regulation of transcription, DNA-templated; regulation of signal transduction by p53 class mediator; regulation of transcription by RNA polymerase II; spindle organization; ATP-dependent chromatin remodeling; chromatin assembly or disassembly	RNA binding; metal ion binding; nucleotide binding; ATP binding; hydrolase activity; zinc ion binding; DNA binding; protein binding; DNA helicase activity; helicase activity; ATPase activity; double-stranded DNA helicase activity; nucleosome-dependent ATPase activity	nucleus; cytoplasm; nucleolus; cytoskeleton; microtubule organizing center; centrosome; nucleoplasm; NuRD complex
VPS28	9.98392e-06	-0.208408	0.689	0.801	0.365421	protein transport; endosome transport via multivesicular body sorting pathway; endosomal transport; macroautophagy; viral life cycle; multivesicular body assembly; viral budding via host ESCRT complex; intracellular transport of virus; negative regulation of protein ubiquitination; ubiquitin-dependent protein catabolic process via the multivesicular body sorting pathway; positive regulation of pr…	protein binding; ubiquitin binding; protein-containing complex binding	cytoplasm; membrane; plasma membrane; ESCRT I complex; endosome; early endosome; late endosome membrane; extracellular exosome; endosome membrane; host cell; cytosol
C12orf57	1.13422e-05	-0.197331	0.948	0.962	0.415136	cognition; post-embryonic development; regulation of skeletal muscle contraction; corpus callosum morphogenesis; third ventricle development; psychomotor behavior; camera-type eye morphogenesis		cytoplasm; nuclear speck
RPL41	1.16227e-05	-0.126041	1	1	0.425402	translation; cytoplasmic translation; viral transcription; translational initiation; nuclear-transcribed mRNA catabolic process, nonsense-mediated decay; SRP-dependent cotranslational protein targeting to membrane	structural constituent of ribosome; RNA binding; mRNA 3'-UTR binding; mRNA 5'-UTR binding	ribosome; cytosol; cytosolic large ribosomal subunit; polysomal ribosome
TTC39B	1.19735e-05	-0.122545	0.04	0.127	0.438243	lipid metabolic process; cholesterol homeostasis; regulation of cholesterol metabolic process; negative regulation of cholesterol storage; regulation of cholesterol efflux	protein binding
HNRNPC	1.21571e-05	0.175719	0.97	0.967	0.444962	mRNA processing; RNA splicing; mRNA splicing, via spliceosome; RNA metabolic process; osteoblast differentiation; ATP-dependent chromatin remodeling; negative regulation of telomere maintenance via telomerase; 3'-UTR-mediated mRNA stabilization	nucleic acid binding; RNA binding; protein binding; identical protein binding; RNA polymerase II distal enhancer sequence-specific DNA binding; mRNA 3'-UTR binding; RNA polymerase II proximal promoter sequence-specific DNA binding; telomerase RNA binding; nucleosomal DNA binding; poly(U) RNA binding; N6-methyladenosine-containing RNA binding	nucleus; membrane; nucleoplasm; nuclear chromatin; cytosol; spliceosomal complex; catalytic step 2 spliceosome; extracellular exosome; protein-containing complex; telomerase holoenzyme complex; actin cytoskeleton; extracellular region
LRRN3	1.2287e-05	0.263917	0.226	0.13	0.449717	positive regulation of synapse assembly	protein binding	membrane; integral component of membrane; extracellular space; extracellular matrix
COX7A2	1.24388e-05	0.174466	0.988	0.985	0.455272	proton transmembrane transport; electron transport chain	electron transfer activity; cytochrome-c oxidase activity	membrane; integral component of membrane; mitochondrial respirasome
RAP1B	1.24797e-05	0.281049	0.604	0.541	0.456769	signal transduction; small GTPase mediated signal transduction; cell population proliferation; response to carbohydrate; Rap protein signal transduction; cellular response to drug; negative regulation of calcium ion-dependent exocytosis; positive regulation of ERK1 and ERK2 cascade; cellular response to organic cyclic compound; cellular response to gonadotropin-releasing hormone; negative regulat…	nucleotide binding; GTPase activity; GTP binding; protein binding; GDP binding; protein-containing complex binding	cytoplasm; membrane; cytosol; plasma membrane; cell junction; extracellular exosome; azurophil granule membrane; cell-cell junction; lipid droplet; intracellular
ARL4C	1.27404e-05	-0.242373	0.186	0.307	0.46631	intracellular protein transport; vesicle-mediated transport; endocytic recycling	nucleotide binding; GTP binding; protein binding; alpha-tubulin binding; GTPase activity	cytoplasm; membrane; cytosol; plasma membrane; cell projection; filopodium; nucleus
PLCB1	1.27772e-05	-0.219748	0.216	0.341	0.467657	intracellular signal transduction; signal transduction; lipid metabolic process; lipid catabolic process; regulation of cell cycle; brain development; positive regulation of G1/S transition of mitotic cell cycle; positive regulation of transcription, DNA-templated; positive regulation of GTPase activity; G protein-coupled receptor signaling pathway; memory; positive regulation of interleukin-12 p…	hydrolase activity; calcium ion binding; phosphoric diester hydrolase activity; phosphatidylinositol phospholipase C activity; protein binding; calmodulin binding; protein homodimerization activity; enzyme binding; GTPase activator activity; phospholipase C activity; phosphatidylinositol-4,5-bisphosphate binding; lamin binding	nucleus; cytoplasm; membrane; postsynapse; cytosol; extracellular exosome; nuclear membrane; nuclear speck; nuclear chromatin; protein-containing complex; glutamatergic synapse; GABA-ergic synapse
SYNE2	1.32536e-05	-0.24367	0.808	0.88	0.485095	cytoskeletal anchoring at nuclear membrane; positive regulation of cell migration; nuclear migration; centrosome localization; nuclear migration along microfilament; nucleokinesis involved in cell motility in cerebral cortex radial glia guided migration; regulation of cilium assembly	actin binding; actin filament binding; protein binding	nucleus; cytoplasm; membrane; integral component of membrane; mitochondrion; nuclear membrane; intermediate filament cytoskeleton; plasma membrane; cytoskeleton; aggresome; meiotic nuclear membrane microtubule tethering complex; cell junction; nucleoplasm; focal adhesion; nuclear envelope; extracellular exosome; sarcoplasmic reticulum; Z disc; sarcoplasmic reticulum membrane; filopodium membrane;…
CALD1	1.36368e-05	-0.337526	0.427	0.542	0.499121	muscle contraction	actin binding; protein binding; calmodulin binding; myosin binding; cadherin binding; tropomyosin binding	cytoplasm; intracellular membrane-bounded organelle; plasma membrane; actin cytoskeleton; cytoskeleton; cytosol; myofibril; membrane; actin cap
ABAT	1.37827e-05	0.232351	0.341	0.237	0.504459	gamma-aminobutyric acid catabolic process; gamma-aminobutyric acid metabolic process; neurotransmitter catabolic process; behavioral response to cocaine; response to hypoxia; aging; copulation; locomotory behavior; gamma-aminobutyric acid biosynthetic process; response to iron ion; negative regulation of gamma-aminobutyric acid secretion; cerebellum development; positive regulation of heat genera…	metal ion binding; transferase activity; catalytic activity; protein homodimerization activity; transaminase activity; pyridoxal phosphate binding; iron-sulfur cluster binding; 4-aminobutyrate transaminase activity; succinate-semialdehyde dehydrogenase binding; 4-aminobutyrate:2-oxoglutarate transaminase activity; (S)-3-amino-2-methylpropionate transaminase activity	mitochondrion; mitochondrial matrix; 4-aminobutyrate transaminase complex; neuron projection
NELL2	1.49039e-05	-0.218211	0.195	0.319	0.545496	neuron cellular homeostasis	calcium ion binding; protein binding; heparin binding; protein kinase C binding	extracellular region; cytoplasm
KMT2E	1.50198e-05	0.219509	0.915	0.892	0.549738	chromatin organization; cell cycle; erythrocyte differentiation; positive regulation of transcription, DNA-templated; histone lysine methylation; cell cycle arrest; positive regulation of G1/S transition of mitotic cell cycle; regulation of megakaryocyte differentiation; DNA methylation; neutrophil activation; neutrophil mediated immunity; positive regulation of histone H3-K4 trimethylation	metal ion binding; protein binding; enzyme binding; methylated histone binding	nucleus; cytoplasm; nuclear speck; membrane; chromosome; plasma membrane; cytoskeleton; nucleoplasm; microtubule organizing center; protein-containing complex; chromatin; transcriptionally active chromatin
CNTNAP2	1.52975e-05	-0.148771	0.39	0.533	0.559903	cell adhesion; protein localization to juxtaparanode region of axon; neuron projection morphogenesis; cerebral cortex development; transmission of nerve impulse; brain development; neuron projection development; learning; social behavior; superior temporal gyrus development; adult behavior; vocalization behavior; clustering of voltage-gated potassium channels; striatum development; vocal learning…	protein binding; enzyme binding	membrane; integral component of membrane; cell projection; cell junction; axon; cell surface; early endosome; voltage-gated potassium channel complex; Golgi apparatus; dendrite; neuronal cell body; perikaryon; paranodal junction; juxtaparanode region of axon; axolemma
MYADM	1.5663e-05	0.133675	0.177	0.092	0.573282	positive regulation of cell migration; negative regulation of gene expression; negative regulation of protein phosphorylation; establishment of endothelial barrier; protein localization to plasma membrane; membrane raft organization; negative regulation of actin filament polymerization; negative regulation of heterotypic cell-cell adhesion; negative regulation of protein kinase C signaling		membrane; integral component of membrane; plasma membrane; membrane raft; cell-cell junction; ruffle; cortical actin cytoskeleton
KIF21A	1.61712e-05	-0.207849	0.771	0.869	0.591881	microtubule-based movement	nucleotide binding; ATP binding; motor activity; microtubule motor activity; microtubule binding; protein binding; ATPase activity	cytosol; plasma membrane; cytoplasm; cytoskeleton; microtubule; kinesin complex
UNC5A	1.69275e-05	-0.143877	0.027	0.103	0.619565	signal transduction; apoptotic process; multicellular organism development; netrin-activated signaling pathway; axon guidance; neuron projection development; anterior/posterior axon guidance	netrin receptor activity; protein binding	membrane; integral component of membrane; plasma membrane; cell projection; membrane raft; intrinsic component of plasma membrane; neuronal cell body membrane; neuron projection membrane
DUBR	1.69277e-05	-0.159259	0.088	0.192	0.619571
ANK3	1.70095e-05	0.384855	0.561	0.483	0.622566	positive regulation of gene expression; signal transduction; endoplasmic reticulum to Golgi vesicle-mediated transport; neuromuscular junction development; protein localization to plasma membrane; positive regulation of homotypic cell-cell adhesion; establishment of protein localization; cytoskeletal anchoring at plasma membrane; neuronal action potential; cellular response to magnesium ion; posi…	protein binding; ion channel binding; cadherin binding; protein binding, bridging; cytoskeletal protein binding; structural constituent of cytoskeleton; spectrin binding	cytoplasm; membrane; Golgi apparatus; plasma membrane; cytoskeleton; cell projection; cell junction; synapse; postsynaptic membrane; lysosome; axon; cytosol; sarcolemma; basolateral plasma membrane; cell surface; endoplasmic reticulum; T-tubule; lateral plasma membrane; sarcoplasmic reticulum; Z disc; node of Ranvier; axon initial segment; dendrite; intercalated disc; spectrin-associated cytoskel…
PODXL2	1.71343e-05	-0.23523	0.357	0.485	0.627131	cell adhesion; leukocyte tethering or rolling	protein binding; glycosaminoglycan binding	membrane; integral component of membrane; integral component of plasma membrane; Golgi lumen
PEG10	1.94436e-05	0.488407	0.802	0.748	0.711656	apoptotic process; cell differentiation; negative regulation of transforming growth factor beta receptor signaling pathway; placenta development	nucleic acid binding; RNA binding; zinc ion binding; metal ion binding; DNA binding; protein binding	nucleus; cytoplasm; cytosol
NT5DC1	1.96016e-05	0.128886	0.119	0.053	0.717438	dephosphorylation	metal ion binding; hydrolase activity; 5'-nucleotidase activity
GPR137C	1.99324e-05	0.137573	0.116	0.051	0.729545			membrane; integral component of membrane
STRA6	2.05697e-05	-0.126039	0.037	0.117	0.752871	retinoid metabolic process; embryonic digestive tract development; camera-type eye development; blood vessel development; heart development; lung development; lung vasculature development; ductus arteriosus closure; kidney development; pulmonary valve morphogenesis; ventricular septum development; learning; feeding behavior; adrenal gland development; female genitalia development; retinol transpo…	signaling receptor activity; retinol transmembrane transporter activity; retinal binding; retinol binding	membrane; integral component of membrane; plasma membrane; integral component of plasma membrane; protein-containing complex
LINC00632	2.07541e-05	0.228327	0.741	0.686	0.759621
PRKACA	2.10499e-05	0.16623	0.21	0.121	0.770447	regulation of cardiac muscle contraction by regulation of the release of sequestered calcium ion; regulation of heart rate; mRNA processing; protein phosphorylation; phosphorylation; mesoderm formation; neural tube closure; protein kinase A signaling; peptidyl-serine phosphorylation; peptidyl-threonine phosphorylation; protein autophosphorylation; positive regulation of protein export from nucleu…	nucleotide binding; protein kinase activity; protein serine/threonine kinase activity; ATP binding; kinase activity; transferase activity; protein binding; magnesium ion binding; cAMP-dependent protein kinase activity; protein domain specific binding; manganese ion binding; protein kinase A regulatory subunit binding; protein kinase binding; ubiquitin protein ligase binding; protein serine/threon…	nucleus; cytoplasm; nuclear speck; membrane; cytosol; motile cilium; mitochondrion; intercellular bridge; plasma membrane; cell projection; perinuclear region of cytoplasm; cytoplasmic vesicle; acrosomal vesicle; cAMP-dependent protein kinase complex; neuromuscular junction; sperm flagellum; dendritic spine; ciliary base; centrosome; cilium; nucleoplasm; extracellular exosome; axoneme; calcium ch…
PON2	2.15874e-05	0.188012	0.204	0.116	0.790122	lipoxygenase pathway; response to toxic substance; aromatic compound catabolic process; response to oxidative stress	arylesterase activity; metal ion binding; hydrolase activity; identical protein binding; acyl-L-homoserine-lactone lactonohydrolase activity	extracellular region; membrane; plasma membrane; integral component of membrane; nucleus; mitochondrion; lysosome; intracellular membrane-bounded organelle
CEMIP2	2.21087e-05	0.134704	0.177	0.093	0.809201	metabolic process; multicellular organism development; angiogenesis; hyaluronan catabolic process; regulation of sprouting angiogenesis	hydrolase activity; hydrolase activity, acting on glycosyl bonds; hyalurononglucosaminidase activity; calcium ion binding; cadherin binding	membrane; integral component of membrane; plasma membrane; integral component of plasma membrane; extracellular exosome
DARS	2.36126e-05	0.261205	0.515	0.426	0.864246	translation; tRNA aminoacylation for protein translation; aspartyl-tRNA aminoacylation; protein-containing complex assembly	nucleic acid binding; RNA binding; nucleotide binding; ATP binding; ligase activity; protein binding; aminoacyl-tRNA ligase activity; aspartate-tRNA ligase activity; aminoacylase activity	cytoplasm; membrane; cytosol; aminoacyl-tRNA synthetase multienzyme complex; synapse; extracellular exosome
LEMD1	2.3721e-05	0.182293	0.229	0.137	0.868213			membrane; integral component of membrane
PAK1	2.39085e-05	-0.290326	0.299	0.417	0.875074	positive regulation of cell population proliferation; protein phosphorylation; phosphorylation; exocytosis; metabolic process; cellular response to DNA damage stimulus; apoptotic process; Fc-epsilon receptor signaling pathway; Fc-gamma receptor signaling pathway involved in phagocytosis; T cell receptor signaling pathway; neuron projection morphogenesis; positive regulation of protein phosphoryla…	nucleotide binding; protein kinase activity; protein serine/threonine kinase activity; ATP binding; kinase activity; transferase activity; protein binding; catalytic activity; collagen binding; Rac GTPase binding; protein kinase binding	nucleus; cytoplasm; membrane; cytosol; plasma membrane; chromosome; cell projection; cell junction; nucleoplasm; focal adhesion; dendrite; axon; ruffle membrane; protein-containing complex; nuclear membrane; invadopodium; Z disc; ruffle; intercalated disc; cell-cell junction; actin filament; lamellipodium
TMEM259	2.47062e-05	-0.193244	0.271	0.399	0.904273	response to endoplasmic reticulum stress; negative regulation of neuron death; positive regulation of ERAD pathway		membrane; integral component of membrane; endoplasmic reticulum; endoplasmic reticulum membrane
WIPI1	2.51346e-05	0.165456	0.235	0.139	0.919952	autophagy; autophagosome assembly; autophagy of mitochondrion; cellular response to starvation; IRE1-mediated unfolded protein response; macroautophagy; protein localization to phagophore assembly site; protein lipidation; vesicle targeting, trans-Golgi to endosome	phosphatidylinositol-3-phosphate binding; lipid binding; protein binding; phosphatidylinositol-3,5-bisphosphate binding; estrogen receptor binding; androgen receptor binding; signaling receptor binding	cytoplasm; membrane; Golgi apparatus; cytoskeleton; cytoplasmic vesicle; endosome; clathrin-coated vesicle; cytosol; phagophore assembly site membrane; autophagosome membrane; trans-Golgi network; endosome membrane; extrinsic component of membrane; Golgi membrane; phagophore assembly site
PCYOX1	2.53008e-05	0.157029	0.302	0.197	0.926033	oxidation-reduction process; prenylcysteine catabolic process; chloride transmembrane transport; prenylated protein catabolic process; chloride transport	prenylcysteine oxidase activity; oxidoreductase activity, acting on a sulfur group of donors, oxygen as acceptor; oxidoreductase activity; ATPase-coupled chloride transmembrane transporter activity	lysosome; extracellular exosome; very-low-density lipoprotein particle; plasma membrane
ARPC3	2.54364e-05	0.213141	0.915	0.919	0.930999	regulation of actin filament polymerization; Arp2/3 complex-mediated actin nucleation; Fc-gamma receptor signaling pathway involved in phagocytosis; membrane organization; ephrin receptor signaling pathway; actin polymerization-dependent cell motility; cellular response to nerve growth factor stimulus	actin binding; protein binding; actin filament binding; structural constituent of cytoskeleton	nucleus; cytoplasm; membrane; cytoskeleton; cell projection; Arp2/3 protein complex; focal adhesion; cytosol; lamellipodium; extracellular exosome; site of double-strand break; actin cytoskeleton; cell leading edge; filamentous actin; growth cone leading edge
CPE	2.82243e-05	-0.185772	0.921	0.96	1	proteolysis; neuropeptide signaling pathway; insulin processing; peptide hormone secretion; protein localization to secretory granule; cellular protein modification process; peptide metabolic process; protein processing; cardiac left ventricle morphogenesis; Wnt signaling pathway; protein localization to membrane	zinc ion binding; metallocarboxypeptidase activity; metal ion binding; hydrolase activity; peptidase activity; metallopeptidase activity; carboxypeptidase activity; cell adhesion molecule binding; neurexin family protein binding	nucleus; membrane; extracellular region; cytoplasmic vesicle; extracellular space; secretory granule membrane; extracellular exosome; plasma membrane; transport vesicle; transport vesicle membrane; Golgi apparatus
CREBRF	2.83015e-05	0.200763	0.442	0.324	1	regulation of transcription, DNA-templated; response to unfolded protein; positive regulation of transcription by RNA polymerase II; endoplasmic reticulum unfolded protein response; maternal behavior; negative regulation of glucocorticoid mediated signaling pathway; positive regulation of prolactin signaling pathway	DNA-binding transcription factor activity; protein binding; DNA-binding transcription factor activity, RNA polymerase II-specific; DNA-binding transcription activator activity, RNA polymerase II-specific; RNA polymerase II regulatory region sequence-specific DNA binding	nucleus; nucleoplasm; nuclear body
LINC00511	2.85565e-05	-0.14427	0.061	0.149	1
ARPP19	2.9238e-05	0.280467	0.674	0.627	1	cell division; negative regulation of phosphoprotein phosphatase activity; cell cycle; negative regulation of catalytic activity; regulation of phosphoprotein phosphatase activity; mitotic cell cycle; G2/M transition of mitotic cell cycle; negative regulation of protein dephosphorylation; positive regulation of glucose import; positive regulation of gluconeogenesis; dopamine receptor signaling pa…	protein phosphatase regulator activity; protein phosphatase inhibitor activity; potassium channel regulator activity; signaling receptor binding; phosphatase inhibitor activity; protein phosphatase 2A binding	cytoplasm; nucleoplasm
SCAMP1	2.98864e-05	0.216017	0.5	0.39	1	protein transport; neutrophil degranulation; post-Golgi vesicle-mediated transport; exocytosis	protein binding	membrane; integral component of membrane; Golgi apparatus; plasma membrane; endosome; Golgi membrane; trans-Golgi network; recycling endosome membrane; specific granule membrane; trans-Golgi network membrane; clathrin-coated vesicle; cytoplasmic vesicle membrane; synaptic vesicle membrane; zymogen granule membrane; synapse
CST3	3.16724e-05	-0.243819	0.485	0.599	1	negative regulation of endopeptidase activity; negative regulation of peptidase activity; cellular protein metabolic process; post-translational protein modification; neutrophil degranulation; supramolecular fiber organization; defense response; negative regulation of collagen catabolic process; negative regulation of extracellular matrix disassembly; regulation of tissue remodeling; negative reg…	identical protein binding; cysteine-type endopeptidase inhibitor activity; protein binding; peptidase inhibitor activity; protease binding; amyloid-beta binding; endopeptidase inhibitor activity	extracellular space; plasma membrane; extracellular region; extracellular exosome; ficolin-1-rich granule lumen; endoplasmic reticulum lumen; endoplasmic reticulum; tertiary granule lumen; Golgi apparatus
THRA	3.30689e-05	-0.247678	0.497	0.639	1	regulation of transcription, DNA-templated; intracellular receptor signaling pathway; steroid hormone mediated signaling pathway; animal organ morphogenesis; cell differentiation; positive regulation of transcription by RNA polymerase II; negative regulation of transcription by RNA polymerase II; transcription by RNA polymerase II; hormone-mediated signaling pathway; multicellular organism develo…	zinc ion binding; DNA-binding transcription factor activity; sequence-specific DNA binding; metal ion binding; DNA binding; nuclear receptor activity; transcription regulatory region DNA binding; protein binding; steroid hormone receptor activity; DNA-binding transcription factor activity, RNA polymerase II-specific; RNA polymerase II regulatory region sequence-specific DNA binding; transcription…	nucleus; cytoplasm; cytosol; nuclear chromatin; nucleoplasm; RNA polymerase II transcription factor complex
EMC10	3.36571e-05	-0.176476	0.204	0.33	1	angiogenesis; positive regulation of angiogenesis; positive regulation of endothelial cell migration; positive regulation of p38MAPK cascade; positive regulation of endothelial cell proliferation		membrane; integral component of membrane; extracellular region; ER membrane protein complex
SOBP	3.39885e-05	0.173674	0.256	0.16	1	sensory perception of sound; locomotory behavior; inner ear morphogenesis; cognition; cochlea development	metal ion binding; SUMO polymer binding	nucleus
NCKAP5	3.46265e-05	-0.124098	0.088	0.188	1	microtubule depolymerization; microtubule bundle formation		microtubule plus-end
NOVA2	3.49531e-05	0.218448	0.448	0.344	1	mRNA splicing, via spliceosome; negative regulation of cold-induced thermogenesis; regulation of RNA metabolic process	nucleic acid binding; RNA binding	nucleus
TRIM59	3.54222e-05	-0.176642	0.155	0.267	1	protein ubiquitination; innate immune response; negative regulation of I-kappaB kinase/NF-kappaB signaling	zinc ion binding; metal ion binding; protein binding	membrane; integral component of membrane; endoplasmic reticulum; endoplasmic reticulum membrane
POP5	3.72893e-05	-0.169839	0.238	0.369	1	tRNA processing; RNA metabolic process; RNA phosphodiester bond hydrolysis; RNA phosphodiester bond hydrolysis, endonucleolytic; rRNA processing; tRNA 5'-leader removal	RNA binding; hydrolase activity; protein binding; ribonuclease activity; ribonuclease P activity; ribonuclease P RNA binding	nucleus; nucleolus; nucleoplasm; ribonuclease MRP complex; multimeric ribonuclease P complex; nucleolar ribonuclease P complex
AAMDC	3.92225e-05	-0.181249	0.152	0.262	1	positive regulation of fat cell differentiation	protein binding	cytoplasm
CYFIP1	3.978e-05	-0.168352	0.091	0.184	1	multicellular organism development; cell differentiation; Fc-gamma receptor signaling pathway involved in phagocytosis; nervous system development; axon guidance; neutrophil degranulation; regulation of cell shape; lamellipodium assembly; vascular endothelial growth factor receptor signaling pathway; cognition; positive regulation of Arp2/3 complex-mediated actin nucleation; cell morphogenesis; r…	actin binding; protein binding; actin filament binding; RNA 7-methylguanosine cap binding; Rac GTPase binding; translation regulator activity	cytoplasm; cell projection; perinuclear region of cytoplasm; cell junction; synapse; focal adhesion; extracellular region; neuron projection; cytosol; lamellipodium; extracellular exosome; mRNA cap binding complex; ruffle; secretory granule lumen; specific granule lumen; tertiary granule lumen; SCAR complex; filopodium tip; neuronal cell body; terminal bouton; dendritic spine; dendritic growth co…
SPTBN1	4.063e-05	-0.183275	0.152	0.262	1	actin filament capping; cytoskeleton organization; MAPK cascade; common-partner SMAD protein phosphorylation; regulation of SMAD protein signal transduction; protein localization to plasma membrane; axon guidance; endoplasmic reticulum to Golgi vesicle-mediated transport; regulation of protein localization to plasma membrane; positive regulation of protein localization to plasma membrane; plasma …	RNA binding; actin binding; protein binding; structural constituent of cytoskeleton; phospholipid binding; calmodulin binding; cadherin binding; protein-containing complex binding; ankyrin binding; GTPase binding	cytoplasm; membrane; plasma membrane; cytoskeleton; spectrin; cytosol; extracellular exosome; M band; nucleus; postsynaptic density; axolemma; cortical cytoskeleton; cuticular plate; protein-containing complex; postsynapse; glutamatergic synapse; nucleolus; spectrin-associated cytoskeleton
NOL4	4.24026e-05	-0.176605	0.076	0.165	1		RNA binding	nucleus; nucleolus
PGAP2	4.30263e-05	-0.152445	0.088	0.184	1	GPI anchor biosynthetic process	protein binding	membrane; integral component of membrane; Golgi membrane; endoplasmic reticulum; endoplasmic reticulum membrane; Golgi apparatus
ZBTB20	4.31931e-05	0.234312	0.619	0.539	1	positive regulation of glycolytic process; positive regulation of lipid biosynthetic process; lipid homeostasis; cellular response to glucose stimulus; negative regulation of transcription by RNA polymerase II; negative regulation of gene expression; positive regulation of interferon-beta production; positive regulation of interleukin-6 production; positive regulation of tumor necrosis factor pro…	nucleic acid binding; metal ion binding; DNA binding; RNA polymerase II regulatory region sequence-specific DNA binding; DNA-binding transcription repressor activity, RNA polymerase II-specific; transcription regulatory region DNA binding; protein binding	nucleus; cytoplasm; nucleoplasm; nuclear body
UPF3A	4.40182e-05	-0.197157	0.61	0.723	1	mRNA transport; positive regulation of translation; nucleocytoplasmic transport; nuclear-transcribed mRNA catabolic process, nonsense-mediated decay	nucleic acid binding; RNA binding; protein binding; structural constituent of nuclear pore; telomeric DNA binding	nucleus; cytoplasm; intracellular membrane-bounded organelle; cytosol; nucleolus; exon-exon junction complex
SH3GLB1	4.42851e-05	0.211036	0.39	0.285	1	apoptotic process; autophagy; positive regulation of autophagy; protein complex oligomerization; positive regulation of protein oligomerization; positive regulation of protein targeting to mitochondrion; regulation of macroautophagy; cellular response to glucose starvation; regulation of cytokinesis; regulation of protein stability; cellular response to amino acid starvation; membrane fission; po…	protein binding; lipid binding; identical protein binding; cadherin binding; protein homodimerization activity; fatty acid binding; lysophosphatidic acid acyltransferase activity	cytoplasm; membrane; cytosol; Golgi apparatus; mitochondrion; Golgi membrane; cytoplasmic vesicle; mitochondrial outer membrane; midbody; autophagosome membrane; protein-containing complex
STK17B	4.45115e-05	-0.178185	0.113	0.218	1	protein phosphorylation; phosphorylation; apoptotic process; protein autophosphorylation; intracellular signal transduction; positive regulation of fibroblast apoptotic process; programmed cell death	nucleotide binding; protein kinase activity; protein serine/threonine kinase activity; ATP binding; kinase activity; transferase activity	nucleus; membrane; plasma membrane; endoplasmic reticulum-Golgi intermediate compartment; actin cytoskeleton
SRSF10	4.83781e-05	-0.2435	0.738	0.842	1	mRNA processing; RNA splicing; mRNA splicing, via spliceosome; regulation of RNA splicing; regulation of alternative mRNA splicing, via spliceosome; regulation of transcription, DNA-templated; negative regulation of mRNA splicing, via spliceosome; RNA splicing, via transesterification reactions; mRNA cis splicing, via spliceosome; spliceosomal tri-snRNP complex assembly; mRNA splice site selectio…	nucleic acid binding; RNA binding; protein binding; unfolded protein binding; RS domain binding	nucleus; cytoplasm; nuclear speck; cytosol; nucleoplasm
STMN1	4.95017e-05	-0.151249	0.991	0.995	1	multicellular organism development; cell differentiation; nervous system development; regulation of microtubule polymerization or depolymerization; mitotic cytokinesis; axonogenesis; brain development; negative regulation of microtubule polymerization; positive regulation of cellular component movement; response to virus; microtubule depolymerization; neuron projection development; regulation of …	protein binding; tubulin binding	cytoplasm; cytoskeleton; microtubule; cytosol; membrane; neuron projection; extracellular exosome; intracellular
PKIA	5.14613e-05	0.2564	0.649	0.586	1	negative regulation of cAMP-dependent protein kinase activity; phosphorylation; negative regulation of transcription by RNA polymerase II; negative regulation of protein kinase activity; regulation of G2/M transition of mitotic cell cycle; negative regulation of protein import into nucleus; negative regulation of catalytic activity; negative regulation of protein serine/threonine kinase activity	kinase activity; protein binding; protein kinase inhibitor activity; cAMP-dependent protein kinase inhibitor activity; protein kinase A catalytic subunit binding	nucleus; cytoplasm
BRD7	5.23042e-05	-0.248335	0.512	0.639	1	cell cycle; Wnt signaling pathway; positive regulation of transcription, DNA-templated; negative regulation of cell population proliferation; negative regulation of transcription, DNA-templated; regulation of signal transduction by p53 class mediator; regulation of transcription by RNA polymerase II; negative regulation of G1/S transition of mitotic cell cycle; positive regulation of histone acet…	protein binding; transcription coactivator activity; transcription corepressor activity; transcription regulatory region DNA binding; p53 binding; lysine-acetylated histone binding; transcription factor binding; histone binding	nucleus; cytosol; nucleoplasm; cytoplasm
PRDX6	5.24752e-05	0.25711	0.695	0.646	1	oxidation-reduction process; lipid metabolic process; lipid catabolic process; cell redox homeostasis; metabolic process; cellular oxidant detoxification; neutrophil degranulation; cellular response to oxidative stress; response to oxidative stress; hydrogen peroxide catabolic process; glycerophospholipid catabolic process; positive regulation of mRNA splicing, via spliceosome	oxidoreductase activity; hydrolase activity; protein binding; catalytic activity; phospholipase A2 activity; phospholipase A2 activity (consuming 1,2-dipalmitoylphosphatidylcholine); phospholipase A2 activity consuming 1,2-dioleoylphosphatidylethanolamine); peroxidase activity; peroxiredoxin activity; antioxidant activity; cadherin binding; ubiquitin protein ligase binding; protein homodimerizati…	cytoplasm; cell; nucleus; membrane; extracellular space; cytosol; perinuclear region of cytoplasm; lysosome; extracellular region; extracellular exosome; azurophil granule lumen
RNF165	5.25266e-05	0.241568	0.576	0.499	1	protein polyubiquitination; axonogenesis; motor neuron axon guidance; multicellular organism aging; protein catabolic process; positive regulation of BMP signaling pathway; forelimb morphogenesis; limb development; innervation; muscle structure development	zinc ion binding; metal ion binding; transferase activity; ligase activity; protein binding; ubiquitin protein ligase activity	nucleus; protein-containing complex
RCOR2	5.33117e-05	-0.205929	0.613	0.727	1	regulation of transcription by RNA polymerase II; negative regulation of transcription, DNA-templated	DNA binding; protein binding; DNA-binding transcription factor activity; DNA-binding transcription factor activity, RNA polymerase II-specific; transcription factor binding; transcription corepressor activity; transcription regulatory region DNA binding; enzyme binding	nucleus; transcription factor complex; transcriptional repressor complex
TASOR2	5.36521e-05	-0.159484	0.128	0.234	1		protein binding	nucleus; cytosol; nucleoplasm
SLTM	5.43757e-05	-0.201292	0.591	0.696	1	apoptotic process; regulation of transcription by RNA polymerase II; regulation of mRNA processing	nucleic acid binding; RNA binding; sequence-specific DNA binding	nucleus; nucleoplasm; nuclear body
GCA	5.73855e-05	-0.237342	0.527	0.646	1	neutrophil degranulation; membrane fusion	calcium ion binding; metal ion binding; protein homodimerization activity; protein binding; protein heterodimerization activity	cytosol; plasma membrane; cytoplasm; membrane; extracellular region; extracellular exosome; azurophil granule lumen
GYG1	5.7485e-05	0.108739	0.128	0.061	1	neutrophil degranulation; glycogen biosynthetic process	metal ion binding; transferase activity; protein homodimerization activity; protein binding; transferase activity, transferring glycosyl groups; manganese ion binding; glycogenin glucosyltransferase activity; UDP-alpha-D-glucose:glucosyl-glycogenin alpha-D-glucosyltransferase activity	membrane; extracellular region; cytosol; secretory granule lumen; ficolin-1-rich granule lumen; lysosomal lumen
PNRC1	5.77139e-05	-0.257176	0.683	0.795	1		protein binding	nucleus
HNRNPAB	5.79204e-05	-0.195667	0.643	0.78	1	positive regulation of transcription, DNA-templated; epithelial to mesenchymal transition	nucleic acid binding; RNA binding; protein binding; sequence-specific DNA binding; DNA-binding transcription factor activity; sequence-specific double-stranded DNA binding; mRNA binding	nucleus; cytoplasm; nucleoplasm; ribonucleoprotein complex; RNA polymerase II transcription factor complex
NDUFB10	5.91031e-05	0.192188	0.902	0.84	1	oxidation-reduction process; mitochondrial respiratory chain complex I assembly; mitochondrial electron transport, NADH to ubiquinone	protein binding; NADH dehydrogenase (ubiquinone) activity	membrane; mitochondrial inner membrane; mitochondrion; respirasome; mitochondrial respiratory chain complex I
RPS12	5.95607e-05	-0.132584	1	1	1	translation; viral transcription; translational initiation; nuclear-transcribed mRNA catabolic process, nonsense-mediated decay; SRP-dependent cotranslational protein targeting to membrane	RNA binding; structural constituent of ribosome	cytoplasm; membrane; Golgi apparatus; intracellular membrane-bounded organelle; cytosol; ribosome; cytosolic small ribosomal subunit; nucleoplasm; intracellular
ZBTB18	6.03564e-05	-0.228047	0.384	0.523	1	multicellular organism development; negative regulation of transcription by RNA polymerase II; cellular response to DNA damage stimulus; negative regulation of transcription, DNA-templated; positive regulation of transcription by RNA polymerase II; skeletal muscle tissue development	nucleic acid binding; metal ion binding; DNA binding; protein binding; sequence-specific DNA binding; DNA-binding transcription factor activity, RNA polymerase II-specific; DNA-binding transcription factor activity; transcription coactivator activity	nucleus; nuclear chromosome
EOMES	6.0679e-05	-0.246912	0.451	0.59	1	negative regulation of DNA-binding transcription factor activity; regulation of transcription, DNA-templated; multicellular organism development; cell differentiation; positive regulation of transcription, DNA-templated; immune system process; adaptive immune response; positive regulation of transcription by RNA polymerase II; negative regulation of transcription by RNA polymerase II; mesoderm fo…	DNA binding; DNA-binding transcription factor activity; RNA polymerase II regulatory region sequence-specific DNA binding; DNA-binding transcription activator activity, RNA polymerase II-specific; DNA-binding transcription factor activity, RNA polymerase II-specific; RNA polymerase II activating transcription factor binding; sequence-specific DNA binding; chromatin binding	nucleus; nuclear chromatin
PEX16	6.14258e-05	-0.133567	0.098	0.194	1	peroxisome organization; protein targeting to peroxisome; protein import into peroxisome matrix; protein to membrane docking; protein import into peroxisome membrane; peroxisome membrane biogenesis; ER-dependent peroxisome organization; ER-dependent peroxisome localization	protein binding; protein C-terminus binding	membrane; integral component of membrane; endoplasmic reticulum; endoplasmic reticulum membrane; peroxisome; peroxisomal membrane; integral component of peroxisomal membrane
SCOC	6.18162e-05	0.210376	0.723	0.662	1	positive regulation of macroautophagy; regulation of protein complex stability	protein binding	cytoplasm; membrane; Golgi apparatus; nucleoplasm; cytosol; Golgi membrane; trans-Golgi network; endosome
TMBIM4	6.20646e-05	-0.163461	0.116	0.212	1	negative regulation of apoptotic process; apoptotic process; regulation of calcium-mediated signaling	protein binding	membrane; integral component of membrane; Golgi apparatus; Golgi membrane; Golgi stack
CDKN1C	6.30778e-05	0.45112	0.537	0.447	1	negative regulation of epithelial cell proliferation; positive regulation of transforming growth factor beta receptor signaling pathway; cell cycle; cell cycle arrest; positive regulation of transcription, DNA-templated; regulation of mitotic cell cycle; negative regulation of transcription, DNA-templated; negative regulation of mitotic cell cycle; negative regulation of cyclin-dependent protein …	protein binding; protein kinase inhibitor activity; cyclin-dependent protein serine/threonine kinase inhibitor activity; protein-containing complex binding	cytoplasm; nucleus
MAPK1	6.40093e-05	0.194264	0.399	0.294	1	protein phosphorylation; phosphorylation; cell cycle; apoptotic process; Fc-epsilon receptor signaling pathway; Fc-gamma receptor signaling pathway involved in phagocytosis; intracellular signal transduction; positive regulation of peptidyl-threonine phosphorylation; MAPK cascade; regulation of gene expression; viral process; regulation of cellular response to heat; neutrophil degranulation; regu…	nucleotide binding; protein kinase activity; protein serine/threonine kinase activity; ATP binding; kinase activity; transferase activity; MAP kinase activity; DNA binding; protein binding; identical protein binding; phosphatase binding; RNA polymerase II CTD heptapeptide repeat kinase activity; phosphotyrosine residue binding; double-stranded DNA binding; MAP kinase kinase activity; transcriptio…	nucleus; cytoplasm; membrane; Golgi apparatus; mitochondrion; cytosol; plasma membrane; cytoskeleton; caveola; focal adhesion; microtubule organizing center; spindle; extracellular region; early endosome; nucleoplasm; late endosome; mitotic spindle; ficolin-1-rich granule lumen; azurophil granule lumen; postsynaptic density; axon; pseudopodium; dendrite cytoplasm; protein-containing complex; peri…
TUBB3	6.47469e-05	0.244329	0.997	0.995	1	cytoskeleton organization; microtubule-based process; microtubule cytoskeleton organization; mitotic cell cycle; axon guidance; neuron differentiation; netrin-activated signaling pathway; dorsal root ganglion development	nucleotide binding; GTPase activity; GTP binding; structural constituent of cytoskeleton; protein binding; netrin receptor binding	microtubule; nucleus; cytoplasm; cytoskeleton; cell projection; lamellipodium; filopodium; growth cone; extracellular exosome; dendrite; axon
EFNB2	6.50651e-05	0.206287	0.768	0.708	1	positive regulation of cell population proliferation; positive regulation of cardiac muscle cell differentiation; negative regulation of neuron projection development; cell adhesion; multicellular organism development; cell differentiation; viral entry into host cell; ephrin receptor signaling pathway; nervous system development; axon guidance; viral process; angiogenesis; cell-cell signaling; an…	protein binding; ephrin receptor binding; virus receptor activity; signaling receptor binding	membrane; integral component of membrane; plasma membrane; cell junction; focal adhesion; adherens junction; integral component of plasma membrane; Schaffer collateral - CA1 synapse; glutamatergic synapse; integral component of presynaptic membrane; integral component of postsynaptic density membrane
LYPD1	6.98325e-05	-0.208193	0.085	0.175	1	acetylcholine receptor signaling pathway; negative regulation of signaling receptor activity; behavioral fear response; synaptic transmission, cholinergic; response to nicotine; negative regulation of protein localization to plasma membrane	acetylcholine receptor inhibitor activity; acetylcholine receptor binding	membrane; plasma membrane; extracellular region; anchored component of membrane
GPM6A	6.98608e-05	-0.181796	0.884	0.954	1	calcium ion transmembrane transport; nervous system development; neuron projection morphogenesis; stem cell differentiation; neuron projection development; positive regulation of filopodium assembly; neuron migration; synapse assembly; neural retina development; response to bacterium; regulation of synapse organization	protein binding; calcium channel activity	membrane; integral component of membrane; plasma membrane; cell projection; axon; filopodium; axonal growth cone; extracellular exosome; neuronal cell body; dendritic spine; neuron projection; extracellular vesicle; glutamatergic synapse; integral component of presynaptic active zone membrane
LAPTM4A	7.01548e-05	-0.207069	0.619	0.733	1		protein binding	membrane; integral component of membrane; Golgi apparatus; lysosomal membrane; late endosome membrane; endomembrane system
FSCN1	7.02957e-05	0.213125	0.655	0.579	1	actin filament organization; actin cytoskeleton organization; cell migration; actin filament bundle assembly; positive regulation of filopodium assembly; regulation of actin cytoskeleton organization; cytokine-mediated signaling pathway; cell-cell junction assembly; regulation of microvillus assembly; positive regulation of lamellipodium assembly; establishment or maintenance of cell polarity; mi…	RNA binding; actin binding; actin filament binding; protein binding; protein binding, bridging; drug binding; cadherin binding	cytoplasm; cytosol; cytoskeleton; cell projection; cell junction; lamellipodium; filopodium; growth cone; extracellular exosome; podosome; stress fiber; cell cortex; invadopodium; microvillus; ruffle; actin cytoskeleton; cell-cell junction; microspike; cell projection membrane
SOD2	7.10007e-05	0.154918	0.25	0.158	1	negative regulation of vascular smooth muscle cell proliferation; negative regulation of cell population proliferation; positive regulation of cell migration; positive regulation of vascular associated smooth muscle cell apoptotic process; positive regulation of vascular smooth muscle cell differentiation involved in phenotypic switching; oxidation-reduction process; superoxide metabolic process;…	metal ion binding; oxidoreductase activity; manganese ion binding; identical protein binding; superoxide dismutase activity; metal ion binding; superoxide dismutase activity	mitochondrion; mitochondrial matrix; extracellular exosome;
GOLGA8A	7.20473e-05	-0.222176	0.262	0.383	1	Golgi organization		membrane; Golgi apparatus; cytosol; Golgi cis cisterna; cis-Golgi network; Golgi cisterna membrane
SNN	7.26679e-05	0.261186	0.409	0.315	1	response to toxic substance	metal ion binding	membrane; integral component of membrane; mitochondrion; mitochondrial outer membrane; cytoplasm
STK33	7.48658e-05	0.138784	0.149	0.079	1	protein phosphorylation; phosphorylation; protein autophosphorylation; signal transduction in response to DNA damage; mitotic DNA damage checkpoint	nucleotide binding; protein kinase activity; protein serine/threonine kinase activity; ATP binding; kinase activity; transferase activity	cytoplasm; perinuclear region of cytoplasm; nucleus
SNRPA1	7.49731e-05	0.198521	0.595	0.504	1	mRNA processing; RNA splicing; mRNA splicing, via spliceosome; spermatogenesis; interleukin-12-mediated signaling pathway	RNA binding; protein binding; U2 snRNA binding	nucleus; nuclear speck; nucleoplasm; spliceosomal complex; nuclear body; catalytic step 2 spliceosome; U2 snRNP; U2-type precatalytic spliceosome; U2-type catalytic step 2 spliceosome; small nuclear ribonucleoprotein complex
POU3F4	7.69617e-05	0.18166	0.207	0.121	1	regulation of transcription, DNA-templated; regulation of transcription by RNA polymerase II; brain development; transcription by RNA polymerase II; sensory perception of sound; forebrain neuron differentiation; inner ear development; cochlea morphogenesis; negative regulation of mesenchymal cell apoptotic process	DNA binding; DNA-binding transcription factor activity; sequence-specific DNA binding; RNA polymerase II regulatory region sequence-specific DNA binding; AT DNA binding; double-stranded DNA binding	nucleus
DISP3	7.78908e-05	-0.146892	0.146	0.256	1	lipid metabolic process; steroid metabolic process; cell differentiation; cholesterol metabolic process; smoothened signaling pathway; positive regulation of neural precursor cell proliferation; negative regulation of neuron differentiation; cholesterol homeostasis; regulation of lipid transport; positive regulation of lipid metabolic process		nucleus; cytoplasm; membrane; integral component of membrane; endoplasmic reticulum; endoplasmic reticulum membrane; cytoplasmic vesicle; cytoplasmic vesicle membrane; nuclear membrane
PKN1	7.82667e-05	0.176679	0.415	0.316	1	protein phosphorylation; phosphorylation; signal transduction; positive regulation of nucleic acid-templated transcription; chromatin organization; intracellular signal transduction; regulation of transcription by RNA polymerase II; peptidyl-serine phosphorylation; regulation of cell motility; activation of JUN kinase activity; epithelial cell migration; histone H3-T11 phosphorylation; B cell hom…	nucleotide binding; protein kinase activity; protein serine/threonine kinase activity; ATP binding; kinase activity; transferase activity; protein binding; protein kinase C activity; GTP-Rho binding; nuclear receptor transcription coactivator activity; chromatin binding; histone binding; histone kinase activity (H3-T11 specific); histone deacetylase binding; androgen receptor binding; protein kin…	nucleus; cytoplasm; membrane; plasma membrane; midbody; endosome; nucleoplasm; cytosol; cleavage furrow; cytoplasmic vesicle; protein-containing complex
GLOD4	8.08105e-05	0.199233	0.567	0.47	1		cadherin binding	mitochondrion; extracellular exosome
RPS19	8.20257e-05	-0.129701	1	1	1	translation; ribosomal small subunit assembly; rRNA processing; ribosomal small subunit biogenesis; defense response to Gram-negative bacterium; viral transcription; Notch signaling pathway; antimicrobial humoral immune response mediated by antimicrobial peptide; translational initiation; maturation of SSU-rRNA; nuclear-transcribed mRNA catabolic process, nonsense-mediated decay; killing of cells…	RNA binding; structural constituent of ribosome; protein homodimerization activity; protein binding; protein kinase binding; fibroblast growth factor binding	nucleus; cytoplasm; membrane; nucleoplasm; ribosome; cytosol; cytosolic small ribosomal subunit; nucleolus; focal adhesion; extracellular exosome; synapse; postsynaptic density; intracellular
SLC2A1	8.29353e-05	0.220012	0.262	0.173	1	transmembrane transport; carbohydrate transport; glucose transmembrane transport; regulation of insulin secretion; protein-containing complex assembly; L-ascorbic acid metabolic process; lactose biosynthetic process; response to hypoxia; response to osmotic stress; female pregnancy; regulation of glucose transmembrane transport; cerebral cortex development; response to insulin; cellular response …	transmembrane transporter activity; transporter activity; protein binding; identical protein binding; glucose transmembrane transporter activity; protein self-association; kinase binding; dehydroascorbic acid transmembrane transporter activity; xenobiotic transmembrane transporter activity; D-glucose transmembrane transporter activity	membrane; integral component of membrane; plasma membrane; melanosome; midbody; integral component of plasma membrane; extracellular exosome; blood microparticle; cell surface; Golgi membrane; cortical actin cytoskeleton; apical plasma membrane; female pronucleus; cytoplasm; cytosol; caveola; cell-cell junction; intercalated disc; basolateral plasma membrane; Z disc; vesicle; sarcolemma; membrane…
TDRD3	8.5856e-05	-0.149114	0.143	0.246	1	positive regulation of nucleic acid-templated transcription; chromatin organization	RNA binding; protein binding; transcription coactivator activity; chromatin binding; methylated histone binding	nucleus; cytoplasm; Golgi apparatus; cytosol; nucleoplasm; exon-exon junction complex
ASCC1	8.72378e-05	0.153059	0.29	0.193	1	DNA repair; cellular response to DNA damage stimulus; DNA dealkylation involved in DNA repair; regulation of transcription, DNA-templated	nucleic acid binding; RNA binding; protein binding	nucleus; nuclear speck; nucleoplasm; transcription factor complex; neuromuscular junction
LIMD2	8.75634e-05	-0.199265	0.284	0.409	1		metal ion binding; protein binding	nucleus; cytoplasm
SLC1A5	9.31046e-05	-0.149828	0.113	0.211	1	viral entry into host cell; amino acid transport; viral process; protein homotrimerization; glutamine transport; glutamine secretion; neutral amino acid transport; L-serine transport; L-glutamine import across plasma membrane; transmembrane transport	metal ion binding; symporter activity; protein binding; signaling receptor activity; virus receptor activity; amino acid transmembrane transporter activity; L-glutamine transmembrane transporter activity; neutral amino acid transmembrane transporter activity; L-serine transmembrane transporter activity	membrane; integral component of membrane; plasma membrane; melanosome; extracellular exosome; integral component of plasma membrane
SSR2	9.48105e-05	-0.171555	0.893	0.928	1	cotranslational protein targeting to membrane; in utero embryonic development	protein binding	membrane; integral component of membrane; endoplasmic reticulum; endoplasmic reticulum membrane
SH3BP5	9.74769e-05	-0.259636	0.311	0.429	1	intracellular signal transduction; negative regulation of protein kinase activity; signal transduction; negative regulation of protein tyrosine kinase activity	protein binding; guanyl-nucleotide exchange factor activity; Rab guanyl-nucleotide exchange factor activity; SH3 domain binding; protein kinase inhibitor activity	membrane; nucleoplasm; mitochondrion; nuclear body; cytoplasmic vesicle; cytoplasmic vesicle membrane; cytoplasm
C4orf3	9.87071e-05	0.268631	0.598	0.518	1			membrane; integral component of membrane
MEX3A	9.87266e-05	-0.213304	0.652	0.762	1		nucleic acid binding; RNA binding; metal ion binding	nucleus; cytoplasm; cytosol; P-body
WNT7B	9.89965e-05	0.241202	0.402	0.309	1	multicellular organism development; Wnt signaling pathway; neuron differentiation; synapse organization; homeostatic process; cell fate commitment; cellular response to retinoic acid; positive regulation of JNK cascade; canonical Wnt signaling pathway; lens fiber cell development; in utero embryonic development; lung morphogenesis; positive regulation of osteoblast differentiation; embryonic plac…	signaling receptor binding; protein binding; frizzled binding; receptor ligand activity	extracellular region; extracellular space; plasma membrane; endoplasmic reticulum lumen; endocytic vesicle membrane; Golgi lumen; extracellular exosome; cytoplasm
CTSB	0.000102084	0.152088	0.387	0.288	1	proteolysis; decidualization; viral entry into host cell; regulation of catalytic activity; neutrophil degranulation; regulation of apoptotic process; toll-like receptor signaling pathway; epithelial cell differentiation; proteolysis involved in cellular protein catabolic process; collagen catabolic process; cellular response to thyroid hormone stimulus	cysteine-type peptidase activity; hydrolase activity; protein binding; peptidase activity; endopeptidase activity; cysteine-type endopeptidase activity; collagen binding; proteoglycan binding	extracellular space; intracellular membrane-bounded organelle; nucleolus; extracellular region; melanosome; perinuclear region of cytoplasm; lysosome; extracellular exosome; collagen-containing extracellular matrix; intracellular; ficolin-1-rich granule lumen; endolysosome lumen
PIGBOS1	0.00010252	-0.13421	0.098	0.191	1			extracellular region
C15orf61	0.000103234	-0.177862	0.113	0.205	1			extracellular region
FLRT3	0.000103856	-0.202848	0.116	0.21	1	cell adhesion; multicellular organism development; heart development; neuron projection development; fibroblast growth factor receptor signaling pathway; negative chemotaxis; synapse assembly; response to axon injury; cell-cell adhesion via plasma-membrane adhesion molecules; embryonic morphogenesis; neuron projection extension; head development; proepicardium cell migration involved in pericardi…	protein homodimerization activity; protein binding; protein binding, bridging; fibroblast growth factor receptor binding; chemorepellent activity	membrane; integral component of membrane; cytosol; endoplasmic reticulum; endoplasmic reticulum membrane; plasma membrane; cell junction; cell projection; extracellular region; focal adhesion; integral component of plasma membrane; axon; axonal growth cone; extracellular matrix; synaptic membrane; axon terminus; extracellular space; cell-cell junction; glutamatergic synapse; integral component of…
AFF3	0.000104192	-0.185297	0.201	0.315	1	regulation of transcription, DNA-templated; embryonic hindlimb morphogenesis; response to tumor necrosis factor	DNA binding; DNA-binding transcription factor activity; double-stranded DNA binding	nucleus; cytosol; nucleoplasm; nuclear body; transcription elongation factor complex; ELL-EAF complex
NPTX1	0.000106223	0.255462	0.357	0.259	1	central nervous system development; chemical synaptic transmission; regulation of postsynaptic neurotransmitter receptor activity; axonogenesis involved in innervation	metal ion binding	cytoplasmic vesicle; plasma membrane; neuron projection; glutamatergic synapse; transport vesicle
GLCE	0.000109309	-0.18856	0.192	0.302	1	heparan sulfate proteoglycan biosynthetic process; heparin biosynthetic process	heparosan-N-sulfate-glucuronate 5-epimerase activity; metal ion binding; isomerase activity; protein homodimerization activity; calcium ion binding; racemase and epimerase activity, acting on carbohydrates and derivatives	membrane; integral component of membrane; Golgi apparatus; Golgi membrane
PFDN2	0.000110695	0.215406	0.945	0.939	1	protein folding; positive regulation of cytoskeleton organization	protein binding; unfolded protein binding; protein folding chaperone	nucleus; cytoplasm; cytosol; mitochondrion; prefoldin complex
APBB2	0.000111741	0.147676	0.18	0.102	1	regulation of transcription, DNA-templated; cell cycle arrest; negative regulation of cell growth; intracellular signal transduction; neuron migration; axon guidance; extracellular matrix organization; positive regulation of apoptotic process; negative regulation of apoptotic process	protein binding; amyloid-beta binding; transcription factor binding	nucleus; membrane; synapse; cytoplasm; lamellipodium; growth cone
FAAP20	0.000112653	-0.162407	0.384	0.526	1	DNA repair; cellular response to DNA damage stimulus; interstrand cross-link repair; translesion synthesis	metal ion binding; protein binding; ubiquitin binding; ubiquitin-dependent protein binding; K63-linked polyubiquitin modification-dependent protein binding; polyubiquitin modification-dependent protein binding	nucleus; nucleoplasm; chromosome; cell junction; nuclear body; Fanconi anaemia nuclear complex
SLC38A1	0.000116053	0.281094	0.509	0.418	1	ion transport; sodium ion transport; amino acid transmembrane transport; amino acid transport; L-alpha-amino acid transmembrane transport; neutral amino acid transport; neurotransmitter uptake; glutamine transport; female pregnancy	symporter activity; protein binding; amino acid transmembrane transporter activity; neutral amino acid transmembrane transporter activity; amino acid:sodium symporter activity; L-amino acid transmembrane transporter activity; L-glutamine transmembrane transporter activity	membrane; integral component of membrane; plasma membrane; integral component of plasma membrane; extracellular exosome; axon
NES	0.000117095	0.212375	0.253	0.163	1	multicellular organism development; nervous system development; positive regulation of neural precursor cell proliferation; brain development; negative regulation of protein binding; negative regulation of catalytic activity; central nervous system development; G2/M transition of mitotic cell cycle; stem cell proliferation; embryonic camera-type eye development; positive regulation of intermediat…	protein binding; intermediate filament binding	intermediate filament cytoskeleton; intermediate filament; cytoplasm
FGFR1	0.000119464	0.179696	0.244	0.157	1	protein phosphorylation; phosphorylation; positive regulation of cell population proliferation; peptidyl-tyrosine phosphorylation; fibroblast growth factor receptor signaling pathway; positive regulation of blood vessel endothelial cell migration; positive regulation of vascular endothelial cell proliferation; phosphatidylinositol-mediated signaling; transmembrane receptor protein tyrosine kinase…	nucleotide binding; protein kinase activity; ATP binding; kinase activity; transferase activity; protein tyrosine kinase activity; transmembrane receptor protein tyrosine kinase activity; fibroblast growth factor-activated receptor activity; protein homodimerization activity; protein binding; identical protein binding; heparin binding; fibroblast growth factor binding; receptor-receptor interacti…	membrane; integral component of membrane; nucleus; cytoplasm; nucleolus; cytosol; plasma membrane; extracellular region; cytoplasmic vesicle; integral component of plasma membrane; receptor complex
LINC01122	0.000121963	-0.134609	0.07	0.154	1
TXNL1	0.000124149	0.192514	0.835	0.8	1	oxidation-reduction process; cell redox homeostasis	disulfide oxidoreductase activity	nucleus; cytoplasm; cytosol; proteasome complex; cell
SETMAR	0.000126336	-0.113917	0.058	0.135	1	methylation; chromatin organization; metabolic process; DNA repair; cellular response to DNA damage stimulus; histone lysine methylation; cell population proliferation; negative regulation of cell cycle arrest; positive regulation of double-strand break repair via nonhomologous end joining; replication fork processing; double-strand break repair via nonhomologous end joining; histone H3-K4 methyl…	zinc ion binding; metal ion binding; transferase activity; methyltransferase activity; hydrolase activity; DNA binding; protein homodimerization activity; catalytic activity; endonuclease activity; nuclease activity; histone-lysine N-methyltransferase activity; protein binding; double-stranded DNA binding; histone methyltransferase activity (H3-K4 specific); single-stranded DNA binding; single-st…	nucleus; nucleolus; chromosome; site of double-strand break; condensed chromosome
PFN1	0.000136978	0.191023	0.817	0.758	1	actin cytoskeleton organization; protein stabilization; Wnt signaling pathway, planar cell polarity pathway; positive regulation of actin filament polymerization; positive regulation of epithelial cell migration; positive regulation of ATPase activity; negative regulation of stress fiber assembly; negative regulation of actin filament polymerization; regulation of actin filament polymerization; n…	RNA binding; actin binding; protein binding; cadherin binding; actin monomer binding; phosphatidylinositol-4,5-bisphosphate binding; proline-rich region binding; adenyl-nucleotide exchange factor activity; Rho GTPase binding	nucleus; cytoplasm; membrane; cytoskeleton; focal adhesion; cytosol; extracellular exosome; cell cortex; blood microparticle; glutamatergic synapse
TRIR	0.000139123	-0.186318	0.826	0.884	1	RNA phosphodiester bond hydrolysis, exonucleolytic; rRNA catabolic process	3'-5' exonuclease activity; 5'-3' exonuclease activity; RNA binding; hydrolase activity; protein binding; exonuclease activity; nuclease activity
NDUFA10	0.000142052	0.203163	0.579	0.495	1	oxidation-reduction process; mitochondrial electron transport, NADH to ubiquinone; mitochondrial respiratory chain complex I assembly	NADH dehydrogenase (ubiquinone) activity	mitochondrion; mitochondrial matrix; mitochondrial respiratory chain complex I; respirasome; cytoplasm; mitochondrial inner membrane
ZFP69B	0.000143112	-0.123281	0.064	0.142	1	regulation of transcription, DNA-templated	DNA-binding transcription factor activity; nucleic acid binding; metal ion binding; DNA binding; protein binding; sequence-specific DNA binding	nucleus; intracellular
C12orf75	0.000148862	0.209521	0.29	0.202	1
SAMD1	0.000149582	-0.193304	0.378	0.504	1		protein binding
NYNRIN	0.000151033	-0.128777	0.095	0.183	1	DNA integration	nucleic acid binding	membrane; integral component of membrane
MAGI2	0.000151331	0.215449	0.262	0.178	1	signal transduction; positive regulation of signal transduction; nervous system development; receptor clustering; protein heterooligomerization; negative regulation of cell population proliferation; SMAD protein signal transduction; glomerular visceral epithelial cell development; negative regulation of protein kinase B signaling; negative regulation of cell migration; positive regulation of neur…	protein binding; molecular adaptor activity; phosphatase binding; SMAD binding; receptor signaling complex adaptor activity; beta-1 adrenergic receptor binding; activin receptor binding; type II activin receptor binding; kinase activity	nucleus; cytoplasm; membrane; plasma membrane; perinuclear region of cytoplasm; cell junction; synapse; dendrite; bicellular tight junction; endosome; protein-containing complex; cell-cell junction; postsynaptic density; late endosome; neuron projection; slit diaphragm
TET1	0.000152353	0.237102	0.54	0.457	1	oxidation-reduction process; chromatin organization; 5-methylcytosine catabolic process; DNA demethylation; oxidative demethylation; positive regulation of transcription by RNA polymerase II; positive regulation of cell population proliferation; protein O-linked glycosylation; stem cell population maintenance; negative regulation of methylation-dependent chromatin silencing; inner cell mass cell …	zinc ion binding; metal ion binding; oxidoreductase activity; DNA binding; dioxygenase activity; iron ion binding; methylcytosine dioxygenase activity	nucleus
LZTS1	0.000152911	0.250626	0.424	0.331	1	cell cycle; regulation of transcription, DNA-templated; transcription, DNA-templated; negative regulation of macroautophagy; mitotic cell cycle phase transition; regulation of synaptic plasticity; regulation of dendrite morphogenesis	DNA binding; protein binding; microtubule binding; DNA-binding transcription factor activity	cytoplasm; membrane; plasma membrane; cell projection; cell junction; synapse; postsynaptic membrane; postsynaptic density; dendritic spine; apical plasma membrane; neuron projection; dendritic shaft; cell body
FAT4	0.000153909	-0.123555	0.061	0.138	1	cell adhesion; homophilic cell adhesion via plasma membrane adhesion molecules; hippo signaling; cerebral cortex development; cell-cell adhesion; neurogenesis; heterophilic cell-cell adhesion via plasma membrane cell adhesion molecules; branching involved in ureteric bud morphogenesis; kidney development; heart morphogenesis; plasma membrane organization; Notch signaling pathway; fibroblast growt…	calcium ion binding; protein binding	membrane; integral component of membrane; plasma membrane; extracellular exosome; apical part of cell
COTL1	0.000155052	0.236887	0.433	0.346	1	defense response to fungus; neutrophil degranulation; regulation of actin filament polymerization	actin binding; protein binding; actin filament binding; enzyme binding	nucleus; cytoplasm; cytoskeleton; extracellular region; plasma membrane; extracellular exosome; cortical actin cytoskeleton; actin filament; secretory granule lumen; ficolin-1-rich granule lumen; site of polarized growth; intracellular
GPC2	0.000155112	-0.216242	0.652	0.746	1	regulation of signal transduction; cell migration; retinoid metabolic process; glycosaminoglycan biosynthetic process; glycosaminoglycan catabolic process; smoothened signaling pathway; positive regulation of neuron projection development; regulation of protein localization to membrane; neuron differentiation	protein binding	membrane; extracellular space; plasma membrane; extracellular region; collagen-containing extracellular matrix; anchored component of membrane; anchored component of plasma membrane; cell surface; synapse; endoplasmic reticulum; lysosomal lumen; Golgi lumen
DDX21	0.000155299	-0.240463	0.595	0.689	1	immune system process; innate immune response; rRNA processing; defense response to virus; transcription by RNA polymerase II; positive regulation of I-kappaB kinase/NF-kappaB signaling; positive regulation of gene expression, epigenetic; osteoblast differentiation; positive regulation of myeloid dendritic cell cytokine production; response to virus; response to exogenous dsRNA	nucleic acid binding; RNA binding; nucleotide binding; ATP binding; hydrolase activity; protein binding; helicase activity; rRNA binding; RNA helicase activity; 7SK snRNA binding; miRNA binding; snoRNA binding; double-stranded RNA binding; identical protein binding	nucleus; cytoplasm; membrane; nucleolus; mitochondrion; cytosol; nucleoplasm
CDKL2	0.000155361	0.142669	0.213	0.133	1	protein phosphorylation; phosphorylation; regulation of cell cycle; signal transduction; sex differentiation	nucleotide binding; protein kinase activity; protein serine/threonine kinase activity; ATP binding; kinase activity; transferase activity; cyclin-dependent protein serine/threonine kinase activity	nucleus; cytoplasm; centrosome
TP53RK	0.000158542	-0.170996	0.253	0.37	1	protein phosphorylation; phosphorylation; tRNA processing; regulation of signal transduction by p53 class mediator; tRNA threonylcarbamoyladenosine metabolic process	nucleotide binding; protein kinase activity; protein serine/threonine kinase activity; ATP binding; kinase activity; transferase activity; hydrolase activity; protein binding; p53 binding	nucleus; cytoplasm; nucleoplasm; EKC/KEOPS complex
PCCA-DT	0.000159079	0.101292	0.116	0.056	1
PPM1A	0.000160196	0.204909	0.323	0.231	1	positive regulation of canonical Wnt signaling pathway; positive regulation of transcription, DNA-templated; protein dephosphorylation; positive regulation of I-kappaB kinase/NF-kappaB signaling; negative regulation of I-kappaB kinase/NF-kappaB signaling; negative regulation of SMAD protein complex assembly; negative regulation of transforming growth factor beta receptor signaling pathway; peptid…	metal ion binding; magnesium ion binding; hydrolase activity; catalytic activity; phosphoprotein phosphatase activity; protein binding; manganese ion binding; protein serine/threonine phosphatase activity; cation binding; magnesium-dependent protein serine/threonine phosphatase activity; R-SMAD binding; calmodulin-dependent protein phosphatase activity	nucleus; cytoplasm; membrane; cytosol; plasma membrane; nucleoplasm
POU2F1	0.000160212	0.185833	0.451	0.352	1	regulation of transcription, DNA-templated; positive regulation of transcription by RNA polymerase II; negative regulation of transcription, DNA-templated; cytokine-mediated signaling pathway; snRNA transcription by RNA polymerase II	DNA binding; DNA-binding transcription factor activity; sequence-specific DNA binding; protein binding; DNA-binding transcription factor activity, RNA polymerase II-specific; RNA polymerase II core promoter sequence-specific DNA binding; RNA polymerase II proximal promoter sequence-specific DNA binding	nucleus; intracellular membrane-bounded organelle; endoplasmic reticulum; nucleoplasm; nuclear chromatin; RNA polymerase II transcription factor complex
DCX	0.000160407	0.24729	0.857	0.842	1	intracellular signal transduction; multicellular organism development; cell differentiation; nervous system development; central nervous system development; neuron migration; axoneme assembly; photoreceptor cell development; retina development in camera-type eye; brain development; hippocampus development; layer formation in cerebral cortex; pyramidal neuron development; central nervous system pr…	protein binding; microtubule binding; protein kinase binding	cytoplasm; cytosol; cell projection; microtubule; neuron projection; cytoskeleton; microtubule associated complex; axoneme
CDCA7L	0.000161065	0.246028	0.238	0.156	1	regulation of transcription, DNA-templated; positive regulation of cell population proliferation; cell division	protein binding	nucleus; cytoplasm; nucleolus; cytosol; fibrillar center; membrane; integral component of membrane
DLL3	0.000162298	0.388234	0.604	0.54	1	multicellular organism development; Notch signaling pathway; cell differentiation; skeletal system development; negative regulation of Notch signaling pathway; somitogenesis; compartment pattern specification; tissue development; paraxial mesoderm development; negative regulation of neurogenesis	calcium ion binding; Notch binding	integral component of membrane; membrane; plasma membrane
EIF4EBP1	0.000168274	-0.2238	0.46	0.59	1	negative regulation of translational initiation; regulation of translation; negative regulation of translation; positive regulation of mitotic cell cycle; G1/S transition of mitotic cell cycle; TOR signaling; IRES-dependent translational initiation of linear mRNA; response to ischemia; insulin receptor signaling pathway; lung development; negative regulation of protein complex assembly; response …	eukaryotic initiation factor 4E binding; protein binding; translation repressor activity; translation initiation factor binding; protein phosphatase 2A binding	cytosol; cytoplasm; nucleus; protein-containing complex; glutamatergic synapse; postsynaptic cytosol
STARD3NL	0.000169086	0.223006	0.655	0.585	1	C21-steroid hormone biosynthetic process; vesicle tethering to endoplasmic reticulum	protein homodimerization activity; protein binding; cholesterol binding	membrane; integral component of membrane; intracellular membrane-bounded organelle; endoplasmic reticulum membrane; lysosomal membrane; endosome; late endosome membrane; cytosol; organelle membrane contact site; endoplasmic reticulum-endosome membrane contact site
TRMT112	0.000169989	0.194048	0.796	0.768	1	peptidyl-glutamine methylation; rRNA processing; rRNA methylation; rRNA (guanine-N7)-methylation; positive regulation of rRNA processing; tRNA methylation; methylation; translational termination	protein heterodimerization activity; protein binding; rRNA (guanine) methyltransferase activity; protein methyltransferase activity	nucleus; cytoplasm; perinuclear region of cytoplasm; nucleoplasm; cytosol; protein-containing complex
RPS11	0.000173818	0.117476	1	1	1	translation; viral transcription; translational initiation; nuclear-transcribed mRNA catabolic process, nonsense-mediated decay; SRP-dependent cotranslational protein targeting to membrane	RNA binding; structural constituent of ribosome; protein binding; rRNA binding	cytoplasm; membrane; ribosome; cytosolic small ribosomal subunit; nucleolus; focal adhesion; nucleoplasm; cytosol; extracellular exosome; intracellular
RPL36	0.000175033	-0.128373	1	1	1	translation; cytoplasmic translation; viral transcription; translational initiation; nuclear-transcribed mRNA catabolic process, nonsense-mediated decay; SRP-dependent cotranslational protein targeting to membrane	RNA binding; structural constituent of ribosome	cytoplasm; membrane; ribosome; cytosol; nucleolus; cytosolic large ribosomal subunit; polysomal ribosome; intracellular
PTPRN2	0.000177112	-0.151533	0.058	0.131	1	lipid metabolic process; protein dephosphorylation; dephosphorylation; peptidyl-tyrosine dephosphorylation; insulin secretion involved in cellular response to glucose stimulus; neutrophil degranulation; neurotransmitter secretion; negative regulation of GTPase activity	hydrolase activity; phosphoprotein phosphatase activity; protein tyrosine phosphatase activity; phosphatase activity; transmembrane receptor protein tyrosine phosphatase activity	membrane; integral component of membrane; cell junction; cytoplasmic vesicle; synapse; secretory granule; plasma membrane; integral component of plasma membrane; synaptic vesicle membrane; receptor complex; ficolin-1-rich granule membrane; transport vesicle membrane; secretory granule membrane; cytoplasm; endoplasmic reticulum lumen; integral component of synaptic vesicle membrane; terminal bouton
DCHS1	0.000178138	-0.135147	0.177	0.287	1	cell adhesion; homophilic cell adhesion via plasma membrane adhesion molecules; hippo signaling; neurogenesis; heterophilic cell-cell adhesion via plasma membrane cell adhesion molecules; calcium-dependent cell-cell adhesion via plasma membrane cell adhesion molecules; branching involved in ureteric bud morphogenesis; kidney development; heart morphogenesis; mitral valve morphogenesis; mitral val…	calcium ion binding	membrane; integral component of membrane; plasma membrane; apical part of cell
NEUROG2	0.00017818	-0.149836	0.558	0.676	1	regulation of transcription, DNA-templated; neuron differentiation; multicellular organism development; cell differentiation; regulation of transcription by RNA polymerase II; nervous system development; positive regulation of DNA-binding transcription factor activity	protein dimerization activity; DNA binding; DNA-binding transcription factor activity, RNA polymerase II-specific; E-box binding	nucleus; nuclear chromatin
PHYH	0.000179648	0.19504	0.326	0.238	1	oxidation-reduction process; fatty acid metabolic process; protein targeting to peroxisome; fatty acid alpha-oxidation; 2-oxoglutarate metabolic process; isoprenoid metabolic process; methyl-branched fatty acid metabolic process; 2-oxobutyrate catabolic process	metal ion binding; oxidoreductase activity; protein binding; cofactor binding; dioxygenase activity; L-ascorbic acid binding; ferrous iron binding; carboxylic acid binding; phytanoyl-CoA dioxygenase activity; catalytic activity	peroxisome; cytosol; peroxisomal matrix; mitochondrion
ZNF22	0.000181467	-0.170977	0.351	0.481	1	regulation of transcription by RNA polymerase II; regulation of transcription, DNA-templated; odontogenesis	nucleic acid binding; metal ion binding; DNA binding; DNA-binding transcription factor activity; sequence-specific DNA binding; DNA-binding transcription factor activity, RNA polymerase II-specific; zinc ion binding	nucleus; nucleoplasm
ZDHHC9	0.000183664	0.164389	0.265	0.181	1	protein targeting to membrane; peptidyl-L-cysteine S-palmitoylation; protein palmitoylation	transferase activity; transferase activity, transferring acyl groups; palmitoyltransferase activity; protein-cysteine S-palmitoyltransferase activity; protein binding; Ras palmitoyltransferase activity	membrane; integral component of membrane; Golgi apparatus; cytosol; endoplasmic reticulum; endoplasmic reticulum membrane; Golgi membrane; palmitoyltransferase complex; intrinsic component of Golgi membrane
ELAVL1	0.000183833	0.220301	0.585	0.497	1	regulation of mRNA stability; regulation of stem cell population maintenance; protein homooligomerization; mRNA splicing, via spliceosome; 3'-UTR-mediated mRNA stabilization; mRNA stabilization; negative regulation of gene silencing by miRNA; positive regulation of translation	nucleic acid binding; RNA binding; protein homodimerization activity; protein binding; protein kinase binding; mRNA 3'-UTR binding; double-stranded RNA binding; mRNA 3'-UTR AU-rich region binding; mRNA binding; miRNA binding; AU-rich element binding	nucleus; cytoplasm; membrane; cytosol; nucleoplasm; ribonucleoprotein complex; cytoplasmic stress granule; postsynapse; glutamatergic synapse
CHCHD10	0.000185778	0.244103	0.53	0.451	1	mitochondrion organization; stabilization of membrane potential; mitochondria-nucleus signaling pathway; protein localization to nucleus; maintenance of synapse structure; positive regulation of mitochondrial transcription; positive regulation of release of cytochrome c from mitochondria; oxidative phosphorylation; positive regulation of mitochondrial outer membrane permeabilization involved in a…	protein binding	mitochondrion; nucleus; MICOS complex; mitochondrial intermembrane space
TMEM108	0.000187326	0.159342	0.155	0.089	1	neuron projection development; receptor-mediated endocytosis; retrograde axonal transport; dentate gyrus development; positive regulation of neurotrophin TRK receptor signaling pathway; postsynaptic density organization; dendrite extension; modulation of excitatory postsynaptic potential; cellular response to brain-derived neurotrophic factor stimulus		membrane; integral component of membrane; axon cytoplasm; plasma membrane; cell projection; cell junction; synapse; postsynaptic membrane; dendrite; endosome; early endosome; axon; endosome membrane; postsynaptic density; somatodendritic compartment
DANCR	0.000188686	-0.251957	0.57	0.672	1
EFHD2	0.00019039	-0.145454	0.116	0.208	1		metal ion binding; calcium ion binding; cadherin binding	membrane; membrane raft
PAG1	0.000193012	-0.124218	0.076	0.158	1	intracellular signal transduction; positive regulation of signal transduction; immune system process; adaptive immune response; T cell receptor signaling pathway; signal transduction; negative regulation of T cell activation; regulation of T cell activation	protein binding; SH3/SH2 adaptor activity; SH2 domain binding	membrane; integral component of membrane; plasma membrane; membrane raft
PAM	0.000194699	0.199601	0.384	0.29	1	oxidation-reduction process; metabolic process; peptide metabolic process; peptide amidation; fatty acid primary amide biosynthetic process; response to hypoxia; long-chain fatty acid metabolic process; regulation of transcription by RNA polymerase II; central nervous system development; heart development; lactation; response to pH; toxin metabolic process; protein amidation; protein metabolic pr…	metal ion binding; monooxygenase activity; oxidoreductase activity; zinc ion binding; catalytic activity; lyase activity; calcium ion binding; copper ion binding; protein binding; oxidoreductase activity, acting on paired donors, with incorporation or reduction of molecular oxygen, reduced ascorbate as one donor, and incorporation of one atom of oxygen; L-ascorbic acid binding; peptidylglycine mo…	membrane; integral component of membrane; extracellular region; cytoplasmic vesicle; extracellular exosome; transport vesicle membrane; secretory granule membrane; extracellular space; trans-Golgi network; plasma membrane; cell surface; secretory granule; neuron projection; neuronal cell body; perikaryon; perinuclear region of cytoplasm
SSBP4	0.000194892	0.192921	0.491	0.405	1	positive regulation of transcription by RNA polymerase II	single-stranded DNA binding; protein binding; DNA binding	membrane; integral component of membrane; nucleus
SLC25A29	0.000197644	-0.167012	0.232	0.34	1	transmembrane transport; amino acid transport; acyl carnitine transmembrane transport; acyl carnitine transport; ornithine transport; L-histidine transmembrane transport; L-arginine transmembrane transport; L-lysine transmembrane transport; mitochondrial L-ornithine transmembrane transport	transmembrane transporter activity; acyl carnitine transmembrane transporter activity; basic amino acid transmembrane transporter activity; high-affinity arginine transmembrane transporter activity; high-affinity lysine transmembrane transporter activity	membrane; integral component of membrane; mitochondrial inner membrane; mitochondrion
INAFM1	0.000199777	0.223628	0.271	0.188	1		calcium channel regulator activity	membrane; integral component of membrane
AKAP6	0.000199985	0.174748	0.253	0.166	1	positive regulation of cell growth involved in cardiac muscle cell development; regulation of release of sequestered calcium ion into cytosol by sarcoplasmic reticulum; cellular response to cytokine stimulus; protein targeting; positive regulation of cell growth; regulation of membrane repolarization; positive regulation of release of sequestered calcium ion into cytosol; action potential; cellul…	protein binding; ion channel binding; molecular adaptor activity; protein kinase A binding; adenylate cyclase binding; protein membrane anchor; protein kinase A regulatory subunit binding	perinuclear region of cytoplasm; cytoplasm; nucleus; membrane; sarcoplasmic reticulum; nuclear membrane; nuclear envelope; junctional sarcoplasmic reticulum membrane; calcium channel complex; caveola; T-tubule; intercalated disc
TSPAN7	0.000203836	0.24498	0.323	0.241	1	viral process		membrane; integral component of membrane; integral component of plasma membrane
TLE4	0.00020686	0.188839	0.308	0.217	1	regulation of transcription, DNA-templated; Wnt signaling pathway; negative regulation of canonical Wnt signaling pathway; beta-catenin-TCF complex assembly; negative regulation of transcription by RNA polymerase II; negative regulation of transcription, DNA-templated; cellular response to leukemia inhibitory factor	protein binding; transcription corepressor activity; repressing transcription factor binding; DNA-binding transcription factor activity, RNA polymerase II-specific; chromatin binding	nucleus; transcription factor complex; nucleoplasm; beta-catenin-TCF complex
BBX	0.000208081	-0.208461	0.5	0.633	1	regulation of transcription by RNA polymerase II; bone development	DNA binding; DNA-binding transcription factor activity, RNA polymerase II-specific	nucleus; cytosol; nucleoplasm; nuclear chromatin
ZBTB10	0.000208631	0.167031	0.308	0.215	1		nucleic acid binding; metal ion binding; DNA binding; protein binding	nucleus; nucleoplasm
PGRMC2	0.00020871	-0.185242	0.503	0.617	1	steroid hormone mediated signaling pathway	protein binding; lipid binding; steroid binding; steroid hormone receptor activity	membrane; integral component of membrane; nuclear envelope
CPLANE1	0.000209211	0.136472	0.207	0.128	1	cell projection organization; cilium assembly; establishment of planar polarity; kidney development; cardiac septum development; ventricular septum development; heart development; cerebellum development; embryonic digit morphogenesis; roof of mouth development; coronary vasculature development; protein localization to ciliary transition zone	protein binding	membrane; integral component of membrane; cell projection; cilium; ciliary transition zone
SUCLG1	0.000211194	0.196828	0.631	0.578	1	tricarboxylic acid cycle; nucleoside diphosphate phosphorylation; succinyl-CoA metabolic process; succinate metabolic process; nucleoside triphosphate biosynthetic process	RNA binding; nucleotide binding; catalytic activity; ligase activity; cofactor binding; succinate-CoA ligase activity; succinate-CoA ligase (ADP-forming) activity; succinate-CoA ligase (GDP-forming) activity; nucleoside diphosphate kinase activity	cytosol; mitochondrion; plasma membrane; mitochondrial matrix
FAM204A	0.000215328	0.226823	0.655	0.598	1		protein binding
IER5	0.00022092	0.191788	0.598	0.52	1	positive regulation of transcription by RNA polymerase II; regulation of cell population proliferation; cellular response to heat; positive regulation of cellular response to heat	protein binding; identical protein binding	nucleus; cytoplasm; protein phosphatase type 2A complex
VAPA	0.000223066	0.183237	0.82	0.78	1	endoplasmic reticulum to Golgi vesicle-mediated transport; neutrophil degranulation; positive regulation of I-kappaB kinase/NF-kappaB signaling; neuron projection development; membrane fusion; cell death; sphingolipid biosynthetic process; negative regulation by host of viral genome replication; COPII-coated vesicle budding; positive regulation by host of viral release from host cell; positive re…	protein binding; microtubule binding; cadherin binding; protein domain specific binding; protein heterodimerization activity; FFAT motif binding	nucleus; membrane; integral component of membrane; endoplasmic reticulum; endoplasmic reticulum membrane; plasma membrane; perinuclear region of cytoplasm; cell junction; Golgi membrane; bicellular tight junction; nuclear membrane; vesicle; azurophil granule membrane; microtubule cytoskeleton
MTRNR2L8	0.000224996	0.152863	0.253	0.173	1	negative regulation of signaling receptor activity; negative regulation of execution phase of apoptosis	receptor antagonist activity	cytoplasm; extracellular region
DCTN1	0.000228764	0.219076	0.427	0.339	1	cell division; cell cycle; nervous system development; retrograde transport, endosome to Golgi; G2/M transition of mitotic cell cycle; regulation of G2/M transition of mitotic cell cycle; ciliary basal body-plasma membrane docking; establishment of mitotic spindle orientation; transport along microtubule; antigen processing and presentation of exogenous peptide antigen via MHC class II; endoplasm…	motor activity; protein binding; microtubule binding; tubulin binding; tau protein binding; protein kinase binding; dynein complex binding	cytoplasm; neuronal cell body; nucleus; membrane; centrosome; cytosol; intermediate filament cytoskeleton; cytoskeleton; microtubule; spindle pole; microtubule organizing center; spindle; kinetochore; dynein complex; centriole; cell cortex; centriolar subdistal appendage; neuron projection; nuclear envelope; cell cortex region; retromer complex; microtubule plus-end; microtubule associated comple…
SMS	0.000229006	0.238677	0.695	0.644	1	spermine biosynthetic process; polyamine biosynthetic process; polyamine metabolic process; methionine metabolic process; spermine metabolic process	transferase activity; spermine synthase activity	cytosol; extracellular exosome
NBL1	0.000231969	0.109427	0.113	0.055	1	positive regulation of neuron differentiation; signal transduction; negative regulation of BMP signaling pathway; determination of dorsal identity; negative regulation of monocyte chemotaxis; nervous system development; sequestering of BMP in extracellular matrix; sequestering of BMP from receptor via BMP binding; neuron projection morphogenesis	protein homodimerization activity; protein binding; BMP binding; morphogen activity	extracellular space; extracellular region
GABRG2	0.000233184	-0.130188	0.04	0.106	1	ion transport; chloride transport; gamma-aminobutyric acid signaling pathway; ion transmembrane transport; signal transduction; chemical synaptic transmission; regulation of membrane potential; nervous system process; chloride transmembrane transport; inhibitory synapse assembly; synaptic transmission, GABAergic; regulation of postsynaptic membrane potential; cellular response to histamine; post-…	ion channel activity; transmembrane signaling receptor activity; GABA-A receptor activity; extracellular ligand-gated ion channel activity; protein binding; chloride channel activity; transmitter-gated ion channel activity involved in regulation of postsynaptic membrane potential; benzodiazepine receptor activity; GABA-gated chloride ion channel activity; inhibitory extracellular ligand-gated ion…	membrane; integral component of membrane; plasma membrane; cell projection; cell junction; cytoplasmic vesicle; synapse; postsynaptic membrane; cytoplasmic vesicle membrane; chloride channel complex; dendrite; integral component of plasma membrane; neuron projection; postsynapse; dendrite membrane; GABA-A receptor complex; axon; GABA-ergic synapse
CSNK2A1	0.000237977	0.20821	0.756	0.714	1	negative regulation of apoptotic signaling pathway; protein phosphorylation; phosphorylation; cell cycle; rhythmic process; apoptotic process; Wnt signaling pathway; positive regulation of Wnt signaling pathway; regulation of cell cycle; protein folding; peptidyl-serine phosphorylation; peptidyl-threonine phosphorylation; positive regulation of cell population proliferation; signal transduction; …	nucleotide binding; protein kinase activity; protein serine/threonine kinase activity; ATP binding; kinase activity; transferase activity; protein binding; identical protein binding; protein N-terminus binding; Hsp90 protein binding	nucleus; nucleoplasm; cytosol; plasma membrane; PcG protein complex; Sin3 complex; NuRD complex; protein kinase CK2 complex
CFAP298	0.000238982	0.459381	0.774	0.718	1	regulation of cilium movement; cilium assembly	protein binding	nucleus; cytoplasm; cytosol; cytoskeleton; cell projection; cilium
MTRNR2L1	0.000240397	0.184044	0.326	0.234	1	negative regulation of signaling receptor activity; negative regulation of execution phase of apoptosis	receptor antagonist activity	cytoplasm; extracellular region
SLC26A11	0.000240597	0.102609	0.116	0.058	1	transmembrane transport; sulfate transport; sulfate transmembrane transport; ion transport; anion transmembrane transport	secondary active sulfate transmembrane transporter activity; sulfate transmembrane transporter activity; anion:anion antiporter activity; anion transmembrane transporter activity	membrane; integral component of membrane; Golgi apparatus; intracellular membrane-bounded organelle; nucleoplasm; endoplasmic reticulum; lysosomal membrane; plasma membrane; lysosome; integral component of plasma membrane; extracellular exosome
FOXO6	0.000243394	-0.123519	0.088	0.174	1	regulation of transcription, DNA-templated; positive regulation of transcription by RNA polymerase II; negative regulation of transcription by RNA polymerase II; regulation of transcription by RNA polymerase II; memory; insulin receptor signaling pathway; glucose homeostasis; positive regulation of dendritic spine development	DNA binding; DNA-binding transcription factor activity; sequence-specific DNA binding; protein binding; DNA-binding transcription factor activity, RNA polymerase II-specific; transcription factor binding	nucleus; cytoplasm; nuclear chromatin
ATP5F1A	0.000251656	0.16675	0.933	0.911	1	lipid metabolic process; proton transmembrane transport; ion transport; ATP synthesis coupled proton transport; ATP metabolic process; ATP biosynthetic process; negative regulation of endothelial cell proliferation; cristae formation; mitochondrial ATP synthesis coupled proton transport; positive regulation of blood vessel endothelial cell migration	RNA binding; nucleotide binding; ATP binding; protein binding; adenyl ribonucleotide binding; proton-transporting ATP synthase activity, rotational mechanism; ATPase activity; MHC class I protein binding; transmembrane transporter activity; ADP binding; angiostatin binding	membrane; mitochondrial inner membrane; mitochondrion; plasma membrane; proton-transporting ATP synthase complex, catalytic core F(1); extracellular exosome; COP9 signalosome; mitochondrial matrix; mitochondrial proton-transporting ATP synthase complex; proton-transporting ATP synthase complex
ATP2B4	0.000257235	-0.135014	0.162	0.266	1	negative regulation of nitric-oxide synthase activity; negative regulation of calcineurin-NFAT signaling cascade; negative regulation of nitric oxide biosynthetic process; negative regulation of arginine catabolic process; negative regulation of adenylate cyclase-activating adrenergic receptor signaling pathway involved in heart process; negative regulation of cardiac muscle hypertrophy in respon…	metal ion binding; nucleotide binding; ATP binding; protein binding; calcium transmembrane transporter activity, phosphorylative mechanism; protein kinase binding; PDZ domain binding; calmodulin binding; sodium channel regulator activity; scaffold protein binding; nitric-oxide synthase binding; protein phosphatase 2B binding; nitric-oxide synthase inhibitor activity	membrane; integral component of membrane; motile cilium; plasma membrane; cell projection; basolateral plasma membrane; T-tubule; sperm flagellum; sarcolemma; neuron projection; sperm principal piece; glutamatergic synapse; integral component of presynaptic active zone membrane; cilium; integral component of plasma membrane; Z disc; caveola; protein-containing complex
SCCPDH	0.000260342	0.204653	0.424	0.331	1	oxidation-reduction process; platelet degranulation; glycolipid biosynthetic process	oxidoreductase activity	nucleus; membrane; integral component of membrane; mitochondrion; midbody; extracellular region; plasma membrane; platelet alpha granule lumen; lipid droplet
TPM1	0.000261529	-0.194981	0.591	0.677	1	negative regulation of vascular smooth muscle cell proliferation; negative regulation of vascular associated smooth muscle cell migration; negative regulation of cell migration; cellular response to reactive oxygen species; regulation of cell shape; actin filament organization; ruffle organization; positive regulation of stress fiber assembly; muscle contraction; cardiac muscle contraction; ventr…	actin binding; protein homodimerization activity; protein binding; actin filament binding; identical protein binding; protein heterodimerization activity; cytoskeletal protein binding; structural constituent of muscle; structural constituent of cytoskeleton	cytoplasm; cytosol; actin cytoskeleton; cytoskeleton; actin filament; ruffle membrane; sarcomere; muscle thin filament tropomyosin; stress fiber; bleb; membrane; integral component of membrane
RRAGD	0.000265307	0.22079	0.277	0.195	1	cellular response to amino acid stimulus; regulation of autophagy; positive regulation of TOR signaling; cell cycle arrest; regulation of macroautophagy; cellular protein localization; cellular response to starvation; cellular response to leucine; cellular response to leucine starvation; positive regulation of TORC1 signaling	nucleotide binding; GTP binding; protein binding; GTPase activity; protein heterodimerization activity; GDP binding; GTPase binding	nucleus; cytoplasm; centrosome; nucleoplasm; lysosome; EGO complex; cytosol; Gtr1-Gtr2 GTPase complex
RAI1	0.000266076	-0.129965	0.104	0.192	1	rhythmic process; circadian regulation of gene expression; positive regulation of transcription, DNA-templated; positive regulation of transcription by RNA polymerase II; skeletal system development; regulation of transcription by RNA polymerase II; negative regulation of multicellular organism growth	metal ion binding; protein binding; DNA-binding transcription factor activity; transcription regulatory region DNA binding; enhancer binding	nucleus; cytoplasm; nucleoplasm; mitochondrion
EIF4A1	0.00027618	-0.158846	0.963	0.978	1	translation; translational initiation; viral process; cytoplasmic translational initiation	nucleic acid binding; ATP binding; nucleotide binding; hydrolase activity; helicase activity; RNA binding; translation initiation factor activity; protein binding; RNA helicase activity; mRNA binding; RNA cap binding; double-stranded RNA binding; translation factor activity, RNA binding	cytoplasm; membrane; cytosol; extracellular exosome; eukaryotic translation initiation factor 4F complex
PRCP	0.000276414	0.10642	0.11	0.054	1	proteolysis; neutrophil degranulation; blood coagulation, intrinsic pathway; negative regulation of systemic arterial blood pressure; regulation of blood vessel endothelial cell migration; angiogenesis involved in wound healing; regulation of thyroid hormone mediated signaling pathway; plasma kallikrein-kinin cascade; glucose homeostasis; energy homeostasis; regulation of reactive oxygen species …	hydrolase activity; protein binding; peptidase activity; serine-type peptidase activity; carboxypeptidase activity; dipeptidyl-peptidase activity; serine-type carboxypeptidase activity	lysosome; plasma membrane; extracellular exosome; azurophil granule membrane; ficolin-1-rich granule membrane; basal part of cell
H2AFY2	0.000282475	-0.15372	0.381	0.502	1	chromatin organization; nucleosome assembly; negative regulation of transcription by RNA polymerase II; brain development; negative regulation of gene expression, epigenetic; dosage compensation; positive regulation of keratinocyte differentiation; establishment of protein localization to chromatin; negative regulation of transcription of nucleolar large rRNA by RNA polymerase I	DNA binding; chromatin DNA binding; protein heterodimerization activity; transcription regulatory region DNA binding; RNA polymerase II regulatory region sequence-specific DNA binding	nucleus; nucleoplasm; chromatin; nucleosome; nuclear chromatin; chromosome; extracellular exosome; nuclear chromosome, telomeric region; Barr body
KDELR2	0.00028641	0.232158	0.546	0.483	1	protein transport; protein retention in ER lumen; vesicle-mediated transport; endoplasmic reticulum to Golgi vesicle-mediated transport; retrograde vesicle-mediated transport, Golgi to endoplasmic reticulum	ER retention sequence binding; KDEL sequence binding	membrane; integral component of membrane; endoplasmic reticulum; endoplasmic reticulum membrane; Golgi apparatus; cis-Golgi network; Golgi membrane; cytoplasmic vesicle; COPI-coated vesicle membrane; transport vesicle
DHX36	0.000291842	-0.166432	0.878	0.912	1	DNA duplex unwinding; multicellular organism development; cell differentiation; immune system process; innate immune response; spermatogenesis; defense response to virus; positive regulation of transcription by RNA polymerase II; positive regulation of gene expression; 3'-UTR-mediated mRNA destabilization; regulation of translation; positive regulation of nuclear-transcribed mRNA catabolic proces…	nucleic acid binding; RNA binding; metal ion binding; nucleotide binding; ATP binding; hydrolase activity; DNA binding; helicase activity; magnesium ion binding; DNA helicase activity; RNA helicase activity; protein binding; transcription regulatory region DNA binding; mRNA 3'-UTR binding; RNA polymerase II proximal promoter sequence-specific DNA binding; mRNA 5'-UTR binding; telomerase RNA bindi…	nucleus; cytoplasm; nuclear speck; cytosol; mitochondrion; chromosome; cell projection; dendrite; chromosome, telomeric region; axon; perikaryon; extracellular exosome; cytoplasmic stress granule; membrane; integral component of membrane
CCDC88A	0.000292186	0.269151	0.851	0.825	1	cell migration; regulation of actin cytoskeleton organization; DNA replication; nervous system development; cell projection organization; cytoskeleton-dependent intracellular transport; cytoplasmic microtubule organization; regulation of cell population proliferation; lamellipodium assembly; activation of protein kinase B activity; regulation of protein phosphorylation; positive regulation of cil…	actin binding; protein binding; protein homodimerization activity; microtubule binding; phosphatidylinositol binding; dynein light intermediate chain binding; protein kinase B binding; G-protein gamma-subunit binding	cytoplasm; membrane; endoplasmic reticulum; Golgi apparatus; cytosol; plasma membrane; cytoskeleton; cell projection; cytoplasmic vesicle; ciliary basal body; lamellipodium; centriole; centrosome; COPI-coated Golgi to ER transport vesicle; cell leading edge
RPS20	0.000295965	0.116562	1	0.999	1	translation; viral transcription; translational initiation; nuclear-transcribed mRNA catabolic process, nonsense-mediated decay; SRP-dependent cotranslational protein targeting to membrane	RNA binding; structural constituent of ribosome; protein binding	cytoplasm; membrane; ribosome; small ribosomal subunit; cytosolic small ribosomal subunit; nucleoplasm; cytosol; extracellular exosome; intracellular
QRSL1	0.000299919	-0.138058	0.088	0.169	1	translation; mitochondrial translation; glutaminyl-tRNAGln biosynthesis via transamidation; regulation of protein stability	nucleotide binding; ATP binding; ligase activity; protein binding; carbon-nitrogen ligase activity, with glutamine as amido-N-donor; glutaminyl-tRNA synthase (glutamine-hydrolyzing) activity; amidase activity	mitochondrion; glutamyl-tRNA(Gln) amidotransferase complex
PCMT1	0.00030079	0.17144	0.759	0.682	1	methylation; cellular protein modification process; protein methylation; protein repair	transferase activity; methyltransferase activity; protein binding; protein-L-isoaspartate (D-aspartate) O-methyltransferase activity; cadherin binding	cytoplasm; cytosol; extracellular exosome; extracellular vesicle
ZNF827	0.000301439	0.201213	0.354	0.266	1	regulation of gene expression	nucleic acid binding; metal ion binding; DNA binding; protein binding; RNA polymerase II core promoter sequence-specific DNA binding	nucleus; histone methyltransferase complex
TP53I11	0.000302066	-0.227891	0.53	0.637	1	negative regulation of cell population proliferation		membrane; integral component of membrane
CDC42	0.000302135	0.189171	0.89	0.882	1	cell division; small GTPase mediated signal transduction; protein ubiquitination; cell differentiation; sprouting angiogenesis; cardiac conduction system development; endocytosis; actin filament organization; Golgi organization; regulation of mitotic nuclear division; nuclear migration; Cdc42 protein signal transduction; adherens junction organization; cellular protein localization; establishment…	nucleotide binding; hydrolase activity; GTPase activity; GTP binding; protein binding; protein kinase binding; GTP-dependent protein binding; mitogen-activated protein kinase kinase kinase binding; identical protein binding; thioesterase binding; apolipoprotein A-I receptor binding; GBD domain binding; ubiquitin protein ligase activity	cytoplasm; membrane; plasma membrane; cytoskeleton; cell projection; Golgi membrane; storage vacuole; cytosol; cell-cell junction; secretory granule; leading edge membrane; apical part of cell; phagocytic vesicle; cell periphery; Schaffer collateral - CA1 synapse; focal adhesion; dendrite; centrosome; microtubule organizing center; spindle; midbody; neuron projection; endoplasmic reticulum membra…
TRAPPC3	0.000305708	-0.16333	0.341	0.458	1	Golgi vesicle transport; vesicle-mediated transport; intra-Golgi vesicle-mediated transport; endoplasmic reticulum to Golgi vesicle-mediated transport; COPII vesicle coating	protein binding; Rab guanyl-nucleotide exchange factor activity	Golgi apparatus; cytosol; endoplasmic reticulum; TRAPP complex; Golgi membrane; cis-Golgi network membrane
MXI1	0.000307832	0.24821	0.521	0.447	1	negative regulation of transcription by RNA polymerase II; cytoplasmic sequestering of transcription factor; negative regulation of cell population proliferation	protein dimerization activity; DNA binding; protein binding; DNA-binding transcription factor activity, RNA polymerase II-specific; DNA-binding transcription repressor activity, RNA polymerase II-specific; transcription corepressor activity; RNA polymerase II regulatory region sequence-specific DNA binding	nucleus; nucleolus; cytosol; nuclear chromatin; RNA polymerase II transcription factor complex
HNRNPA2B1	0.000308449	-0.142419	0.942	0.973	1	mRNA processing; RNA splicing; mRNA transport; mRNA export from nucleus; mRNA splicing, via spliceosome; interleukin-12-mediated signaling pathway; RNA metabolic process; primary miRNA processing; G-quadruplex DNA unwinding; RNA transport; positive regulation of telomere maintenance via telomere lengthening; positive regulation of telomerase RNA reverse transcriptase activity; miRNA transport; ne…	nucleic acid binding; RNA binding; protein binding; mRNA binding; mRNA 3'-UTR binding; N6-methyladenosine-containing RNA binding; miRNA binding; G-rich strand telomeric DNA binding; single-stranded telomeric DNA binding; pre-mRNA intronic binding	nucleus; cytoplasm; membrane; nucleoplasm; spliceosomal complex; extracellular region; catalytic step 2 spliceosome; extracellular exosome; ribonucleoprotein complex; chromosome, telomeric region; nuclear matrix; Cajal body
ZNF738	0.000310865	0.203082	0.448	0.365	1	regulation of transcription, DNA-templated; protein polyubiquitination	nucleic acid binding; DNA binding; ubiquitin-protein transferase activity	nucleus; intracellular
ISLR2	0.000315131	-0.152161	0.125	0.215	1	multicellular organism development; nervous system development; positive regulation of axon extension	protein binding	membrane; integral component of membrane; plasma membrane; cell surface
WSB1	0.000315299	0.330552	0.921	0.934	1	protein ubiquitination; intracellular signal transduction; protein polyubiquitination; post-translational protein modification	protein binding	cytosol; intracellular
NEUROD4	0.000327997	-0.190332	0.073	0.147	1	nervous system development; regulation of transcription, DNA-templated; multicellular organism development; cell differentiation; regulation of transcription by RNA polymerase II; neuron development; positive regulation of cell differentiation; amacrine cell differentiation; neuron migration; Notch signaling pathway; neuroblast proliferation; glial cell differentiation; camera-type eye developmen…	protein dimerization activity; DNA binding; DNA-binding transcription factor activity, RNA polymerase II-specific	nucleus; nuclear chromatin
SLC25A36	0.000329851	0.181061	0.735	0.693	1	transmembrane transport; mitochondrion organization; mitochondrial genome maintenance; regulation of mitochondrial membrane potential; pyrimidine nucleotide transport; pyrimidine nucleotide import into mitochondrion	transmembrane transporter activity; pyrimidine nucleotide transmembrane transporter activity	membrane; integral component of membrane; mitochondrial inner membrane; mitochondrion
LINC00461	0.000334021	0.20676	0.909	0.855	1
PSD3	0.000338999	0.261745	0.466	0.384	1	regulation of ARF protein signal transduction	ARF guanyl-nucleotide exchange factor activity; guanyl-nucleotide exchange factor activity; protein binding; phospholipid binding	membrane; plasma membrane; cell projection; cell junction; synapse; postsynaptic membrane; ruffle membrane; postsynaptic density
PHYKPL	0.000342673	-0.102456	0.085	0.168	1	lysine catabolic process; collagen catabolic process	catalytic activity; lyase activity; protein binding; pyridoxal phosphate binding; identical protein binding; transaminase activity	mitochondrion; mitochondrial matrix
KNOP1	0.000344025	-0.214655	0.466	0.568	1		RNA binding	nucleus; nucleolus
ATP1A1	0.000346143	0.170967	0.277	0.194	1	dephosphorylation; ion transport; potassium ion transport; sodium ion transport; establishment or maintenance of transmembrane electrochemical gradient; potassium ion import across plasma membrane; ion transmembrane transport; regulation of cardiac conduction; regulation of sodium ion transport; cardiac muscle cell action potential involved in contraction; cellular sodium ion homeostasis; cellula…	metal ion binding; nucleotide binding; ATP binding; protein binding; potassium transmembrane transporter activity, phosphorylative mechanism; chaperone binding; sodium:potassium-exchanging ATPase activity; potassium ion binding; sodium ion binding; steroid hormone binding; phosphatase activity; protein kinase binding; protein domain specific binding; ankyrin binding; ADP binding; phosphatidylinos…	membrane; integral component of membrane; plasma membrane; melanosome; extracellular exosome; sarcolemma; protein-containing complex; endoplasmic reticulum; sodium:potassium-exchanging ATPase complex; extracellular vesicle; Golgi apparatus; endosome; caveola; postsynaptic density; intercalated disc; basolateral plasma membrane; apical plasma membrane; T-tubule; membrane raft
DBI	0.000349053	0.275864	0.692	0.618	1	acyl-CoA metabolic process; phosphatidylcholine acyl-chain remodeling	fatty-acyl-CoA binding; lipid binding; protein dimerization activity; benzodiazepine receptor binding; long-chain fatty acyl-CoA binding	endoplasmic reticulum; Golgi apparatus; extracellular exosome; endoplasmic reticulum lumen
ELAVL3	0.000349874	0.196989	0.845	0.835	1	multicellular organism development; cell differentiation; nervous system development	nucleic acid binding; RNA binding; mRNA 3'-UTR AU-rich region binding	ribonucleoprotein complex
RIOK3	0.00035539	0.240637	0.567	0.495	1	protein phosphorylation; phosphorylation; immune system process; innate immune response; ribosome biogenesis; defense response to virus; cellular response to virus; positive regulation of interferon-beta production; chromosome segregation; maturation of SSU-rRNA; negative regulation of protein homooligomerization; negative regulation of MDA-5 signaling pathway; negative regulation of I-kappaB kin…	metal ion binding; nucleotide binding; protein serine/threonine kinase activity; ATP binding; kinase activity; transferase activity; protein binding; caspase binding	cytoplasm; preribosome, small subunit precursor; cytosol
SOCS2	0.000367114	0.10421	0.134	0.071	1	protein ubiquitination; intracellular signal transduction; positive regulation of signal transduction; regulation of phosphatidylinositol 3-kinase activity; regulation of cell growth; negative regulation of receptor signaling pathway via JAK-STAT; regulation of growth; post-translational protein modification; phosphatidylinositol phosphorylation; negative regulation of apoptotic process; receptor…	protein binding; insulin-like growth factor receptor binding; JAK pathway signal transduction adaptor activity; 1-phosphatidylinositol-3-kinase regulator activity; SH3/SH2 adaptor activity; growth hormone receptor binding	cytoplasm; cytosol; phosphatidylinositol 3-kinase complex
CCSAP	0.000379579	-0.238324	0.61	0.707	1	cell division; cell cycle; multicellular organism development; regulation of mitotic spindle assembly; regulation of embryonic development; regulation of cilium beat frequency involved in ciliary motility; mitotic spindle microtubule depolymerization	microtubule binding	cytoplasm; cytoskeleton; cell projection; microtubule; centrosome; microtubule organizing center; spindle; cilium; ciliary basal body; axon; centriole; ciliary transition zone; axoneme; mitotic spindle; mitotic spindle astral microtubule
DNAJA1	0.000381416	-0.143275	0.976	0.985	1	negative regulation of apoptotic process; protein folding; positive regulation of ATPase activity; response to heat; positive regulation of apoptotic process; response to unfolded protein; negative regulation of protein ubiquitination; negative regulation of establishment of protein localization to mitochondrion; negative regulation of JUN kinase activity; spermatogenesis; flagellated sperm motil…	metal ion binding; ATP binding; protein binding; unfolded protein binding; heat shock protein binding; chaperone binding; ubiquitin protein ligase binding; low-density lipoprotein particle receptor binding; G protein-coupled receptor binding; ATPase activator activity; Hsp70 protein binding; C3HC4-type RING finger domain binding; Tat protein binding	nucleus; cytoplasm; membrane; cytosol; endoplasmic reticulum; intracellular membrane-bounded organelle; mitochondrion; microtubule cytoskeleton; perinuclear region of cytoplasm; extracellular exosome; cytoplasmic side of endoplasmic reticulum membrane
SLC17A7	0.000384105	-0.19981	0.287	0.394	1	transmembrane transport; ion transport; sodium ion transport; sodium ion transmembrane transport; chloride transmembrane transport; glutamate secretion; L-glutamate transmembrane transport; synaptic transmission, glutamatergic; neurotransmitter transport; regulation of synapse structure or activity; phosphate ion transport; sodium-dependent phosphate transport; neurotransmitter loading into synap…	symporter activity; L-glutamate transmembrane transporter activity; sodium-dependent phosphate transmembrane transporter activity; neurotransmitter transmembrane transporter activity; inorganic phosphate transmembrane transporter activity; extracellularly glutamate-gated chloride channel activity; sodium:inorganic phosphate symporter activity	membrane; integral component of membrane; integral component of plasma membrane; cell junction; cytoplasmic vesicle; synapse; plasma membrane; postsynapse; neuron projection; synaptic vesicle membrane; integral component of synaptic vesicle membrane; clathrin-sculpted glutamate transport vesicle membrane; excitatory synapse; synaptic vesicle; intracellular organelle; cerebellar mossy fiber; presy…
SEC61G	0.000384592	0.253673	0.939	0.958	1	intracellular protein transport; protein transport; protein targeting; protein transmembrane transport; protein targeting to ER	P-P-bond-hydrolysis-driven protein transmembrane transporter activity; protein binding; protein transmembrane transporter activity	cell; membrane; integral component of membrane; endoplasmic reticulum; endoplasmic reticulum membrane; cytosol
HNRNPA1	0.000390105	-0.144511	0.994	0.994	1	mRNA processing; RNA splicing; mRNA transport; mRNA splicing, via spliceosome; viral process; positive regulation of telomere maintenance via telomerase; cellular response to sodium arsenite; fibroblast growth factor receptor signaling pathway; RNA metabolic process; negative regulation of telomere maintenance via telomerase; regulation of alternative mRNA splicing, via spliceosome; RNA export fr…	nucleic acid binding; RNA binding; protein binding; mRNA binding; protein domain specific binding; telomeric repeat-containing RNA binding; single-stranded DNA binding; single-stranded RNA binding; miRNA binding; pre-mRNA binding; G-rich strand telomeric DNA binding	nucleus; cytoplasm; membrane; nucleoplasm; spliceosomal complex; catalytic step 2 spliceosome; extracellular exosome; ribonucleoprotein complex
AK3	0.000394426	0.208091	0.329	0.252	1	phosphorylation; nucleobase-containing compound metabolic process; ADP biosynthetic process; AMP metabolic process; nucleoside monophosphate phosphorylation; GTP metabolic process; blood coagulation; ITP metabolic process; UTP metabolic process	nucleotide binding; ATP binding; kinase activity; transferase activity; GTP binding; protein binding; nucleobase-containing compound kinase activity; phosphotransferase activity, phosphate group as acceptor; nucleoside triphosphate adenylate kinase activity; adenylate kinase activity	mitochondrion; mitochondrial matrix
CRACR2B	0.000406732	0.168403	0.18	0.111	1	store-operated calcium entry; cellular protein localization; regulation of store-operated calcium entry	calcium ion binding; protein binding	cytoplasm
COPS2	0.000409269	0.186461	0.543	0.47	1	signal transduction; transcription by RNA polymerase II; post-translational protein modification; negative regulation of transcription, DNA-templated; protein phosphorylation; protein deneddylation; transcription-coupled nucleotide-excision repair; nucleotide-excision repair, DNA damage recognition; negative regulation of nucleic acid-templated transcription; negative regulation of transcription …	protein binding; transcription corepressor activity	nucleus; cytoplasm; COP9 signalosome; nucleoplasm; cytosol
KLHDC9	0.000413611	0.11294	0.125	0.066	1		cyclin binding; protein binding
PMEPA1	0.000416244	-0.160582	0.149	0.241	1	negative regulation of transforming growth factor beta receptor signaling pathway; negative regulation of SMAD protein complex assembly; androgen receptor signaling pathway; negative regulation of signal transduction; negative regulation of pathway-restricted SMAD protein phosphorylation	protein binding; R-SMAD binding; WW domain binding	membrane; integral component of membrane; intracellular membrane-bounded organelle; Golgi apparatus; Golgi membrane; plasma membrane; endosome; early endosome membrane; endosome membrane
DZIP3	0.000417019	0.17182	0.335	0.249	1	protein ubiquitination; protein polyubiquitination	RNA binding; metal ion binding; transferase activity; protein binding; ubiquitin-protein transferase activity; ubiquitin protein ligase activity; phosphatase binding; polyubiquitin modification-dependent protein binding	cytoplasm
THOC7	0.000425914	0.225175	0.54	0.476	1	mRNA processing; RNA splicing; mRNA transport; mRNA export from nucleus; RNA export from nucleus; mRNA 3'-end processing; viral mRNA export from host cell nucleus	RNA binding; protein binding	nucleus; cytoplasm; nuclear speck; cytosol; THO complex part of transcription export complex; nucleoplasm; nuclear chromosome, telomeric region; transcription export complex; THO complex
COPS9	0.000426539	-0.178576	0.805	0.88	1	positive regulation of cell population proliferation; cellular response to UV; negative regulation of protein neddylation	protein binding	nucleus; cytoplasm; nuclear chromatin; nucleoplasm; COP9 signalosome
LRRCC1	0.000429627	-0.135722	0.107	0.189	1	cell division; cell cycle	protein binding	cytoplasm; cytoskeleton; centrosome; centriole
SVIL	0.000449867	-0.1416	0.25	0.362	1	cytoskeleton organization; positive regulation of cytokinesis; skeletal muscle tissue development	actin binding; actin filament binding; protein binding	nucleus; cytoplasm; membrane; cytosol; plasma membrane; actin cytoskeleton; cytoskeleton; cell projection; cell junction; focal adhesion; midbody; podosome; cleavage furrow; invadopodium; costamere; microtubule minus-end
PAK2	0.000464412	-0.147703	0.841	0.873	1	protein phosphorylation; phosphorylation; negative regulation of apoptotic process; regulation of apoptotic process; metabolic process; apoptotic process; Fc-epsilon receptor signaling pathway; positive regulation of protein tyrosine kinase activity; T cell receptor signaling pathway; regulation of growth; stimulatory C-type lectin receptor signaling pathway; viral process; positive regulation of…	nucleotide binding; protein kinase activity; protein serine/threonine kinase activity; ATP binding; kinase activity; transferase activity; protein binding; catalytic activity; identical protein binding; cadherin binding; protein kinase binding; protein tyrosine kinase activator activity; small GTPase binding; Rac GTPase binding	cytoplasm; nucleus; membrane; perinuclear region of cytoplasm; plasma membrane; cytosol; postsynaptic density; glutamatergic synapse
TMEM163	0.000466062	0.197455	0.305	0.222	1	zinc ion import into synaptic vesicle	zinc ion binding	membrane; integral component of membrane; cell junction; cytoplasmic vesicle; synapse; endosome; early endosome membrane; synaptic vesicle membrane; integral component of synaptic vesicle membrane
FEM1B	0.00047603	0.150128	0.351	0.264	1	protein ubiquitination; apoptotic process; post-translational protein modification; regulation of DNA damage checkpoint; regulation of extrinsic apoptotic signaling pathway via death domain receptors; regulation of ubiquitin-protein transferase activity; epithelial cell maturation; branching involved in prostate gland morphogenesis; epithelial cell maturation involved in prostate gland development	protein binding; ubiquitin-protein transferase activity; death receptor binding	nucleus; cytoplasm; cytosol; nucleoplasm
CAVIN4	0.000477014	0.136737	0.195	0.122	1	regulation of Rho protein signal transduction; multicellular organism development; cell differentiation; muscle organ development; regulation of gene expression; positive regulation of transcription by RNA polymerase II	protein binding	cytoplasm; membrane; cytosol; plasma membrane; caveola; sarcolemma; sarcomere; Z disc
EZR	0.000478157	-0.173762	0.555	0.667	1	phosphatidylinositol-mediated signaling; negative regulation of transcription by RNA polymerase II; positive regulation of gene expression; filopodium assembly; regulation of cell shape; actin filament bundle assembly; axon guidance; establishment of endothelial barrier; cellular response to cAMP; positive regulation of protein secretion; negative regulation of ERK1 and ERK2 cascade; microvillus …	RNA binding; actin binding; protein binding; cytoskeletal protein binding; microtubule binding; identical protein binding; cadherin binding; actin filament binding; protein domain specific binding; S100 protein binding; protein kinase A catalytic subunit binding; protein kinase A regulatory subunit binding; protein kinase A binding; ATPase binding; cell adhesion molecule binding; protein C-termin…	apical part of cell; cytoplasm; membrane; fibrillar center; plasma membrane; extracellular space; cytosol; cytoskeleton; cell projection; perinuclear region of cytoplasm; focal adhesion; endosome; filopodium; extracellular exosome; cell periphery; cell cortex; ruffle membrane; basolateral plasma membrane; protein-containing complex; invadopodium; extrinsic component of membrane; microvillus; brus…
CCND1	0.000479297	0.217601	0.204	0.132	1	positive regulation of protein phosphorylation; cell division; cellular response to DNA damage stimulus; cell cycle; regulation of cyclin-dependent protein serine/threonine kinase activity; negative regulation of transcription by RNA polymerase II; negative regulation of cell cycle arrest; transcription initiation from RNA polymerase II promoter; positive regulation of G2/M transition of mitotic …	protein binding; transcription corepressor activity; protein kinase binding; enzyme binding; transcription factor binding; proline-rich region binding; histone deacetylase binding; protein kinase activity; cyclin-dependent protein serine/threonine kinase regulator activity; kinase activity; protein-containing complex binding	nucleus; cytoplasm; membrane; nucleoplasm; cytosol; nuclear membrane; intracellular; transcriptional repressor complex; cyclin-dependent protein kinase holoenzyme complex; bicellular tight junction
UBE2G1	0.000497141	-0.157936	0.287	0.396	1	protein ubiquitination; ubiquitin-dependent protein catabolic process; protein K48-linked ubiquitination; protein polyubiquitination; protein K63-linked ubiquitination; cellular protein catabolic process	nucleotide binding; ATP binding; transferase activity; ubiquitin-protein transferase activity; ubiquitin conjugating enzyme activity; ubiquitin protein ligase binding	cytosol; extracellular exosome
MAPRE2	0.000497793	0.177193	0.326	0.245	1	cell division; cell cycle; spindle assembly; regulation of microtubule polymerization or depolymerization; positive regulation of ARF protein signal transduction; positive regulation of GTPase activity; positive regulation of keratinocyte migration; positive regulation of adherens junction organization; protein localization to microtubule; protein localization to microtubule plus-end	microtubule binding; protein binding; identical protein binding; microtubule plus-end binding; protein kinase binding	cytoplasm; cytoskeleton; microtubule; microtubule organizing center; cytoplasmic microtubule; microtubule plus-end; spindle midzone; microtubule cytoskeleton; focal adhesion
DDX5	0.000498223	-0.143124	0.979	0.99	1	BMP signaling pathway; mRNA processing; RNA splicing; rhythmic process; mRNA splicing, via spliceosome; nuclear-transcribed mRNA catabolic process; negative regulation of transcription by RNA polymerase II; regulation of transcription by RNA polymerase II; regulation of alternative mRNA splicing, via spliceosome; androgen receptor signaling pathway; intracellular estrogen receptor signaling pathw…	nucleic acid binding; RNA binding; nucleotide binding; ATP binding; hydrolase activity; protein binding; helicase activity; RNA helicase activity; ribonucleoprotein complex binding; R-SMAD binding; mRNA 3'-UTR binding; SMAD binding; androgen receptor binding; promoter-specific chromatin binding; pre-mRNA binding; primary miRNA binding; calmodulin binding; enzyme binding; MH2 domain binding; calci…	nucleus; membrane; spliceosomal complex; catalytic step 2 spliceosome; nucleolus; cytoplasm; nucleoplasm; extracellular exosome; ribonucleoprotein complex
PCDHGB6	0.000499926	-0.162249	0.189	0.284	1	cell adhesion; homophilic cell adhesion via plasma membrane adhesion molecules	calcium ion binding	membrane; integral component of membrane; plasma membrane; integral component of plasma membrane
NKIRAS2	0.000520081	-0.15279	0.332	0.447	1	I-kappaB kinase/NF-kappaB signaling	nucleotide binding; GTPase activity; GTP binding	cytoplasm
PCSK1N	0.000520742	-0.240118	0.631	0.725	1	neuropeptide signaling pathway; negative regulation of endopeptidase activity; response to dietary excess; response to cold; peptide hormone processing	endopeptidase inhibitor activity; signaling receptor binding; serine-type endopeptidase inhibitor activity	Golgi apparatus; extracellular region; extracellular space; trans-Golgi network; secretory granule
TTC9B	0.000521877	0.17291	0.378	0.287	1		protein binding
DRAM2	0.00052517	-0.150626	0.183	0.281	1	regulation of autophagy; photoreceptor cell maintenance; apoptotic process; autophagy; visual perception		cytoplasm; membrane; integral component of membrane; Golgi apparatus; intracellular membrane-bounded organelle; lysosomal membrane; photoreceptor inner segment; apical plasma membrane; plasma membrane; lysosome
ATXN2L	0.000529084	-0.155953	0.299	0.409	1	stress granule assembly; regulation of cytoplasmic mRNA processing body assembly	RNA binding; protein binding; cadherin binding	nucleus; cytoplasm; nuclear speck; membrane; cytosol; cytoplasmic stress granule; integral component of membrane
SCRT2	0.000534669	-0.129609	0.165	0.262	1	regulation of transcription, DNA-templated; negative regulation of transcription by RNA polymerase II; negative regulation of extrinsic apoptotic signaling pathway via death domain receptors; regulation of neuron migration	nucleic acid binding; metal ion binding; DNA binding; DNA-binding transcription factor activity; RNA polymerase II regulatory region sequence-specific DNA binding; DNA-binding transcription repressor activity, RNA polymerase II-specific; E-box binding	nucleus; nuclear chromatin
NSD3	0.000537162	0.148371	0.915	0.853	1	methylation; chromatin organization; histone H3-K36 methylation; positive regulation of transcription, DNA-templated; regulation of transcription, DNA-templated; histone lysine methylation; positive regulation of histone H3-K36 trimethylation; histone methylation	metal ion binding; transferase activity; methyltransferase activity; protein binding; transcription coactivator activity; histone-lysine N-methyltransferase activity; histone methyltransferase activity (H3-K36 specific)	nucleus; chromosome; nucleoplasm; chromatin
GPC6	0.000538336	-0.126053	0.125	0.212	1	regulation of signal transduction; cell migration; retinoid metabolic process; glycosaminoglycan biosynthetic process; glycosaminoglycan catabolic process; Wnt signaling pathway, planar cell polarity pathway; regulation of neurotransmitter receptor localization to postsynaptic specialization membrane; synaptic membrane adhesion; regulation of protein localization to membrane; regulation of presyn…	protein binding; coreceptor activity involved in Wnt signaling pathway, planar cell polarity pathway	nucleus; membrane; extracellular space; plasma membrane; extracellular region; collagen-containing extracellular matrix; anchored component of membrane; anchored component of plasma membrane; cell surface; synapse; lysosomal lumen; Golgi lumen; glutamatergic synapse
GSTO1	0.00053903	0.218181	0.354	0.281	1	regulation of release of sequestered calcium ion into cytosol by sarcoplasmic reticulum; regulation of cardiac muscle contraction by regulation of the release of sequestered calcium ion; oxidation-reduction process; cellular oxidant detoxification; interleukin-12-mediated signaling pathway; cellular response to arsenic-containing substance; glutathione derivative biosynthetic process; negative re…	transferase activity; oxidoreductase activity; protein binding; glutathione transferase activity; glutathione dehydrogenase (ascorbate) activity; methylarsonate reductase activity	cytoplasm; cytosol; extracellular exosome
CETN3	0.000544637	-0.169849	0.271	0.375	1	mRNA transport; protein transport; cell division; cell cycle; centrosome cycle; spindle pole body duplication	metal ion binding; calcium ion binding; protein binding; microtubule binding; G-protein beta/gamma-subunit complex binding	nucleus; cytoplasm; centrosome; cytoskeleton; nuclear pore; transcription export complex 2; nucleolus; microtubule organizing center; centriole; nuclear envelope; nuclear pore nuclear basket; photoreceptor connecting cilium; ciliary transition zone; ciliary basal body
GDF11	0.000545368	0.22246	0.329	0.25	1	skeletal system development; metanephros development; ureteric bud development; negative regulation of cell population proliferation; animal organ morphogenesis; anterior/posterior pattern specification; spinal cord anterior/posterior patterning; pancreas development; negative regulation of cell differentiation; negative regulation of neuron differentiation; cell maturation; camera-type eye morph…	growth factor activity; cytokine activity; protein binding; transforming growth factor beta receptor binding	intracellular membrane-bounded organelle; nucleoplasm; extracellular space; extracellular region; protein-containing complex
EDF1	0.000547189	0.141862	0.963	0.961	1	regulation of lipid metabolic process; multicellular organism development; cell differentiation; positive regulation of transcription, DNA-templated; regulation of transcription, DNA-templated; endothelial cell differentiation; positive regulation of DNA binding	RNA binding; DNA binding; protein binding; transcription coactivator activity; calmodulin binding; TFIID-class transcription factor complex binding; sequence-specific DNA binding	nucleus; cytoplasm; nucleolus; cytosol; intracellular
C1GALT1C1	0.000552303	-0.113254	0.076	0.151	1	O-glycan processing; O-glycan processing, core 1; protein O-linked glycosylation; platelet activation; platelet morphogenesis	protein binding; glycoprotein-N-acetylgalactosamine 3-beta-galactosyltransferase activity	membrane; integral component of membrane; extracellular exosome; Golgi membrane
AMPH	0.000554919	0.137037	0.174	0.107	1	membrane organization; chemical synaptic transmission; synaptic vesicle endocytosis; endocytosis	protein binding; phospholipid binding	cytoplasm; membrane; cytoskeleton; cell junction; cytoplasmic vesicle; synapse; plasma membrane; cytosol; synaptic vesicle; actin cytoskeleton; synaptic vesicle membrane; leading edge membrane
ARX	0.00056266	0.242363	0.174	0.107	1	regulation of transcription, DNA-templated; multicellular organism development; cell differentiation; nervous system development; negative regulation of transcription by RNA polymerase II; neuron migration; axon guidance; positive regulation of gene expression; globus pallidus development; olfactory bulb development; cerebral cortex tangential migration; embryonic olfactory bulb interneuron precu…	DNA binding; sequence-specific DNA binding; DNA-binding transcription factor activity, RNA polymerase II-specific; RNA polymerase II regulatory region sequence-specific DNA binding; RNA polymerase II distal enhancer sequence-specific DNA binding; DNA-binding transcription repressor activity, RNA polymerase II-specific; chromatin binding	nucleus; nuclear chromatin
SMARCD3	0.000567533	-0.138951	0.091	0.167	1	chromatin organization; positive regulation of transcription, DNA-templated; transcription, DNA-templated; nervous system development; nucleosome disassembly; chromatin remodeling; regulation of transcription by RNA polymerase II; regulation of lipid metabolic process; positive regulation of neuroblast proliferation; neural retina development; heart morphogenesis; secondary heart field specificat…	signaling receptor binding; transcription factor binding; transcription coactivator activity; nuclear hormone receptor binding; chromatin binding; protein binding	nucleus; nucleoplasm; SWI/SNF complex; npBAF complex; nBAF complex; nuclear chromatin
SMARCD1	0.000568161	-0.158582	0.436	0.541	1	chromatin organization; nervous system development; nucleosome disassembly; chromatin remodeling; regulation of transcription by RNA polymerase II; chromatin-mediated maintenance of transcription; cellular response to fatty acid	protein binding; transcription coactivator activity; molecular adaptor activity; chromatin binding; signaling receptor binding	nucleus; intracellular membrane-bounded organelle; nucleoplasm; SWI/SNF complex; npBAF complex; nBAF complex
SESN3	0.000585292	-0.15309	0.149	0.236	1	oxidation-reduction process; regulation of response to reactive oxygen species; negative regulation of TORC1 signaling; cellular response to glucose starvation; cellular response to amino acid stimulus; cellular response to amino acid starvation; positive regulation of macroautophagy; cellular response to leucine; cellular response to leucine starvation; response to insulin; TORC2 signaling; gluc…	oxidoreductase activity; protein binding; oxidoreductase activity, acting on peroxide as acceptor; leucine binding	nucleus; cytoplasm; GATOR2 complex; TORC2 complex
GAB1	0.000594292	0.153278	0.204	0.134	1	positive regulation of angiogenesis; vascular endothelial growth factor signaling pathway; axon guidance; positive regulation of phosphatidylinositol 3-kinase signaling; positive regulation of protein kinase B signaling; ERBB2 signaling pathway; angiogenesis; actin cytoskeleton reorganization; epidermal growth factor receptor signaling pathway; insulin receptor signaling pathway; response to hepa…	protein binding; SH3/SH2 adaptor activity	cytosol; cell-cell junction
ZNF277	0.000597032	-0.143347	0.213	0.32	1	cellular response to hydrogen peroxide; regulation of cellular senescence	nucleic acid binding; metal ion binding; DNA binding; RNA polymerase II proximal promoter sequence-specific DNA binding	nucleus
TCF20	0.000597618	-0.120306	0.152	0.247	1	positive regulation of transcription by RNA polymerase II; regulation of transcription, DNA-templated	RNA binding; metal ion binding; DNA binding; protein binding; transcription coactivator activity; DNA-binding transcription factor activity; transcription regulatory region DNA binding	nucleus; nucleoplasm; nuclear body
BTBD6	0.000602076	-0.132789	0.143	0.234	1	post-translational protein modification; neurogenesis	protein binding	cytoplasm; cytosol
ECHS1	0.000604448	0.220592	0.549	0.491	1	lipid metabolic process; fatty acid metabolic process; fatty acid beta-oxidation	catalytic activity; lyase activity; protein binding; enoyl-CoA hydratase activity; isomerase activity	mitochondrion; mitochondrial matrix
AKIRIN2	0.000612028	-0.16986	0.418	0.536	1	multicellular organism development; immune system process; innate immune response; negative regulation of transcription by RNA polymerase II; positive regulation of cell population proliferation; embryo development ending in birth or egg hatching; negative regulation of gene expression; positive regulation of endopeptidase activity; response to lipopolysaccharide; positive regulation of interleuk…	protein binding; enzyme binding	nucleus; nucleoplasm; transcriptional repressor complex
VDAC2	0.000612784	0.143352	0.945	0.934	1	transmembrane transport; inorganic anion transport; anion transmembrane transport; ion transport; anion transport; binding of sperm to zona pellucida; negative regulation of protein polymerization; negative regulation of intrinsic apoptotic signaling pathway	voltage-gated anion channel activity; nucleotide binding; protein binding; porin activity	mitochondrion; mitochondrial outer membrane; nucleus; membrane; integral component of membrane; mitochondrial nucleoid; pore complex; acrosomal vesicle; synaptic vesicle
GTF3C6	0.000616849	-0.165349	0.552	0.646	1	transcription by RNA polymerase III; 5S class rRNA transcription by RNA polymerase III; tRNA transcription by RNA polymerase III	DNA binding; protein binding	nucleus; nucleoplasm; nuclear body; transcription factor TFIIIC complex
NNT-AS1	0.000621379	-0.143219	0.238	0.338	1
DRAXIN	0.000624372	0.242319	0.707	0.654	1	axon guidance; multicellular organism development; Wnt signaling pathway; negative regulation of canonical Wnt signaling pathway; forebrain development; dorsal spinal cord development; commissural neuron differentiation in spinal cord; negative regulation of axon extension; negative regulation of neuron apoptotic process	protein binding	extracellular region
DCK	0.000626751	-0.17527	0.25	0.35	1	phosphorylation; nucleotide biosynthetic process; nucleobase-containing compound metabolic process; deoxyribonucleoside monophosphate biosynthetic process; pyrimidine nucleoside salvage; pyrimidine nucleotide metabolic process; purine-containing compound salvage	nucleotide binding; ATP binding; kinase activity; transferase activity; protein homodimerization activity; nucleoside kinase activity; deoxynucleoside kinase activity; drug binding; deoxycytidine kinase activity	nucleus; cytoplasm; mitochondrion; cytosol
ENHO	0.000629107	-0.162933	0.271	0.372	1	signal transduction; positive regulation of Notch signaling pathway; negative regulation of insulin receptor signaling pathway; negative regulation of insulin secretion; negative regulation of lipid biosynthetic process; negative regulation of RNA polymerase II regulatory region sequence-specific DNA binding	hormone activity	extracellular region; plasma membrane
POMP	0.000641365	0.181375	0.909	0.887	1	proteasome assembly	protein binding	nucleus; cytoplasm; nuclear speck; membrane; endoplasmic reticulum; organelle membrane; intracellular membrane-bounded organelle; cytosol
PTGES3	0.000653925	0.162309	0.936	0.937	1	lipid metabolic process; fatty acid metabolic process; fatty acid biosynthetic process; regulation of cellular response to heat; xenobiotic metabolic process; telomere maintenance; signal transduction; positive regulation of phosphorylation; prostaglandin biosynthetic process; prostaglandin metabolic process; cyclooxygenase pathway; positive regulation of telomerase activity; telomere maintenance…	isomerase activity; protein binding; Hsp90 protein binding; unfolded protein binding; prostaglandin-E synthase activity; telomerase activity; chaperone binding; DNA polymerase binding	nucleus; cytoplasm; cytosol; nucleoplasm; chromosome, telomeric region; protein-containing complex; telomerase holoenzyme complex; chaperone complex
HINT1	0.00065424	0.1081	1	0.993	1	apoptotic process; positive regulation of calcium-mediated signaling; signal transduction; regulation of transcription, DNA-templated; intrinsic apoptotic signaling pathway by p53 class mediator; purine ribonucleotide catabolic process	nucleotide binding; hydrolase activity; catalytic activity; protein kinase C binding	nucleus; cytoplasm; cytosol; plasma membrane; extracellular exosome; histone deacetylase complex; cytoskeleton
RPLP0	0.000656977	-0.109929	1	0.999	1	translation; cytoplasmic translation; ribosome biogenesis; ribosomal large subunit assembly; viral transcription; interleukin-12-mediated signaling pathway; translational initiation; nuclear-transcribed mRNA catabolic process, nonsense-mediated decay; SRP-dependent cotranslational protein targeting to membrane	RNA binding; protein binding; structural constituent of ribosome; large ribosomal subunit rRNA binding	nucleus; cytoplasm; membrane; endoplasmic reticulum; cytosol; ribosome; focal adhesion; cytosolic large ribosomal subunit; extracellular exosome; ribonucleoprotein complex; cytoplasmic ribonucleoprotein granule; postsynaptic density; postsynapse; intracellular
EIF2S2	0.000659998	-0.191022	0.835	0.86	1	translation; translational initiation; transmembrane transport; formation of translation preinitiation complex; in utero embryonic development; formation of cytoplasmic translation initiation complex; male germ cell proliferation; male gonad development	RNA binding; translation initiation factor activity; metal ion binding; protein binding; mRNA binding; translation initiation factor binding; translation factor activity, RNA binding	cytoplasm; cytosol; eukaryotic translation initiation factor 2 complex
NAXE	0.000661863	-0.144057	0.235	0.34	1	nicotinamide nucleotide metabolic process; NAD biosynthesis via nicotinamide riboside salvage pathway	metal ion binding; nucleotide binding; isomerase activity; protein binding; NADHX epimerase activity; NADPHX epimerase activity; identical protein binding	intracellular membrane-bounded organelle; cytosol; nucleoplasm; extracellular space; mitochondrion; extracellular region; extracellular exosome; mitochondrial matrix; cilium; cell body
WBP4	0.000663024	-0.185832	0.46	0.569	1	mRNA processing; RNA splicing; mRNA splicing, via spliceosome; mRNA cis splicing, via spliceosome	nucleic acid binding; zinc ion binding; metal ion binding; protein binding; proline-rich region binding	nucleus; nuclear speck; spliceosomal complex; nucleoplasm; U2-type precatalytic spliceosome
RRAGB	0.000671425	-0.143787	0.174	0.269	1	cellular response to amino acid stimulus; regulation of autophagy; positive regulation of TOR signaling; regulation of TOR signaling; cell cycle arrest; regulation of macroautophagy; cellular response to amino acid starvation; cellular protein localization; cellular response to starvation; cellular response to leucine starvation; positive regulation of TORC1 signaling	nucleotide binding; GTP binding; protein binding; GTPase activity; protein heterodimerization activity; guanyl ribonucleotide binding; GTPase binding	cytoplasm; lysosomal membrane; lysosome; nucleus; EGO complex; cytosol; Gtr1-Gtr2 GTPase complex
DNAJC1	0.000676327	0.172934	0.378	0.292	1	positive regulation of ATPase activity; negative regulation of proteolysis; regulation of protein secretion; regulation of translation; protein folding	DNA binding; protein binding; ATPase activator activity; chaperone binding	nucleus; membrane; integral component of membrane; endoplasmic reticulum; endoplasmic reticulum membrane; organelle membrane; intracellular membrane-bounded organelle; nuclear membrane; plasma membrane
ATP1B1	0.000683548	0.15714	0.784	0.712	1	protein stabilization; cell adhesion; ion transport; potassium ion transport; sodium ion transport; leukocyte migration; establishment or maintenance of transmembrane electrochemical gradient; potassium ion import across plasma membrane; ion transmembrane transport; response to hypoxia; cellular calcium ion homeostasis; regulation of gene expression; regulation of cardiac muscle contraction by ca…	protein binding; sodium:potassium-exchanging ATPase activity; protein C-terminus binding; protein kinase binding; ATPase binding; ATP binding; ATPase activity; MHC class II protein complex binding; potassium ion binding; sodium ion binding; drug binding; ATPase activator activity	membrane; integral component of membrane; plasma membrane; extracellular exosome; sarcolemma; sodium:potassium-exchanging ATPase complex; caveola; intercalated disc; basolateral plasma membrane; apical plasma membrane; extracellular vesicle
BAZ1A	0.000688122	-0.182947	0.552	0.675	1	chromatin remodeling; histone acetylation; regulation of transcription by RNA polymerase II; DNA-dependent DNA replication	metal ion binding; protein binding	nucleus; CHRAC; ACF complex
EPHX1	0.000688945	-0.119403	0.073	0.145	1	xenobiotic metabolic process; response to toxic substance; aromatic compound catabolic process; epoxide metabolic process; cellular aromatic compound metabolic process; response to organic cyclic compound	hydrolase activity; catalytic activity; epoxide hydrolase activity; cis-stilbene-oxide hydrolase activity	membrane; integral component of membrane; endoplasmic reticulum; endoplasmic reticulum membrane; organelle membrane; intracellular membrane-bounded organelle
NFIC	0.000692227	-0.161176	0.186	0.276	1	regulation of transcription, DNA-templated; DNA replication; negative regulation of transcription by RNA polymerase II; positive regulation of transcription by RNA polymerase II; transcription by RNA polymerase II; odontogenesis of dentin-containing tooth; negative regulation of transcription, DNA-templated	DNA binding; DNA-binding transcription factor activity; DNA-binding transcription factor activity, RNA polymerase II-specific; RNA polymerase II proximal promoter sequence-specific DNA binding; DNA-binding transcription activator activity, RNA polymerase II-specific; proximal promoter sequence-specific DNA binding; double-stranded DNA binding	nucleus; intracellular; fibrillar center; nuclear chromatin
MPP6	0.000698363	0.178094	0.247	0.168	1	protein-containing complex assembly	protein binding	membrane; plasma membrane; extracellular exosome
HIGD2A	0.000702167	0.179105	0.689	0.622	1	oxidation-reduction process; negative regulation of apoptotic process		membrane; integral component of membrane; mitochondrial inner membrane; mitochondrion; respirasome; mitochondrial membrane
COPRS	0.000709284	0.154455	0.329	0.248	1	chromatin organization; muscle organ development; histone H4-R3 methylation	protein binding; histone binding	nucleus; cytosol; plasma membrane; nucleoplasm
RAB18	0.000710005	0.161122	0.515	0.447	1	protein transport; multicellular organism development; intracellular protein transport; eye development; Rab protein signal transduction; lipid droplet organization; neutrophil degranulation; brain development; endoplasmic reticulum tubular network organization; small GTPase mediated signal transduction	nucleotide binding; GTPase activity; GTP binding; protein binding; GDP binding	membrane; plasma membrane; Golgi apparatus; endoplasmic reticulum membrane; cytosol; secretory granule membrane; intracellular; endoplasmic reticulum tubular network; synapse
HNRNPF	0.000714075	-0.152651	0.463	0.573	1	mRNA processing; RNA splicing; mRNA splicing, via spliceosome; regulation of RNA splicing; interleukin-12-mediated signaling pathway; fibroblast growth factor receptor signaling pathway; RNA metabolic process; RNA processing	nucleic acid binding; RNA binding; protein binding; single-stranded RNA binding; transcription factor binding; TBP-class protein binding	nucleus; membrane; cytosol; nucleoplasm; spliceosomal complex; catalytic step 2 spliceosome; plasma membrane
ZNF302	0.000720084	-0.190439	0.332	0.433	1	regulation of transcription, DNA-templated	nucleic acid binding; metal ion binding; DNA binding; protein binding	intracellular; nucleus
NAMPT	0.000731657	0.152516	0.326	0.24	1	positive regulation of transcription by RNA polymerase II; signal transduction; rhythmic process; NAD biosynthetic process; pyridine nucleotide biosynthetic process; microglial cell activation; female pregnancy; aging; circadian rhythm; negative regulation of autophagy; response to organic cyclic compound; regulation of lung blood pressure; circadian regulation of gene expression; positive regula…	transferase activity; catalytic activity; transferase activity, transferring glycosyl groups; protein binding; cytokine activity; nicotinate-nucleotide diphosphorylase (carboxylating) activity; drug binding; identical protein binding; protein homodimerization activity; nicotinamide phosphoribosyltransferase activity	nucleus; cytoplasm; nuclear speck; extracellular space; cell junction; extracellular region; plasma membrane; cytosol; extracellular exosome
DCAF7	0.00073193	0.196664	0.561	0.489	1	protein ubiquitination; multicellular organism development; post-translational protein modification	protein binding	nucleus; cytoplasm; cytosol; nucleoplasm; nuclear body; protein-containing complex; nuclear matrix; Cul4-RING E3 ubiquitin ligase complex
SCD	0.000738024	0.252981	0.555	0.493	1	oxidation-reduction process; lipid metabolic process; fatty acid metabolic process; fatty acid biosynthetic process; unsaturated fatty acid biosynthetic process; positive regulation of cold-induced thermogenesis; regulation of cholesterol biosynthetic process; fatty-acyl-CoA biosynthetic process; response to fatty acid	metal ion binding; oxidoreductase activity; protein binding; iron ion binding; stearoyl-CoA 9-desaturase activity; oxidoreductase activity, acting on paired donors, with oxidation of a pair of donors resulting in the reduction of molecular oxygen to two molecules of water; palmitoyl-CoA 9-desaturase activity	membrane; integral component of membrane; endoplasmic reticulum; nucleolus; endoplasmic reticulum membrane; integral component of endoplasmic reticulum membrane
CUL1	0.000739303	-0.173942	0.421	0.543	1	protein ubiquitination; ubiquitin-dependent protein catabolic process; Fc-epsilon receptor signaling pathway; T cell receptor signaling pathway; protein polyubiquitination; stimulatory C-type lectin receptor signaling pathway; negative regulation of G2/M transition of mitotic cell cycle; SCF-dependent proteasomal ubiquitin-dependent protein catabolic process; NIK/NF-kappaB signaling; proteasome-m…	protein binding; ubiquitin protein ligase binding	cullin-RING ubiquitin ligase complex; nucleoplasm; cytosol; SCF ubiquitin ligase complex; Parkin-FBXW7-Cul1 ubiquitin ligase complex
CSRNP3	0.000742943	0.231623	0.527	0.461	1	apoptotic process; positive regulation of transcription by RNA polymerase II; positive regulation of apoptotic process; negative regulation of phosphatase activity	DNA binding; DNA-binding transcription factor activity; DNA-binding transcription factor activity, RNA polymerase II-specific; DNA-binding transcription activator activity, RNA polymerase II-specific; sequence-specific DNA binding	nucleus; nuclear chromatin
PHF23	0.000746513	-0.146675	0.174	0.269	1	autophagy; mitotic chromosome condensation; positive regulation of protein ubiquitination; negative regulation of autophagosome assembly; negative regulation of autophagosome maturation	metal ion binding; chromatin binding; protein binding	nucleus; cytoplasm; nucleoplasm
LSAMP	0.000751253	0.19971	0.204	0.134	1	cell adhesion; nervous system development	protein binding	membrane; cytosol; plasma membrane; extracellular region; anchored component of membrane; integral component of membrane
NCOR1	0.000776336	-0.191587	0.628	0.725	1	chromatin organization; rhythmic process; negative regulation of transcription by RNA polymerase II; negative regulation of transcription, DNA-templated; negative regulation of JNK cascade; transcription by RNA polymerase II; circadian rhythm; regulation of lipid metabolic process; spindle assembly; locomotor rhythm; negative regulation of androgen receptor signaling pathway; regulation of glycol…	transcription regulatory region DNA binding; DNA binding; protein binding; sequence-specific DNA binding; transcription corepressor activity; histone deacetylase binding; chromatin binding; RNA polymerase II activating transcription factor binding; nuclear hormone receptor binding; RNA polymerase II regulatory region DNA binding; thyroid hormone receptor binding	nucleus; membrane; cytosol; nucleoplasm; nuclear chromatin; histone deacetylase complex; mitotic spindle; transcriptional repressor complex; Sin3 complex
VAT1	0.00077909	0.183664	0.29	0.212	1	oxidation-reduction process; neutrophil degranulation; negative regulation of mitochondrial fusion	zinc ion binding; oxidoreductase activity	cytoplasm; membrane; mitochondrion; mitochondrial outer membrane; extracellular region; extracellular exosome; integral component of membrane; azurophil granule lumen
ARPC5	0.000787218	-0.203531	0.634	0.736	1	regulation of actin filament polymerization; Arp2/3 complex-mediated actin nucleation; Fc-gamma receptor signaling pathway involved in phagocytosis; cell migration; neutrophil degranulation; membrane organization; ephrin receptor signaling pathway; actin cytoskeleton organization; smooth muscle cell migration; orbitofrontal cortex development; maintenance of cell polarity; actin filament network …	actin binding; protein binding; actin filament binding; structural constituent of cytoskeleton	nucleus; cytoplasm; actin cytoskeleton; cytoskeleton; cell projection; Arp2/3 protein complex; focal adhesion; extracellular region; cytosol; extracellular exosome; site of double-strand break; secretory granule lumen; ficolin-1-rich granule lumen; endosome; lamellipodium; growth cone; neuron projection
CHD4	0.000790796	0.151576	0.784	0.689	1	chromatin organization; DNA duplex unwinding; regulation of signal transduction by p53 class mediator; regulation of transcription by RNA polymerase II; ATP-dependent chromatin remodeling	metal ion binding; ATP binding; RNA polymerase II repressing transcription factor binding; histone deacetylase binding; nucleotide binding; hydrolase activity; DNA binding; protein binding; DNA helicase activity; helicase activity; RNA polymerase II distal enhancer sequence-specific DNA binding; RNA polymerase II proximal promoter sequence-specific DNA binding; zinc ion binding; nucleosomal DNA b…	nucleus; NuRD complex; cytoplasm; membrane; nuclear chromatin; cytoskeleton; nucleoplasm; centrosome; microtubule organizing center; protein-containing complex
PSMA6	0.000793073	0.192788	0.841	0.797	1	proteolysis; ubiquitin-dependent protein catabolic process; proteolysis involved in cellular protein catabolic process; Fc-epsilon receptor signaling pathway; T cell receptor signaling pathway; MAPK cascade; protein polyubiquitination; stimulatory C-type lectin receptor signaling pathway; antigen processing and presentation of exogenous peptide antigen via MHC class I, TAP-dependent; regulation o…	RNA binding; hydrolase activity; protein binding; peptidase activity; endopeptidase activity; threonine-type endopeptidase activity; NF-kappaB binding; purine ribonucleoside triphosphate binding	nucleus; cytoplasm; nucleoplasm; proteasome complex; proteasome core complex; proteasome core complex, alpha-subunit complex; P-body; cytosol; extracellular exosome; nuclear matrix; myofibril; sarcomere; polysome
LMAN1	0.000799267	0.178129	0.506	0.423	1	protein transport; endoplasmic reticulum to Golgi vesicle-mediated transport; vesicle-mediated transport; Golgi organization; blood coagulation; COPII vesicle coating; endoplasmic reticulum organization; positive regulation of organelle organization; protein folding; protein N-linked glycosylation via asparagine; negative regulation of protein targeting to mitochondrion	metal ion binding; carbohydrate binding; protein binding; mannose binding; unfolded protein binding	membrane; integral component of membrane; cytosol; endoplasmic reticulum; endoplasmic reticulum membrane; Golgi apparatus; cytoplasm; Golgi membrane; endoplasmic reticulum-Golgi intermediate compartment; COPII-coated ER to Golgi transport vesicle; extracellular exosome; collagen-containing extracellular matrix; ER to Golgi transport vesicle membrane; endoplasmic reticulum-Golgi intermediate compa…
FSTL5	0.000802148	0.181901	0.125	0.069	1	cell differentiation; multicellular organism development	metal ion binding; calcium ion binding; protein binding	extracellular region
HSPA8	0.000826672	-0.168613	0.89	0.936	1	mRNA processing; RNA splicing; protein refolding; vesicle-mediated transport; cellular response to heat; response to unfolded protein; regulation of mRNA stability; viral process; regulation of cellular response to heat; neutrophil degranulation; protein folding; negative regulation of transcription, DNA-templated; membrane organization; cytokine-mediated signaling pathway; neurotransmitter secre…	RNA binding; nucleotide binding; ATP binding; protein binding; unfolded protein binding; ATPase activity; cadherin binding; chaperone binding; enzyme binding; ubiquitin protein ligase binding; ATPase activity, coupled; G protein-coupled receptor binding; heat shock protein binding; MHC class II protein complex binding; protein folding chaperone; misfolded protein binding; C3HC4-type RING finger d…	nucleus; cytoplasm; membrane; extracellular space; cytosol; plasma membrane; spliceosomal complex; melanosome; nucleolus; focal adhesion; extracellular region; lysosome; nucleoplasm; extracellular exosome; blood microparticle; autophagosome; ribonucleoprotein complex; axon; dendrite; secretory granule lumen; ficolin-1-rich granule lumen; terminal bouton; chaperone complex; lysosomal lumen; lumena…
CHRNA3	0.000830095	-0.112854	0.113	0.197	1	ion transport; signal transduction; ion transmembrane transport; nervous system development; chemical synaptic transmission; synaptic transmission, cholinergic; regulation of membrane potential; nervous system process; neuromuscular synaptic transmission; regulation of smooth muscle contraction; locomotory behavior; regulation of dendrite morphogenesis; response to nicotine; behavioral response t…	ion channel activity; transmembrane signaling receptor activity; extracellular ligand-gated ion channel activity; acetylcholine-gated cation-selective channel activity; protein binding; acetylcholine receptor activity; acetylcholine binding; ligand-gated ion channel activity	membrane; integral component of membrane; plasma membrane; cell junction; synapse; postsynaptic membrane; dendrite; integral component of plasma membrane; acetylcholine-gated channel complex; neuron projection; postsynaptic density; neuronal cell body; plasma membrane raft
CWC15	0.000836081	0.147911	0.732	0.665	1	mRNA processing; RNA splicing; mRNA splicing, via spliceosome; mRNA cis splicing, via spliceosome	RNA binding; protein binding	nucleus; nuclear speck; mitochondrion; spliceosomal complex; catalytic step 2 spliceosome; nucleoplasm; U2-type catalytic step 2 spliceosome
EPN2	0.000845204	-0.152303	0.302	0.413	1	endocytosis; negative regulation of sprouting angiogenesis; positive regulation of Notch signaling pathway; membrane organization; negative regulation of vascular endothelial growth factor receptor signaling pathway	lipid binding; protein binding; cadherin binding	clathrin coat of endocytic vesicle; cytoplasm; intracellular membrane-bounded organelle; cytoplasmic vesicle; clathrin-coated vesicle; cytosol
ATN1	0.000848162	-0.146586	0.259	0.363	1	negative regulation of transcription by RNA polymerase II; central nervous system development; neuron apoptotic process	protein binding; DNA binding; transcription corepressor activity; protein domain specific binding; RNA polymerase II transcription factor binding	nucleus; cytoplasm; nucleoplasm; perinuclear region of cytoplasm; cell junction; nuclear matrix
PLD3	0.000853378	-0.15716	0.582	0.686	1	lipid metabolic process; lipid catabolic process	hydrolase activity; catalytic activity; protein binding; phospholipase D activity; N-acylphosphatidylethanolamine-specific phospholipase D activity	membrane; integral component of membrane; endoplasmic reticulum; endoplasmic reticulum membrane; extracellular exosome
PLXNA4	0.000860541	-0.178791	0.165	0.253	1	signal transduction; semaphorin-plexin signaling pathway; nervous system development; axon guidance; motor neuron axon guidance; cranial nerve morphogenesis; facial nerve morphogenesis; facial nerve structural organization; glossopharyngeal nerve morphogenesis; trigeminal nerve morphogenesis; trigeminal nerve structural organization; vagus nerve morphogenesis; postganglionic parasympathetic fiber…	semaphorin receptor activity; protein binding	membrane; integral component of membrane; plasma membrane; integral component of plasma membrane; semaphorin receptor complex
KBTBD6	0.00087205	0.165054	0.28	0.207	1	post-translational protein modification	protein binding	cytosol
NPC2	0.000875027	-0.119856	0.268	0.373	1	intracellular cholesterol transport; lipid metabolic process; steroid metabolic process; lipid transport; cholesterol metabolic process; response to virus; neutrophil degranulation; cholesterol transport; cholesterol efflux; low-density lipoprotein particle clearance; cholesterol homeostasis; phospholipid transport; sterol transport; regulation of isoprenoid metabolic process; intracellular stero…	protein binding; enzyme binding; cholesterol binding; cholesterol transfer activity; sterol binding	cell; endoplasmic reticulum; extracellular space; extracellular region; lysosome; extracellular exosome; lysosomal lumen; azurophil granule lumen
DAD1	0.000879765	0.192701	0.79	0.773	1	apoptotic process; protein glycosylation; protein N-linked glycosylation; negative regulation of apoptotic process; protein N-linked glycosylation via asparagine; blastocyst development; response to nutrient; response to drug	dolichyl-diphosphooligosaccharide-protein glycotransferase activity; oligosaccharyl transferase activity	membrane; integral component of membrane; endoplasmic reticulum; endoplasmic reticulum membrane; oligosaccharyltransferase complex
FXYD6	0.00087997	-0.183375	0.732	0.815	1	ion transport; regulation of ion transport; regulation of sodium ion transmembrane transporter activity; ion transmembrane transport; regulation of cardiac conduction	protein binding; ion channel regulator activity; sodium channel regulator activity	membrane; integral component of membrane; plasma membrane; glutamatergic synapse; integral component of postsynaptic membrane; integral component of presynaptic membrane
FAM217B	0.000888707	-0.1459	0.28	0.383	1			cytosol; nucleoplasm
SPNS1	0.000892	-0.113336	0.101	0.179	1	transmembrane transport; lipid transport	protein binding	membrane; integral component of membrane; integral component of plasma membrane; mitochondrial inner membrane; mitochondrion; lysosomal membrane
RGMA	0.000895808	-0.128745	0.143	0.232	1	positive regulation of transcription by RNA polymerase II; BMP signaling pathway; regulation of neuron projection development; negative regulation of axon regeneration; neural tube closure; positive regulation of neuron projection development; negative regulation of neuron projection development; regulation of BMP signaling pathway; neuron projection development; positive regulation of GTPase act…	protein binding; coreceptor activity; transferrin receptor binding; signaling receptor binding	membrane; plasma membrane; anchored component of membrane; endoplasmic reticulum; cell surface; neuron projection
MED29	0.000896645	-0.134021	0.134	0.216	1		protein binding	mediator complex; nucleus; nucleoplasm
BAG6	0.000900178	0.164675	0.494	0.416	1	chromatin organization; apoptotic process; ubiquitin-dependent protein catabolic process; cell differentiation; kidney development; immune system process; spermatogenesis; protein stabilization; synaptonemal complex assembly; negative regulation of proteasomal ubiquitin-dependent protein catabolic process; ubiquitin-dependent ERAD pathway; natural killer cell activation; brain development; ER-ass…	protein binding; ribosome binding; ubiquitin protein ligase binding; signaling receptor binding; proteasome binding; ubiquitin-specific protease binding; misfolded protein binding; polyubiquitin modification-dependent protein binding; Hsp70 protein binding	nucleus; cytoplasm; membrane; intracellular membrane-bounded organelle; cytosol; nucleoplasm; extracellular region; extracellular exosome; BAT3 complex
DBP	0.000904791	0.109812	0.113	0.061	1	positive regulation of transcription by RNA polymerase II; regulation of transcription, DNA-templated; regulation of transcription by RNA polymerase II; circadian rhythm; rhythmic process; liver development	DNA binding; DNA-binding transcription factor activity; RNA polymerase II regulatory region sequence-specific DNA binding; DNA-binding transcription factor activity, RNA polymerase II-specific; DNA-binding transcription activator activity, RNA polymerase II-specific	nucleus; nuclear chromatin
TAGLN3	0.000939607	-0.169103	0.848	0.908	1	central nervous system development; negative regulation of transcription by RNA polymerase II	protein binding; actin filament binding	nucleus
FAM20C	0.000939773	-0.104757	0.073	0.142	1	phosphorylation; protein phosphorylation; biomineral tissue development; cellular protein metabolic process; post-translational protein modification; skeletal system development; positive regulation of bone mineralization; osteoclast maturation; regulation of fibroblast growth factor receptor signaling pathway; positive regulation of osteoblast differentiation; ATP metabolic process; regulation o…	metal ion binding; nucleotide binding; protein serine/threonine kinase activity; ATP binding; kinase activity; transferase activity; protein binding; manganese ion binding; phosphotransferase activity, alcohol group as acceptor; calcium ion binding	Golgi apparatus; extracellular space; extracellular region; extracellular exosome; endoplasmic reticulum lumen; cytoplasm
SHD	0.000941253	0.180848	0.238	0.165	1		protein binding; phosphotyrosine residue binding
GFPT1	0.00096487	0.180905	0.409	0.337	1	rhythmic process; UDP-N-acetylglucosamine biosynthetic process; circadian regulation of gene expression; glutamine metabolic process; carbohydrate derivative metabolic process; carbohydrate derivative biosynthetic process; protein N-linked glycosylation; fructose 6-phosphate metabolic process; IRE1-mediated unfolded protein response; UDP-N-acetylglucosamine metabolic process; energy reserve metab…	transferase activity; transaminase activity; carbohydrate derivative binding; glutamine-fructose-6-phosphate transaminase (isomerizing) activity	cytosol; extracellular exosome
LINC00205	0.000969902	-0.12706	0.183	0.271	1
OST4	0.00100276	0.121774	0.887	0.902	1	protein glycosylation; protein N-linked glycosylation via asparagine		membrane; integral component of membrane; endoplasmic reticulum; endoplasmic reticulum membrane; oligosaccharyltransferase complex
PM20D2	0.00100513	0.108364	0.137	0.08	1	proteolysis; regulation of cellular protein metabolic process	hydrolase activity; dipeptidase activity	nucleoplasm
PHYHIPL	0.00100886	0.126391	0.427	0.332	1		protein binding	cytoplasm
EPB41	0.00101281	0.197793	0.308	0.232	1	cortical actin cytoskeleton organization; cell division; cell cycle; actomyosin structure organization; actin cytoskeleton organization; regulation of calcium ion transport; positive regulation of protein binding; positive regulation of protein localization to cell cortex; regulation of cell shape; regulation of intestinal absorption; protein-containing complex assembly	actin binding; structural molecule activity; cytoskeletal protein binding; calmodulin binding; protein binding; structural constituent of cytoskeleton; 1-phosphatidylinositol binding; protein N-terminus binding; protein C-terminus binding; spectrin binding; phosphoprotein binding	cytoskeleton; membrane; integral component of membrane; nucleus; cytoplasm; cytosol; plasma membrane; cell junction; cell cortex; basolateral plasma membrane; protein-containing complex; cell cortex region; spectrin-associated cytoskeleton; cortical cytoskeleton; cytoplasmic side of plasma membrane; postsynaptic density
UQCRB	0.00101702	0.143273	0.985	0.988	1	oxidation-reduction process; mitochondrial electron transport, ubiquinol to cytochrome c; aerobic respiration; oxidative phosphorylation; mitochondrial respiratory chain complex III assembly	protein binding; ubiquinol-cytochrome-c reductase activity	membrane; mitochondrial inner membrane; mitochondrion; respirasome; mitochondrial respiratory chain complex III; mitochondrial respirasome
EEF1A2	0.00103526	-0.129528	0.768	0.842	1	translation; translational elongation; regulation of chaperone-mediated autophagy; response to inorganic substance; positive regulation of apoptotic process; response to electrical stimulus; positive regulation of lipid kinase activity	nucleotide binding; GTPase activity; GTP binding; protein binding; translation elongation factor activity; protein kinase binding; translation factor activity, RNA binding	cytoplasm; cytoplasmic side of lysosomal membrane; eukaryotic translation elongation factor 1 complex; neuronal cell body; synapse
TOB2	0.00104841	-0.143473	0.204	0.3	1	negative regulation of nucleic acid-templated transcription; negative regulation of cell population proliferation; regulation of gene expression; female gamete generation; negative regulation of osteoclast differentiation; positive regulation of ossification	protein binding; transcription corepressor activity; vitamin D receptor binding	cytoplasm; cytosol; nucleus
CXADR	0.00107725	0.253277	0.646	0.599	1	cell adhesion; viral entry into host cell; regulation of immune response; leukocyte migration; neutrophil chemotaxis; mitochondrion organization; heart development; viral process; actin cytoskeleton reorganization; heterophilic cell-cell adhesion via plasma membrane cell adhesion molecules; cardiac muscle fiber development; regulation of AV node cell action potential; cell-cell junction organizat…	protein binding; integrin binding; beta-catenin binding; PDZ domain binding; virus receptor activity; cell adhesion molecule binding; connexin binding; cell adhesive protein binding involved in AV node cell-bundle of His cell communication	membrane; integral component of membrane; nucleoplasm; plasma membrane; cell junction; extracellular region; membrane raft; integral component of plasma membrane; bicellular tight junction; filopodium; growth cone; acrosomal vesicle; basolateral plasma membrane; protein-containing complex; adherens junction; cell-cell adherens junction; neuron projection; cell-cell junction; apicolateral plasma m…
PHLDA3	0.00108388	-0.116096	0.125	0.21	1	apoptotic process; positive regulation of apoptotic process; anatomical structure morphogenesis; negative regulation of protein kinase B signaling; intrinsic apoptotic signaling pathway in response to DNA damage by p53 class mediator	phosphatidylinositol-5-phosphate binding; phosphatidylinositol-3-phosphate binding; phosphatidylinositol-3,5-bisphosphate binding; phosphatidylinositol-4,5-bisphosphate binding; phosphatidylinositol-3,4,5-trisphosphate binding; phosphatidylinositol-3,4-bisphosphate binding	cytoplasm; membrane; plasma membrane
ZNF583	0.00108409	-0.105895	0.137	0.225	1	regulation of transcription, DNA-templated	nucleic acid binding; metal ion binding; DNA binding	intracellular; nucleus
APPL1	0.00110298	0.155307	0.534	0.451	1	signal transduction; cell cycle; cell population proliferation; insulin receptor signaling pathway; protein import into nucleus; transforming growth factor beta receptor signaling pathway; positive regulation of melanin biosynthetic process; positive regulation of glucose import; regulation of glucose import; regulation of innate immune response; regulation of protein localization to plasma membr…	protein homodimerization activity; protein binding; identical protein binding; phosphatidylinositol binding; protein-containing complex binding; phosphatidylserine binding; beta-tubulin binding; protein kinase B binding	nucleus; cytoplasm; membrane; plasma membrane; cell projection; cytoplasmic vesicle; endosome; early endosome; extracellular exosome; early endosome membrane; endosome membrane; cytosol; ruffle; vesicle membrane; early phagosome; phagocytic vesicle; intracellular vesicle; macropinosome
MORF4L1	0.00111322	0.156327	0.939	0.916	1	regulation of transcription, DNA-templated; chromatin organization; DNA repair; DNA recombination; cellular response to DNA damage stimulus; regulation of growth; histone H4 acetylation; double-strand break repair via homologous recombination; histone deacetylation; chromatin silencing; histone H2A acetylation; histone acetylation; cell population proliferation	protein binding; protein N-terminus binding; chromatin binding	nucleus; nuclear speck; NuA4 histone acetyltransferase complex; Sin3 complex; nucleoplasm; histone acetyltransferase complex
DTYMK	0.00113791	-0.115184	0.168	0.255	1	phosphorylation; nucleoside diphosphate phosphorylation; nucleoside monophosphate phosphorylation; nucleotide biosynthetic process; dTDP biosynthetic process; nucleobase-containing small molecule interconversion; dTTP biosynthetic process; dUDP biosynthetic process; response to estrogen; myoblast differentiation; thymidine biosynthetic process; response to cadmium ion; cellular response to growth…	nucleotide binding; ATP binding; kinase activity; transferase activity; thymidylate kinase activity; nucleoside diphosphate kinase activity; uridylate kinase activity	nucleus; cytoplasm; mitochondrion; cytosol; mitochondrial intermembrane space; mitochondrial matrix
RPIA	0.00115696	-0.103202	0.095	0.17	1	pentose-phosphate shunt; pentose-phosphate shunt, non-oxidative branch; D-ribose metabolic process; ribose phosphate metabolic process	isomerase activity; protein binding; identical protein binding; ribose-5-phosphate isomerase activity; carbohydrate binding; monosaccharide binding	intracellular membrane-bounded organelle; cytosol
HYMAI	0.00115788	0.105001	0.101	0.052	1
MZT1	0.0011605	0.160437	0.29	0.218	1	mitotic spindle assembly; gamma-tubulin complex localization; microtubule nucleation by interphase microtubule organizing center	protein binding	cytoplasm; cytoskeleton; centrosome; microtubule organizing center; spindle; cytosol; gamma-tubulin ring complex; interphase microtubule organizing center
VPS35	0.00117544	0.162082	0.716	0.656	1	protein transport; intracellular protein transport; retrograde transport, endosome to Golgi; viral process; retrograde transport, endosome to plasma membrane; positive regulation of mitochondrial fission; Wnt signaling pathway; regulation of macroautophagy; negative regulation of neuron death; positive regulation of gene expression; regulation of mitochondrion organization; regulation of protein …	protein binding; D1 dopamine receptor binding	cytoplasm; membrane; lysosomal membrane; cytosol; endosome; lysosome; early endosome; extracellular exosome; late endosome; mitochondrion-derived vesicle; mitochondrion; retromer complex; endosome membrane; retromer, cargo-selective complex; tubular endosome; postsynaptic density; neuron projection; neuronal cell body; perinuclear region of cytoplasm; presynapse; postsynapse; glutamatergic synapse
ADIPOR2	0.00119525	-0.135404	0.134	0.213	1	lipid metabolic process; fatty acid metabolic process; hormone-mediated signaling pathway; positive regulation of cold-induced thermogenesis; glucose homeostasis; regulation of fatty acid biosynthetic process; fatty acid oxidation; vascular wound healing; adiponectin-activated signaling pathway; heart development; female pregnancy; response to nutrient; negative regulation of cell growth; positiv…	metal ion binding; signaling receptor activity; identical protein binding; protein heterodimerization activity; adiponectin binding; adipokinetic hormone receptor activity	membrane; integral component of membrane; plasma membrane; intrinsic component of plasma membrane
CDKN2D	0.00119543	0.203849	0.57	0.493	1	negative regulation of cell population proliferation; negative regulation of cysteine-type endopeptidase activity involved in apoptotic process; phosphorylation; cell cycle; sensory perception of sound; negative regulation of cell cycle G1/S phase transition; negative regulation of cyclin-dependent protein serine/threonine kinase activity; response to retinoic acid; negative regulation of cell gr…	kinase activity; protein binding; protein kinase binding; cyclin-dependent protein serine/threonine kinase inhibitor activity	cytoplasm; nucleus; cytosol; nucleoplasm; cyclin D2-CDK4 complex
UPF3B	0.00121788	-0.127817	0.473	0.584	1	nuclear-transcribed mRNA catabolic process, nonsense-mediated decay; mRNA transport; positive regulation of translation; mRNA export from nucleus; RNA export from nucleus; mRNA 3'-end processing; mRNA splicing, via spliceosome	nucleic acid binding; RNA binding; protein binding; mRNA binding; structural constituent of nuclear pore	nucleus; cytoplasm; nucleolus; cytosol; microtubule organizing center; nucleoplasm; exon-exon junction complex
RAB33B	0.00122128	0.115721	0.131	0.076	1	Rab protein signal transduction; protein transport; autophagy; intra-Golgi vesicle-mediated transport; intracellular protein transport; protein localization to Golgi apparatus; skeletal system morphogenesis; regulation of Golgi organization; autophagosome assembly; negative regulation of constitutive secretory pathway; regulation of retrograde vesicle-mediated transport, Golgi to ER	GTPase activity; GTP binding; nucleotide binding; protein binding	membrane; Golgi apparatus; Golgi membrane; Golgi lumen; presynapse
RASSF2	0.00122551	-0.105204	0.082	0.153	1	protein stabilization; signal transduction; regulation of apoptotic process; protein phosphorylation; cell cycle; positive regulation of apoptotic process; positive regulation of protein kinase activity; skeletal system development; ossification; positive regulation of protein autophosphorylation; negative regulation of peptidyl-serine phosphorylation; epidermal growth factor receptor signaling p…	protein binding; protein kinase activity	cytoplasm; nucleus; Golgi apparatus; cytosol; nucleoplasm; plasma membrane; chromosome; chromosome, centromeric region; kinetochore; condensed chromosome kinetochore; protein-containing complex
HIC2	0.00122597	0.127501	0.223	0.148	1	regulation of transcription by RNA polymerase II; negative regulation of transcription, DNA-templated	nucleic acid binding; metal ion binding; DNA binding; DNA-binding transcription factor activity, RNA polymerase II-specific; protein C-terminus binding; protein binding	nucleus
NECAB3	0.00123509	0.117442	0.183	0.118	1	protein secretion; regulation of amyloid precursor protein biosynthetic process; protein metabolic process	metal ion binding; calcium ion binding; protein binding	nucleus; cytoplasm; Golgi apparatus; endoplasmic reticulum membrane; endoplasmic reticulum; Golgi cis cisterna
PSMC1	0.00124215	0.142484	0.674	0.618	1	Fc-epsilon receptor signaling pathway; protein catabolic process; T cell receptor signaling pathway; positive regulation of proteasomal protein catabolic process; MAPK cascade; protein polyubiquitination; stimulatory C-type lectin receptor signaling pathway; antigen processing and presentation of exogenous peptide antigen via MHC class I, TAP-dependent; regulation of cellular amino acid metabolic…	RNA binding; nucleotide binding; ATP binding; hydrolase activity; protein binding; proteasome-activating ATPase activity; ATPase activity; TBP-class protein binding	nucleus; cytoplasm; membrane; cytosol; nucleoplasm; proteasome complex; proteasome accessory complex; proteasome regulatory particle, base subcomplex; proteasome regulatory particle
PNN	0.0012531	0.184871	0.89	0.897	1	mRNA processing; RNA splicing; mRNA splicing, via spliceosome; cell adhesion	RNA binding; DNA binding; protein binding; structural molecule activity	nucleus; nuclear speck; membrane; spliceosomal complex; cell junction; catalytic step 2 spliceosome; plasma membrane; exon-exon junction complex; cell-cell junction; desmosome; intermediate filament
STX16	0.00126966	0.168773	0.305	0.23	1	intracellular protein transport; vesicle-mediated transport; protein transport; retrograde transport, endosome to Golgi; vesicle fusion; vesicle docking; Golgi ribbon formation	protein binding; SNAP receptor activity; SNARE binding; syntaxin binding	intracellular membrane-bounded organelle; membrane; SNARE complex; cytoplasm; integral component of membrane; cytosol; Golgi apparatus; Golgi membrane; perinuclear region of cytoplasm; focal adhesion; trans-Golgi network; endomembrane system; trans-Golgi network membrane; Golgi cisterna
CLIP1	0.00127915	-0.122993	0.332	0.437	1	microtubule bundle formation; mitotic cell cycle; positive regulation of microtubule polymerization; protein transport into plasma membrane raft	metal ion binding; zinc ion binding; protein homodimerization activity; protein binding; microtubule binding; tubulin binding; microtubule plus-end binding	cytoplasm; membrane; cytoskeleton; cell projection; cytoplasmic vesicle; microtubule; cytoplasmic vesicle membrane; centrosome; kinetochore; cytosol; microtubule cytoskeleton; ruffle; endosome; intermediate filament; microtubule plus-end; macropinosome; nuclear envelope; cytoplasmic microtubule
PARK7	0.00129342	0.110052	0.957	0.947	1	proteolysis; DNA repair; cellular response to DNA damage stimulus; single fertilization; inflammatory response; autophagy; cellular oxidant detoxification; mitochondrion organization; protein stabilization; positive regulation of protein kinase B signaling; negative regulation of protein binding; positive regulation of transcription by RNA polymerase II; cellular response to hydrogen peroxide; ne…	RNA binding; hydrolase activity; protein homodimerization activity; protein binding; peptidase activity; identical protein binding; mRNA binding; cadherin binding; signaling receptor binding; copper ion binding; transcription factor binding; kinase binding; enzyme binding; protein-containing complex binding; ubiquitin-specific protease binding; repressing transcription factor binding; scaffold pr…	perinuclear region of cytoplasm; nucleus; cytoplasm; membrane; cytosol; presynapse; mitochondrion; plasma membrane; membrane raft; nucleoplasm; extracellular exosome; cell-cell adherens junction; chromatin; axon; PML body; mitochondrial intermembrane space; mitochondrial matrix; endoplasmic reticulum; neuron projection; cell body
CETN2	0.00131156	0.184286	0.396	0.319	1	mRNA transport; protein transport; cell division; DNA repair; cellular response to DNA damage stimulus; cell cycle; mitotic cell cycle; G2/M transition of mitotic cell cycle; regulation of G2/M transition of mitotic cell cycle; ciliary basal body-plasma membrane docking; centriole replication; regulation of cytokinesis; nucleotide-excision repair; global genome nucleotide-excision repair; nucleot…	metal ion binding; calcium ion binding; protein binding; microtubule binding; G-protein beta/gamma-subunit complex binding; heterotrimeric G-protein binding	nucleus; cytoplasm; cytoskeleton; nuclear pore; transcription export complex 2; centrosome; microtubule organizing center; nucleoplasm; cytosol; centriole; nuclear envelope; nuclear pore nuclear basket; intracellular; cilium; photoreceptor connecting cilium; ciliary basal body; XPC complex
GNAQ	0.00134325	0.1919	0.579	0.521	1	protein stabilization; negative regulation of protein kinase activity; G protein-coupled receptor signaling pathway; signal transduction; positive regulation of GTPase activity; G protein-coupled acetylcholine receptor signaling pathway; phototransduction, visible light; entrainment of circadian clock; adenylate cyclase-modulating G protein-coupled receptor signaling pathway; blood coagulation; p…	metal ion binding; nucleotide binding; GTPase activity; GTP binding; G protein-coupled receptor binding; protein binding; guanyl nucleotide binding; G-protein beta/gamma-subunit complex binding; GTPase activator activity; type 2A serotonin receptor binding	nucleus; membrane; lysosomal membrane; heterotrimeric G-protein complex; photoreceptor outer segment; plasma membrane; extracellular exosome; nuclear membrane; cytoplasm
TRIB3	0.00134562	-0.223124	0.192	0.276	1	negative regulation of nucleic acid-templated transcription; negative regulation of fat cell differentiation; negative regulation of fatty acid biosynthetic process; cellular response to insulin stimulus; negative regulation of protein kinase activity; protein phosphorylation; apoptotic process; positive regulation of proteasomal ubiquitin-dependent protein catabolic process; negative regulation …	transcription corepressor activity; ATP binding; protein binding; protein kinase inhibitor activity; protein kinase binding; ubiquitin protein ligase binding; mitogen-activated protein kinase kinase binding; ubiquitin-protein transferase regulator activity; protein kinase activity; enzyme binding	nucleus; plasma membrane; cytosol; nucleolus; nuclear membrane
GNAL	0.00135398	0.102526	0.116	0.063	1	G protein-coupled receptor signaling pathway; signal transduction; adenylate cyclase-modulating G protein-coupled receptor signaling pathway; adenylate cyclase-inhibiting G protein-coupled receptor signaling pathway; adenylate cyclase-activating G protein-coupled receptor signaling pathway; adenylate cyclase-activating dopamine receptor signaling pathway	metal ion binding; nucleotide binding; GTPase activity; GTP binding; guanyl nucleotide binding; G-protein beta/gamma-subunit complex binding; protein binding; G protein-coupled receptor binding	heterotrimeric G-protein complex; plasma membrane; extracellular exosome
PDIA4	0.00135955	0.153144	0.308	0.228	1	cell redox homeostasis; oxidation-reduction process; chaperone-mediated protein folding; protein folding; response to endoplasmic reticulum stress; protein secretion	RNA binding; isomerase activity; protein binding; protein disulfide isomerase activity; peptide disulfide oxidoreductase activity	endoplasmic reticulum; extracellular space; melanosome; endoplasmic reticulum lumen; cell surface; cell
DCTN3	0.00138805	0.163344	0.829	0.816	1	cytoskeleton-dependent cytokinesis; cell division; cell cycle; G2/M transition of mitotic cell cycle; regulation of G2/M transition of mitotic cell cycle; ciliary basal body-plasma membrane docking; antigen processing and presentation of exogenous peptide antigen via MHC class II; endoplasmic reticulum to Golgi vesicle-mediated transport; mitotic cell cycle; microtubule-based process	protein binding; structural molecule activity	dynactin complex; cytoplasm; nucleolus; cytosol; chromosome; cytoskeleton; perinuclear region of cytoplasm; centrosome; microtubule organizing center; spindle; midbody; chromosome, centromeric region; kinetochore; condensed chromosome kinetochore; cleavage furrow; microtubule; microtubule associated complex
FNTA	0.00139212	0.167818	0.369	0.289	1	regulation of neurotransmitter receptor activity; protein farnesylation; protein prenylation; transforming growth factor beta receptor signaling pathway; regulation of rhodopsin mediated signaling pathway; protein geranylgeranylation; positive regulation of deacetylase activity; neuromuscular junction development; neurotransmitter receptor metabolic process; skeletal muscle acetylcholine-gated ch…	transferase activity; protein binding; prenyltransferase activity; protein farnesyltransferase activity; protein prenyltransferase activity; microtubule binding; CAAX-protein geranylgeranyltransferase activity; protein geranylgeranyltransferase activity; Rab geranylgeranyltransferase activity; acetylcholine receptor regulator activity; receptor tyrosine kinase binding; alpha-tubulin binding	cytoplasm; plasma membrane; protein farnesyltransferase complex; cytosol; microtubule associated complex; CAAX-protein geranylgeranyltransferase complex
EEF1E1	0.00140201	-0.185521	0.476	0.568	1	positive regulation of cellular senescence; translation; negative regulation of cell population proliferation; positive regulation of apoptotic process; positive regulation of DNA damage response, signal transduction by p53 class mediator; tRNA aminoacylation for protein translation	protein binding	nucleus; cytoplasm; nucleolus; cytosol; nucleoplasm; aminoacyl-tRNA synthetase multienzyme complex; membrane; integral component of membrane
NSUN5	0.00140786	0.15307	0.195	0.13	1	methylation; rRNA processing; rRNA base methylation	RNA binding; transferase activity; methyltransferase activity	nucleus; nucleolus
TMPO	0.00141078	-0.155684	0.479	0.612	1	regulation of transcription, DNA-templated	DNA binding; protein binding; lamin binding; cadherin binding	nucleus; cytoplasm; membrane; integral component of membrane; nuclear membrane; nuclear inner membrane; nuclear envelope; chromosome; chromatin
ORC6	0.0014199	0.156456	0.171	0.108	1	DNA replication; G1/S transition of mitotic cell cycle; DNA replication initiation; negative regulation of cell division	DNA binding; protein binding; DNA replication origin binding	nucleus; membrane; fibrillar center; nuclear origin of replication recognition complex; nucleoplasm; origin recognition complex
SLCO5A1	0.00144836	-0.138512	0.57	0.703	1	transmembrane transport; sodium-independent organic anion transport	sodium-independent organic anion transmembrane transporter activity; protein binding; transporter activity	membrane; integral component of membrane; plasma membrane; integral component of plasma membrane
TIGAR	0.00145357	-0.131973	0.235	0.333	1	dephosphorylation; cellular response to DNA damage stimulus; apoptotic process; autophagy; positive regulation of DNA repair; response to ischemia; cellular response to hypoxia; negative regulation of programmed cell death; fructose 1,6-bisphosphate metabolic process; fructose 2,6-bisphosphate metabolic process; regulation of pentose-phosphate shunt; response to xenobiotic stimulus; response to g…	hydrolase activity; catalytic activity; protein binding; fructose-2,6-bisphosphate 2-phosphatase activity; bisphosphoglycerate 2-phosphatase activity	cytosol; nucleus; cytoplasm; mitochondrion; mitochondrial outer membrane; intracellular
ZNF793	0.0014536	-0.135273	0.177	0.263	1	regulation of transcription, DNA-templated	nucleic acid binding; metal ion binding; DNA binding	nucleus; intracellular
GLCCI1	0.00145843	-0.132145	0.198	0.291	1			cytoplasm
BOLA3	0.00145959	-0.127374	0.195	0.288	1			mitochondrion
USP3	0.0014598	-0.163402	0.454	0.552	1	protein deubiquitination; ubiquitin-dependent protein catabolic process; chromatin organization; proteolysis; DNA repair; cellular response to DNA damage stimulus; cell cycle; histone deubiquitination; regulation of protein stability; mitotic cell cycle; negative regulation of transcription by RNA polymerase II	zinc ion binding; thiol-dependent ubiquitinyl hydrolase activity; metal ion binding; hydrolase activity; peptidase activity; cysteine-type peptidase activity; thiol-dependent ubiquitin-specific protease activity; histone binding; RNA polymerase II proximal promoter sequence-specific DNA binding; promoter-specific chromatin binding	nucleus; nucleoplasm; nuclear chromatin; cytoplasmic ribonucleoprotein granule; Flemming body
ANKRD28	0.00147902	-0.105761	0.107	0.184	1	COPII vesicle coating	protein binding	nucleus; nucleoplasm; Golgi membrane; cytosol
ZEB1	0.001485	0.250836	0.579	0.529	1	negative regulation of endothelial cell differentiation; cell differentiation; nervous system development; negative regulation of transcription by RNA polymerase II; negative regulation of transcription, DNA-templated; cytokine-mediated signaling pathway; regulation of transcription by RNA polymerase II; positive regulation of neuron differentiation; pattern specification process; central nervous…	nucleic acid binding; metal ion binding; DNA binding; protein binding; DNA-binding transcription factor activity, RNA polymerase II-specific; transcription coactivator activity; transcription corepressor activity; DNA-binding transcription factor activity; E-box binding; DNA-binding transcription repressor activity, RNA polymerase II-specific; zinc ion binding; chromatin binding	nucleus; cytosol; nucleoplasm; nuclear chromatin
LMO1	0.00149283	0.194465	0.238	0.165	1	positive regulation of transcription by RNA polymerase II; regulation of hematopoietic stem cell differentiation; negative regulation of transcription by RNA polymerase II; regulation of T cell homeostatic proliferation	metal ion binding; protein binding	nucleus; nucleoplasm
KIAA1958	0.00149699	0.132617	0.244	0.17	1		protein binding
SNTB2	0.00150685	0.135262	0.177	0.111	1		RNA binding; actin binding; structural molecule activity; protein binding; calmodulin binding	cytoplasm; membrane; cytoskeleton; cell junction; cytoplasmic vesicle; microtubule; synapse; focal adhesion; protein-containing complex; transport vesicle membrane; dystrophin-associated glycoprotein complex
INSIG1	0.00151868	0.151148	0.244	0.171	1	lipid metabolic process; steroid metabolic process; cholesterol metabolic process; triglyceride metabolic process; cholesterol biosynthetic process; response to sterol depletion; negative regulation of steroid biosynthetic process; sterol biosynthetic process; inner ear morphogenesis; middle ear morphogenesis; negative regulation of fat cell differentiation; negative regulation of fatty acid bios…	protein binding	membrane; integral component of membrane; endoplasmic reticulum; endoplasmic reticulum membrane; SREBP-SCAP-Insig complex
BUD23	0.00154055	-0.198822	0.433	0.533	1	methylation; chromatin organization; ribosome biogenesis; rRNA processing; rRNA (guanine-N7)-methylation; rRNA methylation; positive regulation of rRNA processing	RNA binding; transferase activity; methyltransferase activity; rRNA (guanine) methyltransferase activity; protein heterodimerization activity	nucleus; cytoplasm; nucleolus; perinuclear region of cytoplasm; nucleoplasm
UCP2	0.00155247	-0.1187	0.137	0.218	1	response to superoxide; response to hypoxia; mitochondrial transport; female pregnancy; aging; response to glucose; positive regulation of cell death; cellular response to insulin stimulus; cellular response to hormone stimulus; cellular response to amino acid starvation; negative regulation of apoptotic process; regulation of mitochondrial membrane potential; negative regulation of insulin secre…	protein binding; oxidative phosphorylation uncoupler activity	membrane; integral component of membrane; mitochondrion; cytoplasm; mitochondrial membrane; mitochondrial inner membrane
CCDC71L	0.00155283	-0.119424	0.125	0.206	1	positive regulation of fat cell differentiation; cellular lipid metabolic process
SERINC1	0.00157463	0.250932	0.716	0.679	1	lipid metabolic process; sphingolipid metabolic process; phospholipid biosynthetic process; phosphatidylserine metabolic process; positive regulation of CDP-diacylglycerol-serine O-phosphatidyltransferase activity; positive regulation of serine C-palmitoyltransferase activity; membrane biogenesis	protein binding; protein binding, bridging; enzyme binding	membrane; integral component of membrane; endoplasmic reticulum; endoplasmic reticulum membrane; plasma membrane
GLTP	0.00158336	0.132662	0.274	0.202	1	lipid transport; intermembrane lipid transfer; glycosphingolipid metabolic process; ceramide transport; ceramide 1-phosphate transport; glycolipid transport	protein binding; lipid transfer activity; identical protein binding; lipid binding; ceramide 1-phosphate binding; ceramide 1-phosphate transfer activity; glycolipid transfer activity; glycolipid binding	cytoplasm; cytosol
CHML	0.0015971	-0.144389	0.299	0.39	1	intracellular protein transport; small GTPase mediated signal transduction; regulation of catalytic activity; positive regulation of GTPase activity; vesicle-mediated transport; protein geranylgeranylation; post-translational protein modification; G protein-coupled receptor signaling pathway	GTPase activator activity; Rab GTPase binding; GDP-dissociation inhibitor activity; G protein-coupled receptor activity	cytoplasm; nucleus; cytosol; nucleoplasm; Rab-protein geranylgeranyltransferase complex; membrane; integral component of membrane
TBCC	0.00160017	-0.1461	0.366	0.481	1	cell morphogenesis; post-chaperonin tubulin folding pathway; protein folding; tubulin complex assembly	tubulin binding; GTPase activity; chaperone binding	cytoplasm; cytosol; cytoskeleton; photoreceptor connecting cilium; microtubule
GNG3	0.0016396	0.288241	0.57	0.486	1	G protein-coupled receptor signaling pathway; signal transduction; activation of MAPK activity; positive regulation of cytosolic calcium ion concentration	GTPase activity; G-protein beta-subunit binding; protein binding	membrane; plasma membrane; heterotrimeric G-protein complex; G-protein beta/gamma-subunit complex; postsynaptic density; dendrite; cell body
NRP2	0.0016484	0.185975	0.396	0.318	1	positive regulation of endothelial cell migration; cell adhesion; axon guidance; multicellular organism development; cell differentiation; angiogenesis; nervous system development; viral process; vascular endothelial growth factor signaling pathway; positive regulation of endothelial cell proliferation; vascular endothelial growth factor receptor signaling pathway; outflow tract septum morphogene…	metal ion binding; protein binding; semaphorin receptor activity; vascular endothelial growth factor-activated receptor activity; heparin binding; signaling receptor activity; growth factor binding; cytokine binding	membrane; integral component of membrane; extracellular region; plasma membrane; semaphorin receptor complex; axon; glutamatergic synapse; integral component of postsynaptic membrane
CD24	0.00165775	0.17517	0.698	0.608	1	cell adhesion; Wnt signaling pathway; positive regulation of protein tyrosine kinase activity; cell migration; response to hypoxia; response to molecule of bacterial origin; positive regulation of cytosolic calcium ion concentration; intrinsic apoptotic signaling pathway; response to estrogen; cholesterol homeostasis; cell-cell adhesion; regulation of epithelial cell differentiation; glomerular v…	protein binding; protein kinase binding; protein tyrosine kinase activator activity	membrane; plasma membrane; membrane raft; cell surface; anchored component of membrane; anchored component of external side of plasma membrane; intracellular membrane-bounded organelle
ATXN7L3B	0.00166049	-0.17804	0.707	0.778	1	regulation of gene expression	protein binding	cytoplasm
CYB5A	0.00166225	0.307862	0.515	0.458	1	oxidation-reduction process; proton transmembrane transport; electron transport chain; response to cadmium ion; L-ascorbic acid metabolic process	metal ion binding; heme binding; cytochrome-c oxidase activity; enzyme binding	cytoplasm; membrane; integral component of membrane; intracellular membrane-bounded organelle; cytosol; endoplasmic reticulum; endoplasmic reticulum membrane; organelle membrane; mitochondrial outer membrane
SNHG30	0.00166243	-0.13048	0.165	0.248	1
FNDC5	0.00167149	0.172123	0.223	0.155	1	response to muscle activity; positive regulation of brown fat cell differentiation; signal transduction	protein binding; hormone activity	membrane; integral component of membrane; extracellular region; endoplasmic reticulum; plasma membrane; peroxisome; peroxisomal membrane
BICD1	0.00169343	-0.170071	0.558	0.649	1	viral process; regulation of microtubule cytoskeleton organization; positive regulation of receptor-mediated endocytosis; anatomical structure morphogenesis; RNA processing; minus-end-directed organelle transport along microtubule; positive regulation of protein localization to centrosome; protein localization to organelle; stress granule assembly; microtubule anchoring at microtubule organizing …	protein binding; cytoskeletal adaptor activity; dynein complex binding; structural constituent of cytoskeleton; Rab GTPase binding; dynein intermediate chain binding; protein kinase binding; dynactin binding; proteinase activated receptor binding	perinuclear region of cytoplasm; Golgi apparatus; cytoskeleton; cytosol; cytoplasmic vesicle; membrane; cytoplasmic microtubule; trans-Golgi network; centrosome; tubulin complex; host cell viral assembly compartment
PLPPR3	0.00169722	-0.123034	0.366	0.486	1	phospholipid metabolic process; phospholipid dephosphorylation	hydrolase activity; phosphatidate phosphatase activity; phosphatase activity; lipid phosphatase activity	membrane; integral component of membrane; integral component of plasma membrane
FOXP4	0.00170376	-0.126694	0.189	0.277	1	regulation of transcription, DNA-templated; regulation of transcription by RNA polymerase II	metal ion binding; DNA binding; DNA-binding transcription factor activity; sequence-specific DNA binding; protein binding; DNA-binding transcription factor activity, RNA polymerase II-specific	nucleus; nuclear chromatin
SLC25A3	0.00170433	0.125602	0.933	0.952	1	proton transmembrane transport; phosphate ion transmembrane transport	symporter activity; protein-containing complex binding; inorganic phosphate transmembrane transporter activity; phosphate:proton symporter activity	membrane; integral component of membrane; mitochondrion; mitochondrial inner membrane; extracellular exosome; integral component of plasma membrane; integral component of mitochondrial inner membrane
KAT6B	0.00170464	-0.134736	0.701	0.811	1	regulation of transcription, DNA-templated; chromatin organization; nucleosome assembly; histone acetylation; positive regulation of transcription, DNA-templated; positive regulation of transcription by RNA polymerase II; negative regulation of transcription, DNA-templated; histone H3 acetylation; cellular response to leukemia inhibitory factor	metal ion binding; transferase activity; DNA binding; transferase activity, transferring acyl groups; histone acetyltransferase activity; histone binding; protein binding; transcription factor binding; acetyltransferase activity	nucleus; nucleosome; nuclear chromatin; nucleoplasm; histone acetyltransferase complex; MOZ/MORF histone acetyltransferase complex; chromosome
ARSG	0.00174354	0.119255	0.113	0.063	1	sulfur compound metabolic process	metal ion binding; hydrolase activity; catalytic activity; arylsulfatase activity; sulfuric ester hydrolase activity	extracellular space; lysosome; endoplasmic reticulum lumen; endoplasmic reticulum
CAMK1D	0.00177153	-0.144909	0.287	0.381	1	protein phosphorylation; phosphorylation; metabolic process; inflammatory response; nervous system development; positive regulation of phagocytosis; positive regulation of neuron projection development; positive regulation of CREB transcription factor activity; positive regulation of respiratory burst; positive regulation of neutrophil chemotaxis; regulation of dendrite development; positive regu…	nucleotide binding; protein kinase activity; protein serine/threonine kinase activity; ATP binding; kinase activity; transferase activity; catalytic activity; calmodulin binding; calmodulin-dependent protein kinase activity	nucleus; cytoplasm
SEPTIN11	0.00180513	-0.148577	0.793	0.849	1	cell division; cell cycle; protein heterooligomerization; cilium assembly; cytoskeleton-dependent cytokinesis; regulation of synapse organization	nucleotide binding; GTP binding; protein binding; GTPase activity	cytoplasm; cytoskeleton; cell projection; cell junction; synapse; axon; stress fiber; microtubule cytoskeleton; dendritic spine; septin ring; septin complex; postsynapse; glutamatergic synapse; GABA-ergic synapse; postsynaptic specialization of symmetric synapse
ZNF462	0.00181661	-0.170415	0.671	0.757	1	positive regulation of transcription by RNA polymerase II; regulation of gene expression; chromatin organization; negative regulation of DNA binding	nucleic acid binding; metal ion binding; DNA binding; protein binding; RNA polymerase II core promoter sequence-specific DNA binding	nucleus; histone methyltransferase complex
RBM24	0.00182453	0.195075	0.183	0.122	1	mRNA processing; RNA splicing; cellular response to DNA damage stimulus; cell differentiation; 3'-UTR-mediated mRNA destabilization; regulation of translation; regulation of alternative mRNA splicing, via spliceosome; endocardial cushion development; regulation of myotube differentiation; regulation of mRNA stability; positive regulation of skeletal muscle fiber differentiation; positive regulati…	nucleic acid binding; RNA binding; protein binding; mRNA binding; mRNA 3'-UTR binding; pre-mRNA intronic binding; mRNA 3'-UTR AU-rich region binding; sequence-specific mRNA binding; mRNA CDS binding	nucleus; cytoplasm; cytosol; nucleoplasm; ribonucleoprotein complex
SCAI	0.00184223	0.133561	0.244	0.174	1	transcription, DNA-templated; negative regulation of nucleic acid-templated transcription; negative regulation of signal transduction; negative regulation of cell migration; negative regulation of Rho protein signal transduction	transcription corepressor activity; protein binding	nucleus; cytoplasm; membrane; integral component of membrane; nuclear membrane; nucleoplasm
ZNF518B	0.00184289	-0.102063	0.119	0.197	1		nucleic acid binding; metal ion binding; DNA binding	nucleus
SEC23A	0.00184439	0.145886	0.271	0.199	1	intracellular protein transport; protein transport; endoplasmic reticulum to Golgi vesicle-mediated transport; positive regulation of GTPase activity; vesicle-mediated transport; COPII-coated vesicle budding; antigen processing and presentation of exogenous peptide antigen via MHC class II; COPII vesicle coating; antigen processing and presentation of peptide antigen via MHC class I; COPII-coated…	zinc ion binding; metal ion binding; protein binding; GTPase activator activity	cytoplasm; membrane; endoplasmic reticulum; endoplasmic reticulum membrane; COPII vesicle coat; cytosol; cytoplasmic vesicle; ER to Golgi transport vesicle membrane; endoplasmic reticulum exit site; extrinsic component of membrane; Golgi membrane; COPII-coated ER to Golgi transport vesicle; perinuclear region of cytoplasm
NDUFA2	0.00185215	0.149103	0.732	0.692	1	oxidation-reduction process; mitochondrial respiratory chain complex I assembly; mitochondrial electron transport, NADH to ubiquinone; blastocyst hatching	NADH dehydrogenase (ubiquinone) activity	membrane; mitochondrial inner membrane; mitochondrion; respirasome; mitochondrial membrane; mitochondrial respiratory chain complex I
TRMT6	0.00186001	-0.108186	0.21	0.305	1	tRNA processing; tRNA methylation; tRNA modification; mRNA methylation	RNA binding; protein binding; tRNA (adenine-N1-)-methyltransferase activity	nucleus; tRNA (m1A) methyltransferase complex; nucleoplasm
SEPHS2	0.00186952	-0.123082	0.226	0.33	1	phosphorylation; selenocysteine metabolic process; selenium compound metabolic process; selenocysteine biosynthetic process; tRNA seleno-modification	nucleotide binding; ATP binding; kinase activity; transferase activity; selenide, water dikinase activity	cytoplasm; cytosol
CANX	0.00187278	0.203259	0.762	0.71	1	protein folding; antigen processing and presentation of exogenous peptide antigen via MHC class II; clathrin-dependent endocytosis; endoplasmic reticulum unfolded protein response; antigen processing and presentation of peptide antigen via MHC class I; synaptic vesicle endocytosis; interleukin-27-mediated signaling pathway; interleukin-35-mediated signaling pathway; protein secretion; protein fol…	calcium ion binding; unfolded protein binding; RNA binding; metal ion binding; carbohydrate binding; protein binding; apolipoprotein binding; ionotropic glutamate receptor binding	endoplasmic reticulum; membrane; integral component of membrane; endoplasmic reticulum membrane; melanosome; extracellular exosome; endoplasmic reticulum lumen; integral component of lumenal side of endoplasmic reticulum membrane; mitochondria-associated endoplasmic reticulum membrane; cytoplasm; smooth endoplasmic reticulum; rough endoplasmic reticulum; ribosome; axon; dendrite cytoplasm; protei…
CCDC91	0.00189466	-0.123737	0.235	0.33	1	Golgi vesicle transport; protein transport; Golgi to lysosome transport	identical protein binding	Golgi apparatus; nucleoplasm; membrane; cytosol; trans-Golgi network
ACVR2B	0.00190719	0.176307	0.534	0.456	1	BMP signaling pathway; positive regulation of osteoblast differentiation; protein phosphorylation; phosphorylation; transmembrane receptor protein serine/threonine kinase signaling pathway; negative regulation of cold-induced thermogenesis; positive regulation of bone mineralization; cellular response to growth factor stimulus; negative regulation of transcription by RNA polymerase II; activin re…	metal ion binding; nucleotide binding; protein kinase activity; protein serine/threonine kinase activity; ATP binding; kinase activity; transferase activity; protein binding; transmembrane receptor protein serine/threonine kinase activity; activin binding; activin-activated receptor activity; growth factor binding; activin receptor activity, type II; protein serine/threonine/tyrosine kinase activ…	membrane; integral component of membrane; plasma membrane; receptor complex; protein-containing complex; integral component of plasma membrane; cytoplasm; activin receptor complex
CASD1	0.00191196	0.143504	0.293	0.219	1	carbohydrate metabolic process	transferase activity; transferase activity, transferring acyl groups; acetyltransferase activity; N-acetylneuraminate 7-O(or 9-O)-acetyltransferase activity	membrane; integral component of membrane; Golgi apparatus; Golgi membrane; integral component of Golgi membrane
TAOK1	0.00194067	0.176831	0.652	0.59	1	protein phosphorylation; phosphorylation; DNA repair; cellular response to DNA damage stimulus; apoptotic process; microtubule cytoskeleton organization; mitotic G2 DNA damage checkpoint; signal transduction by protein phosphorylation; activation of protein kinase activity; positive regulation of stress-activated MAPK cascade; positive regulation of JNK cascade; regulation of cytoskeleton organiz…	protein kinase activity; ATP binding; nucleotide binding; protein serine/threonine kinase activity; kinase activity; transferase activity; protein binding; tau protein binding; MAP kinase kinase kinase activity; tau-protein kinase activity; beta-tubulin binding; alpha-tubulin binding; protein serine/threonine kinase activator activity	cytoplasm; nucleus; cytosol; extracellular exosome; perinuclear region of cytoplasm; microtubule cytoskeleton
ING1	0.00194112	-0.123907	0.22	0.32	1	cell cycle; negative regulation of cell population proliferation; regulation of cell death; positive regulation of transcription, DNA-templated; negative regulation of cell growth; chromatin organization	metal ion binding; protein binding; methylated histone binding	nucleus
APOO	0.00196331	-0.110074	0.177	0.264	1	cristae formation; lipid transport	protein binding	mitochondrial inner membrane; mitochondrion; MICOS complex; extracellular space; membrane; integral component of membrane; cytosol; endoplasmic reticulum; endoplasmic reticulum membrane; Golgi apparatus; extracellular region; integral component of mitochondrial inner membrane; Golgi membrane; very-low-density lipoprotein particle; high-density lipoprotein particle; low-density lipoprotein particle
CCDC144NL-AS1	0.0019643	0.18242	0.375	0.297	1
USP8	0.00196652	0.148095	0.588	0.52	1	protein deubiquitination; proteolysis; cell cycle; ubiquitin-dependent protein catabolic process; protein K63-linked deubiquitination; protein K48-linked deubiquitination; endosome organization; regulation of protein stability; Ras protein signal transduction; regulation of protein localization; positive regulation of canonical Wnt signaling pathway; mitotic cytokinesis; cellular response to dexa…	hydrolase activity; protein binding; peptidase activity; cysteine-type peptidase activity; thiol-dependent ubiquitinyl hydrolase activity; thiol-dependent ubiquitin-specific protease activity; cadherin binding; SH3 domain binding; cysteine-type endopeptidase activity	nucleus; cytoplasm; membrane; cytosol; plasma membrane; endosome; early endosome; endosome membrane; postsynaptic density; midbody; dendritic spine; extrinsic component of plasma membrane; extrinsic component of endosome membrane; glutamatergic synapse
SLC7A5	0.00197892	-0.166279	0.207	0.298	1	transmembrane transport; amino acid transport; leukocyte migration; neutral amino acid transport; L-alpha-amino acid transmembrane transport; branched-chain amino acid transport; L-amino acid transport; L-tryptophan transmembrane transport	transmembrane transporter activity; protein binding; peptide antigen binding; L-amino acid transmembrane transporter activity; amino acid transmembrane transporter activity; L-leucine transmembrane transporter activity; L-tryptophan transmembrane transporter activity	membrane; integral component of membrane; intracellular membrane-bounded organelle; cytosol; plasma membrane; lysosomal membrane; lysosome; extracellular exosome; apical plasma membrane; cell surface; basolateral plasma membrane; external side of apical plasma membrane; amino acid transport complex; basal plasma membrane
CHPT1	0.0019822	0.116911	0.259	0.184	1	lipid metabolic process; phospholipid biosynthetic process; phosphatidylcholine biosynthetic process; regulation of cell growth; platelet activating factor biosynthetic process; CDP-choline pathway	metal ion binding; transferase activity; phosphotransferase activity, for other substituted phosphate groups; diacylglycerol binding; diacylglycerol cholinephosphotransferase activity	membrane; integral component of membrane; intracellular membrane-bounded organelle; Golgi apparatus; Golgi membrane; endoplasmic reticulum membrane
NDUFAF2	0.00198848	-0.147943	0.393	0.494	1	respiratory electron transport chain; cellular respiration; negative regulation of insulin secretion involved in cellular response to glucose stimulus; reactive oxygen species metabolic process; mitochondrial respiratory chain complex I assembly	NADH dehydrogenase (ubiquinone) activity; electron transfer activity	membrane; mitochondrion; mitochondrial inner membrane
SPOCK2	0.0020175	0.126361	0.122	0.071	1	regulation of cell differentiation; synapse assembly; extracellular matrix organization; negative regulation of endopeptidase activity; positive regulation of cell motility; positive regulation of cell-substrate adhesion; peptide cross-linking via chondroitin 4-sulfate glycosaminoglycan; cellular response to leukemia inhibitory factor	calcium ion binding; collagen binding; extracellular matrix binding; metalloendopeptidase inhibitor activity; protein binding; glycosaminoglycan binding	extracellular region; extracellular space; extracellular matrix
DDX3X	0.00205575	-0.162422	0.591	0.697	1	translational initiation; negative regulation of apoptotic process; DNA duplex unwinding; apoptotic process; Wnt signaling pathway; positive regulation of translation; immune system process; innate immune response; ribosome biogenesis; chromosome segregation; positive regulation of translational initiation; cell differentiation; positive regulation of transcription by RNA polymerase II; positive …	nucleic acid binding; RNA binding; nucleotide binding; ATP binding; hydrolase activity; DNA binding; protein binding; DNA helicase activity; helicase activity; RNA helicase activity; cadherin binding; protein serine/threonine kinase activator activity; ATPase activity; transcription factor binding; GTPase activity; poly(A) binding; eukaryotic initiation factor 4E binding; nucleoside-triphosphatas…	nucleus; cytoplasm; nuclear speck; membrane; eukaryotic translation initiation factor 3 complex; cytosol; mitochondrion; cytosolic small ribosomal subunit; mitochondrial outer membrane; extracellular region; extracellular exosome; cytoplasmic stress granule; secretory granule lumen; ficolin-1-rich granule lumen; P granule; integral component of membrane
ZNF286A	0.00209816	-0.155278	0.524	0.613	1	regulation of transcription, DNA-templated	nucleic acid binding; metal ion binding; DNA binding	nucleus; intracellular; membrane; integral component of membrane
FAM155A	0.00211414	0.103526	0.113	0.064	1	calcium ion import across plasma membrane	stretch-activated, cation-selective, calcium channel activity	membrane; integral component of membrane; plasma membrane
ACOT13	0.00211787	-0.156648	0.363	0.468	1	acyl-CoA metabolic process; negative regulation of cold-induced thermogenesis; protein homotetramerization	hydrolase activity; acyl-CoA hydrolase activity	nucleus; cytoplasm; mitochondrion; cytosol; cytoskeleton; spindle
SORBS1	0.00212713	-0.115304	0.104	0.174	1	positive regulation of glucose import; positive regulation of protein localization to plasma membrane; cellular response to insulin stimulus; focal adhesion assembly; insulin receptor signaling pathway; muscle contraction; positive regulation of insulin receptor signaling pathway; cell-matrix adhesion; positive regulation of glycogen biosynthetic process; positive regulation of lipid biosynthetic…	protein binding; actin binding; insulin receptor binding; SH3/SH2 adaptor activity; cytoskeletal protein binding	centrosome; plasma membrane; focal adhesion; nucleus; cytoplasm; membrane; cytoskeleton; cell junction; membrane raft; cytosol; stress fiber; adherens junction; nuclear matrix; cell-cell adherens junction; insulin receptor complex; zonula adherens; cell-substrate adherens junction
VDAC3	0.00213009	-0.131159	0.564	0.667	1	transmembrane transport; inorganic anion transport; anion transmembrane transport; regulation of cilium assembly; ion transport; behavioral fear response; chemical synaptic transmission; neuron-neuron synaptic transmission; learning; adenine transport	voltage-gated anion channel activity; nucleotide binding; protein binding; porin activity	mitochondrial outer membrane; mitochondrion; nucleus; membrane; integral component of membrane; extracellular exosome; pore complex
MASP1	0.00214742	-0.158638	0.113	0.184	1	proteolysis; immune system process; innate immune response; receptor-mediated endocytosis; complement activation; complement activation, lectin pathway	metal ion binding; hydrolase activity; calcium ion binding; protein homodimerization activity; peptidase activity; serine-type endopeptidase activity; serine-type peptidase activity; protein binding; calcium-dependent protein binding	cytosol; nucleoplasm; extracellular space; extracellular region
TRIP12	0.00215684	-0.13072	0.36	0.466	1	protein ubiquitination; DNA repair; cellular response to DNA damage stimulus; ubiquitin-dependent protein catabolic process; protein polyubiquitination; negative regulation of histone H2A K63-linked ubiquitination; negative regulation of double-strand break repair; regulation of embryonic development	transferase activity; ubiquitin-protein transferase activity; protein binding; thyroid hormone receptor binding; zinc ion binding	nucleus; nuclear speck; nucleoplasm; cytosol
PBX3	0.00216136	0.21246	0.268	0.201	1	regulation of transcription, DNA-templated; anterior compartment pattern formation; posterior compartment specification; regulation of respiratory gaseous exchange by nervous system process; respiratory gaseous exchange by respiratory system; adult locomotory behavior; dorsal spinal cord development; positive regulation of transcription by RNA polymerase II; neuron development	DNA binding; DNA-binding transcription factor activity; sequence-specific DNA binding; DNA-binding transcription factor activity, RNA polymerase II-specific; RNA polymerase II distal enhancer sequence-specific DNA binding; DNA-binding transcription activator activity, RNA polymerase II-specific; protein binding	nucleus; nuclear chromatin; transcription factor complex
WDR60	0.00218022	-0.117422	0.198	0.294	1	intraciliary transport involved in cilium assembly; cell projection organization; cilium assembly; microtubule-based movement; positive regulation of ATP-dependent microtubule motor activity, plus-end-directed; embryonic skeletal system morphogenesis	protein binding; ATP-dependent microtubule motor activity, plus-end-directed; dynein light chain binding; dynein heavy chain binding	extracellular space; cell projection; cilium; ciliary base; ciliary tip; spindle pole; centrosome; cytoplasmic dynein complex; interphase microtubule organizing center; pericentriolar material
APP	0.00219219	0.184259	0.774	0.74	1	negative regulation of gene expression; cellular response to amyloid-beta; response to interleukin-1; microglial cell activation; positive regulation of NIK/NF-kappaB signaling; positive regulation of protein phosphorylation; positive regulation of gene expression; positive regulation of amyloid-beta formation; negative regulation of long-term synaptic potentiation; nervous system development; ce…	metal ion binding; DNA binding; serine-type endopeptidase inhibitor activity; protein binding; heparin binding; identical protein binding; transition metal ion binding; peptidase activator activity; signaling receptor activator activity; growth factor receptor binding; peptidase inhibitor activity; signaling receptor binding; enzyme binding; PTB domain binding	plasma membrane; nucleus; cytoplasm; membrane; integral component of membrane; Golgi apparatus; extracellular space; cell projection; extracellular region; perinuclear region of cytoplasm; cytoplasmic vesicle; smooth endoplasmic reticulum; clathrin-coated pit; cell surface; endosome; early endosome; rough endoplasmic reticulum; Golgi-associated vesicle; cell-cell junction; synaptic vesicle; COPII…
PHF3	0.00220129	0.214472	0.549	0.486	1	transcription, DNA-templated; multicellular organism development	metal ion binding
INO80	0.00220606	-0.135754	0.155	0.238	1	cell division; transcription, DNA-templated; DNA repair; DNA recombination; cellular response to DNA damage stimulus; cell cycle; chromatin remodeling; double-strand break repair; ATP-dependent chromatin remodeling; positive regulation of transcription by RNA polymerase II; protein deubiquitination; positive regulation of nuclear cell cycle DNA replication; double-strand break repair via homologo…	nucleotide binding; ATP binding; hydrolase activity; DNA binding; actin binding; protein binding; ATPase activity; histone binding; alpha-tubulin binding; DNA-dependent ATPase activity	nucleus; cytoplasm; nucleoplasm; plasma membrane; chromosome; intermediate filament cytoskeleton; cytoskeleton; Ino80 complex; nuclear body; microtubule; spindle
PTBP3	0.00221965	-0.196483	0.332	0.431	1	mRNA processing; RNA splicing; regulation of cell differentiation; cell differentiation; erythrocyte maturation; anatomical structure morphogenesis; negative regulation of RNA splicing	nucleic acid binding; RNA binding	nucleus
SERPINH1	0.00222485	0.105971	0.14	0.086	1	negative regulation of endopeptidase activity; collagen fibril organization; response to unfolded protein; chondrocyte development involved in endochondral bone morphogenesis; collagen biosynthetic process; protein maturation	RNA binding; serine-type endopeptidase inhibitor activity; collagen binding; unfolded protein binding	extracellular space; endoplasmic reticulum; collagen trimer; membrane raft; endoplasmic reticulum lumen; collagen-containing extracellular matrix; endoplasmic reticulum-Golgi intermediate compartment; cytoplasm
SMURF2	0.00224001	-0.152825	0.232	0.316	1	protein ubiquitination; ubiquitin-dependent protein catabolic process; positive regulation of protein catabolic process; protein polyubiquitination; protein deubiquitination; proteasome-mediated ubiquitin-dependent protein catabolic process; Wnt signaling pathway, planar cell polarity pathway; positive regulation of canonical Wnt signaling pathway; negative regulation of BMP signaling pathway; BM…	transferase activity; ubiquitin-protein transferase activity; protein binding; ubiquitin protein ligase activity; identical protein binding; SMAD binding; transforming growth factor beta receptor binding	nucleus; cytoplasm; nuclear speck; membrane; plasma membrane; membrane raft; nucleoplasm; cytosol; ubiquitin ligase complex
SAP18	0.00227697	0.142229	0.942	0.926	1	mRNA processing; RNA splicing; negative regulation of nucleic acid-templated transcription; positive regulation of apoptotic process; regulation of alternative mRNA splicing, via spliceosome; regulation of transcription by RNA polymerase II; negative regulation of mRNA splicing, via spliceosome	RNA binding; protein binding; transcription corepressor activity	nucleus; cytoplasm; nuclear speck; cytosol; nucleoplasm; nuclear body; exon-exon junction complex; histone deacetylase complex; ASAP complex
HMGA2	0.0023359	0.125521	0.195	0.132	1	positive regulation of angiogenesis; negative regulation of cellular senescence; positive regulation of cell proliferation in bone marrow; negative regulation of apoptotic process; regulation of transcription, DNA-templated; cell division; chromatin organization; cell cycle; positive regulation of transcription, DNA-templated; negative regulation of transcription by RNA polymerase II; positive re…	DNA binding; protein binding; DNA-(apurinic or apyrimidinic site) endonuclease activity; transcription factor binding; transcription regulatory region DNA binding; RNA polymerase II proximal promoter sequence-specific DNA binding; transcription coregulator activity; DNA-binding transcription repressor activity, RNA polymerase II-specific; DNA-binding transcription activator activity, RNA polymera…	nucleus; chromatin; nucleoplasm; nuclear chromosome; protein-DNA complex; senescence-associated heterochromatin focus; SMAD protein complex
MFF	0.00235468	0.142804	0.665	0.615	1	positive regulation of protein targeting to membrane; protein homooligomerization; release of cytochrome c from mitochondria; mitochondrial fission; regulation of mitochondrion organization; peroxisome fission; mitochondrial fragmentation involved in apoptotic process; mitochondrion morphogenesis; positive regulation of release of cytochrome c from mitochondria; regulation of peroxisome organizat…	protein homodimerization activity; protein binding	membrane; integral component of membrane; mitochondrion; cell junction; cytoplasmic vesicle; synapse; mitochondrial outer membrane; peroxisome; synaptic vesicle; integral component of mitochondrial membrane
PDXDC1	0.00236728	0.144029	0.256	0.186	1	carboxylic acid metabolic process; ameboidal-type cell migration; sphingolipid metabolic process; sphingolipid catabolic process	catalytic activity; pyridoxal phosphate binding; carboxy-lyase activity; lyase activity; cadherin binding; sphinganine-1-phosphate aldolase activity	Golgi apparatus; intracellular membrane-bounded organelle; endoplasmic reticulum
TAF9	0.00237307	0.153517	0.543	0.489	1	protein stabilization; negative regulation of apoptotic process; positive regulation of transcription by RNA polymerase II; DNA-templated transcription, initiation; transcription by RNA polymerase II; transcription initiation from RNA polymerase II promoter; regulation of signal transduction by p53 class mediator; snRNA transcription by RNA polymerase II; positive regulation of cell growth; negat…	transcription regulatory region DNA binding; DNA binding; protein heterodimerization activity; protein binding; histone acetyltransferase activity; transcription coactivator activity; transcription factor binding; p53 binding; ATPase binding; C2H2 zinc finger domain binding; activating transcription factor binding	nucleus; transcription factor TFIID complex; nucleoplasm; transcription factor TFTC complex; MLL1 complex; pre-snoRNP complex; PCAF complex; STAGA complex; SAGA complex
FMNL2	0.00240107	-0.151331	0.268	0.36	1	actin cytoskeleton organization; cytoskeleton organization; cellular component organization; regulation of cell morphogenesis; regulation of cell shape; cortical actin cytoskeleton organization	actin binding; Rho GTPase binding; cadherin binding; GTPase activating protein binding	cytoplasm; cytosol
RAB8B	0.00240692	-0.184074	0.463	0.572	1	protein transport; intracellular protein transport; Rab protein signal transduction; protein secretion; protein localization to plasma membrane; regulation of exocytosis; vesicle docking involved in exocytosis; antigen processing and presentation; adherens junction organization; cellular response to insulin stimulus; protein import into peroxisome membrane; Golgi vesicle fusion to target membrane…	nucleotide binding; GTPase activity; GTP binding; protein binding; signaling receptor binding; GDP binding; TPR domain binding	membrane; intracellular membrane-bounded organelle; nucleoplasm; plasma membrane; nuclear body; cytoplasmic vesicle; peroxisomal membrane; extracellular exosome; phagocytic vesicle membrane; endosome; synaptic vesicle; trans-Golgi network transport vesicle; phagocytic vesicle; recycling endosome membrane; perinuclear region of cytoplasm; cell tip; presynapse
MICOS10	0.00242257	0.247366	0.704	0.689	1		protein binding	mitochondrial inner membrane; mitochondrion; MICOS complex; membrane; integral component of membrane
DHRS7	0.00242759	0.181239	0.473	0.41	1	oxidation-reduction process	oxidoreductase activity	membrane
VPS37D	0.00243278	-0.137868	0.232	0.317	1	protein transport; endosome transport via multivesicular body sorting pathway; protein targeting to membrane; protein targeting to vacuole; endosomal transport; macroautophagy; viral life cycle; multivesicular body assembly; viral budding via host ESCRT complex; ubiquitin-dependent protein catabolic process via the multivesicular body sorting pathway; intracellular transport of virus		membrane; ESCRT I complex; endosome; late endosome membrane; intracellular membrane-bounded organelle; extracellular exosome; endosome membrane; host cell
TAX1BP1	0.00243392	0.180232	0.732	0.674	1	negative regulation of NF-kappaB transcription factor activity; apoptotic process; negative regulation of apoptotic process; regulation of tumor necrosis factor-mediated signaling pathway; negative regulation of type I interferon production	metal ion binding; protein binding; kinase binding	cytosol; extracellular exosome
TRMT11	0.00243446	-0.160461	0.323	0.417	1	tRNA processing; methylation; tRNA methylation	nucleic acid binding; RNA binding; transferase activity; methyltransferase activity; tRNA binding; tRNA (guanine-N2-)-methyltransferase activity	cytoplasm
ALDH2	0.00244604	0.14556	0.576	0.495	1	oxidation-reduction process; electron transport chain; carbohydrate metabolic process; ethanol oxidation; alcohol metabolic process; ethanol catabolic process	oxidoreductase activity; oxidoreductase activity, acting on the aldehyde or oxo group of donors, NAD or NADP as acceptor; aldehyde dehydrogenase (NAD) activity; electron transfer activity; NAD binding; aldehyde dehydrogenase [NAD(P)+] activity; glyceraldehyde-3-phosphate dehydrogenase (NAD+) (non-phosphorylating) activity	mitochondrion; mitochondrial matrix; extracellular exosome
COX17	0.00247	0.175601	0.595	0.532	1	copper ion transport; generation of precursor metabolites and energy; mitochondrial respiratory chain complex IV assembly; positive regulation of cell population proliferation; positive regulation of cytochrome-c oxidase activity; brain development; heart development	metal ion binding; protein binding; copper ion binding; copper chaperone activity; cuprous ion binding	cytoplasm; mitochondrion; mitochondrial intermembrane space
GNB2	0.0024702	0.1634	0.616	0.551	1	signal transduction; protein folding; G protein-coupled receptor signaling pathway	protein binding; GTPase activity; protein-containing complex binding; GTPase binding; calcium channel regulator activity	cytoplasm; membrane; lysosomal membrane; extracellular space; perinuclear region of cytoplasm; focal adhesion; plasma membrane; cytosol; extracellular exosome; vesicle; protein-containing complex; cell body
APLP2	0.00248044	-0.210484	0.729	0.763	1	negative regulation of endopeptidase activity; G protein-coupled receptor signaling pathway; negative regulation of peptidase activity; cellular protein metabolic process; post-translational protein modification; platelet degranulation	metal ion binding; DNA binding; serine-type endopeptidase inhibitor activity; protein binding; heparin binding; identical protein binding; transition metal ion binding; peptidase inhibitor activity	nucleus; membrane; integral component of membrane; plasma membrane; extracellular exosome; endoplasmic reticulum lumen; platelet alpha granule membrane
FLAD1	0.00249584	-0.131326	0.226	0.313	1	FAD biosynthetic process; riboflavin metabolic process	nucleotide binding; ATP binding; transferase activity; nucleotidyltransferase activity; FMN adenylyltransferase activity; catalytic activity; protein binding	cytosol; plasma membrane; cytoplasm; mitochondrion; mitochondrial matrix
MITD1	0.00250305	-0.125203	0.146	0.224	1	cell division; cell cycle; mitotic cytokinesis; negative regulation of protein binding; midbody abscission	protein homodimerization activity; protein binding; phosphatidylinositol binding; protein domain specific binding	intracellular membrane-bounded organelle; membrane; midbody; endosome; late endosome membrane; extracellular exosome; extrinsic component of membrane
PET100	0.00250911	-0.171249	0.655	0.725	1	mitochondrial respiratory chain complex IV assembly	unfolded protein binding	membrane; integral component of membrane; mitochondrion; integral component of mitochondrial inner membrane
P4HA1	0.00252372	0.352887	0.436	0.388	1	oxidation-reduction process; peptidyl-proline hydroxylation to 4-hydroxy-L-proline; collagen fibril organization	metal ion binding; oxidoreductase activity; iron ion binding; oxidoreductase activity, acting on paired donors, with incorporation or reduction of molecular oxygen; L-ascorbic acid binding; protein binding; dioxygenase activity; identical protein binding; oxidoreductase activity, acting on single donors with incorporation of molecular oxygen, incorporation of two atoms of oxygen; procollagen-prol…	membrane; intracellular membrane-bounded organelle; endoplasmic reticulum; mitochondrion; endoplasmic reticulum lumen; collagen trimer; procollagen-proline 4-dioxygenase complex
GNAI3	0.00257416	0.193216	0.72	0.676	1	G protein-coupled receptor signaling pathway; signal transduction; cell division; adenylate cyclase-inhibiting G protein-coupled receptor signaling pathway; cell cycle; adenylate cyclase-modulating G protein-coupled receptor signaling pathway; protein folding; GTP metabolic process; dopamine receptor signaling pathway; positive regulation of macroautophagy; negative regulation of adenylate cyclas…	metal ion binding; nucleotide binding; GTPase activity; GTP binding; protein binding; guanyl nucleotide binding; G-protein beta/gamma-subunit complex binding; G protein-coupled receptor binding; GDP binding; protein domain specific binding; G protein-coupled serotonin receptor binding; GTPase activating protein binding	cytoplasm; membrane; nucleus; centrosome; nucleolus; endoplasmic reticulum membrane; lysosomal membrane; plasma membrane; cytoskeleton; heterotrimeric G-protein complex; Golgi membrane; microtubule organizing center; midbody; extracellular exosome; Golgi apparatus; zymogen granule; membrane raft
NCALD	0.00259367	0.11278	0.143	0.089	1	vesicle-mediated transport; regulation of systemic arterial blood pressure; calcium-mediated signaling	metal ion binding; calcium ion binding; actin binding; protein binding; tubulin binding; clathrin binding; alpha-tubulin binding	cytosol; intracellular; clathrin coat of trans-Golgi network vesicle
TCF12	0.00259481	0.236009	0.445	0.39	1	multicellular organism development; positive regulation of gene expression; positive regulation of neuron differentiation; positive regulation of transcription, DNA-templated; positive regulation of transcription by RNA polymerase II; cell differentiation; nervous system development; regulation of hematopoietic stem cell differentiation; immune response; regulation of transcription by RNA polymer…	transcription regulatory region DNA binding; protein dimerization activity; DNA binding; protein binding; cAMP response element binding; protein heterodimerization activity; E-box binding; HMG box domain binding; DNA-binding transcription factor activity; RNA polymerase II proximal promoter sequence-specific DNA binding; DNA-binding transcription factor activity, RNA polymerase II-specific; DNA-b…	cytoplasm; nucleus; nuclear speck; intracellular membrane-bounded organelle; nucleoplasm; transcription factor complex; nuclear chromatin; RNA polymerase II transcription factor complex
MTCH1	0.00260482	0.158937	0.72	0.684	1	apoptotic process; positive regulation of apoptotic process; regulation of signal transduction; activation of cysteine-type endopeptidase activity involved in apoptotic process; neuronal ion channel clustering	protein binding	membrane; integral component of membrane; mitochondrial inner membrane; mitochondrion
PCBP4	0.00263356	0.216487	0.625	0.587	1	DNA damage response, signal transduction by p53 class mediator resulting in cell cycle arrest; regulation of mRNA stability	nucleic acid binding; RNA binding; DNA binding; mRNA 3'-UTR binding	cytoplasm; cytosol
SLC25A4	0.00264419	0.154984	0.698	0.635	1	transmembrane transport; apoptotic mitochondrial changes; viral process; regulation of insulin secretion; generation of precursor metabolites and energy; adenine transport; ATP transport; mitochondrial genome maintenance; ADP transport; negative regulation of necroptotic process	transmembrane transporter activity; protein binding; ATP:ADP antiporter activity; adenine transmembrane transporter activity	membrane; integral component of membrane; mitochondrion; mitochondrial inner membrane; integral component of plasma membrane; integral component of mitochondrial membrane
TOMM7	0.0026492	-0.125151	0.954	0.978	1	protein transport; protein import into mitochondrial matrix; positive regulation of protein targeting to mitochondrion; macroautophagy; regulation of protein stability; positive regulation of mitophagy in response to mitochondrial depolarization; protein targeting to mitochondrion	protein binding; protein transmembrane transporter activity	membrane; integral component of membrane; mitochondrion; mitochondrial outer membrane; mitochondrial outer membrane translocase complex
ALG9	0.00268923	-0.113678	0.119	0.192	1	mannosylation; protein glycosylation; dolichol-linked oligosaccharide biosynthetic process	transferase activity, transferring glycosyl groups; mannosyltransferase activity; transferase activity; alpha-1,2-mannosyltransferase activity; dol-P-Man:Man(8)GlcNAc(2)-PP-Dol alpha-1,2-mannosyltransferase activity; dol-P-Man:Man(6)GlcNAc(2)-PP-Dol alpha-1,2-mannosyltransferase activity	endoplasmic reticulum; endoplasmic reticulum membrane; membrane; integral component of membrane
LRRN1	0.00269678	0.170784	0.268	0.203	1	positive regulation of synapse assembly	protein binding	membrane; integral component of membrane; extracellular space; extracellular matrix
CELF2	0.00270119	-0.164974	0.814	0.878	1	mRNA processing; regulation of alternative mRNA splicing, via spliceosome; RNA processing; mRNA splice site selection; regulation of heart contraction	nucleic acid binding; RNA binding; mRNA binding; pre-mRNA binding	nucleus; cytoplasm; ribonucleoprotein complex
TRDMT1	0.00271352	0.100398	0.128	0.076	1	methylation; tRNA processing; tRNA modification; response to amphetamine; tRNA methylation	transferase activity; methyltransferase activity; RNA binding; tRNA methyltransferase activity; tRNA (cytosine-5-)-methyltransferase activity	nucleus; nucleoplasm; cytoplasm
SVBP	0.00271561	-0.152284	0.561	0.665	1	proteolysis; protein secretion; negative regulation of endothelial cell migration; negative regulation of protein ubiquitination	protein binding	cytoplasm; extracellular region; apical part of cell
UBE2E2	0.0027224	0.14731	0.183	0.125	1	protein ubiquitination; protein K11-linked ubiquitination; protein K48-linked ubiquitination; protein K63-linked ubiquitination; ISG15-protein conjugation; cellular response to DNA damage stimulus; positive regulation of G1/S transition of mitotic cell cycle	nucleotide binding; ATP binding; transferase activity; protein binding; ubiquitin-protein transferase activity; ubiquitin conjugating enzyme activity; ISG15 transferase activity
RORA	0.00272731	0.12838	0.159	0.101	1	regulation of transcription, DNA-templated; steroid hormone mediated signaling pathway; rhythmic process; multicellular organism development; circadian regulation of gene expression; positive regulation of transcription, DNA-templated; xenobiotic metabolic process; negative regulation of inflammatory response; angiogenesis; transcription initiation from RNA polymerase II promoter; positive regula…	zinc ion binding; metal ion binding; DNA binding; DNA-binding transcription factor activity; sequence-specific DNA binding; protein binding; steroid hormone receptor activity; nuclear receptor activity; DNA-binding transcription factor activity, RNA polymerase II-specific; DNA-binding transcription activator activity, RNA polymerase II-specific; transcription factor binding; RNA polymerase II pro…	nucleus; nuclear chromatin; nucleoplasm
MEX3B	0.00273571	-0.168694	0.384	0.472	1	protein phosphorylation; protein autophosphorylation	nucleic acid binding; RNA binding; metal ion binding; calcium ion binding	nucleus; cytoplasm; cytosol; nucleoplasm; P-body
PURA	0.00273914	-0.11647	0.168	0.253	1	cell differentiation; negative regulation of transcription, DNA-templated; regulation of cell population proliferation; negative regulation of transcription by RNA polymerase II; regulation of transcription by RNA polymerase II; DNA replication initiation; DNA unwinding involved in DNA replication; negative regulation of translation; nervous system development; positive regulation of cell populat…	RNA binding; RNA polymerase II regulatory region sequence-specific DNA binding; purine-rich negative regulatory element binding; DNA-binding transcription factor activity; DNA binding; protein binding; sequence-specific DNA binding; DNA-binding transcription repressor activity, RNA polymerase II-specific; double-stranded DNA binding; transcription factor binding; DNA-binding transcription factor …	nucleus; dendrite cytoplasm; DNA replication factor A complex; nuclear chromosome, telomeric region; cytoplasm; dendrite; neuronal cell body; postsynapse; glutamatergic synapse
FAM228B	0.00277188	-0.112497	0.155	0.23	1
IER5L	0.0027895	0.200009	0.381	0.309	1
ZNF131	0.00280293	-0.174896	0.381	0.47	1	regulation of transcription by RNA polymerase II; negative regulation of transcription by RNA polymerase II; regulation of transcription, DNA-templated; positive regulation of transcription by RNA polymerase II	DNA-binding transcription factor activity, RNA polymerase II-specific; protein binding; nucleic acid binding; metal ion binding; DNA binding; DNA-binding transcription factor activity; RNA polymerase II regulatory region sequence-specific DNA binding; DNA-binding transcription repressor activity, RNA polymerase II-specific; DNA-binding transcription activator activity, RNA polymerase II-specific;…	nucleus; nucleoplasm; intermediate filament cytoskeleton
CLCN4	0.00280398	0.100991	0.119	0.068	1	transmembrane transport; ion transport; proton transmembrane transport; chloride transport; chloride transmembrane transport; ion transmembrane transport	nucleotide binding; ATP binding; antiporter activity; voltage-gated chloride channel activity; chloride channel activity; solute:proton antiporter activity; chloride ion binding	membrane; integral component of membrane; endoplasmic reticulum; endoplasmic reticulum membrane; endosome; late endosome membrane; Golgi apparatus; integral component of plasma membrane; plasma membrane; early endosome membrane; endosome membrane; early endosome; synaptic vesicle
ZNF626	0.00284601	-0.14309	0.268	0.367	1	regulation of transcription, DNA-templated	nucleic acid binding; metal ion binding; DNA binding	nucleus; intracellular
PDCD11	0.0028733	-0.125945	0.155	0.234	1	RNA processing; mRNA processing; rRNA processing	nucleic acid binding; protein binding; RNA binding; transcription factor binding	nucleus; nucleolus; small-subunit processome; nucleoplasm; cytosol
FNBP1L	0.00288635	-0.163426	0.814	0.876	1	endocytosis; autophagy; membrane organization; vesicle budding from membrane; vesicle organization; vesicle transport along actin filament; positive regulation of filopodium assembly; cilium assembly; clathrin-dependent endocytosis; membrane invagination; plasma membrane tubulation	protein binding; lipid binding; cadherin binding; GTPase binding	cytosol; cytoplasm; membrane; plasma membrane; cytoskeleton; cytoplasmic vesicle; cell cortex
NSRP1	0.00288943	-0.137742	0.399	0.51	1	mRNA processing; RNA splicing; regulation of alternative mRNA splicing, via spliceosome; developmental process	RNA binding; mRNA binding; protein binding	nucleus; nuclear speck; nucleoplasm; ribonucleoprotein complex
PABPC1	0.00289841	-0.135815	0.887	0.934	1	mRNA processing; RNA splicing; mRNA splicing, via spliceosome; gene silencing by RNA; positive regulation of translation; negative regulation of nuclear-transcribed mRNA catabolic process, nonsense-mediated decay; regulation of mRNA stability; positive regulation of nuclear-transcribed mRNA poly(A) tail shortening; positive regulation of nuclear-transcribed mRNA catabolic process, deadenylation-d…	RNA binding; nucleic acid binding; protein binding; protein C-terminus binding; mRNA 3'-UTR binding; poly(A) binding; poly(U) RNA binding; translation activator activity	nucleus; cytoplasm; membrane; cytosol; spliceosomal complex; catalytic step 2 spliceosome; focal adhesion; extracellular exosome; ribonucleoprotein complex; cytoplasmic stress granule; cytoplasmic ribonucleoprotein granule
SLC35F5	0.00290076	0.124945	0.262	0.189	1			membrane; integral component of membrane
SETBP1	0.00290358	-0.124213	0.466	0.584	1	regulation of transcription by RNA polymerase II	DNA binding; protein binding; DNA-binding transcription factor activity, RNA polymerase II-specific	nucleus; cytosol; nuclear body
TRAPPC2L	0.00290592	0.170076	0.485	0.402	1	endoplasmic reticulum to Golgi vesicle-mediated transport; vesicle-mediated transport; protein complex oligomerization; COPII vesicle coating	protein binding	cytoplasm; intracellular; intracellular membrane-bounded organelle; cytosol; endoplasmic reticulum; Golgi apparatus; perinuclear region of cytoplasm; Golgi membrane; TRAPP complex
ARNT2	0.00292692	-0.10455	0.067	0.125	1	regulation of transcription, DNA-templated; positive regulation of transcription, DNA-templated; positive regulation of transcription by RNA polymerase II; response to hypoxia; xenobiotic metabolic process; brain development; in utero embryonic development; central nervous system development; positive regulation of cell population proliferation; response to estradiol; negative regulation of apopt…	protein dimerization activity; DNA binding; DNA-binding transcription factor activity; protein binding; DNA-binding transcription factor activity, RNA polymerase II-specific; protein heterodimerization activity; RNA polymerase II proximal promoter sequence-specific DNA binding; DNA-binding transcription activator activity, RNA polymerase II-specific; aryl hydrocarbon receptor binding	nucleus; cytoplasm; transcription factor complex; nuclear chromatin; nucleoplasm
AL450998.2	0.0029345	-0.124567	0.152	0.223	1
CCT8	0.00294118	0.168756	0.854	0.854	1	protein stabilization; protein folding; neutrophil degranulation; positive regulation of telomere maintenance via telomerase; positive regulation of establishment of protein localization to telomere; positive regulation of protein localization to Cajal body; positive regulation of telomerase RNA localization to Cajal body; binding of sperm to zona pellucida; pore complex assembly; toxin transport	ATP binding; nucleotide binding; protein binding; unfolded protein binding; cadherin binding; ATPase activity, coupled	cytoplasm; cytosol; nucleoplasm; intermediate filament cytoskeleton; cytoskeleton; cell projection; microtubule; microtubule organizing center; extracellular region; cilium; extracellular exosome; secretory granule lumen; ficolin-1-rich granule lumen; azurophil granule lumen; centrosome; chaperonin-containing T-complex; zona pellucida receptor complex; cell body
PQBP1	0.00294367	-0.113497	0.287	0.382	1	mRNA processing; RNA splicing; positive regulation of nucleic acid-templated transcription; immune system process; innate immune response; defense response to virus; alternative mRNA splicing, via spliceosome; neuron projection development; regulation of dendrite morphogenesis; activation of innate immune response; positive regulation of defense response to virus by host; regulation of transcript…	protein binding; double-stranded DNA binding; DNA binding; transcription coactivator activity; ribonucleoprotein complex binding	nucleus; nuclear speck; cytosol; cytoplasm; cytoplasmic stress granule; neuronal ribonucleoprotein granule; nucleoplasm
[truncated: 806 more rows]
