# Supplementary material for: FGF8-mediated gene regulation affects regional identity in human cerebral organoids
Source: eLife. 2024 Nov 1;13:e98096. doi: 10.7554/eLife.98096 (PMC11581432; doi:10.7554/eLife.98096)
Supplement: Figure 6—source data 4. — Excel file listing genes with differential expression between WNTi and WNTi + FGF8 organoids in clusters 1 and 4 (glutamatergic neurons), visualized as a volcano plot in Figure 6D. [file elife-98096-fig6-data4.xlsx]

## Sheet: S21306_FGF8vsCTL_cls1-4
Gene name	p_val	avg_log2FC	pct.1	pct.2	p_val_adj	GO:biological proces	GO:molecular function	GO:cellular component
LINC02609	4.95671e-130	1.13665	0.553	0.123	1.81421e-125
NR2F1	4.03912e-123	-1.64126	0.143	0.762	1.47836e-118	regulation of transcription, DNA-templated; intracellular receptor signaling pathway; steroid hormone mediated signaling pathway; cell differentiation; regulation of transcription by RNA polymerase II; negative regulation of transcription by RNA polymerase II; positive regulation of transcription by RNA polymerase II; anatomical structure development; signal transduction; transcription initiation…	zinc ion binding; metal ion binding; DNA binding; DNA-binding transcription factor activity; sequence-specific DNA binding; steroid hormone receptor activity; RNA polymerase II regulatory region sequence-specific DNA binding; protein binding; DNA-binding transcription factor activity, RNA polymerase II-specific; RNA polymerase II proximal promoter sequence-specific DNA binding; DNA-binding transc…	nucleus; cytosol; nucleoplasm
ZNF536	2.62162e-112	0.974988	0.588	0.165	9.59539e-108	negative regulation of transcription by RNA polymerase II; negative regulation of neuron differentiation; negative regulation of retinoic acid receptor signaling pathway	nucleic acid binding; metal ion binding; DNA binding; RNA polymerase II proximal promoter sequence-specific DNA binding; DNA-binding transcription repressor activity, RNA polymerase II-specific; retinoic acid-responsive element binding	nucleus
FOXP2	2.81245e-102	0.619535	0.207	0.01	1.02939e-97	regulation of transcription, DNA-templated; negative regulation of transcription, DNA-templated; caudate nucleus development; putamen development; cerebral cortex development; negative regulation of transcription by RNA polymerase II; positive regulation of mesenchymal cell proliferation; skeletal muscle tissue development; post-embryonic development; cerebellum development; lung development; for…	DNA binding; DNA-binding transcription factor activity; sequence-specific DNA binding; metal ion binding; protein homodimerization activity; protein binding; identical protein binding; DNA-binding transcription factor activity, RNA polymerase II-specific; RNA polymerase II proximal promoter sequence-specific DNA binding; DNA-binding transcription repressor activity, RNA polymerase II-specific; pr…	nucleus; nuclear chromatin
ETV1	1.14159e-90	1.30894	0.38	0.077	4.17833e-86	regulation of transcription, DNA-templated; transcription by RNA polymerase II; cell differentiation; regulation of transcription by RNA polymerase II; positive regulation of transcription by RNA polymerase II; peripheral nervous system neuron development; axon guidance; muscle organ development; mechanosensory behavior; positive regulation of transcription, DNA-templated	DNA binding; DNA-binding transcription factor activity; sequence-specific DNA binding; protein binding; DNA-binding transcription factor activity, RNA polymerase II-specific; RNA polymerase II proximal promoter sequence-specific DNA binding; DNA-binding transcription activator activity, RNA polymerase II-specific	nucleus; nuclear chromatin
HS3ST5	2.93206e-87	0.447647	0.186	0.01	1.07316e-82	glycosaminoglycan biosynthetic process; negative regulation of coagulation; regulation of viral entry into host cell; protein sulfation; heparan sulfate proteoglycan biosynthetic process, enzymatic modification	transferase activity; sulfotransferase activity; protein binding; [heparan sulfate]-glucosamine 3-sulfotransferase 1 activity; 3'-phosphoadenosine 5'-phosphosulfate binding	membrane; integral component of membrane; Golgi apparatus; Golgi membrane
EBF2	9.01759e-85	0.55261	0.254	0.029	3.30053e-80	regulation of transcription, DNA-templated; multicellular organism development; positive regulation of transcription by RNA polymerase II; positive regulation of cold-induced thermogenesis; cell fate determination; positive regulation of chromatin binding; positive regulation of transcription, DNA-templated; brown fat cell differentiation; adipose tissue development	metal ion binding; protein dimerization activity; DNA binding; DNA-binding transcription factor activity; DNA-binding transcription activator activity, RNA polymerase II-specific; DNA-binding transcription factor activity, RNA polymerase II-specific; RNA polymerase II proximal promoter sequence-specific DNA binding; chromatin binding	nucleus; nuclear chromatin
DCHS2	4.8999e-83	0.343364	0.175	0.009	1.79341e-78	cell adhesion; homophilic cell adhesion via plasma membrane adhesion molecules; nephron development; condensed mesenchymal cell proliferation	calcium ion binding	membrane; integral component of membrane; plasma membrane
SOX5	4.5842e-82	-1.19806	0.457	0.864	1.67786e-77	regulation of transcription, DNA-templated; positive regulation of transcription by RNA polymerase II; negative regulation of transcription, DNA-templated; positive regulation of chondrocyte differentiation; transcription by RNA polymerase II; cellular response to transforming growth factor beta stimulus; cell fate commitment; positive regulation of cartilage development; asymmetric neuroblast di…	DNA binding; protein binding; DNA-binding transcription factor activity, RNA polymerase II-specific; DNA-binding transcription factor activity	nucleus; nuclear chromatin
SLC17A6	4.15708e-75	0.822487	0.566	0.203	1.52153e-70	transmembrane transport; ion transport; sodium ion transport; L-glutamate transmembrane transport; synaptic transmission, glutamatergic; neurotransmitter transport; regulation of synapse structure or activity; neurotransmitter loading into synaptic vesicle	symporter activity; L-glutamate transmembrane transporter activity; neurotransmitter transmembrane transporter activity	membrane; integral component of membrane; integral component of plasma membrane; cell junction; cytoplasmic vesicle; synapse; neuron projection; synaptic vesicle membrane; integral component of synaptic vesicle membrane; excitatory synapse
POU3F2	2.0098e-71	0.998311	0.618	0.273	7.35606e-67	regulation of transcription, DNA-templated; regulation of transcription by RNA polymerase II; cell differentiation; brain development; nervous system development; neuron development; neuron fate specification; neuron differentiation; positive regulation of cell population proliferation; epidermis development; negative regulation of gene expression; astrocyte development; Schwann cell development;…	DNA binding; DNA-binding transcription factor activity; sequence-specific DNA binding; protein binding; identical protein binding; DNA-binding transcription factor activity, RNA polymerase II-specific; RNA polymerase II proximal promoter sequence-specific DNA binding; DNA-binding transcription activator activity, RNA polymerase II-specific; transcription coactivator activity	nucleus; nuclear chromatin; transcription factor complex
PCSK2	9.21897e-71	0.655438	0.335	0.073	3.37424e-66	proteolysis; protein processing; peptide hormone processing; insulin processing; enkephalin processing; islet amyloid polypeptide processing; nervous system development; protein autoprocessing	hydrolase activity; peptidase activity; serine-type endopeptidase activity; serine-type peptidase activity; protein binding; endopeptidase activity; protein-containing complex binding	extracellular space; intracellular membrane-bounded organelle; nucleus; extracellular region; cytoplasmic vesicle; membrane; integral component of Golgi membrane; trans-Golgi network; transport vesicle; secretory granule; dendrite; neuronal cell body; perikaryon
DCC	2.21613e-68	0.849657	0.848	0.618	8.11125e-64	nervous system development; apoptotic process; axon guidance; multicellular organism development; netrin-activated signaling pathway; axonogenesis; negative regulation of netrin-activated signaling pathway; regulation of neuron death; extrinsic apoptotic signaling pathway in absence of ligand; neuron migration; negative regulation of neuron projection development; spinal cord ventral commissure m…	protein binding; netrin receptor activity; transmembrane signaling receptor activity	membrane; integral component of membrane; plasma membrane; cytosol; axon; Schaffer collateral - CA1 synapse; integral component of postsynaptic density membrane
NEUROD1	2.89378e-67	0.953286	0.56	0.226	1.05915e-62	response to glucose; positive regulation of transcription by RNA polymerase II; glucose homeostasis; nervous system development; regulation of transcription, DNA-templated; multicellular organism development; cell differentiation; positive regulation of transcription, DNA-templated; neuron development; pancreatic A cell fate commitment; pancreatic PP cell fate commitment; nucleocytoplasmic transp…	protein dimerization activity; DNA binding; protein binding; transcription coactivator activity; RNA polymerase II proximal promoter sequence-specific DNA binding; DNA-binding transcription activator activity, RNA polymerase II-specific; chromatin binding; double-stranded DNA binding; sequence-specific DNA binding; protein heterodimerization activity; E-box binding; DNA-binding transcription fact…	nucleus; cytoplasm; nuclear chromatin; nucleoplasm; RNA polymerase II transcription factor complex
PANTR1	9.77321e-67	1.26414	0.654	0.321	3.57709e-62
IGFBP5	3.00877e-66	-2.03085	0.073	0.503	1.10124e-61	positive regulation of vascular smooth muscle cell proliferation; positive regulation of vascular associated smooth muscle cell migration; negative regulation of insulin-like growth factor receptor signaling pathway; negative regulation of cell migration; negative regulation of smooth muscle cell proliferation; regulation of cell growth; osteoblast differentiation; female pregnancy; aging; hair f…	protein binding; insulin-like growth factor binding; fibronectin binding; growth factor binding; insulin-like growth factor I binding; insulin-like growth factor II binding	extracellular region; extracellular space; endoplasmic reticulum lumen; insulin-like growth factor binding protein complex; insulin-like growth factor ternary complex
PARM1	3.75984e-64	0.336663	0.15	0.01	1.37614e-59	positive regulation of telomerase activity		membrane; integral component of membrane; intracellular membrane-bounded organelle; nucleus; cytosol; Golgi apparatus; plasma membrane; Golgi membrane; endosome; early endosome; endosome membrane; late endosome
NUP93	1.13841e-62	0.984925	0.688	0.405	4.16668e-58	mRNA transport; protein transport; intracellular transport of virus; regulation of glycolytic process; mRNA export from nucleus; tRNA export from nucleus; protein import into nucleus; viral process; protein sumoylation; viral transcription; regulation of gene silencing by miRNA; regulation of cellular response to heat; SMAD protein signal transduction; nuclear envelope organization; poly(A)+ mRNA…	structural constituent of nuclear pore; protein binding	nucleus; membrane; nuclear pore; host cell; nuclear envelope; nuclear membrane; nuclear periphery
POU3F4	5.75134e-59	0.627497	0.308	0.071	2.10505e-54	regulation of transcription, DNA-templated; regulation of transcription by RNA polymerase II; brain development; transcription by RNA polymerase II; sensory perception of sound; forebrain neuron differentiation; inner ear development; cochlea morphogenesis; negative regulation of mesenchymal cell apoptotic process	DNA binding; DNA-binding transcription factor activity; sequence-specific DNA binding; RNA polymerase II regulatory region sequence-specific DNA binding; AT DNA binding; double-stranded DNA binding	nucleus
NTM	2.52407e-57	-0.951791	0.16	0.569	9.23833e-53	cell adhesion; neuron recognition	protein binding	membrane; plasma membrane; extracellular region; anchored component of membrane
FOXG1	3.23558e-57	-0.690258	0.733	0.933	1.18426e-52	regulation of transcription, DNA-templated; multicellular organism development; regulation of transcription by RNA polymerase II; negative regulation of transcription, DNA-templated; brain development; aging	DNA binding; DNA-binding transcription factor activity; sequence-specific DNA binding; protein binding; DNA-binding transcription factor activity, RNA polymerase II-specific	nucleus; nuclear chromatin; nucleoplasm
KIAA1958	2.66854e-55	0.548648	0.31	0.078	9.76713e-51		protein binding
CCND2	6.45165e-55	-0.736822	0.372	0.748	2.36137e-50	positive regulation of cell population proliferation; positive regulation of G1/S transition of mitotic cell cycle; negative regulation of apoptotic process; positive regulation of protein phosphorylation; protein phosphorylation; cell division; cell cycle; regulation of cyclin-dependent protein serine/threonine kinase activity; mitotic cell cycle phase transition; positive regulation of cyclin-d…	protein binding; protein kinase binding; protein kinase activity; cyclin-dependent protein serine/threonine kinase regulator activity	nucleus; cytoplasm; membrane; nucleoplasm; cytosol; nucleolus; nuclear membrane; chromatin; cyclin-dependent protein kinase holoenzyme complex
NELL2	1.13642e-54	-0.821512	0.38	0.758	4.15942e-50	neuron cellular homeostasis	calcium ion binding; protein binding; heparin binding; protein kinase C binding	extracellular region; cytoplasm
SEPTIN6	4.30592e-54	0.807997	0.568	0.284	1.57601e-49	cell division; cell cycle; cell differentiation; spermatogenesis; cilium assembly; viral process; cytoskeleton-dependent cytokinesis; mitotic cytokinesis	nucleotide binding; GTP binding; protein binding; GTPase activity	cytoplasm; motile cilium; chromosome; cytoskeleton; cell projection; septin complex; spindle; midbody; chromosome, centromeric region; kinetochore; condensed chromosome kinetochore; cilium; cleavage furrow; microtubule cytoskeleton; septin ring; sperm annulus; synaptic vesicle; septin collar; axon terminus; presynapse
NKAIN4	6.09252e-53	0.686494	0.479	0.201	2.22992e-48	regulation of sodium ion transport		membrane; integral component of membrane; plasma membrane
CSAD	2.3265e-51	-0.661068	0.212	0.62	8.51522e-47	carboxylic acid metabolic process; taurine biosynthetic process; L-cysteine catabolic process to hypotaurine; L-cysteine catabolic process to taurine	catalytic activity; lyase activity; carboxy-lyase activity; pyridoxal phosphate binding; aspartate 1-decarboxylase activity; sulfinoalanine decarboxylase activity	cytoplasm
NHLH1	1.13612e-50	0.966073	0.524	0.233	4.15831e-46	multicellular organism development; cell differentiation; regulation of transcription by RNA polymerase II; positive regulation of transcription by RNA polymerase II; central nervous system development	protein dimerization activity; DNA binding; protein binding; DNA-binding transcription factor activity, RNA polymerase II-specific; RNA polymerase II regulatory region sequence-specific DNA binding; DNA-binding transcription activator activity, RNA polymerase II-specific	nucleus; nuclear chromatin
NFIB	2.41295e-50	-0.930085	0.767	0.936	8.83164e-46	regulation of transcription, DNA-templated; DNA replication; positive regulation of transcription, DNA-templated; positive regulation of transcription by RNA polymerase II; negative regulation of transcription by RNA polymerase II; brain development; chondrocyte differentiation; glial cell differentiation; principal sensory nucleus of trigeminal nerve development; anterior commissure morphogenesi…	DNA binding; DNA-binding transcription factor activity; DNA-binding transcription factor activity, RNA polymerase II-specific; RNA polymerase II proximal promoter sequence-specific DNA binding; DNA-binding transcription activator activity, RNA polymerase II-specific; double-stranded DNA binding	nucleus; fibrillar center; nuclear chromatin; cerebellar mossy fiber; intracellular
FZD3	6.13623e-50	0.71724	0.87	0.701	2.24592e-45	signal transduction; cell surface receptor signaling pathway; G protein-coupled receptor signaling pathway; multicellular organism development; Wnt signaling pathway; nervous system development; canonical Wnt signaling pathway; non-canonical Wnt signaling pathway; neuron differentiation; Wnt signaling pathway, planar cell polarity pathway; Wnt signaling pathway, calcium modulating pathway; midbra…	transmembrane signaling receptor activity; G protein-coupled receptor activity; Wnt-activated receptor activity; protein binding; Wnt-protein binding; PDZ domain binding	cytoplasm; membrane; integral component of membrane; plasma membrane; cell surface; apical plasma membrane; lateral plasma membrane; axon; dendrite; filopodium tip; neuronal cell body; apical part of cell; presynaptic active zone
EOMES	9.58638e-50	0.600479	0.278	0.065	3.50871e-45	negative regulation of DNA-binding transcription factor activity; regulation of transcription, DNA-templated; multicellular organism development; cell differentiation; positive regulation of transcription, DNA-templated; immune system process; adaptive immune response; positive regulation of transcription by RNA polymerase II; negative regulation of transcription by RNA polymerase II; mesoderm fo…	DNA binding; DNA-binding transcription factor activity; RNA polymerase II regulatory region sequence-specific DNA binding; DNA-binding transcription activator activity, RNA polymerase II-specific; DNA-binding transcription factor activity, RNA polymerase II-specific; RNA polymerase II activating transcription factor binding; sequence-specific DNA binding; chromatin binding	nucleus; nuclear chromatin
EPHA5	2.54943e-49	-0.767107	0.248	0.644	9.33117e-45	protein phosphorylation; phosphorylation; transmembrane receptor protein tyrosine kinase signaling pathway; peptidyl-tyrosine phosphorylation; ephrin receptor signaling pathway; nervous system development; axon guidance; neuron development; regulation of actin cytoskeleton organization; cAMP-mediated signaling; regulation of GTPase activity; positive regulation of CREB transcription factor activi…	nucleotide binding; protein kinase activity; ATP binding; kinase activity; transferase activity; protein tyrosine kinase activity; transmembrane receptor protein tyrosine kinase activity; ephrin receptor activity; transmembrane-ephrin receptor activity; GPI-linked ephrin receptor activity; protein binding	membrane; integral component of membrane; integral component of plasma membrane; plasma membrane; cell projection; perinuclear region of cytoplasm; dendrite; receptor complex; axon; neuron projection; external side of plasma membrane; rough endoplasmic reticulum; neuronal cell body; adherens junction; cell periphery
SHTN1	7.49295e-49	-0.835968	0.449	0.767	2.7425e-44	multicellular organism development; axonogenesis; substrate-dependent cell migration, cell extension; Ras protein signal transduction; Cdc42 protein signal transduction; netrin-activated signaling pathway; positive regulation of axon extension; neuron projection morphogenesis; cytoplasmic actin-based contraction involved in cell motility; endoplasmic reticulum polarization; actin filament bundle …	protein binding; cadherin binding; actin filament binding; kinesin binding	cytoplasm; cytoskeleton; cell projection; perinuclear region of cytoplasm; axon; microtubule associated complex; microtubule cytoskeleton; lamellipodium; filopodium; growth cone; cell leading edge; perikaryon; axonal growth cone; microtubule
BHLHE22	7.01082e-48	1.20627	0.635	0.347	2.56603e-43	regulation of transcription, DNA-templated; neurogenesis; regulation of transcription by RNA polymerase II; nervous system development	protein dimerization activity; DNA-binding transcription factor activity, RNA polymerase II-specific	nucleus; nuclear chromatin
GRIA1	8.20336e-48	-0.768625	0.321	0.708	3.00251e-43	ion transport; ion transmembrane transport; ionotropic glutamate receptor signaling pathway; modulation of chemical synaptic transmission; signal transduction; endoplasmic reticulum to Golgi vesicle-mediated transport; chemical synaptic transmission; COPII vesicle coating; synaptic transmission, glutamatergic; regulation of postsynaptic cytosolic calcium ion concentration; regulation of NMDA rece…	ion channel activity; signaling receptor activity; ionotropic glutamate receptor activity; ligand-gated ion channel activity; protein binding; amyloid-beta binding; glutamate receptor activity; transmitter-gated ion channel activity involved in regulation of postsynaptic membrane potential; PDZ domain binding; neurotransmitter receptor activity involved in regulation of postsynaptic cytosolic cal…	neuronal cell body; membrane; integral component of membrane; endoplasmic reticulum; endoplasmic reticulum membrane; plasma membrane; cell projection; cell junction; synapse; postsynaptic membrane; dendrite; endosome; Golgi membrane; early endosome membrane; postsynaptic density; AMPA glutamate receptor complex; dendritic spine; recycling endosome; recycling endosome membrane; dendritic spine mem…
PAM	3.65655e-47	0.563394	0.425	0.162	1.33833e-42	oxidation-reduction process; metabolic process; peptide metabolic process; peptide amidation; fatty acid primary amide biosynthetic process; response to hypoxia; long-chain fatty acid metabolic process; regulation of transcription by RNA polymerase II; central nervous system development; heart development; lactation; response to pH; toxin metabolic process; protein amidation; protein metabolic pr…	metal ion binding; monooxygenase activity; oxidoreductase activity; zinc ion binding; catalytic activity; lyase activity; calcium ion binding; copper ion binding; protein binding; oxidoreductase activity, acting on paired donors, with incorporation or reduction of molecular oxygen, reduced ascorbate as one donor, and incorporation of one atom of oxygen; L-ascorbic acid binding; peptidylglycine mo…	membrane; integral component of membrane; extracellular region; cytoplasmic vesicle; extracellular exosome; transport vesicle membrane; secretory granule membrane; extracellular space; trans-Golgi network; plasma membrane; cell surface; secretory granule; neuron projection; neuronal cell body; perikaryon; perinuclear region of cytoplasm
NEFM	1.64835e-46	0.909276	0.5	0.226	6.03314e-42	neurofilament bundle assembly; axon development	structural molecule activity; protein binding; structural constituent of cytoskeleton; microtubule binding	intermediate filament cytoskeleton; intermediate filament; neurofilament; axon; neurofibrillary tangle
TUBB3	4.15511e-46	0.661194	0.985	0.987	1.52081e-41	cytoskeleton organization; microtubule-based process; microtubule cytoskeleton organization; mitotic cell cycle; axon guidance; neuron differentiation; netrin-activated signaling pathway; dorsal root ganglion development	nucleotide binding; GTPase activity; GTP binding; structural constituent of cytoskeleton; protein binding; netrin receptor binding	microtubule; nucleus; cytoplasm; cytoskeleton; cell projection; lamellipodium; filopodium; growth cone; extracellular exosome; dendrite; axon
AUTS2	4.78543e-46	-0.752557	0.684	0.893	1.75151e-41	positive regulation of transcription by RNA polymerase II; positive regulation of lamellipodium assembly; actin cytoskeleton reorganization; neuron migration; axon extension; dendrite extension; positive regulation of Rac protein signal transduction; positive regulation of histone H3-K4 methylation; positive regulation of histone H4-K16 acetylation	protein binding; chromatin binding	nucleus; cytoplasm; cytoskeleton; cell projection; growth cone; actin cytoskeleton
AC107886.1	1.18909e-45	0.215851	0.109	0.008	4.35219e-41
ST18	4.99369e-45	0.724515	0.504	0.239	1.82774e-40	regulation of transcription, DNA-templated; positive regulation of transcription by RNA polymerase II; negative regulation of cell population proliferation; positive regulation of cysteine-type endopeptidase activity involved in apoptotic signaling pathway; tumor necrosis factor-mediated signaling pathway; interleukin-1-mediated signaling pathway; interleukin-6-mediated signaling pathway	zinc ion binding; metal ion binding; DNA binding; DNA-binding transcription factor activity; RNA polymerase II regulatory region sequence-specific DNA binding; DNA-binding transcription activator activity, RNA polymerase II-specific; DNA-binding transcription factor activity, RNA polymerase II-specific; RNA polymerase II proximal promoter sequence-specific DNA binding; transcription regulator act…	nucleus; nuclear chromatin; protein-DNA complex
COX4I1	9.90046e-45	0.481403	0.987	0.963	3.62367e-40	proton transmembrane transport; electron transport chain; mitochondrial electron transport, cytochrome c to oxygen; generation of precursor metabolites and energy; response to nutrient	cytochrome-c oxidase activity; protein binding	membrane; integral component of membrane; nucleus; mitochondrion; mitochondrial inner membrane; mitochondrial respiratory chain complex IV; mitochondrial membrane
TMEFF1	5.65588e-44	0.661744	0.863	0.724	2.07011e-39	multicellular organism development; neuromuscular junction development; motor neuron axon guidance; animal organ morphogenesis; tissue development; dendrite development; receptor clustering	protein binding	membrane; integral component of membrane; plasma membrane; basement membrane
DHRS7	2.86222e-43	0.517571	0.378	0.14	1.0476e-38	oxidation-reduction process	oxidoreductase activity	membrane
SSBP2	3.93575e-43	-0.691997	0.376	0.701	1.44052e-38	positive regulation of transcription by RNA polymerase II; regulation of transcription, DNA-templated	DNA binding; single-stranded DNA binding; protein binding	nucleus; cytoplasm
ANK3	4.35041e-43	0.645805	0.912	0.806	1.5923e-38	positive regulation of gene expression; signal transduction; endoplasmic reticulum to Golgi vesicle-mediated transport; neuromuscular junction development; protein localization to plasma membrane; positive regulation of homotypic cell-cell adhesion; establishment of protein localization; cytoskeletal anchoring at plasma membrane; neuronal action potential; cellular response to magnesium ion; posi…	protein binding; ion channel binding; cadherin binding; protein binding, bridging; cytoskeletal protein binding; structural constituent of cytoskeleton; spectrin binding	cytoplasm; membrane; Golgi apparatus; plasma membrane; cytoskeleton; cell projection; cell junction; synapse; postsynaptic membrane; lysosome; axon; cytosol; sarcolemma; basolateral plasma membrane; cell surface; endoplasmic reticulum; T-tubule; lateral plasma membrane; sarcoplasmic reticulum; Z disc; node of Ranvier; axon initial segment; dendrite; intercalated disc; spectrin-associated cytoskel…
CADM1	5.51107e-43	-0.631727	0.545	0.843	2.01711e-38	cell adhesion; apoptotic process; multicellular organism development; cell differentiation; immune system process; spermatogenesis; viral process; homophilic cell adhesion via plasma membrane adhesion molecules; cell recognition; positive regulation of natural killer cell mediated cytotoxicity; adherens junction organization; heterophilic cell-cell adhesion via plasma membrane cell adhesion molec…	protein homodimerization activity; protein binding; signaling receptor binding; PDZ domain binding	membrane; integral component of membrane; plasma membrane; cell junction; synapse; basolateral plasma membrane; cell-cell junction
TUBB2B	1.03054e-42	0.485337	1	0.998	3.77188e-38	cytoskeleton organization; microtubule-based process; nervous system development; microtubule cytoskeleton organization; mitotic cell cycle; neuron migration; modulation of chemical synaptic transmission; embryonic brain development; positive regulation of axon guidance	nucleotide binding; GTPase activity; GTP binding; protein binding; structural constituent of cytoskeleton; protein heterodimerization activity	nucleus; cytoplasm; cytoskeleton; microtubule; Schaffer collateral - CA1 synapse; microtubule cytoskeleton
TCF4	2.17104e-42	0.672424	0.966	0.889	7.94624e-38	positive regulation of transcription by RNA polymerase II; cell differentiation; positive regulation of transcription, DNA-templated; nervous system development; positive regulation of neuron differentiation; DNA-templated transcription, initiation; transcription initiation from RNA polymerase II promoter; protein-DNA complex assembly; negative regulation of transcription by RNA polymerase II; re…	protein dimerization activity; DNA binding; DNA-binding transcription factor activity; protein binding; identical protein binding; RNA polymerase II proximal promoter sequence-specific DNA binding; DNA-binding transcription factor activity, RNA polymerase II-specific; DNA-binding transcription activator activity, RNA polymerase II-specific; protein C-terminus binding; protein heterodimerization a…	nucleus; nuclear chromatin; transcription factor complex; beta-catenin-TCF complex; beta-catenin-TCF7L2 complex
FAT4	5.41351e-42	-0.620085	0.128	0.47	1.9814e-37	cell adhesion; homophilic cell adhesion via plasma membrane adhesion molecules; hippo signaling; cerebral cortex development; cell-cell adhesion; neurogenesis; heterophilic cell-cell adhesion via plasma membrane cell adhesion molecules; branching involved in ureteric bud morphogenesis; kidney development; heart morphogenesis; plasma membrane organization; Notch signaling pathway; fibroblast growt…	calcium ion binding; protein binding	membrane; integral component of membrane; plasma membrane; extracellular exosome; apical part of cell
ABCA1	6.27324e-42	0.360228	0.212	0.045	2.29607e-37	cholesterol homeostasis; cellular response to low-density lipoprotein particle stimulus; transmembrane transport; lipid metabolic process; steroid metabolic process; cholesterol metabolic process; regulation of Cdc42 protein signal transduction; response to laminar fluid shear stress; cholesterol efflux; regulation of lipid metabolic process; lipid transport; high-density lipoprotein particle ass…	nucleotide binding; ATP binding; protein binding; ATPase activity; ATPase-coupled transmembrane transporter activity; ATPase-coupled intramembrane lipid transporter activity; lipid transporter activity; phosphatidylcholine binding; ATPase binding; signaling receptor binding; cholesterol binding; phospholipid transporter activity; high-density lipoprotein particle binding; syntaxin binding; small …	perinuclear region of cytoplasm; membrane; integral component of membrane; plasma membrane; endosome; intracellular membrane-bounded organelle; endoplasmic reticulum membrane; integral component of plasma membrane; membrane raft; Golgi apparatus; external side of plasma membrane; cell surface; endocytic vesicle; phagocytic vesicle
RBP1	2.29692e-41	0.539601	0.276	0.078	8.40695e-37	retinoic acid biosynthetic process; vitamin A metabolic process; retinoid metabolic process; lipid homeostasis; regulation of granulocyte differentiation; response to vitamin A; retinol metabolic process; retinoic acid metabolic process	lipid binding; retinal binding; retinol binding; retinoid binding; all-trans-retinol binding	cytosol; cytoplasm; nucleoplasm; lipid droplet; cell body
S100A10	4.26623e-41	0.514909	0.141	0.019	1.56148e-36	positive regulation of GTPase activity; positive regulation of stress fiber assembly; protein localization to plasma membrane; protein heterotetramerization; membrane raft assembly; positive regulation of focal adhesion assembly; vesicle budding from membrane; response to drug; positive regulation of binding	calcium ion binding; protein homodimerization activity; protein binding; ion channel binding	membrane raft; extracellular exosome; collagen-containing extracellular matrix; extracellular region; endoplasmic reticulum; extrinsic component of plasma membrane
FABP7	9.60183e-41	0.791798	0.865	0.685	3.51436e-36	triglyceride catabolic process; nervous system development; negative regulation of cell population proliferation; startle response; cell proliferation in forebrain; neurogenesis; epithelial cell proliferation; prepulse inhibition	lipid binding	cytoplasm; cytosol; nucleus; cell-cell junction; cell projection; neuronal cell body; cell body; cell periphery
HIST1H4C	7.81568e-40	-0.708248	0.47	0.772	2.86062e-35	nucleosome assembly; DNA-templated transcription, initiation; cellular protein metabolic process; regulation of gene silencing by miRNA; CENP-A containing nucleosome assembly; regulation of megakaryocyte differentiation; DNA replication-dependent nucleosome assembly; DNA replication-independent nucleosome assembly; chromatin silencing at rDNA; negative regulation of gene expression, epigenetic; p…	RNA binding; DNA binding; protein heterodimerization activity; protein binding; protein domain specific binding	nucleus; membrane; nucleosome; chromosome; extracellular region; nucleoplasm; extracellular exosome; protein-containing complex; nuclear chromosome, telomeric region; nuclear chromosome; nuclear nucleosome
AP1S2	1.58812e-39	0.740478	0.618	0.381	5.81267e-35	intracellular protein transport; vesicle-mediated transport; protein transport; antigen processing and presentation of exogenous peptide antigen via MHC class II; regulation of defense response to virus by virus	protein binding	membrane coat; membrane; Golgi apparatus; intracellular membrane-bounded organelle; cytoplasmic vesicle; cytoplasmic vesicle membrane; clathrin-coated pit; cytosol; trans-Golgi network membrane; Golgi membrane; lysosomal membrane; AP-type membrane coat adaptor complex
PEX5L	1.85398e-39	0.488088	0.269	0.079	6.78574e-35	protein import into peroxisome matrix, docking; regulation of cAMP-mediated signaling	small GTPase binding; peroxisome targeting sequence binding; peroxisome matrix targeting signal-1 binding; protein binding	cytoplasm; membrane; cytosol; peroxisomal membrane; receptor complex
STMN2	4.72445e-39	0.515777	0.991	0.979	1.7292e-34	regulation of microtubule polymerization or depolymerization; positive regulation of microtubule depolymerization; microtubule depolymerization; neuron projection development; regulation of cytoskeleton organization; positive regulation of neuron projection development; negative regulation of neuron projection development; negative regulation of microtubule depolymerization; negative regulation o…	protein binding; calcium-dependent protein binding; tubulin binding	cytoplasm; membrane; Golgi apparatus; cell projection; perinuclear region of cytoplasm; endosome; axon; neuron projection; lamellipodium; growth cone; neuronal cell body; vesicle
ARID5B	8.16377e-38	0.66073	0.455	0.211	2.98802e-33	positive regulation of nucleic acid-templated transcription; regulation of transcription by RNA polymerase II; positive regulation of DNA-binding transcription factor activity; adipose tissue development; negative regulation of transcription by RNA polymerase II; liver development; negative regulation of transcription, DNA-templated; kidney development; nitrogen compound metabolic process; male g…	transcription coactivator activity; DNA binding; protein binding; DNA-binding transcription repressor activity, RNA polymerase II-specific; transcription regulatory region DNA binding; RNA polymerase II regulatory region sequence-specific DNA binding	nucleus; nucleoplasm
TUBA1A	8.50848e-38	0.388871	1	1	3.11419e-33	microtubule-based process; microtubule cytoskeleton organization; mitotic cell cycle; G2/M transition of mitotic cell cycle; regulation of G2/M transition of mitotic cell cycle; ciliary basal body-plasma membrane docking; cytoskeleton-dependent intracellular transport; cell division; regulation of synapse organization; cytoskeleton organization	nucleotide binding; GTPase activity; GTP binding; protein binding; structural constituent of cytoskeleton; structural molecule activity; protein domain specific binding	nucleus; cytoplasm; microtubule cytoskeleton; cytoskeleton; microtubule; cytosol; extracellular exosome; recycling endosome; cytoplasmic ribonucleoprotein granule; cytoplasmic microtubule; neuromuscular junction; myelin sheath; membrane raft
NR2F1-AS1	3.53468e-37	-0.488427	0.071	0.377	1.29373e-32
PGAP1	1.22595e-36	0.685022	0.838	0.727	4.48709e-32	protein transport; nucleic acid phosphodiester bond hydrolysis; endoplasmic reticulum to Golgi vesicle-mediated transport; attachment of GPI anchor to protein; GPI anchor metabolic process; GPI anchor biosynthetic process; sensory perception of sound; embryonic pattern specification; anterior/posterior axis specification; myo-inositol transport; forebrain regionalization; head development	hydrolase activity; hydrolase activity, acting on ester bonds; nuclease activity; phosphoric ester hydrolase activity; phosphatidylinositol deacylase activity	membrane; integral component of membrane; endoplasmic reticulum; endoplasmic reticulum membrane
CD24	1.8426e-36	0.615577	0.917	0.846	6.74411e-32	cell adhesion; Wnt signaling pathway; positive regulation of protein tyrosine kinase activity; cell migration; response to hypoxia; response to molecule of bacterial origin; positive regulation of cytosolic calcium ion concentration; intrinsic apoptotic signaling pathway; response to estrogen; cholesterol homeostasis; cell-cell adhesion; regulation of epithelial cell differentiation; glomerular v…	protein binding; protein kinase binding; protein tyrosine kinase activator activity	membrane; plasma membrane; membrane raft; cell surface; anchored component of membrane; anchored component of external side of plasma membrane; intracellular membrane-bounded organelle
NEUROD2	2.60569e-36	-0.583682	0.795	0.95	9.5371e-32	nervous system development; regulation of transcription, DNA-templated; protein ubiquitination; multicellular organism development; negative regulation of nucleic acid-templated transcription; cell differentiation; regulation of neuron differentiation; regulation of transcription by RNA polymerase II; positive regulation of DNA-binding transcription factor activity; cellular response to calcium i…	protein dimerization activity; DNA binding; DNA-binding transcription factor activity, RNA polymerase II-specific; transcription corepressor activity; protein heterodimerization activity; DNA-binding transcription factor activity; E-box binding; RNA polymerase II regulatory region sequence-specific DNA binding; DNA-binding transcription activator activity, RNA polymerase II-specific	nucleus; nuclear chromatin
SLC1A2	4.29042e-36	0.682905	0.684	0.484	1.57034e-31	amino acid transport; ion transport; glutamate secretion; chemical synaptic transmission; L-glutamate transmembrane transport; protein homotrimerization; D-aspartate import across plasma membrane; L-glutamate import across plasma membrane; nervous system development; visual behavior; response to light stimulus; response to wounding; multicellular organism aging; telencephalon development; adult b…	metal ion binding; symporter activity; protein binding; L-glutamate transmembrane transporter activity; high-affinity glutamate transmembrane transporter activity; glutamate:sodium symporter activity; anion transmembrane transporter activity	membrane; integral component of membrane; plasma membrane; cell surface; integral component of plasma membrane; axon; axolemma; glutamatergic synapse; integral component of presynaptic membrane
ZBTB20	1.08451e-35	0.656362	0.545	0.302	3.96941e-31	positive regulation of glycolytic process; positive regulation of lipid biosynthetic process; lipid homeostasis; cellular response to glucose stimulus; negative regulation of transcription by RNA polymerase II; negative regulation of gene expression; positive regulation of interferon-beta production; positive regulation of interleukin-6 production; positive regulation of tumor necrosis factor pro…	nucleic acid binding; metal ion binding; DNA binding; RNA polymerase II regulatory region sequence-specific DNA binding; DNA-binding transcription repressor activity, RNA polymerase II-specific; transcription regulatory region DNA binding; protein binding	nucleus; cytoplasm; nucleoplasm; nuclear body
PARD3	9.96025e-35	0.308243	0.19	0.045	3.64555e-30	cell division; cell cycle; cell differentiation; microtubule cytoskeleton organization; axonogenesis; cell adhesion; protein targeting to membrane; protein-containing complex assembly; protein kinase C-activating G protein-coupled receptor signaling pathway; bicellular tight junction assembly; protein localization; establishment of epithelial cell polarity; establishment or maintenance of cell po…	protein binding; lipid binding; phosphatidylinositol binding; phosphatidylinositol-3-phosphate binding; phosphatidylinositol-4,5-bisphosphate binding; phosphatidylinositol-3,4,5-trisphosphate binding; protein phosphatase binding; identical protein binding	cytoplasm; membrane; plasma membrane; cell junction; cytoskeleton; bicellular tight junction; cytosol; cell cortex; endomembrane system; apical plasma membrane; adherens junction; cell-cell adherens junction; cell-cell junction; apical junction complex; internode region of axon; protein-containing complex; neuronal cell body; axonal growth cone
SOX11	1.13411e-34	0.531542	0.994	0.962	4.15096e-30	multicellular organism development; cell differentiation; positive regulation of transcription, DNA-templated; nervous system development; regulation of transcription, DNA-templated; neuron differentiation; negative regulation of transcription by RNA polymerase II; positive regulation of transcription by RNA polymerase II; positive regulation of gene expression; skeletal system development; posit…	DNA binding; DNA-binding transcription factor activity; transcription coactivator activity; DNA-binding transcription factor activity, RNA polymerase II-specific; transcription regulatory region sequence-specific DNA binding; RNA polymerase II proximal promoter sequence-specific DNA binding; enhancer sequence-specific DNA binding; DNA-binding transcription activator activity, RNA polymerase II-sp…	nucleus; cytoplasm; nuclear transcription factor complex; nuclear chromatin
SLIT1	1.29338e-34	0.634208	0.63	0.411	4.7339e-30	multicellular organism development; cell differentiation; nervous system development; axon guidance; negative chemotaxis; nuclear migration; axonogenesis; motor neuron axon guidance; olfactory bulb development; tangential migration from the subventricular zone to the olfactory bulb; telencephalon cell migration; retinal ganglion cell axon guidance; dorsal/ventral axon guidance; neuron projection …	calcium ion binding; heparin binding; Roundabout binding; protein binding	cell; extracellular space; extracellular region
NEO1	1.79918e-34	-0.588612	0.246	0.552	6.58518e-30	nervous system development; cell adhesion; axon guidance; iron ion homeostasis; positive regulation of BMP signaling pathway	protein binding; signaling receptor activity; co-receptor binding	membrane; integral component of membrane; Golgi apparatus; integral component of plasma membrane; nucleoplasm; plasma membrane; plasma membrane protein complex
STK17B	4.281e-34	0.789441	0.466	0.242	1.56689e-29	protein phosphorylation; phosphorylation; apoptotic process; protein autophosphorylation; intracellular signal transduction; positive regulation of fibroblast apoptotic process; programmed cell death	nucleotide binding; protein kinase activity; protein serine/threonine kinase activity; ATP binding; kinase activity; transferase activity	nucleus; membrane; plasma membrane; endoplasmic reticulum-Golgi intermediate compartment; actin cytoskeleton
NOL4	9.49993e-34	-0.578232	0.256	0.564	3.47707e-29		RNA binding	nucleus; nucleolus
LRRN1	1.1669e-33	0.419859	0.329	0.126	4.27097e-29	positive regulation of synapse assembly	protein binding	membrane; integral component of membrane; extracellular space; extracellular matrix
ROBO1	1.33122e-33	0.572387	0.513	0.283	4.8724e-29	positive regulation of gene expression; negative regulation of gene expression; ventricular septum morphogenesis; axon guidance; multicellular organism development; cell differentiation; chemotaxis; axon midline choice point recognition; Roundabout signaling pathway; nervous system development; cell adhesion; aorta development; homophilic cell adhesion via plasma membrane adhesion molecules; acti…	protein binding; axon guidance receptor activity; identical protein binding; LRR domain binding	cytoplasm; membrane; integral component of membrane; plasma membrane; cell projection; cell surface; axon; integral component of plasma membrane; endoplasmic reticulum-Golgi intermediate compartment membrane
SLC17A7	1.55788e-33	-0.536437	0.291	0.614	5.70201e-29	transmembrane transport; ion transport; sodium ion transport; sodium ion transmembrane transport; chloride transmembrane transport; glutamate secretion; L-glutamate transmembrane transport; synaptic transmission, glutamatergic; neurotransmitter transport; regulation of synapse structure or activity; phosphate ion transport; sodium-dependent phosphate transport; neurotransmitter loading into synap…	symporter activity; L-glutamate transmembrane transporter activity; sodium-dependent phosphate transmembrane transporter activity; neurotransmitter transmembrane transporter activity; inorganic phosphate transmembrane transporter activity; extracellularly glutamate-gated chloride channel activity; sodium:inorganic phosphate symporter activity	membrane; integral component of membrane; integral component of plasma membrane; cell junction; cytoplasmic vesicle; synapse; plasma membrane; postsynapse; neuron projection; synaptic vesicle membrane; integral component of synaptic vesicle membrane; clathrin-sculpted glutamate transport vesicle membrane; excitatory synapse; synaptic vesicle; intracellular organelle; cerebellar mossy fiber; presy…
TMSB4X	1.94687e-33	0.437404	0.998	0.997	7.12573e-29	actin filament organization; regulation of cell migration; sequestering of actin monomers; platelet degranulation; positive regulation of blood vessel endothelial cell migration; positive regulation of ATP biosynthetic process; tumor necrosis factor-mediated signaling pathway; cytoplasmic sequestering of NF-kappaB; negative regulation of NF-kappaB transcription factor activity; regulation of infl…	RNA binding; actin binding; protein binding; actin monomer binding; enzyme binding	cytoplasm; cytoskeleton; extracellular region; cytosol; platelet alpha granule lumen; nucleus
STMN1	4.68842e-33	0.432706	1	0.997	1.71601e-28	multicellular organism development; cell differentiation; nervous system development; regulation of microtubule polymerization or depolymerization; mitotic cytokinesis; axonogenesis; brain development; negative regulation of microtubule polymerization; positive regulation of cellular component movement; response to virus; microtubule depolymerization; neuron projection development; regulation of …	protein binding; tubulin binding	cytoplasm; cytoskeleton; microtubule; cytosol; membrane; neuron projection; extracellular exosome; intracellular
LHX2	1.28879e-32	0.822159	0.609	0.425	4.7171e-28	regulation of transcription, DNA-templated; positive regulation of transcription, DNA-templated; neuron differentiation; positive regulation of transcription by RNA polymerase II; neural tube closure; hair follicle development; nervous system development; axon guidance; brain development; mesoderm development; dorsal/ventral pattern formation; telencephalon development; olfactory bulb development…	metal ion binding; DNA binding; sequence-specific DNA binding; DNA-binding transcription factor activity, RNA polymerase II-specific; RNA polymerase II regulatory region sequence-specific DNA binding; RNA polymerase II proximal promoter sequence-specific DNA binding; DNA-binding transcription activator activity, RNA polymerase II-specific; chromatin binding; transcription factor binding	nucleus; nuclear chromatin
CCNI	1.32132e-32	0.406782	0.979	0.983	4.83616e-28	protein phosphorylation; regulation of cell cycle; spermatogenesis; regulation of cyclin-dependent protein serine/threonine kinase activity; mitotic cell cycle phase transition	protein kinase binding; protein kinase activity; cyclin-dependent protein serine/threonine kinase regulator activity	nucleus; cytoplasm; cyclin-dependent protein kinase holoenzyme complex
SEMA6D	2.16961e-32	0.660357	0.361	0.159	7.94099e-28	multicellular organism development; cell differentiation; nervous system development; neural crest cell migration; positive regulation of cell migration; negative regulation of axon extension involved in axon guidance; negative chemotaxis; semaphorin-plexin signaling pathway; positive regulation of smooth muscle cell migration; negative regulation of smooth muscle cell migration; ventricular syst…	semaphorin receptor binding; chemorepellent activity; protein binding	cytoplasm; membrane; integral component of membrane; Golgi apparatus; plasma membrane; extracellular space; integral component of plasma membrane
KIF5C	2.36441e-32	0.478273	0.979	0.975	8.65399e-28	mRNA transport; microtubule-based movement; axon guidance; anterograde axonal protein transport; organelle organization; motor neuron axon guidance; synaptic vesicle transport; anterograde dendritic transport of neurotransmitter receptor complex	nucleotide binding; ATP binding; microtubule motor activity; protein binding; microtubule binding; ATPase activity; ATP-dependent microtubule motor activity, plus-end-directed	neuronal cell body; cytoplasm; dendrite cytoplasm; axon cytoplasm; cytoskeleton; cell projection; microtubule; dendrite; kinesin complex; ciliary rootlet; neuron projection; axonal growth cone; distal axon
NR2F2	2.41025e-32	-0.813985	0.1	0.384	8.82176e-28	negative regulation of endothelial cell proliferation; negative regulation of endothelial cell migration; positive regulation of transcription, DNA-templated; regulation of transcription, DNA-templated; intracellular receptor signaling pathway; steroid hormone mediated signaling pathway; cell differentiation; regulation of transcription by RNA polymerase II; negative regulation of transcription b…	zinc ion binding; metal ion binding; DNA binding; DNA-binding transcription factor activity; protein homodimerization activity; sequence-specific DNA binding; protein binding; steroid hormone receptor activity; RNA polymerase II regulatory region sequence-specific DNA binding; DNA-binding transcription factor activity, RNA polymerase II-specific; transcription corepressor activity; nuclear recept…	nucleus; cytosol; nucleoplasm
TBR1	4.06439e-32	0.568892	0.874	0.765	1.48761e-27	regulation of transcription, DNA-templated; positive regulation of transcription by RNA polymerase II; negative regulation of transcription by RNA polymerase II; cell fate specification; negative regulation of transcription, DNA-templated; brain development; heart looping; conditioned taste aversion; specification of animal organ identity; regulation of gene expression; regulation of neuron proje…	DNA binding; DNA-binding transcription factor activity; protein binding; identical protein binding; RNA polymerase II regulatory region sequence-specific DNA binding; DNA-binding transcription activator activity, RNA polymerase II-specific; DNA-binding transcription factor activity, RNA polymerase II-specific; RNA polymerase II activating transcription factor binding; RNA polymerase II proximal p…	nucleus
GPR22	6.15411e-32	-0.74207	0.045	0.31	2.25247e-27	G protein-coupled receptor signaling pathway; signal transduction; cell projection organization	G protein-coupled receptor activity	membrane; integral component of membrane; plasma membrane
NAV1	7.40231e-32	0.745958	0.812	0.725	2.70932e-27	neurogenesis; multicellular organism development; cell differentiation; nervous system development; microtubule bundle formation; neuron migration		cytoplasm; cytoskeleton; microtubule; microtubule cytoskeleton; axon initial segment
SYT1	2.18678e-31	-0.499261	0.936	0.984	8.00385e-27	neurotransmitter secretion; cell differentiation; vesicle-mediated transport; protein homooligomerization; membrane organization; glutamate secretion; chemical synaptic transmission; regulation of dopamine secretion; synaptic vesicle exocytosis; calcium-ion regulated exocytosis; regulation of calcium ion-dependent exocytosis; synaptic vesicle endocytosis; calcium ion-regulated exocytosis of neuro…	metal ion binding; protein binding; calcium-dependent phospholipid binding; calcium ion binding; SNARE binding; syntaxin binding; clathrin binding; phosphatidylserine binding; syntaxin-1 binding; low-density lipoprotein particle receptor binding; 1-phosphatidylinositol binding; calmodulin binding; phospholipid binding; phosphatidylinositol-4,5-bisphosphate binding; protein C-terminus binding; syn…	cytoplasm; membrane; integral component of membrane; synaptic vesicle; cell junction; cytoplasmic vesicle; synapse; plasma membrane; axon; synaptic vesicle membrane; dense core granule; exocytic vesicle; neuron projection; clathrin-coated vesicle membrane; transport vesicle membrane; chromaffin granule membrane; clathrin-sculpted gamma-aminobutyric acid transport vesicle membrane; clathrin-sculpt…
PPP2R2B	9.74291e-31	-0.522521	0.496	0.763	3.566e-26	apoptotic process; regulation of phosphoprotein phosphatase activity; mitotic cell cycle; peptidyl-serine dephosphorylation	protein binding; protein phosphatase regulator activity; protein serine/threonine phosphatase activity	cytoplasm; membrane; mitochondrion; cytoskeleton; mitochondrial outer membrane; protein phosphatase type 2A complex; cytosol
SLF1	1.33744e-30	-0.520253	0.169	0.462	4.89516e-26	DNA repair; cellular response to DNA damage stimulus; positive regulation of double-strand break repair; positive regulation of protein complex assembly; positive regulation of maintenance of mitotic sister chromatid cohesion; protein localization to site of double-strand break	protein binding; ubiquitin protein ligase binding; protein-containing complex binding	nucleus; cytoplasm; nucleosome; cytoskeleton; centrosome; microtubule organizing center; site of double-strand break; nuclear inclusion body
EDIL3	4.65936e-30	0.533113	0.346	0.151	1.70537e-25	cell adhesion; multicellular organism development; positive regulation of cell-substrate adhesion	metal ion binding; calcium ion binding; integrin binding; extracellular matrix structural constituent	extracellular region; extracellular exosome; collagen-containing extracellular matrix; extracellular vesicle
PLXNA2	8.67525e-30	-0.548378	0.256	0.555	3.17523e-25	signal transduction; semaphorin-plexin signaling pathway; regulation of cell migration; regulation of cell shape; negative regulation of cell adhesion; regulation of GTPase activity; positive regulation of axonogenesis; semaphorin-plexin signaling pathway involved in axon guidance; somitogenesis; cell surface receptor signaling pathway; neural tube development; cerebellar granule cell precursor t…	protein binding; semaphorin receptor activity; identical protein binding	membrane; integral component of membrane; plasma membrane; integral component of plasma membrane; semaphorin receptor complex
SPOCK2	1.86159e-29	0.313786	0.194	0.053	6.81361e-25	regulation of cell differentiation; synapse assembly; extracellular matrix organization; negative regulation of endopeptidase activity; positive regulation of cell motility; positive regulation of cell-substrate adhesion; peptide cross-linking via chondroitin 4-sulfate glycosaminoglycan; cellular response to leukemia inhibitory factor	calcium ion binding; collagen binding; extracellular matrix binding; metalloendopeptidase inhibitor activity; protein binding; glycosaminoglycan binding	extracellular region; extracellular space; extracellular matrix
TOMM7	1.95464e-29	-0.417156	0.88	0.953	7.15419e-25	protein transport; protein import into mitochondrial matrix; positive regulation of protein targeting to mitochondrion; macroautophagy; regulation of protein stability; positive regulation of mitophagy in response to mitochondrial depolarization; protein targeting to mitochondrion	protein binding; protein transmembrane transporter activity	membrane; integral component of membrane; mitochondrion; mitochondrial outer membrane; mitochondrial outer membrane translocase complex
AL589740.1	2.5037e-29	0.242774	0.147	0.031	9.16378e-25
IGFBPL1	3.05867e-29	0.519996	0.9	0.775	1.11951e-24	regulation of cell growth; cellular response to tumor cell	insulin-like growth factor binding; protein binding	extracellular region; extracellular space
VAT1L	3.74092e-29	0.294996	0.184	0.048	1.36921e-24	oxidation-reduction process	zinc ion binding; oxidoreductase activity; protein binding
MOXD1	1.99631e-28	0.225501	0.12	0.021	7.30671e-24	oxidation-reduction process; octopamine biosynthetic process; dopamine catabolic process; norepinephrine biosynthetic process	metal ion binding; monooxygenase activity; oxidoreductase activity; catalytic activity; protein binding; copper ion binding; oxidoreductase activity, acting on paired donors, with incorporation or reduction of molecular oxygen, reduced ascorbate as one donor, and incorporation of one atom of oxygen; dopamine beta-monooxygenase activity	membrane; integral component of membrane; endoplasmic reticulum; endoplasmic reticulum membrane; extracellular space; cytoplasm; secretory granule membrane
SCG2	3.02444e-28	0.272008	0.63	0.367	1.10698e-23	negative regulation of endothelial cell apoptotic process; eosinophil chemotaxis; cellular protein metabolic process; post-translational protein modification; positive chemotaxis; angiogenesis; intracellular signal transduction; protein secretion; negative regulation of extrinsic apoptotic signaling pathway; MAPK cascade; negative regulation of endothelial cell proliferation; positive regulation …	protein binding; chemoattractant activity; cytokine activity	extracellular region; secretory granule; extracellular space; endoplasmic reticulum lumen; dense core granule; neuronal dense core vesicle
CD63	3.17066e-28	0.521311	0.769	0.637	1.16049e-23	protein transport; cell migration; neutrophil degranulation; platelet degranulation; regulation of vascular endothelial growth factor signaling pathway; cell-matrix adhesion; positive regulation of receptor internalization; cellular protein localization; endosome to melanosome transport; pigment granule maturation; regulation of potassium ion transmembrane transport; positive regulation of integr…	protein binding	membrane; integral component of membrane; lysosomal membrane; extracellular space; plasma membrane; extracellular region; melanosome; cell surface; lysosome; endosome; late endosome membrane; integral component of plasma membrane; extracellular exosome; endosome membrane; platelet dense granule membrane; multivesicular body membrane; intrinsic component of plasma membrane; azurophil granule membr…
TUBB	6.22413e-28	0.381445	0.994	0.991	2.27809e-23	microtubule-based process; microtubule cytoskeleton organization; mitotic cell cycle; G2/M transition of mitotic cell cycle; regulation of G2/M transition of mitotic cell cycle; ciliary basal body-plasma membrane docking; neutrophil degranulation; cellular process; cytoskeleton-dependent intracellular transport; natural killer cell mediated cytotoxicity; regulation of synapse organization; spindl…	nucleotide binding; GTPase activity; GTP binding; protein binding; structural constituent of cytoskeleton; ubiquitin protein ligase binding; MHC class I protein binding; structural molecule activity; protein domain specific binding; GTPase activating protein binding; protein-containing complex binding	nucleus; cytoplasm; cytoskeleton; microtubule; extracellular region; extracellular exosome; azurophil granule lumen; cytoplasmic ribonucleoprotein granule; nuclear envelope lumen; protein-containing complex; cell body; membrane raft
ELAVL2	7.48747e-28	0.766768	0.577	0.401	2.74049e-23	regulation of transcription, DNA-templated; mRNA splicing, via spliceosome	nucleic acid binding; RNA binding; protein binding; mRNA 3'-UTR binding	ribonucleoprotein complex; nucleoplasm
RUNX1T1	8.05141e-28	-0.661793	0.444	0.695	2.9469e-23	regulation of transcription, DNA-templated; negative regulation of transcription, DNA-templated; negative regulation of fat cell differentiation; generation of precursor metabolites and energy	metal ion binding; DNA binding; DNA-binding transcription factor activity; transcription corepressor activity; protein binding	nucleus; nucleoplasm; nuclear matrix
GABARAP	9.9179e-28	0.401248	0.966	0.932	3.63005e-23	protein transport; apoptotic process; autophagy; autophagosome assembly; autophagy of mitochondrion; cellular response to nitrogen starvation; macroautophagy; autophagosome maturation; extrinsic apoptotic signaling pathway via death domain receptors; chemical synaptic transmission; microtubule cytoskeleton organization; protein targeting	protein binding; ubiquitin protein ligase binding; microtubule binding; GABA receptor binding; beta-tubulin binding	cytoplasm; membrane; Golgi apparatus; cytoskeleton; Golgi membrane; cytoplasmic vesicle; microtubule; autophagosome; cytosol; autophagosome membrane; axoneme; endomembrane system; plasma membrane; lysosome; smooth endoplasmic reticulum; microtubule associated complex; actin cytoskeleton; cell body; perinuclear region of cytoplasm; sperm midpiece
CECR2	1.16437e-27	0.578214	0.53	0.325	4.26171e-23	ATP-dependent chromatin remodeling; neural fold formation; neural tube closure; single fertilization; neural tube development; inner ear receptor cell stereocilium organization; cochlea development; chromatin organization; vesicle-mediated transport; cytoskeleton organization; cytoskeleton-dependent cytokinesis; execution phase of apoptosis; apoptotic DNA fragmentation	protein binding	CERF complex; nuclear euchromatin; ISWI-type complex; nucleus
DACT1	2.48234e-27	-0.54087	0.103	0.36	9.08562e-23	multicellular organism development; Wnt signaling pathway; positive regulation of Wnt signaling pathway; nervous system development; negative regulation of transcription by RNA polymerase II; negative regulation of canonical Wnt signaling pathway; negative regulation of Wnt signaling pathway; regulation of protein stability; positive regulation of canonical Wnt signaling pathway; negative regulat…	protein binding; beta-catenin binding; delta-catenin binding; protein kinase C binding; protein kinase A binding; histone deacetylase binding; RNA polymerase II transcription factor binding	nucleoplasm; nucleus; cytoplasm; cell junction; synapse; cytosol; beta-catenin destruction complex
SEZ6	2.64186e-27	-0.488301	0.303	0.596	9.66946e-23	adult locomotory behavior; cerebellar Purkinje cell layer development; regulation of dendrite development; synapse maturation; excitatory postsynaptic potential; regulation of protein kinase C signaling		membrane; integral component of membrane; plasma membrane; endoplasmic reticulum; neuronal cell body; dendritic spine; dendritic shaft; perinuclear region of cytoplasm; apical dendrite
PPP1R14B	3.13387e-27	0.467186	0.927	0.908	1.14703e-22	regulation of phosphorylation; negative regulation of phosphoprotein phosphatase activity; innate immune response	protein phosphatase inhibitor activity; protein serine/threonine phosphatase inhibitor activity	cytoplasm
GLRX	5.85226e-27	0.5831	0.622	0.443	2.14198e-22	oxidation-reduction process; cell redox homeostasis; electron transport chain; nucleobase-containing small molecule interconversion; positive regulation of sodium ion transmembrane transporter activity; positive regulation of membrane potential; protein deglutathionylation	transferase activity; protein disulfide oxidoreductase activity; electron transfer activity; protein N-terminus binding; glutathione disulfide oxidoreductase activity; glutathione oxidoreductase activity	cytoplasm; cytosol; extracellular exosome; nucleus
MPP7	7.24241e-27	0.217472	0.135	0.028	2.65079e-22	positive regulation of signal transduction; positive regulation of protein complex assembly; protein localization to adherens junction; bicellular tight junction assembly; establishment of cell polarity	protein binding; cadherin binding; protein domain specific binding; molecular adaptor activity; protein heterodimerization activity; signaling adaptor activity	membrane; nucleoplasm; cell junction; bicellular tight junction; adherens junction; MPP7-DLG1-LIN7 complex
ATP2B4	1.11139e-26	-0.411285	0.094	0.344	4.06778e-22	negative regulation of nitric-oxide synthase activity; negative regulation of calcineurin-NFAT signaling cascade; negative regulation of nitric oxide biosynthetic process; negative regulation of arginine catabolic process; negative regulation of adenylate cyclase-activating adrenergic receptor signaling pathway involved in heart process; negative regulation of cardiac muscle hypertrophy in respon…	metal ion binding; nucleotide binding; ATP binding; protein binding; calcium transmembrane transporter activity, phosphorylative mechanism; protein kinase binding; PDZ domain binding; calmodulin binding; sodium channel regulator activity; scaffold protein binding; nitric-oxide synthase binding; protein phosphatase 2B binding; nitric-oxide synthase inhibitor activity	membrane; integral component of membrane; motile cilium; plasma membrane; cell projection; basolateral plasma membrane; T-tubule; sperm flagellum; sarcolemma; neuron projection; sperm principal piece; glutamatergic synapse; integral component of presynaptic active zone membrane; cilium; integral component of plasma membrane; Z disc; caveola; protein-containing complex
ST3GAL1	1.36677e-26	-0.504055	0.122	0.377	5.00252e-22	protein glycosylation; sialylation; protein phosphorylation; protein N-linked glycosylation; cellular protein modification process; O-glycan processing; keratan sulfate biosynthetic process; N-acetylneuraminate metabolic process	transferase activity; sialyltransferase activity; transferase activity, transferring glycosyl groups; beta-galactoside (CMP) alpha-2,3-sialyltransferase activity	membrane; integral component of membrane; Golgi apparatus; extracellular region; Golgi cisterna membrane; extracellular exosome; Golgi membrane
SLC8A1	1.63878e-26	-0.61062	0.329	0.585	5.99808e-22	regulation of cardiac muscle contraction by regulation of the release of sequestered calcium ion; regulation of heart rate; transmembrane transport; ion transport; sodium ion transport; calcium ion transport; calcium ion transmembrane transport; cell communication; positive regulation of bone mineralization; muscle contraction; regulation of cardiac conduction; sodium ion transmembrane transport;…	metal ion binding; protein binding; antiporter activity; calcium ion binding; calmodulin binding; calcium:sodium antiporter activity; ion channel binding; ankyrin binding; cytoskeletal protein binding; ion antiporter activity involved in regulation of postsynaptic membrane potential; calcium:cation antiporter activity involved in regulation of postsynaptic cytosolic calcium ion concentration	membrane; integral component of membrane; nucleoplasm; plasma membrane; sarcolemma; Z disc; integral component of plasma membrane; T-tubule; intercalated disc; mitochondrion; microtubule; cell projection; dendritic spine; dendritic shaft; postsynaptic membrane; integral component of postsynaptic membrane
SLC4A10	2.02306e-26	-0.400007	0.066	0.303	7.40462e-22	ion transport; sodium ion transport; chloride transport; anion transport; anion transmembrane transport; visual perception; regulation of short-term neuronal synaptic plasticity; bicarbonate transport; regulation of intracellular pH; inorganic anion transport; regulation of pH; response to light stimulus; post-embryonic development; pyramidal neuron development; regulation of cellular pH; multice…	symporter activity; antiporter activity; anion transmembrane transporter activity; inorganic anion exchanger activity; sodium:bicarbonate symporter activity; anion:anion antiporter activity	membrane; integral component of membrane; plasma membrane; cell projection; cell junction; synapse; dendrite; axon; perikaryon; basolateral plasma membrane; apical plasma membrane; neuronal cell body; somatodendritic compartment; axon terminus; apical dendrite; basal dendrite; CA3 pyramidal cell dendrite
DNER	4.05798e-26	0.532557	0.592	0.389	1.48526e-21	Notch signaling pathway; endocytosis; neuron migration; synapse assembly; central nervous system development; Notch receptor processing; glial cell differentiation; skeletal muscle fiber development	calcium ion binding; Notch binding; protein binding; transmembrane signaling receptor activity; clathrin binding	membrane; integral component of membrane; plasma membrane; dendrite; early endosome; neuronal cell body
LRRC7	7.21264e-26	-0.474824	0.256	0.542	2.6399e-21		protein binding
MT1X	1.27452e-25	0.50375	0.28	0.115	4.66487e-21	negative regulation of growth; cellular zinc ion homeostasis; detoxification of copper ion; cellular response to erythropoietin; cellular response to cadmium ion; cellular response to copper ion; cellular response to zinc ion; response to metal ion	metal ion binding; zinc ion binding; protein binding	nucleus; cytoplasm; perinuclear region of cytoplasm
KITLG	1.38149e-25	0.265828	0.135	0.03	5.05639e-21	positive regulation of cell population proliferation; cell adhesion; ovarian follicle development; neural crest cell migration; positive regulation of leukocyte migration; positive regulation of myeloid leukocyte differentiation; negative regulation of mast cell apoptotic process; ectopic germ cell programmed cell death; negative regulation of apoptotic process; positive regulation of MAP kinase …	growth factor activity; protein binding; cytokine activity; stem cell factor receptor binding	cytoplasm; membrane; integral component of membrane; plasma membrane; cytoskeleton; cell projection; extracellular region; extracellular space; lamellipodium; filopodium
MAML3	1.60908e-25	0.472567	0.372	0.189	5.88938e-21	Notch signaling pathway; positive regulation of transcription by RNA polymerase II; transcription initiation from RNA polymerase II promoter; positive regulation of transcription of Notch receptor target; positive regulation of Notch signaling pathway	transcription coactivator activity	nucleus; nuclear speck; nucleoplasm
SNCA	1.66141e-25	-0.459015	0.391	0.682	6.08093e-21	activation of cysteine-type endopeptidase activity involved in apoptotic process; positive regulation of apoptotic process; negative regulation of monooxygenase activity; negative regulation of apoptotic process; oxidation-reduction process; apoptotic process; protein destabilization; cellular protein metabolic process; response to lipopolysaccharide; regulation of dopamine secretion; positive re…	metal ion binding; oxidoreductase activity; zinc ion binding; protein binding; magnesium ion binding; calcium ion binding; identical protein binding; SNARE binding; dynein complex binding; alpha-tubulin binding; histone binding; copper ion binding; kinesin binding; cysteine-type endopeptidase inhibitor activity involved in apoptotic process; Hsp70 protein binding; tau protein binding; cuprous ion…	nucleus; cytoplasm; membrane; extracellular space; cytosol; plasma membrane; extracellular region; perinuclear region of cytoplasm; cell junction; synapse; postsynapse; axon; growth cone; supramolecular fiber; cell cortex; protein-containing complex; mitochondrion; actin cytoskeleton; platelet alpha granule membrane; lysosome; inclusion body; nuclear outer membrane; mitochondrial outer membrane; …
GABRB2	1.99235e-25	-0.683558	0.124	0.371	7.2922e-21	ion transport; chloride transport; ion transmembrane transport; signal transduction; regulation of postsynaptic membrane potential; chemical synaptic transmission; regulation of membrane potential; nervous system process; gamma-aminobutyric acid signaling pathway; inhibitory synapse assembly; chloride transmembrane transport; synaptic transmission, GABAergic; cellular response to histamine; senso…	ion channel activity; transmembrane signaling receptor activity; chloride channel activity; GABA-A receptor activity; extracellular ligand-gated ion channel activity; GABA-gated chloride ion channel activity; GABA receptor activity; inhibitory extracellular ligand-gated ion channel activity; transmitter-gated ion channel activity involved in regulation of postsynaptic membrane potential	membrane; integral component of membrane; plasma membrane; cell junction; cytoplasmic vesicle; synapse; postsynaptic membrane; cytoplasmic vesicle membrane; chloride channel complex; integral component of plasma membrane; neuron projection; extracellular exosome; GABA-A receptor complex; cytosol; GABA-ergic synapse; integral component of postsynaptic specialization membrane; GABA receptor complex
C11orf96	2.91583e-25	-0.47809	0.158	0.418	1.06722e-20
ECI1	3.88676e-25	0.343127	0.248	0.093	1.42259e-20	lipid metabolic process; fatty acid metabolic process; fatty acid beta-oxidation	isomerase activity; catalytic activity; dodecenoyl-CoA delta-isomerase activity; enoyl-CoA hydratase activity	mitochondrion; mitochondrial matrix
NFIX	6.61201e-25	-0.359571	0.028	0.237	2.42006e-20	regulation of transcription, DNA-templated; DNA replication; negative regulation of transcription by RNA polymerase II; positive regulation of transcription by RNA polymerase II; transcription by RNA polymerase II	DNA binding; DNA-binding transcription factor activity; protein binding; DNA-binding transcription factor activity, RNA polymerase II-specific	nucleus; nuclear chromatin; intracellular; nucleoplasm
CDH7	7.57877e-25	-0.79348	0.109	0.354	2.77391e-20	cell adhesion; homophilic cell adhesion via plasma membrane adhesion molecules; cell-cell adhesion; cell-cell junction assembly; adherens junction organization; cell morphogenesis; calcium-dependent cell-cell adhesion via plasma membrane cell adhesion molecules; cell-cell adhesion mediated by cadherin	metal ion binding; calcium ion binding; cadherin binding; protein homodimerization activity; cytoskeletal protein binding	membrane; integral component of membrane; plasma membrane; cell surface; cell-cell adherens junction; catenin complex
FYN	8.46544e-25	0.472423	0.85	0.781	3.09843e-20	cellular response to amyloid-beta; response to amyloid-beta; negative regulation of dendritic spine maintenance; negative regulation of oxidative stress-induced cell death; protein phosphorylation; phosphorylation; calcium ion transport; multicellular organism development; immune system process; adaptive immune response; Fc-gamma receptor signaling pathway involved in phagocytosis; leukocyte migr…	protein binding; metal ion binding; nucleotide binding; protein kinase activity; ATP binding; kinase activity; transferase activity; protein tyrosine kinase activity; non-membrane spanning protein tyrosine kinase activity; identical protein binding; signaling receptor binding; tau protein binding; growth factor receptor binding; tau-protein kinase activity; disordered domain specific binding; typ…	cytosol; plasma membrane; nucleus; cytoplasm; membrane; extrinsic component of cytoplasmic side of plasma membrane; cell body; endosome; membrane raft; postsynaptic density; dendrite; perinuclear region of cytoplasm; glial cell projection; mitochondrion; perinuclear endoplasmic reticulum; actin filament; intracellular membrane-bounded organelle; cell periphery; Schaffer collateral - CA1 synapse; …
FLRT2	8.741e-25	-0.544596	0.103	0.338	3.19929e-20	cell adhesion; multicellular organism development; fibroblast growth factor receptor signaling pathway; heart morphogenesis; axon guidance; negative chemotaxis; positive regulation of synapse assembly; cell adhesion involved in heart morphogenesis; basement membrane organization; regulation of neuron migration	protein binding, bridging; fibroblast growth factor receptor binding; chemorepellent activity; protein binding	membrane; integral component of membrane; endoplasmic reticulum; endoplasmic reticulum membrane; organelle membrane; intracellular membrane-bounded organelle; plasma membrane; extracellular region; cell junction; synapse; focal adhesion; integral component of plasma membrane; extracellular exosome; neuron projection; extracellular matrix; cell-cell junction; extracellular space
HEY1	1.06653e-24	-0.509844	0.239	0.498	3.9036e-20	positive regulation of gene expression; positive regulation of transcription by RNA polymerase II; ventricular septum morphogenesis; negative regulation of Notch signaling pathway; regulation of transcription, DNA-templated; multicellular organism development; Notch signaling pathway; cell differentiation; negative regulation of transcription by RNA polymerase II; anterior/posterior pattern speci…	protein dimerization activity; DNA binding; DNA-binding transcription factor activity; RNA polymerase II regulatory region sequence-specific DNA binding; protein binding; DNA-binding transcription factor activity, RNA polymerase II-specific; DNA-binding transcription repressor activity, RNA polymerase II-specific; transcription factor binding	nucleus; cytoplasm; nuclear chromatin; nucleoplasm
LMO3	1.45587e-24	-0.898374	0.395	0.639	5.32863e-20	negative regulation of ERK1 and ERK2 cascade; positive regulation of fat cell differentiation; positive regulation of peroxisome proliferator activated receptor signaling pathway; positive regulation of glucocorticoid receptor signaling pathway	metal ion binding; protein binding	cytoplasm
MGLL	2.45231e-24	-0.426781	0.081	0.309	8.9757e-20	lipid metabolic process; lipid catabolic process; fatty acid metabolic process; fatty acid biosynthetic process; triglyceride catabolic process; inflammatory response; monoacylglycerol catabolic process; regulation of signal transduction; arachidonic acid metabolic process; regulation of inflammatory response; acylglycerol acyl-chain remodeling; acylglycerol catabolic process; regulation of senso…	hydrolase activity; protein homodimerization activity; protein binding; carboxylic ester hydrolase activity; acylglycerol lipase activity; lysophospholipase activity	cytoplasm; membrane; nucleoplasm; cytosol; plasma membrane; endoplasmic reticulum membrane; extrinsic component of membrane
POU3F3	2.59321e-24	0.470179	0.795	0.634	9.49139e-20	negative regulation of apoptotic process; regulation of transcription, DNA-templated; regulation of transcription by RNA polymerase II; multicellular organism development; positive regulation of transcription, DNA-templated; brain development; nervous system development; positive regulation of gene expression; positive regulation of cell population proliferation; central nervous system developmen…	DNA binding; DNA-binding transcription factor activity; sequence-specific DNA binding; DNA-binding transcription factor activity, RNA polymerase II-specific; HMG box domain binding	nucleus; nuclear chromatin
SPINT2	2.69133e-24	-0.472741	0.291	0.565	9.85054e-20	negative regulation of endopeptidase activity; negative regulation of peptidase activity; neural tube closure; establishment or maintenance of cell polarity; negative regulation of cell-cell adhesion; epithelial cell morphogenesis involved in placental branching; basement membrane organization; cellular response to BMP stimulus; negative regulation of cell motility; negative regulation of neural …	serine-type endopeptidase inhibitor activity; peptidase inhibitor activity; endopeptidase inhibitor activity	membrane; integral component of membrane; extracellular region; cytoplasm; plasma membrane
B2M	5.94754e-24	0.859853	0.481	0.294	2.17686e-19	immune response; immune system process; regulation of immune response; antigen processing and presentation of peptide antigen via MHC class I; cellular protein metabolic process; retina homeostasis; antigen processing and presentation of exogenous peptide antigen via MHC class I, TAP-dependent; innate immune response; neutrophil degranulation; positive regulation of receptor-mediated endocytosis;…	protein binding; identical protein binding; protein homodimerization activity	membrane; Golgi apparatus; cytosol; plasma membrane; extracellular space; extracellular region; cell surface; focal adhesion; MHC class I protein complex; extracellular exosome; phagocytic vesicle membrane; HFE-transferrin receptor complex; endoplasmic reticulum lumen; specific granule lumen; tertiary granule lumen; Golgi membrane; ER to Golgi transport vesicle membrane; MHC class I peptide loadi…
MAP2	7.55041e-24	0.377122	0.976	0.982	2.76353e-19	microtubule bundle formation; central nervous system neuron development; microtubule cytoskeleton organization; neuron projection development; regulation of cellular protein localization; regulation of microtubule polymerization; dendrite development; negative regulation of axon extension; negative regulation of microtubule polymerization; dendrite morphogenesis; positive regulation of anterograd…	protein binding; microtubule binding; tubulin binding; calmodulin binding; dystroglycan binding; tau protein binding; structural molecule activity	cytoplasm; neuronal cell body; nucleolus; cytosol; cytoskeleton; cell projection; microtubule; dendrite; neuron projection; microtubule associated complex; axon initial segment; dendritic growth cone; dendrite cytoplasm; dendritic shaft; axon hillock; dendritic branch; basal dendrite; primary dendrite; distal dendrite; apical distal dendrite; dendritic filopodium; proximal dendrite; proximal neur…
EBF1	8.52739e-24	0.182373	0.118	0.024	3.12111e-19	regulation of transcription, DNA-templated; multicellular organism development; positive regulation of transcription by RNA polymerase II	metal ion binding; protein dimerization activity; DNA binding; DNA-binding transcription factor activity; protein binding; DNA-binding transcription activator activity, RNA polymerase II-specific; DNA-binding transcription factor activity, RNA polymerase II-specific; C2H2 zinc finger domain binding	nucleus; nuclear chromatin
LZTS1	8.57367e-24	0.507323	0.464	0.282	3.13805e-19	cell cycle; regulation of transcription, DNA-templated; transcription, DNA-templated; negative regulation of macroautophagy; mitotic cell cycle phase transition; regulation of synaptic plasticity; regulation of dendrite morphogenesis	DNA binding; protein binding; microtubule binding; DNA-binding transcription factor activity	cytoplasm; membrane; plasma membrane; cell projection; cell junction; synapse; postsynaptic membrane; postsynaptic density; dendritic spine; apical plasma membrane; neuron projection; dendritic shaft; cell body
DUSP6	1.13329e-23	0.283602	0.165	0.047	4.14797e-19	protein dephosphorylation; dephosphorylation; peptidyl-tyrosine dephosphorylation; inactivation of MAPK activity; negative regulation of protein phosphorylation; response to organic substance; positive regulation of cell death; response to organic cyclic compound; cell differentiation; response to drug; regulation of heart growth; negative regulation of ERK1 and ERK2 cascade; response to growth f…	hydrolase activity; phosphoprotein phosphatase activity; phosphatase activity; protein tyrosine/serine/threonine phosphatase activity; MAP kinase tyrosine/serine/threonine phosphatase activity; protein tyrosine phosphatase activity	cytoplasm; cytosol; nucleoplasm
KLHL23	2.13686e-23	-0.401641	0.598	0.808	7.82114e-19		protein binding
GAPDH	2.44619e-23	0.300331	0.994	0.986	8.95332e-19	oxidation-reduction process; glycolytic process; apoptotic process; glucose metabolic process; protein stabilization; regulation of translation; cellular response to interferon-gamma; antimicrobial humoral immune response mediated by antimicrobial peptide; negative regulation of translation; microtubule cytoskeleton organization; gluconeogenesis; canonical glycolysis; neuron apoptotic process; ki…	nucleotide binding; transferase activity; oxidoreductase activity; NADP binding; protein binding; NAD binding; oxidoreductase activity, acting on the aldehyde or oxo group of donors, NAD or NADP as acceptor; microtubule binding; identical protein binding; glyceraldehyde-3-phosphate dehydrogenase (NAD+) (phosphorylating) activity; disordered domain specific binding; aspartic-type endopeptidase inh…	nucleus; cytoplasm; membrane; intracellular membrane-bounded organelle; cytosol; plasma membrane; nuclear membrane; cytoskeleton; perinuclear region of cytoplasm; microtubule cytoskeleton; extracellular exosome; ribonucleoprotein complex; vesicle; lipid droplet; GAIT complex
HOMER3	3.9986e-23	0.462306	0.355	0.183	1.46353e-18	G protein-coupled glutamate receptor signaling pathway; regulation of store-operated calcium entry; protein targeting; negative regulation of calcineurin-NFAT signaling cascade; negative regulation of interleukin-2 production	protein binding; identical protein binding; G protein-coupled glutamate receptor binding	cytoplasm; membrane; plasma membrane; cell junction; synapse; postsynaptic membrane; neuron projection; cytosol; postsynaptic density; dendrite
ARPP21	4.94487e-23	-0.61706	0.239	0.495	1.80987e-18	cellular response to heat	nucleic acid binding; calmodulin binding	cytoplasm
RPL38	5.0751e-23	-0.287292	0.983	0.998	1.85754e-18	translation; cytoplasmic translation; viral transcription; translational initiation; nuclear-transcribed mRNA catabolic process, nonsense-mediated decay; SRP-dependent cotranslational protein targeting to membrane; skeletal system development; ossification; regulation of translation; sensory perception of sound; 90S preribosome assembly; middle ear morphogenesis; axial mesoderm development	structural constituent of ribosome; RNA binding	ribosome; focal adhesion; cytosolic large ribosomal subunit; cytosol; postsynaptic density; polysomal ribosome; intracellular; eukaryotic 80S initiation complex; synapse
GAB1	5.16257e-23	0.215733	0.16	0.045	1.88955e-18	positive regulation of angiogenesis; vascular endothelial growth factor signaling pathway; axon guidance; positive regulation of phosphatidylinositol 3-kinase signaling; positive regulation of protein kinase B signaling; ERBB2 signaling pathway; angiogenesis; actin cytoskeleton reorganization; epidermal growth factor receptor signaling pathway; insulin receptor signaling pathway; response to hepa…	protein binding; SH3/SH2 adaptor activity	cytosol; cell-cell junction
PDE1A	5.88748e-23	-0.545876	0.506	0.734	2.15488e-18	signal transduction; G protein-coupled receptor signaling pathway; regulation of smooth muscle cell apoptotic process; cGMP catabolic process; regulation of smooth muscle cell proliferation	metal ion binding; hydrolase activity; phosphoric diester hydrolase activity; 3',5'-cyclic-nucleotide phosphodiesterase activity; calmodulin binding; calmodulin-dependent cyclic-nucleotide phosphodiesterase activity; calcium- and calmodulin-regulated 3',5'-cyclic-GMP phosphodiesterase activity	cytosol; neuronal cell body; nucleus; cytoplasm
FSTL5	9.28313e-23	0.619782	0.455	0.263	3.39772e-18	cell differentiation; multicellular organism development	metal ion binding; calcium ion binding; protein binding	extracellular region
DLG2	1.05716e-22	-0.416219	0.109	0.339	3.86931e-18	receptor clustering; maintenance of postsynaptic density structure; chemical synaptic transmission; MAPK cascade; negative regulation of phosphatase activity; GMP metabolic process; GDP metabolic process; cell-cell adhesion; regulation of NMDA receptor activity; establishment or maintenance of epithelial cell apical/basal polarity; receptor localization to synapse; cellular response to potassium …	protein binding; guanylate kinase activity; kinase binding; structural constituent of postsynaptic density	membrane; axon cytoplasm; plasma membrane; cell projection; cell junction; synapse; postsynaptic membrane; axon; neuron projection; cytosol; postsynaptic density; neuromuscular junction; basolateral plasma membrane; postsynaptic density membrane; voltage-gated potassium channel complex; ionotropic glutamate receptor complex; juxtaparanode region of axon; glutamatergic synapse
KCNK12	1.12788e-22	-0.34959	0.032	0.229	4.12815e-18	ion transport; potassium ion transport; regulation of ion transmembrane transport; potassium ion transmembrane transport; stabilization of membrane potential	voltage-gated ion channel activity; potassium channel activity; potassium ion leak channel activity	membrane; integral component of membrane; integral component of plasma membrane
ENC1	1.12846e-22	0.750221	0.771	0.686	4.13026e-18	nervous system development; protein ubiquitination; multicellular organism development; proteasomal ubiquitin-independent protein catabolic process; negative regulation of translation; positive regulation of neuron projection development	actin binding; protein binding	nucleus; cytoplasm; cytoskeleton; nuclear matrix; Cul3-RING ubiquitin ligase complex; nuclear chromatin; nucleoplasm; nucleolus; neuronal cell body
BCAP29	1.12935e-22	-0.439529	0.288	0.541	4.13353e-18	intracellular protein transport; protein transport; apoptotic process; vesicle-mediated transport; endoplasmic reticulum to Golgi vesicle-mediated transport; protein localization to endoplasmic reticulum exit site; osteoblast differentiation		membrane; integral component of membrane; endoplasmic reticulum; endoplasmic reticulum membrane; integral component of plasma membrane
EMX2	1.13707e-22	0.558984	0.35	0.182	4.16179e-18	regulation of transcription, DNA-templated; multicellular organism development; negative regulation of transcription by RNA polymerase II; neuron differentiation; regulation of transcription by RNA polymerase II; central nervous system development; brain development; anterior/posterior pattern specification; regulation of gene expression; dentate gyrus development; cerebral cortex regionalization…	DNA binding; sequence-specific DNA binding; protein binding; RNA polymerase II proximal promoter sequence-specific DNA binding; DNA-binding transcription factor activity, RNA polymerase II-specific; DNA-binding transcription repressor activity, RNA polymerase II-specific; RNA polymerase II intronic transcription regulatory region sequence-specific DNA binding	nucleus; nuclear chromatin
LINC01122	1.29913e-22	-0.426024	0.241	0.501	4.75495e-18
DOK6	1.82745e-22	-0.578404	0.194	0.424	6.68863e-18	axon guidance	protein binding	cytosol
DUT	2.15646e-22	0.432754	0.588	0.411	7.89285e-18	dUMP biosynthetic process; dUTP catabolic process; dUTP metabolic process; nucleotide metabolic process; nucleobase-containing compound metabolic process; nucleobase-containing small molecule interconversion; DNA replication	magnesium ion binding; dUTP diphosphatase activity; RNA binding; hydrolase activity; protein binding	nucleoplasm; nucleus; mitochondrion; extracellular exosome
SLC38A1	2.64671e-22	0.509526	0.65	0.493	9.68724e-18	ion transport; sodium ion transport; amino acid transmembrane transport; amino acid transport; L-alpha-amino acid transmembrane transport; neutral amino acid transport; neurotransmitter uptake; glutamine transport; female pregnancy	symporter activity; protein binding; amino acid transmembrane transporter activity; neutral amino acid transmembrane transporter activity; amino acid:sodium symporter activity; L-amino acid transmembrane transporter activity; L-glutamine transmembrane transporter activity	membrane; integral component of membrane; plasma membrane; integral component of plasma membrane; extracellular exosome; axon
NME1	2.97162e-22	-0.393001	0.656	0.822	1.08764e-17	phosphorylation; DNA metabolic process; cell differentiation; nucleoside diphosphate phosphorylation; GTP biosynthetic process; UTP biosynthetic process; CTP biosynthetic process; nucleotide metabolic process; nervous system development; endocytosis; negative regulation of cell population proliferation; regulation of apoptotic process; purine nucleotide metabolic process; pyrimidine nucleotide me…	RNA binding; metal ion binding; nucleotide binding; ATP binding; kinase activity; transferase activity; GTP binding; protein binding; magnesium ion binding; nucleoside diphosphate kinase activity; identical protein binding; ribosomal small subunit binding; deoxyribonuclease activity; RNA polymerase II regulatory region sequence-specific DNA binding; single-stranded DNA binding; intermediate filam…	nucleus; cytoplasm; membrane; cytosol; extracellular exosome; ruffle membrane; mitochondrial outer membrane; centrosome; intermediate filament; perinuclear region of cytoplasm
BAZ2B	3.06869e-22	0.484442	0.667	0.509	1.12317e-17	chromatin remodeling; regulation of transcription by RNA polymerase II	metal ion binding; DNA binding; protein binding	nucleus
UNC5A	5.81858e-22	-0.321555	0.051	0.255	2.12966e-17	signal transduction; apoptotic process; multicellular organism development; netrin-activated signaling pathway; axon guidance; neuron projection development; anterior/posterior axon guidance	netrin receptor activity; protein binding	membrane; integral component of membrane; plasma membrane; cell projection; membrane raft; intrinsic component of plasma membrane; neuronal cell body membrane; neuron projection membrane
MALAT1	6.25593e-22	-0.324847	1	0.999	2.28973e-17
TSPAN18	6.47636e-22	-0.386006	0.145	0.378	2.37041e-17			membrane; integral component of membrane; integral component of plasma membrane
FNDC5	6.87817e-22	0.369043	0.218	0.083	2.51748e-17	response to muscle activity; positive regulation of brown fat cell differentiation; signal transduction	protein binding; hormone activity	membrane; integral component of membrane; extracellular region; endoplasmic reticulum; plasma membrane; peroxisome; peroxisomal membrane
NT5DC1	7.09577e-22	0.276168	0.165	0.05	2.59712e-17	dephosphorylation	metal ion binding; hydrolase activity; 5'-nucleotidase activity
GSTP1	7.89069e-22	-0.443716	0.677	0.851	2.88807e-17	negative regulation of ERK1 and ERK2 cascade; negative regulation of MAPK cascade; negative regulation of fibroblast proliferation; negative regulation of MAP kinase activity; negative regulation of JUN kinase activity; cellular response to lipopolysaccharide; negative regulation of tumor necrosis factor-mediated signaling pathway; regulation of ERK1 and ERK2 cascade; negative regulation of prote…	transferase activity; protein binding; glutathione transferase activity; glutathione peroxidase activity; drug binding; JUN kinase binding; kinase regulator activity; protein kinase binding; S-nitrosoglutathione binding; dinitrosyl-iron complex binding; glutathione binding; nitric oxide binding	nucleus; cytoplasm; cytosol; mitochondrion; extracellular space; extracellular region; extracellular exosome; secretory granule lumen; ficolin-1-rich granule lumen; vesicle; plasma membrane; TRAF2-GSTP1 complex
MEF2C	9.02993e-22	-0.660858	0.154	0.374	3.30504e-17	negative regulation of blood vessel endothelial cell migration; negative regulation of vascular endothelial cell proliferation; negative regulation of vascular smooth muscle cell proliferation; negative regulation of vascular associated smooth muscle cell migration; positive regulation of transcription by RNA polymerase II; apoptotic process; multicellular organism development; cell differentiati…	transcription regulatory region DNA binding; protein dimerization activity; DNA binding; protein binding; RNA polymerase II regulatory region sequence-specific DNA binding; sequence-specific DNA binding; RNA polymerase II proximal promoter sequence-specific DNA binding; DNA-binding transcription factor activity, RNA polymerase II-specific; transcription factor binding; histone deacetylase binding…	nucleus; cytoplasm; intracellular membrane-bounded organelle; nucleoplasm; postsynapse; nuclear chromatin; protein-containing complex; nuclear speck; sarcoplasm; cytosol
DCX	1.00661e-21	0.387513	0.97	0.966	3.68428e-17	intracellular signal transduction; multicellular organism development; cell differentiation; nervous system development; central nervous system development; neuron migration; axoneme assembly; photoreceptor cell development; retina development in camera-type eye; brain development; hippocampus development; layer formation in cerebral cortex; pyramidal neuron development; central nervous system pr…	protein binding; microtubule binding; protein kinase binding	cytoplasm; cytosol; cell projection; microtubule; neuron projection; cytoskeleton; microtubule associated complex; axoneme
GPX4	1.07091e-21	0.407177	0.842	0.766	3.91965e-17	oxidation-reduction process; multicellular organism development; cellular oxidant detoxification; spermatogenesis; response to oxidative stress; phospholipid metabolic process; lipoxygenase pathway; long-chain fatty acid biosynthetic process; chromatin organization; glutathione metabolic process; aging; response to estradiol; regulation of inflammatory response; protein polymerization; negative r…	oxidoreductase activity; peroxidase activity; glutathione peroxidase activity; protein binding; identical protein binding; selenium binding; phospholipid-hydroperoxide glutathione peroxidase activity	nucleus; cytoplasm; nucleoplasm; mitochondrion; cytosol; extracellular exosome; protein-containing complex; nuclear envelope
BTG1	1.35629e-21	0.4183	0.865	0.732	4.96417e-17	negative regulation of cell population proliferation; cell migration; regulation of transcription, DNA-templated; negative regulation of cell growth; positive regulation of angiogenesis; positive regulation of fibroblast apoptotic process; negative regulation of mitotic cell cycle; positive regulation of myoblast differentiation; response to oxidative stress; spermatogenesis; response to peptide …	protein binding; enzyme binding; transcription coregulator activity; kinase binding	nucleus; cytoplasm; nucleoplasm
EFNA5	1.44289e-21	0.443067	0.291	0.132	5.28112e-17	positive regulation of protein phosphorylation; multicellular organism development; cell differentiation; ephrin receptor signaling pathway; nervous system development; axon guidance; regulation of microtubule cytoskeleton organization; regulation of actin cytoskeleton organization; activation of transmembrane receptor protein tyrosine kinase activity; regulation of GTPase activity; positive regu…	protein binding; ephrin receptor binding; transmembrane receptor protein tyrosine kinase activator activity; neurotrophin TRKA receptor binding; neurotrophin TRKB receptor binding; neurotrophin TRKC receptor binding; chemorepellent activity	membrane; plasma membrane; caveola; anchored component of membrane; anchored component of external side of plasma membrane; basement membrane; adherens junction; cell periphery; GABA-ergic synapse; integral component of membrane
ID2	1.49664e-21	-0.728836	0.331	0.566	5.47785e-17	regulation of lipid metabolic process; negative regulation of transcription, DNA-templated; rhythmic process; multicellular organism development; circadian regulation of gene expression; positive regulation of transcription, DNA-templated; neuron differentiation; regulation of cell cycle; positive regulation of gene expression; circadian rhythm; negative regulation of gene expression; negative re…	protein dimerization activity; protein binding; DNA-binding transcription factor activity; DNA-binding transcription factor activity, RNA polymerase II-specific; transcription factor binding; ion channel binding; RNA polymerase II transcription factor binding	cytoplasm; nucleus; protein-containing complex; cytosol
OPCML	1.60243e-21	-0.48894	0.109	0.321	5.86507e-17	cell adhesion; neuron recognition	protein binding	membrane; plasma membrane; extracellular region; anchored component of membrane
TSPAN4	1.82732e-21	0.47746	0.368	0.2	6.68819e-17	protein-containing complex assembly	protein binding; integrin binding; antigen binding	membrane; integral component of membrane; plasma membrane; focal adhesion; integral component of plasma membrane; vesicle
H3F3B	1.86731e-21	0.280472	0.998	0.998	6.83456e-17	nucleosome assembly; cellular protein metabolic process; regulation of gene silencing by miRNA; osteoblast differentiation; nucleus organization; spermatogenesis; spermatid development; single fertilization; brain development; embryo implantation; cell population proliferation; male gonad development; response to hormone; pericentric heterochromatin assembly; telomeric heterochromatin assembly; m…	DNA binding; protein heterodimerization activity; protein binding; RNA polymerase II distal enhancer sequence-specific DNA binding; RNA polymerase II core promoter sequence-specific DNA binding; nucleosomal DNA binding	nucleus; nucleosome; chromosome; extracellular region; nucleoplasm; extracellular exosome; protein-containing complex; nuclear chromosome, telomeric region; Barr body; nuclear chromosome; nuclear nucleosome
DPYSL3	1.88664e-21	0.420744	0.891	0.839	6.90527e-17	actin filament bundle assembly; regulation of cell migration; regulation of neuron projection development; response to axon injury; positive regulation of filopodium assembly; protein homooligomerization; negative regulation of cell migration; positive regulation of neuron projection development; negative regulation of neuron projection development; cellular response to cytokine stimulus; actin c…	hydrolase activity; protein binding; hydrolase activity, acting on carbon-nitrogen (but not peptide) bonds; SH3 domain binding; chondroitin sulfate binding; hydrolase activity, acting on carbon-nitrogen (but not peptide) bonds, in cyclic amides; filamin binding	cytoplasm; extracellular space; cytosol; cell projection; lamellipodium; growth cone; filamentous actin; cell body; exocytic vesicle; synapse
MARCKS	2.60355e-21	0.353233	0.989	0.986	9.52925e-17	actin filament bundle assembly; protein homooligomerization; actin crosslink formation	actin binding; calmodulin binding; actin filament binding; protein kinase C binding; identical protein binding	cytoplasm; membrane; cytoskeleton; focal adhesion; plasma membrane; extracellular exosome; actin cytoskeleton; centrosome; cell cortex; actin filament bundle; germinal vesicle
CSRP2	3.02942e-21	-0.27188	0.69	0.911	1.1088e-16	multicellular organism development; cell differentiation; actin cytoskeleton organization	metal ion binding; protein binding	nucleus; focal adhesion; cytoplasm
ATP5F1E	3.03818e-21	0.29846	0.989	0.983	1.112e-16	ion transport; ATP synthesis coupled proton transport; ATP biosynthetic process; cristae formation; mitochondrial ATP synthesis coupled proton transport	hydrolase activity; protein binding; proton-transporting ATP synthase activity, rotational mechanism; ATPase activity; transmembrane transporter activity	membrane; mitochondrial inner membrane; mitochondrion; mitochondrial matrix; proton-transporting ATP synthase complex, catalytic core F(1); mitochondrial proton-transporting ATP synthase complex; mitochondrial proton-transporting ATP synthase complex, catalytic core F(1)
RPS10	3.25191e-21	-0.343202	0.929	0.966	1.19023e-16	translation; ribosomal small subunit assembly; viral transcription; translational initiation; nuclear-transcribed mRNA catabolic process, nonsense-mediated decay; SRP-dependent cotranslational protein targeting to membrane	RNA binding; structural constituent of ribosome; protein binding	nucleus; cytoplasm; membrane; cytosol; ribosome; cytosolic small ribosomal subunit; nucleolus; focal adhesion; nucleoplasm
HMGB1	3.72774e-21	-0.288657	0.976	0.994	1.36439e-16	positive regulation of blood vessel endothelial cell migration; positive regulation of vascular endothelial cell proliferation; cellular response to lipopolysaccharide; DNA repair; DNA recombination; cellular response to DNA damage stimulus; inflammatory response; autophagy; immune system process; innate immune response; chemotaxis; DNA geometric change; adaptive immune response; positive chemota…	RNA binding; DNA binding; lyase activity; protein binding; cytokine activity; transcription coactivator activity; four-way junction DNA binding; bubble DNA binding; DNA binding, bending; supercoiled DNA binding; transcription factor binding; double-stranded DNA binding; lipopolysaccharide binding; transcription regulatory region DNA binding; repressing transcription factor binding; phosphatidylse…	nucleus; cytoplasm; membrane; chromosome; extracellular space; plasma membrane; extracellular region; cell surface; endosome; nuclear chromatin; nucleoplasm; secretory granule lumen; ficolin-1-rich granule lumen; endoplasmic reticulum-Golgi intermediate compartment; transcriptional repressor complex; condensed chromosome; alphav-beta3 integrin-HMGB1 complex
THRA	3.88363e-21	-0.364285	0.718	0.88	1.42145e-16	regulation of transcription, DNA-templated; intracellular receptor signaling pathway; steroid hormone mediated signaling pathway; animal organ morphogenesis; cell differentiation; positive regulation of transcription by RNA polymerase II; negative regulation of transcription by RNA polymerase II; transcription by RNA polymerase II; hormone-mediated signaling pathway; multicellular organism develo…	zinc ion binding; DNA-binding transcription factor activity; sequence-specific DNA binding; metal ion binding; DNA binding; nuclear receptor activity; transcription regulatory region DNA binding; protein binding; steroid hormone receptor activity; DNA-binding transcription factor activity, RNA polymerase II-specific; RNA polymerase II regulatory region sequence-specific DNA binding; transcription…	nucleus; cytoplasm; cytosol; nuclear chromatin; nucleoplasm; RNA polymerase II transcription factor complex
FGFR1	3.90117e-21	0.324274	0.218	0.083	1.42787e-16	protein phosphorylation; phosphorylation; positive regulation of cell population proliferation; peptidyl-tyrosine phosphorylation; fibroblast growth factor receptor signaling pathway; positive regulation of blood vessel endothelial cell migration; positive regulation of vascular endothelial cell proliferation; phosphatidylinositol-mediated signaling; transmembrane receptor protein tyrosine kinase…	nucleotide binding; protein kinase activity; ATP binding; kinase activity; transferase activity; protein tyrosine kinase activity; transmembrane receptor protein tyrosine kinase activity; fibroblast growth factor-activated receptor activity; protein homodimerization activity; protein binding; identical protein binding; heparin binding; fibroblast growth factor binding; receptor-receptor interacti…	membrane; integral component of membrane; nucleus; cytoplasm; nucleolus; cytosol; plasma membrane; extracellular region; cytoplasmic vesicle; integral component of plasma membrane; receptor complex
TMEM123	4.98404e-21	0.420619	0.28	0.129	1.82421e-16	oncosis	protein binding; signaling receptor activity	membrane; integral component of membrane; cytoplasmic vesicle; external side of plasma membrane
EML1	6.89562e-21	-0.39241	0.241	0.483	2.52387e-16	microtubule cytoskeleton organization; mitotic spindle organization; neuroblast proliferation; brain development; hematopoietic progenitor cell differentiation	protein binding; calcium ion binding; microtubule binding; tubulin binding	cytoplasm; cytosol; cytoskeleton; perinuclear region of cytoplasm; microtubule; microtubule cytoskeleton; mitotic spindle; mitotic spindle pole; mitotic spindle midzone; microtubule associated complex
DAB1	1.01044e-20	-0.419158	0.186	0.421	3.6983e-16	multicellular organism development; cell differentiation; nervous system development; axon guidance; neuron migration; negative regulation of cell adhesion; small GTPase mediated signal transduction; brain development; midgut development; adult walking behavior; dendrite development; ventral spinal cord development; cerebellum structural organization; hippocampus development; cerebral cortex cell…	protein binding; phosphatidylinositol 3-kinase binding	intracellular membrane-bounded organelle; cytoplasm; cytosol; brush border; postsynaptic density; membrane; neuron projection; neuronal cell body; apical part of cell; perinuclear region of cytoplasm
VAMP2	1.14968e-20	-0.367898	0.979	0.981	4.20794e-16	vesicle-mediated transport; post-Golgi vesicle-mediated transport; membrane organization; glutamate secretion; neurotransmitter secretion; regulation of exocytosis; eosinophil degranulation; synaptic vesicle exocytosis; exocytosis; response to glucose; protein transport; calcium-ion regulated exocytosis; cellular response to insulin stimulus; Golgi to plasma membrane protein transport; long-term …	protein binding; syntaxin binding; calmodulin binding; protein self-association; SNARE binding; syntaxin-1 binding; phospholipid binding; calcium-dependent protein binding	membrane; integral component of membrane; plasma membrane; cell junction; cytoplasmic vesicle; synapse; clathrin-coated vesicle; cytosol; integral component of plasma membrane; SNARE complex; neuron projection; secretory granule membrane; vesicle; synaptic vesicle membrane; perinuclear region of cytoplasm; clathrin-coated vesicle membrane; trans-Golgi network; voltage-gated potassium channel comp…
ATP2B1	1.30437e-20	0.471566	0.718	0.588	4.77414e-16	ion transport; calcium ion transport; calcium ion transmembrane transport; regulation of presynaptic cytosolic calcium ion concentration; ion transmembrane transport; positive regulation of calcium ion transport; regulation of blood pressure; positive regulation of bone mineralization; regulation of cardiac conduction; cellular calcium ion homeostasis; negative regulation of cytokine production; …	metal ion binding; nucleotide binding; ATP binding; protein binding; calcium transmembrane transporter activity, phosphorylative mechanism; calmodulin binding; ATPase activity; PDZ domain binding; calcium ion transmembrane transporter activity; calcium-transporting ATPase activity involved in regulation of presynaptic cytosolic calcium ion concentration	membrane; integral component of membrane; nucleus; plasma membrane; cell junction; synapse; extracellular exosome; basolateral plasma membrane; integral component of plasma membrane; glutamatergic synapse; immunological synapse; GABA-ergic synapse; cytoplasmic side of plasma membrane; apical plasma membrane; dendrite membrane; dendritic spine membrane; neuronal cell body membrane; membrane raft; …
TRIM36	1.46254e-20	0.468496	0.44	0.274	5.35303e-16	regulation of cell cycle; regulation of microtubule cytoskeleton organization; protein polyubiquitination; mitotic cytokinesis; spindle organization; acrosome reaction; protein ubiquitination	zinc ion binding; metal ion binding; transferase activity; ubiquitin-protein transferase activity; protein binding; alpha-tubulin binding	cytoplasm; cytoskeleton; cytoplasmic vesicle; cytosol; acrosomal vesicle
MPPED2	1.46755e-20	0.417118	0.485	0.312	5.37137e-16		metal ion binding; nucleotide binding; hydrolase activity; protein binding; manganese ion binding; AMP binding; phosphoric diester hydrolase activity; GMP binding
MSI2	1.51931e-20	0.472746	0.532	0.374	5.56083e-16	stem cell development	nucleic acid binding; RNA binding; protein binding; single-stranded RNA binding; poly(U) RNA binding	cytoplasm; nucleus; ribonucleoprotein complex; polysome
HUNK	1.75972e-20	0.483833	0.331	0.17	6.44074e-16	protein phosphorylation; phosphorylation; intracellular signal transduction; signal transduction; multicellular organism development	nucleotide binding; protein kinase activity; protein serine/threonine kinase activity; ATP binding; kinase activity; transferase activity; protein binding	nucleus; cytoplasm
ADGRL2	2.55206e-20	0.325422	0.327	0.16	9.34079e-16	G protein-coupled receptor signaling pathway; signal transduction; cell surface receptor signaling pathway; adenylate cyclase-activating G protein-coupled receptor signaling pathway; brain development	G protein-coupled receptor activity; carbohydrate binding; transmembrane signaling receptor activity; latrotoxin receptor activity	membrane; integral component of membrane; integral component of plasma membrane; neuron projection
GUCY1A2	3.65888e-20	0.687954	0.556	0.411	1.33919e-15	intracellular signal transduction; cyclic nucleotide biosynthetic process; cGMP biosynthetic process; signal transduction; positive regulation of nitric oxide mediated signal transduction	nucleotide binding; lyase activity; GTP binding; protein binding; heme binding; phosphorus-oxygen lyase activity; guanylate cyclase activity	cytoplasm
RPL41	3.90721e-20	-0.231855	0.996	0.999	1.43008e-15	translation; cytoplasmic translation; viral transcription; translational initiation; nuclear-transcribed mRNA catabolic process, nonsense-mediated decay; SRP-dependent cotranslational protein targeting to membrane	structural constituent of ribosome; RNA binding; mRNA 3'-UTR binding; mRNA 5'-UTR binding	ribosome; cytosol; cytosolic large ribosomal subunit; polysomal ribosome
RPS25	5.01526e-20	-0.278099	0.994	0.995	1.83564e-15	translation; viral transcription; translational initiation; nuclear-transcribed mRNA catabolic process, nonsense-mediated decay; SRP-dependent cotranslational protein targeting to membrane	RNA binding; protein binding; structural constituent of ribosome	nucleus; ribosome; cytosolic small ribosomal subunit; nucleolus; nucleoplasm; cytosol; extracellular exosome; postsynaptic density; small ribosomal subunit
SATB2	8.41807e-20	-0.426606	0.015	0.18	3.0811e-15	chromatin organization; chromatin remodeling; multicellular organism development; negative regulation of transcription by RNA polymerase II; neuron migration; osteoblast development; embryonic pattern specification; regulation of gene expression; commitment of neuronal cell to specific neuron type in forebrain; positive regulation of transcription by RNA polymerase II; embryonic skeletal system m…	DNA binding; protein binding; RNA polymerase II regulatory region sequence-specific DNA binding; RNA polymerase II proximal promoter sequence-specific DNA binding; DNA-binding transcription activator activity, RNA polymerase II-specific; chromatin binding; sequence-specific DNA binding; DNA-binding transcription factor activity, RNA polymerase II-specific	nucleus; nucleoplasm; histone deacetylase complex; transcription factor complex; nuclear chromatin; nuclear matrix
GABBR2	9.1291e-20	-0.359964	0.126	0.344	3.34134e-15	G protein-coupled receptor signaling pathway; signal transduction; gamma-aminobutyric acid signaling pathway; chemical synaptic transmission; negative regulation of adenylate cyclase activity; neuron-glial cell signaling	G protein-coupled receptor activity; protein binding; G protein-coupled GABA receptor activity; protein heterodimerization activity	membrane; integral component of membrane; plasma membrane; cell junction; synapse; postsynaptic membrane; integral component of plasma membrane; cytoplasm; neuron projection; G protein-coupled receptor heterodimeric complex; GABA receptor complex
INHBA-AS1	1.04439e-19	-0.355928	0.128	0.341	3.82257e-15
PDGFC	1.1642e-19	-0.383196	0.222	0.465	4.26107e-15	positive regulation of cell population proliferation; platelet-derived growth factor receptor signaling pathway; positive regulation of fibroblast proliferation; multicellular organism development; positive regulation of ERK1 and ERK2 cascade; embryonic organ development; positive regulation of cell division; positive regulation of cold-induced thermogenesis; positive regulation of cell migration…	growth factor activity; protein binding; platelet-derived growth factor receptor binding; protein homodimerization activity	extracellular space; nucleus; cytoplasm; membrane; cytosol; plasma membrane; extracellular region; extracellular exosome; cell surface; endoplasmic reticulum lumen; Golgi membrane
SCN3A	1.22609e-19	0.5649	0.534	0.375	4.48761e-15	transmembrane transport; ion transport; regulation of ion transmembrane transport; sodium ion transport; neuronal action potential; membrane depolarization during action potential; sodium ion transmembrane transport; ion transmembrane transport	ion channel activity; voltage-gated ion channel activity; sodium channel activity; voltage-gated sodium channel activity; protein binding	membrane; integral component of membrane; plasma membrane; voltage-gated sodium channel complex; axon; cytoplasm
CRABP1	1.28967e-19	-0.73471	0.188	0.411	4.72033e-15	retinoic acid catabolic process; signal transduction; multicellular organism development	protein binding; lipid binding; retinoic acid binding; retinal binding; retinol binding; retinoid binding	cytoplasm; cytosol
TMSB15A	1.64001e-19	0.412285	0.904	0.842	6.00259e-15	actin filament organization; regulation of cell migration; sequestering of actin monomers	actin binding; actin monomer binding	cytoplasm; cytoskeleton
LNX1	1.65967e-19	0.423833	0.229	0.095	6.07456e-15	protein ubiquitination; ubiquitin-dependent protein catabolic process	metal ion binding; transferase activity; protein binding; ubiquitin-protein transferase activity; PDZ domain binding; identical protein binding	cytoplasm
RPS8	1.78279e-19	-0.249885	0.994	1	6.52517e-15	translation; maturation of SSU-rRNA from tricistronic rRNA transcript (SSU-rRNA, 5.8S rRNA, LSU-rRNA); viral transcription; translational initiation; nuclear-transcribed mRNA catabolic process, nonsense-mediated decay; SRP-dependent cotranslational protein targeting to membrane	RNA binding; structural constituent of ribosome; protein binding	nucleus; cytoplasm; membrane; endoplasmic reticulum; cytosol; ribosome; cytosolic small ribosomal subunit; focal adhesion; nucleoplasm; extracellular exosome; ribonucleoprotein complex; intracellular
PLXDC2	1.93124e-19	-0.577054	0.12	0.317	7.06852e-15		protein binding	membrane; integral component of membrane
EZR	2.84131e-19	0.496432	0.509	0.336	1.03995e-14	phosphatidylinositol-mediated signaling; negative regulation of transcription by RNA polymerase II; positive regulation of gene expression; filopodium assembly; regulation of cell shape; actin filament bundle assembly; axon guidance; establishment of endothelial barrier; cellular response to cAMP; positive regulation of protein secretion; negative regulation of ERK1 and ERK2 cascade; microvillus …	RNA binding; actin binding; protein binding; cytoskeletal protein binding; microtubule binding; identical protein binding; cadherin binding; actin filament binding; protein domain specific binding; S100 protein binding; protein kinase A catalytic subunit binding; protein kinase A regulatory subunit binding; protein kinase A binding; ATPase binding; cell adhesion molecule binding; protein C-termin…	apical part of cell; cytoplasm; membrane; fibrillar center; plasma membrane; extracellular space; cytosol; cytoskeleton; cell projection; perinuclear region of cytoplasm; focal adhesion; endosome; filopodium; extracellular exosome; cell periphery; cell cortex; ruffle membrane; basolateral plasma membrane; protein-containing complex; invadopodium; extrinsic component of membrane; microvillus; brus…
ROBO2	3.16772e-19	0.494063	0.521	0.346	1.15942e-14	ventricular septum morphogenesis; multicellular organism development; cell differentiation; chemotaxis; nervous system development; axon guidance; aorta development; brain development; homophilic cell adhesion via plasma membrane adhesion molecules; outflow tract septum morphogenesis; metanephros development; aortic valve morphogenesis; pulmonary valve morphogenesis; negative regulation of synaps…	protein binding; identical protein binding; axon guidance receptor activity	membrane; integral component of membrane; cell surface; plasma membrane; extracellular exosome; axolemma
MASP1	4.55712e-19	-0.323498	0.047	0.228	1.66795e-14	proteolysis; immune system process; innate immune response; receptor-mediated endocytosis; complement activation; complement activation, lectin pathway	metal ion binding; hydrolase activity; calcium ion binding; protein homodimerization activity; peptidase activity; serine-type endopeptidase activity; serine-type peptidase activity; protein binding; calcium-dependent protein binding	cytosol; nucleoplasm; extracellular space; extracellular region
GRIN2B	4.91533e-19	-0.486401	0.244	0.469	1.79906e-14	negative regulation of dendritic spine maintenance; ion transport; ionotropic glutamate receptor signaling pathway; MAPK cascade; modulation of chemical synaptic transmission; ephrin receptor signaling pathway; chemical synaptic transmission; synaptic transmission, glutamatergic; excitatory postsynaptic potential; brain development; calcium-mediated signaling; regulation of synaptic plasticity; l…	metal ion binding; ion channel activity; zinc ion binding; protein binding; signaling receptor activity; ionotropic glutamate receptor activity; ligand-gated ion channel activity; amyloid-beta binding; glutamate receptor activity; NMDA glutamate receptor activity; glutamate-gated calcium ion channel activity; transmitter-gated ion channel activity involved in regulation of postsynaptic membrane p…	cytoplasm; membrane; integral component of membrane; plasma membrane; cell junction; synapse; postsynaptic membrane; integral component of plasma membrane; postsynaptic density; cell surface; NMDA selective glutamate receptor complex; postsynaptic density membrane; neuron projection; synaptic membrane
NXPH4	6.42417e-19	0.368288	0.335	0.176	2.35131e-14	neuropeptide signaling pathway	signaling receptor binding	extracellular region
TMSB10	8.41606e-19	0.232726	1	1	3.08036e-14	actin filament organization; regulation of cell migration; sequestering of actin monomers	actin binding; protein binding; actin monomer binding	cytoplasm; cytoskeleton
CNTN2	8.62771e-19	0.413927	0.252	0.115	3.15783e-14	nervous system development; cell adhesion; neuron projection development; axon guidance; homophilic cell adhesion via plasma membrane adhesion molecules; dendrite self-avoidance; clustering of voltage-gated potassium channels; protein localization to juxtaparanode region of axon; presynaptic membrane organization; microtubule cytoskeleton organization; neuron migration; axonal fasciculation; lear…	identical protein binding; cell-cell adhesion mediator activity; protein binding; carbohydrate binding; protein self-association	membrane; plasma membrane; anchored component of membrane; axon; synapse; node of Ranvier; juxtaparanode region of axon; myelin sheath; anchored component of postsynaptic membrane; cell surface; neuron projection; neuronal cell body
SUMO2	9.64671e-19	0.278724	0.989	0.978	3.53079e-14	protein sumoylation; positive regulation of proteasomal ubiquitin-dependent protein catabolic process	RNA binding; protein binding; ubiquitin protein ligase binding; transcription corepressor binding	nucleus; nucleoplasm; PML body
H3F3A	1.17762e-18	0.241118	0.998	0.999	4.31022e-14	nucleosome assembly; cellular protein metabolic process; regulation of gene silencing by miRNA; positive regulation of cell growth; regulation of megakaryocyte differentiation; DNA replication-independent nucleosome assembly; blood coagulation; chromatin silencing at rDNA; negative regulation of gene expression, epigenetic; telomere organization; osteoblast differentiation; nucleus organization; …	DNA binding; protein heterodimerization activity; protein binding; RNA polymerase II distal enhancer sequence-specific DNA binding; RNA polymerase II core promoter sequence-specific DNA binding; nucleosomal DNA binding	nucleus; nucleosome; chromosome; extracellular region; nucleoplasm; extracellular exosome; protein-containing complex; nuclear chromosome, telomeric region; nuclear chromosome; nuclear nucleosome; Barr body
RPS21	1.31201e-18	-0.312773	0.985	0.994	4.80208e-14	translation; cytoplasmic translation; viral transcription; translational initiation; nuclear-transcribed mRNA catabolic process, nonsense-mediated decay; SRP-dependent cotranslational protein targeting to membrane; endonucleolytic cleavage in ITS1 to separate SSU-rRNA from 5.8S rRNA and LSU-rRNA from tricistronic rRNA transcript (SSU-rRNA, 5.8S rRNA, LSU-rRNA); endonucleolytic cleavage to generat…	RNA binding; structural constituent of ribosome; protein N-terminus binding; protein binding	cytoplasm; endoplasmic reticulum; ribosome; cytosol; cytosolic small ribosomal subunit; nucleoplasm; rough endoplasmic reticulum; small ribosomal subunit; polysomal ribosome; synapse; intracellular
SNAP25	2.09183e-18	0.699453	0.776	0.682	7.6563e-14	potassium ion transmembrane transport; exocytosis; chemical synaptic transmission; neutrophil degranulation; vesicle fusion; synaptic vesicle priming; synaptic vesicle fusion to presynaptic active zone membrane; regulation of insulin secretion; glutamate secretion; neurotransmitter secretion; synaptic vesicle docking; synaptic vesicle exocytosis; neurotransmitter uptake; locomotory behavior; asso…	voltage-gated potassium channel activity; protein binding; SNARE binding; syntaxin-1 binding; SNAP receptor activity; syntaxin binding; calcium-dependent protein binding	cytoplasm; membrane; plasma membrane; perinuclear region of cytoplasm; cell junction; synapse; cytosol; specific granule membrane; tertiary granule membrane; SNARE complex; neuron projection; vesicle; cytoskeleton; voltage-gated potassium channel complex; BLOC-1 complex; trans-Golgi network; synaptic vesicle; axon; growth cone; extrinsic component of cytoplasmic side of plasma membrane; somatoden…
RND2	2.21044e-18	0.289555	0.197	0.076	8.09042e-14	small GTPase mediated signal transduction; regulation of cell migration; Rho protein signal transduction; regulation of cell shape; actin filament bundle assembly; signal transduction; actin filament organization; establishment or maintenance of actin cytoskeleton polarity; regulation of actin cytoskeleton organization; positive regulation of collateral sprouting	nucleotide binding; GTPase activity; GTP binding; protein binding; protein kinase binding; protein N-terminus binding	membrane; cytoplasmic vesicle; cytoplasm; intracellular membrane-bounded organelle; plasma membrane; cell cortex; cell division site; acrosomal membrane; early endosome; intracellular
TET1	2.37768e-18	0.457221	0.389	0.233	8.70254e-14	oxidation-reduction process; chromatin organization; 5-methylcytosine catabolic process; DNA demethylation; oxidative demethylation; positive regulation of transcription by RNA polymerase II; positive regulation of cell population proliferation; protein O-linked glycosylation; stem cell population maintenance; negative regulation of methylation-dependent chromatin silencing; inner cell mass cell …	zinc ion binding; metal ion binding; oxidoreductase activity; DNA binding; dioxygenase activity; iron ion binding; methylcytosine dioxygenase activity	nucleus
IL17RA	2.70809e-18	0.204526	0.135	0.04	9.91187e-14	cell surface receptor signaling pathway; positive regulation of interleukin-23 production; fibroblast activation; interleukin-17-mediated signaling pathway; positive regulation of inflammatory response; defense response to fungus; cellular response to cytokine stimulus; granulocyte chemotaxis; positive regulation of cytokine production involved in inflammatory response; positive regulation of int…	protein binding; interleukin-17 receptor activity; signaling receptor binding	membrane; integral component of membrane; plasma membrane; extracellular region; integral component of plasma membrane
RPL36A	3.21684e-18	-0.278059	0.998	0.996	1.17739e-13	translation; cytoplasmic translation; viral transcription; translational initiation; nuclear-transcribed mRNA catabolic process, nonsense-mediated decay; SRP-dependent cotranslational protein targeting to membrane	structural constituent of ribosome; RNA binding; protein binding	endoplasmic reticulum; cytosol; ribosome; plasma membrane; intracellular; cytoplasm; cytosolic large ribosomal subunit; polysomal ribosome
AC027031.2	4.22631e-18	-0.355758	0.113	0.309	1.54687e-13
ACTB	5.33799e-18	0.305115	0.989	0.997	1.95376e-13	Fc-gamma receptor signaling pathway involved in phagocytosis; retina homeostasis; protein deubiquitination; substantia nigra development; positive regulation of gene expression, epigenetic; platelet aggregation; membrane organization; ephrin receptor signaling pathway; synaptic vesicle endocytosis; cell motility; postsynaptic actin cytoskeleton organization; ATP-dependent chromatin remodeling; ax…	nucleotide binding; ATP binding; protein binding; identical protein binding; structural constituent of cytoskeleton; protein kinase binding; RNA polymerase II distal enhancer sequence-specific DNA binding; tau protein binding; RNA polymerase II proximal promoter sequence-specific DNA binding; kinesin binding; nucleosomal DNA binding; nitric-oxide synthase binding; Tat protein binding; structural …	cytoplasm; nucleus; membrane; plasma membrane; nuclear chromatin; extracellular space; cytoskeleton; focal adhesion; synapse; nucleoplasm; cytosol; extracellular exosome; blood microparticle; actin filament; protein-containing complex; ribonucleoprotein complex; axon; vesicle; glutamatergic synapse; cytoplasmic ribonucleoprotein granule; actin cytoskeleton; NuA4 histone acetyltransferase complex;…
CAMKV	5.47746e-18	-0.336684	0.265	0.503	2.00481e-13	protein phosphorylation; phosphorylation; regulation of modification of postsynaptic structure	protein kinase activity; ATP binding; calmodulin binding; calmodulin-dependent protein kinase activity; kinase activity	membrane; plasma membrane; cytoplasmic vesicle; cytoplasmic vesicle membrane; glutamatergic synapse
FAM49A	6.57415e-18	-0.395023	0.453	0.665	2.4062e-13			intracellular
ALDH2	9.98348e-18	0.405597	0.547	0.399	3.65405e-13	oxidation-reduction process; electron transport chain; carbohydrate metabolic process; ethanol oxidation; alcohol metabolic process; ethanol catabolic process	oxidoreductase activity; oxidoreductase activity, acting on the aldehyde or oxo group of donors, NAD or NADP as acceptor; aldehyde dehydrogenase (NAD) activity; electron transfer activity; NAD binding; aldehyde dehydrogenase [NAD(P)+] activity; glyceraldehyde-3-phosphate dehydrogenase (NAD+) (non-phosphorylating) activity	mitochondrion; mitochondrial matrix; extracellular exosome
SSBP3	1.02969e-17	-0.395218	0.466	0.681	3.76879e-13	positive regulation of transcription by RNA polymerase II; hematopoietic progenitor cell differentiation; positive regulation of cell population proliferation; prechordal plate formation; midbrain-hindbrain boundary initiation; positive regulation of transcription, DNA-templated; mesendoderm development; head development; head morphogenesis; protein-containing complex assembly; positive regulatio…	DNA binding; protein binding; single-stranded DNA binding	nucleus; transcription factor complex; protein-containing complex
YWHAQ	1.18384e-17	0.297714	0.957	0.954	4.33298e-13	substantia nigra development; membrane organization; negative regulation of transcription, DNA-templated; positive regulation of protein insertion into mitochondrial membrane involved in apoptotic signaling pathway; protein targeting; small GTPase mediated signal transduction; negative regulation of ion transmembrane transport	protein domain specific binding; protein binding; identical protein binding; protein N-terminus binding; protein C-terminus binding; ion channel binding; 14-3-3 protein binding	cytoplasm; mitochondrion; membrane; focal adhesion; cytosol; extracellular exosome; protein-containing complex; synapse
SATB2-AS1	1.48435e-17	-0.447104	0.009	0.152	5.43286e-13
SEZ6L2	1.57162e-17	-0.350144	0.761	0.888	5.75229e-13	adult locomotory behavior; cerebellar Purkinje cell layer development; synapse maturation; regulation of protein kinase C signaling		membrane; integral component of membrane; endoplasmic reticulum; endoplasmic reticulum membrane; plasma membrane; neuronal cell body
GAS7	1.63219e-17	-0.266689	0.081	0.269	5.97398e-13	multicellular organism development; regulation of transcription, DNA-templated; cell differentiation; nervous system development; neuron differentiation; neuron projection morphogenesis; cell cycle arrest	protein binding; DNA-binding transcription factor activity; cytoskeletal protein binding	cytoplasm; plasma membrane; cytoskeleton
PPP3CA	1.77573e-17	-0.557358	0.521	0.707	6.49934e-13	positive regulation of transcription by RNA polymerase II; positive regulation of cell migration; Fc-epsilon receptor signaling pathway; dephosphorylation; protein dephosphorylation; T cell activation; cellular response to drug; skeletal muscle tissue regeneration; Wnt signaling pathway, calcium modulating pathway; response to calcium ion; calcineurin-NFAT signaling cascade; calcineurin-mediated …	metal ion binding; hydrolase activity; phosphoprotein phosphatase activity; protein binding; calcium ion binding; calmodulin binding; enzyme binding; drug binding; protein serine/threonine phosphatase activity; cyclosporin A binding; protein dimerization activity; calmodulin-dependent protein phosphatase activity; calcium-dependent protein serine/threonine phosphatase activity; protein heterodime…	cytoplasm; membrane; cytosol; nucleoplasm; plasma membrane; cell projection; sarcolemma; dendritic spine; Z disc; cytoplasmic side of plasma membrane; calcineurin complex; postsynapse; nucleus; mitochondrion; slit diaphragm; synapse; Schaffer collateral - CA1 synapse; glutamatergic synapse
FEZF2	1.78935e-17	-0.571875	0.312	0.524	6.5492e-13	multicellular organism development; cell differentiation; positive regulation of transcription by RNA polymerase II; nervous system development; positive regulation of transcription, DNA-templated; negative regulation of transcription by RNA polymerase II; axonal fasciculation; locomotory behavior; negative regulation of cell population proliferation; dendrite development; telencephalon developme…	nucleic acid binding; metal ion binding; DNA binding; DNA-binding transcription factor activity; sequence-specific DNA binding; RNA polymerase II regulatory region sequence-specific DNA binding; chromatin DNA binding; RNA polymerase II proximal promoter sequence-specific DNA binding; DNA-binding transcription repressor activity, RNA polymerase II-specific; DNA-binding transcription activator acti…	nucleus
EPHA7	1.79683e-17	-0.315249	0.169	0.383	6.57658e-13	protein phosphorylation; phosphorylation; transmembrane receptor protein tyrosine kinase signaling pathway; peptidyl-tyrosine phosphorylation; apoptotic process; multicellular organism development; nervous system development; axon guidance; ephrin receptor signaling pathway; brain development; positive regulation of neuron apoptotic process; negative chemotaxis; regulation of ERK1 and ERK2 cascad…	nucleotide binding; protein kinase activity; ATP binding; kinase activity; transferase activity; protein tyrosine kinase activity; transmembrane receptor protein tyrosine kinase activity; ephrin receptor activity; protein binding; chemorepellent activity; transmembrane-ephrin receptor activity; GPI-linked ephrin receptor activity; axon guidance receptor activity; ephrin receptor binding	membrane; integral component of membrane; integral component of plasma membrane; plasma membrane; receptor complex; neuron projection; dendrite; neuromuscular junction; neuronal cell body; postsynaptic membrane; Schaffer collateral - CA1 synapse; hippocampal mossy fiber to CA3 synapse; glutamatergic synapse; integral component of postsynaptic specialization membrane; integral component of postsyn…
LRRTM4	1.79909e-17	-0.335962	0.081	0.262	6.58485e-13	synapse organization	protein binding	membrane; integral component of membrane; glutamatergic synapse; integral component of postsynaptic density membrane; plasma membrane; cell junction; synapse; postsynaptic membrane; extracellular space; extracellular matrix
SCN2A	1.86405e-17	-0.392669	0.222	0.441	6.82261e-13	transmembrane transport; ion transport; ion transmembrane transport; regulation of ion transmembrane transport; sodium ion transport; nervous system development; memory; sodium ion transmembrane transport; neuron apoptotic process; cellular response to hypoxia; neuronal action potential; membrane depolarization during action potential; myelination; intrinsic apoptotic signaling pathway in respons…	ion channel activity; voltage-gated ion channel activity; sodium channel activity; voltage-gated sodium channel activity; protein binding	membrane; integral component of membrane; plasma membrane; voltage-gated sodium channel complex; axon; integral component of plasma membrane; intrinsic component of plasma membrane; node of Ranvier; sodium channel complex; intercalated disc; T-tubule; paranode region of axon; glutamatergic synapse; integral component of presynaptic membrane
RPLP0	2.00798e-17	-0.251587	0.987	0.995	7.3494e-13	translation; cytoplasmic translation; ribosome biogenesis; ribosomal large subunit assembly; viral transcription; interleukin-12-mediated signaling pathway; translational initiation; nuclear-transcribed mRNA catabolic process, nonsense-mediated decay; SRP-dependent cotranslational protein targeting to membrane	RNA binding; protein binding; structural constituent of ribosome; large ribosomal subunit rRNA binding	nucleus; cytoplasm; membrane; endoplasmic reticulum; cytosol; ribosome; focal adhesion; cytosolic large ribosomal subunit; extracellular exosome; ribonucleoprotein complex; cytoplasmic ribonucleoprotein granule; postsynaptic density; postsynapse; intracellular
SRI	2.03258e-17	0.449375	0.662	0.557	7.43945e-13	negative regulation of heart rate; regulation of release of sequestered calcium ion into cytosol by sarcoplasmic reticulum; signal transduction; muscle organ development; regulation of cell communication by electrical coupling; negative regulation of ryanodine-sensitive calcium-release channel activity; heart development; regulation of high voltage-gated calcium channel activity; regulation of he…	metal ion binding; calcium ion binding; protein binding; protein heterodimerization activity; ion channel binding; signaling receptor binding; protease binding; calcium channel regulator activity; repressing transcription factor binding	cytoplasm; membrane; cytosol; nucleoplasm; extracellular exosome; sarcoplasmic reticulum; endoplasmic reticulum membrane; sarcoplasmic reticulum membrane; Z disc; T-tubule; chromaffin granule membrane; mitochondrion; smooth endoplasmic reticulum; plasma membrane; axon; vesicle; axon terminus; dendritic spine neck
EEF1B2	2.11189e-17	-0.365371	0.927	0.96	7.72973e-13	translation; translational elongation	protein binding; translation elongation factor activity; guanyl-nucleotide exchange factor activity	cytoplasm; endoplasmic reticulum; eukaryotic translation elongation factor 1 complex; cytosol
PTMA	2.34338e-17	0.233106	1	0.999	8.577e-13	negative regulation of apoptotic process; transcription, DNA-templated; histone exchange	protein binding; activating transcription factor binding; histone binding	cytosol; nucleoplasm; nucleus
GRIA3	3.00174e-17	-0.351738	0.248	0.468	1.09867e-12	ion transport; ion transmembrane transport; ionotropic glutamate receptor signaling pathway; regulation of postsynaptic membrane potential; modulation of chemical synaptic transmission; synaptic transmission, glutamatergic; glutamate receptor signaling pathway; regulation of NMDA receptor activity	ion channel activity; signaling receptor activity; ionotropic glutamate receptor activity; ligand-gated ion channel activity; amyloid-beta binding; glutamate receptor activity; transmitter-gated ion channel activity involved in regulation of postsynaptic membrane potential; AMPA glutamate receptor activity	membrane; integral component of membrane; plasma membrane; cell junction; synapse; postsynaptic membrane; AMPA glutamate receptor complex; endocytic vesicle membrane; postsynaptic density membrane; parallel fiber to Purkinje cell synapse
ABRACL	3.03185e-17	-0.375628	0.729	0.872	1.10969e-12	regulation of actin filament-based process
MAPK10	4.95729e-17	0.481754	0.643	0.531	1.81442e-12	protein phosphorylation; phosphorylation; MAPK cascade; rhythmic process; Fc-epsilon receptor signaling pathway; intracellular signal transduction; regulation of gene expression; activation of MAPK activity; signal transduction; regulation of circadian rhythm; JNK cascade; regulation of DNA-binding transcription factor activity; response to light stimulus; negative regulation of transcription by …	nucleotide binding; protein kinase activity; protein serine/threonine kinase activity; ATP binding; kinase activity; transferase activity; MAP kinase activity; protein binding; JUN kinase activity; MAP kinase kinase activity	nucleus; cytoplasm; membrane; mitochondrion; plasma membrane; nucleoplasm; cytosol; neuron projection; perikaryon; glutamatergic synapse
ACTG1	5.5155e-17	0.297747	0.998	1	2.01873e-12	Fc-gamma receptor signaling pathway involved in phagocytosis; retina homeostasis; platelet aggregation; membrane organization; ephrin receptor signaling pathway; synaptic vesicle endocytosis; cell junction assembly; postsynaptic actin cytoskeleton organization; sarcomere organization; cellular response to interferon-gamma	nucleotide binding; ATP binding; protein binding; identical protein binding; structural constituent of cytoskeleton; ubiquitin protein ligase binding; profilin binding; structural constituent of postsynaptic actin cytoskeleton	nucleus; cytoplasm; membrane; plasma membrane; extracellular space; cytoskeleton; cytosol; extracellular exosome; blood microparticle; actin filament; dense body; focal adhesion; actin cytoskeleton; myofibril; filamentous actin; calyx of Held; phagocytic vesicle; Schaffer collateral - CA1 synapse
SYT13	7.66368e-17	-0.315241	0.15	0.354	2.80498e-12	vesicle-mediated transport; regulation of dopamine secretion; calcium-ion regulated exocytosis; regulation of calcium ion-dependent exocytosis; cellular response to calcium ion	calcium ion binding; calcium-dependent phospholipid binding; SNARE binding; clathrin binding; phosphatidylserine binding	membrane; integral component of membrane; intracellular membrane-bounded organelle; plasma membrane; neuron projection; axon; exocytic vesicle; transport vesicle; integral component of plasma membrane
KCNG1	9.73224e-17	-0.262416	0.043	0.203	3.5621e-12	transmembrane transport; ion transport; potassium ion transport; regulation of ion transmembrane transport; protein homooligomerization; potassium ion transmembrane transport; regulation of delayed rectifier potassium channel activity	ion channel activity; voltage-gated ion channel activity; voltage-gated potassium channel activity; potassium channel activity; delayed rectifier potassium channel activity; protein binding	membrane; integral component of membrane; voltage-gated potassium channel complex; plasma membrane
GNG5	1.00991e-16	0.484072	0.556	0.411	3.69637e-12	G protein-coupled receptor signaling pathway; signal transduction	GTPase activity; protein binding; G-protein beta-subunit binding; PDZ domain binding	membrane; plasma membrane; heterotrimeric G-protein complex; G-protein beta/gamma-subunit complex; extracellular exosome
HSP90AB1	1.01723e-16	-0.221049	0.991	0.999	3.72315e-12	positive regulation of protein kinase B signaling; positive regulation of tau-protein kinase activity; protein folding; Fc-gamma receptor signaling pathway involved in phagocytosis; cellular response to heat; response to unfolded protein; negative regulation of cell cycle arrest; regulation of cellular response to heat; xenobiotic metabolic process; neutrophil degranulation; negative regulation o…	RNA binding; nucleotide binding; ATP binding; protein binding; unfolded protein binding; identical protein binding; cadherin binding; TPR domain binding; tau protein binding; histone methyltransferase binding; peptide binding; histone deacetylase binding; kinase binding; double-stranded RNA binding; protein homodimerization activity; protein dimerization activity; heat shock protein binding; diso…	neuronal cell body; nucleus; cytoplasm; membrane; cytosol; mitochondrion; plasma membrane; extracellular region; melanosome; cell surface; nucleoplasm; extracellular exosome; COP9 signalosome; protein-containing complex; secretory granule lumen; ficolin-1-rich granule lumen; perinuclear region of cytoplasm; axonal growth cone; dendritic growth cone; aryl hydrocarbon receptor complex; HSP90-CDC37 …
GRK3	1.04599e-16	-0.338421	0.231	0.444	3.82842e-12	protein phosphorylation; phosphorylation; signal transduction; G protein-coupled receptor signaling pathway; receptor internalization	nucleotide binding; protein kinase activity; protein serine/threonine kinase activity; ATP binding; kinase activity; transferase activity; protein binding; G protein-coupled receptor kinase activity; beta-adrenergic receptor kinase activity	plasma membrane; cytosol
CHD7	1.15231e-16	0.427977	0.635	0.497	4.21756e-12	chromatin organization; DNA duplex unwinding; rRNA processing; secondary palate development; heart morphogenesis; regulation of transcription, DNA-templated; skeletal system development; in utero embryonic development; retina development in camera-type eye; cranial nerve development; genitalia development; face development; T cell differentiation; limb development; cognition; central nervous syst…	nucleotide binding; ATP binding; hydrolase activity; DNA binding; protein binding; DNA helicase activity; helicase activity; hydrolase activity, acting on acid anhydrides; chromatin binding; RNA polymerase II proximal promoter sequence-specific DNA binding; promoter-specific chromatin binding	nucleus; nucleolus; nucleoplasm
SMARCA5	1.30187e-16	0.410814	0.814	0.743	4.76496e-12	chromatin organization; nucleosome assembly; ATP-dependent chromatin remodeling; chromatin remodeling; positive regulation of transcription by RNA polymerase II; CENP-A containing nucleosome assembly; positive regulation of gene expression, epigenetic; DNA-templated transcription, initiation; regulation of transcription by RNA polymerase II; chromatin silencing at rDNA; chromatin assembly or disa…	nucleic acid binding; nucleotide binding; ATP binding; hydrolase activity; DNA binding; protein binding; ATPase activity; helicase activity; hydrolase activity, acting on acid anhydrides, in phosphorus-containing anhydrides; nucleosome binding; histone binding; DNA-dependent ATPase activity	nucleus; fibrillar center; NURF complex; nucleoplasm; nuclear replication fork; condensed chromosome; chromatin silencing complex; ISWI-type complex; RSF complex
GAREM1	1.30823e-16	-0.320744	0.25	0.48	4.78826e-12	positive regulation of cell division; positive regulation of ERK1 and ERK2 cascade; positive regulation of cell population proliferation; epidermal growth factor receptor signaling pathway; cellular response to epidermal growth factor stimulus	protein binding; proline-rich region binding	plasma membrane
SEZ6L	1.50917e-16	-0.248065	0.026	0.174	5.52371e-12	adult locomotory behavior; cerebellar Purkinje cell layer development; synapse maturation; regulation of protein kinase C signaling		membrane; integral component of membrane; endoplasmic reticulum; endoplasmic reticulum membrane; neuronal cell body
AKAP7	1.6715e-16	0.398494	0.308	0.161	6.11787e-12	regulation of protein kinase A signaling; modulation of chemical synaptic transmission; phosphorylation; protein localization; intracellular signal transduction; regulation of membrane repolarization; action potential; ion transport; cellular response to cAMP; positive regulation of potassium ion transmembrane transport; positive regulation of delayed rectifier potassium channel activity	nucleotide binding; protein binding; protein kinase A binding; protein kinase A regulatory subunit binding; protein kinase binding; kinase activity	nucleus; cytoplasm; cytosol; protein-containing complex; hippocampal mossy fiber to CA3 synapse; membrane; plasma membrane; apical plasma membrane; lateral plasma membrane
CHN2	1.82289e-16	0.171038	0.113	0.032	6.67195e-12	intracellular signal transduction; signal transduction; positive regulation of signal transduction; positive regulation of GTPase activity; regulation of small GTPase mediated signal transduction; regulation of GTPase activity	metal ion binding; GTPase activator activity; protein binding; SH3/SH2 adaptor activity	membrane; cytosol
NAV2	1.94533e-16	-0.341047	0.092	0.269	7.12008e-12	DNA duplex unwinding; neurogenesis; nervous system development; regulation of systemic arterial blood pressure by baroreceptor feedback; sensory perception of sound; sensory perception of smell; locomotory behavior; optic nerve development; glossopharyngeal nerve development; vagus nerve development	nucleotide binding; ATP binding; hydrolase activity; protein binding; DNA helicase activity; helicase activity; heparin binding	nucleus; nucleoplasm; interstitial matrix; extracellular matrix
GNG8	2.02302e-16	0.227129	0.132	0.042	7.40447e-12	G protein-coupled receptor signaling pathway; signal transduction; nervous system development; social behavior; nose development; cellular response to pheromone	GTPase activity; protein binding; G-protein beta-subunit binding	membrane; plasma membrane; heterotrimeric G-protein complex; G-protein beta/gamma-subunit complex
ZFAND6	2.40618e-16	0.467238	0.776	0.707	8.80684e-12	protein transport; negative regulation of apoptotic process; apoptotic process; cellular response to tumor necrosis factor; protein targeting to peroxisome; regulation of I-kappaB kinase/NF-kappaB signaling	zinc ion binding; metal ion binding; DNA binding; protein binding; polyubiquitin modification-dependent protein binding	cytoplasm; cytosol
DST	3.17164e-16	0.404647	0.726	0.611	1.16085e-11	cell adhesion; integrin-mediated signaling pathway; cytoskeleton organization; cytoplasmic microtubule organization; wound healing; intermediate filament cytoskeleton organization; response to wounding; cell motility; retrograde axonal transport; maintenance of cell polarity; hemidesmosome assembly	metal ion binding; calcium ion binding; actin binding; protein binding; cytoskeletal protein binding; microtubule binding; protein C-terminus binding; integrin binding; microtubule plus-end binding	nucleus; cytoplasm; membrane; integral component of membrane; cytosol; endoplasmic reticulum; endoplasmic reticulum membrane; axon cytoplasm; plasma membrane; microtubule cytoskeleton; cytoskeleton; cell projection; intermediate filament; cell junction; microtubule; focal adhesion; axon; cell leading edge; cell cortex; Z disc; basal plasma membrane; nuclear envelope; cytoplasmic vesicle; basement…
IGSF21	3.17362e-16	0.4424	0.442	0.293	1.16158e-11	homophilic cell adhesion via plasma membrane adhesion molecules; heterophilic cell-cell adhesion via plasma membrane cell adhesion molecules; synapse maturation	signaling receptor activity; protein homodimerization activity; cell adhesion molecule binding	membrane; plasma membrane; cell junction; synapse; postsynaptic membrane; anchored component of membrane; cell-cell adherens junction; presynaptic membrane; anchored component of external side of plasma membrane; inhibitory synapse
TSPO	3.34752e-16	-0.343155	0.115	0.3	1.22523e-11	lipid transport; protein targeting to mitochondrion; C21-steroid hormone biosynthetic process; regulation of cell population proliferation; heme biosynthetic process; anion transport; steroid metabolic process; regulation of cholesterol transport; steroid biosynthetic process; ion transport; chloride transport; aging; glial cell migration; response to manganese ion; response to vitamin B1; negati…	protein binding; cholesterol binding; benzodiazepine receptor activity; androgen binding; ion channel binding	membrane; integral component of membrane; mitochondrion; endoplasmic reticulum; mitochondrial membrane; extracellular exosome; mitochondrial outer membrane
PTN	5.02579e-16	-0.545243	0.504	0.682	1.83949e-11	signal transduction; negative regulation of phosphoprotein phosphatase activity; ossification; liver development; leukocyte chemotaxis involved in inflammatory response; positive regulation of leukocyte chemotaxis; negative regulation of neuroblast proliferation; brain development; heart development; learning; memory; regulation of cell shape; positive regulation of cell-substrate adhesion; posit…	growth factor activity; protein phosphatase inhibitor activity; glycosaminoglycan binding; heparin binding; chondroitin sulfate proteoglycan binding; vascular endothelial growth factor binding; proteoglycan binding; syndecan binding; heparan sulfate binding; protein binding; protein kinase binding; integrin binding; chondroitin sulfate binding	extracellular space; extracellular region; basement membrane; cytoplasm; cell surface; membrane; neuromuscular junction; perinuclear region of cytoplasm; presynapse; postsynapse; plasma membrane; endoplasmic reticulum; protein-containing complex
TLE2	6.16061e-16	-0.22317	0.038	0.193	2.25484e-11	regulation of transcription, DNA-templated; Wnt signaling pathway; negative regulation of canonical Wnt signaling pathway; signal transduction; negative regulation of transcription, DNA-templated; beta-catenin-TCF complex assembly; animal organ morphogenesis	protein binding; transcription corepressor activity; repressing transcription factor binding	nucleus; focal adhesion; extracellular space; nuclear body; transcription factor complex; nucleoplasm
FOXP1	6.34749e-16	-0.359729	0.224	0.428	2.32324e-11	negative regulation of gene expression; positive regulation of B cell receptor signaling pathway; cellular response to DNA damage stimulus; regulation of transcription, DNA-templated; regulation of transcription by RNA polymerase II; response to lipopolysaccharide; macrophage activation; negative regulation of transcription, DNA-templated; positive regulation of endothelial cell migration; endoth…	metal ion binding; DNA binding; DNA-binding transcription factor activity; sequence-specific DNA binding; protein binding; identical protein binding; DNA-binding transcription factor activity, RNA polymerase II-specific; protein self-association; androgen receptor binding	nucleus; nucleoplasm; nuclear chromatin
RHOBTB1	7.88244e-16	0.224023	0.162	0.061	2.88505e-11	small GTPase mediated signal transduction; regulation of cell migration; regulation of small GTPase mediated signal transduction; Rho protein signal transduction; regulation of cell shape; actin filament bundle assembly; actin filament organization; establishment or maintenance of actin cytoskeleton polarity; regulation of actin cytoskeleton organization	nucleotide binding; GTPase activity; GTP binding; protein kinase binding; protein binding	plasma membrane; cytoplasm; intracellular membrane-bounded organelle; cytosol; cell cortex; cell division site; intracellular
RTN4	8.89441e-16	0.239441	0.998	0.998	3.25544e-11	apoptotic process; nervous system development; regulation of apoptotic process; protein localization to lysosome; endoplasmic reticulum tubular network organization; endoplasmic reticulum tubular network formation; protein stabilization; negative regulation of axonogenesis; positive regulation of toll-like receptor 9 signaling pathway; negative regulation of axon extension; axonal fasciculation; …	RNA binding; protein binding; cadherin binding; ubiquitin protein ligase binding	membrane; integral component of membrane; endoplasmic reticulum; endoplasmic reticulum membrane; plasma membrane; cell junction; integral component of endoplasmic reticulum membrane; nuclear envelope; endoplasmic reticulum tubular network membrane; endoplasmic reticulum tubular network; postsynaptic density; cell projection; neuronal cell body
CFAP298	9.30833e-16	0.605709	0.632	0.567	3.40694e-11	regulation of cilium movement; cilium assembly	protein binding	nucleus; cytoplasm; cytosol; cytoskeleton; cell projection; cilium
SIAH3	1.11699e-15	-0.259281	0.026	0.17	4.08831e-11	protein ubiquitination; multicellular organism development; ubiquitin-dependent protein catabolic process; proteasome-mediated ubiquitin-dependent protein catabolic process; regulation of protein stability; negative regulation of protein targeting to mitochondrion	metal ion binding; ubiquitin protein ligase activity; ubiquitin conjugating enzyme binding; protein binding	nucleus; mitochondrion
CASC15	1.13662e-15	0.363831	0.325	0.181	4.16013e-11
BRINP1	1.51255e-15	-0.239018	0.024	0.163	5.53607e-11	cell cycle; positive regulation of neuron differentiation; negative regulation of mitotic cell cycle; cell cycle arrest; negative regulation of cell cycle; cell death; behavioral fear response; short-term memory; social behavior; exploration behavior; maternal behavior; negative regulation of neurogenesis; cellular response to retinoic acid; vocalization behavior	protein binding	cytoplasm; endoplasmic reticulum; neuronal cell body; dendrite
THY1	2.15632e-15	-0.328335	0.265	0.477	7.89234e-11	cell adhesion; integrin-mediated signaling pathway; regulation of cell migration; positive regulation of GTPase activity; cytoskeleton organization; positive regulation of T cell activation; angiogenesis; negative regulation of protein kinase activity; cell-cell signaling; negative regulation of cell migration; receptor clustering; retinal cone cell development; protein autophosphorylation; focal…	GTPase activator activity; integrin binding; protein binding; protein kinase binding; enzyme binding; GPI anchor binding	membrane; plasma membrane; membrane raft; cell surface; focal adhesion; extracellular region; anchored component of membrane; growth cone; extracellular exosome; endoplasmic reticulum; anchored component of external side of plasma membrane; cytosol; external side of plasma membrane; dendrite; axolemma; dendrite membrane; neuronal cell body membrane; anchored component of plasma membrane; integral…
LDB2	2.21668e-15	-0.251234	0.011	0.14	8.11326e-11	regulation of transcription by RNA polymerase II; positive regulation of transcription by RNA polymerase II; negative regulation of transcription by RNA polymerase II; negative regulation of transcription, DNA-templated; multicellular organism development; regulation of cell migration; regulation of kinase activity; hair follicle development; epithelial structure maintenance; somatic stem cell po…	transcription coregulator activity; LIM domain binding; protein binding; RNA polymerase II activating transcription factor binding; enzyme binding	nucleus; nucleolus; plasma membrane; transcription factor complex; cell leading edge
RBFOX3	2.54363e-15	-0.279143	0.197	0.404	9.30994e-11	mRNA processing; RNA splicing; regulation of RNA splicing; regulation of alternative mRNA splicing, via spliceosome; nervous system development	nucleic acid binding; RNA binding; mRNA binding; DNA binding	nucleus; cytoplasm; neuronal cell body; perikaryon
FOXO6	2.88433e-15	-0.240475	0.09	0.262	1.05569e-10	regulation of transcription, DNA-templated; positive regulation of transcription by RNA polymerase II; negative regulation of transcription by RNA polymerase II; regulation of transcription by RNA polymerase II; memory; insulin receptor signaling pathway; glucose homeostasis; positive regulation of dendritic spine development	DNA binding; DNA-binding transcription factor activity; sequence-specific DNA binding; protein binding; DNA-binding transcription factor activity, RNA polymerase II-specific; transcription factor binding	nucleus; cytoplasm; nuclear chromatin
AFDN	2.93484e-15	0.319753	0.919	0.892	1.07418e-10	signal transduction; negative regulation of cell migration; cell adhesion; positive regulation of GTPase activity; positive regulation of gene expression; regulation of protein localization; cell-cell signaling; pore complex assembly; adherens junction organization; positive regulation of cell-cell adhesion; bicellular tight junction assembly; cell-cell adhesion mediated by cadherin; establishmen…	protein binding; cadherin binding; protein C-terminus binding; actin filament binding; cell adhesion molecule binding; Ras GTPase binding	plasma membrane; cell junction; nuclear speck; cytosol; nucleoplasm; adherens junction; cell-cell adherens junction; cell-cell junction; pore complex; tight junction; cell-cell contact zone; cytoplasm; apical junction complex; apical part of cell
CDK2AP1	3.03978e-15	0.348927	0.365	0.224	1.11259e-10	cell cycle; positive regulation of protein phosphorylation; DNA-dependent DNA replication	protein binding; DNA polymerase binding	nucleus; cytosol; nucleoplasm; perinuclear region of cytoplasm
ALDH7A1	3.42305e-15	0.298662	0.344	0.201	1.25287e-10	oxidation-reduction process; lysine catabolic process; sensory perception of sound; cellular aldehyde metabolic process; glycine betaine biosynthetic process from choline; choline catabolic process	oxidoreductase activity; oxidoreductase activity, acting on the aldehyde or oxo group of donors, NAD or NADP as acceptor; protein binding; aldehyde dehydrogenase (NAD) activity; glyceraldehyde-3-phosphate dehydrogenase (NAD+) (non-phosphorylating) activity; L-aminoadipate-semialdehyde dehydrogenase activity; betaine-aldehyde dehydrogenase activity	cytosol; mitochondrion; nucleus; cytoplasm; extracellular exosome; mitochondrial matrix
IGDCC3	3.50406e-15	0.414374	0.462	0.318	1.28252e-10	neuromuscular process controlling balance	protein binding	membrane; integral component of membrane; integral component of plasma membrane
CNTN1	4.62475e-15	-0.350756	0.173	0.367	1.6927e-10	nervous system development; cell adhesion; neuron projection development; Notch signaling pathway; positive regulation of gene expression; positive regulation of sodium ion transport; positive regulation of neuron projection development; cerebellum development; positive regulation of peptidyl-tyrosine phosphorylation	protein binding; carbohydrate binding	membrane; plasma membrane; anchored component of membrane; extracellular exosome; membrane raft; anchored component of postsynaptic membrane; anchored component of presynaptic membrane
SLA	4.74382e-15	-0.31883	0.453	0.719	1.73628e-10	positive regulation of signal transduction; regulation of signal transduction; cell differentiation; transmembrane receptor protein tyrosine kinase signaling pathway; regulation of cell population proliferation; peptidyl-tyrosine autophosphorylation	protein binding; SH3/SH2 adaptor activity; signaling receptor binding; non-membrane spanning protein tyrosine kinase activity	cytoplasm; endosome; extrinsic component of cytoplasmic side of plasma membrane
BCL11B	5.13521e-15	0.383793	0.925	0.866	1.87954e-10	regulation of transcription, DNA-templated; positive regulation of transcription by RNA polymerase II; keratinocyte development; epithelial cell morphogenesis; axonogenesis; negative regulation of cell population proliferation; post-embryonic development; regulation of gene expression; regulation of keratinocyte proliferation; regulation of lipid metabolic process; striatal medium spiny neuron di…	nucleic acid binding; metal ion binding; protein binding; DNA-binding transcription factor activity; sequence-specific DNA binding; DNA-binding transcription factor activity, RNA polymerase II-specific; RNA polymerase II proximal promoter sequence-specific DNA binding; DNA-binding transcription activator activity, RNA polymerase II-specific	nucleus; neuron projection
UBE2E3	5.5254e-15	0.373514	0.75	0.676	2.02235e-10	protein ubiquitination; protein K11-linked ubiquitination; protein K48-linked ubiquitination; regulation of growth; protein K63-linked ubiquitination	nucleotide binding; ATP binding; transferase activity; protein binding; ubiquitin-protein transferase activity; ubiquitin conjugating enzyme activity	nucleus; cytoplasm; nucleoplasm; cytosol
NFIA	6.49071e-15	0.505992	0.925	0.937	2.37566e-10	regulation of transcription, DNA-templated; DNA replication; positive regulation of transcription by RNA polymerase II; negative regulation of transcription by RNA polymerase II; viral genome replication; synapse maturation; ureter development	DNA binding; DNA-binding transcription factor activity; DNA-binding transcription factor activity, RNA polymerase II-specific; RNA polymerase II proximal promoter sequence-specific DNA binding; DNA-binding transcription activator activity, RNA polymerase II-specific; transcription factor binding; chromatin binding	nucleus; nucleoplasm; cell junction; intracellular; nuclear chromatin
SOX4	7.22899e-15	0.277441	0.998	1	2.64588e-10	positive regulation of cell population proliferation; positive regulation of apoptotic process; protein stabilization; ventricular septum morphogenesis; positive regulation of canonical Wnt signaling pathway; positive regulation of transcription, DNA-templated; positive regulation of translation; regulation of transcription, DNA-templated; cell differentiation; positive regulation of transcriptio…	DNA binding; DNA-binding transcription factor activity; protein binding; transcription coactivator activity; DNA-binding transcription factor activity, RNA polymerase II-specific; transcription regulatory region sequence-specific DNA binding; RNA polymerase II proximal promoter sequence-specific DNA binding; DNA-binding transcription activator activity, RNA polymerase II-specific	cytoplasm; nucleus; nucleoplasm; mitochondrion; nuclear transcription factor complex; nuclear chromatin
LGALS3BP	7.99597e-15	0.191669	0.12	0.038	2.9266e-10	endocytosis; cell adhesion; signal transduction; platelet degranulation; cellular defense response	scavenger receptor activity; protein binding	membrane; extracellular space; extracellular region; extracellular exosome; blood microparticle; collagen-containing extracellular matrix; platelet dense granule lumen
RCN2	8.85937e-15	0.301672	0.906	0.886	3.24262e-10		metal ion binding; calcium ion binding; protein binding	endoplasmic reticulum; nucleolus; endoplasmic reticulum lumen
LINGO1	9.77159e-15	-0.34811	0.406	0.602	3.5765e-10	negative regulation of axonogenesis	protein binding; epidermal growth factor receptor binding	membrane; integral component of membrane; plasma membrane; extracellular space; extracellular matrix
DTD1	1.08553e-14	0.323997	0.801	0.757	3.97314e-10	DNA replication; aminoacyl-tRNA metabolism involved in translational fidelity; tRNA metabolic process	RNA binding; metal ion binding; hydrolase activity; DNA binding; tRNA binding; aminoacyl-tRNA editing activity; D-aminoacyl-tRNA deacylase activity; D-tyrosyl-tRNA(Tyr) deacylase activity	nucleus; cytoplasm; nucleolus; cytosol
ZBTB18	1.17966e-14	-0.38679	0.558	0.735	4.31768e-10	multicellular organism development; negative regulation of transcription by RNA polymerase II; cellular response to DNA damage stimulus; negative regulation of transcription, DNA-templated; positive regulation of transcription by RNA polymerase II; skeletal muscle tissue development	nucleic acid binding; metal ion binding; DNA binding; protein binding; sequence-specific DNA binding; DNA-binding transcription factor activity, RNA polymerase II-specific; DNA-binding transcription factor activity; transcription coactivator activity	nucleus; nuclear chromosome
MYO1B	1.23681e-14	0.218436	0.156	0.061	4.52684e-10	actin filament organization; actin filament bundle assembly; post-Golgi vesicle-mediated transport; actin filament-based movement	nucleotide binding; ATP binding; motor activity; actin binding; calmodulin binding; cadherin binding; actin filament binding; phosphatidylinositol-4,5-bisphosphate binding; phosphatidylinositol-3,4,5-trisphosphate binding; microfilament motor activity; protein binding; actin-dependent ATPase activity	myosin complex; cytoplasm; plasma membrane; perinuclear region of cytoplasm; early endosome; filopodium; extracellular exosome; cell periphery; endosome membrane; brush border; actin filament; trans-Golgi network membrane; apical part of cell
SH3GL2	1.41441e-14	-0.304909	0.162	0.348	5.1769e-10	endocytosis; antigen processing and presentation of exogenous peptide antigen via MHC class II; signal transduction; central nervous system development; membrane organization; neuron projection development; negative regulation of epidermal growth factor receptor signaling pathway; dendrite extension; cellular response to brain-derived neurotrophic factor stimulus; regulation of receptor internali…	protein binding; lipid binding; identical protein binding; protein C-terminus binding; protein kinase binding; protein homodimerization activity	cytoplasm; membrane; plasma membrane; endosome; early endosome; cytosol; Golgi membrane; clathrin-coated endocytic vesicle membrane; synaptic vesicle membrane; neuronal cell body; synapse; perinuclear region of cytoplasm; basal dendrite; photoreceptor ribbon synapse; Schaffer collateral - CA1 synapse; hippocampal mossy fiber to CA3 synapse; presynapse; glutamatergic synapse; presynaptic cytosol
NKAIN2	1.48206e-14	-0.243748	0	0.114	5.4245e-10	regulation of sodium ion transport		membrane; integral component of membrane; plasma membrane
PAICS	1.63345e-14	-0.308864	0.246	0.445	5.97859e-10	purine nucleotide biosynthetic process; 'de novo' IMP biosynthetic process; metabolic process; purine ribonucleoside monophosphate biosynthetic process; purine nucleobase biosynthetic process	phosphoribosylaminoimidazolesuccinocarboxamide synthase activity; nucleotide binding; ATP binding; lyase activity; ligase activity; protein binding; catalytic activity; carboxy-lyase activity; identical protein binding; cadherin binding; phosphoribosylaminoimidazole carboxylase activity; 5-amino-4-imidazole carboxylate lyase activity	cytoplasm; membrane; cytosol; extracellular exosome
RPLP1	1.85995e-14	-0.204737	1	0.999	6.80759e-10	translation; cytoplasmic translation; translational elongation; regulation of translation; activation of protein kinase activity; viral transcription; translational initiation; nuclear-transcribed mRNA catabolic process, nonsense-mediated decay; SRP-dependent cotranslational protein targeting to membrane	structural constituent of ribosome; protein binding; ribonucleoprotein complex binding; protein kinase activator activity	ribosome; focal adhesion; cytosolic large ribosomal subunit; cytosol; intracellular
HMGCS1	1.8666e-14	-0.523325	0.635	0.758	6.83196e-10	lipid metabolic process; liver development; steroid biosynthetic process; brain development; steroid metabolic process; isoprenoid biosynthetic process; male gonad development; response to low light intensity stimulus; response to hormone; response to organic substance; response to organic cyclic compound; response to purine-containing compound; sterol biosynthetic process; response to vitamin E;…	transferase activity; catalytic activity; protein homodimerization activity; hydroxymethylglutaryl-CoA synthase activity; drug binding; isomerase activity; organic acid binding	cytoplasm; cytosol
ADAMTS3	1.98456e-14	-0.267208	0.026	0.159	7.26368e-10	proteolysis; in utero embryonic development; vascular endothelial growth factor production; protein processing; collagen fibril organization; collagen catabolic process; collagen biosynthetic process; supramolecular fiber organization; positive regulation of vascular endothelial growth factor signaling pathway	metal ion binding; hydrolase activity; zinc ion binding; peptidase activity; metalloendopeptidase activity; metallopeptidase activity; heparin binding; protein binding; endopeptidase activity	extracellular space; extracellular region; extracellular exosome; collagen-containing extracellular matrix; extracellular matrix
MLLT3	1.99688e-14	-0.329464	0.476	0.681	7.30876e-10	regulation of transcription, DNA-templated; positive regulation of transcription, DNA-templated; regulation of transcription by RNA polymerase II; segment specification; anterior/posterior pattern specification; transcription by RNA polymerase II; transcription elongation from RNA polymerase II promoter; negative regulation of canonical Wnt signaling pathway; positive regulation of Wnt signaling …	protein binding; DNA-binding transcription factor activity, RNA polymerase II-specific; chromatin binding; histone binding; lysine-acetylated histone binding; modification-dependent protein binding	nucleus; chromosome; nucleoplasm; extracellular exosome; transcription elongation factor complex
NEUROG2	2.08682e-14	0.433565	0.62	0.478	7.63798e-10	regulation of transcription, DNA-templated; neuron differentiation; multicellular organism development; cell differentiation; regulation of transcription by RNA polymerase II; nervous system development; positive regulation of DNA-binding transcription factor activity	protein dimerization activity; DNA binding; DNA-binding transcription factor activity, RNA polymerase II-specific; E-box binding	nucleus; nuclear chromatin
NKAIN3	2.1604e-14	0.352754	0.376	0.234	7.9073e-10	regulation of sodium ion transport		membrane; integral component of membrane; plasma membrane
LMO2	2.18976e-14	0.265033	0.145	0.053	8.01474e-10	positive regulation of transcription by RNA polymerase II; regulation of hematopoietic stem cell differentiation; multicellular organism development; cellular response to thyroid hormone stimulus; mRNA transcription by RNA polymerase II	metal ion binding; protein binding; RNA polymerase II regulatory region sequence-specific DNA binding; DNA-binding transcription activator activity, RNA polymerase II-specific; bHLH transcription factor binding; DNA-binding transcription factor activity, RNA polymerase II-specific; RNA polymerase II activating transcription factor binding; E-box binding; cofactor binding	nucleus; nucleoplasm; transcription factor complex
CTTNBP2	2.23272e-14	-0.371833	0.459	0.662	8.17197e-10	brain development; regulation of synapse organization; regulation of modification of postsynaptic actin cytoskeleton	SH3 domain binding; protein binding	cytoplasm; cell projection; cell cortex; dendritic spine; synaptic vesicle; postsynaptic actin cytoskeleton; glutamatergic synapse
ID4	2.30949e-14	0.469335	0.489	0.344	8.45298e-10	negative regulation of transcription, DNA-templated; neuron differentiation; regulation of cell cycle; circadian rhythm; regulation of transcription by RNA polymerase II; negative regulation of DNA binding; negative regulation of neuron differentiation; G1/S transition of mitotic cell cycle; negative regulation of transcription by RNA polymerase II; osteoblast differentiation; neuroblast prolifer…	protein dimerization activity; protein binding; DNA-binding transcription factor activity; DNA-binding transcription factor activity, RNA polymerase II-specific; transcription factor binding; transcription corepressor activity; RNA polymerase II transcription factor binding	nucleus; cytoplasm
PAX6	2.36028e-14	0.381826	0.278	0.149	8.63888e-10	positive regulation of gene expression; positive regulation of transcription by RNA polymerase II; positive regulation of transcription, DNA-templated; regulation of transcription, DNA-templated; multicellular organism development; cell differentiation; negative regulation of transcription by RNA polymerase II; visual perception; central nervous system development; animal organ morphogenesis; tra…	DNA binding; sequence-specific DNA binding; protein binding; DNA-binding transcription factor activity, RNA polymerase II-specific; R-SMAD binding; DNA-binding transcription factor activity; protein kinase binding; RNA polymerase II proximal promoter sequence-specific DNA binding; transcription factor binding; histone acetyltransferase binding; RNA polymerase II core promoter sequence-specific DN…	nucleus; cytoplasm; cytosol; nucleoplasm; nuclear chromatin; membrane; integral component of membrane
PPP1R18	2.39976e-14	0.302653	0.363	0.227	8.78335e-10		actin binding; protein binding; phosphatase binding	cytoplasm; cytoskeleton
NEGR1	4.07502e-14	-0.532342	0.145	0.312	1.4915e-09	cell adhesion; locomotory behavior; feeding behavior; positive regulation of neuron projection development; cell-cell adhesion	protein binding	membrane; plasma membrane; extracellular region; anchored component of membrane
MXRA7	4.18322e-14	0.313564	0.372	0.238	1.5311e-09			membrane; integral component of membrane; collagen-containing extracellular matrix
RPL36	5.49049e-14	-0.222085	0.987	0.996	2.00957e-09	translation; cytoplasmic translation; viral transcription; translational initiation; nuclear-transcribed mRNA catabolic process, nonsense-mediated decay; SRP-dependent cotranslational protein targeting to membrane	RNA binding; structural constituent of ribosome	cytoplasm; membrane; ribosome; cytosol; nucleolus; cytosolic large ribosomal subunit; polysomal ribosome; intracellular
BAIAP2-DT	5.50592e-14	-0.246243	0.197	0.393	2.01522e-09
JPH4	6.48517e-14	-0.301865	0.41	0.614	2.37364e-09	release of sequestered calcium ion into cytosol; regulation of ryanodine-sensitive calcium-release channel activity; calcium ion transport into cytosol; regulation of synaptic plasticity; regulation of cytokine production; learning; neuromuscular process controlling balance; regulation of store-operated calcium entry	calcium-release channel activity	membrane; integral component of membrane; endoplasmic reticulum; endoplasmic reticulum membrane; plasma membrane; junctional membrane complex; junctional sarcoplasmic reticulum membrane; smooth endoplasmic reticulum; dendritic shaft
PRDX1	7.68658e-14	0.358498	0.919	0.881	2.81337e-09	oxidation-reduction process; cell redox homeostasis; retina homeostasis; response to oxidative stress; skeletal system development; natural killer cell activation; removal of superoxide radicals; cellular response to oxidative stress; hydrogen peroxide catabolic process; cell population proliferation; leukocyte activation; cellular oxidant detoxification; response to reactive oxygen species; regu…	RNA binding; oxidoreductase activity; protein binding; peroxidase activity; peroxiredoxin activity; antioxidant activity; cadherin binding; thioredoxin peroxidase activity; identical protein binding	cell; nucleus; cytoplasm; extracellular space; melanosome; cytosol; extracellular exosome
TNR	9.53413e-14	-0.239122	0.071	0.224	3.48959e-09	cell adhesion; regulation of neurogenesis; extracellular matrix organization; axon guidance; neuron cell-cell adhesion; associative learning; negative regulation of neuron projection development; telencephalon cell migration; negative regulation of cell-cell adhesion; negative regulation of axon extension; locomotory exploration behavior; negative regulation of axon extension involved in regenera…	protein binding	extracellular region; collagen-containing extracellular matrix; cell surface; extracellular matrix; membrane raft; perineuronal net; Schaffer collateral - CA1 synapse; glutamatergic synapse
NPTX2	1.06419e-13	0.191478	0.111	0.036	3.89504e-09	chemical synaptic transmission; regulation of postsynaptic neurotransmitter receptor activity; associative learning	metal ion binding; carbohydrate binding	extracellular region; glutamatergic synapse
VSNL1	1.11141e-13	-0.25003	0.032	0.164	4.06787e-09	positive regulation of insulin secretion involved in cellular response to glucose stimulus; positive regulation of exocytosis; negative regulation of insulin secretion	metal ion binding; calcium ion binding; protein binding	cytosol; membrane
LSAMP	1.14386e-13	0.403467	0.41	0.269	4.18663e-09	cell adhesion; nervous system development	protein binding	membrane; cytosol; plasma membrane; extracellular region; anchored component of membrane; integral component of membrane
SNX10	1.16585e-13	-0.277259	0.235	0.43	4.26713e-09	protein transport; cilium assembly; protein localization to cilium; cell projection organization; osteoclast differentiation; endosome organization; protein localization to centrosome; gastric acid secretion; endocytosis; bone mineralization; tooth eruption; bone resorption; calcium ion homeostasis; ruffle assembly; cellular response to leukemia inhibitory factor	phosphatidylinositol binding; protein binding; lipid binding; ATPase binding; 1-phosphatidylinositol binding	nucleus; cytoplasm; membrane; endoplasmic reticulum; cytoskeleton; centrosome; microtubule organizing center; endosome; extrinsic component of endosome membrane; endosome membrane; secretory granule; apical cytoplasm
RPL37A	1.20582e-13	-0.201575	0.998	1	4.41342e-09	translation; viral transcription; translational initiation; nuclear-transcribed mRNA catabolic process, nonsense-mediated decay; SRP-dependent cotranslational protein targeting to membrane	RNA binding; metal ion binding; structural constituent of ribosome; protein binding	nucleus; ribosome; focal adhesion; cytosol; extracellular exosome; cytosolic large ribosomal subunit; intracellular
PTPRD	1.21835e-13	0.435896	0.598	0.488	4.45929e-09	protein dephosphorylation; dephosphorylation; peptidyl-tyrosine dephosphorylation; phosphate-containing compound metabolic process; regulation of presynapse assembly; positive regulation of synapse assembly; heterophilic cell-cell adhesion via plasma membrane cell adhesion molecules; synaptic membrane adhesion; transmembrane receptor protein tyrosine phosphatase signaling pathway; positive regula…	hydrolase activity; phosphoprotein phosphatase activity; protein binding; protein tyrosine phosphatase activity; phosphatase activity; signaling receptor binding; cell adhesion molecule binding; transmembrane receptor protein tyrosine phosphatase activity	membrane; integral component of membrane; plasma membrane; extracellular exosome; integral component of plasma membrane; glutamatergic synapse
C2orf66	1.24424e-13	0.41467	0.389	0.247	4.55404e-09			extracellular region
GRM5	1.37237e-13	-0.228636	0.021	0.145	5.02302e-09	cellular response to amyloid-beta; G protein-coupled receptor signaling pathway; signal transduction; regulation of postsynaptic membrane potential; G protein-coupled glutamate receptor signaling pathway; regulation of synaptic transmission, glutamatergic; chemical synaptic transmission; cognition; learning or memory; modulation of age-related behavioral decline; synapse organization; calcium-med…	G protein-coupled receptor activity; protein binding; glutamate receptor activity; protein tyrosine kinase binding; protein tyrosine kinase activator activity; G protein-coupled receptor activity involved in regulation of postsynaptic membrane potential; neurotransmitter receptor activity involved in regulation of postsynaptic cytosolic calcium ion concentration	membrane; integral component of membrane; plasma membrane; integral component of plasma membrane; postsynaptic density membrane; cytoplasm; neuron projection; Schaffer collateral - CA1 synapse
MDGA1	1.48405e-13	0.203271	0.111	0.036	5.43177e-09	multicellular organism development; cell differentiation; nervous system development; regulation of presynapse assembly; neuron migration; brain development; spinal cord association neuron differentiation; regulation of synaptic membrane adhesion	protein binding	membrane; extracellular space; plasma membrane; extracellular region; anchored component of membrane; anchored component of plasma membrane; GABA-ergic synapse
GPR12	1.49938e-13	-0.247596	0.139	0.314	5.48787e-09	G protein-coupled receptor signaling pathway; signal transduction; cellular calcium ion homeostasis	G protein-coupled receptor activity; phosphatidylcholine binding	cell; membrane; integral component of membrane; plasma membrane; integral component of plasma membrane
MSRB2	1.59957e-13	0.367084	0.481	0.351	5.85459e-09	oxidation-reduction process; response to oxidative stress; protein repair; actin filament polymerization	metal ion binding; oxidoreductase activity; actin binding; peptide-methionine (R)-S-oxide reductase activity; oxidoreductase activity, acting on a sulfur group of donors, disulfide as acceptor; zinc ion binding; L-methionine-(R)-S-oxide reductase activity	mitochondrion; cytosol
RAB26	1.60601e-13	0.363147	0.263	0.144	5.87815e-09	protein transport; intracellular protein transport; Rab protein signal transduction; regulated exocytosis; regulation of exocytosis; Golgi to plasma membrane protein transport; exocrine system development; regulation of protein catabolic process at presynapse, modulating synaptic transmission	GTPase activity; GTP binding; nucleotide binding; protein binding; GMP binding	membrane; Golgi apparatus; Golgi membrane; cytoplasmic vesicle; intrinsic component of plasma membrane; transport vesicle membrane; secretory granule membrane; anchored component of synaptic vesicle membrane
SRP14	1.78678e-13	0.234116	0.985	0.983	6.53979e-09	SRP-dependent cotranslational protein targeting to membrane; neutrophil degranulation; protein targeting to ER; response to drug; cotranslational protein targeting to membrane	RNA binding; protein binding; 7S RNA binding; endoplasmic reticulum signal peptide binding	nucleus; cytoplasm; signal recognition particle; extracellular region; cytosol; signal recognition particle, endoplasmic reticulum targeting; secretory granule lumen; ficolin-1-rich granule lumen
NPTXR	1.83626e-13	-0.219021	0.107	0.274	6.7209e-09	regulation of postsynaptic neurotransmitter receptor activity	metal ion binding	membrane; integral component of membrane; glutamatergic synapse
MLLT11	2.07589e-13	0.278241	0.974	0.965	7.59795e-09	positive regulation of transcription, DNA-templated; apoptotic signaling pathway; positive regulation of apoptotic process; extrinsic apoptotic signaling pathway; positive regulation of release of cytochrome c from mitochondria; intrinsic apoptotic signaling pathway; positive regulation of mitochondrial depolarization	protein binding	nucleus; cytoplasm; cytosol; nucleoplasm; cytoskeleton; microtubule organizing center
SPRY2	2.34731e-13	-0.290737	0.071	0.217	8.59139e-09	negative regulation of angiogenesis; cellular response to vascular endothelial growth factor stimulus; negative regulation of ERK1 and ERK2 cascade; negative regulation of vascular endothelial growth factor signaling pathway; positive regulation of cell migration; negative regulation of apoptotic process; multicellular organism development; regulation of cell differentiation; positive regulation …	protein binding; protein serine/threonine kinase activator activity; protein kinase binding; protein serine/threonine kinase inhibitor activity	nucleus; cytoplasm; membrane; plasma membrane; microtubule cytoskeleton; cytoskeleton; cell projection; microtubule; cytosol; ruffle membrane
SLC25A3	2.43905e-13	0.263898	0.915	0.9	8.92716e-09	proton transmembrane transport; phosphate ion transmembrane transport	symporter activity; protein-containing complex binding; inorganic phosphate transmembrane transporter activity; phosphate:proton symporter activity	membrane; integral component of membrane; mitochondrion; mitochondrial inner membrane; extracellular exosome; integral component of plasma membrane; integral component of mitochondrial inner membrane
JPT1	2.67829e-13	0.21098	0.991	0.993	9.80282e-09			nucleus; cytoplasm; nucleolus; nuclear membrane
MT-CO3	2.73472e-13	0.258008	0.983	0.985	1.00093e-08	proton transmembrane transport; transmembrane transport; respiratory electron transport chain; aerobic respiration; mitochondrial electron transport, cytochrome c to oxygen; respiratory chain complex IV assembly; aerobic electron transport chain	protein binding; cytochrome-c oxidase activity; electron transfer activity; heme-copper terminal oxidase activity; oxidoreduction-driven active transmembrane transporter activity	membrane; integral component of membrane; mitochondrial inner membrane; mitochondrion; respiratory chain complex IV
DLGAP1	2.85899e-13	-0.253435	0.216	0.409	1.04642e-08	chemical synaptic transmission; signaling	protein binding; protein-containing complex binding	synapse; membrane; plasma membrane; cell junction; postsynaptic membrane; postsynaptic density
DACH2	3.2474e-13	-0.216751	0.051	0.189	1.18858e-08	multicellular organism development; regulation of transcription by RNA polymerase II; regulation of transcription, DNA-templated; development of primary female sexual characteristics	DNA binding; DNA-binding transcription factor activity, RNA polymerase II-specific	nucleus; transcription factor complex
PHC2	3.75915e-13	0.325372	0.528	0.407	1.37589e-08	multicellular organism development; spermatogenesis	zinc ion binding; metal ion binding; DNA binding; protein binding; identical protein binding	nucleus; nucleoplasm; PcG protein complex; PRC1 complex; heterochromatin
GOLGA8A	3.83052e-13	-0.319076	0.237	0.423	1.40201e-08	Golgi organization		membrane; Golgi apparatus; cytosol; Golgi cis cisterna; cis-Golgi network; Golgi cisterna membrane
TCP10L	3.92496e-13	0.24427	0.165	0.071	1.43657e-08	negative regulation of transcription by RNA polymerase II	protein binding; identical protein binding; transcription corepressor activity; repressing transcription factor binding; protein self-association	nucleus; centriole
GNAI1	4.53125e-13	-0.346066	0.509	0.685	1.65848e-08	G protein-coupled receptor signaling pathway; signal transduction; cell division; cell cycle; adenylate cyclase-modulating G protein-coupled receptor signaling pathway; protein folding; adenylate cyclase-inhibiting G protein-coupled receptor signaling pathway; cellular response to forskolin; positive regulation of protein localization to cell cortex; response to peptide hormone; regulation of mit…	metal ion binding; nucleotide binding; GTPase activity; GTP binding; protein binding; guanyl nucleotide binding; G-protein beta/gamma-subunit complex binding; magnesium ion binding; G protein-coupled receptor binding; GDP binding; G protein-coupled serotonin receptor binding; GTPase activating protein binding	nucleus; cytoplasm; membrane; centrosome; nucleolus; lysosomal membrane; plasma membrane; cytoskeleton; heterotrimeric G-protein complex; microtubule organizing center; midbody; extracellular exosome; cell cortex; cell cortex region; protein-containing complex; membrane raft
MAT2B	4.6058e-13	0.202312	0.162	0.069	1.68577e-08	one-carbon metabolic process; regulation of catalytic activity; S-adenosylmethionine biosynthetic process; methylation	protein binding; enzyme binding; methionine adenosyltransferase regulator activity	nucleus; cytosol; extracellular exosome; methionine adenosyltransferase complex
SLC12A5	4.8682e-13	-0.242516	0.182	0.366	1.78181e-08	transmembrane transport; ion transport; potassium ion transport; chemical synaptic transmission; chloride transmembrane transport; cell volume homeostasis; chloride ion homeostasis; potassium ion homeostasis; potassium ion import across plasma membrane; dendritic spine development; cellular ion homeostasis; chloride transport; hypotonic response; learning; cellular chloride ion homeostasis; multi…	transmembrane transporter activity; symporter activity; cation:chloride symporter activity; potassium:chloride symporter activity; chloride transmembrane transporter activity; transporter activity	membrane; integral component of membrane; integral component of plasma membrane; plasma membrane
NPR3	4.89872e-13	-0.295056	0.009	0.118	1.79298e-08	skeletal system development; regulation of blood pressure; negative regulation of cold-induced thermogenesis; positive regulation of nitric-oxide synthase activity; positive regulation of urine volume; osteoclast proliferation; adenylate cyclase-inhibiting G protein-coupled receptor signaling pathway; negative regulation of adenylate cyclase activity; phospholipase C-activating G protein-coupled …	protein binding; protein homodimerization activity; peptide hormone binding; natriuretic peptide receptor activity; chloride ion binding; G protein-coupled peptide receptor activity; peptide binding; hormone binding	membrane; integral component of membrane; extracellular exosome; protein-containing complex; integral component of plasma membrane
ENHO	5.49098e-13	-0.283062	0.365	0.559	2.00975e-08	signal transduction; positive regulation of Notch signaling pathway; negative regulation of insulin receptor signaling pathway; negative regulation of insulin secretion; negative regulation of lipid biosynthetic process; negative regulation of RNA polymerase II regulatory region sequence-specific DNA binding	hormone activity	extracellular region; plasma membrane
MAP1B	5.56888e-13	0.191071	1	1	2.03827e-08	nervous system development; microtubule cytoskeleton organization; dendrite development; axonogenesis; cellular process; axon extension; microtubule bundle formation; neuron migration; negative regulation of microtubule depolymerization; synapse assembly; response to wounding; response to mechanical stimulus; response to carbohydrate; response to inorganic substance; peripheral nervous system axo…	microtubule binding; protein binding; tubulin binding; actin binding; structural molecule activity; phospholipid binding; protein-containing complex binding	microtubule; neuronal cell body; cytoplasm; cytosol; cytoskeleton; cell projection; cell junction; synapse; dendritic spine; dendrite; microtubule associated complex; axon; somatodendritic compartment; basal dendrite; photoreceptor outer segment; plasma membrane; postsynaptic density; growth cone; varicosity; perikaryon; perinuclear region of cytoplasm; apical dendrite; hippocampal mossy fiber
NCOA7	5.80333e-13	-0.25696	0.177	0.354	2.12408e-08	positive regulation of transcription by RNA polymerase II; negative regulation of cellular response to oxidative stress; negative regulation of peptidyl-cysteine S-nitrosylation; negative regulation of oxidative stress-induced neuron death	protein binding; nuclear receptor transcription coactivator activity; nuclear hormone receptor binding	nucleus; intracellular
PCLO	6.12883e-13	-0.361509	0.673	0.817	2.24321e-08	cytoskeleton organization; synapse assembly; maintenance of presynaptic active zone structure; synaptic vesicle exocytosis; regulation of exocytosis; cAMP-mediated signaling; insulin secretion; protein localization to synapse; synaptic vesicle clustering; presynapse to nucleus signaling pathway	metal ion binding; calcium-dependent phospholipid binding; calcium ion binding; profilin binding; structural constituent of presynaptic active zone; protein binding	cytoskeleton; cell junction; synapse; presynaptic active zone; extracellular exosome; cytoskeleton of presynaptic active zone; postsynaptic density; presynaptic active zone cytoplasmic component; membrane; integral component of membrane
MYL6	6.483e-13	0.466462	0.944	0.956	2.37284e-08	muscle contraction; skeletal muscle tissue development; muscle filament sliding	calcium ion binding; protein binding; actin-dependent ATPase activity; motor activity; structural constituent of muscle	membrane; myosin complex; cytosol; extracellular exosome; brush border; vesicle; unconventional myosin complex
CTNND2	6.56836e-13	-0.441879	0.397	0.557	2.40409e-08	cell adhesion; multicellular organism development; Wnt signaling pathway; cell-cell adhesion; signal transduction; cell-cell junction assembly; dendritic spine morphogenesis; synapse organization; regulation of canonical Wnt signaling pathway	protein binding; cadherin binding; beta-catenin binding	nucleus; cell projection; cell junction; dendrite; cytoplasm; plasma membrane; perikaryon; cell-cell junction; adherens junction; postsynaptic density; cell-cell adherens junction
TRPS1	7.00587e-13	0.325336	0.254	0.136	2.56422e-08	regulation of transcription, DNA-templated; negative regulation of transcription by RNA polymerase II; skeletal system development; regulation of chondrocyte differentiation; protein heterooligomerization	nucleic acid binding; zinc ion binding; metal ion binding; DNA binding; DNA-binding transcription factor activity; sequence-specific DNA binding; protein binding; DNA-binding transcription factor activity, RNA polymerase II-specific; DNA-binding transcription repressor activity, RNA polymerase II-specific; protein domain specific binding; RNA polymerase II regulatory region sequence-specific DNA …	nucleus; nucleoplasm; nuclear chromatin; protein-containing complex
NRP2	7.07324e-13	0.36695	0.562	0.413	2.58887e-08	positive regulation of endothelial cell migration; cell adhesion; axon guidance; multicellular organism development; cell differentiation; angiogenesis; nervous system development; viral process; vascular endothelial growth factor signaling pathway; positive regulation of endothelial cell proliferation; vascular endothelial growth factor receptor signaling pathway; outflow tract septum morphogene…	metal ion binding; protein binding; semaphorin receptor activity; vascular endothelial growth factor-activated receptor activity; heparin binding; signaling receptor activity; growth factor binding; cytokine binding	membrane; integral component of membrane; extracellular region; plasma membrane; semaphorin receptor complex; axon; glutamatergic synapse; integral component of postsynaptic membrane
RSPO3	7.6218e-13	-0.364424	0.015	0.127	2.78965e-08	Wnt signaling pathway; positive regulation of Wnt signaling pathway; response to stimulus; sprouting angiogenesis; regulation of Wnt signaling pathway; blood vessel remodeling; positive regulation of non-canonical Wnt signaling pathway; angiogenesis; branching involved in labyrinthine layer morphogenesis; positive regulation of canonical Wnt signaling pathway; positive regulation of Wnt signaling…	heparin binding; signaling receptor binding; frizzled binding	extracellular region
TMEM132A	8.09866e-13	-0.321977	0.556	0.735	2.96419e-08	cellular protein metabolic process; post-translational protein modification		membrane; integral component of membrane; endoplasmic reticulum; endoplasmic reticulum membrane; Golgi apparatus; Golgi membrane; extracellular exosome; endoplasmic reticulum lumen
GRIA2	8.29949e-13	-0.350632	0.767	0.899	3.0377e-08	ion transport; ion transmembrane transport; regulation of postsynaptic membrane potential; modulation of chemical synaptic transmission; signal transduction; chemical synaptic transmission; synaptic transmission, glutamatergic; ionotropic glutamate receptor signaling pathway; regulation of NMDA receptor activity	ion channel activity; protein binding; signaling receptor activity; ionotropic glutamate receptor activity; ligand-gated ion channel activity; amyloid-beta binding; glutamate receptor activity; transmitter-gated ion channel activity involved in regulation of postsynaptic membrane potential; AMPA glutamate receptor activity	membrane; integral component of membrane; endoplasmic reticulum; endoplasmic reticulum membrane; plasma membrane; cell junction; synapse; postsynaptic membrane; integral component of plasma membrane; AMPA glutamate receptor complex; endocytic vesicle membrane; postsynaptic density membrane; dendrite; postsynapse; postsynaptic density; external side of plasma membrane; dendritic spine; excitatory …
LINC00205	8.85557e-13	-0.272533	0.297	0.493	3.24123e-08
DCXR	9.07187e-13	0.357798	0.429	0.314	3.3204e-08	oxidation-reduction process; carbohydrate metabolic process; glucose metabolic process; xylulose metabolic process; NADP metabolic process; protein homotetramerization; glucuronate catabolic process to xylulose 5-phosphate; D-xylose metabolic process	oxidoreductase activity; identical protein binding; oxidoreductase activity, acting on CH-OH group of donors; L-xylulose reductase (NADP+) activity; oxidoreductase activity, acting on NAD(P)H, quinone or similar compound as acceptor; carbonyl reductase (NADPH) activity; L-xylulose reductase (NAD+) activity	nucleus; membrane; plasma membrane; microvillus; brush border; extracellular exosome; cytoplasmic microtubule
PDE2A	9.46231e-13	-0.163184	0.013	0.123	3.4633e-08	signal transduction; adenylate cyclase-inhibiting G protein-coupled receptor signaling pathway; calcium ion transmembrane transport; negative regulation of transcription by RNA polymerase II; regulation of mitochondrion organization; positive regulation of inflammatory response; G protein-coupled receptor signaling pathway; positive regulation of gene expression; cellular response to mechanical s…	metal ion binding; nucleotide binding; hydrolase activity; zinc ion binding; protein homodimerization activity; protein binding; cAMP binding; magnesium ion binding; phosphoric diester hydrolase activity; calcium channel activity; 3',5'-cyclic-nucleotide phosphodiesterase activity; cGMP binding; 3',5'-cyclic-AMP phosphodiesterase activity; cGMP-stimulated cyclic-nucleotide phosphodiesterase activ…	nucleus; cytoplasm; membrane; endoplasmic reticulum; mitochondrial inner membrane; Golgi apparatus; mitochondrion; mitochondrial matrix; cytosol; plasma membrane; perinuclear region of cytoplasm; mitochondrial outer membrane; presynaptic membrane
FTL	9.70325e-13	0.194955	0.994	0.991	3.55149e-08	cellular iron ion homeostasis; oxidation-reduction process; iron ion transport; neutrophil degranulation; iron ion homeostasis; intracellular sequestering of iron ion	metal ion binding; protein binding; ferric iron binding; iron ion binding; identical protein binding; ferroxidase activity; ferrous iron binding	cell; membrane; extracellular region; cytoplasm; cytosol; extracellular exosome; azurophil granule lumen; intracellular ferritin complex; autolysosome
LRP1B	1.01595e-12	-0.255931	0.03	0.151	3.71848e-08	endocytosis; receptor-mediated endocytosis; protein transport	calcium ion binding; protein binding	membrane; integral component of membrane; receptor complex
LCOR	1.08319e-12	0.299528	0.765	0.675	3.96459e-08	regulation of transcription by RNA polymerase II	DNA binding; protein binding; DNA-binding transcription factor activity, RNA polymerase II-specific	nucleus; nucleoplasm
HDAC2	1.32402e-12	0.304528	0.919	0.905	4.84604e-08	positive regulation of cell population proliferation; negative regulation of apoptotic process; negative regulation of DNA-binding transcription factor activity; positive regulation of transcription by RNA polymerase II; positive regulation of transcription, DNA-templated; chromatin organization; rhythmic process; circadian regulation of gene expression; histone deacetylation; negative regulation…	RNA binding; hydrolase activity; protein binding; histone deacetylase activity; NAD-dependent histone deacetylase activity (H3-K14 specific); deacetylase activity; chromatin binding; enzyme binding; RNA polymerase II distal enhancer sequence-specific DNA binding; RNA polymerase II proximal promoter sequence-specific DNA binding; RNA polymerase II repressing transcription factor binding; histone d…	nucleus; cytoplasm; nuclear chromatin; nucleoplasm; protein-containing complex; ESC/E(Z) complex; histone deacetylase complex; Sin3 complex; NuRD complex; Sin3-type complex; chromatin; membrane; integral component of membrane
RIMKLA	1.39026e-12	-0.233239	0.126	0.287	5.08849e-08	cellular protein modification process; cellular amino acid biosynthetic process	ATP binding; metal ion binding; nucleotide binding; ligase activity; N-acetyl-L-aspartate-L-glutamate ligase activity	cytoplasm; cytosol
LMO7	1.62647e-12	-0.363342	0.143	0.306	5.95305e-08	protein ubiquitination; regulation of signaling; regulation of cell adhesion; positive regulation of transcription by RNA polymerase II; protein polyubiquitination; post-translational protein modification; cell-cell adhesion	metal ion binding; ubiquitin-protein transferase activity; protein binding; protein C-terminus binding; actinin binding	nucleus; cytoplasm; cell surface; focal adhesion; cytosol; apical plasma membrane; ubiquitin ligase complex; nuclear envelope; nucleoplasm; plasma membrane; cell-cell adherens junction; membrane; integral component of membrane
RCAN3	1.70525e-12	0.174513	0.126	0.046	6.2414e-08	regulation of phosphoprotein phosphatase activity; calcium-mediated signaling; anatomical structure morphogenesis; regulation of calcineurin-NFAT signaling cascade	nucleic acid binding; protein binding; phosphatase binding; RNA binding; troponin I binding; calcium-dependent protein serine/threonine phosphatase regulator activity	cytoplasm
SLC24A2	1.70955e-12	-0.24672	0.156	0.328	6.25712e-08	transmembrane transport; ion transport; potassium ion transport; sodium ion transport; sodium ion transmembrane transport; potassium ion transmembrane transport; calcium ion transport; visual perception; response to stimulus; anion transmembrane transport; cellular calcium ion homeostasis; calcium ion transmembrane transport; long-term synaptic potentiation; long-term synaptic depression; ion tra…	symporter activity; antiporter activity; calcium, potassium:sodium antiporter activity; calcium channel activity; protein dimerization activity	membrane; integral component of membrane; plasma membrane; integral component of plasma membrane; intrinsic component of plasma membrane
GNG3	1.71855e-12	0.461943	0.615	0.543	6.29005e-08	G protein-coupled receptor signaling pathway; signal transduction; activation of MAPK activity; positive regulation of cytosolic calcium ion concentration	GTPase activity; G-protein beta-subunit binding; protein binding	membrane; plasma membrane; heterotrimeric G-protein complex; G-protein beta/gamma-subunit complex; postsynaptic density; dendrite; cell body
MT-ATP6	1.76546e-12	0.303433	0.981	0.987	6.46175e-08	ion transport; ATP synthesis coupled proton transport; ATP biosynthetic process; cristae formation; mitochondrial ATP synthesis coupled proton transport; aging; response to hyperoxia	proton transmembrane transporter activity; protein binding; ATPase activity; proton-transporting ATP synthase activity, rotational mechanism; transmembrane transporter activity	membrane; integral component of membrane; mitochondrial inner membrane; mitochondrion; proton-transporting ATP synthase complex, coupling factor F(o); mitochondrial proton-transporting ATP synthase complex; proton-transporting ATP synthase complex
CHD5	2.00524e-12	-0.271216	0.184	0.357	7.33939e-08	chromatin organization; DNA duplex unwinding; cell differentiation; spermatogenesis; nervous system development; negative regulation of cell population proliferation; histone H4 acetylation; regulation of transcription involved in cell fate commitment; spermatogenesis, exchange of chromosomal proteins; histone H3-K27 trimethylation; cerebral cortex neuron differentiation; positive regulation of s…	metal ion binding; nucleotide binding; ATP binding; hydrolase activity; DNA binding; DNA helicase activity; helicase activity; H3K27me3 modified histone binding	nucleus; nuclear speck; membrane; cytosol; nucleoplasm; heterochromatin; NuRD complex
POU3F1	2.12047e-12	-0.229238	0.079	0.222	7.76115e-08	regulation of transcription, DNA-templated; regulation of transcription by RNA polymerase II; positive regulation of transcription, DNA-templated; brain development; positive regulation of gene expression; axon ensheathment; epidermis development; Schwann cell development; myelination in peripheral nervous system; keratinocyte differentiation; forebrain development; myelination	DNA binding; DNA-binding transcription factor activity; sequence-specific DNA binding; DNA-binding transcription factor activity, RNA polymerase II-specific; transcription coactivator activity	nucleus; nucleoplasm; nuclear chromatin; transcription factor complex
TSHZ3	2.13818e-12	-0.236763	0.066	0.203	7.82595e-08	negative regulation of transcription, DNA-templated; multicellular organism development; regulation of gene expression; regulation of transcription by RNA polymerase II; long-term synaptic potentiation; positive regulation of synaptic transmission, glutamatergic; regulation of respiratory gaseous exchange by nervous system process	nucleic acid binding; metal ion binding; DNA binding; protein binding; chromatin binding; DNA-binding transcription factor activity, RNA polymerase II-specific	nucleus; nucleoplasm; cell projection; nuclear chromatin; growth cone
HINT1	2.29938e-12	0.21176	0.981	0.982	8.41598e-08	apoptotic process; positive regulation of calcium-mediated signaling; signal transduction; regulation of transcription, DNA-templated; intrinsic apoptotic signaling pathway by p53 class mediator; purine ribonucleotide catabolic process	nucleotide binding; hydrolase activity; catalytic activity; protein kinase C binding	nucleus; cytoplasm; cytosol; plasma membrane; extracellular exosome; histone deacetylase complex; cytoskeleton
CDH13	2.36269e-12	-0.281083	0.009	0.112	8.64769e-08	negative regulation of cell population proliferation; positive regulation of cell migration; positive regulation of transcription by RNA polymerase II; regulation of epidermal growth factor receptor signaling pathway; negative regulation of cell adhesion; cell adhesion; homophilic cell adhesion via plasma membrane adhesion molecules; cell-cell adhesion; positive regulation of endothelial cell pro…	metal ion binding; calcium ion binding; protein homodimerization activity; cadherin binding; cytoskeletal protein binding; low-density lipoprotein particle binding; lipoprotein particle binding; adiponectin binding	extracellular space; cytoplasm; membrane; plasma membrane; focal adhesion; anchored component of membrane; cell surface; extracellular exosome; collagen-containing extracellular matrix; cell-cell adherens junction; extracellular region; caveola; neuron projection; catenin complex; external side of plasma membrane; synapse; perinuclear region of cytoplasm; GABA-ergic synapse
VSTM2L	2.70058e-12	-0.233886	0.081	0.222	9.88438e-08	axon guidance; negative regulation of neuron apoptotic process; homophilic cell adhesion via plasma membrane adhesion molecules; dendrite self-avoidance	protein binding; cell-cell adhesion mediator activity	cytoplasm; extracellular region; plasma membrane; axon
METRN	2.7382e-12	0.223089	0.192	0.092	1.00221e-07	signal transduction; multicellular organism development; cell differentiation; nervous system development; glial cell differentiation; positive regulation of axonogenesis	hormone activity	extracellular region; extracellular space
FZD7	2.95315e-12	-0.26853	0.079	0.224	1.08088e-07	negative regulation of cell-substrate adhesion; negative regulation of cardiac muscle cell differentiation; positive regulation of transcription, DNA-templated; signal transduction; cell surface receptor signaling pathway; G protein-coupled receptor signaling pathway; multicellular organism development; Wnt signaling pathway; canonical Wnt signaling pathway; Wnt signaling pathway, planar cell pol…	protein binding; transmembrane signaling receptor activity; G protein-coupled receptor activity; Wnt-activated receptor activity; Wnt-protein binding; phosphatidylinositol-4,5-bisphosphate binding; PDZ domain binding; frizzled binding	membrane; integral component of membrane; plasma membrane; endosome; endosome membrane; recycling endosome membrane
RPS18	3.32109e-12	-0.197766	1	1	1.21555e-07	translation; viral transcription; translational initiation; nuclear-transcribed mRNA catabolic process, nonsense-mediated decay; SRP-dependent cotranslational protein targeting to membrane	nucleic acid binding; RNA binding; structural constituent of ribosome; protein binding; rRNA binding	nucleus; cytoplasm; membrane; cytosol; ribosome; cytosolic small ribosomal subunit; focal adhesion; nucleoplasm; extracellular exosome; postsynaptic density; small ribosomal subunit; intracellular; collagen trimer
FKBP3	3.38112e-12	0.32292	0.788	0.77	1.23752e-07	protein peptidyl-prolyl isomerization	RNA binding; isomerase activity; peptidyl-prolyl cis-trans isomerase activity; protein binding; signaling receptor activity; FK506 binding	nucleus
MIR99AHG	4.50116e-12	0.365142	0.295	0.174	1.64747e-07
PLPPR5	4.86597e-12	-0.217581	0.109	0.263	1.78099e-07	phospholipid metabolic process; phospholipid dephosphorylation; positive regulation of filopodium assembly; positive regulation of neuron projection development	hydrolase activity; phosphatidate phosphatase activity; phosphatase activity; lipid phosphatase activity	membrane; integral component of membrane; plasma membrane; integral component of plasma membrane
CREG1	4.97301e-12	-0.197622	0.13	0.289	1.82017e-07	negative regulation of nucleic acid-templated transcription; regulation of growth; neutrophil degranulation; multicellular organism development; regulation of transcription by RNA polymerase II; regulation of transcription, DNA-templated	cofactor binding; transcription corepressor activity; transcription factor binding	extracellular region; extracellular space; extracellular exosome; azurophil granule lumen; transcription factor complex
CARHSP1	5.57478e-12	0.340721	0.701	0.623	2.04042e-07	regulation of transcription by RNA polymerase II; intracellular signal transduction; regulation of mRNA stability	nucleic acid binding; RNA binding; protein binding; DNA-binding transcription factor activity, RNA polymerase II-specific; phosphatase binding; mRNA 3'-UTR binding	cytoplasm; cytosol; P-body; cytoplasmic exosome (RNase complex); P granule
RPL4	5.63294e-12	-0.21821	0.966	0.983	2.06171e-07	translation; viral transcription; translational initiation; nuclear-transcribed mRNA catabolic process, nonsense-mediated decay; SRP-dependent cotranslational protein targeting to membrane	RNA binding; structural constituent of ribosome; protein binding	nucleus; cytoplasm; membrane; ribosome; nucleolus; focal adhesion; cytosolic large ribosomal subunit; cytosol; extracellular exosome; ribonucleoprotein complex; rough endoplasmic reticulum
DDAH2	5.92506e-12	0.263839	0.889	0.838	2.16863e-07	citrulline metabolic process; arginine catabolic process; positive regulation of nitric oxide biosynthetic process; negative regulation of apoptotic process; regulation of nitric-oxide synthase activity; arginine metabolic process; nitric oxide mediated signal transduction; nitric oxide biosynthetic process	dimethylargininase activity; hydrolase activity; protein binding; catalytic activity; amino acid binding	cytoplasm; cytosol; mitochondrion; microtubule organizing center; extracellular exosome
RAB12	6.07241e-12	-0.201405	0.083	0.223	2.22256e-07	Rab protein signal transduction; protein transport; autophagy; intracellular protein transport; endosome to lysosome transport; cellular protein catabolic process; protein secretion; protein localization to plasma membrane; regulation of exocytosis; vesicle docking involved in exocytosis; cellular response to insulin stimulus; Golgi vesicle fusion to target membrane; positive regulation of macroa…	GTPase activity; GTP binding; nucleotide binding; protein binding; GDP binding	membrane; Golgi apparatus; lysosomal membrane; Golgi membrane; cytoplasmic vesicle; lysosome; endosome; autophagosome; plasma membrane; cytosol; recycling endosome membrane; synaptic vesicle; trans-Golgi network transport vesicle; phagocytic vesicle
TRMT9B	6.18728e-12	-0.261191	0.162	0.323	2.26461e-07	tRNA processing; methylation; tRNA methylation; tRNA modification; tRNA wobble uridine modification	transferase activity; methyltransferase activity; tRNA methyltransferase activity; tRNA (uracil) methyltransferase activity	nucleus; cytoplasm
IGFBP2	6.57753e-12	0.584317	0.897	0.912	2.40744e-07	response to insulin; positive regulation of activated T cell proliferation; cellular protein metabolic process; regulation of growth; negative regulation of canonical Wnt signaling pathway; regulation of insulin-like growth factor receptor signaling pathway; signal transduction; female pregnancy; aging; response to nutrient; response to mechanical stimulus; response to lithium ion; response to es…	insulin-like growth factor binding; protein binding; growth factor binding; insulin-like growth factor I binding; signaling receptor binding; insulin-like growth factor II binding	extracellular region; extracellular space; extracellular exosome; apical plasma membrane; cytoplasmic vesicle
FGF12	8.11471e-12	-0.344543	0.173	0.333	2.97007e-07	fibroblast growth factor receptor signaling pathway; nervous system development; regulation of sodium ion transmembrane transporter activity; signal transduction; cell-cell signaling; cardiac muscle cell action potential involved in contraction; heart development; regulation of sodium ion transmembrane transport; regulation of neuronal action potential; regulation of voltage-gated sodium channel …	growth factor activity; protein binding; sodium channel regulator activity; ion channel binding	nucleus; extracellular space
NIT2	8.72269e-12	-0.184466	0.156	0.327	3.19259e-07	nitrogen compound metabolic process; neutrophil degranulation; glutamine metabolic process; oxaloacetate metabolic process; asparagine metabolic process	hydrolase activity; omega-amidase activity	cytoplasm; centrosome; cytosol; extracellular region; extracellular exosome; specific granule lumen; tertiary granule lumen
CMBL	9.42592e-12	-0.150865	0.017	0.124	3.44998e-07	xenobiotic metabolic process	hydrolase activity	cytoplasm; cytosol; extracellular exosome
TUBA1B	9.65721e-12	0.308687	0.957	0.951	3.53464e-07	microtubule-based process; microtubule cytoskeleton organization; mitotic cell cycle; cytoskeleton-dependent intracellular transport; cell division; cellular response to interleukin-4; cytoskeleton organization	nucleotide binding; GTPase activity; GTP binding; protein binding; structural constituent of cytoskeleton; ubiquitin protein ligase binding; double-stranded RNA binding; structural molecule activity	cytoplasm; microtubule cytoskeleton; cytoskeleton; microtubule; cytoplasmic microtubule; membrane raft
MYO6	9.69697e-12	0.306962	0.697	0.605	3.54919e-07	intracellular protein transport; protein transport; positive regulation of transcription by RNA polymerase II; endocytosis; sensory perception of sound; DNA damage response, signal transduction by p53 class mediator; actin filament-based movement; regulation of secretion; response to drug	ATP binding; actin filament binding; motor activity; nucleotide binding; actin binding; protein binding; calmodulin binding; ADP binding; minus-end directed microfilament motor activity	myosin complex; nucleus; cytoplasm; membrane; Golgi apparatus; cytosol; plasma membrane; cell projection; perinuclear region of cytoplasm; cytoplasmic vesicle; clathrin-coated pit; nucleoplasm; clathrin-coated vesicle; filopodium; extracellular exosome; cell cortex; ruffle membrane; nuclear membrane; microvillus; filamentous actin; unconventional myosin complex; ruffle; clathrin-coated vesicle me…
PSMA7	1.03748e-11	0.258508	0.976	0.974	3.79729e-07	proteolysis; proteolysis involved in cellular protein catabolic process; ubiquitin-dependent protein catabolic process; Fc-epsilon receptor signaling pathway; T cell receptor signaling pathway; MAPK cascade; protein polyubiquitination; stimulatory C-type lectin receptor signaling pathway; antigen processing and presentation of exogenous peptide antigen via MHC class I, TAP-dependent; regulation o…	hydrolase activity; peptidase activity; threonine-type endopeptidase activity; protein binding; endopeptidase activity; identical protein binding	cytoplasm; proteasome complex; proteasome core complex; proteasome core complex, alpha-subunit complex; nucleus; postsynapse; nucleoplasm; cytosol; extracellular exosome
PRKACB	1.05219e-11	-0.283995	0.4	0.595	3.85111e-07	protein phosphorylation; phosphorylation; G protein-coupled receptor signaling pathway; stimulatory C-type lectin receptor signaling pathway; signal transduction; blood coagulation; renal water homeostasis; activation of protein kinase A activity; cellular response to glucagon stimulus; high-density lipoprotein particle assembly; protein kinase A signaling; adenylate cyclase-modulating G protein-…	nucleotide binding; protein kinase activity; protein serine/threonine kinase activity; ATP binding; kinase activity; transferase activity; protein binding; magnesium ion binding; cAMP-dependent protein kinase activity; protein kinase A regulatory subunit binding; ubiquitin protein ligase binding	nucleus; cytoplasm; membrane; cytosol; intercellular bridge; plasma membrane; centrosome; nucleoplasm; extracellular exosome; ciliary base; cAMP-dependent protein kinase complex; perinuclear region of cytoplasm
DOCK9	1.06831e-11	-0.244946	0.122	0.275	3.91013e-07	small GTPase mediated signal transduction; positive regulation of GTPase activity; blood coagulation	guanyl-nucleotide exchange factor activity; protein binding; cadherin binding	membrane; cytosol; endomembrane system
ARG2	1.12622e-11	-0.290573	0.335	0.509	4.12207e-07	urea cycle; ureteric bud development; negative regulation of type 2 immune response; arginine metabolic process; striated muscle contraction; regulation of interleukin-1 beta secretion; negative regulation of macrophage inflammatory protein 1 alpha production; negative regulation of chemokine (C-C motif) ligand 4 production; negative regulation of chemokine (C-C motif) ligand 5 production; negati…	metal ion binding; hydrolase activity; hydrolase activity, acting on carbon-nitrogen (but not peptide) bonds, in linear amidines; arginase activity; manganese ion binding	mitochondrion; cytoplasm; mitochondrial matrix
C9orf16	1.1496e-11	0.315651	0.88	0.873	4.20766e-07		protein binding
NPPA	1.15735e-11	0.319925	0.16	0.072	4.23602e-07	positive regulation of heart rate; positive regulation of cardiac muscle contraction; regulation of calcium ion transmembrane transport via high voltage-gated calcium channel; positive regulation of potassium ion export across plasma membrane; cellular protein metabolic process; regulation of blood pressure; regulation of cardiac conduction; female pregnancy; transcription initiation from RNA pol…	protein binding; hormone activity; signaling receptor binding; neuropeptide hormone activity; hormone receptor binding; neuropeptide receptor binding	extracellular region; extracellular space; nucleus; cytoplasm; collagen-containing extracellular matrix; protein-containing complex; mast cell granule; perinuclear region of cytoplasm
NRXN2	1.27265e-11	-0.284899	0.372	0.554	4.65803e-07	cell adhesion; signal transduction; neuron cell-cell adhesion; neurotransmitter secretion; chemical synaptic transmission; synapse assembly; social behavior; adult behavior; vocalization behavior; postsynaptic membrane assembly; gephyrin clustering involved in postsynaptic density assembly; neuroligin clustering involved in postsynaptic membrane assembly; postsynaptic density protein 95 clusterin…	cell adhesion molecule binding; transmembrane signaling receptor activity; neuroligin family protein binding; metal ion binding; calcium channel regulator activity	membrane; integral component of membrane; plasma membrane; presynapse
RIPOR2	1.39006e-11	0.328388	0.415	0.285	5.08775e-07	cell adhesion; negative regulation of cell adhesion; sensory perception of sound; negative regulation of Rho protein signal transduction; establishment of protein localization; skeletal muscle fiber development; protein homooligomerization; positive regulation of filopodium assembly; auditory receptor cell stereocilium organization; cellular response to mechanical stimulus; positive regulation of…	identical protein binding; protein binding; 14-3-3 protein binding	cytoplasm; membrane; apical plasma membrane; stereocilium; stereocilium membrane; plasma membrane; cytoskeleton; cell projection; filopodium
ATP8A2	1.39063e-11	-0.326832	0.312	0.484	5.08985e-07	lipid transport; phospholipid transport; negative regulation of cell population proliferation; phospholipid translocation; aminophospholipid translocation; neuron development; involuntary skeletal muscle contraction; axonogenesis; aging; retina layer formation; positive regulation of neuron projection development; response to auditory stimulus; neuron projection development; positive regulation o…	metal ion binding; nucleotide binding; ATP binding; magnesium ion binding; ATPase-coupled intramembrane lipid transporter activity; aminophospholipid flippase activity	membrane; integral component of membrane; nucleoplasm; Golgi apparatus; plasma membrane; cell projection; endosome; photoreceptor outer segment; trans-Golgi network
CXXC5	1.45233e-11	0.425468	0.404	0.296	5.31567e-07	negative regulation of transcription by RNA polymerase II; positive regulation of I-kappaB kinase/NF-kappaB signaling	zinc ion binding; metal ion binding; DNA binding; sequence-specific DNA binding; protein binding; transcription factor binding	nucleus; cytoplasm; cytosol; nucleoplasm
PCOLCE2	1.47631e-11	-0.195869	0.041	0.158	5.40343e-07	positive regulation of peptidase activity; cellular response to leukemia inhibitory factor	heparin binding; collagen binding; peptidase activator activity; protein binding	extracellular region
NXN	1.4883e-11	0.205735	0.216	0.11	5.44732e-07	oxidation-reduction process; cell redox homeostasis; multicellular organism development; Wnt signaling pathway; cell differentiation; cellular oxidant detoxification; negative regulation of Wnt signaling pathway; negative regulation of protein ubiquitination; cardiovascular system development; in utero embryonic development	oxidoreductase activity; protein-disulfide reductase activity; thioredoxin-disulfide reductase activity	nucleus; cytoplasm; cytosol; cell
MARCKSL1	1.51043e-11	0.187209	0.991	0.992	5.52834e-07	positive regulation of cell population proliferation	actin binding; protein binding; calmodulin binding	cytoplasm; membrane; plasma membrane; cytoskeleton; extracellular exosome
SSTR2	1.58121e-11	-0.296432	0.41	0.607	5.78739e-07	G protein-coupled receptor signaling pathway; signal transduction; negative regulation of cell population proliferation; neuropeptide signaling pathway; G protein-coupled receptor signaling pathway, coupled to cyclic nucleotide second messenger; cellular response to glucocorticoid stimulus; somatostatin signaling pathway; cellular response to estradiol stimulus; regulation of muscle contraction; …	G protein-coupled receptor activity; protein binding; PDZ domain binding; peptide binding; somatostatin receptor activity; neuropeptide binding	cytoplasm; membrane; integral component of membrane; cytosol; plasma membrane; integral component of plasma membrane
SLC26A4-AS1	1.72837e-11	-0.172613	0.006	0.102	6.32599e-07
MAL2	1.85758e-11	-0.211697	0.015	0.116	6.79892e-07	transcytosis; myelination	protein binding; structural constituent of myelin sheath	membrane; integral component of membrane; membrane raft; cytoplasm; plasma membrane; perinuclear region of cytoplasm; extracellular exosome; endomembrane system; apical plasma membrane
COL6A1	1.94268e-11	0.291929	0.346	0.229	7.1104e-07	cell adhesion; cellular response to amino acid stimulus; growth plate cartilage chondrocyte morphogenesis; extracellular matrix organization; osteoblast differentiation; endodermal cell differentiation	extracellular matrix structural constituent conferring tensile strength; collagen binding; platelet-derived growth factor binding	membrane; lysosomal membrane; extracellular region; collagen trimer; extracellular space; extracellular matrix; sarcolemma; extracellular exosome; collagen-containing extracellular matrix; protein-containing complex; endoplasmic reticulum lumen; collagen type VI trimer
AFF3	2.12808e-11	-0.305848	0.464	0.663	7.78899e-07	regulation of transcription, DNA-templated; embryonic hindlimb morphogenesis; response to tumor necrosis factor	DNA binding; DNA-binding transcription factor activity; double-stranded DNA binding	nucleus; cytosol; nucleoplasm; nuclear body; transcription elongation factor complex; ELL-EAF complex
SIPA1L1	2.22445e-11	-0.233415	0.098	0.238	8.14172e-07	actin cytoskeleton reorganization; regulation of GTPase activity; regulation of small GTPase mediated signal transduction; activation of GTPase activity; regulation of dendrite morphogenesis; regulation of synaptic plasticity; ephrin receptor signaling pathway; regulation of axonogenesis; regulation of dendritic spine morphogenesis; positive regulation of GTPase activity	GTPase activator activity; protein binding; ephrin receptor binding	cytoplasm; membrane; plasma membrane; cytoskeleton; cell junction; synapse; postsynaptic membrane; postsynaptic density; dendritic spine; neuron projection
WWC1	2.29432e-11	-0.196801	0.079	0.216	8.39744e-07	cell migration; positive regulation of MAPK cascade; negative regulation of transcription by RNA polymerase II; hippo signaling; negative regulation of organ growth; regulation of hippo signaling; positive regulation of transcription of Notch receptor target; establishment of cell polarity; negative regulation of hippo signaling; regulation of intracellular transport	transcription coactivator activity; protein binding; molecular adaptor activity; kinase binding	nucleus; cytoplasm; membrane; plasma membrane; cell projection; perinuclear region of cytoplasm; cytosol; ruffle membrane; protein-containing complex
EPHA4	2.31592e-11	-0.385086	0.359	0.531	8.47648e-07	protein phosphorylation; phosphorylation; transmembrane receptor protein tyrosine kinase signaling pathway; peptidyl-tyrosine phosphorylation; ephrin receptor signaling pathway; cellular response to amyloid-beta; positive regulation of amyloid-beta formation; negative regulation of long-term synaptic potentiation; negative regulation of neuron projection development; cell adhesion; multicellular …	nucleotide binding; protein kinase activity; ATP binding; kinase activity; transferase activity; protein tyrosine kinase activity; transmembrane receptor protein tyrosine kinase activity; ephrin receptor activity; protein binding; amyloid-beta binding; transmembrane-ephrin receptor activity; GPI-linked ephrin receptor activity; protein tyrosine kinase binding; PH domain binding; DH domain binding…	membrane; integral component of membrane; integral component of plasma membrane; plasma membrane; cytoplasm; cell projection; cell junction; synapse; postsynaptic membrane; dendrite; endosome; early endosome; receptor complex; axon; neuron projection; early endosome membrane; adherens junction; postsynaptic density; dendritic spine; dendritic shaft; mitochondrial outer membrane; endoplasmic retic…
PRKCE	2.43875e-11	-0.190707	0.073	0.206	8.92608e-07	protein phosphorylation; phosphorylation; intracellular signal transduction; cell adhesion; cell division; positive regulation of catalytic activity; cell cycle; immune system process; Fc-gamma receptor signaling pathway involved in phagocytosis; peptidyl-serine phosphorylation; macrophage activation involved in immune response; positive regulation of fibroblast migration; positive regulation of …	metal ion binding; nucleotide binding; protein kinase activity; protein serine/threonine kinase activity; ATP binding; kinase activity; transferase activity; protein binding; protein kinase C activity; actin monomer binding; calcium-independent protein kinase C activity; signaling receptor activator activity; ethanol binding; 14-3-3 protein binding; enzyme binding; enzyme activator activity	nucleus; cytoplasm; membrane; Golgi apparatus; cytosol; plasma membrane; cytoskeleton; perinuclear region of cytoplasm; cell periphery; mitochondrion; endoplasmic reticulum
SESN3	2.67133e-11	-0.243225	0.132	0.284	9.77733e-07	oxidation-reduction process; regulation of response to reactive oxygen species; negative regulation of TORC1 signaling; cellular response to glucose starvation; cellular response to amino acid stimulus; cellular response to amino acid starvation; positive regulation of macroautophagy; cellular response to leucine; cellular response to leucine starvation; response to insulin; TORC2 signaling; gluc…	oxidoreductase activity; protein binding; oxidoreductase activity, acting on peroxide as acceptor; leucine binding	nucleus; cytoplasm; GATOR2 complex; TORC2 complex
CPNE1	2.67478e-11	0.272504	0.325	0.208	9.78997e-07	proteolysis; cell differentiation; neutrophil degranulation; negative regulation of gene expression; cellular response to calcium ion; lipid metabolic process; positive regulation of protein kinase B signaling; regulation of I-kappaB kinase/NF-kappaB signaling; negative regulation of NIK/NF-kappaB signaling; vesicle-mediated transport; glycerophospholipid biosynthetic process; negative regulation…	protein homodimerization activity; calcium ion binding; protein binding; calcium-dependent phospholipid binding; endopeptidase activity; NF-kappaB binding; transporter activity; phosphatidylserine binding	nucleus; cytoplasm; membrane; nucleoplasm; nuclear membrane; cytosol; plasma membrane; extracellular exosome; azurophil granule membrane
DYNLL1	2.72527e-11	-0.224354	0.957	0.98	9.97476e-07	regulation of catalytic activity; apoptotic process; microtubule-based process; intraciliary transport involved in cilium assembly; viral process; G2/M transition of mitotic cell cycle; regulation of G2/M transition of mitotic cell cycle; ciliary basal body-plasma membrane docking; neutrophil degranulation; substantia nigra development; antigen processing and presentation of exogenous peptide ant…	motor activity; protein binding; dynein light intermediate chain binding; ATP-dependent microtubule motor activity, plus-end-directed; dynein intermediate chain binding	nucleus; cytoplasm; membrane; mitochondrion; cytoskeleton; microtubule; centrosome; microtubule organizing center; dynein complex; plasma membrane; kinetochore; cytoplasmic dynein complex; cilium; ciliary tip; cytosol; COP9 signalosome; tertiary granule membrane; mitotic spindle; ficolin-1-rich granule membrane; microtubule associated complex
GDI2	2.86089e-11	0.303753	0.665	0.585	1.04712e-06	protein transport; small GTPase mediated signal transduction; regulation of catalytic activity; positive regulation of GTPase activity; signal transduction; vesicle-mediated transport; regulation of small GTPase mediated signal transduction; neutrophil degranulation	RNA binding; protein binding; GTPase activator activity; Rab GTPase binding; GDP-dissociation inhibitor activity; Rab GDP-dissociation inhibitor activity; small GTPase binding	cytoplasm; membrane; focal adhesion; extracellular region; cytosol; extracellular exosome; secretory granule lumen; vesicle; azurophil granule lumen; Golgi apparatus; synapse
RPL31	2.98421e-11	-0.217075	0.979	0.986	1.09225e-06	translation; cytoplasmic translation; viral transcription; translational initiation; nuclear-transcribed mRNA catabolic process, nonsense-mediated decay; SRP-dependent cotranslational protein targeting to membrane	RNA binding; structural constituent of ribosome; protein binding	membrane; ribosome; focal adhesion; cytosolic large ribosomal subunit; cytosol; extracellular exosome; polysomal ribosome; intracellular
MT-ND3	3.11649e-11	0.257872	0.97	0.974	1.14067e-06	oxidation-reduction process; mitochondrial electron transport, NADH to ubiquinone; mitochondrial respiratory chain complex I assembly; response to oxidative stress; response to light intensity; response to hormone; cellular response to glucocorticoid stimulus	protein binding; NADH dehydrogenase (ubiquinone) activity	membrane; integral component of membrane; mitochondrion; respirasome; mitochondrial membrane; mitochondrial respiratory chain complex I; mitochondrial inner membrane
TMEM170A	3.13057e-11	0.224798	0.205	0.107	1.14582e-06	nuclear envelope organization; endoplasmic reticulum tubular network organization; nuclear pore complex assembly	protein binding	nucleus; membrane; integral component of membrane; endoplasmic reticulum; endoplasmic reticulum membrane; nuclear envelope
FANCL	3.23268e-11	-0.231262	0.226	0.401	1.18319e-06	protein ubiquitination; interstrand cross-link repair; DNA repair; cellular response to DNA damage stimulus; protein monoubiquitination; gamete generation; regulation of cell population proliferation	ubiquitin-protein transferase activity; metal ion binding; transferase activity; protein binding; ubiquitin protein ligase binding; ubiquitin protein ligase activity	intracellular membrane-bounded organelle; nuclear body; Fanconi anaemia nuclear complex; nucleus; cytoplasm; nucleoplasm; nuclear envelope
TGFBR1	3.45458e-11	0.281947	0.284	0.173	1.26441e-06	transmembrane receptor protein serine/threonine kinase signaling pathway; protein phosphorylation; positive regulation of gene expression; transforming growth factor beta receptor signaling pathway; positive regulation of epithelial to mesenchymal transition; positive regulation of protein kinase B signaling; positive regulation of cell migration; ventricular septum morphogenesis; positive regula…	ATP binding; transmembrane receptor protein serine/threonine kinase activity; metal ion binding; nucleotide binding; protein kinase activity; protein serine/threonine kinase activity; kinase activity; transferase activity; protein binding; transforming growth factor beta receptor activity, type I; transforming growth factor beta binding; SMAD binding; I-SMAD binding; activin binding; type II tran…	membrane; integral component of membrane; intracellular membrane-bounded organelle; plasma membrane; nucleus; cell; cell junction; membrane raft; cell surface; endosome; receptor complex; bicellular tight junction; activin receptor complex
PSMD14	3.48709e-11	0.35837	0.739	0.701	1.27631e-06	proteolysis; DNA repair; cellular response to DNA damage stimulus; ubiquitin-dependent protein catabolic process; Fc-epsilon receptor signaling pathway; T cell receptor signaling pathway; response to ethanol; protein K63-linked deubiquitination; MAPK cascade; protein polyubiquitination; stimulatory C-type lectin receptor signaling pathway; antigen processing and presentation of exogenous peptide …	metal ion binding; hydrolase activity; protein binding; peptidase activity; thiol-dependent ubiquitinyl hydrolase activity; metallopeptidase activity; Lys63-specific deubiquitinase activity; thiol-dependent ubiquitin-specific protease activity; endopeptidase activator activity; proteasome binding	nucleus; proteasome complex; extracellular region; proteasome accessory complex; cytosolic proteasome complex; nucleoplasm; cytosol; proteasome regulatory particle, lid subcomplex; secretory granule lumen; ficolin-1-rich granule lumen
SLC25A6	3.75517e-11	0.32536	0.859	0.827	1.37443e-06	transmembrane transport; apoptotic process; viral process; regulation of insulin secretion; ADP transport; ATP transport; protein targeting to mitochondrion	transmembrane transporter activity; protein binding; ATP:ADP antiporter activity	nucleus; membrane; integral component of membrane; mitochondrion; mitochondrial inner membrane; TIM23 mitochondrial import inner membrane translocase complex
PRMT1	4.00583e-11	0.276235	0.784	0.74	1.46617e-06	methylation; protein methylation; positive regulation of erythrocyte differentiation; positive regulation of p38MAPK cascade; DNA damage response, signal transduction by p53 class mediator resulting in cell cycle arrest; protein homooligomerization; positive regulation of cell population proliferation; cell surface receptor signaling pathway; neuron projection development; regulation of megakaryo…	transferase activity; methyltransferase activity; RNA binding; protein binding; histone methyltransferase activity (H4-R3 specific); identical protein binding; enzyme binding; methyl-CpG binding; histone methyltransferase activity; protein-arginine N-methyltransferase activity; mitogen-activated protein kinase p38 binding; S-adenosyl-L-methionine binding; protein methyltransferase activity; prote…	nucleus; cytoplasm; cytosol; nucleoplasm; methylosome
CHD4	4.36974e-11	0.316467	0.705	0.652	1.59937e-06	chromatin organization; DNA duplex unwinding; regulation of signal transduction by p53 class mediator; regulation of transcription by RNA polymerase II; ATP-dependent chromatin remodeling	metal ion binding; ATP binding; RNA polymerase II repressing transcription factor binding; histone deacetylase binding; nucleotide binding; hydrolase activity; DNA binding; protein binding; DNA helicase activity; helicase activity; RNA polymerase II distal enhancer sequence-specific DNA binding; RNA polymerase II proximal promoter sequence-specific DNA binding; zinc ion binding; nucleosomal DNA b…	nucleus; NuRD complex; cytoplasm; membrane; nuclear chromatin; cytoskeleton; nucleoplasm; centrosome; microtubule organizing center; protein-containing complex
ANKRD33B	4.86816e-11	-0.198731	0.1	0.24	1.7818e-06		protein binding
COG5	4.93476e-11	-0.199043	0.1	0.242	1.80617e-06	protein transport; intra-Golgi vesicle-mediated transport; endoplasmic reticulum to Golgi vesicle-mediated transport	protein binding	cytoplasm; membrane; Golgi apparatus; nucleoplasm; cytosol; Golgi membrane; Golgi transport complex; trans-Golgi network membrane
ZNF467	5.00262e-11	-0.183934	0.113	0.26	1.83101e-06	regulation of transcription, DNA-templated	nucleic acid binding; metal ion binding; DNA binding	nucleus
HIGD2A	5.32462e-11	0.335301	0.594	0.502	1.94886e-06	oxidation-reduction process; negative regulation of apoptotic process		membrane; integral component of membrane; mitochondrial inner membrane; mitochondrion; respirasome; mitochondrial membrane
ING2	5.79033e-11	-0.257341	0.214	0.378	2.11932e-06	regulation of apoptotic process; chromatin organization; negative regulation of cell population proliferation; positive regulation of transcription, DNA-templated; regulation of growth; regulation of cellular senescence; signal transduction; regulation of transcription, DNA-templated; positive regulation of transforming growth factor beta receptor signaling pathway; negative regulation of intrins…	metal ion binding; DNA binding; protein binding; chromatin binding; phosphatidylinositol binding; protein-containing complex binding; methylated histone binding	nucleus; Golgi apparatus; cytosol; nucleoplasm; plasma membrane; CCAAT-binding factor complex; Sin3 complex
ARHGEF12	6.69987e-11	-0.235877	0.282	0.455	2.45222e-06	G protein-coupled receptor signaling pathway; intracellular signal transduction; regulation of Rho protein signal transduction; positive regulation of GTPase activity; Rho protein signal transduction; regulation of small GTPase mediated signal transduction; positive regulation of apoptotic process	G protein-coupled receptor binding; guanyl-nucleotide exchange factor activity; Rho guanyl-nucleotide exchange factor activity; GTPase activator activity; protein binding	cytoplasm; membrane; cytosol; extracellular exosome
SYBU	6.86846e-11	-0.220573	0.156	0.314	2.51392e-06	axonal transport of mitochondrion; positive regulation of insulin secretion involved in cellular response to glucose stimulus; regulation of synaptic activity; synapse maturation; regulation of insulin secretion involved in cellular response to glucose stimulus; anterograde neuronal dense core vesicle transport	protein binding; kinesin binding; syntaxin-1 binding; microtubule binding	cytoplasm; membrane; integral component of membrane; intracellular membrane-bounded organelle; Golgi apparatus; axon cytoplasm; cytoskeleton; Golgi membrane; cytoplasmic vesicle; microtubule; vesicle; dense body
HIVEP2	7.59095e-11	-0.279351	0.173	0.327	2.77836e-06	regulation of transcription by RNA polymerase II	nucleic acid binding; metal ion binding; DNA binding; DNA-binding transcription factor activity, RNA polymerase II-specific	nucleus; nucleoplasm
NREP	7.59177e-11	0.307016	0.938	0.924	2.77866e-06	regulation of neuron differentiation; axon regeneration; regulation of transforming growth factor beta receptor signaling pathway	protein binding	cytoplasm; nucleus
IFI6	7.85406e-11	-0.223113	0.118	0.259	2.87467e-06	negative regulation of apoptotic process; apoptotic process; immune system process; innate immune response; defense response to virus; cellular response to virus; negative regulation of extrinsic apoptotic signaling pathway in absence of ligand; immune response; intrinsic apoptotic signaling pathway; type I interferon signaling pathway; negative regulation of cysteine-type endopeptidase activity …	protein binding	membrane; integral component of membrane; mitochondrial inner membrane; mitochondrion; plasma membrane; mitochondrial membrane
GNAI2	7.93397e-11	0.320564	0.737	0.71	2.90391e-06	positive regulation of cell population proliferation; G protein-coupled receptor signaling pathway; signal transduction; cell division; cell cycle; adenylate cyclase-modulating G protein-coupled receptor signaling pathway; protein folding; adenylate cyclase-inhibiting G protein-coupled receptor signaling pathway; response to nutrient; negative regulation of adenylate cyclase activity; gamma-amino…	metal ion binding; nucleotide binding; GTPase activity; GTP binding; protein binding; guanyl nucleotide binding; G-protein beta/gamma-subunit complex binding; G protein-coupled receptor binding	cytoplasm; membrane; cytosol; nucleoplasm; plasma membrane; cytoskeleton; heterotrimeric G-protein complex; centrosome; microtubule organizing center; midbody; extracellular exosome; extracellular vesicle; nucleus; dendrite; cell body; membrane raft
MIF	8.47691e-11	-0.25435	0.974	0.987	3.10263e-06	negative regulation of cell migration; negative regulation of gene expression; positive regulation of ERK1 and ERK2 cascade; positive regulation of fibroblast proliferation; negative regulation of apoptotic process; inflammatory response; immune system process; innate immune response; leukocyte migration; positive chemotaxis; cell population proliferation; neutrophil degranulation; positive regul…	isomerase activity; protein binding; cytokine activity; identical protein binding; protease binding; phenylpyruvate tautomerase activity; signaling receptor binding; chemoattractant activity; dopachrome isomerase activity; cytokine receptor binding	extracellular space; cytoplasm; plasma membrane; cytosol; nucleoplasm; extracellular region; extracellular exosome; cell surface; secretory granule lumen; ficolin-1-rich granule lumen; vesicle
PRKAG2	9.90168e-11	-0.214689	0.135	0.281	3.62411e-06	negative regulation of protein kinase activity; phosphorylation; protein phosphorylation; lipid metabolic process; fatty acid metabolic process; fatty acid biosynthetic process; regulation of protein serine/threonine kinase activity; negative regulation of protein serine/threonine kinase activity; regulation of catalytic activity; activation of protein kinase activity; regulation of signal transd…	nucleotide binding; ATP binding; kinase activity; adenyl ribonucleotide binding; AMP-activated protein kinase activity; AMP binding; protein kinase binding; ADP binding; cAMP-dependent protein kinase inhibitor activity; cAMP-dependent protein kinase regulator activity; protein kinase activator activity; phosphorylase kinase regulator activity	extracellular space; nucleotide-activated protein kinase complex; nucleoplasm; cytosol; membrane; integral component of membrane
TAGLN3	1.03434e-10	0.309999	0.876	0.879	3.7858e-06	central nervous system development; negative regulation of transcription by RNA polymerase II	protein binding; actin filament binding	nucleus
ABHD6	1.07072e-10	-0.222209	0.184	0.339	3.91893e-06	lipid metabolic process; negative regulation of cold-induced thermogenesis; monoacylglycerol catabolic process; acylglycerol catabolic process; lysobisphosphatidic acid metabolic process; phospholipid catabolic process; negative regulation of cell migration; positive regulation of lipid biosynthetic process; long-term synaptic depression; regulation of endocannabinoid signaling pathway	hydrolase activity; catalytic activity; acylglycerol lipase activity; phospholipase activity	membrane; integral component of membrane; mitochondrion; lysosomal membrane; lysosome; plasma membrane; endosome; late endosome membrane; mitochondrial membrane; AMPA glutamate receptor complex; glutamatergic synapse; GABA-ergic synapse; integral component of postsynaptic membrane
SDK1	1.07721e-10	-0.219801	0.066	0.188	3.94269e-06	cell adhesion; retina layer formation; homophilic cell adhesion via plasma membrane adhesion molecules; synapse assembly; cell-cell junction organization; behavioral response to cocaine; regulation of dendritic spine development	identical protein binding; protein binding	membrane; integral component of membrane; plasma membrane; cell junction; synapse
POLD2	1.08103e-10	-0.217026	0.363	0.55	3.95669e-06	DNA repair; cellular response to DNA damage stimulus; DNA replication; translesion synthesis; transcription-coupled nucleotide-excision repair; DNA damage response, detection of DNA damage; nucleotide-excision repair, DNA incision, 5'-to lesion; nucleotide-excision repair, DNA incision; telomere maintenance via semi-conservative replication; nucleotide-excision repair, DNA gap filling; telomere m…	DNA binding; protein binding; DNA-directed DNA polymerase activity	nucleus; nucleoplasm; delta DNA polymerase complex; zeta DNA polymerase complex
GMDS	1.08839e-10	-0.143889	0.032	0.14	3.98361e-06	Notch signaling pathway; GDP-mannose metabolic process; 'de novo' GDP-L-fucose biosynthetic process	lyase activity; protein binding; identical protein binding; GDP-mannose 4,6-dehydratase activity; NADP+ binding	cytoplasm; cytosol; extracellular exosome
ATP6V1F	1.14924e-10	-0.221446	0.833	0.902	4.20633e-06	proton transmembrane transport; ion transport; ion transmembrane transport; insulin receptor signaling pathway; transferrin transport; phagosome acidification	proton-transporting ATPase activity, rotational mechanism; protein binding; ATPase activity; proton transmembrane transporter activity; ATPase-coupled ion transmembrane transporter activity	membrane; proton-transporting V-type ATPase, V1 domain; cytosol; extracellular exosome; vacuolar proton-transporting V-type ATPase complex; proton-transporting two-sector ATPase complex
ATP6V1G1	1.23533e-10	0.228144	0.944	0.94	4.52142e-06	proton transmembrane transport; ion transport; cellular iron ion homeostasis; ion transmembrane transport; insulin receptor signaling pathway; regulation of macroautophagy; transferrin transport; phagosome acidification; cellular response to increased oxygen levels	protein binding; ATPase-coupled transmembrane transporter activity; proton-exporting ATPase activity, phosphorylative mechanism; ATPase activity; ATPase binding	lysosomal membrane; cytosol; plasma membrane; vacuolar proton-transporting V-type ATPase complex; extracellular exosome
TMEM59L	1.24373e-10	-0.252796	0.487	0.676	4.55217e-06			membrane; integral component of membrane; Golgi apparatus; Golgi membrane
KLC1	1.27487e-10	0.281429	0.912	0.89	4.66616e-06	retrograde vesicle-mediated transport, Golgi to endoplasmic reticulum; viral process; microtubule-based movement; antigen processing and presentation of exogenous peptide antigen via MHC class II; stress granule disassembly	microtubule motor activity; protein binding; motor activity	cytoplasm; membrane; kinesin complex; cytoskeleton; cell projection; cytoplasmic vesicle; microtubule; cytosol; growth cone
DYNLL2	1.43574e-10	0.301379	0.5	0.394	5.25493e-06	microtubule-based process; intraciliary transport involved in cilium assembly; antigen processing and presentation of exogenous peptide antigen via MHC class II; endoplasmic reticulum to Golgi vesicle-mediated transport; positive regulation of ATP-dependent microtubule motor activity, plus-end-directed; macroautophagy	motor activity; protein binding; dynein light intermediate chain binding; ATP-dependent microtubule motor activity, plus-end-directed; dynein intermediate chain binding; protein homodimerization activity; protein heterodimerization activity; scaffold protein binding	nucleus; cytoplasm; membrane; cytoskeleton; microtubule; centrosome; dynein complex; plasma membrane; cilium; ciliary tip; cytosol; glutamatergic synapse; cytoplasmic dynein complex; postsynapse; microtubule associated complex; postsynaptic density; myosin V complex
SHISAL1	1.45466e-10	-0.141633	0.034	0.141	5.32419e-06			membrane; integral component of membrane
TMEM35A	1.53762e-10	-0.261619	0.534	0.704	5.62784e-06			membrane; integral component of membrane; cytoplasmic vesicle; peroxisome; peroxisomal membrane
RPL26	1.54707e-10	-0.16885	1	1	5.66245e-06	translation; cytoplasmic translation; rRNA processing; viral transcription; ribosomal large subunit biogenesis; translational initiation; nuclear-transcribed mRNA catabolic process, nonsense-mediated decay; SRP-dependent cotranslational protein targeting to membrane; cellular response to gamma radiation; DNA damage response, signal transduction by p53 class mediator resulting in cell cycle arrest…	RNA binding; structural constituent of ribosome; protein binding; mRNA 5'-UTR binding	membrane; ribosome; large ribosomal subunit; cytosolic large ribosomal subunit; cytosol; extracellular exosome; cytoplasm; nucleoplasm; nucleolus; cytosolic ribosome; ribonucleoprotein complex; intracellular
LIN7A	1.56678e-10	-0.254285	0.274	0.443	5.73458e-06	protein transport; exocytosis; protein-containing complex assembly; neurotransmitter secretion; maintenance of epithelial cell apical/basal polarity; synaptic vesicle transport; inner ear development; protein localization to basolateral plasma membrane	protein binding; L27 domain binding	membrane; presynapse; plasma membrane; cell junction; synapse; postsynaptic membrane; bicellular tight junction; extracellular exosome; basolateral plasma membrane; cell-cell junction; postsynaptic density; neuron projection; MPP7-DLG1-LIN7 complex
RIC3	1.59222e-10	-0.23103	0.179	0.338	5.82767e-06	synaptic transmission, cholinergic; protein folding; protein localization to cell surface; positive regulation of cytosolic calcium ion concentration; cellular protein-containing complex assembly	acetylcholine receptor binding; protein folding chaperone	membrane; integral component of membrane; endoplasmic reticulum; endoplasmic reticulum membrane; Golgi apparatus; Golgi membrane; intracellular membrane-bounded organelle; neuron projection; neuronal cell body
WASF3	1.65138e-10	-0.178421	0.15	0.308	6.04421e-06	actin cytoskeleton organization; cytoskeleton organization; regulation of cell shape; protein-containing complex assembly; oligodendrocyte development; lamellipodium assembly; positive regulation of myelination; modification of postsynaptic actin cytoskeleton; actin filament polymerization	actin binding	cytoskeleton; cytoplasm; extracellular exosome; lamellipodium; postsynapse; glutamatergic synapse
ZNF827	1.69179e-10	0.281145	0.425	0.31	6.19211e-06	regulation of gene expression	nucleic acid binding; metal ion binding; DNA binding; protein binding; RNA polymerase II core promoter sequence-specific DNA binding	nucleus; histone methyltransferase complex
RAB33A	1.77919e-10	-0.205862	0.265	0.446	6.512e-06	Rab protein signal transduction; intracellular protein transport; antigen processing and presentation	nucleotide binding; GTPase activity; GTP binding; protein binding	membrane; plasma membrane; Golgi membrane
INKA2	1.86362e-10	0.147165	0.132	0.056	6.82103e-06	negative regulation of protein serine/threonine kinase activity	protein kinase binding; protein serine/threonine kinase inhibitor activity	nucleus
MCUR1	1.8903e-10	-0.238842	0.327	0.493	6.9187e-06	ion transport; calcium ion transport; mitochondrial calcium ion transmembrane transport; calcium ion import; positive regulation of mitochondrial calcium ion concentration; calcium import into the mitochondrion	protein binding	membrane; integral component of membrane; mitochondrial inner membrane; mitochondrion; integral component of mitochondrial inner membrane
BEX1	1.91251e-10	-0.242779	0.9	0.944	6.99998e-06	positive regulation of DNA-binding transcription factor activity; positive regulation of transcription by RNA polymerase II; multicellular organism development; cell differentiation; nervous system development	protein binding; RNA polymerase II activating transcription factor binding	nucleus; cytoplasm; transcription factor complex
LAMC1	2.00054e-10	0.232385	0.226	0.124	7.32218e-06	cell adhesion; animal organ morphogenesis; tissue development; cellular protein metabolic process; cell migration; substrate adhesion-dependent cell spreading; post-translational protein modification; extracellular matrix organization; endoderm development; protein-containing complex assembly; positive regulation of epithelial cell proliferation; extracellular matrix disassembly; hemidesmosome as…	extracellular matrix structural constituent; extracellular matrix constituent conferring elasticity	extracellular space; extracellular region; basement membrane; extracellular exosome; collagen-containing extracellular matrix; endoplasmic reticulum lumen; laminin-10 complex; laminin-11 complex; laminin-1 complex; extracellular matrix
FAM181B	2.20172e-10	-0.223506	0.053	0.169	8.05851e-06
RMRP	2.2351e-10	-0.383928	0.218	0.367	8.1807e-06	;	;	;
SRGAP1	2.28285e-10	-0.291321	0.733	0.856	8.35546e-06	signal transduction; positive regulation of GTPase activity; regulation of small GTPase mediated signal transduction; negative regulation of cell migration	GTPase activator activity; protein binding; Rac GTPase binding	cytoplasm; cytosol
EML6	2.31186e-10	0.206345	0.152	0.07	8.46164e-06		microtubule binding; protein binding	cytoplasm; cytoskeleton; microtubule
LITAF	2.35465e-10	0.153038	0.1	0.037	8.61824e-06	positive regulation of transcription by RNA polymerase II; positive regulation of I-kappaB kinase/NF-kappaB signaling; regulation of transcription by RNA polymerase II; regulation of cytokine production; aging; response to lipopolysaccharide; cellular response to lipopolysaccharide; negative regulation of NIK/NF-kappaB signaling	metal ion binding; zinc ion binding; DNA binding; protein binding; RNA polymerase II proximal promoter sequence-specific DNA binding; DNA-binding transcription activator activity, RNA polymerase II-specific; WW domain binding	nucleus; cytoplasm; membrane; intracellular membrane-bounded organelle; cytosol; nucleoplasm; Golgi apparatus; lysosomal membrane; plasma membrane; Golgi membrane; lysosome; endosome; late endosome membrane; early endosome membrane; endosome membrane; cytoplasmic side of plasma membrane; cytoplasmic side of early endosome membrane; cytoplasmic side of lysosomal membrane; cytoplasmic side of late …
RND3	2.42987e-10	0.410788	0.603	0.494	8.89357e-06	small GTPase mediated signal transduction; regulation of cell migration; Rho protein signal transduction; regulation of cell shape; actin filament bundle assembly; cell adhesion; actin filament organization; establishment or maintenance of actin cytoskeleton polarity; regulation of actin cytoskeleton organization; actin cytoskeleton organization	nucleotide binding; GTPase activity; GTP binding; protein binding; protein kinase binding	membrane; Golgi apparatus; Golgi membrane; focal adhesion; cytoplasm; intracellular membrane-bounded organelle; plasma membrane; cell cortex; cell division site; intracellular
PABPC1	2.63986e-10	-0.256284	0.84	0.899	9.66215e-06	mRNA processing; RNA splicing; mRNA splicing, via spliceosome; gene silencing by RNA; positive regulation of translation; negative regulation of nuclear-transcribed mRNA catabolic process, nonsense-mediated decay; regulation of mRNA stability; positive regulation of nuclear-transcribed mRNA poly(A) tail shortening; positive regulation of nuclear-transcribed mRNA catabolic process, deadenylation-d…	RNA binding; nucleic acid binding; protein binding; protein C-terminus binding; mRNA 3'-UTR binding; poly(A) binding; poly(U) RNA binding; translation activator activity	nucleus; cytoplasm; membrane; cytosol; spliceosomal complex; catalytic step 2 spliceosome; focal adhesion; extracellular exosome; ribonucleoprotein complex; cytoplasmic stress granule; cytoplasmic ribonucleoprotein granule
LRRC3B	2.6534e-10	-0.233299	0.145	0.29	9.71171e-06		protein binding	membrane; integral component of membrane; extracellular space; extracellular matrix
CYBA	2.88708e-10	0.142114	0.103	0.038	1.0567e-05	oxidation-reduction process; electron transport chain; innate immune response; antigen processing and presentation of exogenous peptide antigen via MHC class I, TAP-dependent; neutrophil degranulation; positive regulation of phagocytosis; vascular endothelial growth factor receptor signaling pathway; inflammatory response; positive regulation of reactive oxygen species biosynthetic process; cellu…	metal ion binding; oxidoreductase activity; protein binding; heme binding; protein heterodimerization activity; electron transfer activity; SH3 domain binding; superoxide-generating NADPH oxidase activity	membrane; plasma membrane; endoplasmic reticulum membrane; specific granule membrane; tertiary granule membrane; phagocytic vesicle membrane; NADPH oxidase complex; secretory granule; stress fiber; nucleus; cytoplasm; endosome; Golgi apparatus; focal adhesion; apical plasma membrane; dendrite; neuronal cell body; perinuclear endoplasmic reticulum; integral component of membrane
TTC28	3.12004e-10	-0.261824	0.297	0.462	1.14197e-05	cell division; cell cycle; regulation of mitotic cell cycle	kinase binding; protein binding	cytoplasm; cytoskeleton; spindle pole; microtubule organizing center; spindle; midbody
RPS26	3.26357e-10	-0.188169	0.979	0.994	1.1945e-05	translation; cytoplasmic translation; viral transcription; translational initiation; nuclear-transcribed mRNA catabolic process, nonsense-mediated decay; SRP-dependent cotranslational protein targeting to membrane; negative regulation of RNA splicing	RNA binding; structural constituent of ribosome; protein binding; mRNA binding; cadherin binding	cytoplasm; membrane; endoplasmic reticulum; ribosome; cytosol; cytosolic small ribosomal subunit; nucleoplasm; extracellular exosome; rough endoplasmic reticulum; cytoplasmic side of rough endoplasmic reticulum membrane; small ribosomal subunit; polysomal ribosome; intracellular
LDLRAD3	3.31364e-10	0.109207	0.103	0.038	1.21282e-05	receptor-mediated endocytosis; regulation of protein processing	protein binding; amyloid-beta binding	membrane; integral component of membrane; plasma membrane
AIG1	3.46438e-10	-0.227756	0.25	0.418	1.268e-05	lipid metabolic process; long-chain fatty acid catabolic process	hydrolase activity; protein binding	membrane; integral component of membrane; plasma membrane
GPC6	3.61124e-10	-0.181714	0.051	0.164	1.32175e-05	regulation of signal transduction; cell migration; retinoid metabolic process; glycosaminoglycan biosynthetic process; glycosaminoglycan catabolic process; Wnt signaling pathway, planar cell polarity pathway; regulation of neurotransmitter receptor localization to postsynaptic specialization membrane; synaptic membrane adhesion; regulation of protein localization to membrane; regulation of presyn…	protein binding; coreceptor activity involved in Wnt signaling pathway, planar cell polarity pathway	nucleus; membrane; extracellular space; plasma membrane; extracellular region; collagen-containing extracellular matrix; anchored component of membrane; anchored component of plasma membrane; cell surface; synapse; lysosomal lumen; Golgi lumen; glutamatergic synapse
GPR162	4.13892e-10	-0.192993	0.203	0.37	1.51488e-05	G protein-coupled receptor signaling pathway; signal transduction	G protein-coupled receptor activity	membrane; integral component of membrane; plasma membrane
RPS7	4.15521e-10	-0.169039	0.996	0.998	1.52085e-05	translation; rRNA processing; ribosomal small subunit biogenesis; viral transcription; translational initiation; nuclear-transcribed mRNA catabolic process, nonsense-mediated decay; SRP-dependent cotranslational protein targeting to membrane; positive regulation of gene expression; protein stabilization; negative regulation of ubiquitin protein ligase activity; negative regulation of ubiquitin-de…	RNA binding; structural constituent of ribosome; protein binding; protein kinase binding; mRNA 3'-UTR binding; mRNA 5'-UTR binding; ubiquitin ligase inhibitor activity	nucleus; cytoplasm; membrane; ribosome; cytoskeleton; cytosolic small ribosomal subunit; nucleolus; focal adhesion; centrosome; microtubule organizing center; small-subunit processome; nucleoplasm; cytosol; protein-containing complex; ribonucleoprotein complex; intracellular; synapse
TSPAN2	4.23923e-10	-0.159341	0.068	0.189	1.5516e-05	inflammatory response; brain development; astrocyte development; microglia development; myelination; oligodendrocyte differentiation; axon development	protein binding	membrane; integral component of membrane; integral component of plasma membrane; plasma membrane; myelin sheath
ATP6AP2	4.34152e-10	-0.284354	0.69	0.817	1.58904e-05	positive regulation of Wnt signaling pathway; neutrophil degranulation; angiotensin maturation; rostrocaudal neural tube patterning; positive regulation of transforming growth factor beta1 production; regulation of MAPK cascade; eye pigmentation; head morphogenesis	signaling receptor activity; protein binding; catalytic activity	integral component of membrane; membrane; endoplasmic reticulum; endoplasmic reticulum membrane; lysosomal membrane; plasma membrane; cell projection; cytoplasmic vesicle; lysosome; external side of plasma membrane; axon; extracellular exosome; autophagosome membrane; dendritic spine membrane; tertiary granule membrane; ficolin-1-rich granule membrane; extracellular space; apical plasma membrane;…
NME4	4.35948e-10	-0.226676	0.338	0.515	1.59561e-05	phosphorylation; lipid transport; nucleoside diphosphate phosphorylation; GTP biosynthetic process; UTP biosynthetic process; CTP biosynthetic process; nucleotide metabolic process; purine nucleotide metabolic process; pyrimidine nucleotide metabolic process; nucleoside metabolic process; nucleobase-containing small molecule interconversion	metal ion binding; nucleotide binding; ATP binding; kinase activity; transferase activity; protein binding; nucleoside diphosphate kinase activity; lipid binding; cardiolipin binding	membrane; mitochondrion; mitochondrial matrix; mitochondrial intermembrane space; mitochondrial inner membrane
TXNIP	4.42095e-10	-0.260995	0.575	0.745	1.61811e-05	cell cycle; negative regulation of transcription by RNA polymerase II; protein import into nucleus; response to oxidative stress; response to mechanical stimulus; response to glucose; response to estradiol; response to progesterone; regulation of cell population proliferation; response to drug; response to hydrogen peroxide; positive regulation of apoptotic process; negative regulation of catalyt…	protein binding; enzyme inhibitor activity; ubiquitin protein ligase binding	cytoplasm; nucleus; mitochondrial intermembrane space; cytosol
AP1S1	4.44492e-10	-0.199085	0.5	0.673	1.62689e-05	intracellular protein transport; protein transport; vesicle-mediated transport; retrograde transport, endosome to Golgi; response to virus; antigen processing and presentation of exogenous peptide antigen via MHC class II; regulation of defense response to virus by virus; receptor-mediated endocytosis		membrane; Golgi apparatus; cytosol; membrane coat; terminal bouton; intracellular membrane-bounded organelle; cytoplasmic vesicle; cytoplasmic vesicle membrane; clathrin-coated pit; trans-Golgi network membrane; Golgi membrane; lysosomal membrane; AP-1 adaptor complex
DYNLT1	4.53787e-10	0.27046	0.865	0.866	1.66091e-05	cell division; cell cycle; nervous system development; viral process; neutrophil degranulation; viral entry into host cell; establishment of mitotic spindle orientation; regulation of G protein-coupled receptor signaling pathway; negative regulation of neurogenesis; positive regulation of neuron projection development; dendrite development; intracellular transport of viral protein in host cell; p…	motor activity; protein binding; identical protein binding; protein C-terminus binding	mitochondrion; cytoplasm; Golgi apparatus; cytoskeleton; microtubule; spindle; extracellular region; cytoplasmic dynein complex; dynein complex; host cell; cytoplasmic microtubule; secretory granule lumen; ficolin-1-rich granule lumen; secretory vesicle; lamellipodium; neuronal cell body; axonal growth cone
ZNF883	4.56021e-10	-0.221473	0.16	0.303	1.66908e-05	;	; nucleic acid binding; metal ion binding; DNA binding	; nucleus
ZNF804A	4.59989e-10	0.287746	0.229	0.129	1.68361e-05	positive regulation of gene expression; positive regulation of neuron projection development; regulation of neuron projection development; positive regulation of dendritic spine maintenance	nucleic acid binding; metal ion binding	nucleus; cytoplasm; plasma membrane; growth cone; dendritic spine; neuronal cell body; postsynapse; dendritic shaft; axon; presynapse; dendritic microtubule
NCKAP5	4.67497e-10	-0.221953	0.15	0.293	1.71108e-05	microtubule depolymerization; microtubule bundle formation		microtubule plus-end
MDH1	4.7506e-10	-0.251417	0.731	0.845	1.73877e-05	oxidation-reduction process; carbohydrate metabolic process; malate metabolic process; tricarboxylic acid cycle; carboxylic acid metabolic process; gluconeogenesis; NADH metabolic process; oxaloacetate metabolic process; NAD metabolic process	catalytic activity; oxidoreductase activity, acting on the CH-OH group of donors, NAD or NADP as acceptor; malate dehydrogenase activity; oxidoreductase activity; protein binding; L-malate dehydrogenase activity; malic enzyme activity; diiodophenylpyruvate reductase activity; NAD binding	cytoplasm; extracellular space; cytosol; extracellular exosome
BCL2	4.85702e-10	-0.174275	0.064	0.182	1.77772e-05	negative regulation of apoptotic process; regulation of apoptotic process; cellular response to DNA damage stimulus; cell morphogenesis; ossification; ovarian follicle development; metanephros development; ureteric bud development; branching involved in ureteric bud morphogenesis; behavioral fear response; leukocyte homeostasis; B cell homeostasis; kidney development; release of cytochrome c from…	protein homodimerization activity; protein binding; transcription factor binding; protein phosphatase binding; protein heterodimerization activity; protein phosphatase 2A binding; identical protein binding; BH3 domain binding; ubiquitin protein ligase binding; protease binding; sequence-specific DNA binding; channel activity; channel inhibitor activity; repressing transcription factor binding	nucleus; cytoplasm; membrane; integral component of membrane; nucleoplasm; endoplasmic reticulum; endoplasmic reticulum membrane; mitochondrion; nuclear membrane; cytosol; mitochondrial membrane; myelin sheath; mitochondrial outer membrane; protein-containing complex; pore complex
NSF	4.90008e-10	-0.254748	0.28	0.445	1.79348e-05	protein transport; exocytosis; plasma membrane fusion; potassium ion transport; SNARE complex disassembly; retrograde vesicle-mediated transport, Golgi to endoplasmic reticulum; Golgi to plasma membrane protein transport; endoplasmic reticulum to Golgi vesicle-mediated transport; COPII vesicle coating; regulation of exocytosis; Golgi vesicle docking; positive regulation of receptor recycling; int…	metal ion binding; nucleotide binding; ATP binding; hydrolase activity; protein binding; ATPase activity; syntaxin-1 binding; protein kinase binding; syntaxin binding; ATPase activity, coupled; Rab GTPase binding; protein-containing complex binding; PDZ domain binding; SNARE binding; ionotropic glutamate receptor binding	cytoplasm; cytosol; lysosomal membrane; plasma membrane; Golgi membrane; Golgi stack; postsynaptic density; dendritic shaft
RPS24	4.97607e-10	-0.189572	1	1	1.82129e-05	translation; rRNA processing; ribosomal small subunit biogenesis; viral transcription; translational initiation; nuclear-transcribed mRNA catabolic process, nonsense-mediated decay; SRP-dependent cotranslational protein targeting to membrane; erythrocyte homeostasis	structural constituent of ribosome; RNA binding; translation initiation factor binding	ribosome; intracellular; nucleus; membrane; cytosolic small ribosomal subunit; nucleoplasm; cytosol; small ribosomal subunit
VLDLR-AS1	5.12071e-10	-0.185474	0.09	0.215	1.87423e-05
CACNA1E	5.13924e-10	-0.205217	0.128	0.268	1.88101e-05	transmembrane transport; ion transport; regulation of ion transmembrane transport; calcium ion transport; calcium ion transmembrane transport; chemical synaptic transmission; membrane depolarization; regulation of insulin secretion; calcium ion import	ion channel activity; voltage-gated ion channel activity; voltage-gated calcium channel activity; calcium channel activity; metal ion binding; calcium ion binding; voltage-gated cation channel activity	membrane; integral component of membrane; voltage-gated calcium channel complex; plasma membrane
PCDH9	5.15488e-10	0.455838	0.729	0.704	1.88674e-05	cell adhesion; homophilic cell adhesion via plasma membrane adhesion molecules	calcium ion binding	membrane; integral component of membrane; plasma membrane; integral component of plasma membrane; growth cone; cell-cell contact zone
IER5	5.27202e-10	0.33955	0.485	0.374	1.92961e-05	positive regulation of transcription by RNA polymerase II; regulation of cell population proliferation; cellular response to heat; positive regulation of cellular response to heat	protein binding; identical protein binding	nucleus; cytoplasm; protein phosphatase type 2A complex
KLHL24	5.31591e-10	0.3049	0.639	0.559	1.94568e-05	protein ubiquitination; protein autoubiquitination; regulation of kainate selective glutamate receptor activity; intermediate filament organization	protein binding	cytoplasm; cell projection; cell junction; axon; perikaryon; adherens junction; Cul3-RING ubiquitin ligase complex; desmosome
ENO1	5.66415e-10	-0.291891	0.686	0.817	2.07314e-05	glycolytic process; negative regulation of transcription by RNA polymerase II; response to virus; negative regulation of cell growth; negative regulation of transcription, DNA-templated; gluconeogenesis; canonical glycolysis; positive regulation of plasminogen activation; positive regulation of muscle contraction; negative regulation of hypoxia-induced intrinsic apoptotic signaling pathway; posit…	RNA binding; metal ion binding; magnesium ion binding; lyase activity; DNA binding; protein binding; phosphopyruvate hydratase activity; DNA-binding transcription repressor activity, RNA polymerase II-specific; cadherin binding; RNA polymerase II regulatory region sequence-specific DNA binding; protein homodimerization activity; GTPase binding	cytoplasm; nucleus; membrane; cytosol; plasma membrane; extracellular space; phosphopyruvate hydratase complex; extracellular exosome; M band; cell surface; cell cortex region
MYT1	5.73617e-10	0.276296	0.327	0.217	2.09949e-05	regulation of transcription, DNA-templated; multicellular organism development; cell differentiation; regulation of transcription by RNA polymerase II; positive regulation of transcription by RNA polymerase II; nervous system development	zinc ion binding; transcription regulator activity; metal ion binding; DNA binding; DNA-binding transcription factor activity; RNA polymerase II regulatory region sequence-specific DNA binding; DNA-binding transcription activator activity, RNA polymerase II-specific; DNA-binding transcription factor activity, RNA polymerase II-specific	nucleus; cytosol; nucleoplasm; nuclear chromatin
PHPT1	6.33969e-10	-0.226739	0.842	0.916	2.32039e-05	positive regulation of cell motility; negative regulation of T cell receptor signaling pathway; protein dephosphorylation; peptidyl-histidine dephosphorylation; negative regulation of lyase activity; regulation of actin cytoskeleton reorganization; negative regulation of ATP citrate synthase activity; positive regulation of insulin secretion involved in cellular response to glucose stimulus	hydrolase activity; phosphoprotein phosphatase activity; protein binding; ion channel binding; calcium channel inhibitor activity; protein histidine phosphatase activity	cytoplasm; cytosol; extracellular exosome
GAS6	6.40024e-10	-0.198758	0.143	0.286	2.34255e-05	negative regulation of apoptotic process; cell adhesion; signal transduction; calcium ion transmembrane transport; leukocyte migration; apoptotic process; positive regulation of protein phosphorylation; positive regulation of peptidyl-serine phosphorylation; positive regulation of gene expression; cellular protein metabolic process; regulation of growth; cell migration; post-translational protein…	metal ion binding; calcium ion binding; protein binding; signaling receptor binding; protein binding, bridging; voltage-gated calcium channel activity; receptor tyrosine kinase binding; phosphatidylserine binding; cysteine-type endopeptidase inhibitor activity involved in apoptotic process; protein tyrosine kinase activator activity; receptor ligand activity	cytoplasm; extracellular region; extracellular space; extracellular exosome; endoplasmic reticulum lumen; platelet alpha granule lumen; Golgi lumen
SEMA4D	6.4061e-10	-0.174533	0.12	0.262	2.3447e-05	positive regulation of cell migration; negative regulation of osteoblast differentiation; multicellular organism development; cell differentiation; nervous system development; positive regulation of GTPase activity; negative regulation of transcription by RNA polymerase II; positive regulation of protein phosphorylation; regulation of cell shape; positive regulation of peptidyl-tyrosine phosphory…	semaphorin receptor binding; protein binding; signaling receptor binding; transmembrane signaling receptor activity; chemorepellent activity; signaling receptor activity	extracellular space; membrane; integral component of membrane; plasma membrane; integral component of plasma membrane
TMEM145	6.49481e-10	-0.150648	0.066	0.186	2.37717e-05	G protein-coupled receptor signaling pathway; response to pheromone		membrane; integral component of membrane
SPRY1	6.99262e-10	0.210099	0.229	0.128	2.55937e-05	negative regulation of cell population proliferation; negative regulation of Ras protein signal transduction; negative regulation of ERK1 and ERK2 cascade; organ induction; epithelial to mesenchymal transition involved in cardiac fibroblast development; multicellular organism development; regulation of signal transduction; negative regulation of epidermal growth factor receptor signaling pathway;…	protein binding	cytoplasm; membrane; Golgi apparatus; cytosol; nucleoplasm; plasma membrane
SDC3	7.07717e-10	-0.17034	0.171	0.327	2.59031e-05	leukocyte migration; cell migration; retinoid metabolic process; glycosaminoglycan biosynthetic process; glycosaminoglycan catabolic process	protein binding; identical protein binding	membrane; integral component of membrane; plasma membrane; cell surface; collagen-containing extracellular matrix; lysosomal lumen; Golgi lumen; microspike
RASGEF1B	7.12639e-10	0.281494	0.19	0.099	2.60833e-05	small GTPase mediated signal transduction	guanyl-nucleotide exchange factor activity; Ras guanyl-nucleotide exchange factor activity	midbody; endosome; early endosome; late endosome; intracellular
SPIRE1	7.28495e-10	-0.293532	0.485	0.65	2.66636e-05	protein transport; vesicle-mediated transport; actin nucleation; actin cytoskeleton organization; intracellular transport; cleavage furrow formation; positive regulation of double-strand break repair; polar body extrusion after meiotic divisions; establishment of meiotic spindle localization; formin-nucleated actin cable assembly	actin binding	cytoplasm; membrane; cytosol; nucleoplasm; plasma membrane; cytoskeleton; perinuclear region of cytoplasm; cytoplasmic vesicle; cytoplasmic vesicle membrane; cell cortex; cleavage furrow
TENM3	7.41442e-10	-0.269357	0.22	0.371	2.71375e-05	signal transduction; cell adhesion; cell differentiation; homophilic cell adhesion via plasma membrane adhesion molecules; positive regulation of neuron projection development; heterophilic cell-cell adhesion via plasma membrane cell adhesion molecules; regulation of homophilic cell adhesion; neuron development; camera-type eye morphogenesis	protein homodimerization activity; protein heterodimerization activity; cell adhesion molecule binding; protein binding	integral component of membrane; membrane; integral component of plasma membrane; plasma membrane; cell projection; axon; neuron projection
ATP5F1A	7.43273e-10	0.256312	0.932	0.884	2.72045e-05	lipid metabolic process; proton transmembrane transport; ion transport; ATP synthesis coupled proton transport; ATP metabolic process; ATP biosynthetic process; negative regulation of endothelial cell proliferation; cristae formation; mitochondrial ATP synthesis coupled proton transport; positive regulation of blood vessel endothelial cell migration	RNA binding; nucleotide binding; ATP binding; protein binding; adenyl ribonucleotide binding; proton-transporting ATP synthase activity, rotational mechanism; ATPase activity; MHC class I protein binding; transmembrane transporter activity; ADP binding; angiostatin binding	membrane; mitochondrial inner membrane; mitochondrion; plasma membrane; proton-transporting ATP synthase complex, catalytic core F(1); extracellular exosome; COP9 signalosome; mitochondrial matrix; mitochondrial proton-transporting ATP synthase complex; proton-transporting ATP synthase complex
SLCO3A1	7.70761e-10	-0.224544	0.177	0.327	2.82106e-05	transmembrane transport; ion transport; sodium-independent organic anion transport; prostaglandin transport	sodium-independent organic anion transmembrane transporter activity; protein binding; transporter activity	membrane; integral component of membrane; plasma membrane; integral component of plasma membrane
MAGED2	8.19505e-10	-0.236646	0.701	0.842	2.99947e-05	renal sodium ion absorption; female pregnancy; platelet degranulation	protein binding	membrane; nucleus; nucleolus; cytosol; extracellular region; platelet alpha granule lumen
SV2A	8.40579e-10	-0.283674	0.534	0.675	3.0766e-05	transmembrane transport; chemical synaptic transmission; neurotransmitter transport; cellular calcium ion homeostasis; regulation of gamma-aminobutyric acid secretion; synaptic vesicle priming	transmembrane transporter activity; protein kinase binding; transporter activity	membrane; integral component of membrane; integral component of plasma membrane; cell junction; cytoplasmic vesicle; synapse; plasma membrane; neuron projection; endoplasmic reticulum; synaptic vesicle membrane; synaptic vesicle; cell-cell junction; integral component of synaptic vesicle membrane; dendrite; neuromuscular junction; neuronal cell body; presynaptic active zone; glutamatergic synapse…
ELAVL4	8.52934e-10	0.292933	0.897	0.901	3.12182e-05	mRNA processing; RNA splicing; learning; locomotory behavior; dendrite morphogenesis	nucleic acid binding; RNA binding; mRNA 3'-UTR binding; mRNA 3'-UTR AU-rich region binding; mRNA binding	ribonucleoprotein complex; cytoplasm; cell projection; dendrite; axon; growth cone; perikaryon
CACNA1D	9.31395e-10	-0.171426	0.079	0.2	3.409e-05	transmembrane transport; ion transport; regulation of ion transmembrane transport; calcium ion transport; calcium ion transmembrane transport; induction of synaptic vesicle exocytosis by positive regulation of presynaptic cytosolic calcium ion concentration; cardiac conduction; regulation of potassium ion transmembrane transporter activity; regulation of insulin secretion; calcium ion import; car…	ion channel activity; voltage-gated ion channel activity; voltage-gated calcium channel activity; calcium channel activity; metal ion binding; protein binding; high voltage-gated calcium channel activity; voltage-gated calcium channel activity involved SA node cell action potential; ankyrin binding; alpha-actinin binding; voltage-gated calcium channel activity involved in cardiac muscle cell acti…	membrane; integral component of membrane; voltage-gated calcium channel complex; plasma membrane; Z disc; L-type voltage-gated calcium channel complex; cochlear hair cell ribbon synapse; integral component of presynaptic active zone membrane
LY6H	9.47026e-10	-0.277893	0.581	0.744	3.46621e-05	acetylcholine receptor signaling pathway; negative regulation of signaling receptor activity; nervous system development; animal organ morphogenesis	protein binding; acetylcholine receptor binding; acetylcholine receptor inhibitor activity	membrane; plasma membrane; extracellular region; anchored component of membrane
RCN1	1.02331e-09	0.252245	0.263	0.162	3.74542e-05	cellular protein metabolic process; post-translational protein modification	metal ion binding; calcium ion binding; protein binding	endoplasmic reticulum; endoplasmic reticulum lumen
RAP1B	1.0369e-09	0.329285	0.618	0.551	3.79517e-05	signal transduction; small GTPase mediated signal transduction; cell population proliferation; response to carbohydrate; Rap protein signal transduction; cellular response to drug; negative regulation of calcium ion-dependent exocytosis; positive regulation of ERK1 and ERK2 cascade; cellular response to organic cyclic compound; cellular response to gonadotropin-releasing hormone; negative regulat…	nucleotide binding; GTPase activity; GTP binding; protein binding; GDP binding; protein-containing complex binding	cytoplasm; membrane; cytosol; plasma membrane; cell junction; extracellular exosome; azurophil granule membrane; cell-cell junction; lipid droplet; intracellular
MAP4K4	1.06869e-09	0.361381	0.846	0.878	3.91149e-05	protein phosphorylation; negative regulation of cell-matrix adhesion; positive regulation of cell migration; phosphorylation; neuron projection morphogenesis; signal transduction by protein phosphorylation; activation of protein kinase activity; intracellular signal transduction; regulation of JNK cascade; positive regulation of ARF protein signal transduction; negative regulation of apoptotic pr…	protein kinase activity; ATP binding; nucleotide binding; protein serine/threonine kinase activity; kinase activity; transferase activity; protein binding; microtubule binding; creatine kinase activity	cytoplasm; focal adhesion
LRCH1	1.08232e-09	-0.210023	0.177	0.327	3.96141e-05	negative regulation of T cell migration; negative regulation of GTPase activity; cellular response to chemokine	protein binding	cytoplasm
AASS	1.09149e-09	-0.255825	0.147	0.285	3.99496e-05	oxidation-reduction process; metabolic process; lysine catabolic process; protein tetramerization; L-lysine catabolic process to acetyl-CoA via saccharopine; lysine biosynthetic process via aminoadipic acid; L-lysine catabolic process	oxidoreductase activity; catalytic activity; saccharopine dehydrogenase activity; saccharopine dehydrogenase (NADP+, L-lysine-forming) activity; saccharopine dehydrogenase (NAD+, L-glutamate-forming) activity	intracellular membrane-bounded organelle; mitochondrion; cytoplasm; mitochondrial matrix
ZNF682	1.12539e-09	-0.251589	0.331	0.508	4.11903e-05	regulation of transcription, DNA-templated	nucleic acid binding; metal ion binding; DNA binding	intracellular; nucleus
TIMP2	1.1649e-09	-0.225225	0.224	0.38	4.26364e-05	negative regulation of endopeptidase activity; central nervous system development; aging; negative regulation of cell population proliferation; regulation of Rap protein signal transduction; response to cytokine; response to drug; positive regulation of MAPK cascade; positive regulation of neuron differentiation; positive regulation of adenylate cyclase activity; negative regulation of proteolysi…	metalloendopeptidase inhibitor activity; protein binding; metal ion binding; zinc ion binding; integrin binding; peptidase inhibitor activity; protease binding; enzyme inhibitor activity	extracellular region; extracellular space; cell surface; growth cone; neuron projection; neuronal cell body; extracellular matrix; collagen-containing extracellular matrix; ficolin-1-rich granule lumen; specific granule lumen; tertiary granule lumen
ITGB1	1.27107e-09	0.285264	0.549	0.443	4.65225e-05	positive regulation of angiogenesis; positive regulation of protein kinase B signaling; cell adhesion; integrin-mediated signaling pathway; cell-matrix adhesion; viral entry into host cell; regulation of immune response; leukocyte migration; positive regulation of GTPase activity; cell migration; positive regulation of cell migration; viral process; cell adhesion mediated by integrin; cytokine-me…	metal ion binding; protein binding; signaling receptor activity; cadherin binding; fibronectin binding; integrin binding; protein heterodimerization activity; protease binding; protein-containing complex binding; actin binding; virus receptor activity; coreceptor activity; collagen binding involved in cell-matrix adhesion; cell adhesion molecule binding; laminin binding; C-X3-C chemokine binding	cytoplasm; membrane; integral component of membrane; plasma membrane; cell projection; melanosome; cell junction; cell surface; integrin complex; focal adhesion; endosome; lamellipodium; extracellular exosome; sarcolemma; cleavage furrow; ruffle membrane; recycling endosome; ruffle; receptor complex; membrane raft; integrin alpha10-beta1 complex; protein-containing complex; neuromuscular junction…
NNAT	1.40797e-09	0.7315	0.613	0.545	5.15333e-05	multicellular organism development; brain development; positive regulation of insulin secretion; protein lipoylation; neuron differentiation		cytoplasm; membrane; integral component of membrane
DLL3	1.43454e-09	0.428971	0.491	0.425	5.25057e-05	multicellular organism development; Notch signaling pathway; cell differentiation; skeletal system development; negative regulation of Notch signaling pathway; somitogenesis; compartment pattern specification; tissue development; paraxial mesoderm development; negative regulation of neurogenesis	calcium ion binding; Notch binding	integral component of membrane; membrane; plasma membrane
DISP2	1.45709e-09	-0.261834	0.329	0.492	5.33308e-05	smoothened signaling pathway		membrane; integral component of membrane; plasma membrane
IQCE	1.58601e-09	-0.181516	0.113	0.244	5.80495e-05	limb morphogenesis	protein binding	membrane; plasma membrane; cell projection; cilium; ciliary membrane
SORBS2	1.66206e-09	0.334035	0.647	0.58	6.0833e-05	cell growth involved in cardiac muscle cell development; actin filament organization; Notch signaling pathway	nucleic acid binding; RNA binding; protein binding; structural constituent of cytoskeleton; structural constituent of muscle; cytoskeletal adaptor activity	nucleus; cytoplasm; membrane; nucleoplasm; plasma membrane; cell projection; perinuclear region of cytoplasm; cell junction; focal adhesion; lamellipodium; apical plasma membrane; Z disc; actin cytoskeleton
HDDC2	1.7453e-09	0.228001	0.31	0.201	6.38796e-05	dephosphorylation	protein binding; 5'-deoxynucleotidase activity
DPY19L1	1.76611e-09	-0.46022	0.122	0.245	6.46413e-05	protein C-linked glycosylation via 2'-alpha-mannosyl-L-tryptophan	transferase activity; transferase activity, transferring glycosyl groups; mannosyltransferase activity	membrane; integral component of membrane; nuclear inner membrane
REEP3	1.77306e-09	0.198919	0.188	0.1	6.48959e-05	cell division; cell cycle; nuclear envelope organization; mitotic nuclear envelope reassembly		membrane; integral component of membrane; endoplasmic reticulum; endoplasmic reticulum membrane; microtubule
NASP	1.81192e-09	0.26127	0.821	0.783	6.63179e-05	protein transport; cell cycle; DNA replication; cell population proliferation; DNA replication-dependent nucleosome assembly; DNA replication-independent nucleosome assembly; CENP-A containing nucleosome assembly; histone exchange; G1/S transition of mitotic cell cycle; blastocyst development; male gonad development; response to testosterone	protein binding; histone binding	nucleoplasm; nucleus; cytoplasm; nuclear chromatin; protein-containing complex
DDX5	1.9523e-09	0.192118	0.987	0.994	7.14563e-05	BMP signaling pathway; mRNA processing; RNA splicing; rhythmic process; mRNA splicing, via spliceosome; nuclear-transcribed mRNA catabolic process; negative regulation of transcription by RNA polymerase II; regulation of transcription by RNA polymerase II; regulation of alternative mRNA splicing, via spliceosome; androgen receptor signaling pathway; intracellular estrogen receptor signaling pathw…	nucleic acid binding; RNA binding; nucleotide binding; ATP binding; hydrolase activity; protein binding; helicase activity; RNA helicase activity; ribonucleoprotein complex binding; R-SMAD binding; mRNA 3'-UTR binding; SMAD binding; androgen receptor binding; promoter-specific chromatin binding; pre-mRNA binding; primary miRNA binding; calmodulin binding; enzyme binding; MH2 domain binding; calci…	nucleus; membrane; spliceosomal complex; catalytic step 2 spliceosome; nucleolus; cytoplasm; nucleoplasm; extracellular exosome; ribonucleoprotein complex
SNHG29	2.0022e-09	0.222624	0.97	0.965	7.32825e-05
EZH2	2.04657e-09	0.290775	0.547	0.446	7.49064e-05	histone lysine methylation; positive regulation of cell population proliferation; methylation; chromatin organization; rhythmic process; negative regulation of transcription by RNA polymerase II; positive regulation of GTPase activity; positive regulation of protein serine/threonine kinase activity; negative regulation of retinoic acid receptor signaling pathway; negative regulation of transcript…	histone-lysine N-methyltransferase activity; transferase activity; methyltransferase activity; chromatin DNA binding; protein binding; DNA-binding transcription factor activity, RNA polymerase II-specific; chromatin binding; DNA binding; RNA polymerase II proximal promoter sequence-specific DNA binding; histone methyltransferase activity; promoter-specific chromatin binding; histone methyltransfe…	nucleus; nuclear chromatin; nucleoplasm; ESC/E(Z) complex; chromosome, telomeric region; cytoplasm; pronucleus
PLPPR4	2.04746e-09	-0.16854	0.081	0.199	7.49389e-05	phospholipid dephosphorylation; phospholipid metabolic process; axonogenesis; inner ear development	hydrolase activity; phosphatidate phosphatase activity; phosphatase activity; lipid phosphatase activity	membrane; integral component of membrane; integral component of plasma membrane; plasma membrane; glutamatergic synapse; integral component of postsynaptic density membrane
GNPTAB	2.08419e-09	-0.231719	0.365	0.535	7.62834e-05	lysosome organization; carbohydrate phosphorylation; protein secretion; N-glycan processing to lysosome; secretion of lysosomal enzymes	metal ion binding; transferase activity; calcium ion binding; transferase activity, transferring phosphorus-containing groups; protein binding; UDP-N-acetylglucosamine-lysosomal-enzyme N-acetylglucosaminephosphotransferase activity	membrane; integral component of membrane; Golgi apparatus; Golgi membrane
RPS27A	2.17314e-09	-0.172522	0.994	1	7.95391e-05	translation; protein ubiquitination; cellular protein metabolic process; endosomal transport; viral life cycle; intracellular transport of virus; protein polyubiquitination; protein deubiquitination; anaphase-promoting complex-dependent catabolic process; regulation of mRNA stability; transmembrane transport; regulation of transcription from RNA polymerase II promoter in response to hypoxia; inte…	RNA binding; metal ion binding; structural constituent of ribosome; protein binding; ubiquitin protein ligase binding; protein tag	nucleus; cytoplasm; membrane; ribosome; extracellular space; cytosolic small ribosomal subunit; nucleolus; plasma membrane; endoplasmic reticulum membrane; nucleoplasm; cytosol; extracellular exosome; endosome membrane; host cell; vesicle; endocytic vesicle membrane; mitochondrial outer membrane; small ribosomal subunit
FRMD4B	2.18691e-09	-0.352601	0.415	0.573	8.00431e-05	establishment of epithelial cell polarity		cytoplasm; extracellular space; cytoskeleton; cell junction; bicellular tight junction; adherens junction; ruffle
EIF2S2	2.39662e-09	-0.228053	0.726	0.851	8.77188e-05	translation; translational initiation; transmembrane transport; formation of translation preinitiation complex; in utero embryonic development; formation of cytoplasmic translation initiation complex; male germ cell proliferation; male gonad development	RNA binding; translation initiation factor activity; metal ion binding; protein binding; mRNA binding; translation initiation factor binding; translation factor activity, RNA binding	cytoplasm; cytosol; eukaryotic translation initiation factor 2 complex
KLHDC8A	2.40898e-09	0.149517	0.126	0.055	8.81711e-05		protein binding
TMEM59	2.64486e-09	-0.234642	0.703	0.832	9.68045e-05	proteolysis; autophagy; positive regulation of autophagy; negative regulation of protein localization to plasma membrane; negative regulation of protein processing; negative regulation of protein glycosylation in Golgi	protein binding; endopeptidase activity	membrane; integral component of membrane; Golgi apparatus; lysosomal membrane; plasma membrane; Golgi membrane; lysosome; endosome; late endosome membrane; extracellular exosome; late endosome; Golgi medial cisterna; Golgi trans cisterna; Golgi cis cisterna
PRKX	2.72337e-09	0.26063	0.4	0.294	9.9678e-05	protein phosphorylation; phosphorylation; cell adhesion; multicellular organism development; cell differentiation; signal transduction; regulation of cell adhesion; angiogenesis; peptidyl-serine phosphorylation; regulation of cell migration; protein autophosphorylation; endothelial cell migration; cell-substrate adhesion; endothelial cell proliferation; myeloid cell differentiation; epithelial tu…	nucleotide binding; protein kinase activity; protein serine/threonine kinase activity; ATP binding; kinase activity; transferase activity; protein binding; cAMP-dependent protein kinase activity	nucleus; cytoplasm; cAMP-dependent protein kinase complex
HIF3A	2.77354e-09	-0.173632	0.111	0.239	0.000101514	regulation of transcription, DNA-templated; apoptotic process; multicellular organism development; regulation of transcription by RNA polymerase II; positive regulation of transcription by RNA polymerase II; protein ubiquitination; post-translational protein modification; regulation of transcription from RNA polymerase II promoter in response to hypoxia; angiogenesis; response to hypoxia; transcr…	protein dimerization activity; DNA-binding transcription factor activity, RNA polymerase II-specific; DNA binding; DNA-binding transcription factor activity; protein binding	nucleus; cytoplasm; nuclear speck; cytosol; nucleoplasm; mitochondrion; plasma membrane; nuclear chromatin
RPS13	2.83706e-09	-0.180834	1	0.999	0.000103839	translation; viral transcription; translational initiation; nuclear-transcribed mRNA catabolic process, nonsense-mediated decay; SRP-dependent cotranslational protein targeting to membrane; negative regulation of RNA splicing	structural constituent of ribosome; RNA binding; protein binding; mRNA binding; mRNA 5'-UTR binding; small ribosomal subunit rRNA binding	ribosome; nucleus; membrane; cytosolic small ribosomal subunit; nucleolus; focal adhesion; nucleoplasm; cytosol; extracellular exosome; postsynaptic density; intracellular
ADGRG1	2.84659e-09	0.298818	0.494	0.415	0.000104188	G protein-coupled receptor signaling pathway; cell adhesion; signal transduction; cell surface receptor signaling pathway; multicellular organism development; cell differentiation; nervous system development; negative regulation of cell population proliferation; cell migration; angiogenesis; cell-cell signaling; positive regulation of cell adhesion; adenylate cyclase-activating G protein-coupled …	G protein-coupled receptor activity; transmembrane signaling receptor activity; protein binding; heparin binding; extracellular matrix binding; collagen binding	membrane; integral component of membrane; plasma membrane; extracellular region; membrane raft; integral component of plasma membrane; extracellular exosome; glial limiting end-foot
RNF165	2.92213e-09	0.333509	0.665	0.602	0.000106953	protein polyubiquitination; axonogenesis; motor neuron axon guidance; multicellular organism aging; protein catabolic process; positive regulation of BMP signaling pathway; forelimb morphogenesis; limb development; innervation; muscle structure development	zinc ion binding; metal ion binding; transferase activity; ligase activity; protein binding; ubiquitin protein ligase activity	nucleus; protein-containing complex
THNSL1	2.93792e-09	-0.153734	0.085	0.205	0.000107531
EIF1	2.96802e-09	0.162954	0.994	0.997	0.000108633	translational initiation; translation; regulation of translational initiation	translation initiation factor activity; RNA binding; protein binding; translation factor activity, RNA binding; ribosomal small subunit binding	nucleus; cytoplasm; eukaryotic 43S preinitiation complex
RHOBTB3	3.06644e-09	0.302445	0.697	0.621	0.000112235	vesicle-mediated transport; motor neuron axon guidance; retrograde transport, endosome to Golgi; Rho protein signal transduction; regulation of cell shape; actin cytoskeleton organization; actin filament organization; regulation of actin cytoskeleton organization; engulfment of apoptotic cell; establishment or maintenance of cell polarity; male gonad development	GTPase activity; GTP binding; ATPase activity; Rab GTPase binding; nucleotide binding; ATP binding; hydrolase activity; protein binding; protein kinase binding	cytosol; Golgi apparatus; cytoplasm; plasma membrane; extracellular exosome; cell cortex; trans-Golgi network membrane; cell projection
PLK2	3.17273e-09	-0.317158	0.372	0.515	0.000116125	protein phosphorylation; phosphorylation; negative regulation of apoptotic process; mitotic cell cycle; mitotic cell cycle checkpoint; Ras protein signal transduction; memory; negative regulation of angiogenesis; positive regulation of protein binding; positive regulation of proteasomal ubiquitin-dependent protein catabolic process; Rap protein signal transduction; regulation of synaptic plastici…	nucleotide binding; protein kinase activity; protein serine/threonine kinase activity; ATP binding; kinase activity; transferase activity; protein-containing complex binding; protein binding; ATP-dependent protein binding	cytoplasm; chromatin; dendrite; cytoskeleton; cell projection; centrosome; nucleus; cytosol; centriole; spindle pole
STK17A	3.31706e-09	0.399575	0.481	0.389	0.000121408	protein phosphorylation; phosphorylation; apoptotic process; positive regulation of apoptotic process; intracellular signal transduction; positive regulation of fibroblast apoptotic process; regulation of reactive oxygen species metabolic process	nucleotide binding; protein kinase activity; protein serine/threonine kinase activity; ATP binding; kinase activity; transferase activity	nucleus; nuclear speck; plasma membrane
LMO4	3.33555e-09	0.330045	0.613	0.516	0.000122084	transcription by RNA polymerase II; regulation of cell migration; neural tube closure; positive regulation of kinase activity; ventricular septum development; ventral spinal cord interneuron differentiation; spinal cord motor neuron differentiation; spinal cord association neuron differentiation; negative regulation of protein complex assembly; regulation of cell fate specification; positive regu…	metal ion binding; DNA-binding transcription factor activity; protein binding; transcription factor binding; enhancer sequence-specific DNA binding	cell leading edge; transcription factor complex
TCEAL1	3.35656e-09	-0.139688	0.118	0.25	0.000122854	negative regulation of transcription by RNA polymerase II	DNA-binding transcription factor activity; WW domain binding	nucleus; nucleoplasm
STMP1	3.39186e-09	0.276917	0.784	0.755	0.000124146			membrane; integral component of membrane; mitochondrion; mitochondrial membrane; mitochondrial respirasome
B3GAT1	3.43205e-09	-0.297062	0.308	0.45	0.000125617	protein glycosylation; carbohydrate metabolic process; glycosaminoglycan metabolic process; chondroitin sulfate proteoglycan biosynthetic process; cellular response to hypoxia	metal ion binding; transferase activity; galactosylgalactosylxylosylprotein 3-beta-glucuronosyltransferase activity; UDP-galactose:beta-N-acetylglucosamine beta-1,3-galactosyltransferase activity	membrane; integral component of membrane; intracellular membrane-bounded organelle; endoplasmic reticulum; endoplasmic reticulum membrane; Golgi apparatus; extracellular region; Golgi membrane
ATP5PO	3.59556e-09	0.224376	0.938	0.93	0.000131601	ATP synthesis coupled proton transport; ion transport; proton transmembrane transport; ATP biosynthetic process; cristae formation; mitochondrial ATP synthesis coupled proton transport	proton-transporting ATP synthase activity, rotational mechanism; protein binding; ATPase activity; drug binding; transmembrane transporter activity	nucleus; membrane; mitochondrial inner membrane; mitochondrion; plasma membrane; mitochondrial proton-transporting ATP synthase complex
MT-CO2	3.66986e-09	0.191026	0.989	0.987	0.00013432	oxidation-reduction process; electron transport chain; proton transmembrane transport; mitochondrial electron transport, cytochrome c to oxygen; lactation; response to cold; positive regulation of hydrogen peroxide biosynthetic process; positive regulation of necrotic cell death; ATP synthesis coupled electron transport; positive regulation of ATP biosynthetic process	metal ion binding; oxidoreductase activity; protein binding; cytochrome-c oxidase activity; copper ion binding	membrane; integral component of membrane; mitochondrial inner membrane; mitochondrion; respirasome; respiratory chain complex IV
FDFT1	3.70337e-09	-0.291958	0.718	0.82	0.000135547	lipid metabolic process; biosynthetic process; steroid biosynthetic process; steroid metabolic process; sterol biosynthetic process; metabolic process; lipid biosynthetic process; cholesterol metabolic process; cholesterol biosynthetic process; ergosterol biosynthetic process; regulation of cholesterol biosynthetic process; regulation of lipid metabolic process; farnesyl diphosphate metabolic pro…	metal ion binding; transferase activity; protein binding; catalytic activity; transferase activity, transferring alkyl or aryl (other than methyl) groups; farnesyl-diphosphate farnesyltransferase activity; squalene synthase activity	endoplasmic reticulum; membrane; integral component of membrane; endoplasmic reticulum membrane; intracellular membrane-bounded organelle
DYNC1I2	3.92844e-09	0.235301	0.934	0.922	0.000143785	microtubule-based movement; viral process; G2/M transition of mitotic cell cycle; regulation of G2/M transition of mitotic cell cycle; ciliary basal body-plasma membrane docking; antigen processing and presentation of exogenous peptide antigen via MHC class II; endoplasmic reticulum to Golgi vesicle-mediated transport; positive regulation of ATP-dependent microtubule motor activity, plus-end-dire…	motor activity; protein binding; ATP-dependent microtubule motor activity, plus-end-directed; dynein light chain binding; dynein heavy chain binding; microtubule motor activity	cytoplasmic dynein complex; cytoplasm; cytoskeleton; microtubule; centrosome; dynein complex; cytosol; vesicle
SQLE	4.04877e-09	-0.313149	0.729	0.829	0.000148189	oxidation-reduction process; sterol biosynthetic process; regulation of cell population proliferation; lipid droplet formation; regulation of cholesterol biosynthetic process; cholesterol metabolic process; cholesterol biosynthetic process; cellular aromatic compound metabolic process; response to organic substance	flavin adenine dinucleotide binding; squalene monooxygenase activity; oxidoreductase activity; protein binding; FAD binding	membrane; integral component of membrane; endoplasmic reticulum; endoplasmic reticulum membrane; organelle membrane; intracellular membrane-bounded organelle
VLDLR	4.05323e-09	-0.151639	0.107	0.233	0.000148352	lipid metabolic process; steroid metabolic process; lipid transport; cholesterol metabolic process; endocytosis; nervous system development; signal transduction; axon guidance; positive regulation of dendrite development; low-density lipoprotein particle receptor catabolic process; receptor-mediated endocytosis; very-low-density lipoprotein particle clearance; glycoprotein transport; reelin-media…	calcium ion binding; protein binding; apolipoprotein binding; low-density lipoprotein particle receptor activity; very-low-density lipoprotein particle receptor activity; calcium-dependent protein binding; very-low-density lipoprotein particle binding; cargo receptor activity; reelin receptor activity	membrane; integral component of membrane; clathrin-coated pit; plasma membrane; very-low-density lipoprotein particle; lysosomal membrane; receptor complex; extracellular space
FOXN3	4.12612e-09	-0.232568	0.355	0.521	0.00015102	regulation of transcription, DNA-templated; cell cycle; craniofacial suture morphogenesis; regulation of transcription by RNA polymerase II; negative regulation of transcription, DNA-templated; mitotic G2 DNA damage checkpoint	DNA binding; DNA-binding transcription factor activity; sequence-specific DNA binding; protein binding; DNA-binding transcription factor activity, RNA polymerase II-specific; protein C-terminus binding	nucleus; nuclear chromatin
RPL27	4.15761e-09	-0.174009	0.968	0.993	0.000152173	translation; rRNA processing; viral transcription; translational initiation; nuclear-transcribed mRNA catabolic process, nonsense-mediated decay; SRP-dependent cotranslational protein targeting to membrane	RNA binding; structural constituent of ribosome; protein binding	nucleus; cytoplasm; membrane; endoplasmic reticulum; ribosome; cytosol; focal adhesion; cytosolic large ribosomal subunit; extracellular exosome; ribonucleoprotein complex; rough endoplasmic reticulum; cytoplasmic side of rough endoplasmic reticulum membrane; intracellular
CELF6	4.19802e-09	-0.16937	0.152	0.297	0.000153652	mRNA processing; regulation of alternative mRNA splicing, via spliceosome; mRNA splice site selection	nucleic acid binding; RNA binding; mRNA binding	nucleus; cytoplasm; cytosol; ribonucleoprotein complex
GPR27	4.25371e-09	-0.20167	0.22	0.372	0.00015569	G protein-coupled receptor signaling pathway; signal transduction; positive regulation of insulin secretion involved in cellular response to glucose stimulus; positive regulation of phospholipase C-activating G protein-coupled receptor signaling pathway	G protein-coupled receptor activity	membrane; integral component of membrane; plasma membrane
MIPOL1	4.76437e-09	-0.16611	0.088	0.205	0.000174381		protein binding; identical protein binding	nucleus
DLGAP2	4.76703e-09	-0.131715	0.021	0.108	0.000174478	signaling; neuron-neuron synaptic transmission	protein binding	membrane; plasma membrane; cell junction; synapse; postsynaptic membrane; postsynaptic density; neurofilament
VAT1	4.77001e-09	0.247213	0.318	0.22	0.000174587	oxidation-reduction process; neutrophil degranulation; negative regulation of mitochondrial fusion	zinc ion binding; oxidoreductase activity	cytoplasm; membrane; mitochondrion; mitochondrial outer membrane; extracellular region; extracellular exosome; integral component of membrane; azurophil granule lumen
GABRG2	4.98773e-09	-0.196859	0.13	0.265	0.000182556	ion transport; chloride transport; gamma-aminobutyric acid signaling pathway; ion transmembrane transport; signal transduction; chemical synaptic transmission; regulation of membrane potential; nervous system process; chloride transmembrane transport; inhibitory synapse assembly; synaptic transmission, GABAergic; regulation of postsynaptic membrane potential; cellular response to histamine; post-…	ion channel activity; transmembrane signaling receptor activity; GABA-A receptor activity; extracellular ligand-gated ion channel activity; protein binding; chloride channel activity; transmitter-gated ion channel activity involved in regulation of postsynaptic membrane potential; benzodiazepine receptor activity; GABA-gated chloride ion channel activity; inhibitory extracellular ligand-gated ion…	membrane; integral component of membrane; plasma membrane; cell projection; cell junction; cytoplasmic vesicle; synapse; postsynaptic membrane; cytoplasmic vesicle membrane; chloride channel complex; dendrite; integral component of plasma membrane; neuron projection; postsynapse; dendrite membrane; GABA-A receptor complex; axon; GABA-ergic synapse
NDUFB8	5.04421e-09	0.327333	0.771	0.799	0.000184623	oxidation-reduction process; mitochondrial electron transport, NADH to ubiquinone; mitochondrial respiratory chain complex I assembly	NADH dehydrogenase (ubiquinone) activity; NADH dehydrogenase activity	membrane; integral component of membrane; mitochondrion; mitochondrial inner membrane; mitochondrial respiratory chain complex I; respirasome; mitochondrial matrix; endoplasmic reticulum
PRKCB	5.06607e-09	-0.213242	0.088	0.201	0.000185423	lipoprotein transport; protein phosphorylation; phosphorylation; intracellular signal transduction; positive regulation of nucleic acid-templated transcription; chromatin organization; apoptotic process; immune system process; adaptive immune response; regulation of transcription by RNA polymerase II; positive regulation of I-kappaB kinase/NF-kappaB signaling; B cell activation; peptidyl-serine p…	zinc ion binding; metal ion binding; nucleotide binding; protein kinase activity; protein serine/threonine kinase activity; ATP binding; kinase activity; transferase activity; protein binding; protein kinase C activity; nuclear receptor transcription coactivator activity; chromatin binding; histone binding; androgen receptor binding; protein kinase C binding; histone kinase activity (H3-T6 specif…	nucleus; cytoplasm; membrane; cytosol; nucleoplasm; plasma membrane; extracellular exosome; calyx of Held; presynaptic cytosol; presynapse
INHBB	5.17486e-09	-0.171093	0.043	0.14	0.000189405	cell differentiation; defense response; fat cell differentiation; regulation of apoptotic process; cellular response to starvation; SMAD protein signal transduction; positive regulation of pathway-restricted SMAD protein phosphorylation; regulation of MAPK cascade; cell development; cellular response to insulin stimulus; response to wounding; ovarian follicle development; positive regulation of f…	growth factor activity; protein homodimerization activity; cytokine activity; hormone activity; protein binding; transforming growth factor beta receptor binding; host cell surface receptor binding	extracellular region; perinuclear region of cytoplasm; extracellular space; cell periphery
TACC2	5.37921e-09	0.274338	0.415	0.321	0.000196885	microtubule cytoskeleton organization; mitotic spindle organization; cell population proliferation; cerebral cortex development	nuclear hormone receptor binding	nucleus; cytoplasm; cytosol; nucleoplasm; plasma membrane; cytoskeleton; microtubule organizing center
RPL13	5.47584e-09	-0.172851	1	1	0.000200421	translation; viral transcription; translational initiation; nuclear-transcribed mRNA catabolic process, nonsense-mediated decay; SRP-dependent cotranslational protein targeting to membrane	RNA binding; structural constituent of ribosome; protein binding	nucleus; membrane; endoplasmic reticulum; nucleolus; cytosol; ribosome; cytosolic large ribosomal subunit; cytosolic ribosome; intracellular
DNAJB2	5.51235e-09	-0.158079	0.143	0.285	0.000201758	protein refolding; negative regulation of cell population proliferation; positive regulation of proteasomal ubiquitin-dependent protein catabolic process; negative regulation of cell growth; chaperone-mediated protein folding; response to unfolded protein; negative regulation of protein binding; positive regulation of ATPase activity; ubiquitin-dependent ERAD pathway; negative regulation of inclu…	unfolded protein binding; protein binding; chaperone binding; ATPase activator activity; Hsp70 protein binding; ubiquitin binding; ubiquitin-dependent protein binding	nucleus; cytoplasm; membrane; endoplasmic reticulum; endoplasmic reticulum membrane; nuclear membrane; cytosol; intrinsic component of endoplasmic reticulum membrane; proteasome complex
NDUFS5	5.86252e-09	0.183319	0.979	0.973	0.000214574	oxidation-reduction process; mitochondrial respiratory chain complex I assembly; mitochondrial electron transport, NADH to ubiquinone	NADH dehydrogenase (ubiquinone) activity	membrane; mitochondrial inner membrane; mitochondrion; respirasome; mitochondrial intermembrane space; mitochondrial respiratory chain complex I
RRP15	6.07027e-09	-0.225377	0.259	0.415	0.000222178	rRNA processing		preribosome, large subunit precursor
FOXJ3	6.08077e-09	-0.205665	0.269	0.435	0.000222562	regulation of transcription, DNA-templated; positive regulation of transcription by RNA polymerase II	DNA binding; DNA-binding transcription factor activity; sequence-specific DNA binding; DNA-binding transcription activator activity, RNA polymerase II-specific; RNA polymerase II proximal promoter sequence-specific DNA binding; DNA-binding transcription factor activity, RNA polymerase II-specific	nucleus; nuclear chromatin
FAM149A	6.15138e-09	0.204563	0.244	0.15	0.000225147
PREX1	6.18461e-09	-0.189091	0.156	0.293	0.000226363	intracellular signal transduction; regulation of Rho protein signal transduction; G protein-coupled receptor signaling pathway; regulation of small GTPase mediated signal transduction; superoxide metabolic process; actin filament polymerization; positive regulation of apoptotic process; neutrophil activation; T cell differentiation; positive regulation of cell migration; neutrophil chemotaxis; re…	guanyl-nucleotide exchange factor activity; Rho guanyl-nucleotide exchange factor activity; protein binding; GTPase activator activity; enzyme binding; phospholipid binding; Rac guanyl-nucleotide exchange factor activity	cytoplasm; membrane; cytosol; plasma membrane; growth cone; dendritic shaft; perinuclear region of cytoplasm
LINC01578	7.30261e-09	0.267826	0.9	0.876	0.000267283
ATIC	7.40678e-09	-0.18317	0.233	0.388	0.000271096	metabolic process; purine nucleotide biosynthetic process; 'de novo' IMP biosynthetic process; nucleobase-containing compound metabolic process; purine ribonucleoside monophosphate biosynthetic process; brainstem development; nucleoside metabolic process; ribonucleotide metabolic process; response to inorganic substance; cerebellum development; cerebral cortex development; animal organ regenerati…	transferase activity; hydrolase activity; catalytic activity; protein homodimerization activity; cadherin binding; IMP cyclohydrolase activity; phosphoribosylaminoimidazolecarboxamide formyltransferase activity	membrane; cytosol; plasma membrane; extracellular exosome
ATP5PF	7.42086e-09	0.199009	0.964	0.96	0.000271611	ion transport; ATP synthesis coupled proton transport; substantia nigra development; ATP biosynthetic process; cristae formation; mitochondrial ATP synthesis coupled proton transport; positive regulation of heart rate; response to muscle activity; negative regulation of prostaglandin secretion; positive regulation of blood pressure; ATP metabolic process; negative regulation of arachidonic acid s…	proton transmembrane transporter activity; ATPase activity; transmembrane transporter activity; protein-containing complex binding	membrane; mitochondrion; mitochondrial inner membrane; mitochondrial proton-transporting ATP synthase complex, coupling factor F(o); mitochondrial proton-transporting ATP synthase complex; proton-transporting ATP synthase complex, coupling factor F(o); extracellular space; cell surface
DMD	7.61277e-09	-0.15218	0.103	0.223	0.000278635	regulation of release of sequestered calcium ion into cytosol by sarcoplasmic reticulum; regulation of cardiac muscle contraction by regulation of the release of sequestered calcium ion; regulation of heart rate; cytoskeleton organization; muscle organ development; cardiac muscle contraction; negative regulation of peptidyl-serine phosphorylation; cellular protein-containing complex assembly; mus…	zinc ion binding; metal ion binding; actin binding; protein binding; structural constituent of cytoskeleton; dystroglycan binding; myosin binding; structural constituent of muscle; vinculin binding; nitric-oxide synthase binding; integrin binding; lamin binding; PDZ domain binding; protein-containing complex binding	cytoplasm; membrane; plasma membrane; cytoskeleton; cell junction; synapse; postsynaptic membrane; cell surface; cytosol; sarcolemma; protein-containing complex; lateral plasma membrane; Z disc; costamere; dystrophin-associated glycoprotein complex; membrane raft; filopodium; syntrophin complex; cell-substrate junction; filopodium membrane; neuron projection terminus; nucleus; mitochondrial outer…
ACKR3	7.79952e-09	-0.233275	0.113	0.232	0.00028547	G protein-coupled receptor signaling pathway; signal transduction; chemotaxis; angiogenesis; vasculogenesis; cell adhesion; multicellular organism development; immune response; cell chemotaxis; positive regulation of ERK1 and ERK2 cascade; viral process; positive regulation of cytosolic calcium ion concentration; calcium-mediated signaling; negative regulation of intrinsic apoptotic signaling pat…	G protein-coupled receptor activity; coreceptor activity; chemokine binding; protein binding; scavenger receptor activity; C-C chemokine receptor activity; C-C chemokine binding; C-X-C chemokine binding; C-X-C chemokine receptor activity	membrane; integral component of membrane; intracellular membrane-bounded organelle; plasma membrane; cytoplasm; perinuclear region of cytoplasm; clathrin-coated pit; cell surface; external side of plasma membrane; endosome; early endosome; recycling endosome; nucleus
NTS	7.99611e-09	1.05048	0.173	0.09	0.000292666	signal transduction; G protein-coupled receptor signaling pathway	neuropeptide hormone activity; protein binding	extracellular region; cytoplasmic vesicle; transport vesicle; axon terminus
TCF12	8.18943e-09	0.295084	0.447	0.353	0.000299741	multicellular organism development; positive regulation of gene expression; positive regulation of neuron differentiation; positive regulation of transcription, DNA-templated; positive regulation of transcription by RNA polymerase II; cell differentiation; nervous system development; regulation of hematopoietic stem cell differentiation; immune response; regulation of transcription by RNA polymer…	transcription regulatory region DNA binding; protein dimerization activity; DNA binding; protein binding; cAMP response element binding; protein heterodimerization activity; E-box binding; HMG box domain binding; DNA-binding transcription factor activity; RNA polymerase II proximal promoter sequence-specific DNA binding; DNA-binding transcription factor activity, RNA polymerase II-specific; DNA-b…	cytoplasm; nucleus; nuclear speck; intracellular membrane-bounded organelle; nucleoplasm; transcription factor complex; nuclear chromatin; RNA polymerase II transcription factor complex
ADAMTS5	8.59817e-09	-0.14879	0.043	0.14	0.000314701	proteolysis; negative regulation of cold-induced thermogenesis; extracellular matrix disassembly; defense response to bacterium; tooth eruption	zinc ion binding; metal ion binding; hydrolase activity; protein binding; peptidase activity; metalloendopeptidase activity; metallopeptidase activity; integrin binding; heparin binding; extracellular matrix binding	extracellular region; collagen-containing extracellular matrix; endoplasmic reticulum lumen; extracellular matrix; extracellular space
CEP85L	8.71508e-09	-0.208622	0.329	0.497	0.000318981			cytoplasm; cytoskeleton; centrosome; microtubule organizing center
NUCB2	8.71974e-09	-0.216117	0.643	0.78	0.000319151	negative regulation of appetite	calcium ion binding; metal ion binding; DNA binding; protein binding	nucleus; cytoplasm; membrane; endoplasmic reticulum; Golgi apparatus; extracellular space; extracellular region; endoplasmic reticulum-Golgi intermediate compartment; extracellular exosome; plasma membrane; nuclear envelope; cytosol; nuclear outer membrane
RAMP2	8.78753e-09	-0.167689	0.105	0.225	0.000321632	intracellular protein transport; regulation of G protein-coupled receptor signaling pathway; protein transport; G protein-coupled receptor signaling pathway; response to hypoxia; sprouting angiogenesis; heart development; female pregnancy; regulation of blood pressure; positive regulation of gene expression; receptor internalization; response to estradiol; response to progesterone; cellular respo…	coreceptor activity; obsolete protein transporter activity; protein binding; amylin receptor activity; adrenomedullin receptor activity; adrenomedullin binding	cell; membrane; integral component of membrane; cytoplasm; plasma membrane; cell surface; receptor complex; lysosome; integral component of plasma membrane; clathrin-coated pit; amylin receptor complex 2; adrenomedullin receptor complex
CBX1	9.40791e-09	0.258515	0.853	0.837	0.000344339	cellular response to DNA damage stimulus; negative regulation of transcription, DNA-templated	protein binding; enzyme binding; chromatin binding; identical protein binding; protein homodimerization activity; histone methyltransferase binding	nucleus; spindle; chromosome, centromeric region; nuclear chromosome, telomeric region; chromatin; nucleoplasm; site of DNA damage; nuclear heterochromatin; female pronucleus; male pronucleus; pericentric heterochromatin; chromocenter
TTYH1	9.572e-09	-0.190721	0.182	0.327	0.000350345	cell adhesion; ion transport; chloride transport; chloride transmembrane transport; ion transmembrane transport; iron ion transport; iron ion transmembrane transport; mitotic cell cycle; cell-substrate adhesion; filopodium assembly; cell-cell adhesion	protein binding; chloride channel activity; intracellular calcium activated chloride channel activity; iron ion transmembrane transporter activity; volume-sensitive chloride channel activity; calcium ion binding	membrane; integral component of membrane; plasma membrane; chloride channel complex; smooth endoplasmic reticulum membrane; filopodium membrane; filopodium tip; synapse
CELF4	9.60725e-09	-0.28197	0.607	0.755	0.000351635	mRNA processing; RNA splicing; regulation of alternative mRNA splicing, via spliceosome; embryo development ending in birth or egg hatching; mRNA splice site selection; germ cell development; positive regulation of mRNA splicing, via spliceosome; negative regulation of translation; alternative mRNA splicing, via spliceosome; in utero embryonic development; negative regulation of mRNA splicing, vi…	nucleic acid binding; RNA binding; mRNA binding; pre-mRNA binding; translation repressor activity, mRNA regulatory element binding; BRE binding	nucleus; cytoplasm; ribonucleoprotein complex
ADGRB2	9.71658e-09	-0.17854	0.179	0.323	0.000355637	G protein-coupled receptor signaling pathway; signal transduction; cell surface receptor signaling pathway; negative regulation of angiogenesis; peripheral nervous system development; adenylate cyclase-activating G protein-coupled receptor signaling pathway; calcineurin-NFAT signaling cascade; positive regulation of synapse assembly	G protein-coupled receptor activity; transmembrane signaling receptor activity; protein binding	membrane; integral component of membrane; centrosome; plasma membrane; integral component of plasma membrane
AC124798.1	1.03119e-08	-0.115847	0.019	0.101	0.000377427
GPRC5B	1.04038e-08	0.234073	0.212	0.124	0.000380791	G protein-coupled receptor signaling pathway; signal transduction; activation of protein kinase activity; positive regulation of inflammatory response; positive regulation of protein tyrosine kinase activity; positive regulation of I-kappaB kinase/NF-kappaB signaling; positive regulation of canonical Wnt signaling pathway; positive regulation of macrophage cytokine production; positive regulation…	G protein-coupled receptor activity; protein kinase binding; G protein-coupled receptor binding; protein kinase activator activity	membrane; integral component of membrane; intracellular membrane-bounded organelle; nucleus; nucleolus; cytosol; plasma membrane; extracellular space; cytoplasmic vesicle; cytoplasmic vesicle membrane; cell surface; receptor complex; extracellular exosome
MAGEF1	1.22256e-08	-0.170434	0.382	0.561	0.000447467	protein ubiquitination; negative regulation of double-strand break repair via homologous recombination; positive regulation of ubiquitin-dependent protein catabolic process; protein maturation by iron-sulfur cluster transfer	protein binding
OTULINL	1.22451e-08	0.150592	0.158	0.081	0.000448184	proteolysis		nucleus; cytoplasm; membrane; endoplasmic reticulum; endoplasmic reticulum membrane; nuclear envelope; extrinsic component of endoplasmic reticulum membrane
PCBP4	1.23558e-08	0.299061	0.395	0.304	0.000452234	DNA damage response, signal transduction by p53 class mediator resulting in cell cycle arrest; regulation of mRNA stability	nucleic acid binding; RNA binding; DNA binding; mRNA 3'-UTR binding	cytoplasm; cytosol
FAM171B	1.24322e-08	-0.206237	0.464	0.635	0.000455032			membrane; integral component of membrane
NDST3	1.26579e-08	0.242098	0.278	0.175	0.000463292	metabolic process; heparan sulfate proteoglycan biosynthetic process; heparin biosynthetic process; heparan sulfate proteoglycan biosynthetic process, polysaccharide chain biosynthetic process	transferase activity; hydrolase activity; catalytic activity; sulfotransferase activity; deacetylase activity; [heparan sulfate]-glucosamine N-sulfotransferase activity; heparan sulfate N-acetylglucosaminyltransferase activity	membrane; integral component of membrane; Golgi apparatus; Golgi membrane
ANKS1B	1.31885e-08	-0.213414	0.269	0.424	0.000482712	regulation of synaptic plasticity by receptor localization to synapse	ephrin receptor binding; protein binding	nucleus; cytoplasm; membrane; intracellular membrane-bounded organelle; cytosol; plasma membrane; cell projection; cell junction; synapse; postsynaptic membrane; postsynaptic density; dendritic spine; Cajal body
NDUFS6	1.34184e-08	0.240971	0.835	0.819	0.000491126	oxidation-reduction process; mitochondrial electron transport, NADH to ubiquinone; mitochondrial respiratory chain complex I assembly; fatty acid metabolic process; muscle contraction; multicellular organism aging; respiratory electron transport chain; multicellular organism growth; reproductive system development; mitochondrion morphogenesis; cardiovascular system development	NADH dehydrogenase (ubiquinone) activity; electron transfer activity	membrane; mitochondrial inner membrane; mitochondrion; mitochondrial respiratory chain complex I; respirasome
RAP2A	1.43912e-08	-0.256907	0.303	0.463	0.000526733	signal transduction; Rap protein signal transduction; positive regulation of protein phosphorylation; cellular response to drug; microvillus assembly; protein localization to plasma membrane; actin cytoskeleton reorganization; negative regulation of cell migration; regulation of dendrite morphogenesis; regulation of JNK cascade; positive regulation of protein autophosphorylation; cellular protein…	nucleotide binding; GTPase activity; GTP binding; protein binding; GDP binding; magnesium ion binding	membrane; plasma membrane; midbody; endosome; recycling endosome; recycling endosome membrane; cytosol
FAM217B	1.45464e-08	-0.199867	0.368	0.53	0.000532413			cytosol; nucleoplasm
RIMS3	1.4745e-08	0.167594	0.19	0.106	0.000539683	exocytosis; regulation of membrane potential; calcium ion-regulated exocytosis of neurotransmitter; neurotransmitter transport; positive regulation of synaptic transmission; regulation of synaptic vesicle exocytosis; calcium-ion regulated exocytosis; regulation of synaptic plasticity	Rab GTPase binding; ion channel binding	membrane; cell junction; synapse; presynaptic membrane; presynaptic active zone; presynaptic active zone cytoplasmic component; cytoskeleton of presynaptic active zone
GNAO1	1.48174e-08	-0.229615	0.543	0.692	0.000542333	G protein-coupled receptor signaling pathway; signal transduction; adenylate cyclase-modulating G protein-coupled receptor signaling pathway; protein folding; muscle contraction; Wnt signaling pathway, calcium modulating pathway; dopamine receptor signaling pathway; aging; locomotory behavior; regulation of heart contraction; cellular process; response to organonitrogen compound; response to orga…	metal ion binding; nucleotide binding; GTPase activity; GTP binding; guanyl nucleotide binding; G-protein beta/gamma-subunit complex binding; G protein-coupled receptor binding; G protein-coupled serotonin receptor binding; mu-type opioid receptor binding; corticotropin-releasing hormone receptor 1 binding; signaling receptor binding; GTPase activating protein binding; protein-containing complex …	membrane; plasma membrane; heterotrimeric G-protein complex; dendrite; protein-containing complex; neuron projection; myelin sheath; cell body
EPN2	1.53142e-08	-0.175453	0.372	0.537	0.000560516	endocytosis; negative regulation of sprouting angiogenesis; positive regulation of Notch signaling pathway; membrane organization; negative regulation of vascular endothelial growth factor receptor signaling pathway	lipid binding; protein binding; cadherin binding	clathrin coat of endocytic vesicle; cytoplasm; intracellular membrane-bounded organelle; cytoplasmic vesicle; clathrin-coated vesicle; cytosol
PRKY	1.56828e-08	-0.241621	0.199	0.34	0.000574006	protein phosphorylation; phosphorylation; signal transduction; peptidyl-serine phosphorylation	nucleotide binding; protein kinase activity; protein serine/threonine kinase activity; ATP binding; kinase activity; transferase activity; cAMP-dependent protein kinase activity	cAMP-dependent protein kinase complex
PRDX2	1.57164e-08	0.201004	0.968	0.963	0.000575238	oxidation-reduction process; cell redox homeostasis; cellular oxidant detoxification; negative regulation of apoptotic process; regulation of apoptotic process; response to oxidative stress; removal of superoxide radicals; cellular response to oxidative stress; hydrogen peroxide catabolic process; activation of MAPK activity; respiratory burst involved in inflammatory response; regulation of hydr…	oxidoreductase activity; antioxidant activity; protein binding; peroxidase activity; peroxiredoxin activity; thioredoxin peroxidase activity	cell; cytoplasm; cytosol; extracellular exosome
EIF1B	1.59235e-08	0.256568	0.936	0.929	0.000582817	translation; translational initiation; regulation of translational initiation	RNA binding; translation initiation factor activity; protein binding; ribosomal small subunit binding	eukaryotic 43S preinitiation complex
LY6E	1.6423e-08	-0.206041	0.295	0.451	0.000601099	negative regulation of signaling receptor activity; cell surface receptor signaling pathway	acetylcholine receptor inhibitor activity	membrane; plasma membrane; extracellular region; anchored component of membrane
SPTAN1	1.71416e-08	-0.195049	0.739	0.85	0.000627399	actin filament capping; cytoskeleton organization; MAPK cascade; neutrophil degranulation; axon guidance; endoplasmic reticulum to Golgi vesicle-mediated transport	metal ion binding; calcium ion binding; actin binding; protein binding; calmodulin binding; cadherin binding; structural constituent of cytoskeleton	cytoplasm; intracellular membrane-bounded organelle; microtubule cytoskeleton; cytoskeleton; extracellular region; cytosol; extracellular exosome; cell cortex; membrane; specific granule lumen; tertiary granule lumen; extracellular vesicle; spectrin
COIL	1.73242e-08	-0.199716	0.299	0.467	0.000634082	spliceosomal snRNP assembly	protein binding; identical protein binding; protein C-terminus binding; U1 snRNA binding; U2 snRNA binding	nucleus; membrane; fibrillar center; nuclear body; nucleoplasm; nucleolus; Cajal body
NKAIN3-IT1	1.73404e-08	0.26475	0.237	0.144	0.000634674
AC010642.2	1.73983e-08	0.268051	0.511	0.417	0.000636796
MT1F	1.76747e-08	0.231941	0.169	0.09	0.000646913	negative regulation of growth; cellular zinc ion homeostasis; detoxification of copper ion; cellular response to cadmium ion; cellular response to copper ion; cellular response to zinc ion	metal ion binding; zinc ion binding; protein binding	nucleus; cytoplasm; perinuclear region of cytoplasm
RPL30	1.81653e-08	-0.163692	0.998	0.999	0.000664869	translation; cytoplasmic translation; defense response to Gram-negative bacterium; viral transcription; antimicrobial humoral immune response mediated by antimicrobial peptide; translational initiation; nuclear-transcribed mRNA catabolic process, nonsense-mediated decay; killing of cells of other organism; SRP-dependent cotranslational protein targeting to membrane	RNA binding; structural constituent of ribosome; protein binding	nucleus; membrane; ribosome; postsynaptic density; cytosolic large ribosomal subunit; focal adhesion; cytosol; extracellular exosome; polysomal ribosome; intracellular
SMARCD3	1.82705e-08	-0.183341	0.177	0.317	0.00066872	chromatin organization; positive regulation of transcription, DNA-templated; transcription, DNA-templated; nervous system development; nucleosome disassembly; chromatin remodeling; regulation of transcription by RNA polymerase II; regulation of lipid metabolic process; positive regulation of neuroblast proliferation; neural retina development; heart morphogenesis; secondary heart field specificat…	signaling receptor binding; transcription factor binding; transcription coactivator activity; nuclear hormone receptor binding; chromatin binding; protein binding	nucleus; nucleoplasm; SWI/SNF complex; npBAF complex; nBAF complex; nuclear chromatin
SNN	1.87107e-08	0.297513	0.374	0.283	0.000684831	response to toxic substance	metal ion binding	membrane; integral component of membrane; mitochondrion; mitochondrial outer membrane; cytoplasm
DOCK3	1.87995e-08	-0.14715	0.075	0.182	0.00068808	small GTPase mediated signal transduction; positive regulation of non-membrane spanning protein tyrosine kinase activity	guanyl-nucleotide exchange factor activity; protein binding; SH3 domain binding; Rac guanyl-nucleotide exchange factor activity	cytoplasm; cytosol
FXYD6	1.96032e-08	-0.309956	0.816	0.863	0.000717498	ion transport; regulation of ion transport; regulation of sodium ion transmembrane transporter activity; ion transmembrane transport; regulation of cardiac conduction	protein binding; ion channel regulator activity; sodium channel regulator activity	membrane; integral component of membrane; plasma membrane; glutamatergic synapse; integral component of postsynaptic membrane; integral component of presynaptic membrane
DPF1	1.99432e-08	-0.199352	0.314	0.474	0.00072994	nervous system development; positive regulation of transcription by RNA polymerase II; histone acetylation; negative regulation of transcription, DNA-templated; apoptotic process	zinc ion binding; metal ion binding; histone binding; histone acetyltransferase activity; nucleic acid binding	nucleus; cytoplasm; nBAF complex; nuclear chromatin; histone acetyltransferase complex
GADD45A	2.05182e-08	0.2327	0.333	0.233	0.000750986	cellular response to DNA damage stimulus; cell cycle; regulation of cell cycle; DNA damage response, signal transduction by p53 class mediator resulting in cell cycle arrest; cell cycle arrest; positive regulation of apoptotic process; cellular response to mechanical stimulus; apoptotic process; positive regulation of JNK cascade; DNA repair; positive regulation of p38MAPK cascade; regulation of …	protein binding; protein heterodimerization activity; protein homodimerization activity; kinase binding; protein N-terminus binding; RNA polymerase II core promoter sequence-specific DNA binding	nucleus; cytoplasm; nuclear speck; nucleoplasm
SLC43A2	2.12664e-08	-0.202136	0.212	0.351	0.00077837	transmembrane transport; amino acid transmembrane transport; amino acid transport; L-amino acid transport; L-alpha-amino acid transmembrane transport; neutral amino acid transport	L-amino acid transmembrane transporter activity; amino acid transmembrane transporter activity; neutral amino acid transmembrane transporter activity	membrane; integral component of membrane; integral component of plasma membrane; plasma membrane
PKIA	2.15036e-08	0.245426	0.818	0.762	0.000787055	negative regulation of cAMP-dependent protein kinase activity; phosphorylation; negative regulation of transcription by RNA polymerase II; negative regulation of protein kinase activity; regulation of G2/M transition of mitotic cell cycle; negative regulation of protein import into nucleus; negative regulation of catalytic activity; negative regulation of protein serine/threonine kinase activity	kinase activity; protein binding; protein kinase inhibitor activity; cAMP-dependent protein kinase inhibitor activity; protein kinase A catalytic subunit binding	nucleus; cytoplasm
QSER1	2.23077e-08	0.287968	0.427	0.337	0.000816485
SOD1	2.28805e-08	0.264643	0.865	0.878	0.00083745	oxidation-reduction process; cellular iron ion homeostasis; spermatogenesis; superoxide metabolic process; placenta development; retina homeostasis; positive regulation of cytokine production; embryo implantation; positive regulation of apoptotic process; sensory perception of sound; regulation of blood pressure; negative regulation of neuron apoptotic process; interleukin-12-mediated signaling p…	metal ion binding; oxidoreductase activity; zinc ion binding; protein homodimerization activity; protein binding; identical protein binding; copper ion binding; superoxide dismutase activity; chaperone binding; Rac GTPase binding; antioxidant activity; enzyme binding; protein phosphatase 2B binding	nucleus; cytoplasm; cytosol; nucleoplasm; mitochondrion; mitochondrial matrix; extracellular space; axon cytoplasm; plasma membrane; cytoplasmic vesicle; extracellular region; peroxisome; extracellular exosome; protein-containing complex; mitochondrial intermembrane space; neuronal cell body; lysosome; secretory granule; dense core granule; dendrite cytoplasm; neuron projection
NME2	2.42456e-08	-0.230163	0.887	0.922	0.000887412	phosphorylation; integrin-mediated signaling pathway; nucleoside diphosphate phosphorylation; GTP biosynthetic process; UTP biosynthetic process; CTP biosynthetic process; nucleotide metabolic process; positive regulation of transcription, DNA-templated; positive regulation of transcription by RNA polymerase II; neutrophil degranulation; purine nucleotide metabolic process; pyrimidine nucleotide …	metal ion binding; nucleotide binding; ATP binding; kinase activity; transferase activity; DNA binding; protein binding; nucleoside diphosphate kinase activity; transcription coactivator activity; GDP binding; protein histidine kinase activity; G-quadruplex DNA binding; protein serine/threonine kinase activity; fatty acid binding; drug binding; intermediate filament binding; enzyme binding	nucleus; cytoplasm; cell projection; extracellular region; cytosol; lamellipodium; extracellular exosome; cell periphery; ruffle; secretory granule lumen; ficolin-1-rich granule lumen; intermediate filament; mitochondrial membrane; perinuclear region of cytoplasm
FGF18	2.47357e-08	-0.147141	0.036	0.125	0.000905353	positive regulation of blood vessel endothelial cell migration; positive regulation of angiogenesis; fibroblast growth factor receptor signaling pathway; MAPK cascade; signal transduction; cell-cell signaling; positive regulation of protein kinase B signaling; anatomical structure morphogenesis; positive regulation of endothelial cell chemotaxis to fibroblast growth factor; positive regulation of…	growth factor activity; fibroblast growth factor receptor binding; type 2 fibroblast growth factor receptor binding; type 1 fibroblast growth factor receptor binding	extracellular region; extracellular space; nucleolus
DPYSL2	2.48886e-08	0.237548	0.891	0.883	0.000910948	axon guidance; brain development; cytoskeleton organization; regulation of axon extension; regulation of neuron differentiation; multicellular organism development; cell differentiation; nervous system development; endocytosis; nucleobase-containing compound metabolic process; signal transduction; response to amphetamine; regulation of neuron projection development; positive regulation of glutama…	hydrolase activity, acting on carbon-nitrogen (but not peptide) bonds; microtubule binding; hydrolase activity; protein binding; identical protein binding; hydrolase activity, acting on carbon-nitrogen (but not peptide) bonds, in cyclic amides; dihydropyrimidinase activity; protein kinase binding	cytoplasm; membrane; cytosol; plasma membrane; cytoskeleton; microtubule; extracellular exosome; axon; dendrite; growth cone; protein-containing complex; neuron projection; neuronal cell body; terminal bouton; myelin sheath; presynapse
PXMP2	2.52454e-08	0.230612	0.239	0.152	0.000924007		protein binding	cytoplasm; membrane; integral component of membrane; peroxisome; peroxisomal membrane; protein-containing complex
PBX1	2.54042e-08	-0.185558	0.78	0.871	0.000929819	regulation of transcription, DNA-templated; steroid biosynthetic process; multicellular organism development; cell differentiation; urogenital system development; branching involved in ureteric bud morphogenesis; positive regulation of cell population proliferation; animal organ morphogenesis; anterior/posterior pattern specification; proximal/distal pattern formation; positive regulation of G2/M…	DNA-binding transcription factor activity; DNA binding; sequence-specific DNA binding; protein binding; RNA polymerase II proximal promoter sequence-specific DNA binding; DNA-binding transcription activator activity, RNA polymerase II-specific; protein heterodimerization activity; DNA-binding transcription factor activity, RNA polymerase II-specific; RNA polymerase II regulatory region sequence-s…	nucleus; nucleoplasm; cytoplasm; transcription factor complex; nuclear chromatin; RNA polymerase II transcription factor complex
BZW2	2.72958e-08	0.292945	0.726	0.703	0.000999053	multicellular organism development; cell differentiation; nervous system development	protein binding; cadherin binding	cytoplasm; membrane
GSTM3	2.78504e-08	-0.244792	0.472	0.62	0.00101935	glutathione metabolic process; response to estrogen; glutathione derivative biosynthetic process; nitrobenzene metabolic process; xenobiotic catabolic process; cellular detoxification of nitrogen compound; establishment of blood-nerve barrier	transferase activity; protein binding; glutathione transferase activity; identical protein binding; protein homodimerization activity; enzyme binding; glutathione binding	cytoplasm; nucleus; cytosol; intercellular bridge; extracellular exosome; sperm fibrous sheath
DUSP23	2.8425e-08	-0.130877	0.071	0.174	0.00104038	protein dephosphorylation; dephosphorylation; peptidyl-tyrosine dephosphorylation	hydrolase activity; phosphoprotein phosphatase activity; protein binding; protein tyrosine phosphatase activity; phosphatase activity; protein tyrosine/serine/threonine phosphatase activity	nucleus; cytoplasm; nucleoplasm; cytosol
N4BP2L2	2.86815e-08	-0.201942	0.718	0.843	0.00104977	negative regulation of transcription by RNA polymerase II; positive regulation of hematopoietic stem cell proliferation; negative regulation of hematopoietic stem cell differentiation	protein binding; transcription corepressor activity; enzyme binding	nucleus; extracellular exosome; transcriptional repressor complex
SCARB2	2.97765e-08	0.255136	0.669	0.615	0.00108985	positive regulation of neuron projection development; viral entry into host cell; protein targeting to lysosome; receptor-mediated endocytosis; aminophospholipid transport; regulation of cellular carbohydrate catabolic process; regulation of glucosylceramidase activity; viral process; membrane organization; regulation of endosome organization; regulation of lysosome organization; endocytosis	scavenger receptor activity; phosphatidylserine binding; phospholipid transporter activity; cholesterol binding; enzyme binding; phosphatidylcholine binding; cargo receptor activity; protein homodimerization activity; chaperone binding; protein binding; virus receptor activity; transmembrane signaling receptor activity	plasma membrane; membrane; integral component of membrane; lysosomal membrane; lysosome; focal adhesion; endocytic vesicle membrane; lysosomal lumen; extracellular exosome; clathrin-coated vesicle membrane; endosome membrane; Golgi membrane; endoplasmic reticulum membrane; late endosome membrane
MAGI1	3.16418e-08	0.241695	0.226	0.139	0.00115812	signal transduction; cell adhesion; cell surface receptor signaling pathway; protein-containing complex assembly; positive regulation of cell-cell adhesion	nucleotide binding; ATP binding; protein binding; molecular adaptor activity; protein C-terminus binding; alpha-actinin binding	cytoplasm; plasma membrane; membrane; nucleoplasm; cell junction; cell projection; bicellular tight junction; cell-cell junction; adherens junction; cell periphery; nucleus
ZC2HC1A	3.17333e-08	0.262497	0.793	0.752	0.00116147		metal ion binding; protein binding
VRK1	3.21419e-08	-0.212432	0.248	0.389	0.00117643	protein phosphorylation; phosphorylation; cell division; cell cycle; peptidyl-serine phosphorylation; protein autophosphorylation; mitotic nuclear envelope reassembly; histone H3-S10 phosphorylation; mitotic nuclear envelope disassembly; Golgi disassembly; histone H3-T3 phosphorylation	nucleotide binding; protein kinase activity; protein serine/threonine kinase activity; ATP binding; kinase activity; transferase activity; protein binding; protein kinase binding; histone kinase activity (H3-T3 specific); nucleosomal histone binding; histone kinase activity (H3-S10 specific)	nucleus; cytoplasm; nucleolus; cytosol; nucleoplasm; cytoskeleton; Golgi stack; spindle; membrane; integral component of membrane
NTRK2	3.27578e-08	-0.158817	0.034	0.12	0.00119897	positive regulation of protein phosphorylation; protein phosphorylation; phosphorylation; transmembrane receptor protein tyrosine kinase signaling pathway; peptidyl-tyrosine phosphorylation; multicellular organism development; cell differentiation; nervous system development; positive regulation of gene expression; positive regulation of MAPK cascade; cerebral cortex development; positive regulat…	nucleotide binding; protein kinase activity; ATP binding; kinase activity; transferase activity; protein tyrosine kinase activity; transmembrane receptor protein tyrosine kinase activity; protein homodimerization activity; protein binding; neurotrophin receptor activity; neurotrophin binding; brain-derived neurotrophic factor binding; brain-derived neurotrophic factor-activated receptor activity	cytoplasm; membrane; integral component of membrane; integral component of plasma membrane; plasma membrane; cell projection; perinuclear region of cytoplasm; cell junction; synapse; postsynaptic membrane; dendrite; endosome; early endosome; receptor complex; axon; early endosome membrane; endosome membrane; postsynaptic density; Golgi membrane; axon terminus; dendritic spine; cytosol; terminal b…
C1orf54	3.30685e-08	-0.225343	0.162	0.288	0.00121034			extracellular region
PPP2R2C	3.44208e-08	-0.138529	0.075	0.179	0.00125984	regulation of phosphoprotein phosphatase activity; mitotic cell cycle; peptidyl-serine dephosphorylation	protein binding; protein phosphatase regulator activity; protein serine/threonine phosphatase activity	protein phosphatase type 2A complex; cytosol
NUDT14	3.4675e-08	-0.147233	0.19	0.333	0.00126914	protein N-linked glycosylation via asparagine; nucleoside phosphate metabolic process; ribose phosphate metabolic process	hydrolase activity; metal ion binding; protein binding; identical protein binding; hydrolase activity, acting on acid anhydrides, in phosphorus-containing anhydrides; UDP-sugar diphosphatase activity; ADP-ribose diphosphatase activity	cytoplasm; cytosol
GRIK5	3.50383e-08	-0.1796	0.152	0.278	0.00128244	ion transport; ion transmembrane transport; ionotropic glutamate receptor signaling pathway; modulation of chemical synaptic transmission; synaptic transmission, glutamatergic; protein retention in ER lumen; chemical synaptic transmission; regulation of synaptic vesicle fusion to presynaptic active zone membrane; regulation of membrane potential; receptor clustering; positive regulation of neuron…	ion channel activity; signaling receptor activity; ionotropic glutamate receptor activity; ligand-gated ion channel activity; glutamate receptor activity; transmitter-gated ion channel activity involved in regulation of postsynaptic membrane potential; kainate selective glutamate receptor activity; SH3 domain binding; PDZ domain binding; identical protein binding	membrane; integral component of membrane; nucleus; plasma membrane; cell junction; synapse; postsynaptic membrane; presynaptic membrane; postsynaptic density membrane; kainate selective glutamate receptor complex; endoplasmic reticulum; ionotropic glutamate receptor complex; postsynaptic density; axon; dendrite; neuron projection; neuronal cell body; terminal bouton; perikaryon; hippocampal mossy…
PRR7	3.51009e-08	-0.182876	0.246	0.398	0.00128473	T cell differentiation; negative regulation of protein ubiquitination; postsynapse to nucleus signaling pathway; immune system process; adaptive immune response; positive regulation of apoptotic process; positive regulation of cysteine-type endopeptidase activity involved in apoptotic signaling pathway; positive regulation of cell death	protein-containing complex binding; protein binding; ubiquitin-like protein ligase binding; protein tyrosine kinase binding; long-chain fatty acid binding	membrane; integral component of membrane; nucleus; cytoplasm; plasma membrane; cell projection; perinuclear region of cytoplasm; cell junction; synapse; postsynaptic membrane; postsynaptic density; neuron projection; glutamatergic synapse; postsynaptic density, intracellular component; dendrite
NSG1	3.5433e-08	0.220708	0.921	0.898	0.00129688	apoptotic process; clathrin coat assembly; dopamine receptor signaling pathway; receptor recycling; positive regulation of receptor recycling; endosomal transport; amyloid precursor protein metabolic process; spontaneous synaptic transmission; neurotransmitter receptor transport, endosome to postsynaptic membrane; vesicle-mediated transport in synapse; neurotransmitter receptor cycle; postsynapti…	protein binding; clathrin light chain binding; signaling receptor binding	membrane; integral component of membrane; endoplasmic reticulum; endoplasmic reticulum membrane; Golgi apparatus; cell projection; cytoplasmic vesicle; cytoplasmic vesicle membrane; lysosome; dendrite; endosome; late endosome membrane; Golgi cisterna membrane; early endosome membrane; endosome membrane; late endosome; recycling endosome membrane; early endosome; lateral plasma membrane; trans-Gol…
MED13L	3.69839e-08	-0.211685	0.603	0.747	0.00135365	regulation of transcription by RNA polymerase II	transcription coregulator activity	nucleus; mediator complex
ANKRD28	3.72274e-08	-0.143223	0.184	0.323	0.00136256	COPII vesicle coating	protein binding	nucleus; nucleoplasm; Golgi membrane; cytosol
WDFY3-AS2	3.75666e-08	0.137343	0.107	0.046	0.00137498
CCSER1	4.06601e-08	-0.19148	0.177	0.31	0.0014882
TMTC4	4.10465e-08	0.244242	0.329	0.238	0.00150234	protein glycosylation; protein O-linked mannosylation	transferase activity; mannosyltransferase activity; dolichyl-phosphate-mannose-protein mannosyltransferase activity; protein binding	membrane; integral component of membrane; endoplasmic reticulum
GALNT11	4.14054e-08	-0.202335	0.408	0.575	0.00151548	protein glycosylation; Notch signaling pathway; cilium assembly; regulation of Notch signaling pathway; O-glycan processing; determination of left/right symmetry; Notch receptor processing; protein O-linked glycosylation via threonine; Notch signaling involved in heart development	metal ion binding; transferase activity; carbohydrate binding; transferase activity, transferring glycosyl groups; Notch binding; polypeptide N-acetylgalactosaminyltransferase activity	membrane; integral component of membrane; Golgi apparatus; Golgi membrane
SOCS2	4.49768e-08	0.183538	0.169	0.092	0.0016462	protein ubiquitination; intracellular signal transduction; positive regulation of signal transduction; regulation of phosphatidylinositol 3-kinase activity; regulation of cell growth; negative regulation of receptor signaling pathway via JAK-STAT; regulation of growth; post-translational protein modification; phosphatidylinositol phosphorylation; negative regulation of apoptotic process; receptor…	protein binding; insulin-like growth factor receptor binding; JAK pathway signal transduction adaptor activity; 1-phosphatidylinositol-3-kinase regulator activity; SH3/SH2 adaptor activity; growth hormone receptor binding	cytoplasm; cytosol; phosphatidylinositol 3-kinase complex
LAGE3	4.56996e-08	-0.17135	0.378	0.542	0.00167265	tRNA processing; positive regulation of transcription by RNA polymerase II; tRNA threonylcarbamoyladenosine metabolic process	protein binding	nucleus; cytoplasm; nucleoplasm; nuclear body; EKC/KEOPS complex
CCDC107	4.57746e-08	-0.19724	0.455	0.613	0.0016754			membrane; integral component of membrane
CCDC88A	4.65617e-08	0.286494	0.893	0.883	0.00170421	cell migration; regulation of actin cytoskeleton organization; DNA replication; nervous system development; cell projection organization; cytoskeleton-dependent intracellular transport; cytoplasmic microtubule organization; regulation of cell population proliferation; lamellipodium assembly; activation of protein kinase B activity; regulation of protein phosphorylation; positive regulation of cil…	actin binding; protein binding; protein homodimerization activity; microtubule binding; phosphatidylinositol binding; dynein light intermediate chain binding; protein kinase B binding; G-protein gamma-subunit binding	cytoplasm; membrane; endoplasmic reticulum; Golgi apparatus; cytosol; plasma membrane; cytoskeleton; cell projection; cytoplasmic vesicle; ciliary basal body; lamellipodium; centriole; centrosome; COPI-coated Golgi to ER transport vesicle; cell leading edge
CKB	4.77263e-08	0.185322	0.989	0.982	0.00174683	phosphorylation; phosphocreatine biosynthetic process; substantia nigra development; creatine metabolic process; brain development; cerebellum development; cellular chloride ion homeostasis	nucleotide binding; ATP binding; kinase activity; transferase activity; catalytic activity; transferase activity, transferring phosphorus-containing groups; protein binding; creatine kinase activity; ubiquitin protein ligase binding	cytoplasm; cytosol; extracellular space; extracellular exosome; nucleus; dendrite; neuronal cell body
DIXDC1	4.78995e-08	-0.192149	0.342	0.499	0.00175317	multicellular organism development; Wnt signaling pathway; canonical Wnt signaling pathway; cerebral cortex cell migration; cerebral cortex radially oriented cell migration; cell proliferation in forebrain; forebrain ventricular zone progenitor cell division; positive regulation of Wnt signaling pathway; regulation of actin cytoskeleton organization; negative regulation of neuron differentiation;…	actin binding; protein binding; gamma-tubulin binding; protein domain specific binding	cytoplasm; cytosol; cytoskeleton; cell junction; focal adhesion
MTAP	4.8333e-08	0.168055	0.132	0.065	0.00176904	nucleoside metabolic process; purine ribonucleoside salvage; L-methionine salvage from methylthioadenosine; nucleobase-containing compound metabolic process; interleukin-12-mediated signaling pathway	transferase activity; catalytic activity; transferase activity, transferring glycosyl groups; protein binding; transferase activity, transferring pentosyl groups; S-methyl-5-thioadenosine phosphorylase activity; phosphorylase activity; purine-nucleoside phosphorylase activity	nucleus; cytoplasm; cytosol; extracellular exosome
ARRDC4	4.8482e-08	-0.168388	0.128	0.248	0.00177449	protein transport; protein ubiquitination; extracellular vesicle biogenesis; positive regulation of ubiquitin-protein transferase activity	protein binding; protein binding, bridging involved in substrate recognition for ubiquitination	membrane; plasma membrane; cytoplasmic vesicle; extracellular vesicle; endosome; early endosome
SGSM3	4.96793e-08	-0.142525	0.179	0.318	0.00181831	cell cycle; intracellular protein transport; activation of GTPase activity; positive regulation of GTPase activity; cell cycle arrest; positive regulation of protein catabolic process; Rap protein signal transduction; plasma membrane to endosome transport; regulation of Rab protein signal transduction	GTPase activator activity; Rab GTPase binding; protein binding	cytoplasm; cytosol; gap junction
CCDC167	5.28445e-08	0.307626	0.645	0.588	0.00193416			membrane; integral component of membrane
PRICKLE1	5.29465e-08	-0.12501	0.032	0.115	0.0019379	negative regulation of canonical Wnt signaling pathway; aorta development; coronary vasculature development; protein import into nucleus; negative regulation of transcription, DNA-templated; positive regulation of proteasomal ubiquitin-dependent protein catabolic process; Wnt signaling pathway, planar cell polarity pathway; neural tube closure; positive regulation of protein ubiquitination; negat…	zinc ion binding; metal ion binding; protein binding	nucleus; cytoplasm; membrane; cytosol; nuclear membrane
ABCE1	5.35175e-08	-0.191312	0.397	0.571	0.00195879	ribosomal subunit export from nucleus; viral process; translational initiation; translational termination; defense response to virus; regulation of type I interferon-mediated signaling pathway; negative regulation of endoribonuclease activity	nucleotide binding; ATP binding; protein binding; ATPase activity; iron ion binding; ribosomal small subunit binding; endoribonuclease inhibitor activity	cytoplasm; membrane; cytosol; mitochondrion; mitochondrial matrix
AKIRIN2	5.35423e-08	0.264347	0.579	0.509	0.0019597	multicellular organism development; immune system process; innate immune response; negative regulation of transcription by RNA polymerase II; positive regulation of cell population proliferation; embryo development ending in birth or egg hatching; negative regulation of gene expression; positive regulation of endopeptidase activity; response to lipopolysaccharide; positive regulation of interleuk…	protein binding; enzyme binding	nucleus; nucleoplasm; transcriptional repressor complex
CNN3	5.64618e-08	0.257769	0.558	0.485	0.00206656	actomyosin structure organization; cell-cell adhesion; epithelial cell differentiation; negative regulation of ATPase activity	actin binding; calmodulin binding; cadherin binding involved in cell-cell adhesion; microtubule binding; protein binding	cytosol; actin cytoskeleton; focal adhesion; cell-cell adherens junction; postsynaptic density; dendrite; neuronal cell body; dendritic spine
BEX3	6.37475e-08	-0.19955	0.934	0.968	0.00233322	apoptotic process; multicellular organism development; activation of cysteine-type endopeptidase activity involved in apoptotic process; negative regulation of cysteine-type endopeptidase activity involved in apoptotic process; regulation of cysteine-type endopeptidase activity involved in apoptotic process; extrinsic apoptotic signaling pathway via death domain receptors	metal ion binding; protein binding; identical protein binding; cysteine-type endopeptidase activator activity involved in apoptotic process; death receptor binding; nerve growth factor receptor binding	nucleus; cytoplasm; cytosol
NT5C	6.43639e-08	0.183496	0.179	0.102	0.00235578	dephosphorylation; deoxyribonucleotide catabolic process; nucleotide metabolic process; purine nucleotide catabolic process; pyrimidine nucleoside catabolic process; pyrimidine deoxyribonucleotide catabolic process	5'-nucleotidase activity; metal ion binding; nucleotide binding; hydrolase activity; nucleotidase activity; pyrimidine nucleotide binding; phosphatase activity	nucleus; cytoplasm; cytosol; extracellular exosome
CDKN1C	6.54384e-08	0.295509	0.327	0.235	0.00239511	negative regulation of epithelial cell proliferation; positive regulation of transforming growth factor beta receptor signaling pathway; cell cycle; cell cycle arrest; positive regulation of transcription, DNA-templated; regulation of mitotic cell cycle; negative regulation of transcription, DNA-templated; negative regulation of mitotic cell cycle; negative regulation of cyclin-dependent protein …	protein binding; protein kinase inhibitor activity; cyclin-dependent protein serine/threonine kinase inhibitor activity; protein-containing complex binding	cytoplasm; nucleus
PIK3R1	7.01594e-08	-0.318883	0.406	0.543	0.0025679	positive regulation of glucose import; positive regulation of protein localization to plasma membrane; protein transport; negative regulation of apoptotic process; signal transduction; Fc-epsilon receptor signaling pathway; Fc-gamma receptor signaling pathway involved in phagocytosis; leukocyte migration; T cell receptor signaling pathway; cellular glucose homeostasis; negative regulation of cell…	protein binding; transcription factor binding; phosphatidylinositol 3-kinase regulatory subunit binding; insulin receptor substrate binding; protein heterodimerization activity; phosphatidylinositol 3-kinase regulator activity; 1-phosphatidylinositol-3-kinase regulator activity; protein phosphatase binding; phosphotyrosine residue binding; insulin-like growth factor receptor binding; insulin rece…	nucleus; cytoplasm; membrane; plasma membrane; cis-Golgi network; cytosol; cell-cell junction; protein-containing complex; perinuclear endoplasmic reticulum membrane; phosphatidylinositol 3-kinase complex; phosphatidylinositol 3-kinase complex, class IA
BAZ1B	7.10314e-08	0.292413	0.579	0.516	0.00259982	phosphorylation; peptidyl-tyrosine phosphorylation; cellular response to DNA damage stimulus; chromatin remodeling; positive regulation of gene expression, epigenetic; regulation of transcription by RNA polymerase II; histone phosphorylation; chromatin assembly or disassembly	metal ion binding; nucleotide binding; ATP binding; kinase activity; transferase activity; zinc ion binding; protein tyrosine kinase activity; protein binding; non-membrane spanning protein tyrosine kinase activity; histone kinase activity; histone binding	nucleus; nuclear body; nucleoplasm; nuclear replication fork; condensed chromosome; pericentric heterochromatin
GCA	7.25294e-08	-0.25026	0.374	0.522	0.00265465	neutrophil degranulation; membrane fusion	calcium ion binding; metal ion binding; protein homodimerization activity; protein binding; protein heterodimerization activity	cytosol; plasma membrane; cytoplasm; membrane; extracellular region; extracellular exosome; azurophil granule lumen
PIP4P1	7.5372e-08	-0.158614	0.186	0.318	0.00275869	cholesterol metabolic process; phosphatidylinositol dephosphorylation; lysosome localization; phospholipid metabolic process; positive regulation of TORC1 signaling; response to sterol depletion; proton-transporting V-type ATPase complex assembly	hydrolase activity; protein binding; phosphatidylinositol-4,5-bisphosphate 4-phosphatase activity	membrane; integral component of membrane; lysosomal membrane; plasma membrane; cytoplasmic vesicle; lysosome; endosome; late endosome membrane; nucleoplasm; phagocytic vesicle membrane
ACVR2B	7.76921e-08	0.263247	0.543	0.457	0.00284361	BMP signaling pathway; positive regulation of osteoblast differentiation; protein phosphorylation; phosphorylation; transmembrane receptor protein serine/threonine kinase signaling pathway; negative regulation of cold-induced thermogenesis; positive regulation of bone mineralization; cellular response to growth factor stimulus; negative regulation of transcription by RNA polymerase II; activin re…	metal ion binding; nucleotide binding; protein kinase activity; protein serine/threonine kinase activity; ATP binding; kinase activity; transferase activity; protein binding; transmembrane receptor protein serine/threonine kinase activity; activin binding; activin-activated receptor activity; growth factor binding; activin receptor activity, type II; protein serine/threonine/tyrosine kinase activ…	membrane; integral component of membrane; plasma membrane; receptor complex; protein-containing complex; integral component of plasma membrane; cytoplasm; activin receptor complex
FAM3C	7.86522e-08	-0.231649	0.434	0.585	0.00287875	signal transduction; multicellular organism development; negative regulation of gluconeogenesis; platelet degranulation	protein binding; cytokine activity	Golgi apparatus; extracellular region; cytoplasmic vesicle; extracellular exosome; platelet dense granule lumen
PDCD4	8.16038e-08	-0.203202	0.256	0.4	0.00298678	positive regulation of endothelial cell apoptotic process; negative regulation of vascular smooth muscle cell proliferation; positive regulation of inflammatory response; negative regulation of cytokine production involved in inflammatory response; negative regulation of vascular smooth muscle cell differentiation; positive regulation of vascular associated smooth muscle cell apoptotic process; B…	RNA binding; protein binding	nucleus; cytoplasm; cytosol
FAU	8.20764e-08	-0.142013	0.994	0.995	0.00300408	translation; viral transcription; innate immune response in mucosa; antibacterial humoral response; defense response to Gram-positive bacterium; antimicrobial humoral immune response mediated by antimicrobial peptide; translational initiation; nuclear-transcribed mRNA catabolic process, nonsense-mediated decay; SRP-dependent cotranslational protein targeting to membrane	RNA binding; structural constituent of ribosome; protein binding	ribosome; extracellular space; cytosolic small ribosomal subunit; nucleoplasm; cytosol; small ribosomal subunit; intracellular
TMTC1	8.23974e-08	-0.124202	0.043	0.131	0.00301583	RNA processing; protein glycosylation; protein O-linked mannosylation	transferase activity; mannosyltransferase activity; dolichyl-phosphate-mannose-protein mannosyltransferase activity; protein binding	membrane; integral component of membrane; endoplasmic reticulum
PNPLA3	8.28226e-08	-0.126426	0.064	0.162	0.00303139	lipid metabolic process; phospholipid biosynthetic process; lipid catabolic process; triglyceride catabolic process; lipid droplet organization; phosphatidic acid biosynthetic process; lipid homeostasis; triglyceride biosynthetic process; acylglycerol acyl-chain remodeling; long-chain fatty acid metabolic process; glycerophospholipid metabolic process; triglyceride acyl-chain remodeling	transferase activity; hydrolase activity; transferase activity, transferring acyl groups; 1-acylglycerol-3-phosphate O-acyltransferase activity; phospholipase A2 activity; triglyceride lipase activity; long-chain fatty acyl-CoA binding; lysophosphatidic acid binding; lysophosphatidic acid acyltransferase activity; mono-olein transacylation activity; diolein transacylation activity	membrane; integral component of membrane; cytoplasm; endoplasmic reticulum membrane; lipid droplet
RALGPS2	8.65907e-08	-0.170422	0.214	0.358	0.00316931	small GTPase mediated signal transduction; regulation of Ral protein signal transduction	guanyl-nucleotide exchange factor activity	cytoplasm; membrane; plasma membrane; intracellular
MARCH4	8.90886e-08	-0.139022	0.079	0.181	0.00326073	protein ubiquitination	zinc ion binding; metal ion binding; transferase activity; ubiquitin-protein transferase activity	membrane; integral component of membrane; Golgi apparatus; Golgi membrane; Golgi stack; trans-Golgi network
ZNF385D	9.10733e-08	-0.348968	0.047	0.132	0.00333337		nucleic acid binding; zinc ion binding; metal ion binding	nucleus
DSTN	9.54666e-08	-0.158477	0.908	0.945	0.00349417	actin filament severing; actin filament depolymerization; positive regulation of actin filament depolymerization; actin polymerization or depolymerization; actin filament fragmentation	actin binding; protein binding; actin filament binding	actin cytoskeleton; extracellular exosome; cytoplasm; cortical actin cytoskeleton; intracellular
UBE2B	9.77831e-08	0.268345	0.765	0.737	0.00357896	protein ubiquitination; DNA repair; cellular response to DNA damage stimulus; protein autoubiquitination; ubiquitin-dependent protein catabolic process; spermatogenesis; protein K48-linked ubiquitination; protein stabilization; proteasome-mediated ubiquitin-dependent protein catabolic process; positive regulation of canonical Wnt signaling pathway; response to UV; protein polyubiquitination; prot…	nucleotide binding; ATP binding; transferase activity; protein binding; ubiquitin-protein transferase activity; ubiquitin conjugating enzyme activity; ubiquitin protein ligase binding	nucleus; cytoplasm; membrane; plasma membrane; nuclear chromatin; nucleoplasm; chromatin; replication fork; HULC complex; XY body
ZFAS1	9.95603e-08	-0.178603	0.972	0.988	0.00364401
RPL32	1.01062e-07	-0.144065	0.998	0.999	0.00369899	translation; cytoplasmic translation; viral transcription; translational initiation; nuclear-transcribed mRNA catabolic process, nonsense-mediated decay; SRP-dependent cotranslational protein targeting to membrane	RNA binding; structural constituent of ribosome	membrane; ribosome; cytosolic large ribosomal subunit; cytosol; polysomal ribosome; intracellular
MSRA	1.01825e-07	-0.138425	0.056	0.147	0.00372691	oxidation-reduction process; response to oxidative stress; cellular protein modification process; cellular response to oxidative stress; protein repair; methionine metabolic process	oxidoreductase activity; peptide-methionine (S)-S-oxide reductase activity; L-methionine-(S)-S-oxide reductase activity	nucleus; cytoplasm; membrane; cytosol; nucleoplasm; mitochondrion; actin cytoskeleton; extracellular exosome
ALKBH7	1.03034e-07	0.256227	0.66	0.602	0.00377115	oxidation-reduction process; fatty acid metabolic process; cellular response to DNA damage stimulus; regulation of mitochondrial membrane permeability involved in programmed necrotic cell death; programmed cell death; regulation of lipid storage	metal ion binding; oxidoreductase activity; dioxygenase activity	mitochondrion; mitochondrial matrix
C17orf58	1.04464e-07	-0.158352	0.222	0.368	0.0038235		protein binding	extracellular region; collagen-containing extracellular matrix
GNB5	1.05285e-07	-0.170844	0.308	0.464	0.00385354	signal transduction; G protein-coupled receptor signaling pathway; positive regulation of GTPase activity; protein folding; dopamine receptor signaling pathway; negative regulation of voltage-gated calcium channel activity	GTPase activity; GTPase activator activity; protein binding; chaperone binding; G-protein gamma-subunit binding	membrane; cytosol; nucleus; plasma membrane; presynapse; GTPase activator complex
RPL14	1.09433e-07	-0.165402	0.994	0.996	0.00400534	translation; rRNA processing; viral transcription; ribosomal large subunit biogenesis; translational initiation; nuclear-transcribed mRNA catabolic process, nonsense-mediated decay; SRP-dependent cotranslational protein targeting to membrane	RNA binding; structural constituent of ribosome; protein binding; cadherin binding	membrane; ribosome; cytosolic large ribosomal subunit; cytosol; extracellular exosome; postsynaptic density; intracellular
RNF24	1.10947e-07	0.212447	0.65	0.568	0.00406077	protein ubiquitination	zinc ion binding; metal ion binding; protein binding; ubiquitin protein ligase activity	membrane; integral component of membrane; Golgi apparatus; Golgi membrane; endomembrane system
RPL7A	1.12268e-07	-0.148795	1	0.999	0.00410911	translation; ribosome biogenesis; viral transcription; translational initiation; nuclear-transcribed mRNA catabolic process, nonsense-mediated decay; maturation of LSU-rRNA; SRP-dependent cotranslational protein targeting to membrane	RNA binding; protein binding; structural constituent of ribosome; cadherin binding	nucleus; cytoplasm; ribosome; nucleolus; focal adhesion; ribonucleoprotein complex; cytosolic large ribosomal subunit; cytosol; membrane; polysomal ribosome
EIF4EBP1	1.1302e-07	-0.208543	0.438	0.593	0.00413663	negative regulation of translational initiation; regulation of translation; negative regulation of translation; positive regulation of mitotic cell cycle; G1/S transition of mitotic cell cycle; TOR signaling; IRES-dependent translational initiation of linear mRNA; response to ischemia; insulin receptor signaling pathway; lung development; negative regulation of protein complex assembly; response …	eukaryotic initiation factor 4E binding; protein binding; translation repressor activity; translation initiation factor binding; protein phosphatase 2A binding	cytosol; cytoplasm; nucleus; protein-containing complex; glutamatergic synapse; postsynaptic cytosol
SMC3	1.15041e-07	0.240243	0.868	0.871	0.00421061	cell division; chromosome organization; DNA repair; cellular response to DNA damage stimulus; cell cycle; meiotic cell cycle; mitotic cell cycle; sister chromatid cohesion; regulation of mitotic spindle assembly; regulation of DNA replication; stem cell population maintenance	nucleotide binding; ATP binding; protein binding; dynein complex binding; protein heterodimerization activity; beta-tubulin binding; microtubule motor activity; chromatin binding; mediator complex binding	nucleus; nucleoplasm; chromosome; chromosome, centromeric region; cytosol; chromatin; nuclear matrix; mitotic spindle pole; cohesin complex; meiotic cohesin complex; lateral element; nuclear meiotic cohesin complex
PODXL2	1.18618e-07	-0.206513	0.541	0.69	0.00434153	cell adhesion; leukocyte tethering or rolling	protein binding; glycosaminoglycan binding	membrane; integral component of membrane; integral component of plasma membrane; Golgi lumen
YBX1	1.1921e-07	-0.164979	0.994	0.997	0.00436322	mRNA processing; RNA splicing; positive regulation of cell division; positive regulation of transcription by RNA polymerase II; regulation of transcription, DNA-templated; transcription by RNA polymerase II; protein localization to cytoplasmic stress granule; mRNA splicing, via spliceosome; CRD-mediated mRNA stabilization; Notch signaling pathway	nucleic acid binding; RNA binding; DNA binding; protein binding; DNA-binding transcription factor activity, RNA polymerase II-specific; RNA polymerase II proximal promoter sequence-specific DNA binding; DNA-binding transcription activator activity, RNA polymerase II-specific; DNA-binding transcription factor activity; GTPase binding; double-stranded DNA binding; single-stranded DNA binding	nucleus; cytoplasm; intracellular membrane-bounded organelle; cytosol; nuclear membrane; extracellular region; nucleoplasm; extracellular exosome; ribonucleoprotein complex; cytoplasmic stress granule; CRD-mediated mRNA stability complex; histone pre-mRNA 3'end processing complex; U12-type spliceosomal complex
ATP5MC3	1.19323e-07	0.218288	0.925	0.912	0.00436733	proton transmembrane transport; ion transport; ATP synthesis coupled proton transport; ATP biosynthetic process; cristae formation; mitochondrial ATP synthesis coupled proton transport	proton transmembrane transporter activity; lipid binding; proton-transporting ATP synthase activity, rotational mechanism	membrane; integral component of membrane; mitochondrion; mitochondrial membrane; proton-transporting ATP synthase complex, coupling factor F(o); proton-transporting two-sector ATPase complex, proton-transporting domain; mitochondrial outer membrane; mitochondrial proton-transporting ATP synthase complex, coupling factor F(o)
FRRS1L	1.19877e-07	-0.172385	0.132	0.248	0.00438762	regulation of postsynaptic membrane neurotransmitter receptor levels; regulation of glutamate receptor signaling pathway		membrane; integral component of membrane; plasma membrane; cell junction; synapse
DYNC1H1	1.25676e-07	0.221788	0.87	0.856	0.00459986	cell division; cell cycle; microtubule-based movement; mitotic cell cycle; cytoplasmic microtubule organization; G2/M transition of mitotic cell cycle; regulation of G2/M transition of mitotic cell cycle; ciliary basal body-plasma membrane docking; neutrophil degranulation; mitotic spindle organization; antigen processing and presentation of exogenous peptide antigen via MHC class II; endoplasmic…	RNA binding; nucleotide binding; ATP binding; motor activity; microtubule motor activity; protein binding; dynein light intermediate chain binding; dynein intermediate chain binding; ATP-dependent microtubule motor activity, minus-end-directed	cytoplasm; membrane; axon cytoplasm; cytoskeleton; microtubule; centrosome; dynein complex; extracellular region; cytoplasmic dynein complex; cytosol; extracellular exosome; cell cortex; cytoplasmic microtubule; azurophil granule lumen; filopodium
DIRAS2	1.26062e-07	-0.166097	0.056	0.147	0.00461399	signal transduction	nucleotide binding; GTPase activity; GTP binding; GDP binding	membrane; plasma membrane
DUSP5	1.28667e-07	-0.112655	0.026	0.102	0.00470934	protein dephosphorylation; dephosphorylation; MAPK cascade; peptidyl-tyrosine dephosphorylation; peptidyl-threonine dephosphorylation; activation of MAPK activity; inactivation of MAPK activity	hydrolase activity; phosphoprotein phosphatase activity; protein binding; protein tyrosine phosphatase activity; phosphatase activity; protein tyrosine/serine/threonine phosphatase activity; MAP kinase tyrosine/serine/threonine phosphatase activity	nucleus; cytoplasm; nucleoplasm
ATN1	1.3455e-07	-0.1763	0.325	0.485	0.00492468	negative regulation of transcription by RNA polymerase II; central nervous system development; neuron apoptotic process	protein binding; DNA binding; transcription corepressor activity; protein domain specific binding; RNA polymerase II transcription factor binding	nucleus; cytoplasm; nucleoplasm; perinuclear region of cytoplasm; cell junction; nuclear matrix
SLC35C2	1.36282e-07	-0.123323	0.06	0.153	0.00498805	UDP-glucose transmembrane transport; negative regulation of gene expression; fucosylation; protein O-linked fucosylation; positive regulation of Notch signaling pathway	antiporter activity; transmembrane transporter activity	membrane; integral component of membrane; Golgi apparatus; nucleoplasm; endoplasmic reticulum-Golgi intermediate compartment; cis-Golgi network; endoplasmic reticulum-Golgi intermediate compartment membrane
CCND3	1.41091e-07	-0.133176	0.066	0.161	0.00516406	positive regulation of protein phosphorylation; protein phosphorylation; cell division; cell cycle; positive regulation of G1/S transition of mitotic cell cycle; regulation of cyclin-dependent protein serine/threonine kinase activity; mitotic cell cycle phase transition; positive regulation of cyclin-dependent protein serine/threonine kinase activity; negative regulation of transcription by RNA p…	protein binding; protein kinase binding; protein kinase activity; cyclin-dependent protein serine/threonine kinase regulator activity; cyclin-dependent protein serine/threonine kinase activity	nucleus; cytoplasm; membrane; nucleoplasm; cyclin-dependent protein kinase holoenzyme complex
MYH10	1.46192e-07	0.266598	0.645	0.592	0.00535079	cell adhesion; regulation of cell shape; positive regulation of protein secretion; mitotic cytokinesis; actin filament-based movement; actomyosin structure organization; in utero embryonic development; neuron migration; plasma membrane repair; cardiac septum development; exocytosis; substrate-dependent cell migration, cell extension; nuclear migration; axonogenesis; axon guidance; brain developme…	nucleotide binding; ATP binding; motor activity; actin binding; actin filament binding; calmodulin binding; protein binding; ATPase activity; RNA stem-loop binding; mRNA 5'-UTR binding; actin-dependent ATPase activity; microfilament motor activity; ADP binding	nucleus; cytoplasm; myosin complex; cytosol; cell projection; midbody; lamellipodium; extracellular exosome; stress fiber; cell cortex; cleavage furrow; polysome; myosin II complex; actomyosin; myosin II filament; spindle; plasma membrane; brush border; axon; growth cone; neuromuscular junction; neuron projection; neuronal cell body; dendritic spine; glutamatergic synapse
EIF4G2	1.53066e-07	0.190491	0.944	0.953	0.00560235	translational initiation; heart development; positive regulation of translation; positive regulation of axon extension; positive regulation of dendritic spine development; translation; regulation of translation; negative regulation of autophagy; cell cycle arrest; regulation of translational initiation; cell death; positive regulation of cell growth; cellular macromolecule biosynthetic process	RNA binding; translation initiation factor activity; protein binding; mRNA binding; cadherin binding; translation factor activity, RNA binding	cytosol; axon; membrane; eukaryotic translation initiation factor 4F complex; cell-cell adherens junction
SELENOM	1.5431e-07	-0.168829	0.16	0.284	0.00564791	response to selenium ion; multicellular organism growth; corticosterone secretion; hormone metabolic process; adipose tissue development	protein binding	cytoplasm; endoplasmic reticulum; Golgi apparatus; perinuclear region of cytoplasm
CAMK1	1.56811e-07	-0.129049	0.06	0.151	0.00573944	protein phosphorylation; phosphorylation; metabolic process; cell cycle; multicellular organism development; cell differentiation; nervous system development; positive regulation of transcription by RNA polymerase II; positive regulation of peptidyl-serine phosphorylation; positive regulation of protein serine/threonine kinase activity; nucleocytoplasmic transport; signal transduction; positive r…	nucleotide binding; protein kinase activity; protein serine/threonine kinase activity; ATP binding; kinase activity; transferase activity; catalytic activity; calmodulin binding; protein binding; calmodulin-dependent protein kinase activity	nucleus; cytoplasm; cytosol; postsynaptic density; glutamatergic synapse
NTRK3	1.57439e-07	-0.156522	0.165	0.291	0.00576242	positive regulation of gene expression; positive regulation of cell population proliferation; positive regulation of cell migration; positive regulation of protein phosphorylation; activation of protein kinase B activity; protein phosphorylation; phosphorylation; transmembrane receptor protein tyrosine kinase signaling pathway; peptidyl-tyrosine phosphorylation; neurotrophin signaling pathway; mu…	nucleotide binding; protein kinase activity; ATP binding; kinase activity; transferase activity; protein tyrosine kinase activity; transmembrane receptor protein tyrosine kinase activity; protein binding; neurotrophin receptor activity; p53 binding; neurotrophin binding; GPI-linked ephrin receptor activity	membrane; integral component of membrane; integral component of plasma membrane; plasma membrane; receptor complex; axon; cytoplasm; glutamatergic synapse; integral component of postsynaptic membrane
RAB3C	1.58522e-07	-0.134405	0.171	0.3	0.00580205	protein transport; intracellular protein transport; Rab protein signal transduction; protein secretion; protein localization to plasma membrane; regulation of exocytosis; vesicle docking involved in exocytosis; antigen processing and presentation	nucleotide binding; GTPase activity; GTP binding; protein binding; myosin V binding; GTP-dependent protein binding	membrane; plasma membrane; perinuclear region of cytoplasm; endosome; synaptic vesicle; vesicle; cytosol; anchored component of synaptic vesicle membrane
SMARCA2	1.69666e-07	-0.100919	0.282	0.444	0.00620996	positive regulation of transcription by RNA polymerase II; positive regulation of transcription, DNA-templated; regulation of transcription, DNA-templated; nervous system development; ATP-dependent chromatin remodeling; negative regulation of cell population proliferation; negative regulation of transcription by RNA polymerase II; negative regulation of transcription, DNA-templated; regulation of…	nucleotide binding; ATP binding; hydrolase activity; DNA binding; protein binding; ATPase activity; histone binding; helicase activity; transcription coactivator activity; hydrolase activity, acting on acid anhydrides; transcription regulatory region DNA binding; DNA-dependent ATPase activity; chromatin binding	nucleus; intracellular membrane-bounded organelle; nucleoplasm; intermediate filament cytoskeleton; SWI/SNF complex; nuclear chromatin; npBAF complex; nBAF complex
ABR	1.70306e-07	-0.137033	0.126	0.24	0.00623337	intracellular signal transduction; signal transduction; regulation of Rho protein signal transduction; positive regulation of GTPase activity; regulation of small GTPase mediated signal transduction; activation of GTPase activity; G protein-coupled receptor signaling pathway; small GTPase mediated signal transduction; positive regulation of apoptotic process; modulation of chemical synaptic trans…	guanyl-nucleotide exchange factor activity; Rho guanyl-nucleotide exchange factor activity; GTPase activator activity; protein binding; protein serine/threonine kinase activity	membrane; cell projection; cell junction; synapse; axon; cytosol; dendritic spine; Schaffer collateral - CA1 synapse; glutamatergic synapse; postsynaptic density, intracellular component; plasma membrane
LINC00173	1.70887e-07	-0.110759	0.073	0.174	0.00625465
HMGXB4	1.76923e-07	-0.206894	0.513	0.656	0.00647556	Wnt signaling pathway; endosome to lysosome transport; negative regulation of Wnt signaling pathway	DNA binding	nucleus; NURF complex
SEMA3C	1.80064e-07	-0.174722	0.066	0.159	0.00659051	multicellular organism development; cell differentiation; nervous system development; immune response; axon guidance; outflow tract septum morphogenesis; neural crest cell migration; positive regulation of cell migration; negative regulation of axon extension involved in axon guidance; negative chemotaxis; semaphorin-plexin signaling pathway; response to drug; somitogenesis; blood vessel remodeli…	semaphorin receptor binding; chemorepellent activity; protein binding	extracellular region; extracellular space; integral component of plasma membrane; extracellular exosome
TRAP1	1.81118e-07	-0.154335	0.28	0.424	0.00662909	protein folding; negative regulation of intrinsic apoptotic signaling pathway in response to hydrogen peroxide; negative regulation of reactive oxygen species biosynthetic process; translational attenuation; chaperone-mediated protein folding; negative regulation of cellular respiration	ATP binding; unfolded protein binding; RNA binding; nucleotide binding; tumor necrosis factor receptor binding; protein binding; protein kinase binding	membrane; nucleoplasm; mitochondrion; mitochondrial inner membrane; mitochondrial matrix; mitochondrial intermembrane space
AFMID	1.82951e-07	-0.123406	0.094	0.201	0.00669618	tryptophan catabolic process to kynurenine; NAD biosynthetic process; tryptophan catabolic process; 'de novo' NAD biosynthetic process from tryptophan; catabolic process	hydrolase activity; arylformamidase activity	nucleus; cytoplasm; cytosol
SOBP	1.86183e-07	-0.248276	0.226	0.356	0.00681448	sensory perception of sound; locomotory behavior; inner ear morphogenesis; cognition; cochlea development	metal ion binding; SUMO polymer binding	nucleus
SMS	1.87182e-07	0.237386	0.688	0.642	0.00685104	spermine biosynthetic process; polyamine biosynthetic process; polyamine metabolic process; methionine metabolic process; spermine metabolic process	transferase activity; spermine synthase activity	cytosol; extracellular exosome
C15orf61	1.88838e-07	-0.133629	0.132	0.253	0.00691167			extracellular region
SMARCC1	1.93498e-07	0.215014	0.692	0.621	0.00708223	chromatin organization; ATP-dependent chromatin remodeling; positive regulation of transcription, DNA-templated; nervous system development; nucleosome disassembly; chromatin remodeling; regulation of transcription by RNA polymerase II; insulin receptor signaling pathway; animal organ morphogenesis; prostate gland development; negative regulation of proteasomal ubiquitin-dependent protein catabol…	DNA binding; protein binding; histone binding; protein N-terminus binding; transcription coactivator activity; RNA polymerase II distal enhancer sequence-specific DNA binding; RNA polymerase II proximal promoter sequence-specific DNA binding; nucleosomal DNA binding; chromatin binding	nucleus; cytoplasm; nucleoplasm; nuclear chromatin; SWI/SNF complex; protein-containing complex; npBAF complex; nBAF complex; XY body
TLN2	1.94341e-07	-0.140878	0.083	0.182	0.00711306	cell adhesion; cytoskeletal anchoring at plasma membrane; cell-cell junction assembly; endocytosis	actin binding; actin filament binding; protein binding; structural constituent of cytoskeleton; structural molecule activity; clathrin binding	cytoplasm; membrane; plasma membrane; cytoskeleton; cell junction; synapse; focal adhesion; actin cytoskeleton; ruffle
ZNF414	2.03882e-07	-0.119653	0.049	0.135	0.0074623	regulation of transcription by RNA polymerase II	nucleic acid binding; metal ion binding; DNA binding; protein binding; DNA-binding transcription factor activity, RNA polymerase II-specific	nucleus; nuclear chromatin
ARHGAP21	2.04571e-07	-0.251355	0.776	0.865	0.0074875	signal transduction; positive regulation of GTPase activity; regulation of small GTPase mediated signal transduction; Golgi organization; establishment of Golgi localization; organelle transport along microtubule; maintenance of Golgi location	protein binding; GTPase activator activity	cytoplasm; membrane; Golgi apparatus; plasma membrane; cell junction; actin cytoskeleton; cytoskeleton; Golgi membrane; cytoplasmic vesicle; cytoplasmic vesicle membrane; cytosol
CFL1	2.05206e-07	0.152968	0.987	0.99	0.00751075	negative regulation of apoptotic process; actin filament depolymerization; response to virus; cytoskeleton organization; regulation of cell morphogenesis; interleukin-12-mediated signaling pathway; Rho protein signal transduction; actin cytoskeleton organization; positive regulation by host of viral process; mitotic cytokinesis; neural crest cell migration; neural fold formation; protein phosphor…	actin binding; protein binding; actin filament binding; signaling receptor binding	nucleus; cytoplasm; membrane; actin cytoskeleton; extracellular space; plasma membrane; cytoskeleton; cell projection; focal adhesion; cytosol; lamellipodium; extracellular exosome; ruffle membrane; nuclear matrix; vesicle; lamellipodium membrane; cell-cell junction; cortical actin cytoskeleton; intracellular
SULT4A1	2.0761e-07	-0.145266	0.199	0.331	0.00759873	lipid metabolic process; steroid metabolic process; 3'-phosphoadenosine 5'-phosphosulfate metabolic process; sulfur compound metabolic process	transferase activity; protein binding; sulfotransferase activity; identical protein binding	cytoplasm; cytosol
RPL10A	2.09912e-07	-0.167719	0.991	0.991	0.007683	translation; cytoplasmic translation; viral transcription; translational initiation; nuclear-transcribed mRNA catabolic process, nonsense-mediated decay; maturation of LSU-rRNA; SRP-dependent cotranslational protein targeting to membrane; response to ethanol	RNA binding; structural constituent of ribosome; protein binding	nucleus; membrane; ribosome; large ribosomal subunit; focal adhesion; cytosolic large ribosomal subunit; cytosol; extracellular exosome; polysomal ribosome; postsynaptic density
IFI44	2.17603e-07	-0.177266	0.105	0.209	0.00796448	immune response; response to virus; response to bacterium		cytoplasm
DMTN	2.2697e-07	-0.123021	0.113	0.228	0.00830732	actin filament capping; cytoskeleton organization; regulation of actin cytoskeleton organization; transmembrane transport; actin filament bundle assembly; actin cytoskeleton organization; regulation of cell shape; cellular response to cAMP; lamellipodium assembly; negative regulation of focal adhesion assembly; negative regulation of protein targeting to membrane; negative regulation of substrate…	actin binding; protein binding; actin filament binding; signaling receptor binding; spectrin binding; protein self-association	cytoplasm; membrane; cytosol; plasma membrane; cytoskeleton; cell projection; perinuclear region of cytoplasm; cytoplasmic vesicle; endomembrane system; actin cytoskeleton; actin filament; spectrin-associated cytoskeleton; platelet dense tubular network membrane; cell projection membrane; postsynaptic density; cortical cytoskeleton
[truncated: 1,415 more rows]
