# Supplementary material for: FGF8-mediated gene regulation affects regional identity in human cerebral organoids
Source: eLife. 2024 Nov 1;13:e98096. doi: 10.7554/eLife.98096 (PMC11581432; doi:10.7554/eLife.98096)
Supplement: Figure 6—source data 5. — Excel file listing genes with differential expression between WNTi and WNTi + FGF8 organoids in clusters 6 and 7 (GABAergic neurons), visualized as a volcano plot in Figure 6E. [file elife-98096-fig6-data5.xlsx]

## Sheet: S21306_FGF8vsCTL_cls6-7
Gene name	p_val	avg_log2FC	pct.1	pct.2	p_val_adj	GO:biological proces	GO:molecular function	GO:cellular component
NR2F2	1.34754e-266	-2.39147	0.163	0.819	4.93213e-262	negative regulation of endothelial cell proliferation; negative regulation of endothelial cell migration; positive regulation of transcription, DNA-templated; regulation of transcription, DNA-templated; intracellular receptor signaling pathway; steroid hormone mediated signaling pathway; cell differentiation; regulation of transcription by RNA polymerase II; negative regulation of transcription b…	zinc ion binding; metal ion binding; DNA binding; DNA-binding transcription factor activity; protein homodimerization activity; sequence-specific DNA binding; protein binding; steroid hormone receptor activity; RNA polymerase II regulatory region sequence-specific DNA binding; DNA-binding transcription factor activity, RNA polymerase II-specific; transcription corepressor activity; nuclear recept…	nucleus; cytosol; nucleoplasm
NR2F1	2.77393e-245	-2.294	0.156	0.803	1.01529e-240	regulation of transcription, DNA-templated; intracellular receptor signaling pathway; steroid hormone mediated signaling pathway; cell differentiation; regulation of transcription by RNA polymerase II; negative regulation of transcription by RNA polymerase II; positive regulation of transcription by RNA polymerase II; anatomical structure development; signal transduction; transcription initiation…	zinc ion binding; metal ion binding; DNA binding; DNA-binding transcription factor activity; sequence-specific DNA binding; steroid hormone receptor activity; RNA polymerase II regulatory region sequence-specific DNA binding; protein binding; DNA-binding transcription factor activity, RNA polymerase II-specific; RNA polymerase II proximal promoter sequence-specific DNA binding; DNA-binding transc…	nucleus; cytosol; nucleoplasm
NR2F1-AS1	1.12898e-111	-0.726681	0.062	0.419	4.13218e-107
MPPED2	2.50672e-106	1.21308	0.64	0.214	9.17483e-102		metal ion binding; nucleotide binding; hydrolase activity; protein binding; manganese ion binding; AMP binding; phosphoric diester hydrolase activity; GMP binding
CAMK2N1	7.23261e-98	-0.892296	0.769	0.951	2.64721e-93	positive regulation of gene expression; negative regulation of cell population proliferation; negative regulation of cell cycle; negative regulation of protein kinase activity; negative regulation of ERK1 and ERK2 cascade; negative regulation of proteolysis; negative regulation of cyclin-dependent protein kinase activity	protein kinase inhibitor activity; protein kinase binding; calcium-dependent protein kinase inhibitor activity	membrane; plasma membrane; cell junction; synapse; postsynaptic membrane; postsynaptic density; neuron projection; dendrite; neuronal cell body
HIST1H4C	6.28189e-87	-0.996785	0.517	0.805	2.29923e-82	nucleosome assembly; DNA-templated transcription, initiation; cellular protein metabolic process; regulation of gene silencing by miRNA; CENP-A containing nucleosome assembly; regulation of megakaryocyte differentiation; DNA replication-dependent nucleosome assembly; DNA replication-independent nucleosome assembly; chromatin silencing at rDNA; negative regulation of gene expression, epigenetic; p…	RNA binding; DNA binding; protein heterodimerization activity; protein binding; protein domain specific binding	nucleus; membrane; nucleosome; chromosome; extracellular region; nucleoplasm; extracellular exosome; protein-containing complex; nuclear chromosome, telomeric region; nuclear chromosome; nuclear nucleosome
MEIS2	6.97496e-84	1.35473	0.782	0.482	2.5529e-79	regulation of transcription, DNA-templated; multicellular organism development; positive regulation of transcription by RNA polymerase II; transcription by RNA polymerase II; negative regulation of myeloid cell differentiation; negative regulation of transcription by RNA polymerase II; eye development; visual learning; response to mechanical stimulus; pancreas development; positive regulation of …	DNA binding; protein binding; DNA-binding transcription factor activity, RNA polymerase II-specific; RNA polymerase II proximal promoter sequence-specific DNA binding; DNA-binding transcription activator activity, RNA polymerase II-specific; transcription factor binding; transcription corepressor activity; DNA-binding transcription factor activity; transcription coregulator activity; sequence-spe…	nucleus; cytoplasm; perinuclear region of cytoplasm; nuclear chromatin
NR2F2-AS1	1.79054e-78	-0.497619	0.018	0.24	6.55354e-74
EPHA5	2.86404e-76	-0.746575	0.09	0.384	1.04827e-71	protein phosphorylation; phosphorylation; transmembrane receptor protein tyrosine kinase signaling pathway; peptidyl-tyrosine phosphorylation; ephrin receptor signaling pathway; nervous system development; axon guidance; neuron development; regulation of actin cytoskeleton organization; cAMP-mediated signaling; regulation of GTPase activity; positive regulation of CREB transcription factor activi…	nucleotide binding; protein kinase activity; ATP binding; kinase activity; transferase activity; protein tyrosine kinase activity; transmembrane receptor protein tyrosine kinase activity; ephrin receptor activity; transmembrane-ephrin receptor activity; GPI-linked ephrin receptor activity; protein binding	membrane; integral component of membrane; integral component of plasma membrane; plasma membrane; cell projection; perinuclear region of cytoplasm; dendrite; receptor complex; axon; neuron projection; external side of plasma membrane; rough endoplasmic reticulum; neuronal cell body; adherens junction; cell periphery
ZIC1	1.603e-66	0.81937	0.34	0.033	5.86713e-62	multicellular organism development; cell differentiation; positive regulation of transcription, DNA-templated; nervous system development; positive regulation of protein import into nucleus; central nervous system development; brain development; pattern specification process; inner ear morphogenesis; regulation of smoothened signaling pathway; adult walking behavior; spinal cord development; posi…	nucleic acid binding; metal ion binding; DNA binding; DNA-binding transcription factor activity; DNA-binding transcription factor activity, RNA polymerase II-specific; RNA polymerase II regulatory region sequence-specific DNA binding; RNA polymerase II proximal promoter sequence-specific DNA binding; DNA-binding transcription activator activity, RNA polymerase II-specific	nucleus; cytoplasm
TUBB3	1.96886e-66	0.723642	0.991	0.985	7.20623e-62	cytoskeleton organization; microtubule-based process; microtubule cytoskeleton organization; mitotic cell cycle; axon guidance; neuron differentiation; netrin-activated signaling pathway; dorsal root ganglion development	nucleotide binding; GTPase activity; GTP binding; structural constituent of cytoskeleton; protein binding; netrin receptor binding	microtubule; nucleus; cytoplasm; cytoskeleton; cell projection; lamellipodium; filopodium; growth cone; extracellular exosome; dendrite; axon
SCG2	4.17665e-65	-1.32228	0.315	0.618	1.5287e-60	negative regulation of endothelial cell apoptotic process; eosinophil chemotaxis; cellular protein metabolic process; post-translational protein modification; positive chemotaxis; angiogenesis; intracellular signal transduction; protein secretion; negative regulation of extrinsic apoptotic signaling pathway; MAPK cascade; negative regulation of endothelial cell proliferation; positive regulation …	protein binding; chemoattractant activity; cytokine activity	extracellular region; secretory granule; extracellular space; endoplasmic reticulum lumen; dense core granule; neuronal dense core vesicle
CKB	6.32783e-65	0.726353	0.979	0.961	2.31605e-60	phosphorylation; phosphocreatine biosynthetic process; substantia nigra development; creatine metabolic process; brain development; cerebellum development; cellular chloride ion homeostasis	nucleotide binding; ATP binding; kinase activity; transferase activity; catalytic activity; transferase activity, transferring phosphorus-containing groups; protein binding; creatine kinase activity; ubiquitin protein ligase binding	cytoplasm; cytosol; extracellular space; extracellular exosome; nucleus; dendrite; neuronal cell body
LINC01551	8.20947e-64	1.08011	0.73	0.503	3.00475e-59
SPINT2	1.17701e-60	-0.687452	0.378	0.675	4.30798e-56	negative regulation of endopeptidase activity; negative regulation of peptidase activity; neural tube closure; establishment or maintenance of cell polarity; negative regulation of cell-cell adhesion; epithelial cell morphogenesis involved in placental branching; basement membrane organization; cellular response to BMP stimulus; negative regulation of cell motility; negative regulation of neural …	serine-type endopeptidase inhibitor activity; peptidase inhibitor activity; endopeptidase inhibitor activity	membrane; integral component of membrane; extracellular region; cytoplasm; plasma membrane
NTRK2	5.79219e-60	-0.619143	0.133	0.405	2.12e-55	positive regulation of protein phosphorylation; protein phosphorylation; phosphorylation; transmembrane receptor protein tyrosine kinase signaling pathway; peptidyl-tyrosine phosphorylation; multicellular organism development; cell differentiation; nervous system development; positive regulation of gene expression; positive regulation of MAPK cascade; cerebral cortex development; positive regulat…	nucleotide binding; protein kinase activity; ATP binding; kinase activity; transferase activity; protein tyrosine kinase activity; transmembrane receptor protein tyrosine kinase activity; protein homodimerization activity; protein binding; neurotrophin receptor activity; neurotrophin binding; brain-derived neurotrophic factor binding; brain-derived neurotrophic factor-activated receptor activity	cytoplasm; membrane; integral component of membrane; integral component of plasma membrane; plasma membrane; cell projection; perinuclear region of cytoplasm; cell junction; synapse; postsynaptic membrane; dendrite; endosome; early endosome; receptor complex; axon; early endosome membrane; endosome membrane; postsynaptic density; Golgi membrane; axon terminus; dendritic spine; cytosol; terminal b…
NRN1	3.48161e-58	-0.776684	0.063	0.293	1.27431e-53	nervous system development; neuron projection extension; regulation of synaptic vesicle exocytosis	protein homodimerization activity; protein heterodimerization activity	membrane; plasma membrane; cell junction; synapse; extracellular region; anchored component of membrane; extracellular space; AMPA glutamate receptor complex; anchored component of plasma membrane; glutamatergic synapse
ETV1	3.84794e-58	0.9817	0.318	0.04	1.40838e-53	regulation of transcription, DNA-templated; transcription by RNA polymerase II; cell differentiation; regulation of transcription by RNA polymerase II; positive regulation of transcription by RNA polymerase II; peripheral nervous system neuron development; axon guidance; muscle organ development; mechanosensory behavior; positive regulation of transcription, DNA-templated	DNA binding; DNA-binding transcription factor activity; sequence-specific DNA binding; protein binding; DNA-binding transcription factor activity, RNA polymerase II-specific; RNA polymerase II proximal promoter sequence-specific DNA binding; DNA-binding transcription activator activity, RNA polymerase II-specific	nucleus; nuclear chromatin
ZIC2	2.94002e-55	0.686832	0.415	0.113	1.07608e-50	multicellular organism development; cell differentiation; positive regulation of transcription, DNA-templated; regulation of transcription by RNA polymerase II; nervous system development; visual perception; central nervous system development; negative regulation of transcription, DNA-templated; brain development; positive regulation of DNA-binding transcription factor activity	nucleic acid binding; metal ion binding; DNA binding; DNA-binding transcription factor activity; chromatin DNA binding; DNA-binding transcription factor activity, RNA polymerase II-specific; RNA polymerase II regulatory region sequence-specific DNA binding	nucleus; cytoplasm; nuclear body
CSAD	7.23094e-55	-0.564034	0.183	0.46	2.6466e-50	carboxylic acid metabolic process; taurine biosynthetic process; L-cysteine catabolic process to hypotaurine; L-cysteine catabolic process to taurine	catalytic activity; lyase activity; carboxy-lyase activity; pyridoxal phosphate binding; aspartate 1-decarboxylase activity; sulfinoalanine decarboxylase activity	cytoplasm
NRXN1	1.08441e-54	-0.672367	0.673	0.878	3.96904e-50	cell adhesion; positive regulation of synapse assembly; neurotransmitter secretion; axon guidance; chemical synaptic transmission; learning; synapse assembly; positive regulation of synaptic transmission, glutamatergic; social behavior; neuromuscular process controlling balance; neuron cell-cell adhesion; adult behavior; vocalization behavior; postsynaptic membrane assembly; gephyrin clustering i…	metal ion binding; protein binding; signaling receptor activity; calcium ion binding; cell adhesion molecule binding; calcium channel regulator activity; neuroligin family protein binding; acetylcholine receptor binding; signaling receptor binding; transmembrane signaling receptor activity; calcium-dependent protein binding; type 1 fibroblast growth factor receptor binding	membrane; integral component of membrane; nucleolus; plasma membrane; cell junction; synapse; cell surface; integral component of plasma membrane; endoplasmic reticulum; presynaptic membrane; vesicle; nuclear membrane; neuronal cell body; protein-containing complex; Schaffer collateral - CA1 synapse; glutamatergic synapse; GABA-ergic synapse; integral component of presynaptic membrane; integral c…
PBX3	4.15217e-53	1.13485	0.709	0.441	1.51974e-48	regulation of transcription, DNA-templated; anterior compartment pattern formation; posterior compartment specification; regulation of respiratory gaseous exchange by nervous system process; respiratory gaseous exchange by respiratory system; adult locomotory behavior; dorsal spinal cord development; positive regulation of transcription by RNA polymerase II; neuron development	DNA binding; DNA-binding transcription factor activity; sequence-specific DNA binding; DNA-binding transcription factor activity, RNA polymerase II-specific; RNA polymerase II distal enhancer sequence-specific DNA binding; DNA-binding transcription activator activity, RNA polymerase II-specific; protein binding	nucleus; nuclear chromatin; transcription factor complex
VAMP2	3.63392e-52	-0.511037	0.947	0.979	1.33005e-47	vesicle-mediated transport; post-Golgi vesicle-mediated transport; membrane organization; glutamate secretion; neurotransmitter secretion; regulation of exocytosis; eosinophil degranulation; synaptic vesicle exocytosis; exocytosis; response to glucose; protein transport; calcium-ion regulated exocytosis; cellular response to insulin stimulus; Golgi to plasma membrane protein transport; long-term …	protein binding; syntaxin binding; calmodulin binding; protein self-association; SNARE binding; syntaxin-1 binding; phospholipid binding; calcium-dependent protein binding	membrane; integral component of membrane; plasma membrane; cell junction; cytoplasmic vesicle; synapse; clathrin-coated vesicle; cytosol; integral component of plasma membrane; SNARE complex; neuron projection; secretory granule membrane; vesicle; synaptic vesicle membrane; perinuclear region of cytoplasm; clathrin-coated vesicle membrane; trans-Golgi network; voltage-gated potassium channel comp…
CADM2	4.66459e-50	-0.746689	0.257	0.529	1.70729e-45	cell adhesion; adherens junction organization		membrane; integral component of membrane; plasma membrane; cell projection; cell junction; synapse; axon
IGFBPL1	2.04966e-47	0.811844	0.616	0.364	7.50196e-43	regulation of cell growth; cellular response to tumor cell	insulin-like growth factor binding; protein binding	extracellular region; extracellular space
GPM6A	3.60511e-46	-0.575643	0.808	0.929	1.31951e-41	calcium ion transmembrane transport; nervous system development; neuron projection morphogenesis; stem cell differentiation; neuron projection development; positive regulation of filopodium assembly; neuron migration; synapse assembly; neural retina development; response to bacterium; regulation of synapse organization	protein binding; calcium channel activity	membrane; integral component of membrane; plasma membrane; cell projection; axon; filopodium; axonal growth cone; extracellular exosome; neuronal cell body; dendritic spine; neuron projection; extracellular vesicle; glutamatergic synapse; integral component of presynaptic active zone membrane
CADM1	2.22668e-44	-0.533014	0.541	0.786	8.14989e-40	cell adhesion; apoptotic process; multicellular organism development; cell differentiation; immune system process; spermatogenesis; viral process; homophilic cell adhesion via plasma membrane adhesion molecules; cell recognition; positive regulation of natural killer cell mediated cytotoxicity; adherens junction organization; heterophilic cell-cell adhesion via plasma membrane cell adhesion molec…	protein homodimerization activity; protein binding; signaling receptor binding; PDZ domain binding	membrane; integral component of membrane; plasma membrane; cell junction; synapse; basolateral plasma membrane; cell-cell junction
OLFM1	2.5628e-44	-0.539768	0.477	0.732	9.38009e-40	nervous system development; multicellular organism development; positive regulation of apoptotic process; positive regulation of gene expression; cardiac epithelial to mesenchymal transition; negative regulation of gene expression; regulation of axon extension; neuronal signal transduction; atrioventricular valve formation; positive regulation of epithelial to mesenchymal transition	protein binding	endoplasmic reticulum; cell; extracellular space; cell projection; extracellular region; cell junction; synapse; axon; perikaryon; axonal growth cone; neuronal cell body
FGF12	2.3887e-43	-0.455352	0.065	0.256	8.74289e-39	fibroblast growth factor receptor signaling pathway; nervous system development; regulation of sodium ion transmembrane transporter activity; signal transduction; cell-cell signaling; cardiac muscle cell action potential involved in contraction; heart development; regulation of sodium ion transmembrane transport; regulation of neuronal action potential; regulation of voltage-gated sodium channel …	growth factor activity; protein binding; sodium channel regulator activity; ion channel binding	nucleus; extracellular space
ARL4C	3.13175e-42	-0.539718	0.436	0.687	1.14625e-37	intracellular protein transport; vesicle-mediated transport; endocytic recycling	nucleotide binding; GTP binding; protein binding; alpha-tubulin binding; GTPase activity	cytoplasm; membrane; cytosol; plasma membrane; cell projection; filopodium; nucleus
SMARCA2	9.73444e-42	-0.411381	0.124	0.346	3.5629e-37	positive regulation of transcription by RNA polymerase II; positive regulation of transcription, DNA-templated; regulation of transcription, DNA-templated; nervous system development; ATP-dependent chromatin remodeling; negative regulation of cell population proliferation; negative regulation of transcription by RNA polymerase II; negative regulation of transcription, DNA-templated; regulation of…	nucleotide binding; ATP binding; hydrolase activity; DNA binding; protein binding; ATPase activity; histone binding; helicase activity; transcription coactivator activity; hydrolase activity, acting on acid anhydrides; transcription regulatory region DNA binding; DNA-dependent ATPase activity; chromatin binding	nucleus; intracellular membrane-bounded organelle; nucleoplasm; intermediate filament cytoskeleton; SWI/SNF complex; nuclear chromatin; npBAF complex; nBAF complex
PAX6	1.28052e-41	0.962189	0.657	0.445	4.68685e-37	positive regulation of gene expression; positive regulation of transcription by RNA polymerase II; positive regulation of transcription, DNA-templated; regulation of transcription, DNA-templated; multicellular organism development; cell differentiation; negative regulation of transcription by RNA polymerase II; visual perception; central nervous system development; animal organ morphogenesis; tra…	DNA binding; sequence-specific DNA binding; protein binding; DNA-binding transcription factor activity, RNA polymerase II-specific; R-SMAD binding; DNA-binding transcription factor activity; protein kinase binding; RNA polymerase II proximal promoter sequence-specific DNA binding; transcription factor binding; histone acetyltransferase binding; RNA polymerase II core promoter sequence-specific DN…	nucleus; cytoplasm; cytosol; nucleoplasm; nuclear chromatin; membrane; integral component of membrane
LMO3	2.13656e-41	-0.955146	0.213	0.445	7.82003e-37	negative regulation of ERK1 and ERK2 cascade; positive regulation of fat cell differentiation; positive regulation of peroxisome proliferator activated receptor signaling pathway; positive regulation of glucocorticoid receptor signaling pathway	metal ion binding; protein binding	cytoplasm
RTN1	5.80727e-41	-0.493515	0.842	0.96	2.12552e-36		protein binding	membrane; integral component of membrane; endoplasmic reticulum; endoplasmic reticulum membrane; Golgi apparatus; Golgi membrane; integral component of endoplasmic reticulum membrane
LY6H	4.70097e-40	-0.557226	0.491	0.73	1.7206e-35	acetylcholine receptor signaling pathway; negative regulation of signaling receptor activity; nervous system development; animal organ morphogenesis	protein binding; acetylcholine receptor binding; acetylcholine receptor inhibitor activity	membrane; plasma membrane; extracellular region; anchored component of membrane
ETFB	2.09203e-39	-0.534766	0.7	0.86	7.65703e-35	oxidation-reduction process; fatty acid beta-oxidation using acyl-CoA dehydrogenase; respiratory electron transport chain; electron transport chain	protein binding; electron transfer activity	mitochondrion; mitochondrial matrix
MAPT	6.51491e-39	-0.508056	0.731	0.894	2.38452e-34	negative regulation of gene expression; signal transduction; microtubule cytoskeleton organization; positive regulation of axon extension; neuron projection development; intracellular distribution of mitochondria; generation of neurons; protein polymerization; regulation of synaptic plasticity; activation of cysteine-type endopeptidase activity involved in apoptotic process; regulation of microtu…	protein homodimerization activity; protein binding; microtubule binding; tubulin binding; identical protein binding; SH3 domain binding; enzyme binding; chaperone binding; actin binding; apolipoprotein binding; protein kinase binding; lipoprotein particle binding; DNA binding; AT DNA binding; double-stranded DNA binding; single-stranded DNA binding; RNA binding; protein binding, bridging; dynacti…	cytoplasm; plasma membrane; nucleus; nuclear speck; membrane; axon cytoplasm; cytosol; cytoskeleton; cell projection; microtubule; dendrite; axon; neuron projection; growth cone; cell body; cytoplasmic ribonucleoprotein granule; membrane raft; cell; neuronal cell body; extracellular region; glial cell projection; mitochondrion; microtubule cytoskeleton; axolemma; nuclear periphery; somatodendriti…
NSG2	3.10467e-38	-0.465049	0.656	0.872	1.13634e-33	clathrin coat assembly; dopamine receptor signaling pathway; endosomal transport	clathrin light chain binding	membrane; integral component of membrane; Golgi apparatus; cell projection; cytoplasmic vesicle; cytoplasmic vesicle membrane; lysosome; dendrite; endosome; early endosome; late endosome membrane; Golgi cisterna membrane; early endosome membrane; endosome membrane; late endosome; multivesicular body membrane; lysosomal lumen; trans-Golgi network membrane; Golgi cis cisterna membrane
KCNMB2	8.3481e-38	-0.356259	0.02	0.149	3.05549e-33	potassium ion transport; potassium ion transmembrane transport; ion transport; regulation of vasoconstriction; neuronal action potential; detection of calcium ion; action potential	calcium-activated potassium channel activity; potassium channel regulator activity; ion channel inhibitor activity	membrane; integral component of membrane; plasma membrane; voltage-gated potassium channel complex; integral component of plasma membrane
FIGN	1.15293e-37	-0.76058	0.183	0.4	4.21982e-33	cell division; cell cycle; cytoplasmic microtubule organization; regulation of double-strand break repair via homologous recombination; microtubule severing	nucleotide binding; ATP binding; ATPase activity; microtubule-severing ATPase activity; protein C-terminus binding	nucleus; cytoplasm; cytoskeleton; microtubule; microtubule organizing center; nuclear matrix
NXPH1	2.21043e-37	0.601792	0.213	0.023	8.0904e-33		signaling receptor binding	extracellular region
PCLO	5.08031e-37	-0.616112	0.564	0.749	1.85944e-32	cytoskeleton organization; synapse assembly; maintenance of presynaptic active zone structure; synaptic vesicle exocytosis; regulation of exocytosis; cAMP-mediated signaling; insulin secretion; protein localization to synapse; synaptic vesicle clustering; presynapse to nucleus signaling pathway	metal ion binding; calcium-dependent phospholipid binding; calcium ion binding; profilin binding; structural constituent of presynaptic active zone; protein binding	cytoskeleton; cell junction; synapse; presynaptic active zone; extracellular exosome; cytoskeleton of presynaptic active zone; postsynaptic density; presynaptic active zone cytoplasmic component; membrane; integral component of membrane
MYT1L	1.04245e-36	-0.518816	0.373	0.624	3.81548e-32	regulation of transcription, DNA-templated; multicellular organism development; cell differentiation; positive regulation of transcription by RNA polymerase II; nervous system development; negative regulation of transcription by RNA polymerase II; neuron development; regulation of transcription by RNA polymerase II; neuron fate specification; neuron differentiation; neuron fate commitment	zinc ion binding; DNA-binding transcription factor activity; transcription regulator activity; metal ion binding; DNA binding; RNA polymerase II regulatory region sequence-specific DNA binding; DNA-binding transcription activator activity, RNA polymerase II-specific; DNA-binding transcription factor activity, RNA polymerase II-specific; DNA-binding transcription repressor activity, RNA polymerase…	nucleus; chromosome; nuclear chromatin
NEUROD6	1.18813e-36	-0.60744	0.045	0.201	4.34869e-32	nervous system development; regulation of transcription, DNA-templated; multicellular organism development; cell differentiation; dentate gyrus development; positive regulation of transcription by RNA polymerase II	protein dimerization activity; DNA binding; RNA polymerase II proximal promoter sequence-specific DNA binding; DNA-binding transcription activator activity, RNA polymerase II-specific; DNA-binding transcription factor activity, RNA polymerase II-specific	nucleus; nuclear chromatin
FEZF1	1.22718e-35	-0.953576	0.035	0.172	4.49162e-31	multicellular organism development; cell differentiation; nervous system development; negative regulation of transcription by RNA polymerase II; neuron migration; axon guidance; negative regulation of cell population proliferation; telencephalon development; olfactory bulb development; forebrain anterior/posterior pattern specification; forebrain development; cell dedifferentiation; positive regu…	nucleic acid binding; metal ion binding; DNA binding; RNA polymerase II proximal promoter sequence-specific DNA binding; DNA-binding transcription repressor activity, RNA polymerase II-specific; sequence-specific DNA binding; transcription regulatory region DNA binding	nucleus; cytosol
SYT13	1.45153e-35	-0.376452	0.162	0.378	5.31275e-31	vesicle-mediated transport; regulation of dopamine secretion; calcium-ion regulated exocytosis; regulation of calcium ion-dependent exocytosis; cellular response to calcium ion	calcium ion binding; calcium-dependent phospholipid binding; SNARE binding; clathrin binding; phosphatidylserine binding	membrane; integral component of membrane; intracellular membrane-bounded organelle; plasma membrane; neuron projection; axon; exocytic vesicle; transport vesicle; integral component of plasma membrane
RPS6	2.22176e-35	0.477518	0.988	0.986	8.13187e-31	translation; rRNA processing; ribosomal small subunit biogenesis; G1/S transition of mitotic cell cycle; mitotic cell cycle; placenta development; T cell proliferation involved in immune response; activation-induced cell death of T cells; mitotic cell cycle checkpoint; gastrulation; mammalian oogenesis stage; T cell differentiation in thymus; glucose homeostasis; negative regulation of apoptotic …	RNA binding; structural constituent of ribosome; protein binding; protein kinase binding	nucleus; membrane; endoplasmic reticulum; cytosol; ribosome; cytosolic small ribosomal subunit; nucleolus; nucleoplasm; cytoplasm; polysome; dendrite; perinuclear region of cytoplasm; cytoplasmic ribonucleoprotein granule; ribonucleoprotein complex; cell body; small ribosomal subunit; intracellular
ATP5F1E	2.36923e-35	0.366575	0.983	0.98	8.67162e-31	ion transport; ATP synthesis coupled proton transport; ATP biosynthetic process; cristae formation; mitochondrial ATP synthesis coupled proton transport	hydrolase activity; protein binding; proton-transporting ATP synthase activity, rotational mechanism; ATPase activity; transmembrane transporter activity	membrane; mitochondrial inner membrane; mitochondrion; mitochondrial matrix; proton-transporting ATP synthase complex, catalytic core F(1); mitochondrial proton-transporting ATP synthase complex; mitochondrial proton-transporting ATP synthase complex, catalytic core F(1)
PLS3	4.54508e-34	-0.576287	0.046	0.19	1.66354e-29	actin filament bundle assembly; bone development; actin filament network formation	metal ion binding; calcium ion binding; actin binding; actin filament binding; protein binding	cytosol; plasma membrane; cytoplasm; actin filament; actin filament bundle
PLK2	7.3742e-34	-0.566538	0.278	0.507	2.69903e-29	protein phosphorylation; phosphorylation; negative regulation of apoptotic process; mitotic cell cycle; mitotic cell cycle checkpoint; Ras protein signal transduction; memory; negative regulation of angiogenesis; positive regulation of protein binding; positive regulation of proteasomal ubiquitin-dependent protein catabolic process; Rap protein signal transduction; regulation of synaptic plastici…	nucleotide binding; protein kinase activity; protein serine/threonine kinase activity; ATP binding; kinase activity; transferase activity; protein-containing complex binding; protein binding; ATP-dependent protein binding	cytoplasm; chromatin; dendrite; cytoskeleton; cell projection; centrosome; nucleus; cytosol; centriole; spindle pole
HIGD2A	1.15147e-33	0.492954	0.591	0.376	4.21449e-29	oxidation-reduction process; negative regulation of apoptotic process		membrane; integral component of membrane; mitochondrial inner membrane; mitochondrion; respirasome; mitochondrial membrane
PDZRN3	1.51785e-33	-0.436215	0.057	0.209	5.55548e-29	protein ubiquitination; neuromuscular junction development	protein binding; zinc ion binding; metal ion binding; transferase activity; ubiquitin-protein transferase activity; ubiquitin protein ligase activity	nucleus; cytosol; cytoplasm; nucleoplasm; cell junction; synapse; neuromuscular junction
MIF	1.70171e-33	-0.420112	0.976	0.994	6.22842e-29	negative regulation of cell migration; negative regulation of gene expression; positive regulation of ERK1 and ERK2 cascade; positive regulation of fibroblast proliferation; negative regulation of apoptotic process; inflammatory response; immune system process; innate immune response; leukocyte migration; positive chemotaxis; cell population proliferation; neutrophil degranulation; positive regul…	isomerase activity; protein binding; cytokine activity; identical protein binding; protease binding; phenylpyruvate tautomerase activity; signaling receptor binding; chemoattractant activity; dopachrome isomerase activity; cytokine receptor binding	extracellular space; cytoplasm; plasma membrane; cytosol; nucleoplasm; extracellular region; extracellular exosome; cell surface; secretory granule lumen; ficolin-1-rich granule lumen; vesicle
SLF1	2.41868e-33	-0.466975	0.192	0.4	8.85262e-29	DNA repair; cellular response to DNA damage stimulus; positive regulation of double-strand break repair; positive regulation of protein complex assembly; positive regulation of maintenance of mitotic sister chromatid cohesion; protein localization to site of double-strand break	protein binding; ubiquitin protein ligase binding; protein-containing complex binding	nucleus; cytoplasm; nucleosome; cytoskeleton; centrosome; microtubule organizing center; site of double-strand break; nuclear inclusion body
H3F3A	2.75334e-33	0.301973	1	1	1.00775e-28	nucleosome assembly; cellular protein metabolic process; regulation of gene silencing by miRNA; positive regulation of cell growth; regulation of megakaryocyte differentiation; DNA replication-independent nucleosome assembly; blood coagulation; chromatin silencing at rDNA; negative regulation of gene expression, epigenetic; telomere organization; osteoblast differentiation; nucleus organization; …	DNA binding; protein heterodimerization activity; protein binding; RNA polymerase II distal enhancer sequence-specific DNA binding; RNA polymerase II core promoter sequence-specific DNA binding; nucleosomal DNA binding	nucleus; nucleosome; chromosome; extracellular region; nucleoplasm; extracellular exosome; protein-containing complex; nuclear chromosome, telomeric region; nuclear chromosome; nuclear nucleosome; Barr body
ZIC3	3.77852e-33	0.32267	0.183	0.014	1.38297e-28	multicellular organism development; cell differentiation; positive regulation of transcription, DNA-templated; nervous system development; positive regulation of transcription by RNA polymerase II; central nervous system development; heart looping; determination of left/right symmetry; somatic stem cell population maintenance; pattern specification process; anterior/posterior pattern specificatio…	nucleic acid binding; metal ion binding; DNA binding; DNA-binding transcription factor activity; sequence-specific DNA binding; DNA-binding transcription factor activity, RNA polymerase II-specific; RNA polymerase II regulatory region sequence-specific DNA binding; protein binding; RNA polymerase II proximal promoter sequence-specific DNA binding; DNA-binding transcription activator activity, RNA…	nucleus; cytoplasm; nucleoplasm
INA	6.88228e-33	-0.418732	0.811	0.912	2.51898e-28	nervous system development; multicellular organism development; cell differentiation; substantia nigra development; postsynaptic intermediate filament cytoskeleton organization; postsynaptic actin cytoskeleton organization; intermediate filament cytoskeleton organization; neurofilament cytoskeleton organization; cellular response to leukemia inhibitory factor	structural constituent of cytoskeleton; structural constituent of postsynaptic actin cytoskeleton; structural constituent of postsynaptic intermediate filament cytoskeleton	nucleoplasm; nuclear membrane; extracellular space; intermediate filament cytoskeleton; intermediate filament; neurofilament; cytoplasmic ribonucleoprotein granule; Schaffer collateral - CA1 synapse; postsynapse
NTM	1.07806e-32	-0.595037	0.432	0.65	3.94581e-28	cell adhesion; neuron recognition	protein binding	membrane; plasma membrane; extracellular region; anchored component of membrane
SYT4	1.53542e-32	-0.506759	0.215	0.436	5.61979e-28	exocytosis; cell differentiation; vesicle-mediated transport; regulation of dopamine secretion; calcium-ion regulated exocytosis; regulation of calcium ion-dependent exocytosis; cellular response to calcium ion; positive regulation of dendrite extension; neurotransmitter secretion; brain development; memory; positive regulation of glutamate secretion; regulation of endocytosis; regulation of vesi…	metal ion binding; protein binding; calcium ion binding; calcium-dependent phospholipid binding; SNARE binding; clathrin binding; phosphatidylserine binding; syntaxin-1 binding; syntaxin binding; syntaxin-3 binding; protein homodimerization activity; protein heterodimerization activity	membrane; integral component of membrane; intracellular membrane-bounded organelle; plasma membrane; cell junction; cytoplasmic vesicle; synapse; neuron projection; axon; synaptic vesicle membrane; exocytic vesicle; Golgi apparatus; synaptic vesicle; integral component of Golgi membrane; integral component of synaptic vesicle membrane; dendrite; secretory granule membrane; dense core granule; ves…
VIM	2.084e-32	1.05307	0.727	0.604	7.62765e-28	positive regulation of translation; cellular response to lipopolysaccharide; viral process; cytokine-mediated signaling pathway; muscle filament sliding; cellular response to muramyl dipeptide; positive regulation of gene expression; negative regulation of neuron projection development; astrocyte development; positive regulation of collagen biosynthetic process; regulation of mRNA stability; inte…	protein binding; identical protein binding; structural constituent of cytoskeleton; protein domain specific binding; scaffold protein binding; double-stranded RNA binding; structural constituent of eye lens; keratin filament binding	cytoplasm; nucleus; cytosol; cytoskeleton; intermediate filament; focal adhesion; peroxisome; extracellular exosome; ribonucleoprotein complex; nuclear matrix; polysome; plasma membrane; cell leading edge; cell projection; neuron projection; phagocytic vesicle
RBFOX3	3.35534e-32	-0.329473	0.127	0.317	1.22809e-27	mRNA processing; RNA splicing; regulation of RNA splicing; regulation of alternative mRNA splicing, via spliceosome; nervous system development	nucleic acid binding; RNA binding; mRNA binding; DNA binding	nucleus; cytoplasm; neuronal cell body; perikaryon
ROBO2	7.51948e-32	0.580246	0.581	0.358	2.7522e-27	ventricular septum morphogenesis; multicellular organism development; cell differentiation; chemotaxis; nervous system development; axon guidance; aorta development; brain development; homophilic cell adhesion via plasma membrane adhesion molecules; outflow tract septum morphogenesis; metanephros development; aortic valve morphogenesis; pulmonary valve morphogenesis; negative regulation of synaps…	protein binding; identical protein binding; axon guidance receptor activity	membrane; integral component of membrane; cell surface; plasma membrane; extracellular exosome; axolemma
NDST3	7.61236e-32	-0.349354	0.059	0.209	2.7862e-27	metabolic process; heparan sulfate proteoglycan biosynthetic process; heparin biosynthetic process; heparan sulfate proteoglycan biosynthetic process, polysaccharide chain biosynthetic process	transferase activity; hydrolase activity; catalytic activity; sulfotransferase activity; deacetylase activity; [heparan sulfate]-glucosamine N-sulfotransferase activity; heparan sulfate N-acetylglucosaminyltransferase activity	membrane; integral component of membrane; Golgi apparatus; Golgi membrane
TIAM2	1.21725e-31	0.662907	0.385	0.176	4.45527e-27	intracellular signal transduction; signal transduction; regulation of Rho protein signal transduction; positive regulation of GTPase activity; regulation of small GTPase mediated signal transduction; G protein-coupled receptor signaling pathway; positive regulation of apoptotic process; regulation of lipid metabolic process	guanyl-nucleotide exchange factor activity; Rho guanyl-nucleotide exchange factor activity; GTPase activator activity; protein binding	cytoplasm; cell projection; cytosol; lamellipodium; filopodium; growth cone; extracellular exosome; membrane
GJD2	2.62153e-31	-0.244107	0.032	0.161	9.59506e-27	cell communication; action potential; cell-cell signaling; chemical synaptic transmission; visual perception		membrane; integral component of membrane; plasma membrane; gap junction; cell junction; connexin complex
SARAF	7.03002e-31	-0.388402	0.904	0.922	2.57306e-26	ion transport; calcium ion transport; regulation of store-operated calcium entry	protein binding	membrane; integral component of membrane; endoplasmic reticulum; endoplasmic reticulum membrane; integral component of endoplasmic reticulum membrane; endoplasmic reticulum-plasma membrane contact site
ZBTB38	1.62827e-30	-0.431305	0.287	0.511	5.95965e-26	cellular response to DNA damage stimulus; regulation of transcription, DNA-templated; positive regulation of transcription by RNA polymerase II; negative regulation of transcription, DNA-templated; regulation of DNA replication	protein binding; nucleic acid binding; metal ion binding; DNA binding; DNA-binding transcription factor activity; protein homodimerization activity; DNA-binding transcription factor activity, RNA polymerase II-specific; methyl-CpG binding	nucleoplasm; nucleus; chromosome; blood microparticle
DACT1	4.16573e-30	-0.292349	0.103	0.277	1.5247e-25	multicellular organism development; Wnt signaling pathway; positive regulation of Wnt signaling pathway; nervous system development; negative regulation of transcription by RNA polymerase II; negative regulation of canonical Wnt signaling pathway; negative regulation of Wnt signaling pathway; regulation of protein stability; positive regulation of canonical Wnt signaling pathway; negative regulat…	protein binding; beta-catenin binding; delta-catenin binding; protein kinase C binding; protein kinase A binding; histone deacetylase binding; RNA polymerase II transcription factor binding	nucleoplasm; nucleus; cytoplasm; cell junction; synapse; cytosol; beta-catenin destruction complex
SCG3	4.92685e-30	-0.397467	0.784	0.905	1.80328e-25	cellular protein metabolic process; post-translational protein modification; platelet degranulation; protein localization to secretory granule	RNA binding	membrane; extracellular region; cytoplasmic vesicle; secretory granule lumen; endoplasmic reticulum lumen; transport vesicle; transport vesicle membrane; secretory granule membrane
MAB21L1	1.51871e-28	-0.546415	0.033	0.152	5.55862e-24	multicellular organism development; positive regulation of cell population proliferation; camera-type eye development; anatomical structure morphogenesis	metal ion binding; nucleotide binding; ATP binding; transferase activity; GTP binding; protein binding; nucleotidyltransferase activity	nucleus
NKAIN4	8.35708e-28	0.567402	0.417	0.22	3.05877e-23	regulation of sodium ion transport		membrane; integral component of membrane; plasma membrane
TMEM35A	3.98912e-27	-0.433122	0.504	0.683	1.46006e-22			membrane; integral component of membrane; cytoplasmic vesicle; peroxisome; peroxisomal membrane
MT-ATP6	5.46503e-27	0.517344	0.968	0.971	2.00026e-22	ion transport; ATP synthesis coupled proton transport; ATP biosynthetic process; cristae formation; mitochondrial ATP synthesis coupled proton transport; aging; response to hyperoxia	proton transmembrane transporter activity; protein binding; ATPase activity; proton-transporting ATP synthase activity, rotational mechanism; transmembrane transporter activity	membrane; integral component of membrane; mitochondrial inner membrane; mitochondrion; proton-transporting ATP synthase complex, coupling factor F(o); mitochondrial proton-transporting ATP synthase complex; proton-transporting ATP synthase complex
PDE1A	1.66733e-26	-0.332963	0.073	0.218	6.10258e-22	signal transduction; G protein-coupled receptor signaling pathway; regulation of smooth muscle cell apoptotic process; cGMP catabolic process; regulation of smooth muscle cell proliferation	metal ion binding; hydrolase activity; phosphoric diester hydrolase activity; 3',5'-cyclic-nucleotide phosphodiesterase activity; calmodulin binding; calmodulin-dependent cyclic-nucleotide phosphodiesterase activity; calcium- and calmodulin-regulated 3',5'-cyclic-GMP phosphodiesterase activity	cytosol; neuronal cell body; nucleus; cytoplasm
MEST	1.98785e-26	0.700181	0.68	0.547	7.27572e-22	mesoderm development; regulation of lipid storage	hydrolase activity; catalytic activity	membrane; integral component of membrane; endoplasmic reticulum; endoplasmic reticulum membrane; extracellular exosome
CREG2	2.00386e-26	-0.36284	0.125	0.297	7.33434e-22		cofactor binding	extracellular region; extracellular space; endoplasmic reticulum; Golgi apparatus
NES	2.05751e-26	0.545371	0.332	0.14	7.53071e-22	multicellular organism development; nervous system development; positive regulation of neural precursor cell proliferation; brain development; negative regulation of protein binding; negative regulation of catalytic activity; central nervous system development; G2/M transition of mitotic cell cycle; stem cell proliferation; embryonic camera-type eye development; positive regulation of intermediat…	protein binding; intermediate filament binding	intermediate filament cytoskeleton; intermediate filament; cytoplasm
THRA	2.96582e-26	-0.397909	0.523	0.71	1.08552e-21	regulation of transcription, DNA-templated; intracellular receptor signaling pathway; steroid hormone mediated signaling pathway; animal organ morphogenesis; cell differentiation; positive regulation of transcription by RNA polymerase II; negative regulation of transcription by RNA polymerase II; transcription by RNA polymerase II; hormone-mediated signaling pathway; multicellular organism develo…	zinc ion binding; DNA-binding transcription factor activity; sequence-specific DNA binding; metal ion binding; DNA binding; nuclear receptor activity; transcription regulatory region DNA binding; protein binding; steroid hormone receptor activity; DNA-binding transcription factor activity, RNA polymerase II-specific; RNA polymerase II regulatory region sequence-specific DNA binding; transcription…	nucleus; cytoplasm; cytosol; nuclear chromatin; nucleoplasm; RNA polymerase II transcription factor complex
SEZ6L2	5.8885e-26	-0.363266	0.714	0.866	2.15525e-21	adult locomotory behavior; cerebellar Purkinje cell layer development; synapse maturation; regulation of protein kinase C signaling		membrane; integral component of membrane; endoplasmic reticulum; endoplasmic reticulum membrane; plasma membrane; neuronal cell body
GNG2	6.73137e-26	-0.400985	0.528	0.696	2.46375e-21	G protein-coupled receptor signaling pathway; signal transduction; protein folding; platelet activation; cellular response to prostaglandin E stimulus; cellular response to catecholamine stimulus; Wnt signaling pathway, calcium modulating pathway; adenylate cyclase-activating dopamine receptor signaling pathway; cell population proliferation	GTPase activity; protein binding; G-protein beta-subunit binding	membrane; plasma membrane; heterotrimeric G-protein complex; G-protein beta/gamma-subunit complex; extracellular exosome
TAGLN3	8.69547e-26	0.408997	0.921	0.875	3.18263e-21	central nervous system development; negative regulation of transcription by RNA polymerase II	protein binding; actin filament binding	nucleus
SNAP25	1.18452e-25	-0.397084	0.412	0.628	4.33545e-21	potassium ion transmembrane transport; exocytosis; chemical synaptic transmission; neutrophil degranulation; vesicle fusion; synaptic vesicle priming; synaptic vesicle fusion to presynaptic active zone membrane; regulation of insulin secretion; glutamate secretion; neurotransmitter secretion; synaptic vesicle docking; synaptic vesicle exocytosis; neurotransmitter uptake; locomotory behavior; asso…	voltage-gated potassium channel activity; protein binding; SNARE binding; syntaxin-1 binding; SNAP receptor activity; syntaxin binding; calcium-dependent protein binding	cytoplasm; membrane; plasma membrane; perinuclear region of cytoplasm; cell junction; synapse; cytosol; specific granule membrane; tertiary granule membrane; SNARE complex; neuron projection; vesicle; cytoskeleton; voltage-gated potassium channel complex; BLOC-1 complex; trans-Golgi network; synaptic vesicle; axon; growth cone; extrinsic component of cytoplasmic side of plasma membrane; somatoden…
ROBO1	2.36748e-25	0.491048	0.44	0.235	8.66521e-21	positive regulation of gene expression; negative regulation of gene expression; ventricular septum morphogenesis; axon guidance; multicellular organism development; cell differentiation; chemotaxis; axon midline choice point recognition; Roundabout signaling pathway; nervous system development; cell adhesion; aorta development; homophilic cell adhesion via plasma membrane adhesion molecules; acti…	protein binding; axon guidance receptor activity; identical protein binding; LRR domain binding	cytoplasm; membrane; integral component of membrane; plasma membrane; cell projection; cell surface; axon; integral component of plasma membrane; endoplasmic reticulum-Golgi intermediate compartment membrane
SLC17A6	4.35805e-25	-0.351244	0.088	0.239	1.59509e-20	transmembrane transport; ion transport; sodium ion transport; L-glutamate transmembrane transport; synaptic transmission, glutamatergic; neurotransmitter transport; regulation of synapse structure or activity; neurotransmitter loading into synaptic vesicle	symporter activity; L-glutamate transmembrane transporter activity; neurotransmitter transmembrane transporter activity	membrane; integral component of membrane; integral component of plasma membrane; cell junction; cytoplasmic vesicle; synapse; neuron projection; synaptic vesicle membrane; integral component of synaptic vesicle membrane; excitatory synapse
PJA2	5.20836e-25	-0.38238	0.731	0.848	1.90631e-20	protein ubiquitination; hippo signaling; inflammatory response; innate immune response; regulation of protein kinase A signaling; long-term memory; positive regulation of JNK cascade; positive regulation of toll-like receptor 2 signaling pathway; regulation of macrophage activation; positive regulation of p38MAPK cascade	metal ion binding; transferase activity; ubiquitin-protein transferase activity; protein binding; ubiquitin protein ligase activity; protein kinase A catalytic subunit binding; protein kinase A regulatory subunit binding	cytoplasm; membrane; endoplasmic reticulum; endoplasmic reticulum membrane; Golgi apparatus; intermediate filament cytoskeleton; plasma membrane; Golgi membrane; cell junction; synapse; postsynaptic membrane; postsynaptic density
PROX1	7.3729e-25	-0.344253	0.031	0.136	2.69856e-20	regulation of transcription, DNA-templated; positive regulation of cell population proliferation; negative regulation of cell population proliferation; positive regulation of endothelial cell migration; negative regulation of DNA-binding transcription factor activity; positive regulation of sarcomere organization; ventricular septum morphogenesis; positive regulation of transcription, DNA-templat…	transcription regulatory region DNA binding; DNA binding; protein binding; DNA-binding transcription factor activity, RNA polymerase II-specific; DNA-binding transcription factor activity; RNA polymerase II proximal promoter sequence-specific DNA binding; nuclear receptor binding; DNA-binding transcription repressor activity, RNA polymerase II-specific; sequence-specific DNA binding; DBD domain b…	cytoplasm; nucleus; nuclear chromatin
GABRG2	1.1897e-24	-0.377688	0.102	0.253	4.35442e-20	ion transport; chloride transport; gamma-aminobutyric acid signaling pathway; ion transmembrane transport; signal transduction; chemical synaptic transmission; regulation of membrane potential; nervous system process; chloride transmembrane transport; inhibitory synapse assembly; synaptic transmission, GABAergic; regulation of postsynaptic membrane potential; cellular response to histamine; post-…	ion channel activity; transmembrane signaling receptor activity; GABA-A receptor activity; extracellular ligand-gated ion channel activity; protein binding; chloride channel activity; transmitter-gated ion channel activity involved in regulation of postsynaptic membrane potential; benzodiazepine receptor activity; GABA-gated chloride ion channel activity; inhibitory extracellular ligand-gated ion…	membrane; integral component of membrane; plasma membrane; cell projection; cell junction; cytoplasmic vesicle; synapse; postsynaptic membrane; cytoplasmic vesicle membrane; chloride channel complex; dendrite; integral component of plasma membrane; neuron projection; postsynapse; dendrite membrane; GABA-A receptor complex; axon; GABA-ergic synapse
DNER	2.38061e-24	-0.38573	0.422	0.627	8.71326e-20	Notch signaling pathway; endocytosis; neuron migration; synapse assembly; central nervous system development; Notch receptor processing; glial cell differentiation; skeletal muscle fiber development	calcium ion binding; Notch binding; protein binding; transmembrane signaling receptor activity; clathrin binding	membrane; integral component of membrane; plasma membrane; dendrite; early endosome; neuronal cell body
MT3	2.85764e-24	-0.275096	0.061	0.189	1.04593e-19	negative regulation of apoptotic process; energy reserve metabolic process; cholesterol catabolic process; zinc ion transport; cellular metal ion homeostasis; cellular zinc ion homeostasis; response to oxidative stress; brain development; negative regulation of autophagy; positive regulation of gene expression; positive regulation of cell death; astrocyte development; regulation of response to fo…	metal ion binding; zinc ion binding; protein binding; copper ion binding; drug binding; cysteine-type endopeptidase inhibitor activity involved in apoptotic process; protein kinase activator activity; antioxidant activity; cadmium ion binding	cytoplasm; perinuclear region of cytoplasm; extracellular space; mitochondrial outer membrane; rough endoplasmic reticulum; ribosome; microtubule; plasma membrane; synaptic vesicle; postsynaptic density; axon; dendritic spine; astrocyte projection; astrocyte end-foot; nucleus; cytosol; inclusion body
RPS9	4.96742e-24	0.291888	0.991	0.989	1.81813e-19	translation; viral transcription; positive regulation of cell population proliferation; translational initiation; rRNA processing; nuclear-transcribed mRNA catabolic process, nonsense-mediated decay; SRP-dependent cotranslational protein targeting to membrane; positive regulation of translational fidelity	RNA binding; structural constituent of ribosome; protein binding; rRNA binding; translation regulator activity	nucleus; cytoplasm; membrane; ribosome; small ribosomal subunit; cytosolic small ribosomal subunit; nucleolus; focal adhesion; nucleoplasm; cytosol; extracellular exosome; ribonucleoprotein complex; intracellular; synapse
GSTO1	5.14556e-24	0.344487	0.329	0.145	1.88333e-19	regulation of release of sequestered calcium ion into cytosol by sarcoplasmic reticulum; regulation of cardiac muscle contraction by regulation of the release of sequestered calcium ion; oxidation-reduction process; cellular oxidant detoxification; interleukin-12-mediated signaling pathway; cellular response to arsenic-containing substance; glutathione derivative biosynthetic process; negative re…	transferase activity; oxidoreductase activity; protein binding; glutathione transferase activity; glutathione dehydrogenase (ascorbate) activity; methylarsonate reductase activity	cytoplasm; cytosol; extracellular exosome
NEGR1	8.05874e-24	-0.475277	0.191	0.36	2.94958e-19	cell adhesion; locomotory behavior; feeding behavior; positive regulation of neuron projection development; cell-cell adhesion	protein binding	membrane; plasma membrane; extracellular region; anchored component of membrane
ENC1	9.24336e-24	-0.489601	0.297	0.489	3.38316e-19	nervous system development; protein ubiquitination; multicellular organism development; proteasomal ubiquitin-independent protein catabolic process; negative regulation of translation; positive regulation of neuron projection development	actin binding; protein binding	nucleus; cytoplasm; cytoskeleton; nuclear matrix; Cul3-RING ubiquitin ligase complex; nuclear chromatin; nucleoplasm; nucleolus; neuronal cell body
PCSK1N	1.49434e-23	-0.461618	0.821	0.897	5.46942e-19	neuropeptide signaling pathway; negative regulation of endopeptidase activity; response to dietary excess; response to cold; peptide hormone processing	endopeptidase inhibitor activity; signaling receptor binding; serine-type endopeptidase inhibitor activity	Golgi apparatus; extracellular region; extracellular space; trans-Golgi network; secretory granule
PCDH9	1.59032e-23	-0.521496	0.321	0.512	5.82073e-19	cell adhesion; homophilic cell adhesion via plasma membrane adhesion molecules	calcium ion binding	membrane; integral component of membrane; plasma membrane; integral component of plasma membrane; growth cone; cell-cell contact zone
GNAI2	1.63705e-23	0.431579	0.773	0.668	5.99176e-19	positive regulation of cell population proliferation; G protein-coupled receptor signaling pathway; signal transduction; cell division; cell cycle; adenylate cyclase-modulating G protein-coupled receptor signaling pathway; protein folding; adenylate cyclase-inhibiting G protein-coupled receptor signaling pathway; response to nutrient; negative regulation of adenylate cyclase activity; gamma-amino…	metal ion binding; nucleotide binding; GTPase activity; GTP binding; protein binding; guanyl nucleotide binding; G-protein beta/gamma-subunit complex binding; G protein-coupled receptor binding	cytoplasm; membrane; cytosol; nucleoplasm; plasma membrane; cytoskeleton; heterotrimeric G-protein complex; centrosome; microtubule organizing center; midbody; extracellular exosome; extracellular vesicle; nucleus; dendrite; cell body; membrane raft
BEX5	2.02201e-23	-0.394034	0.279	0.464	7.40077e-19		protein binding	cytoplasm
DKK3	3.01591e-23	-0.325962	0.272	0.464	1.10385e-18	negative regulation of canonical Wnt signaling pathway; multicellular organism development; Wnt signaling pathway; negative regulation of Wnt signaling pathway; negative regulation of signaling receptor activity; negative regulation of transcription, DNA-templated; anatomical structure morphogenesis; adrenal gland development; negative regulation of aldosterone biosynthetic process; negative regu…	co-receptor binding; receptor antagonist activity	extracellular region; extracellular space
IDS	7.15177e-23	-0.374682	0.54	0.699	2.61762e-18	glycosaminoglycan catabolic process; chondroitin sulfate catabolic process	metal ion binding; hydrolase activity; catalytic activity; sulfuric ester hydrolase activity; iduronate-2-sulfatase activity	lysosome; lysosomal lumen
DAPL1	1.47914e-22	0.41319	0.14	0.018	5.4138e-18	apoptotic process; cell differentiation; negative regulation of autophagy; cellular response to amino acid starvation; apoptotic signaling pathway; G protein-coupled receptor signaling pathway; signal transduction; detection of chemical stimulus involved in sensory perception of smell	death domain binding; olfactory receptor activity	membrane; integral component of membrane
GNG5	1.70076e-22	0.636172	0.404	0.224	6.22495e-18	G protein-coupled receptor signaling pathway; signal transduction	GTPase activity; protein binding; G-protein beta-subunit binding; PDZ domain binding	membrane; plasma membrane; heterotrimeric G-protein complex; G-protein beta/gamma-subunit complex; extracellular exosome
GNAO1	1.85566e-22	-0.382661	0.482	0.667	6.79192e-18	G protein-coupled receptor signaling pathway; signal transduction; adenylate cyclase-modulating G protein-coupled receptor signaling pathway; protein folding; muscle contraction; Wnt signaling pathway, calcium modulating pathway; dopamine receptor signaling pathway; aging; locomotory behavior; regulation of heart contraction; cellular process; response to organonitrogen compound; response to orga…	metal ion binding; nucleotide binding; GTPase activity; GTP binding; guanyl nucleotide binding; G-protein beta/gamma-subunit complex binding; G protein-coupled receptor binding; G protein-coupled serotonin receptor binding; mu-type opioid receptor binding; corticotropin-releasing hormone receptor 1 binding; signaling receptor binding; GTPase activating protein binding; protein-containing complex …	membrane; plasma membrane; heterotrimeric G-protein complex; dendrite; protein-containing complex; neuron projection; myelin sheath; cell body
FRRS1L	1.87653e-22	-0.310863	0.149	0.313	6.86829e-18	regulation of postsynaptic membrane neurotransmitter receptor levels; regulation of glutamate receptor signaling pathway		membrane; integral component of membrane; plasma membrane; cell junction; synapse
BCL11A	1.9612e-22	0.568154	0.686	0.541	7.1782e-18	regulation of transcription, DNA-templated; negative regulation of transcription by RNA polymerase II; protein sumoylation; positive regulation of gene expression; negative regulation of dendrite extension; negative regulation of neuron remodeling; cellular response to L-glutamate; negative regulation of dendrite development; negative regulation of branching morphogenesis of a nerve	nucleic acid binding; metal ion binding; DNA-binding transcription factor activity; sequence-specific DNA binding; RNA polymerase II proximal promoter sequence-specific DNA binding; DNA-binding transcription repressor activity, RNA polymerase II-specific; protein kinase binding	nucleus; cytoplasm; nucleoplasm; postsynaptic density
ANK3	2.21907e-22	-0.360013	0.724	0.854	8.12204e-18	positive regulation of gene expression; signal transduction; endoplasmic reticulum to Golgi vesicle-mediated transport; neuromuscular junction development; protein localization to plasma membrane; positive regulation of homotypic cell-cell adhesion; establishment of protein localization; cytoskeletal anchoring at plasma membrane; neuronal action potential; cellular response to magnesium ion; posi…	protein binding; ion channel binding; cadherin binding; protein binding, bridging; cytoskeletal protein binding; structural constituent of cytoskeleton; spectrin binding	cytoplasm; membrane; Golgi apparatus; plasma membrane; cytoskeleton; cell projection; cell junction; synapse; postsynaptic membrane; lysosome; axon; cytosol; sarcolemma; basolateral plasma membrane; cell surface; endoplasmic reticulum; T-tubule; lateral plasma membrane; sarcoplasmic reticulum; Z disc; node of Ranvier; axon initial segment; dendrite; intercalated disc; spectrin-associated cytoskel…
TSPAN2	2.33925e-22	-0.1831	0.046	0.158	8.5619e-18	inflammatory response; brain development; astrocyte development; microglia development; myelination; oligodendrocyte differentiation; axon development	protein binding	membrane; integral component of membrane; integral component of plasma membrane; plasma membrane; myelin sheath
ENO1	3.32193e-22	-0.405994	0.724	0.847	1.21586e-17	glycolytic process; negative regulation of transcription by RNA polymerase II; response to virus; negative regulation of cell growth; negative regulation of transcription, DNA-templated; gluconeogenesis; canonical glycolysis; positive regulation of plasminogen activation; positive regulation of muscle contraction; negative regulation of hypoxia-induced intrinsic apoptotic signaling pathway; posit…	RNA binding; metal ion binding; magnesium ion binding; lyase activity; DNA binding; protein binding; phosphopyruvate hydratase activity; DNA-binding transcription repressor activity, RNA polymerase II-specific; cadherin binding; RNA polymerase II regulatory region sequence-specific DNA binding; protein homodimerization activity; GTPase binding	cytoplasm; nucleus; membrane; cytosol; plasma membrane; extracellular space; phosphopyruvate hydratase complex; extracellular exosome; M band; cell surface; cell cortex region
CXADR	3.51522e-22	-0.359479	0.79	0.885	1.28661e-17	cell adhesion; viral entry into host cell; regulation of immune response; leukocyte migration; neutrophil chemotaxis; mitochondrion organization; heart development; viral process; actin cytoskeleton reorganization; heterophilic cell-cell adhesion via plasma membrane cell adhesion molecules; cardiac muscle fiber development; regulation of AV node cell action potential; cell-cell junction organizat…	protein binding; integrin binding; beta-catenin binding; PDZ domain binding; virus receptor activity; cell adhesion molecule binding; connexin binding; cell adhesive protein binding involved in AV node cell-bundle of His cell communication	membrane; integral component of membrane; nucleoplasm; plasma membrane; cell junction; extracellular region; membrane raft; integral component of plasma membrane; bicellular tight junction; filopodium; growth cone; acrosomal vesicle; basolateral plasma membrane; protein-containing complex; adherens junction; cell-cell adherens junction; neuron projection; cell-cell junction; apicolateral plasma m…
AC107398.3	3.92882e-22	-0.161669	0.027	0.12	1.43799e-17
TNIK	4.76825e-22	-0.28993	0.197	0.372	1.74523e-17	protein phosphorylation; phosphorylation; Wnt signaling pathway; nervous system development; positive regulation of protein phosphorylation; cytoskeleton organization; neuron projection morphogenesis; protein autophosphorylation; signal transduction by protein phosphorylation; activation of protein kinase activity; intracellular signal transduction; microvillus assembly; protein localization to p…	nucleotide binding; protein kinase activity; protein serine/threonine kinase activity; ATP binding; kinase activity; transferase activity; protein binding	nucleus; cytoplasm; cytosol; nucleoplasm; cytoskeleton; endosome; extracellular exosome; recycling endosome; apical plasma membrane; presynapse; glutamatergic synapse; postsynaptic density, intracellular component
RAB3B	5.14996e-22	-0.382203	0.232	0.405	1.88494e-17	protein transport; intracellular protein transport; Rab protein signal transduction; protein secretion; protein localization to plasma membrane; regulation of exocytosis; vesicle docking involved in exocytosis; antigen processing and presentation; peptidyl-cysteine methylation; positive regulation of dopamine uptake involved in synaptic transmission; regulation of vesicle size; regulation of syna…	nucleotide binding; GTPase activity; GTP binding; protein binding; GDP binding; myosin V binding; GTP-dependent protein binding	cytoplasm; membrane; Golgi apparatus; plasma membrane; perinuclear region of cytoplasm; extracellular exosome; endosome; synaptic vesicle; vesicle; dopaminergic synapse; cytosol; secretory granule; anchored component of synaptic vesicle membrane
ST6GAL2	8.24519e-22	-0.407128	0.174	0.341	3.01782e-17	protein glycosylation; sialylation; carbohydrate metabolic process; oligosaccharide metabolic process	transferase activity; catalytic activity; sialyltransferase activity; transferase activity, transferring glycosyl groups; beta-galactoside alpha-2,6-sialyltransferase activity	membrane; integral component of membrane; Golgi apparatus; Golgi cisterna membrane; Golgi membrane
RPL5	1.07399e-21	0.269188	0.998	1	3.93092e-17	translation; rRNA processing; ribosomal large subunit assembly; viral transcription; ribosomal large subunit biogenesis; translational initiation; nuclear-transcribed mRNA catabolic process, nonsense-mediated decay; SRP-dependent cotranslational protein targeting to membrane; positive regulation of gene expression; protein stabilization; regulation of signal transduction by p53 class mediator; po…	structural constituent of ribosome; 5S rRNA binding; RNA binding; protein binding; rRNA binding; mRNA 3'-UTR binding; mRNA 5'-UTR binding; ubiquitin protein ligase binding; ubiquitin ligase inhibitor activity	ribosome; intracellular; nucleus; cytoplasm; membrane; endoplasmic reticulum; nucleolus; cytosol; nucleoplasm; focal adhesion; cytosolic large ribosomal subunit; extracellular exosome; protein-containing complex; ribonucleoprotein complex
SPATS2L	1.25539e-21	-0.462018	0.155	0.304	4.59487e-17		RNA binding; protein binding	nucleus; cytoplasm; nucleolus; cytosol; protein-containing complex
MT-ND3	1.27142e-21	0.438192	0.944	0.939	4.65351e-17	oxidation-reduction process; mitochondrial electron transport, NADH to ubiquinone; mitochondrial respiratory chain complex I assembly; response to oxidative stress; response to light intensity; response to hormone; cellular response to glucocorticoid stimulus	protein binding; NADH dehydrogenase (ubiquinone) activity	membrane; integral component of membrane; mitochondrion; respirasome; mitochondrial membrane; mitochondrial respiratory chain complex I; mitochondrial inner membrane
TSPAN18	1.38801e-21	-0.23732	0.103	0.244	5.08025e-17			membrane; integral component of membrane; integral component of plasma membrane
RPL3	2.52502e-21	0.266096	0.998	1	9.24183e-17	translation; ribosomal large subunit assembly; viral transcription; translational initiation; nuclear-transcribed mRNA catabolic process, nonsense-mediated decay; SRP-dependent cotranslational protein targeting to membrane; cellular response to interleukin-4	structural constituent of ribosome; RNA binding; protein binding; 5S rRNA binding	nucleolus; cytosol; ribosome; intracellular; nucleus; cytoplasm; focal adhesion; cytosolic large ribosomal subunit; extracellular exosome; protein-containing complex; synapse
NCAM1	2.75024e-21	-0.32889	0.789	0.892	1.00662e-16	cell adhesion; viral entry into host cell; MAPK cascade; viral process; axon guidance; interferon-gamma-mediated signaling pathway; commissural neuron axon guidance; regulation of semaphorin-plexin signaling pathway	protein binding; virus receptor activity	membrane; integral component of membrane; cytosol; plasma membrane; extracellular region; anchored component of membrane; collagen-containing extracellular matrix; cell surface; Golgi membrane; external side of plasma membrane
RPS4X	2.8244e-21	0.269039	0.99	0.998	1.03376e-16	translation; multicellular organism development; positive regulation of translation; viral transcription; positive regulation of cell population proliferation; translational initiation; nuclear-transcribed mRNA catabolic process, nonsense-mediated decay; SRP-dependent cotranslational protein targeting to membrane	RNA binding; structural constituent of ribosome; rRNA binding; protein binding	cytoplasm; membrane; ribosome; cytosolic small ribosomal subunit; focal adhesion; nucleoplasm; cytosol; extracellular exosome; synapse; ribonucleoprotein complex; cytoplasmic ribonucleoprotein granule; polysome; small ribosomal subunit; intracellular
SH3BP5	2.83182e-21	-0.337107	0.499	0.685	1.03647e-16	intracellular signal transduction; negative regulation of protein kinase activity; signal transduction; negative regulation of protein tyrosine kinase activity	protein binding; guanyl-nucleotide exchange factor activity; Rab guanyl-nucleotide exchange factor activity; SH3 domain binding; protein kinase inhibitor activity	membrane; nucleoplasm; mitochondrion; nuclear body; cytoplasmic vesicle; cytoplasmic vesicle membrane; cytoplasm
CHGB	3.61951e-21	-0.364954	0.365	0.543	1.32478e-16	signal transduction; cellular protein metabolic process; post-translational protein modification	protein binding; hormone activity	extracellular region; secretory granule; extracellular space; endoplasmic reticulum lumen
RPS20	4.21561e-21	0.348407	0.987	0.99	1.54295e-16	translation; viral transcription; translational initiation; nuclear-transcribed mRNA catabolic process, nonsense-mediated decay; SRP-dependent cotranslational protein targeting to membrane	RNA binding; structural constituent of ribosome; protein binding	cytoplasm; membrane; ribosome; small ribosomal subunit; cytosolic small ribosomal subunit; nucleoplasm; cytosol; extracellular exosome; intracellular
PDE5A	4.30679e-21	0.38027	0.171	0.04	1.57633e-16	signal transduction; metabolic process; cGMP catabolic process; positive regulation of cardiac muscle hypertrophy; regulation of nitric oxide mediated signal transduction; negative regulation of T cell proliferation; positive regulation of MAP kinase activity; cGMP metabolic process; negative regulation of cardiac muscle contraction; relaxation of cardiac muscle; positive regulation of oocyte dev…	metal ion binding; nucleotide binding; hydrolase activity; protein binding; catalytic activity; phosphoric diester hydrolase activity; 3',5'-cyclic-nucleotide phosphodiesterase activity; cGMP binding; 3',5'-cyclic-GMP phosphodiesterase activity; cyclic-nucleotide phosphodiesterase activity	cytosol
MSRB2	5.71352e-21	0.394395	0.465	0.296	2.09121e-16	oxidation-reduction process; response to oxidative stress; protein repair; actin filament polymerization	metal ion binding; oxidoreductase activity; actin binding; peptide-methionine (R)-S-oxide reductase activity; oxidoreductase activity, acting on a sulfur group of donors, disulfide as acceptor; zinc ion binding; L-methionine-(R)-S-oxide reductase activity	mitochondrion; cytosol
PLP1	6.88851e-21	-0.179583	0.022	0.107	2.52126e-16	substantia nigra development; neuron projection development; chemical synaptic transmission; axon development; axon ensheathment; myelination; glial cell differentiation; central nervous system myelination; inflammatory response; integrin-mediated signaling pathway; positive regulation of gene expression; astrocyte development; long-chain fatty acid biosynthetic process	protein binding; structural molecule activity; structural constituent of myelin sheath	membrane; integral component of membrane; plasma membrane; myelin sheath
OPCML	7.14548e-21	-0.218193	0.06	0.177	2.61532e-16	cell adhesion; neuron recognition	protein binding	membrane; plasma membrane; extracellular region; anchored component of membrane
CHST2	7.75962e-21	-0.232642	0.079	0.206	2.8401e-16	carbohydrate metabolic process; inflammatory response; multicellular organism development; keratan sulfate biosynthetic process; N-acetylglucosamine metabolic process; sulfur compound metabolic process	transferase activity; sulfotransferase activity; N-acetylglucosamine 6-O-sulfotransferase activity	membrane; integral component of membrane; Golgi apparatus; Golgi membrane; trans-Golgi network; intrinsic component of Golgi membrane
LINC01322	8.29909e-21	-0.200005	0.026	0.115	3.03755e-16
CXCR4	1.05819e-20	-0.588047	0.125	0.264	3.87306e-16	G protein-coupled receptor signaling pathway; signal transduction; chemotaxis; immune response; cell chemotaxis; response to hypoxia; regulation of cell adhesion; viral process; inflammatory response; axon guidance; positive regulation of cytosolic calcium ion concentration; calcium-mediated signaling; dendritic cell chemotaxis; response to virus; positive regulation of cold-induced thermogenesis…	G protein-coupled receptor activity; actin binding; protein binding; chemokine receptor activity; cytokine binding; identical protein binding; ubiquitin protein ligase binding; ubiquitin binding; C-C chemokine receptor activity; chemokine binding; C-C chemokine binding; coreceptor activity; virus receptor activity; C-X-C chemokine receptor activity; drug binding; myosin light chain binding; C-X-C…	plasma membrane; membrane; integral component of membrane; cell junction; cytoplasmic vesicle; cell surface; lysosome; external side of plasma membrane; endosome; early endosome; cell leading edge; extracellular exosome; late endosome; cytoplasm; protein-containing complex; nucleus
SNX10	1.15765e-20	-0.298921	0.249	0.429	4.23711e-16	protein transport; cilium assembly; protein localization to cilium; cell projection organization; osteoclast differentiation; endosome organization; protein localization to centrosome; gastric acid secretion; endocytosis; bone mineralization; tooth eruption; bone resorption; calcium ion homeostasis; ruffle assembly; cellular response to leukemia inhibitory factor	phosphatidylinositol binding; protein binding; lipid binding; ATPase binding; 1-phosphatidylinositol binding	nucleus; cytoplasm; membrane; endoplasmic reticulum; cytoskeleton; centrosome; microtubule organizing center; endosome; extrinsic component of endosome membrane; endosome membrane; secretory granule; apical cytoplasm
CACNA1A	1.47013e-20	-0.244045	0.146	0.303	5.38081e-16	cellular response to amyloid-beta; response to amyloid-beta; transmembrane transport; ion transport; regulation of ion transmembrane transport; calcium ion transport; calcium ion transmembrane transport; chemical synaptic transmission; membrane depolarization; positive regulation of cytosolic calcium ion concentration; cell death; regulation of insulin secretion; modulation of chemical synaptic t…	metal ion binding; ion channel activity; voltage-gated ion channel activity; protein binding; voltage-gated calcium channel activity; calcium channel activity; syntaxin binding; amyloid-beta binding; high voltage-gated calcium channel activity; voltage-gated calcium channel activity involved in regulation of presynaptic cytosolic calcium levels	neuronal cell body; nucleus; cytoplasm; membrane; integral component of membrane; plasma membrane; cell projection; voltage-gated calcium channel complex; presynapse; dendrite; glutamatergic synapse
PANTR1	1.50184e-20	0.590281	0.5	0.326	5.49687e-16
LHX2	1.51494e-20	-0.268841	0.154	0.316	5.54481e-16	regulation of transcription, DNA-templated; positive regulation of transcription, DNA-templated; neuron differentiation; positive regulation of transcription by RNA polymerase II; neural tube closure; hair follicle development; nervous system development; axon guidance; brain development; mesoderm development; dorsal/ventral pattern formation; telencephalon development; olfactory bulb development…	metal ion binding; DNA binding; sequence-specific DNA binding; DNA-binding transcription factor activity, RNA polymerase II-specific; RNA polymerase II regulatory region sequence-specific DNA binding; RNA polymerase II proximal promoter sequence-specific DNA binding; DNA-binding transcription activator activity, RNA polymerase II-specific; chromatin binding; transcription factor binding	nucleus; nuclear chromatin
CALM2	2.3828e-20	0.265991	0.993	0.994	8.7213e-16	regulation of release of sequestered calcium ion into cytosol by sarcoplasmic reticulum; regulation of cardiac muscle contraction by regulation of the release of sequestered calcium ion; regulation of heart rate; phosphorylation; G protein-coupled receptor signaling pathway; calcium-mediated signaling; substantia nigra development; negative regulation of peptidyl-threonine phosphorylation; detect…	metal ion binding; kinase activity; calcium ion binding; protein binding; ion channel binding; protein domain specific binding; protein kinase binding; titin binding; disordered domain specific binding; protein serine/threonine kinase activator activity; calcium channel inhibitor activity; adenylate cyclase binding; adenylate cyclase activator activity; N-terminal myristoylation domain binding; p…	nucleus; cytoplasm; plasma membrane; cytoskeleton; spindle pole; centrosome; microtubule organizing center; spindle; spindle microtubule; protein-containing complex; vesicle; calcium channel complex; sarcomere; catalytic complex; voltage-gated potassium channel complex; myelin sheath
REV3L	2.46146e-20	-0.338437	0.484	0.649	9.0092e-16	DNA repair; translesion synthesis; nucleic acid phosphodiester bond hydrolysis; cellular response to DNA damage stimulus; DNA replication; double-strand break repair via homologous recombination; DNA-dependent DNA replication; error-prone translesion synthesis	nucleic acid binding; metal ion binding; transferase activity; DNA binding; protein binding; nucleotide binding; nucleotidyltransferase activity; DNA-directed DNA polymerase activity; iron-sulfur cluster binding; 4 iron, 4 sulfur cluster binding	zeta DNA polymerase complex; nucleus; nucleoplasm; nucleolus
RBP1	2.53973e-20	0.505642	0.504	0.319	9.29565e-16	retinoic acid biosynthetic process; vitamin A metabolic process; retinoid metabolic process; lipid homeostasis; regulation of granulocyte differentiation; response to vitamin A; retinol metabolic process; retinoic acid metabolic process	lipid binding; retinal binding; retinol binding; retinoid binding; all-trans-retinol binding	cytosol; cytoplasm; nucleoplasm; lipid droplet; cell body
AKAP7	2.81476e-20	-0.243315	0.064	0.18	1.03023e-15	regulation of protein kinase A signaling; modulation of chemical synaptic transmission; phosphorylation; protein localization; intracellular signal transduction; regulation of membrane repolarization; action potential; ion transport; cellular response to cAMP; positive regulation of potassium ion transmembrane transport; positive regulation of delayed rectifier potassium channel activity	nucleotide binding; protein binding; protein kinase A binding; protein kinase A regulatory subunit binding; protein kinase binding; kinase activity	nucleus; cytoplasm; cytosol; protein-containing complex; hippocampal mossy fiber to CA3 synapse; membrane; plasma membrane; apical plasma membrane; lateral plasma membrane
GALNTL6	2.94928e-20	-0.148656	0.022	0.106	1.07947e-15	protein glycosylation; protein O-linked glycosylation via threonine	metal ion binding; transferase activity; carbohydrate binding; transferase activity, transferring glycosyl groups; polypeptide N-acetylgalactosaminyltransferase activity	membrane; integral component of membrane; Golgi apparatus; Golgi membrane
CACNG2	2.98342e-20	-0.18235	0.046	0.15	1.09196e-15	ion transport; regulation of ion transmembrane transport; calcium ion transport; calcium ion transmembrane transport; regulation of AMPA receptor activity; cardiac conduction; membrane depolarization; neurotransmitter receptor transport, postsynaptic endosome to lysosome; transmission of nerve impulse; postsynaptic neurotransmitter receptor diffusion trapping; neurotransmitter receptor internaliz…	voltage-gated ion channel activity; voltage-gated calcium channel activity; calcium channel activity; protein binding; ionotropic glutamate receptor binding	membrane; integral component of membrane; cell junction; synapse; voltage-gated calcium channel complex; plasma membrane; AMPA glutamate receptor complex; neuron projection; endocytic vesicle membrane; postsynaptic density membrane; cytosol; cell surface; postsynaptic density; somatodendritic compartment; cerebellar mossy fiber; Schaffer collateral - CA1 synapse; hippocampal mossy fiber to CA3 sy…
HPCA	3.22449e-20	-0.293753	0.15	0.306	1.18019e-15	regulation of voltage-gated calcium channel activity; cellular response to calcium ion; brain development; positive regulation of phospholipase activity; response to organic cyclic compound; calcium-mediated signaling; negative regulation of guanylate cyclase activity; activation of phospholipase D activity; positive regulation of adenylate cyclase activity; inner ear development; retina developm…	metal ion binding; calcium ion binding; actin binding; identical protein binding; kinase binding	cytoplasm; membrane; cytosol; extrinsic component of membrane; axon; dendrite membrane; neuronal cell body membrane; dendrite cytoplasm; perikaryon; dendritic spine head; postsynapse; glutamatergic synapse
COX4I1	3.50607e-20	0.250473	0.973	0.971	1.28326e-15	proton transmembrane transport; electron transport chain; mitochondrial electron transport, cytochrome c to oxygen; generation of precursor metabolites and energy; response to nutrient	cytochrome-c oxidase activity; protein binding	membrane; integral component of membrane; nucleus; mitochondrion; mitochondrial inner membrane; mitochondrial respiratory chain complex IV; mitochondrial membrane
HSP90AB1	4.13812e-20	-0.21631	0.997	1	1.51459e-15	positive regulation of protein kinase B signaling; positive regulation of tau-protein kinase activity; protein folding; Fc-gamma receptor signaling pathway involved in phagocytosis; cellular response to heat; response to unfolded protein; negative regulation of cell cycle arrest; regulation of cellular response to heat; xenobiotic metabolic process; neutrophil degranulation; negative regulation o…	RNA binding; nucleotide binding; ATP binding; protein binding; unfolded protein binding; identical protein binding; cadherin binding; TPR domain binding; tau protein binding; histone methyltransferase binding; peptide binding; histone deacetylase binding; kinase binding; double-stranded RNA binding; protein homodimerization activity; protein dimerization activity; heat shock protein binding; diso…	neuronal cell body; nucleus; cytoplasm; membrane; cytosol; mitochondrion; plasma membrane; extracellular region; melanosome; cell surface; nucleoplasm; extracellular exosome; COP9 signalosome; protein-containing complex; secretory granule lumen; ficolin-1-rich granule lumen; perinuclear region of cytoplasm; axonal growth cone; dendritic growth cone; aryl hydrocarbon receptor complex; HSP90-CDC37 …
PRDX2	4.54233e-20	0.286992	0.964	0.955	1.66254e-15	oxidation-reduction process; cell redox homeostasis; cellular oxidant detoxification; negative regulation of apoptotic process; regulation of apoptotic process; response to oxidative stress; removal of superoxide radicals; cellular response to oxidative stress; hydrogen peroxide catabolic process; activation of MAPK activity; respiratory burst involved in inflammatory response; regulation of hydr…	oxidoreductase activity; antioxidant activity; protein binding; peroxidase activity; peroxiredoxin activity; thioredoxin peroxidase activity	cell; cytoplasm; cytosol; extracellular exosome
NAP1L1	4.84909e-20	0.306584	0.952	0.946	1.77482e-15	nucleosome assembly; nervous system development; positive regulation of neurogenesis; positive regulation of neural precursor cell proliferation; positive regulation of cell population proliferation; DNA replication	RNA binding; protein binding	nucleus; cytoplasm; membrane; melanosome
EDIL3	5.68936e-20	-0.270159	0.107	0.246	2.08236e-15	cell adhesion; multicellular organism development; positive regulation of cell-substrate adhesion	metal ion binding; calcium ion binding; integrin binding; extracellular matrix structural constituent	extracellular region; extracellular exosome; collagen-containing extracellular matrix; extracellular vesicle
OLFM3	7.55076e-20	-0.180649	0.028	0.117	2.76365e-15	eye photoreceptor cell development	protein binding	extracellular region; cell junction; synapse; extracellular space; Golgi apparatus; AMPA glutamate receptor complex
LIMCH1	8.28534e-20	-0.306549	0.174	0.333	3.03252e-15	actomyosin structure organization; positive regulation of protein phosphorylation; positive regulation of stress fiber assembly; negative regulation of cell migration; regulation of focal adhesion assembly	metal ion binding; actin binding; myosin II head/neck binding; protein binding	cytoplasm; cytoskeleton; stress fiber; myosin II complex
MT-ND5	9.40947e-20	-0.397378	0.934	0.95	3.44396e-15	oxidation-reduction process; ATP synthesis coupled electron transport; mitochondrial electron transport, NADH to ubiquinone; mitochondrial respiratory chain complex I assembly; response to hypoxia; response to organonitrogen compound; response to hydrogen peroxide	NADH dehydrogenase (ubiquinone) activity; NADH dehydrogenase activity	membrane; integral component of membrane; mitochondrial inner membrane; mitochondrion; respirasome; mitochondrial respiratory chain complex I; neuron projection
DOK5	1.02249e-19	-0.299672	0.141	0.288	3.74242e-15	axon guidance; transmembrane receptor protein tyrosine kinase signaling pathway; neuron differentiation; positive regulation of MAPK cascade; regulation of neurotrophin TRK receptor signaling pathway		cytosol
NPAS3	1.03618e-19	-0.372554	0.143	0.288	3.79254e-15	regulation of transcription, DNA-templated; positive regulation of transcription, DNA-templated; regulation of transcription by RNA polymerase II; positive regulation of transcription by RNA polymerase II	protein dimerization activity; protein binding; DNA binding; DNA-binding transcription factor activity, RNA polymerase II-specific; protein heterodimerization activity	nucleus; cytosol; nucleoplasm; nuclear chromatin
CCDC144NL	1.50748e-19	-0.137853	0.02	0.1	5.51754e-15
NFIB	1.81047e-19	-0.70251	0.173	0.316	6.62649e-15	regulation of transcription, DNA-templated; DNA replication; positive regulation of transcription, DNA-templated; positive regulation of transcription by RNA polymerase II; negative regulation of transcription by RNA polymerase II; brain development; chondrocyte differentiation; glial cell differentiation; principal sensory nucleus of trigeminal nerve development; anterior commissure morphogenesi…	DNA binding; DNA-binding transcription factor activity; DNA-binding transcription factor activity, RNA polymerase II-specific; RNA polymerase II proximal promoter sequence-specific DNA binding; DNA-binding transcription activator activity, RNA polymerase II-specific; double-stranded DNA binding	nucleus; fibrillar center; nuclear chromatin; cerebellar mossy fiber; intracellular
CNRIP1	1.83968e-19	-0.236011	0.144	0.294	6.73342e-15	negative regulation of signaling receptor activity	protein C-terminus binding; type 1 cannabinoid receptor binding	cytoplasm; plasma membrane
CACNA1E	2.22376e-19	-0.174873	0.047	0.149	8.13919e-15	transmembrane transport; ion transport; regulation of ion transmembrane transport; calcium ion transport; calcium ion transmembrane transport; chemical synaptic transmission; membrane depolarization; regulation of insulin secretion; calcium ion import	ion channel activity; voltage-gated ion channel activity; voltage-gated calcium channel activity; calcium channel activity; metal ion binding; calcium ion binding; voltage-gated cation channel activity	membrane; integral component of membrane; voltage-gated calcium channel complex; plasma membrane
SMCO3	2.80547e-19	-0.147235	0.021	0.1	1.02683e-14		protein binding	membrane; integral component of membrane
CDH8	3.28765e-19	-0.334781	0.05	0.152	1.20331e-14	cell adhesion; homophilic cell adhesion via plasma membrane adhesion molecules; cell-cell adhesion; cell-cell junction assembly; synaptic transmission, glutamatergic; adherens junction organization; cell morphogenesis; calcium-dependent cell-cell adhesion via plasma membrane cell adhesion molecules; cell-cell adhesion mediated by cadherin; chemical synaptic transmission; response to cold; regulat…	calcium ion binding; metal ion binding; cadherin binding; protein homodimerization activity; cytoskeletal protein binding; identical protein binding	membrane; integral component of membrane; plasma membrane; cell surface; cell-cell adherens junction; axon terminus; synaptic cleft; catenin complex; synaptic membrane; glutamatergic synapse
C12orf57	3.64236e-19	-0.329694	0.869	0.936	1.33314e-14	cognition; post-embryonic development; regulation of skeletal muscle contraction; corpus callosum morphogenesis; third ventricle development; psychomotor behavior; camera-type eye morphogenesis		cytoplasm; nuclear speck
ACTG1	3.80792e-19	0.276271	0.999	1	1.39374e-14	Fc-gamma receptor signaling pathway involved in phagocytosis; retina homeostasis; platelet aggregation; membrane organization; ephrin receptor signaling pathway; synaptic vesicle endocytosis; cell junction assembly; postsynaptic actin cytoskeleton organization; sarcomere organization; cellular response to interferon-gamma	nucleotide binding; ATP binding; protein binding; identical protein binding; structural constituent of cytoskeleton; ubiquitin protein ligase binding; profilin binding; structural constituent of postsynaptic actin cytoskeleton	nucleus; cytoplasm; membrane; plasma membrane; extracellular space; cytoskeleton; cytosol; extracellular exosome; blood microparticle; actin filament; dense body; focal adhesion; actin cytoskeleton; myofibril; filamentous actin; calyx of Held; phagocytic vesicle; Schaffer collateral - CA1 synapse
ARHGEF12	4.28178e-19	-0.335699	0.338	0.504	1.56717e-14	G protein-coupled receptor signaling pathway; intracellular signal transduction; regulation of Rho protein signal transduction; positive regulation of GTPase activity; Rho protein signal transduction; regulation of small GTPase mediated signal transduction; positive regulation of apoptotic process	G protein-coupled receptor binding; guanyl-nucleotide exchange factor activity; Rho guanyl-nucleotide exchange factor activity; GTPase activator activity; protein binding	cytoplasm; membrane; cytosol; extracellular exosome
SSBP2	4.41227e-19	-0.380094	0.59	0.725	1.61493e-14	positive regulation of transcription by RNA polymerase II; regulation of transcription, DNA-templated	DNA binding; single-stranded DNA binding; protein binding	nucleus; cytoplasm
ELMOD1	6.2351e-19	-0.249858	0.088	0.212	2.28211e-14	positive regulation of GTPase activity	GTPase activator activity	cytosol; nucleoplasm
ARID5B	8.0257e-19	-0.450864	0.356	0.517	2.93749e-14	positive regulation of nucleic acid-templated transcription; regulation of transcription by RNA polymerase II; positive regulation of DNA-binding transcription factor activity; adipose tissue development; negative regulation of transcription by RNA polymerase II; liver development; negative regulation of transcription, DNA-templated; kidney development; nitrogen compound metabolic process; male g…	transcription coactivator activity; DNA binding; protein binding; DNA-binding transcription repressor activity, RNA polymerase II-specific; transcription regulatory region DNA binding; RNA polymerase II regulatory region sequence-specific DNA binding	nucleus; nucleoplasm
SNCB	8.30847e-19	-0.152248	0.037	0.13	3.04098e-14	negative regulation of catalytic activity; response to metal ion; chemical synaptic transmission; dopamine metabolic process; negative regulation of neuron apoptotic process; synaptic vesicle endocytosis; synapse organization	calcium ion binding; cuprous ion binding; phospholipase inhibitor activity; transition metal ion binding	cytoplasm; presynapse; cytosol; inclusion body; synapse
HLA-B	8.64961e-19	-0.349807	0.235	0.397	3.16584e-14	immune response; immune system process; regulation of immune response; antigen processing and presentation; antigen processing and presentation of peptide antigen via MHC class I; antigen processing and presentation of exogenous peptide antigen via MHC class I, TAP-dependent; viral process; neutrophil degranulation; interferon-gamma-mediated signaling pathway; type I interferon signaling pathway;…	protein binding; peptide antigen binding; signaling receptor binding	membrane; integral component of membrane; endoplasmic reticulum; Golgi apparatus; cell surface; extracellular space; external side of plasma membrane; plasma membrane; integral component of plasma membrane; MHC class I protein complex; extracellular exosome; phagocytic vesicle membrane; secretory granule membrane; Golgi membrane; ER to Golgi transport vesicle membrane; integral component of lumen…
ZNF883	9.73429e-19	-0.227837	0.127	0.269	3.56285e-14	;	; nucleic acid binding; metal ion binding; DNA binding	; nucleus
CHMP3	1.011e-18	0.356181	0.425	0.266	3.70036e-14	protein transport; cell division; cell cycle; apoptotic process; vacuolar transport; protein heterooligomerization; endosomal transport; macroautophagy; viral life cycle; multivesicular body assembly; viral budding via host ESCRT complex; late endosome to vacuole transport; protein polymerization; regulation of centrosome duplication; endosome transport via multivesicular body sorting pathway; re…	protein homodimerization activity; protein binding; phosphatidylcholine binding; ubiquitin-specific protease binding	cytoplasm; membrane; cytosol; plasma membrane; cytoplasmic vesicle; endosome; late endosome membrane; extracellular exosome; ESCRT III complex; multivesicular body; late endosome
PID1	1.05041e-18	-0.198693	0.064	0.176	3.84462e-14	positive regulation of gene expression; positive regulation of transcription by RNA polymerase II; cellular response to tumor necrosis factor; cellular response to fatty acid; regulation of reactive oxygen species metabolic process; negative regulation of glucose import; negative regulation of insulin receptor signaling pathway; cellular response to cytokine stimulus; regulation of cell populatio…	protein binding	cytoplasm
MLLT3	1.06404e-18	-0.308374	0.347	0.526	3.89449e-14	regulation of transcription, DNA-templated; positive regulation of transcription, DNA-templated; regulation of transcription by RNA polymerase II; segment specification; anterior/posterior pattern specification; transcription by RNA polymerase II; transcription elongation from RNA polymerase II promoter; negative regulation of canonical Wnt signaling pathway; positive regulation of Wnt signaling …	protein binding; DNA-binding transcription factor activity, RNA polymerase II-specific; chromatin binding; histone binding; lysine-acetylated histone binding; modification-dependent protein binding	nucleus; chromosome; nucleoplasm; extracellular exosome; transcription elongation factor complex
DLGAP1	1.27191e-18	-0.218789	0.092	0.218	4.65531e-14	chemical synaptic transmission; signaling	protein binding; protein-containing complex binding	synapse; membrane; plasma membrane; cell junction; postsynaptic membrane; postsynaptic density
INHBA-AS1	1.94749e-18	-0.203683	0.089	0.214	7.12799e-14
NPTXR	2.43899e-18	-0.241867	0.133	0.27	8.92695e-14	regulation of postsynaptic neurotransmitter receptor activity	metal ion binding	membrane; integral component of membrane; glutamatergic synapse
GNG4	3.04599e-18	0.556506	0.667	0.562	1.11486e-13	G protein-coupled receptor signaling pathway; signal transduction; regulation of G protein-coupled receptor signaling pathway; negative regulation of cell growth	GTPase activity; protein binding; G-protein beta-subunit binding	membrane; plasma membrane; heterotrimeric G-protein complex; G-protein beta/gamma-subunit complex; extracellular exosome
SGK1	3.61341e-18	-0.145817	0.027	0.109	1.32254e-13	protein phosphorylation; phosphorylation; apoptotic process; intracellular signal transduction; ion transmembrane transport; peptidyl-serine phosphorylation; regulation of cell population proliferation; neuron projection morphogenesis; regulation of cell growth; sodium ion transport; cellular response to DNA damage stimulus; long-term memory; regulation of blood pressure; regulation of cell migra…	nucleotide binding; protein kinase activity; protein serine/threonine kinase activity; ATP binding; kinase activity; transferase activity; protein binding; potassium channel regulator activity; protein serine/threonine/tyrosine kinase activity; calcium channel regulator activity; sodium channel regulator activity; chloride channel regulator activity; phosphatidylinositol binding	nucleus; cytoplasm; nuclear speck; membrane; cytosol; endoplasmic reticulum; endoplasmic reticulum membrane; mitochondrion; plasma membrane
CHD5	4.16887e-18	-0.289483	0.25	0.42	1.52585e-13	chromatin organization; DNA duplex unwinding; cell differentiation; spermatogenesis; nervous system development; negative regulation of cell population proliferation; histone H4 acetylation; regulation of transcription involved in cell fate commitment; spermatogenesis, exchange of chromosomal proteins; histone H3-K27 trimethylation; cerebral cortex neuron differentiation; positive regulation of s…	metal ion binding; nucleotide binding; ATP binding; hydrolase activity; DNA binding; DNA helicase activity; helicase activity; H3K27me3 modified histone binding	nucleus; nuclear speck; membrane; cytosol; nucleoplasm; heterochromatin; NuRD complex
ARX	4.69285e-18	0.318162	0.595	0.395	1.71763e-13	regulation of transcription, DNA-templated; multicellular organism development; cell differentiation; nervous system development; negative regulation of transcription by RNA polymerase II; neuron migration; axon guidance; positive regulation of gene expression; globus pallidus development; olfactory bulb development; cerebral cortex tangential migration; embryonic olfactory bulb interneuron precu…	DNA binding; sequence-specific DNA binding; DNA-binding transcription factor activity, RNA polymerase II-specific; RNA polymerase II regulatory region sequence-specific DNA binding; RNA polymerase II distal enhancer sequence-specific DNA binding; DNA-binding transcription repressor activity, RNA polymerase II-specific; chromatin binding	nucleus; nuclear chromatin
ANKRD12	4.7635e-18	-0.277153	0.92	0.962	1.74349e-13		protein binding	nucleus; cytosol; nucleoplasm
LAPTM4B	5.60102e-18	0.624859	0.616	0.517	2.05003e-13	endosome organization; negative regulation of lysosomal protein catabolic process; endosome transport via multivesicular body sorting pathway; negative regulation of transforming growth factor beta1 production; regulation of lysosomal membrane permeability; regulation of lysosome organization	protein binding; ubiquitin protein ligase binding; kinase binding; phosphatidylinositol bisphosphate binding; ceramide binding	membrane; integral component of membrane; lysosomal membrane; plasma membrane; cell projection; lysosome; endosome; early endosome; late endosome membrane; endosome membrane; endomembrane system; multivesicular body membrane; multivesicular body, internal vesicle
SLC4A10	6.3094e-18	-0.179612	0.064	0.171	2.3093e-13	ion transport; sodium ion transport; chloride transport; anion transport; anion transmembrane transport; visual perception; regulation of short-term neuronal synaptic plasticity; bicarbonate transport; regulation of intracellular pH; inorganic anion transport; regulation of pH; response to light stimulus; post-embryonic development; pyramidal neuron development; regulation of cellular pH; multice…	symporter activity; antiporter activity; anion transmembrane transporter activity; inorganic anion exchanger activity; sodium:bicarbonate symporter activity; anion:anion antiporter activity	membrane; integral component of membrane; plasma membrane; cell projection; cell junction; synapse; dendrite; axon; perikaryon; basolateral plasma membrane; apical plasma membrane; neuronal cell body; somatodendritic compartment; axon terminus; apical dendrite; basal dendrite; CA3 pyramidal cell dendrite
ZNF483	6.67433e-18	-0.273705	0.157	0.303	2.44287e-13	regulation of transcription, DNA-templated	nucleic acid binding; metal ion binding; DNA binding; DNA-binding transcription factor activity; protein binding	nucleus; intracellular
MSI2	7.25933e-18	0.386665	0.644	0.515	2.65699e-13	stem cell development	nucleic acid binding; RNA binding; protein binding; single-stranded RNA binding; poly(U) RNA binding	cytoplasm; nucleus; ribonucleoprotein complex; polysome
MT-CO3	7.511e-18	0.34829	0.972	0.979	2.7491e-13	proton transmembrane transport; transmembrane transport; respiratory electron transport chain; aerobic respiration; mitochondrial electron transport, cytochrome c to oxygen; respiratory chain complex IV assembly; aerobic electron transport chain	protein binding; cytochrome-c oxidase activity; electron transfer activity; heme-copper terminal oxidase activity; oxidoreduction-driven active transmembrane transporter activity	membrane; integral component of membrane; mitochondrial inner membrane; mitochondrion; respiratory chain complex IV
SEPTIN7	7.58479e-18	-0.248286	0.934	0.974	2.77611e-13	negative regulation of cell migration; negative regulation of G1/S transition of mitotic cell cycle; positive regulation of apoptotic process; cell division; cell cycle; cell differentiation; spermatogenesis; cilium assembly; protein heterooligomerization; cytoskeleton-dependent cytokinesis; regulation of embryonic cell shape; positive regulation of non-motile cilium assembly	nucleotide binding; GTP binding; protein binding; identical protein binding; cadherin binding; GTPase activity; structural molecule activity	nucleus; cytoplasm; motile cilium; chromosome; cytoskeleton; cell projection; septin complex; spindle; midbody; chromosome, centromeric region; kinetochore; condensed chromosome kinetochore; cilium; cytosol; extracellular exosome; stress fiber; axoneme; non-motile cilium; cleavage furrow; microtubule cytoskeleton; apical plasma membrane; septin ring; sperm annulus
TGFBR1	7.6617e-18	0.274521	0.245	0.105	2.80426e-13	transmembrane receptor protein serine/threonine kinase signaling pathway; protein phosphorylation; positive regulation of gene expression; transforming growth factor beta receptor signaling pathway; positive regulation of epithelial to mesenchymal transition; positive regulation of protein kinase B signaling; positive regulation of cell migration; ventricular septum morphogenesis; positive regula…	ATP binding; transmembrane receptor protein serine/threonine kinase activity; metal ion binding; nucleotide binding; protein kinase activity; protein serine/threonine kinase activity; kinase activity; transferase activity; protein binding; transforming growth factor beta receptor activity, type I; transforming growth factor beta binding; SMAD binding; I-SMAD binding; activin binding; type II tran…	membrane; integral component of membrane; intracellular membrane-bounded organelle; plasma membrane; nucleus; cell; cell junction; membrane raft; cell surface; endosome; receptor complex; bicellular tight junction; activin receptor complex
ATP6AP2	9.03298e-18	-0.305788	0.676	0.798	3.30616e-13	positive regulation of Wnt signaling pathway; neutrophil degranulation; angiotensin maturation; rostrocaudal neural tube patterning; positive regulation of transforming growth factor beta1 production; regulation of MAPK cascade; eye pigmentation; head morphogenesis	signaling receptor activity; protein binding; catalytic activity	integral component of membrane; membrane; endoplasmic reticulum; endoplasmic reticulum membrane; lysosomal membrane; plasma membrane; cell projection; cytoplasmic vesicle; lysosome; external side of plasma membrane; axon; extracellular exosome; autophagosome membrane; dendritic spine membrane; tertiary granule membrane; ficolin-1-rich granule membrane; extracellular space; apical plasma membrane;…
MPC1	1.03208e-17	-0.281826	0.369	0.548	3.7775e-13	mitochondrial pyruvate transmembrane transport; mitochondrial acetyl-CoA biosynthetic process from pyruvate; cellular response to leukemia inhibitory factor	pyruvate transmembrane transporter activity	membrane; integral component of membrane; mitochondrion; mitochondrial inner membrane; integral component of mitochondrial inner membrane
UCHL1	1.12023e-17	-0.273879	0.936	0.976	4.10016e-13	protein deubiquitination; proteolysis; ubiquitin-dependent protein catabolic process; negative regulation of MAP kinase activity; regulation of macroautophagy; proteasome-mediated ubiquitin-dependent protein catabolic process; response to ischemia; axonogenesis; axon target recognition; adult walking behavior; cell population proliferation; sensory perception of pain; axonal transport of mitochon…	thiol-dependent ubiquitin-specific protease activity; hydrolase activity; ligase activity; peptidase activity; cysteine-type peptidase activity; thiol-dependent ubiquitinyl hydrolase activity; protein binding; ubiquitin binding; ubiquitin protein ligase binding; cysteine-type endopeptidase activity; alpha-2A adrenergic receptor binding; omega peptidase activity	intracellular; cytoplasm; membrane; cytosol; nucleoplasm; endoplasmic reticulum; endoplasmic reticulum membrane; axon cytoplasm; plasma membrane; axon; neuronal cell body; neuron projection terminus
ELOVL4	1.18078e-17	-0.253312	0.215	0.376	4.32177e-13	lipid metabolic process; fatty acid metabolic process; fatty acid biosynthetic process; unsaturated fatty acid biosynthetic process; fatty acid elongation, saturated fatty acid; fatty acid elongation, polyunsaturated fatty acid; very long-chain fatty acid biosynthetic process; long-chain fatty-acyl-CoA biosynthetic process; sphingolipid biosynthetic process; fatty acid elongation, monounsaturated…	transferase activity; fatty acid elongase activity; 3-oxo-arachidoyl-CoA synthase activity; 3-oxo-cerotoyl-CoA synthase activity; 3-oxo-lignoceronyl-CoA synthase activity; very-long-chain 3-ketoacyl-CoA synthase activity; protein binding; G protein-coupled photoreceptor activity	membrane; integral component of membrane; endoplasmic reticulum; endoplasmic reticulum membrane; integral component of endoplasmic reticulum membrane
NEUROD2	1.21922e-17	-0.23443	0.039	0.13	4.46248e-13	nervous system development; regulation of transcription, DNA-templated; protein ubiquitination; multicellular organism development; negative regulation of nucleic acid-templated transcription; cell differentiation; regulation of neuron differentiation; regulation of transcription by RNA polymerase II; positive regulation of DNA-binding transcription factor activity; cellular response to calcium i…	protein dimerization activity; DNA binding; DNA-binding transcription factor activity, RNA polymerase II-specific; transcription corepressor activity; protein heterodimerization activity; DNA-binding transcription factor activity; E-box binding; RNA polymerase II regulatory region sequence-specific DNA binding; DNA-binding transcription activator activity, RNA polymerase II-specific	nucleus; nuclear chromatin
POU3F2	1.28009e-17	0.479686	0.324	0.174	4.68526e-13	regulation of transcription, DNA-templated; regulation of transcription by RNA polymerase II; cell differentiation; brain development; nervous system development; neuron development; neuron fate specification; neuron differentiation; positive regulation of cell population proliferation; epidermis development; negative regulation of gene expression; astrocyte development; Schwann cell development;…	DNA binding; DNA-binding transcription factor activity; sequence-specific DNA binding; protein binding; identical protein binding; DNA-binding transcription factor activity, RNA polymerase II-specific; RNA polymerase II proximal promoter sequence-specific DNA binding; DNA-binding transcription activator activity, RNA polymerase II-specific; transcription coactivator activity	nucleus; nuclear chromatin; transcription factor complex
CPE	1.33367e-17	-0.295578	0.862	0.92	4.88135e-13	proteolysis; neuropeptide signaling pathway; insulin processing; peptide hormone secretion; protein localization to secretory granule; cellular protein modification process; peptide metabolic process; protein processing; cardiac left ventricle morphogenesis; Wnt signaling pathway; protein localization to membrane	zinc ion binding; metallocarboxypeptidase activity; metal ion binding; hydrolase activity; peptidase activity; metallopeptidase activity; carboxypeptidase activity; cell adhesion molecule binding; neurexin family protein binding	nucleus; membrane; extracellular region; cytoplasmic vesicle; extracellular space; secretory granule membrane; extracellular exosome; plasma membrane; transport vesicle; transport vesicle membrane; Golgi apparatus
RCN1	1.77169e-17	0.385855	0.506	0.367	6.48457e-13	cellular protein metabolic process; post-translational protein modification	metal ion binding; calcium ion binding; protein binding	endoplasmic reticulum; endoplasmic reticulum lumen
C1orf216	1.96623e-17	-0.191039	0.076	0.188	7.1966e-13		protein binding
KCND2	2.4427e-17	-0.157498	0.037	0.126	8.94054e-13	transmembrane transport; ion transport; potassium ion transport; regulation of ion transmembrane transport; protein homooligomerization; potassium ion transmembrane transport; regulation of postsynaptic membrane potential; action potential; neuronal action potential; sensory perception of pain; locomotor rhythm; chemical synaptic transmission; cardiac conduction; cellular response to hypoxia	metal ion binding; ion channel activity; voltage-gated ion channel activity; voltage-gated potassium channel activity; potassium channel activity; protein binding; A-type (transient outward) potassium channel activity; voltage-gated ion channel activity involved in regulation of postsynaptic membrane potential	membrane; integral component of membrane; voltage-gated potassium channel complex; plasma membrane; cell projection; cell junction; synapse; postsynaptic membrane; dendrite; integral component of plasma membrane; perikaryon; neuronal cell body; dendritic spine; glutamatergic synapse; GABA-ergic synapse; integral component of postsynaptic membrane; integral component of postsynaptic specialization…
PLPPR5	2.54815e-17	-0.195401	0.116	0.246	9.32649e-13	phospholipid metabolic process; phospholipid dephosphorylation; positive regulation of filopodium assembly; positive regulation of neuron projection development	hydrolase activity; phosphatidate phosphatase activity; phosphatase activity; lipid phosphatase activity	membrane; integral component of membrane; plasma membrane; integral component of plasma membrane
FOS	2.61814e-17	-0.490365	0.35	0.515	9.58265e-13	transforming growth factor beta receptor signaling pathway; cellular response to reactive oxygen species; positive regulation of transcription, DNA-templated; regulation of transcription, DNA-templated; regulation of transcription by RNA polymerase II; Fc-epsilon receptor signaling pathway; inflammatory response; transcription by RNA polymerase II; cytokine-mediated signaling pathway; positive re…	transcription regulatory region DNA binding; DNA binding; DNA-binding transcription factor activity; protein binding; RNA polymerase II proximal promoter sequence-specific DNA binding; DNA-binding transcription factor activity, RNA polymerase II-specific; R-SMAD binding; protein heterodimerization activity; transcription factor binding; RNA polymerase II core promoter sequence-specific DNA bindin…	nucleus; cytoplasm; nucleoplasm; endoplasmic reticulum; cytosol; transcription factor complex; nuclear chromatin; protein-DNA complex; membrane; transcription factor AP-1 complex; neuron projection
VSTM2L	2.92902e-17	-0.200192	0.094	0.215	1.07205e-12	axon guidance; negative regulation of neuron apoptotic process; homophilic cell adhesion via plasma membrane adhesion molecules; dendrite self-avoidance	protein binding; cell-cell adhesion mediator activity	cytoplasm; extracellular region; plasma membrane; axon
ATP2B2	2.94823e-17	-0.173874	0.075	0.188	1.07908e-12	ion transport; calcium ion transport; calcium ion transmembrane transport; regulation of presynaptic cytosolic calcium ion concentration; ion transmembrane transport; sensory perception of sound; regulation of cardiac conduction; neuron differentiation; cellular calcium ion homeostasis; regulation of cytosolic calcium ion concentration; regulation of postsynaptic cytosolic calcium ion concentrati…	metal ion binding; nucleotide binding; ATP binding; protein binding; calcium transmembrane transporter activity, phosphorylative mechanism; calmodulin binding; PDZ domain binding; calcium-transporting ATPase activity involved in regulation of presynaptic cytosolic calcium ion concentration; calcium-transporting ATPase activity involved in regulation of postsynaptic cytosolic calcium ion concentra…	cytoplasm; membrane; integral component of membrane; presynapse; plasma membrane; cell junction; synapse; extracellular exosome; glutamatergic synapse; postsynaptic density membrane; GABA-ergic synapse
DUSP6	3.09572e-17	0.31756	0.21	0.081	1.13307e-12	protein dephosphorylation; dephosphorylation; peptidyl-tyrosine dephosphorylation; inactivation of MAPK activity; negative regulation of protein phosphorylation; response to organic substance; positive regulation of cell death; response to organic cyclic compound; cell differentiation; response to drug; regulation of heart growth; negative regulation of ERK1 and ERK2 cascade; response to growth f…	hydrolase activity; phosphoprotein phosphatase activity; phosphatase activity; protein tyrosine/serine/threonine phosphatase activity; MAP kinase tyrosine/serine/threonine phosphatase activity; protein tyrosine phosphatase activity	cytoplasm; cytosol; nucleoplasm
RPS3	3.18142e-17	0.282104	0.997	0.992	1.16443e-12	translation; translational initiation; cell division; DNA repair; cellular response to DNA damage stimulus; cell cycle; apoptotic process; chromosome segregation; positive regulation of gene expression; regulation of translation; positive regulation of DNA repair; viral transcription; negative regulation of translation; regulation of apoptotic process; positive regulation of NIK/NF-kappaB signali…	RNA binding; lyase activity; DNA binding; structural constituent of ribosome; protein binding; iron-sulfur cluster binding; microtubule binding; mRNA binding; class I DNA-(apurinic or apyrimidinic site) endonuclease activity; protein kinase binding; DNA-(apurinic or apyrimidinic site) endonuclease activity; enzyme binding; transcription factor binding; tubulin binding; damaged DNA binding; oxidiz…	nucleus; cytoplasm; membrane; endoplasmic reticulum; cytosol; mitochondrial inner membrane; mitochondrion; mitochondrial matrix; ribosome; plasma membrane; small ribosomal subunit; cytoskeleton; cytosolic small ribosomal subunit; nucleolus; focal adhesion; spindle; nucleoplasm; extracellular exosome; ruffle membrane; ribonucleoprotein complex; mitotic spindle; polysome; postsynaptic density; NF-k…
ARRDC4	3.29857e-17	-0.243616	0.17	0.319	1.20731e-12	protein transport; protein ubiquitination; extracellular vesicle biogenesis; positive regulation of ubiquitin-protein transferase activity	protein binding; protein binding, bridging involved in substrate recognition for ubiquitination	membrane; plasma membrane; cytoplasmic vesicle; extracellular vesicle; endosome; early endosome
SLC25A6	3.5266e-17	0.30931	0.85	0.795	1.29077e-12	transmembrane transport; apoptotic process; viral process; regulation of insulin secretion; ADP transport; ATP transport; protein targeting to mitochondrion	transmembrane transporter activity; protein binding; ATP:ADP antiporter activity	nucleus; membrane; integral component of membrane; mitochondrion; mitochondrial inner membrane; TIM23 mitochondrial import inner membrane translocase complex
SDCBP	3.64931e-17	0.356297	0.575	0.434	1.33568e-12	intracellular signal transduction; actin cytoskeleton organization; chemical synaptic transmission; substrate-dependent cell migration, cell extension; positive regulation of cell migration; neutrophil degranulation; regulation of mitotic cell cycle; positive regulation of cell population proliferation; negative regulation of proteasomal ubiquitin-dependent protein catabolic process; positive reg…	protein binding; lipid binding; identical protein binding; phosphatidylinositol-4,5-bisphosphate binding; protein N-terminus binding; protein heterodimerization activity; frizzled binding; interleukin-5 receptor binding; cytoskeletal adaptor activity; syndecan binding; protein C-terminus binding; growth factor binding; neurexin family protein binding; protein homodimerization activity; ephrin rec…	cytoplasm; nucleus; membrane; integral component of membrane; intracellular membrane-bounded organelle; cytosol; nucleoplasm; endoplasmic reticulum; endoplasmic reticulum membrane; nuclear membrane; extracellular space; plasma membrane; cytoskeleton; extracellular region; melanosome; cell junction; membrane raft; focal adhesion; extracellular exosome; blood microparticle; adherens junction; inter…
MEIS3	3.80115e-17	0.373843	0.609	0.471	1.39126e-12	regulation of transcription, DNA-templated; regulation of transcription by RNA polymerase II; positive regulation of transcription by RNA polymerase II; positive regulation of protein kinase B signaling; negative regulation of apoptotic signaling pathway	DNA binding; DNA-binding transcription factor activity, RNA polymerase II-specific; sequence-specific DNA binding; DNA-binding transcription activator activity, RNA polymerase II-specific; chromatin binding	nucleus; nuclear chromatin
ZC3H6	3.9399e-17	-0.2975	0.42	0.596	1.44204e-12	regulation of transcription by RNA polymerase II; negative regulation of transcription, DNA-templated	metal ion binding; DNA-binding transcription factor activity; DNA-binding transcription factor activity, RNA polymerase II-specific	nucleus; nuclear chromatin
BEND5	7.60161e-17	-0.315493	0.361	0.526	2.78227e-12	negative regulation of transcription, DNA-templated	DNA binding; protein binding	Golgi apparatus
DACH2	7.65172e-17	-0.188705	0.067	0.172	2.80061e-12	multicellular organism development; regulation of transcription by RNA polymerase II; regulation of transcription, DNA-templated; development of primary female sexual characteristics	DNA binding; DNA-binding transcription factor activity, RNA polymerase II-specific	nucleus; transcription factor complex
ALDH7A1	1.04476e-16	0.32482	0.334	0.185	3.82392e-12	oxidation-reduction process; lysine catabolic process; sensory perception of sound; cellular aldehyde metabolic process; glycine betaine biosynthetic process from choline; choline catabolic process	oxidoreductase activity; oxidoreductase activity, acting on the aldehyde or oxo group of donors, NAD or NADP as acceptor; protein binding; aldehyde dehydrogenase (NAD) activity; glyceraldehyde-3-phosphate dehydrogenase (NAD+) (non-phosphorylating) activity; L-aminoadipate-semialdehyde dehydrogenase activity; betaine-aldehyde dehydrogenase activity	cytosol; mitochondrion; nucleus; cytoplasm; extracellular exosome; mitochondrial matrix
HINT1	1.10671e-16	0.227117	0.981	0.971	4.05067e-12	apoptotic process; positive regulation of calcium-mediated signaling; signal transduction; regulation of transcription, DNA-templated; intrinsic apoptotic signaling pathway by p53 class mediator; purine ribonucleotide catabolic process	nucleotide binding; hydrolase activity; catalytic activity; protein kinase C binding	nucleus; cytoplasm; cytosol; plasma membrane; extracellular exosome; histone deacetylase complex; cytoskeleton
PGK1	1.24463e-16	-0.413476	0.77	0.855	4.55546e-12	phosphorylation; glycolytic process; epithelial cell differentiation; gluconeogenesis; canonical glycolysis; negative regulation of angiogenesis; plasminogen activation; cellular response to hypoxia; positive regulation of oxidative phosphorylation	nucleotide binding; ATP binding; kinase activity; transferase activity; protein binding; phosphoglycerate kinase activity; ADP binding; protein-disulfide reductase activity	cytoplasm; membrane; membrane raft; cytosol; extracellular exosome; extracellular space
NOL4	1.25179e-16	-0.320888	0.327	0.48	4.58169e-12		RNA binding	nucleus; nucleolus
SPIRE1	1.27938e-16	-0.261015	0.207	0.354	4.68266e-12	protein transport; vesicle-mediated transport; actin nucleation; actin cytoskeleton organization; intracellular transport; cleavage furrow formation; positive regulation of double-strand break repair; polar body extrusion after meiotic divisions; establishment of meiotic spindle localization; formin-nucleated actin cable assembly	actin binding	cytoplasm; membrane; cytosol; nucleoplasm; plasma membrane; cytoskeleton; perinuclear region of cytoplasm; cytoplasmic vesicle; cytoplasmic vesicle membrane; cell cortex; cleavage furrow
POLE4	1.31712e-16	-0.264304	0.159	0.296	4.82078e-12	DNA biosynthetic process; regulation of transcription, DNA-templated; G1/S transition of mitotic cell cycle; histone H3 acetylation; DNA replication initiation; telomere maintenance via semi-conservative replication	transferase activity; DNA binding; protein heterodimerization activity; protein binding; nucleotidyltransferase activity; DNA-directed DNA polymerase activity; DNA-binding transcription factor activity	nucleus; nucleoplasm; Ada2/Gcn5/Ada3 transcription activator complex; epsilon DNA polymerase complex
PAK5	1.51806e-16	-0.295135	0.371	0.533	5.55625e-12	protein phosphorylation; phosphorylation; apoptotic process; signal transduction; cytoskeleton organization; cell migration; cell population proliferation; regulation of cell growth; signal transduction by protein phosphorylation; activation of protein kinase activity; cell growth; learning; memory; locomotory behavior; negative regulation of extrinsic apoptotic signaling pathway	nucleotide binding; protein kinase activity; protein serine/threonine kinase activity; ATP binding; kinase activity; transferase activity; protein binding	nucleus; cytoplasm; nucleoplasm; mitochondrion; synapse
SSTR2	1.59922e-16	-0.223057	0.096	0.215	5.8533e-12	G protein-coupled receptor signaling pathway; signal transduction; negative regulation of cell population proliferation; neuropeptide signaling pathway; G protein-coupled receptor signaling pathway, coupled to cyclic nucleotide second messenger; cellular response to glucocorticoid stimulus; somatostatin signaling pathway; cellular response to estradiol stimulus; regulation of muscle contraction; …	G protein-coupled receptor activity; protein binding; PDZ domain binding; peptide binding; somatostatin receptor activity; neuropeptide binding	cytoplasm; membrane; integral component of membrane; cytosol; plasma membrane; integral component of plasma membrane
SCN2A	1.64633e-16	-0.358069	0.348	0.505	6.02572e-12	transmembrane transport; ion transport; ion transmembrane transport; regulation of ion transmembrane transport; sodium ion transport; nervous system development; memory; sodium ion transmembrane transport; neuron apoptotic process; cellular response to hypoxia; neuronal action potential; membrane depolarization during action potential; myelination; intrinsic apoptotic signaling pathway in respons…	ion channel activity; voltage-gated ion channel activity; sodium channel activity; voltage-gated sodium channel activity; protein binding	membrane; integral component of membrane; plasma membrane; voltage-gated sodium channel complex; axon; integral component of plasma membrane; intrinsic component of plasma membrane; node of Ranvier; sodium channel complex; intercalated disc; T-tubule; paranode region of axon; glutamatergic synapse; integral component of presynaptic membrane
SYT1	1.68283e-16	-0.288057	0.888	0.948	6.15934e-12	neurotransmitter secretion; cell differentiation; vesicle-mediated transport; protein homooligomerization; membrane organization; glutamate secretion; chemical synaptic transmission; regulation of dopamine secretion; synaptic vesicle exocytosis; calcium-ion regulated exocytosis; regulation of calcium ion-dependent exocytosis; synaptic vesicle endocytosis; calcium ion-regulated exocytosis of neuro…	metal ion binding; protein binding; calcium-dependent phospholipid binding; calcium ion binding; SNARE binding; syntaxin binding; clathrin binding; phosphatidylserine binding; syntaxin-1 binding; low-density lipoprotein particle receptor binding; 1-phosphatidylinositol binding; calmodulin binding; phospholipid binding; phosphatidylinositol-4,5-bisphosphate binding; protein C-terminus binding; syn…	cytoplasm; membrane; integral component of membrane; synaptic vesicle; cell junction; cytoplasmic vesicle; synapse; plasma membrane; axon; synaptic vesicle membrane; dense core granule; exocytic vesicle; neuron projection; clathrin-coated vesicle membrane; transport vesicle membrane; chromaffin granule membrane; clathrin-sculpted gamma-aminobutyric acid transport vesicle membrane; clathrin-sculpt…
DNM3	1.74709e-16	-0.232162	0.263	0.435	6.39453e-12	endocytosis; filopodium assembly; mitochondrial fission; synapse assembly; synaptic vesicle budding from presynaptic endocytic zone membrane; receptor internalization; postsynapse organization; regulation of synapse structure or activity; postsynaptic neurotransmitter receptor internalization; synaptic vesicle endocytosis; positive regulation of filopodium assembly; regulation of dendritic spine …	GTPase activity; GTP binding; nucleotide binding; hydrolase activity; protein binding; microtubule binding; type 1 metabotropic glutamate receptor binding; type 5 metabotropic glutamate receptor binding; nitric-oxide synthase binding; structural constituent of postsynapse	cytoplasm; cytoskeleton; perinuclear region of cytoplasm; microtubule; plasma membrane; membrane; synapse; extracellular exosome; postsynaptic density; postsynaptic membrane; dendritic spine; axon; cytoplasmic vesicle; dendritic spine head; postsynaptic endocytic zone membrane; photoreceptor inner segment; Golgi apparatus; synaptic cleft; apical tubulobulbar complex; basal tubulobulbar complex; p…
LMO4	1.98818e-16	-0.470293	0.357	0.507	7.27693e-12	transcription by RNA polymerase II; regulation of cell migration; neural tube closure; positive regulation of kinase activity; ventricular septum development; ventral spinal cord interneuron differentiation; spinal cord motor neuron differentiation; spinal cord association neuron differentiation; negative regulation of protein complex assembly; regulation of cell fate specification; positive regu…	metal ion binding; DNA-binding transcription factor activity; protein binding; transcription factor binding; enhancer sequence-specific DNA binding	cell leading edge; transcription factor complex
GRIP2	2.25018e-16	-0.169255	0.074	0.182	8.23589e-12	positive regulation of signal transduction; neurotransmitter receptor transport, endosome to postsynaptic membrane; Notch signaling pathway; artery smooth muscle contraction; protein transport; positive regulation of blood pressure; vesicle-mediated transport in synapse	receptor signaling complex adaptor activity; protein binding	cytoplasm; membrane; plasma membrane; cytosol; postsynaptic density; dendrite; postsynaptic membrane; glutamatergic synapse
NRIP3	2.2665e-16	-0.16347	0.062	0.163	8.29562e-12	proteolysis	protein binding; aspartic-type endopeptidase activity
NRXN3	2.74504e-16	0.45558	0.548	0.416	1.00471e-11	cell adhesion; axon guidance; learning; social behavior; neuron cell-cell adhesion; adult behavior; vocalization behavior; chemical synaptic transmission; neurotransmitter secretion; synapse assembly; regulation of synaptic vesicle exocytosis; angiogenesis; signal transduction	metal ion binding; signaling receptor activity; cell adhesion molecule binding; neuroligin family protein binding; calcium channel regulator activity; transmembrane signaling receptor activity	membrane; integral component of membrane; plasma membrane; integral component of plasma membrane; presynapse; protein-containing complex; GABA-ergic synapse
GPX4	2.77492e-16	0.272016	0.875	0.797	1.01565e-11	oxidation-reduction process; multicellular organism development; cellular oxidant detoxification; spermatogenesis; response to oxidative stress; phospholipid metabolic process; lipoxygenase pathway; long-chain fatty acid biosynthetic process; chromatin organization; glutathione metabolic process; aging; response to estradiol; regulation of inflammatory response; protein polymerization; negative r…	oxidoreductase activity; peroxidase activity; glutathione peroxidase activity; protein binding; identical protein binding; selenium binding; phospholipid-hydroperoxide glutathione peroxidase activity	nucleus; cytoplasm; nucleoplasm; mitochondrion; cytosol; extracellular exosome; protein-containing complex; nuclear envelope
ENHO	2.83283e-16	-0.286508	0.402	0.556	1.03684e-11	signal transduction; positive regulation of Notch signaling pathway; negative regulation of insulin receptor signaling pathway; negative regulation of insulin secretion; negative regulation of lipid biosynthetic process; negative regulation of RNA polymerase II regulatory region sequence-specific DNA binding	hormone activity	extracellular region; plasma membrane
CITED2	2.93642e-16	0.474432	0.572	0.444	1.07476e-11	negative regulation of apoptotic process; positive regulation of transcription by RNA polymerase II; ventricular septum morphogenesis; outflow tract morphogenesis; negative regulation of cell migration; regulation of transcription, DNA-templated; multicellular organism development; cell differentiation; positive regulation of transcription, DNA-templated; positive regulation of gene expression; h…	DNA-binding transcription factor activity; protein binding; transcription coactivator activity; transcription corepressor activity; chromatin binding; protein domain specific binding; histone acetyltransferase binding; LBD domain binding; RNA polymerase II activating transcription factor binding; SMAD binding	nucleus; nucleoplasm; nuclear chromatin; protein-containing complex
SLC25A3	2.98985e-16	0.259263	0.92	0.899	1.09432e-11	proton transmembrane transport; phosphate ion transmembrane transport	symporter activity; protein-containing complex binding; inorganic phosphate transmembrane transporter activity; phosphate:proton symporter activity	membrane; integral component of membrane; mitochondrion; mitochondrial inner membrane; extracellular exosome; integral component of plasma membrane; integral component of mitochondrial inner membrane
PDLIM7	3.0756e-16	0.32503	0.322	0.182	1.1257e-11	multicellular organism development; cell differentiation; actin cytoskeleton organization; ossification; heart development; muscle structure development; axon guidance; receptor-mediated endocytosis; positive regulation of osteoblast differentiation	metal ion binding; protein binding; actin binding; muscle alpha-actinin binding	cytoplasm; nucleus; focal adhesion; actin cytoskeleton; cytoskeleton; cytosol; filamentous actin; stress fiber; cell-cell adherens junction; Z disc; ruffle
GABRB1	3.61718e-16	-0.128113	0.036	0.119	1.32392e-11	ion transport; ion transmembrane transport; inorganic anion transport; chloride transport; signal transduction; regulation of postsynaptic membrane potential; chemical synaptic transmission; regulation of membrane potential; nervous system process; chloride transmembrane transport; gamma-aminobutyric acid signaling pathway; response to toxic substance; central nervous system neuron development; r…	ion channel activity; transmembrane signaling receptor activity; extracellular ligand-gated ion channel activity; chloride channel activity; GABA-A receptor activity; ligand-gated ion channel activity; GABA-gated chloride ion channel activity; anion channel activity; GABA receptor binding; transmitter-gated ion channel activity involved in regulation of postsynaptic membrane potential	integral component of membrane; membrane; plasma membrane; cell junction; synapse; postsynaptic membrane; chloride channel complex; integral component of plasma membrane; neuron projection; GABA-A receptor complex; nucleus; nuclear envelope; cytoplasm; dendrite; receptor complex; GABA-ergic synapse
NAV1	3.77504e-16	0.383799	0.665	0.548	1.3817e-11	neurogenesis; multicellular organism development; cell differentiation; nervous system development; microtubule bundle formation; neuron migration		cytoplasm; cytoskeleton; microtubule; microtubule cytoskeleton; axon initial segment
TMOD2	4.19228e-16	-0.305887	0.338	0.495	1.53442e-11	pointed-end actin filament capping; nervous system development; muscle contraction; myofibril assembly; neuron-neuron synaptic transmission; learning or memory; positive regulation of G protein-coupled receptor signaling pathway	actin binding; tropomyosin binding	cytoplasm; cytoskeleton; striated muscle thin filament; myofibril; growth cone; neuron projection
PDE4DIP	4.28645e-16	-0.312163	0.438	0.596	1.56888e-11	cellular protein-containing complex assembly; regulation of Golgi organization	protein binding; enzyme binding; molecular adaptor activity	nucleus; cytoplasm; Golgi apparatus; cytoskeleton; centrosome; microtubule organizing center; myofibril
GOLGA8A	4.43937e-16	-0.308119	0.261	0.414	1.62485e-11	Golgi organization		membrane; Golgi apparatus; cytosol; Golgi cis cisterna; cis-Golgi network; Golgi cisterna membrane
EFNA5	4.64606e-16	0.249806	0.171	0.057	1.7005e-11	positive regulation of protein phosphorylation; multicellular organism development; cell differentiation; ephrin receptor signaling pathway; nervous system development; axon guidance; regulation of microtubule cytoskeleton organization; regulation of actin cytoskeleton organization; activation of transmembrane receptor protein tyrosine kinase activity; regulation of GTPase activity; positive regu…	protein binding; ephrin receptor binding; transmembrane receptor protein tyrosine kinase activator activity; neurotrophin TRKA receptor binding; neurotrophin TRKB receptor binding; neurotrophin TRKC receptor binding; chemorepellent activity	membrane; plasma membrane; caveola; anchored component of membrane; anchored component of external side of plasma membrane; basement membrane; adherens junction; cell periphery; GABA-ergic synapse; integral component of membrane
TBR1	4.70047e-16	-0.222609	0.11	0.24	1.72042e-11	regulation of transcription, DNA-templated; positive regulation of transcription by RNA polymerase II; negative regulation of transcription by RNA polymerase II; cell fate specification; negative regulation of transcription, DNA-templated; brain development; heart looping; conditioned taste aversion; specification of animal organ identity; regulation of gene expression; regulation of neuron proje…	DNA binding; DNA-binding transcription factor activity; protein binding; identical protein binding; RNA polymerase II regulatory region sequence-specific DNA binding; DNA-binding transcription activator activity, RNA polymerase II-specific; DNA-binding transcription factor activity, RNA polymerase II-specific; RNA polymerase II activating transcription factor binding; RNA polymerase II proximal p…	nucleus
CRABP1	4.75855e-16	0.336225	0.232	0.384	1.74168e-11	retinoic acid catabolic process; signal transduction; multicellular organism development	protein binding; lipid binding; retinoic acid binding; retinal binding; retinol binding; retinoid binding	cytoplasm; cytosol
SEZ6L	5.01968e-16	-0.181462	0.077	0.185	1.83725e-11	adult locomotory behavior; cerebellar Purkinje cell layer development; synapse maturation; regulation of protein kinase C signaling		membrane; integral component of membrane; endoplasmic reticulum; endoplasmic reticulum membrane; neuronal cell body
GABARAP	5.54721e-16	0.288635	0.941	0.924	2.03034e-11	protein transport; apoptotic process; autophagy; autophagosome assembly; autophagy of mitochondrion; cellular response to nitrogen starvation; macroautophagy; autophagosome maturation; extrinsic apoptotic signaling pathway via death domain receptors; chemical synaptic transmission; microtubule cytoskeleton organization; protein targeting	protein binding; ubiquitin protein ligase binding; microtubule binding; GABA receptor binding; beta-tubulin binding	cytoplasm; membrane; Golgi apparatus; cytoskeleton; Golgi membrane; cytoplasmic vesicle; microtubule; autophagosome; cytosol; autophagosome membrane; axoneme; endomembrane system; plasma membrane; lysosome; smooth endoplasmic reticulum; microtubule associated complex; actin cytoskeleton; cell body; perinuclear region of cytoplasm; sperm midpiece
RPL7	6.14798e-16	0.23258	0.995	0.994	2.25022e-11	maturation of LSU-rRNA from tricistronic rRNA transcript (SSU-rRNA, 5.8S rRNA, LSU-rRNA); translation; rRNA processing; viral transcription; ribosomal large subunit biogenesis; translational initiation; nuclear-transcribed mRNA catabolic process, nonsense-mediated decay; SRP-dependent cotranslational protein targeting to membrane	structural constituent of ribosome; RNA binding; protein binding; DNA binding; protein homodimerization activity; mRNA binding	cytosolic large ribosomal subunit; nucleus; cytoplasm; membrane; ribosome; nucleolus; focal adhesion; cytosol; ribonucleoprotein complex; postsynaptic density
SAMD3	6.93885e-16	-0.216385	0.041	0.127	2.53969e-11		protein binding
BTBD6	7.85705e-16	-0.186105	0.133	0.265	2.87576e-11	post-translational protein modification; neurogenesis	protein binding	cytoplasm; cytosol
ERBB4	8.56342e-16	-0.52987	0.17	0.297	3.1343e-11	protein phosphorylation; phosphorylation; transmembrane receptor protein tyrosine kinase signaling pathway; signal transduction; apoptotic process; multicellular organism development; positive regulation of transcription, DNA-templated; nervous system development; positive regulation of protein phosphorylation; heart development; negative regulation of cell population proliferation; cell migratio…	nucleotide binding; protein kinase activity; ATP binding; kinase activity; transferase activity; protein tyrosine kinase activity; transmembrane receptor protein tyrosine kinase activity; protein homodimerization activity; protein binding; transcription regulatory region DNA binding; epidermal growth factor receptor binding	nucleus; membrane; integral component of membrane; mitochondrion; plasma membrane; postsynaptic membrane; extracellular region; integral component of plasma membrane; receptor complex; nucleoplasm; cytosol; mitochondrial matrix; basal plasma membrane; basolateral plasma membrane; glutamatergic synapse; GABA-ergic synapse; integral component of presynaptic membrane; integral component of postsynap…
GSTM3	9.96755e-16	-0.300779	0.484	0.624	3.64822e-11	glutathione metabolic process; response to estrogen; glutathione derivative biosynthetic process; nitrobenzene metabolic process; xenobiotic catabolic process; cellular detoxification of nitrogen compound; establishment of blood-nerve barrier	transferase activity; protein binding; glutathione transferase activity; identical protein binding; protein homodimerization activity; enzyme binding; glutathione binding	cytoplasm; nucleus; cytosol; intercellular bridge; extracellular exosome; sperm fibrous sheath
PODXL2	1.08237e-15	-0.291261	0.478	0.627	3.96159e-11	cell adhesion; leukocyte tethering or rolling	protein binding; glycosaminoglycan binding	membrane; integral component of membrane; integral component of plasma membrane; Golgi lumen
PEBP1	1.1393e-15	-0.2151	0.98	0.986	4.16995e-11	negative regulation of endopeptidase activity; negative regulation of peptidase activity; MAPK cascade; negative regulation of MAPK cascade	RNA binding; nucleotide binding; ATP binding; protein binding; lipid binding; serine-type endopeptidase inhibitor activity; peptidase inhibitor activity; protein kinase binding; enzyme binding; phosphatidylethanolamine binding	nucleus; cytoplasm; cytosol; extracellular exosome
TPM1	1.22695e-15	-0.303812	0.526	0.668	4.49075e-11	negative regulation of vascular smooth muscle cell proliferation; negative regulation of vascular associated smooth muscle cell migration; negative regulation of cell migration; cellular response to reactive oxygen species; regulation of cell shape; actin filament organization; ruffle organization; positive regulation of stress fiber assembly; muscle contraction; cardiac muscle contraction; ventr…	actin binding; protein homodimerization activity; protein binding; actin filament binding; identical protein binding; protein heterodimerization activity; cytoskeletal protein binding; structural constituent of muscle; structural constituent of cytoskeleton	cytoplasm; cytosol; actin cytoskeleton; cytoskeleton; actin filament; ruffle membrane; sarcomere; muscle thin filament tropomyosin; stress fiber; bleb; membrane; integral component of membrane
ECI1	1.28984e-15	0.299015	0.335	0.194	4.72095e-11	lipid metabolic process; fatty acid metabolic process; fatty acid beta-oxidation	isomerase activity; catalytic activity; dodecenoyl-CoA delta-isomerase activity; enoyl-CoA hydratase activity	mitochondrion; mitochondrial matrix
VEGFA	1.40352e-15	-0.27281	0.248	0.402	5.13702e-11	signal transduction; positive regulation of blood vessel endothelial cell migration; negative regulation of gene expression; positive regulation of angiogenesis; positive regulation of cell population proliferation; positive regulation of endothelial cell migration; cellular response to vascular endothelial growth factor stimulus; positive regulation of blood vessel endothelial cell proliferation…	growth factor activity; heparin binding; protein binding; identical protein binding; chemoattractant activity; protein homodimerization activity; receptor ligand activity; cytokine activity; protein heterodimerization activity; vascular endothelial growth factor receptor binding; vascular endothelial growth factor receptor 2 binding; platelet-derived growth factor receptor binding; fibronectin bi…	membrane; extracellular space; cytoplasm; extracellular region; cell surface; platelet alpha granule lumen; extracellular matrix; secretory granule; cell-cell adherens junction
GABBR2	1.50168e-15	-0.179877	0.194	0.348	5.49629e-11	G protein-coupled receptor signaling pathway; signal transduction; gamma-aminobutyric acid signaling pathway; chemical synaptic transmission; negative regulation of adenylate cyclase activity; neuron-glial cell signaling	G protein-coupled receptor activity; protein binding; G protein-coupled GABA receptor activity; protein heterodimerization activity	membrane; integral component of membrane; plasma membrane; cell junction; synapse; postsynaptic membrane; integral component of plasma membrane; cytoplasm; neuron projection; G protein-coupled receptor heterodimeric complex; GABA receptor complex
EPHA7	1.94166e-15	-0.208726	0.094	0.207	7.10666e-11	protein phosphorylation; phosphorylation; transmembrane receptor protein tyrosine kinase signaling pathway; peptidyl-tyrosine phosphorylation; apoptotic process; multicellular organism development; nervous system development; axon guidance; ephrin receptor signaling pathway; brain development; positive regulation of neuron apoptotic process; negative chemotaxis; regulation of ERK1 and ERK2 cascad…	nucleotide binding; protein kinase activity; ATP binding; kinase activity; transferase activity; protein tyrosine kinase activity; transmembrane receptor protein tyrosine kinase activity; ephrin receptor activity; protein binding; chemorepellent activity; transmembrane-ephrin receptor activity; GPI-linked ephrin receptor activity; axon guidance receptor activity; ephrin receptor binding	membrane; integral component of membrane; integral component of plasma membrane; plasma membrane; receptor complex; neuron projection; dendrite; neuromuscular junction; neuronal cell body; postsynaptic membrane; Schaffer collateral - CA1 synapse; hippocampal mossy fiber to CA3 synapse; glutamatergic synapse; integral component of postsynaptic specialization membrane; integral component of postsyn…
PGAM1	2.01609e-15	-0.301429	0.631	0.751	7.37908e-11	glycolytic process; neutrophil degranulation; gluconeogenesis; canonical glycolysis; regulation of glycolytic process; respiratory burst; regulation of pentose-phosphate shunt	isomerase activity; hydrolase activity; catalytic activity; protein binding; bisphosphoglycerate mutase activity; phosphoglycerate mutase activity; intramolecular transferase activity, phosphotransferases; protein kinase binding	cytoplasm; membrane; cytosol; extracellular region; extracellular exosome; secretory granule lumen; ficolin-1-rich granule lumen
MYCBP2	2.21921e-15	-0.278474	0.627	0.756	8.12253e-11	protein ubiquitination; rhythmic process; circadian regulation of gene expression; positive regulation of protein ubiquitination; motor neuron axon guidance; branchiomotor neuron axon guidance; central nervous system projection neuron axonogenesis; regulation of protein localization; negative regulation of protein catabolic process; cell morphogenesis involved in neuron differentiation; neuromusc…	metal ion binding; transferase activity; zinc ion binding; protein binding; ubiquitin protein ligase activity; guanyl-nucleotide exchange factor activity; Ran GTPase binding; protein homodimerization activity	nucleus; cytoplasm; membrane; intracellular membrane-bounded organelle; cytoskeleton; cell projection; axon; microtubule cytoskeleton
POU3F4	2.30402e-15	0.396848	0.336	0.195	8.43294e-11	regulation of transcription, DNA-templated; regulation of transcription by RNA polymerase II; brain development; transcription by RNA polymerase II; sensory perception of sound; forebrain neuron differentiation; inner ear development; cochlea morphogenesis; negative regulation of mesenchymal cell apoptotic process	DNA binding; DNA-binding transcription factor activity; sequence-specific DNA binding; RNA polymerase II regulatory region sequence-specific DNA binding; AT DNA binding; double-stranded DNA binding	nucleus
HNRNPA1	2.37689e-15	0.246672	0.979	0.971	8.69966e-11	mRNA processing; RNA splicing; mRNA transport; mRNA splicing, via spliceosome; viral process; positive regulation of telomere maintenance via telomerase; cellular response to sodium arsenite; fibroblast growth factor receptor signaling pathway; RNA metabolic process; negative regulation of telomere maintenance via telomerase; regulation of alternative mRNA splicing, via spliceosome; RNA export fr…	nucleic acid binding; RNA binding; protein binding; mRNA binding; protein domain specific binding; telomeric repeat-containing RNA binding; single-stranded DNA binding; single-stranded RNA binding; miRNA binding; pre-mRNA binding; G-rich strand telomeric DNA binding	nucleus; cytoplasm; membrane; nucleoplasm; spliceosomal complex; catalytic step 2 spliceosome; extracellular exosome; ribonucleoprotein complex
METRN	2.48354e-15	0.319195	0.328	0.191	9.08999e-11	signal transduction; multicellular organism development; cell differentiation; nervous system development; glial cell differentiation; positive regulation of axonogenesis	hormone activity	extracellular region; extracellular space
FBLN1	2.5602e-15	0.295493	0.239	0.112	9.37059e-11	extracellular matrix organization; positive regulation of peptidase activity; viral process; negative regulation of protein phosphorylation; negative regulation of cell adhesion; negative regulation of ERK1 and ERK2 cascade; negative regulation of substrate adhesion-dependent cell spreading; blood coagulation, fibrin clot formation; negative regulation of cell motility; negative regulation of ste…	protein binding; calcium ion binding; peptidase activator activity; fibronectin binding; identical protein binding; protein C-terminus binding; extracellular matrix structural constituent; protein-containing complex binding; fibrinogen binding	extracellular region; collagen-containing extracellular matrix; extracellular space; extracellular exosome; extracellular matrix; elastic fiber; basement membrane
LSM3	3.30562e-15	-0.280589	0.67	0.801	1.20989e-10	mRNA processing; RNA splicing; mRNA splicing, via spliceosome; nuclear-transcribed mRNA catabolic process; cytoplasmic mRNA processing body assembly; exonucleolytic catabolism of deadenylated mRNA	RNA binding; protein binding	nucleus; spliceosomal complex; catalytic step 2 spliceosome; P-body; nucleoplasm; cytosol; U4/U6 x U5 tri-snRNP complex; Lsm1-7-Pat1 complex; U2-type precatalytic spliceosome; U6 snRNP; Lsm2-8 complex
SPIN1	3.33261e-15	-0.274882	0.497	0.659	1.21977e-10	chromatin organization; cell cycle; gamete generation; multicellular organism development; Wnt signaling pathway; meiotic cell cycle; positive regulation of Wnt signaling pathway; positive regulation of transcription, DNA-templated; rRNA transcription	protein binding; methylated histone binding	nucleus; cytosol; nucleoplasm; nuclear membrane; spindle; nucleolus
GABRA2	3.34996e-15	-0.232289	0.099	0.213	1.22612e-10	ion transport; chloride transport; gamma-aminobutyric acid signaling pathway; ion transmembrane transport; signal transduction; chemical synaptic transmission; regulation of membrane potential; nervous system process; chloride transmembrane transport; neurotransmitter transport; inhibitory synapse assembly; synaptic transmission, GABAergic; regulation of postsynaptic membrane potential; regulatio…	ion channel activity; transmembrane signaling receptor activity; chloride channel activity; GABA-A receptor activity; extracellular ligand-gated ion channel activity; transmitter-gated ion channel activity involved in regulation of postsynaptic membrane potential; benzodiazepine receptor activity; inhibitory extracellular ligand-gated ion channel activity; GABA-gated chloride ion channel activity	membrane; integral component of membrane; plasma membrane; cell projection; cell junction; cytoplasmic vesicle; synapse; postsynaptic membrane; cytoplasmic vesicle membrane; chloride channel complex; dendrite; integral component of plasma membrane; neuron projection; postsynapse; integral component of synaptic vesicle membrane; dendrite membrane; GABA-A receptor complex; axon; neuronal cell body;…
NFIA	3.58382e-15	-0.338925	0.104	0.218	1.31172e-10	regulation of transcription, DNA-templated; DNA replication; positive regulation of transcription by RNA polymerase II; negative regulation of transcription by RNA polymerase II; viral genome replication; synapse maturation; ureter development	DNA binding; DNA-binding transcription factor activity; DNA-binding transcription factor activity, RNA polymerase II-specific; RNA polymerase II proximal promoter sequence-specific DNA binding; DNA-binding transcription activator activity, RNA polymerase II-specific; transcription factor binding; chromatin binding	nucleus; nucleoplasm; cell junction; intracellular; nuclear chromatin
VGF	3.6031e-15	-0.447237	0.269	0.41	1.31877e-10	signal transduction; defense response to bacterium; cellular protein metabolic process; post-translational protein modification; ovarian follicle development; response to dietary excess; generation of precursor metabolites and energy; response to cold; sexual reproduction; insulin secretion; response to insulin; glucose homeostasis; response to cAMP	growth factor activity; neuropeptide hormone activity	Golgi apparatus; intracellular membrane-bounded organelle; extracellular space; extracellular region; cytoplasmic vesicle; endoplasmic reticulum lumen; transport vesicle
AFMID	4.33933e-15	-0.179807	0.068	0.166	1.58824e-10	tryptophan catabolic process to kynurenine; NAD biosynthetic process; tryptophan catabolic process; 'de novo' NAD biosynthetic process from tryptophan; catabolic process	hydrolase activity; arylformamidase activity	nucleus; cytoplasm; cytosol
GRID2	4.7604e-15	-0.355587	0.184	0.314	1.74235e-10	ion transport; ion transmembrane transport; ionotropic glutamate receptor signaling pathway; modulation of chemical synaptic transmission; positive regulation of synapse assembly; synaptic transmission, glutamatergic; excitatory synapse assembly; heterophilic cell-cell adhesion via plasma membrane cell adhesion molecules; glutamate receptor signaling pathway; regulation of neuron projection devel…	ion channel activity; signaling receptor activity; ionotropic glutamate receptor activity; ligand-gated ion channel activity; protein binding; glutamate receptor activity; scaffold protein binding; transmitter-gated ion channel activity involved in regulation of postsynaptic membrane potential; PDZ domain binding	membrane; integral component of membrane; plasma membrane; cell junction; synapse; postsynaptic membrane; integral component of plasma membrane; dendritic spine; postsynaptic density membrane; ionotropic glutamate receptor complex; somatodendritic compartment; parallel fiber to Purkinje cell synapse; glutamatergic synapse; integral component of postsynaptic density membrane
PTMS	4.77117e-15	0.236845	0.986	0.982	1.7463e-10	immune system process; DNA replication		nucleus
SINHCAF	5.21933e-15	0.348476	0.471	0.329	1.91033e-10	positive regulation of cell population proliferation; negative regulation of cell differentiation; negative regulation of cell migration	protein binding	nucleus; Sin3 complex
DPYSL3	6.74452e-15	-0.287041	0.809	0.863	2.46856e-10	actin filament bundle assembly; regulation of cell migration; regulation of neuron projection development; response to axon injury; positive regulation of filopodium assembly; protein homooligomerization; negative regulation of cell migration; positive regulation of neuron projection development; negative regulation of neuron projection development; cellular response to cytokine stimulus; actin c…	hydrolase activity; protein binding; hydrolase activity, acting on carbon-nitrogen (but not peptide) bonds; SH3 domain binding; chondroitin sulfate binding; hydrolase activity, acting on carbon-nitrogen (but not peptide) bonds, in cyclic amides; filamin binding	cytoplasm; extracellular space; cytosol; cell projection; lamellipodium; growth cone; filamentous actin; cell body; exocytic vesicle; synapse
EEF1A1	7.06448e-15	0.190741	1	1	2.58567e-10	translation; translational elongation; neutrophil degranulation; cellular response to epidermal growth factor stimulus; regulation of chaperone-mediated autophagy; regulation of D-erythro-sphingosine kinase activity	RNA binding; nucleotide binding; GTPase activity; GTP binding; protein binding; translation elongation factor activity; tRNA binding; protein kinase binding; kinase binding	nucleus; cytoplasm; membrane; extracellular space; cytosol; plasma membrane; nucleolus; extracellular region; extracellular exosome; ruffle membrane; secretory granule lumen; ficolin-1-rich granule lumen; cortical actin cytoskeleton; eukaryotic translation elongation factor 1 complex; cytoplasmic side of lysosomal membrane
RALYL	8.42111e-15	0.426025	0.414	0.283	3.08221e-10		nucleic acid binding; RNA binding; protein binding; identical protein binding	nucleus
PON2	8.70992e-15	0.241857	0.142	0.042	3.18792e-10	lipoxygenase pathway; response to toxic substance; aromatic compound catabolic process; response to oxidative stress	arylesterase activity; metal ion binding; hydrolase activity; identical protein binding; acyl-L-homoserine-lactone lactonohydrolase activity	extracellular region; membrane; plasma membrane; integral component of membrane; nucleus; mitochondrion; lysosome; intracellular membrane-bounded organelle
GRM3	9.42447e-15	-0.238453	0.149	0.275	3.44945e-10	G protein-coupled receptor signaling pathway; signal transduction; adenylate cyclase-inhibiting G protein-coupled glutamate receptor signaling pathway; G protein-coupled glutamate receptor signaling pathway; regulation of synaptic transmission, glutamatergic; chemical synaptic transmission; negative regulation of adenylate cyclase activity	G protein-coupled receptor activity; group II metabotropic glutamate receptor activity; calcium channel regulator activity; glutamate receptor activity	membrane; integral component of membrane; plasma membrane; integral component of plasma membrane; postsynaptic density; axon; presynaptic membrane; neuron projection; dendritic spine; postsynaptic membrane; glutamatergic synapse; integral component of postsynaptic membrane; integral component of presynaptic membrane
ITM2B	9.61833e-15	-0.24467	0.815	0.889	3.5204e-10	cellular protein metabolic process; nervous system development; negative regulation of amyloid precursor protein biosynthetic process	protein binding; amyloid-beta binding; ATP binding	membrane; integral component of membrane; Golgi apparatus; intracellular membrane-bounded organelle; extracellular space; plasma membrane; extracellular region; Golgi membrane; endosome; extracellular exosome; endosome membrane; integral component of organelle membrane; Golgi-associated vesicle membrane
GPR22	9.94341e-15	-0.189052	0.072	0.17	3.63939e-10	G protein-coupled receptor signaling pathway; signal transduction; cell projection organization	G protein-coupled receptor activity	membrane; integral component of membrane; plasma membrane
STXBP5-AS1	1.01494e-14	-0.149694	0.057	0.149	3.71478e-10
PPP1R14C	1.05793e-14	-0.186408	0.068	0.164	3.87214e-10	negative regulation of phosphoprotein phosphatase activity; regulation of phosphorylation	protein phosphatase inhibitor activity; protein serine/threonine phosphatase inhibitor activity	cytoplasm; membrane
TENM2	1.17947e-14	-0.264067	0.118	0.229	4.31697e-10	signal transduction; cell adhesion; negative regulation of transcription by RNA polymerase II; positive regulation of filopodium assembly; cell-cell adhesion; heterophilic cell-cell adhesion via plasma membrane cell adhesion molecules; neuron development	calcium ion binding; protein homodimerization activity; protein heterodimerization activity; cell adhesion molecule binding	nucleus; membrane; integral component of membrane; integral component of plasma membrane; endoplasmic reticulum; Golgi apparatus; plasma membrane; cell projection; cell junction; synapse; postsynaptic membrane; dendrite; neuron projection; filopodium; growth cone; dendritic spine; PML body
TNR	1.18217e-14	-0.118836	0.034	0.112	4.32685e-10	cell adhesion; regulation of neurogenesis; extracellular matrix organization; axon guidance; neuron cell-cell adhesion; associative learning; negative regulation of neuron projection development; telencephalon cell migration; negative regulation of cell-cell adhesion; negative regulation of axon extension; locomotory exploration behavior; negative regulation of axon extension involved in regenera…	protein binding	extracellular region; collagen-containing extracellular matrix; cell surface; extracellular matrix; membrane raft; perineuronal net; Schaffer collateral - CA1 synapse; glutamatergic synapse
PTPRA	1.26353e-14	-0.244995	0.537	0.69	4.62463e-10	protein dephosphorylation; dephosphorylation; peptidyl-tyrosine dephosphorylation; MAPK cascade; axon guidance; protein phosphorylation; insulin receptor signaling pathway; modulation of chemical synaptic transmission	hydrolase activity; phosphoprotein phosphatase activity; protein binding; protein tyrosine phosphatase activity; phosphatase activity; transmembrane receptor protein tyrosine phosphatase activity	membrane; integral component of membrane; plasma membrane; extracellular exosome; integral component of plasma membrane; receptor complex; Schaffer collateral - CA1 synapse; integral component of synaptic membrane
PGM2L1	1.80393e-14	-0.342619	0.621	0.731	6.60256e-10	carbohydrate metabolic process; organic substance metabolic process; glucose metabolic process; canonical glycolysis; glycogen biosynthetic process; glycogen catabolic process; galactose catabolic process	metal ion binding; transferase activity; isomerase activity; intramolecular transferase activity, phosphotransferases; glucose-1,6-bisphosphate synthase activity	cytosol
TLN2	2.02274e-14	-0.192155	0.097	0.205	7.40341e-10	cell adhesion; cytoskeletal anchoring at plasma membrane; cell-cell junction assembly; endocytosis	actin binding; actin filament binding; protein binding; structural constituent of cytoskeleton; structural molecule activity; clathrin binding	cytoplasm; membrane; plasma membrane; cytoskeleton; cell junction; synapse; focal adhesion; actin cytoskeleton; ruffle
PRXL2A	2.14472e-14	0.313936	0.615	0.486	7.8499e-10	oxidation-reduction process; cellular oxidant detoxification; regulation of osteoclast differentiation	antioxidant activity	cytoplasm; extracellular region
HMGB1	2.23573e-14	-0.273125	0.977	0.985	8.183e-10	positive regulation of blood vessel endothelial cell migration; positive regulation of vascular endothelial cell proliferation; cellular response to lipopolysaccharide; DNA repair; DNA recombination; cellular response to DNA damage stimulus; inflammatory response; autophagy; immune system process; innate immune response; chemotaxis; DNA geometric change; adaptive immune response; positive chemota…	RNA binding; DNA binding; lyase activity; protein binding; cytokine activity; transcription coactivator activity; four-way junction DNA binding; bubble DNA binding; DNA binding, bending; supercoiled DNA binding; transcription factor binding; double-stranded DNA binding; lipopolysaccharide binding; transcription regulatory region DNA binding; repressing transcription factor binding; phosphatidylse…	nucleus; cytoplasm; membrane; chromosome; extracellular space; plasma membrane; extracellular region; cell surface; endosome; nuclear chromatin; nucleoplasm; secretory granule lumen; ficolin-1-rich granule lumen; endoplasmic reticulum-Golgi intermediate compartment; transcriptional repressor complex; condensed chromosome; alphav-beta3 integrin-HMGB1 complex
XPR1	2.30819e-14	-0.429494	0.492	0.617	8.4482e-10	response to virus; viral entry into host cell; G protein-coupled receptor signaling pathway; phosphate ion transmembrane transport; cellular phosphate ion homeostasis; phosphate ion transport; cellular response to phosphate starvation	virus receptor activity; G protein-coupled receptor activity; signaling receptor activity; efflux transmembrane transporter activity; transmembrane signaling receptor activity; inositol hexakisphosphate binding; phosphate ion transmembrane transporter activity	membrane; integral component of membrane; plasma membrane; Golgi apparatus; intrinsic component of plasma membrane
TSPAN13	2.59421e-14	-0.280295	0.559	0.7	9.49505e-10	regulation of calcium ion transmembrane transport	calcium channel regulator activity	membrane; integral component of membrane; integral component of plasma membrane; plasma membrane
ZDBF2	3.02033e-14	-0.217485	0.187	0.32	1.10547e-09		nucleic acid binding; zinc ion binding; metal ion binding
PLXNA4	3.32326e-14	-0.162696	0.07	0.166	1.21635e-09	signal transduction; semaphorin-plexin signaling pathway; nervous system development; axon guidance; motor neuron axon guidance; cranial nerve morphogenesis; facial nerve morphogenesis; facial nerve structural organization; glossopharyngeal nerve morphogenesis; trigeminal nerve morphogenesis; trigeminal nerve structural organization; vagus nerve morphogenesis; postganglionic parasympathetic fiber…	semaphorin receptor activity; protein binding	membrane; integral component of membrane; plasma membrane; integral component of plasma membrane; semaphorin receptor complex
CAMK2B	3.43066e-14	-0.262972	0.254	0.397	1.25566e-09	protein phosphorylation; phosphorylation; multicellular organism development; cell differentiation; nervous system development; regulation of cellular response to heat; signal transduction; protein autophosphorylation; regulation of calcium ion transport; interferon-gamma-mediated signaling pathway; positive regulation of dendritic spine morphogenesis; regulation of neuron migration; positive reg…	nucleotide binding; protein kinase activity; protein serine/threonine kinase activity; ATP binding; kinase activity; transferase activity; actin binding; protein binding; calmodulin-dependent protein kinase activity; calmodulin binding; identical protein binding; protein homodimerization activity	cytoplasm; membrane; cytoskeleton; cell junction; synapse; microtubule organizing center; neuron projection; nucleoplasm; cytosol; sarcoplasmic reticulum; endocytic vesicle membrane; sarcoplasmic reticulum membrane; calcium- and calmodulin-dependent protein kinase complex
ARNT2	3.46244e-14	-0.200086	0.143	0.263	1.26729e-09	regulation of transcription, DNA-templated; positive regulation of transcription, DNA-templated; positive regulation of transcription by RNA polymerase II; response to hypoxia; xenobiotic metabolic process; brain development; in utero embryonic development; central nervous system development; positive regulation of cell population proliferation; response to estradiol; negative regulation of apopt…	protein dimerization activity; DNA binding; DNA-binding transcription factor activity; protein binding; DNA-binding transcription factor activity, RNA polymerase II-specific; protein heterodimerization activity; RNA polymerase II proximal promoter sequence-specific DNA binding; DNA-binding transcription activator activity, RNA polymerase II-specific; aryl hydrocarbon receptor binding	nucleus; cytoplasm; transcription factor complex; nuclear chromatin; nucleoplasm
GRIN2B	3.80261e-14	-0.259942	0.285	0.442	1.39179e-09	negative regulation of dendritic spine maintenance; ion transport; ionotropic glutamate receptor signaling pathway; MAPK cascade; modulation of chemical synaptic transmission; ephrin receptor signaling pathway; chemical synaptic transmission; synaptic transmission, glutamatergic; excitatory postsynaptic potential; brain development; calcium-mediated signaling; regulation of synaptic plasticity; l…	metal ion binding; ion channel activity; zinc ion binding; protein binding; signaling receptor activity; ionotropic glutamate receptor activity; ligand-gated ion channel activity; amyloid-beta binding; glutamate receptor activity; NMDA glutamate receptor activity; glutamate-gated calcium ion channel activity; transmitter-gated ion channel activity involved in regulation of postsynaptic membrane p…	cytoplasm; membrane; integral component of membrane; plasma membrane; cell junction; synapse; postsynaptic membrane; integral component of plasma membrane; postsynaptic density; cell surface; NMDA selective glutamate receptor complex; postsynaptic density membrane; neuron projection; synaptic membrane
CCND2	4.15245e-14	-0.258763	0.311	0.461	1.51984e-09	positive regulation of cell population proliferation; positive regulation of G1/S transition of mitotic cell cycle; negative regulation of apoptotic process; positive regulation of protein phosphorylation; protein phosphorylation; cell division; cell cycle; regulation of cyclin-dependent protein serine/threonine kinase activity; mitotic cell cycle phase transition; positive regulation of cyclin-d…	protein binding; protein kinase binding; protein kinase activity; cyclin-dependent protein serine/threonine kinase regulator activity	nucleus; cytoplasm; membrane; nucleoplasm; cytosol; nucleolus; nuclear membrane; chromatin; cyclin-dependent protein kinase holoenzyme complex
CMIP	5.30452e-14	-0.264322	0.473	0.615	1.94151e-09	in utero embryonic development	protein binding	nucleus; cytoplasm; cytosol; nucleoplasm
NME1	5.63044e-14	-0.307271	0.636	0.724	2.0608e-09	phosphorylation; DNA metabolic process; cell differentiation; nucleoside diphosphate phosphorylation; GTP biosynthetic process; UTP biosynthetic process; CTP biosynthetic process; nucleotide metabolic process; nervous system development; endocytosis; negative regulation of cell population proliferation; regulation of apoptotic process; purine nucleotide metabolic process; pyrimidine nucleotide me…	RNA binding; metal ion binding; nucleotide binding; ATP binding; kinase activity; transferase activity; GTP binding; protein binding; magnesium ion binding; nucleoside diphosphate kinase activity; identical protein binding; ribosomal small subunit binding; deoxyribonuclease activity; RNA polymerase II regulatory region sequence-specific DNA binding; single-stranded DNA binding; intermediate filam…	nucleus; cytoplasm; membrane; cytosol; extracellular exosome; ruffle membrane; mitochondrial outer membrane; centrosome; intermediate filament; perinuclear region of cytoplasm
EOMES	5.86431e-14	-0.212004	0.041	0.119	2.14639e-09	negative regulation of DNA-binding transcription factor activity; regulation of transcription, DNA-templated; multicellular organism development; cell differentiation; positive regulation of transcription, DNA-templated; immune system process; adaptive immune response; positive regulation of transcription by RNA polymerase II; negative regulation of transcription by RNA polymerase II; mesoderm fo…	DNA binding; DNA-binding transcription factor activity; RNA polymerase II regulatory region sequence-specific DNA binding; DNA-binding transcription activator activity, RNA polymerase II-specific; DNA-binding transcription factor activity, RNA polymerase II-specific; RNA polymerase II activating transcription factor binding; sequence-specific DNA binding; chromatin binding	nucleus; nuclear chromatin
NOP56	7.11388e-14	-0.249132	0.53	0.675	2.60375e-09	ribosome biogenesis; rRNA processing	RNA binding; protein binding; cadherin binding; snoRNA binding; histone methyltransferase binding	nucleus; cytoplasm; membrane; fibrillar center; nucleoplasm; nucleolus; small-subunit processome; box C/D snoRNP complex; small nucleolar ribonucleoprotein complex; pre-snoRNP complex
ABCA1	8.01409e-14	0.232405	0.15	0.051	2.93324e-09	cholesterol homeostasis; cellular response to low-density lipoprotein particle stimulus; transmembrane transport; lipid metabolic process; steroid metabolic process; cholesterol metabolic process; regulation of Cdc42 protein signal transduction; response to laminar fluid shear stress; cholesterol efflux; regulation of lipid metabolic process; lipid transport; high-density lipoprotein particle ass…	nucleotide binding; ATP binding; protein binding; ATPase activity; ATPase-coupled transmembrane transporter activity; ATPase-coupled intramembrane lipid transporter activity; lipid transporter activity; phosphatidylcholine binding; ATPase binding; signaling receptor binding; cholesterol binding; phospholipid transporter activity; high-density lipoprotein particle binding; syntaxin binding; small …	perinuclear region of cytoplasm; membrane; integral component of membrane; plasma membrane; endosome; intracellular membrane-bounded organelle; endoplasmic reticulum membrane; integral component of plasma membrane; membrane raft; Golgi apparatus; external side of plasma membrane; cell surface; endocytic vesicle; phagocytic vesicle
PLPPR4	8.1316e-14	-0.15042	0.081	0.181	2.97625e-09	phospholipid dephosphorylation; phospholipid metabolic process; axonogenesis; inner ear development	hydrolase activity; phosphatidate phosphatase activity; phosphatase activity; lipid phosphatase activity	membrane; integral component of membrane; integral component of plasma membrane; plasma membrane; glutamatergic synapse; integral component of postsynaptic density membrane
NECAB2	8.47633e-14	-0.151407	0.066	0.157	3.10242e-09	positive regulation of ERK1 and ERK2 cascade; positive regulation of adenosine receptor signaling pathway; regulation of amyloid precursor protein biosynthetic process; positive regulation of glutamate receptor signaling pathway; negative regulation of G protein-coupled receptor internalization; positive regulation of protein localization to membrane	metal ion binding; calcium ion binding; protein binding; A2A adenosine receptor binding; type 5 metabotropic glutamate receptor binding	cytoplasm; membrane; plasma membrane; cell projection; dendrite; axon
SPECC1	8.79559e-14	-0.246797	0.28	0.424	3.21927e-09	actin cytoskeleton organization	protein binding	nucleus; membrane; microtubule organizing center; filamentous actin
SAMD12	9.38627e-14	-0.158117	0.084	0.185	3.43547e-09		protein binding
RAMP2	9.55927e-14	-0.185917	0.14	0.262	3.49879e-09	intracellular protein transport; regulation of G protein-coupled receptor signaling pathway; protein transport; G protein-coupled receptor signaling pathway; response to hypoxia; sprouting angiogenesis; heart development; female pregnancy; regulation of blood pressure; positive regulation of gene expression; receptor internalization; response to estradiol; response to progesterone; cellular respo…	coreceptor activity; obsolete protein transporter activity; protein binding; amylin receptor activity; adrenomedullin receptor activity; adrenomedullin binding	cell; membrane; integral component of membrane; cytoplasm; plasma membrane; cell surface; receptor complex; lysosome; integral component of plasma membrane; clathrin-coated pit; amylin receptor complex 2; adrenomedullin receptor complex
GLRA2	9.59738e-14	-0.151623	0.038	0.113	3.51274e-09	ion transport; chloride transport; neuropeptide signaling pathway; ion transmembrane transport; signal transduction; excitatory postsynaptic potential; regulation of postsynaptic membrane potential; cellular response to amino acid stimulus; chemical synaptic transmission; regulation of membrane potential; nervous system process; chloride transmembrane transport; response to amino acid; synaptic t…	metal ion binding; ion channel activity; transmembrane signaling receptor activity; chloride channel activity; extracellular ligand-gated ion channel activity; glycine binding; extracellularly glycine-gated chloride channel activity; transmitter-gated ion channel activity; glycine-gated chloride ion channel activity; transmitter-gated ion channel activity involved in regulation of postsynaptic me…	membrane; integral component of membrane; integral component of plasma membrane; plasma membrane; cell projection; cell junction; synapse; postsynaptic membrane; chloride channel complex; neuron projection; glycinergic synapse
PPP3CA	9.61522e-14	-0.297659	0.408	0.547	3.51927e-09	positive regulation of transcription by RNA polymerase II; positive regulation of cell migration; Fc-epsilon receptor signaling pathway; dephosphorylation; protein dephosphorylation; T cell activation; cellular response to drug; skeletal muscle tissue regeneration; Wnt signaling pathway, calcium modulating pathway; response to calcium ion; calcineurin-NFAT signaling cascade; calcineurin-mediated …	metal ion binding; hydrolase activity; phosphoprotein phosphatase activity; protein binding; calcium ion binding; calmodulin binding; enzyme binding; drug binding; protein serine/threonine phosphatase activity; cyclosporin A binding; protein dimerization activity; calmodulin-dependent protein phosphatase activity; calcium-dependent protein serine/threonine phosphatase activity; protein heterodime…	cytoplasm; membrane; cytosol; nucleoplasm; plasma membrane; cell projection; sarcolemma; dendritic spine; Z disc; cytoplasmic side of plasma membrane; calcineurin complex; postsynapse; nucleus; mitochondrion; slit diaphragm; synapse; Schaffer collateral - CA1 synapse; glutamatergic synapse
NELL2	1.05097e-13	-0.286646	0.206	0.334	3.84665e-09	neuron cellular homeostasis	calcium ion binding; protein binding; heparin binding; protein kinase C binding	extracellular region; cytoplasm
DHX36	1.07269e-13	-0.228818	0.884	0.926	3.92616e-09	DNA duplex unwinding; multicellular organism development; cell differentiation; immune system process; innate immune response; spermatogenesis; defense response to virus; positive regulation of transcription by RNA polymerase II; positive regulation of gene expression; 3'-UTR-mediated mRNA destabilization; regulation of translation; positive regulation of nuclear-transcribed mRNA catabolic proces…	nucleic acid binding; RNA binding; metal ion binding; nucleotide binding; ATP binding; hydrolase activity; DNA binding; helicase activity; magnesium ion binding; DNA helicase activity; RNA helicase activity; protein binding; transcription regulatory region DNA binding; mRNA 3'-UTR binding; RNA polymerase II proximal promoter sequence-specific DNA binding; mRNA 5'-UTR binding; telomerase RNA bindi…	nucleus; cytoplasm; nuclear speck; cytosol; mitochondrion; chromosome; cell projection; dendrite; chromosome, telomeric region; axon; perikaryon; extracellular exosome; cytoplasmic stress granule; membrane; integral component of membrane
AUXG01000058.1	1.10485e-13	0.616097	0.735	0.667	4.04387e-09
DDX24	1.12141e-13	-0.222622	0.908	0.957	4.10449e-09	RNA metabolic process	nucleic acid binding; RNA binding; nucleotide binding; ATP binding; hydrolase activity; helicase activity; RNA helicase activity	membrane; nucleolus
ATP1B1	1.24541e-13	-0.273062	0.812	0.907	4.55834e-09	protein stabilization; cell adhesion; ion transport; potassium ion transport; sodium ion transport; leukocyte migration; establishment or maintenance of transmembrane electrochemical gradient; potassium ion import across plasma membrane; ion transmembrane transport; response to hypoxia; cellular calcium ion homeostasis; regulation of gene expression; regulation of cardiac muscle contraction by ca…	protein binding; sodium:potassium-exchanging ATPase activity; protein C-terminus binding; protein kinase binding; ATPase binding; ATP binding; ATPase activity; MHC class II protein complex binding; potassium ion binding; sodium ion binding; drug binding; ATPase activator activity	membrane; integral component of membrane; plasma membrane; extracellular exosome; sarcolemma; sodium:potassium-exchanging ATPase complex; caveola; intercalated disc; basolateral plasma membrane; apical plasma membrane; extracellular vesicle
TUBB	1.24902e-13	0.276107	0.982	0.985	4.57153e-09	microtubule-based process; microtubule cytoskeleton organization; mitotic cell cycle; G2/M transition of mitotic cell cycle; regulation of G2/M transition of mitotic cell cycle; ciliary basal body-plasma membrane docking; neutrophil degranulation; cellular process; cytoskeleton-dependent intracellular transport; natural killer cell mediated cytotoxicity; regulation of synapse organization; spindl…	nucleotide binding; GTPase activity; GTP binding; protein binding; structural constituent of cytoskeleton; ubiquitin protein ligase binding; MHC class I protein binding; structural molecule activity; protein domain specific binding; GTPase activating protein binding; protein-containing complex binding	nucleus; cytoplasm; cytoskeleton; microtubule; extracellular region; extracellular exosome; azurophil granule lumen; cytoplasmic ribonucleoprotein granule; nuclear envelope lumen; protein-containing complex; cell body; membrane raft
TMEM59L	1.26925e-13	-0.243923	0.469	0.615	4.6456e-09			membrane; integral component of membrane; Golgi apparatus; Golgi membrane
TOMM7	1.32911e-13	-0.271397	0.91	0.952	4.86468e-09	protein transport; protein import into mitochondrial matrix; positive regulation of protein targeting to mitochondrion; macroautophagy; regulation of protein stability; positive regulation of mitophagy in response to mitochondrial depolarization; protein targeting to mitochondrion	protein binding; protein transmembrane transporter activity	membrane; integral component of membrane; mitochondrion; mitochondrial outer membrane; mitochondrial outer membrane translocase complex
FOXN3	1.39562e-13	-0.233071	0.398	0.549	5.10812e-09	regulation of transcription, DNA-templated; cell cycle; craniofacial suture morphogenesis; regulation of transcription by RNA polymerase II; negative regulation of transcription, DNA-templated; mitotic G2 DNA damage checkpoint	DNA binding; DNA-binding transcription factor activity; sequence-specific DNA binding; protein binding; DNA-binding transcription factor activity, RNA polymerase II-specific; protein C-terminus binding	nucleus; nuclear chromatin
SLC17A7	1.47692e-13	-0.111658	0.031	0.101	5.40569e-09	transmembrane transport; ion transport; sodium ion transport; sodium ion transmembrane transport; chloride transmembrane transport; glutamate secretion; L-glutamate transmembrane transport; synaptic transmission, glutamatergic; neurotransmitter transport; regulation of synapse structure or activity; phosphate ion transport; sodium-dependent phosphate transport; neurotransmitter loading into synap…	symporter activity; L-glutamate transmembrane transporter activity; sodium-dependent phosphate transmembrane transporter activity; neurotransmitter transmembrane transporter activity; inorganic phosphate transmembrane transporter activity; extracellularly glutamate-gated chloride channel activity; sodium:inorganic phosphate symporter activity	membrane; integral component of membrane; integral component of plasma membrane; cell junction; cytoplasmic vesicle; synapse; plasma membrane; postsynapse; neuron projection; synaptic vesicle membrane; integral component of synaptic vesicle membrane; clathrin-sculpted glutamate transport vesicle membrane; excitatory synapse; synaptic vesicle; intracellular organelle; cerebellar mossy fiber; presy…
CALY	1.50009e-13	-0.246279	0.076	0.17	5.49048e-09	clathrin coat assembly; dopamine receptor signaling pathway; endocytosis; endosomal transport; positive regulation of endocytosis; postsynaptic neurotransmitter receptor internalization	protein binding; clathrin light chain binding; protein-containing complex binding	membrane; integral component of membrane; plasma membrane; cytoplasmic vesicle; cytoplasmic vesicle membrane; integral component of plasma membrane; endosome; postsynaptic endocytic zone; glutamatergic synapse
FOXP1	1.56553e-13	0.37952	0.344	0.218	5.73e-09	negative regulation of gene expression; positive regulation of B cell receptor signaling pathway; cellular response to DNA damage stimulus; regulation of transcription, DNA-templated; regulation of transcription by RNA polymerase II; response to lipopolysaccharide; macrophage activation; negative regulation of transcription, DNA-templated; positive regulation of endothelial cell migration; endoth…	metal ion binding; DNA binding; DNA-binding transcription factor activity; sequence-specific DNA binding; protein binding; identical protein binding; DNA-binding transcription factor activity, RNA polymerase II-specific; protein self-association; androgen receptor binding	nucleus; nucleoplasm; nuclear chromatin
ADGRB3	1.62591e-13	-0.221864	0.183	0.312	5.951e-09	G protein-coupled receptor signaling pathway; positive regulation of GTPase activity; signal transduction; cell surface receptor signaling pathway; negative regulation of angiogenesis; myoblast fusion; adenylate cyclase-activating G protein-coupled receptor signaling pathway; neuron remodeling; regulation of dendrite morphogenesis; positive regulation of synapse assembly; motor learning; maintena…	G protein-coupled receptor activity; protein binding; transmembrane signaling receptor activity; GTPase activator activity	membrane; integral component of membrane; plasma membrane; integral component of plasma membrane; postsynapse; synaptic cleft
UNCX	1.75506e-13	-0.148703	0.041	0.118	6.4237e-09	regulation of transcription, DNA-templated; multicellular organism development; cell differentiation; regulation of transcription by RNA polymerase II; nervous system development; cartilage condensation; pattern specification process; regulation of gene expression; dorsal spinal cord development; olfactory bulb interneuron differentiation; common myeloid progenitor cell proliferation; regulation …	DNA binding; sequence-specific DNA binding; DNA-binding transcription factor activity, RNA polymerase II-specific	nucleus; nuclear chromatin
DLX2	1.91051e-13	0.400094	0.52	0.375	6.99266e-09	regulation of transcription, DNA-templated; multicellular organism development; cell differentiation; regulation of transcription by RNA polymerase II; positive regulation of transcription by RNA polymerase II; negative regulation of transcription by RNA polymerase II; positive regulation of cell differentiation; brain development; negative regulation of photoreceptor cell differentiation; positi…	DNA binding; sequence-specific DNA binding; protein binding; DNA-binding transcription factor activity; RNA polymerase II proximal promoter sequence-specific DNA binding; DNA-binding transcription factor activity, RNA polymerase II-specific; RNA polymerase II regulatory region sequence-specific DNA binding; DNA-binding transcription activator activity, RNA polymerase II-specific; chromatin bindin…	nucleus; nuclear chromatin
PTGES3	1.94678e-13	-0.228983	0.909	0.942	7.12541e-09	lipid metabolic process; fatty acid metabolic process; fatty acid biosynthetic process; regulation of cellular response to heat; xenobiotic metabolic process; telomere maintenance; signal transduction; positive regulation of phosphorylation; prostaglandin biosynthetic process; prostaglandin metabolic process; cyclooxygenase pathway; positive regulation of telomerase activity; telomere maintenance…	isomerase activity; protein binding; Hsp90 protein binding; unfolded protein binding; prostaglandin-E synthase activity; telomerase activity; chaperone binding; DNA polymerase binding	nucleus; cytoplasm; cytosol; nucleoplasm; chromosome, telomeric region; protein-containing complex; telomerase holoenzyme complex; chaperone complex
CDK2AP1	2.06671e-13	0.257604	0.314	0.183	7.56437e-09	cell cycle; positive regulation of protein phosphorylation; DNA-dependent DNA replication	protein binding; DNA polymerase binding	nucleus; cytosol; nucleoplasm; perinuclear region of cytoplasm
CKLF	2.37159e-13	-0.175121	0.076	0.171	8.68025e-09	signal transduction; chemotaxis; neutrophil chemotaxis; cell population proliferation; macrophage chemotaxis; lymphocyte chemotaxis; secretion by cell; leukocyte chemotaxis	cytokine activity; chemokine activity	membrane; integral component of membrane; extracellular space; extracellular region
PHLDA1	2.68389e-13	0.375281	0.317	0.193	9.82332e-09	apoptotic process; G2/M transition of mitotic cell cycle; positive regulation of apoptotic process; FasL biosynthetic process	protein binding	nucleus; nucleolus; cytoplasm; cytoplasmic vesicle; cytosol
SRI	2.75639e-13	0.301629	0.611	0.495	1.00887e-08	negative regulation of heart rate; regulation of release of sequestered calcium ion into cytosol by sarcoplasmic reticulum; signal transduction; muscle organ development; regulation of cell communication by electrical coupling; negative regulation of ryanodine-sensitive calcium-release channel activity; heart development; regulation of high voltage-gated calcium channel activity; regulation of he…	metal ion binding; calcium ion binding; protein binding; protein heterodimerization activity; ion channel binding; signaling receptor binding; protease binding; calcium channel regulator activity; repressing transcription factor binding	cytoplasm; membrane; cytosol; nucleoplasm; extracellular exosome; sarcoplasmic reticulum; endoplasmic reticulum membrane; sarcoplasmic reticulum membrane; Z disc; T-tubule; chromaffin granule membrane; mitochondrion; smooth endoplasmic reticulum; plasma membrane; axon; vesicle; axon terminus; dendritic spine neck
TOX2	2.85335e-13	-0.126365	0.037	0.111	1.04436e-08	positive regulation of transcription by RNA polymerase II	DNA binding; DNA-binding transcription factor activity, RNA polymerase II-specific; RNA polymerase II proximal promoter sequence-specific DNA binding; DNA-binding transcription activator activity, RNA polymerase II-specific	nucleus; nucleoplasm
RPL37	2.89039e-13	0.21737	0.998	0.994	1.05791e-08	translation; viral transcription; translational initiation; nuclear-transcribed mRNA catabolic process, nonsense-mediated decay; SRP-dependent cotranslational protein targeting to membrane	RNA binding; metal ion binding; structural constituent of ribosome; rRNA binding	ribosome; cytosolic large ribosomal subunit; cytosol; intracellular
SORBS2	3.10724e-13	-0.234411	0.34	0.49	1.13728e-08	cell growth involved in cardiac muscle cell development; actin filament organization; Notch signaling pathway	nucleic acid binding; RNA binding; protein binding; structural constituent of cytoskeleton; structural constituent of muscle; cytoskeletal adaptor activity	nucleus; cytoplasm; membrane; nucleoplasm; plasma membrane; cell projection; perinuclear region of cytoplasm; cell junction; focal adhesion; lamellipodium; apical plasma membrane; Z disc; actin cytoskeleton
SP8	3.67053e-13	0.400742	0.328	0.202	1.34345e-08	regulation of transcription by RNA polymerase II; dorsal/ventral pattern formation; proximal/distal pattern formation; embryonic limb morphogenesis	nucleic acid binding; metal ion binding; DNA binding; DNA-binding transcription factor activity, RNA polymerase II-specific	nucleus; nuclear chromatin
ATP1A3	3.85303e-13	-0.260767	0.43	0.567	1.41025e-08	potassium ion transport; potassium ion transmembrane transport; cellular response to amyloid-beta; ion transport; sodium ion transport; establishment or maintenance of transmembrane electrochemical gradient; potassium ion import across plasma membrane; ion transmembrane transport; regulation of cardiac conduction; neuron projection maintenance; cellular sodium ion homeostasis; cellular potassium …	nucleotide binding; ATP binding; potassium transmembrane transporter activity, phosphorylative mechanism; metal ion binding; amyloid-beta binding; chaperone binding; sodium:potassium-exchanging ATPase activity; steroid hormone binding; ion antiporter activity involved in regulation of presynaptic membrane potential	membrane; integral component of membrane; neuronal cell body; endoplasmic reticulum; Golgi apparatus; plasma membrane; synapse; sodium:potassium-exchanging ATPase complex; extracellular vesicle; axon; neuronal cell body membrane
DDX5	4.04354e-13	0.227899	0.985	0.982	1.47998e-08	BMP signaling pathway; mRNA processing; RNA splicing; rhythmic process; mRNA splicing, via spliceosome; nuclear-transcribed mRNA catabolic process; negative regulation of transcription by RNA polymerase II; regulation of transcription by RNA polymerase II; regulation of alternative mRNA splicing, via spliceosome; androgen receptor signaling pathway; intracellular estrogen receptor signaling pathw…	nucleic acid binding; RNA binding; nucleotide binding; ATP binding; hydrolase activity; protein binding; helicase activity; RNA helicase activity; ribonucleoprotein complex binding; R-SMAD binding; mRNA 3'-UTR binding; SMAD binding; androgen receptor binding; promoter-specific chromatin binding; pre-mRNA binding; primary miRNA binding; calmodulin binding; enzyme binding; MH2 domain binding; calci…	nucleus; membrane; spliceosomal complex; catalytic step 2 spliceosome; nucleolus; cytoplasm; nucleoplasm; extracellular exosome; ribonucleoprotein complex
SLC35E1	4.43498e-13	-0.203696	0.187	0.316	1.62325e-08	transmembrane transport	antiporter activity; transmembrane transporter activity	membrane; integral component of membrane; Golgi apparatus
ZNF208	4.5362e-13	0.248943	0.141	0.046	1.66029e-08	regulation of transcription, DNA-templated	nucleic acid binding; metal ion binding; zinc ion binding; DNA binding	intracellular; nucleus
IQSEC1	5.78218e-13	-0.205664	0.17	0.291	2.11634e-08	regulation of ARF protein signal transduction; positive regulation of GTPase activity; actin cytoskeleton organization; positive regulation of keratinocyte migration; positive regulation of adherens junction organization	protein binding; ARF guanyl-nucleotide exchange factor activity; lipid binding; guanyl-nucleotide exchange factor activity	nucleus; cytoplasm; membrane; intracellular membrane-bounded organelle; nucleolus
ELMO1	6.04596e-13	-0.147533	0.095	0.197	2.21288e-08	actin cytoskeleton organization; apoptotic process; cell migration; Fc-gamma receptor signaling pathway involved in phagocytosis; phagocytosis; vascular endothelial growth factor receptor signaling pathway; regulation of defense response to virus by virus; cell motility; phagocytosis, engulfment; Rac protein signal transduction; actin filament-based process	protein binding; SH3 domain binding; guanyl-nucleotide exchange factor activity	cytoplasm; membrane; plasma membrane; cytosol; guanyl-nucleotide exchange factor complex
RAB33A	6.42439e-13	-0.215874	0.309	0.459	2.35139e-08	Rab protein signal transduction; intracellular protein transport; antigen processing and presentation	nucleotide binding; GTPase activity; GTP binding; protein binding	membrane; plasma membrane; Golgi membrane
RPS2	6.43071e-13	0.20065	0.999	1	2.35371e-08	translation; viral transcription; translational initiation; rRNA processing; nuclear-transcribed mRNA catabolic process, nonsense-mediated decay; SRP-dependent cotranslational protein targeting to membrane; positive regulation of ubiquitin-protein transferase activity	RNA binding; structural constituent of ribosome; protein binding; mRNA binding; cadherin binding; enzyme binding; fibroblast growth factor binding	nucleus; membrane; ribosome; small ribosomal subunit; cytosolic small ribosomal subunit; nucleoplasm; focal adhesion; cytosol; extracellular exosome; ribonucleoprotein complex
PDK1	6.86595e-13	-0.231425	0.155	0.275	2.51301e-08	phosphorylation; protein phosphorylation; carbohydrate metabolic process; glucose metabolic process; cell population proliferation; intrinsic apoptotic signaling pathway in response to oxidative stress; regulation of acetyl-CoA biosynthetic process from pyruvate; regulation of glucose metabolic process; hypoxia-inducible factor-1alpha signaling pathway	nucleotide binding; protein kinase activity; ATP binding; kinase activity; transferase activity; protein binding; pyruvate dehydrogenase (acetyl-transferring) kinase activity	mitochondrion; mitochondrial matrix; nucleus; nucleolus; mitochondrial pyruvate dehydrogenase complex
HIST1H1D	6.979e-13	-0.213139	0.065	0.151	2.55438e-08	nucleosome assembly; regulation of transcription, DNA-templated; negative regulation of DNA recombination; nucleosome positioning; chromosome condensation; negative regulation of chromatin silencing; negative regulation of transcription by RNA polymerase II; regulation of transcription by RNA polymerase II; histone H3-K4 trimethylation; histone H3-K27 trimethylation	RNA binding; DNA binding; chromatin DNA binding; double-stranded DNA binding; nucleosomal DNA binding	nucleus; nucleosome; nuclear chromatin; chromosome; nuclear euchromatin
ZNF827	7.63289e-13	0.270951	0.383	0.249	2.79371e-08	regulation of gene expression	nucleic acid binding; metal ion binding; DNA binding; protein binding; RNA polymerase II core promoter sequence-specific DNA binding	nucleus; histone methyltransferase complex
TMEM151B	7.7092e-13	-0.15189	0.131	0.244	2.82164e-08			membrane; integral component of membrane
IER5L	7.93207e-13	-0.295143	0.256	0.388	2.90322e-08
P4HA1	8.32605e-13	-0.220535	0.2	0.332	3.04742e-08	oxidation-reduction process; peptidyl-proline hydroxylation to 4-hydroxy-L-proline; collagen fibril organization	metal ion binding; oxidoreductase activity; iron ion binding; oxidoreductase activity, acting on paired donors, with incorporation or reduction of molecular oxygen; L-ascorbic acid binding; protein binding; dioxygenase activity; identical protein binding; oxidoreductase activity, acting on single donors with incorporation of molecular oxygen, incorporation of two atoms of oxygen; procollagen-prol…	membrane; intracellular membrane-bounded organelle; endoplasmic reticulum; mitochondrion; endoplasmic reticulum lumen; collagen trimer; procollagen-proline 4-dioxygenase complex
ARL6IP1	8.89822e-13	-0.286089	0.683	0.799	3.25684e-08	positive regulation of L-glutamate import across plasma membrane; cotranslational protein targeting to membrane; negative regulation of apoptotic process; apoptotic process; negative regulation of cysteine-type endopeptidase activity involved in apoptotic process; endoplasmic reticulum tubular network formation; endoplasmic reticulum tubular network membrane organization	protein binding; identical protein binding	membrane; integral component of membrane; cytoplasm; endoplasmic reticulum; Sec61 translocon complex; cytosol; endoplasmic reticulum membrane; endomembrane system; integral component of endoplasmic reticulum membrane
HPCAL4	9.06824e-13	-0.201647	0.182	0.309	3.31907e-08	signal transduction; central nervous system development	metal ion binding; calcium ion binding; protein binding; calcium channel regulator activity; protein C-terminus binding; protein domain specific binding	intracellular
EMX2	9.24552e-13	-0.405493	0.132	0.24	3.38395e-08	regulation of transcription, DNA-templated; multicellular organism development; negative regulation of transcription by RNA polymerase II; neuron differentiation; regulation of transcription by RNA polymerase II; central nervous system development; brain development; anterior/posterior pattern specification; regulation of gene expression; dentate gyrus development; cerebral cortex regionalization…	DNA binding; sequence-specific DNA binding; protein binding; RNA polymerase II proximal promoter sequence-specific DNA binding; DNA-binding transcription factor activity, RNA polymerase II-specific; DNA-binding transcription repressor activity, RNA polymerase II-specific; RNA polymerase II intronic transcription regulatory region sequence-specific DNA binding	nucleus; nuclear chromatin
RPS3A	9.76523e-13	0.184596	0.998	1	3.57417e-08	translation; translational initiation; negative regulation of apoptotic process; cell differentiation; viral transcription; nuclear-transcribed mRNA catabolic process, nonsense-mediated decay; SRP-dependent cotranslational protein targeting to membrane	RNA binding; structural constituent of ribosome; protein binding; mRNA 5'-UTR binding	nucleus; cytoplasm; endoplasmic reticulum; nucleolus; cytosol; ribosome; cytosolic small ribosomal subunit; focal adhesion; nucleoplasm; extracellular exosome; ribonucleoprotein complex; intracellular
ATP6V1F	1.0319e-12	-0.225976	0.845	0.904	3.77684e-08	proton transmembrane transport; ion transport; ion transmembrane transport; insulin receptor signaling pathway; transferrin transport; phagosome acidification	proton-transporting ATPase activity, rotational mechanism; protein binding; ATPase activity; proton transmembrane transporter activity; ATPase-coupled ion transmembrane transporter activity	membrane; proton-transporting V-type ATPase, V1 domain; cytosol; extracellular exosome; vacuolar proton-transporting V-type ATPase complex; proton-transporting two-sector ATPase complex
CACNA1D	1.0483e-12	-0.139503	0.074	0.166	3.83689e-08	transmembrane transport; ion transport; regulation of ion transmembrane transport; calcium ion transport; calcium ion transmembrane transport; induction of synaptic vesicle exocytosis by positive regulation of presynaptic cytosolic calcium ion concentration; cardiac conduction; regulation of potassium ion transmembrane transporter activity; regulation of insulin secretion; calcium ion import; car…	ion channel activity; voltage-gated ion channel activity; voltage-gated calcium channel activity; calcium channel activity; metal ion binding; protein binding; high voltage-gated calcium channel activity; voltage-gated calcium channel activity involved SA node cell action potential; ankyrin binding; alpha-actinin binding; voltage-gated calcium channel activity involved in cardiac muscle cell acti…	membrane; integral component of membrane; voltage-gated calcium channel complex; plasma membrane; Z disc; L-type voltage-gated calcium channel complex; cochlear hair cell ribbon synapse; integral component of presynaptic active zone membrane
ADGRL3	1.06488e-12	-0.261457	0.24	0.372	3.89755e-08	G protein-coupled receptor signaling pathway; signal transduction; cell surface receptor signaling pathway; adenylate cyclase-activating G protein-coupled receptor signaling pathway; brain development; neuron migration; synapse assembly; cell-cell adhesion via plasma-membrane adhesion molecules; locomotion involved in locomotory behavior; response to cocaine; synapse organization; positive regula…	metal ion binding; G protein-coupled receptor activity; carbohydrate binding; protein binding; transmembrane signaling receptor activity; calcium ion binding	membrane; integral component of membrane; plasma membrane; cell projection; cell junction; integral component of plasma membrane; axon; cell-cell junction; glutamatergic synapse
SYT5	1.17711e-12	-0.218793	0.209	0.342	4.30834e-08	regulation of calcium ion-dependent exocytosis; vesicle-mediated transport; chemical synaptic transmission; regulation of dopamine secretion; synaptic vesicle exocytosis; calcium-ion regulated exocytosis; synaptic vesicle endocytosis; calcium ion-regulated exocytosis of neurotransmitter; cellular response to calcium ion	metal ion binding; calcium ion binding; calcium-dependent phospholipid binding; SNARE binding; syntaxin binding; clathrin binding; phosphatidylserine binding; phosphatidylinositol-4,5-bisphosphate binding; protein heterodimerization activity	membrane; integral component of membrane; cell junction; cytoplasmic vesicle; synapse; endosome; plasma membrane; recycling endosome membrane; axon; synaptic vesicle membrane; dense core granule; exocytic vesicle; neuron projection; neuronal cell body; perinuclear region of cytoplasm; integral component of neuronal dense core vesicle membrane; proximal neuron projection
EPCAM	1.21287e-12	-0.131347	0.036	0.106	4.43922e-08	leukocyte migration; positive regulation of transcription by RNA polymerase II; stem cell differentiation; positive regulation of cell population proliferation; positive regulation of stem cell proliferation; ureteric bud development; signal transduction involved in regulation of gene expression; negative regulation of apoptotic process; cell-cell adhesion via plasma-membrane adhesion molecules; …	protein binding; protein-containing complex binding; cadherin binding involved in cell-cell adhesion	membrane; integral component of membrane; plasma membrane; cell junction; bicellular tight junction; extracellular exosome; lateral plasma membrane; apical plasma membrane; cell surface; basolateral plasma membrane
RAB3IP	1.26528e-12	-0.212638	0.239	0.377	4.63106e-08	protein transport; ciliary basal body-plasma membrane docking; protein targeting to membrane	guanyl-nucleotide exchange factor activity; protein binding; Rab guanyl-nucleotide exchange factor activity	nucleus; cytoplasm; cytosol; cytoskeleton; cell projection; lamellipodium
KLHDC8B	1.28221e-12	0.229253	0.231	0.117	4.69303e-08	cell division; cell cycle; nuclear chromosome segregation; mitotic nuclear division; mitotic cytokinetic process	protein binding	cytoplasm; cytosol; midbody; intercellular bridge; cellularization cleavage furrow
UBE2R2	1.44422e-12	0.292984	0.724	0.641	5.28599e-08	protein ubiquitination; protein K48-linked ubiquitination; protein monoubiquitination	nucleotide binding; ATP binding; transferase activity; protein binding; ubiquitin-protein transferase activity; ubiquitin conjugating enzyme activity	cytosol
RPL27A	1.48078e-12	0.181537	0.995	0.995	5.4198e-08	translation; viral transcription; translational initiation; nuclear-transcribed mRNA catabolic process, nonsense-mediated decay; SRP-dependent cotranslational protein targeting to membrane	RNA binding; structural constituent of ribosome; protein binding	membrane; endoplasmic reticulum; cytosol; ribosome; large ribosomal subunit; cytosolic large ribosomal subunit; intracellular
DLX1	1.49871e-12	0.39484	0.473	0.34	5.48543e-08	regulation of transcription, DNA-templated; multicellular organism development; cell differentiation; regulation of transcription by RNA polymerase II; negative regulation of transcription by RNA polymerase II; positive regulation of transcription by RNA polymerase II; positive regulation of cell differentiation; cellular response to transforming growth factor beta stimulus; negative regulation o…	DNA binding; sequence-specific DNA binding; DNA-binding transcription factor activity; protein binding; RNA polymerase II proximal promoter sequence-specific DNA binding; DNA-binding transcription factor activity, RNA polymerase II-specific; RNA polymerase II regulatory region sequence-specific DNA binding; chromatin binding	nucleus; nuclear chromatin
CADM3	1.50902e-12	-0.206486	0.19	0.314	5.52316e-08	cell adhesion; adherens junction organization; homophilic cell adhesion via plasma membrane adhesion molecules; heterophilic cell-cell adhesion via plasma membrane cell adhesion molecules; protein localization	protein homodimerization activity	membrane; integral component of membrane; plasma membrane; cell junction; cell-cell junction; parallel fiber to Purkinje cell synapse; integral component of presynaptic membrane
SHTN1	1.68227e-12	-0.288829	0.483	0.612	6.15726e-08	multicellular organism development; axonogenesis; substrate-dependent cell migration, cell extension; Ras protein signal transduction; Cdc42 protein signal transduction; netrin-activated signaling pathway; positive regulation of axon extension; neuron projection morphogenesis; cytoplasmic actin-based contraction involved in cell motility; endoplasmic reticulum polarization; actin filament bundle …	protein binding; cadherin binding; actin filament binding; kinesin binding	cytoplasm; cytoskeleton; cell projection; perinuclear region of cytoplasm; axon; microtubule associated complex; microtubule cytoskeleton; lamellipodium; filopodium; growth cone; cell leading edge; perikaryon; axonal growth cone; microtubule
TMSB4X	1.76238e-12	0.271405	0.996	0.998	6.45047e-08	actin filament organization; regulation of cell migration; sequestering of actin monomers; platelet degranulation; positive regulation of blood vessel endothelial cell migration; positive regulation of ATP biosynthetic process; tumor necrosis factor-mediated signaling pathway; cytoplasmic sequestering of NF-kappaB; negative regulation of NF-kappaB transcription factor activity; regulation of infl…	RNA binding; actin binding; protein binding; actin monomer binding; enzyme binding	cytoplasm; cytoskeleton; extracellular region; cytosol; platelet alpha granule lumen; nucleus
NDRG2	1.86686e-12	-0.128002	0.083	0.178	6.83289e-08	multicellular organism development; Wnt signaling pathway; cell differentiation; signal transduction; nervous system development; substantia nigra development; negative regulation of cytokine production; regulation of vascular endothelial growth factor production; negative regulation of smooth muscle cell proliferation; negative regulation of ERK1 and ERK2 cascade; regulation of platelet-derived …	protein binding	cytoplasm; cytosol; cell projection; perinuclear region of cytoplasm; growth cone; extracellular exosome; Golgi apparatus; nucleus; membrane; integral component of membrane
INSM1	1.91649e-12	0.276754	0.366	0.229	7.01453e-08	cell cycle; multicellular organism development; cell differentiation; nervous system development; neuron differentiation; negative regulation of transcription by RNA polymerase II; regulation of protein complex assembly; negative regulation of cell population proliferation; positive regulation of neural precursor cell proliferation; positive regulation of cell differentiation; negative regulation…	nucleic acid binding; metal ion binding; DNA binding; DNA-binding transcription factor activity; chromatin DNA binding; DNA-binding transcription factor activity, RNA polymerase II-specific; RNA polymerase II proximal promoter sequence-specific DNA binding; DNA-binding transcription repressor activity, RNA polymerase II-specific; cyclin binding; histone deacetylase binding	nucleus; nucleoplasm; transcriptional repressor complex
RNF152	1.93383e-12	-0.148399	0.086	0.181	7.078e-08	protein ubiquitination; apoptotic process; protein polyubiquitination; positive regulation of autophagy; protein K48-linked ubiquitination; negative regulation of TORC1 signaling; cellular response to amino acid starvation; protein K63-linked ubiquitination	metal ion binding; transferase activity; ubiquitin-protein transferase activity; ubiquitin protein ligase activity; small GTPase binding	membrane; integral component of membrane; lysosomal membrane; lysosome; integral component of organelle membrane
CTDSPL2	1.97015e-12	-0.215067	0.286	0.428	7.21095e-08	protein dephosphorylation; negative regulation of BMP signaling pathway; positive regulation of protein export from nucleus	hydrolase activity; phosphoprotein phosphatase activity; protein binding; phosphatase activity	nucleoplasm; nucleus
CCDC144NL-AS1	1.99928e-12	-0.262779	0.286	0.416	7.31756e-08
NPB	2.12149e-12	-0.135598	0.041	0.113	7.76488e-08	neuropeptide signaling pathway; G protein-coupled receptor signaling pathway	G protein-coupled receptor binding; protein binding	extracellular region
ECHS1	2.17359e-12	0.286915	0.551	0.433	7.95556e-08	lipid metabolic process; fatty acid metabolic process; fatty acid beta-oxidation	catalytic activity; lyase activity; protein binding; enoyl-CoA hydratase activity; isomerase activity	mitochondrion; mitochondrial matrix
ARPP21	2.19888e-12	-0.28466	0.115	0.22	8.04813e-08	cellular response to heat	nucleic acid binding; calmodulin binding	cytoplasm
ASXL3	2.29579e-12	-0.24433	0.366	0.507	8.40282e-08	regulation of transcription, DNA-templated; transcription, DNA-templated; animal organ morphogenesis; positive regulation of transcription by RNA polymerase II	metal ion binding; DNA binding; chromatin binding; peroxisome proliferator activated receptor binding	nucleus; nuclear chromatin; PR-DUB complex
KHDRBS3	2.33007e-12	-0.252568	0.442	0.592	8.5283e-08	mRNA processing; protein complex oligomerization; regulation of mRNA splicing, via spliceosome	nucleic acid binding; RNA binding; protein binding; identical protein binding; SH3 domain binding; protein domain specific binding	nucleus; nucleoplasm
ZNF682	2.35859e-12	-0.205757	0.257	0.394	8.63266e-08	regulation of transcription, DNA-templated	nucleic acid binding; metal ion binding; DNA binding	intracellular; nucleus
PIK3R1	2.37485e-12	-0.26635	0.36	0.504	8.69217e-08	positive regulation of glucose import; positive regulation of protein localization to plasma membrane; protein transport; negative regulation of apoptotic process; signal transduction; Fc-epsilon receptor signaling pathway; Fc-gamma receptor signaling pathway involved in phagocytosis; leukocyte migration; T cell receptor signaling pathway; cellular glucose homeostasis; negative regulation of cell…	protein binding; transcription factor binding; phosphatidylinositol 3-kinase regulatory subunit binding; insulin receptor substrate binding; protein heterodimerization activity; phosphatidylinositol 3-kinase regulator activity; 1-phosphatidylinositol-3-kinase regulator activity; protein phosphatase binding; phosphotyrosine residue binding; insulin-like growth factor receptor binding; insulin rece…	nucleus; cytoplasm; membrane; plasma membrane; cis-Golgi network; cytosol; cell-cell junction; protein-containing complex; perinuclear endoplasmic reticulum membrane; phosphatidylinositol 3-kinase complex; phosphatidylinositol 3-kinase complex, class IA
CREG1	2.59903e-12	-0.168201	0.159	0.278	9.5127e-08	negative regulation of nucleic acid-templated transcription; regulation of growth; neutrophil degranulation; multicellular organism development; regulation of transcription by RNA polymerase II; regulation of transcription, DNA-templated	cofactor binding; transcription corepressor activity; transcription factor binding	extracellular region; extracellular space; extracellular exosome; azurophil granule lumen; transcription factor complex
SEC62	2.73505e-12	-0.21137	0.901	0.937	1.00106e-07	protein transport; cotranslational protein targeting to membrane; posttranslational protein targeting to membrane, translocation; posttranslational protein targeting to endoplasmic reticulum membrane	signaling receptor activity	membrane; integral component of membrane; endoplasmic reticulum; endoplasmic reticulum membrane; integral component of endoplasmic reticulum membrane; cytosol; rough endoplasmic reticulum
ATP5F1A	2.73941e-12	0.231439	0.918	0.887	1.00265e-07	lipid metabolic process; proton transmembrane transport; ion transport; ATP synthesis coupled proton transport; ATP metabolic process; ATP biosynthetic process; negative regulation of endothelial cell proliferation; cristae formation; mitochondrial ATP synthesis coupled proton transport; positive regulation of blood vessel endothelial cell migration	RNA binding; nucleotide binding; ATP binding; protein binding; adenyl ribonucleotide binding; proton-transporting ATP synthase activity, rotational mechanism; ATPase activity; MHC class I protein binding; transmembrane transporter activity; ADP binding; angiostatin binding	membrane; mitochondrial inner membrane; mitochondrion; plasma membrane; proton-transporting ATP synthase complex, catalytic core F(1); extracellular exosome; COP9 signalosome; mitochondrial matrix; mitochondrial proton-transporting ATP synthase complex; proton-transporting ATP synthase complex
ANAPC11	2.75701e-12	-0.23643	0.759	0.851	1.00909e-07	protein ubiquitination; cell division; cell cycle; ubiquitin-dependent protein catabolic process; anaphase-promoting complex-dependent catabolic process; regulation of mitotic cell cycle phase transition; protein K11-linked ubiquitination; mitotic cell cycle; positive regulation of mitotic metaphase/anaphase transition	metal ion binding; ubiquitin-protein transferase activity; ubiquitin protein ligase activity; cullin family protein binding; ubiquitin-ubiquitin ligase activity	nucleus; cytoplasm; nucleolus; nucleoplasm; anaphase-promoting complex; cytosol; cullin-RING ubiquitin ligase complex
SYNE1	3.31017e-12	-0.18376	0.24	0.377	1.21156e-07	cytoskeletal anchoring at nuclear membrane; cell differentiation; spermatogenesis; Golgi organization; nucleus organization; nuclear matrix anchoring at nuclear membrane; muscle cell differentiation	actin filament binding; protein binding; actin binding; RNA binding; protein homodimerization activity; enzyme binding; lamin binding	membrane; integral component of membrane; nucleoplasm; nuclear membrane; meiotic nuclear membrane microtubule tethering complex; nuclear envelope; nucleus; cytoplasm; Golgi apparatus; cytoskeleton; postsynaptic membrane; nucleolus; sarcomere; nuclear outer membrane; P-body
LHX5-AS1	3.31261e-12	-0.254745	0.059	0.14	1.21245e-07
TCEAL2	3.71972e-12	-0.250333	0.488	0.652	1.36146e-07		WW domain binding	nucleus
FXYD6	3.72309e-12	-0.24879	0.817	0.885	1.36269e-07	ion transport; regulation of ion transport; regulation of sodium ion transmembrane transporter activity; ion transmembrane transport; regulation of cardiac conduction	protein binding; ion channel regulator activity; sodium channel regulator activity	membrane; integral component of membrane; plasma membrane; glutamatergic synapse; integral component of postsynaptic membrane; integral component of presynaptic membrane
MAGEH1	3.82143e-12	-0.224362	0.487	0.625	1.39868e-07	apoptotic process	protein binding	cytoplasm
GOLGA7B	3.96617e-12	-0.101356	0.047	0.124	1.45166e-07	protein targeting to membrane; peptidyl-L-cysteine S-palmitoylation	protein-cysteine S-palmitoyltransferase activity	membrane; Golgi apparatus; Golgi membrane; palmitoyltransferase complex
C5orf30	4.12139e-12	-0.226576	0.215	0.334	1.50847e-07	protein transport; cilium assembly; cell projection organization; negative regulation of fibroblast migration; negative regulation of cytokine production involved in inflammatory response	protein binding	cytoplasm; cell projection; cilium; ciliary transition zone
RPL13A	4.24611e-12	0.17188	0.998	0.999	1.55412e-07	translation; regulation of translation; negative regulation of translation; cellular response to interferon-gamma; viral transcription; translational initiation; nuclear-transcribed mRNA catabolic process, nonsense-mediated decay; SRP-dependent cotranslational protein targeting to membrane; negative regulation of formation of translation preinitiation complex	RNA binding; structural constituent of ribosome; mRNA binding	nucleus; cytoplasm; membrane; ribosome; large ribosomal subunit; nucleolus; focal adhesion; cytosolic large ribosomal subunit; cytosol; ribonucleoprotein complex; GAIT complex
CELF2	4.36813e-12	-0.266594	0.743	0.837	1.59878e-07	mRNA processing; regulation of alternative mRNA splicing, via spliceosome; RNA processing; mRNA splice site selection; regulation of heart contraction	nucleic acid binding; RNA binding; mRNA binding; pre-mRNA binding	nucleus; cytoplasm; ribonucleoprotein complex
IGFBP5	4.38264e-12	-0.129416	0.039	0.109	1.60409e-07	positive regulation of vascular smooth muscle cell proliferation; positive regulation of vascular associated smooth muscle cell migration; negative regulation of insulin-like growth factor receptor signaling pathway; negative regulation of cell migration; negative regulation of smooth muscle cell proliferation; regulation of cell growth; osteoblast differentiation; female pregnancy; aging; hair f…	protein binding; insulin-like growth factor binding; fibronectin binding; growth factor binding; insulin-like growth factor I binding; insulin-like growth factor II binding	extracellular region; extracellular space; endoplasmic reticulum lumen; insulin-like growth factor binding protein complex; insulin-like growth factor ternary complex
ACADM	4.86882e-12	0.277353	0.319	0.202	1.78204e-07	oxidation-reduction process; lipid metabolic process; fatty acid metabolic process; fatty acid beta-oxidation; regulation of lipid metabolic process; carnitine metabolic process, CoA-linked; fatty acid beta-oxidation using acyl-CoA dehydrogenase; carnitine biosynthetic process; medium-chain fatty acid metabolic process; medium-chain fatty acid catabolic process; liver development; glycogen biosyn…	oxidoreductase activity; flavin adenine dinucleotide binding; oxidoreductase activity, acting on the CH-CH group of donors; acyl-CoA dehydrogenase activity; medium-chain-acyl-CoA dehydrogenase activity; identical protein binding	nucleus; nuclear speck; mitochondrion; mitochondrial matrix; axon; mitochondrial membrane
SPRYD7	4.91058e-12	-0.204072	0.218	0.341	1.79732e-07		protein binding
REEP1	5.18855e-12	-0.23906	0.352	0.49	1.89906e-07	endoplasmic reticulum tubular network organization; protein insertion into membrane; regulation of intracellular transport	microtubule binding; protein binding; olfactory receptor binding	membrane; integral component of membrane; endoplasmic reticulum; mitochondrion; mitochondrial membrane; cytoplasm; endoplasmic reticulum tubular network; endoplasmic reticulum membrane
ZCCHC12	5.20904e-12	-0.212074	0.254	0.388	1.90656e-07	positive regulation of nucleic acid-templated transcription; BMP signaling pathway	nucleic acid binding; zinc ion binding; metal ion binding; protein binding; nuclear receptor transcription coactivator activity	nuclear speck
SELENOM	5.34143e-12	-0.208144	0.138	0.246	1.95502e-07	response to selenium ion; multicellular organism growth; corticosterone secretion; hormone metabolic process; adipose tissue development	protein binding	cytoplasm; endoplasmic reticulum; Golgi apparatus; perinuclear region of cytoplasm
SAMD1	5.4226e-12	-0.228693	0.46	0.592	1.98473e-07		protein binding
DANCR	5.73945e-12	0.28895	0.504	0.372	2.10069e-07
MAP1B	5.77103e-12	0.260206	0.999	0.998	2.11225e-07	nervous system development; microtubule cytoskeleton organization; dendrite development; axonogenesis; cellular process; axon extension; microtubule bundle formation; neuron migration; negative regulation of microtubule depolymerization; synapse assembly; response to wounding; response to mechanical stimulus; response to carbohydrate; response to inorganic substance; peripheral nervous system axo…	microtubule binding; protein binding; tubulin binding; actin binding; structural molecule activity; phospholipid binding; protein-containing complex binding	microtubule; neuronal cell body; cytoplasm; cytosol; cytoskeleton; cell projection; cell junction; synapse; dendritic spine; dendrite; microtubule associated complex; axon; somatodendritic compartment; basal dendrite; photoreceptor outer segment; plasma membrane; postsynaptic density; growth cone; varicosity; perikaryon; perinuclear region of cytoplasm; apical dendrite; hippocampal mossy fiber
MESP1	5.79134e-12	-0.174113	0.099	0.195	2.11969e-07	positive regulation of Notch signaling pathway; positive regulation of transcription by RNA polymerase II; positive regulation of transcription, DNA-templated; multicellular organism development; Notch signaling pathway; mesoderm formation; somitogenesis; negative regulation of transcription, DNA-templated; heart looping; endothelial cell differentiation; cardiac muscle cell differentiation; hear…	transcription regulatory region DNA binding; protein dimerization activity; DNA binding; DNA-binding transcription factor activity; RNA polymerase II proximal promoter sequence-specific DNA binding; DNA-binding transcription factor activity, RNA polymerase II-specific; DNA-binding transcription activator activity, RNA polymerase II-specific; enhancer binding	nucleus; nuclear chromatin
CDK6	6.0882e-12	0.252703	0.196	0.09	2.22834e-07	negative regulation of epithelial cell proliferation; positive regulation of fibroblast proliferation; negative regulation of osteoblast differentiation; protein phosphorylation; phosphorylation; cell division; cell cycle; cell differentiation; regulation of cell population proliferation; negative regulation of cell population proliferation; response to virus; cell cycle arrest; negative regulati…	nucleotide binding; protein kinase activity; protein serine/threonine kinase activity; ATP binding; kinase activity; transferase activity; protein binding; cyclin-dependent protein serine/threonine kinase activity; cyclin binding; FBXO family protein binding	cytoplasm; nucleus; cytosol; nucleoplasm; cytoskeleton; cell projection; centrosome; microtubule organizing center; ruffle; cyclin-dependent protein kinase holoenzyme complex; cyclin D2-CDK6 complex
EFNB2	6.19361e-12	0.542995	0.574	0.482	2.26692e-07	positive regulation of cell population proliferation; positive regulation of cardiac muscle cell differentiation; negative regulation of neuron projection development; cell adhesion; multicellular organism development; cell differentiation; viral entry into host cell; ephrin receptor signaling pathway; nervous system development; axon guidance; viral process; angiogenesis; cell-cell signaling; an…	protein binding; ephrin receptor binding; virus receptor activity; signaling receptor binding	membrane; integral component of membrane; plasma membrane; cell junction; focal adhesion; adherens junction; integral component of plasma membrane; Schaffer collateral - CA1 synapse; glutamatergic synapse; integral component of presynaptic membrane; integral component of postsynaptic density membrane
NRP2	6.20683e-12	-0.457746	0.485	0.599	2.27176e-07	positive regulation of endothelial cell migration; cell adhesion; axon guidance; multicellular organism development; cell differentiation; angiogenesis; nervous system development; viral process; vascular endothelial growth factor signaling pathway; positive regulation of endothelial cell proliferation; vascular endothelial growth factor receptor signaling pathway; outflow tract septum morphogene…	metal ion binding; protein binding; semaphorin receptor activity; vascular endothelial growth factor-activated receptor activity; heparin binding; signaling receptor activity; growth factor binding; cytokine binding	membrane; integral component of membrane; extracellular region; plasma membrane; semaphorin receptor complex; axon; glutamatergic synapse; integral component of postsynaptic membrane
AP1S1	6.49261e-12	-0.231574	0.537	0.662	2.37636e-07	intracellular protein transport; protein transport; vesicle-mediated transport; retrograde transport, endosome to Golgi; response to virus; antigen processing and presentation of exogenous peptide antigen via MHC class II; regulation of defense response to virus by virus; receptor-mediated endocytosis		membrane; Golgi apparatus; cytosol; membrane coat; terminal bouton; intracellular membrane-bounded organelle; cytoplasmic vesicle; cytoplasmic vesicle membrane; clathrin-coated pit; trans-Golgi network membrane; Golgi membrane; lysosomal membrane; AP-1 adaptor complex
DUSP26	6.60537e-12	-0.13424	0.054	0.132	2.41763e-07	protein dephosphorylation; dephosphorylation; peptidyl-tyrosine dephosphorylation; negative regulation of transcription by RNA polymerase II; positive regulation of cell adhesion; negative regulation of ERK1 and ERK2 cascade; negative regulation of protein kinase activity by regulation of protein phosphorylation; positive regulation of peptidyl-serine dephosphorylation	hydrolase activity; phosphoprotein phosphatase activity; protein binding; protein tyrosine phosphatase activity; phosphatase activity; protein tyrosine/serine/threonine phosphatase activity; p53 binding; phosphoserine phosphatase activity; RNA polymerase II activating transcription factor binding	nucleus; cytoplasm; Golgi apparatus; extracellular exosome
SYNE2	7.48119e-12	0.261455	0.561	0.423	2.73819e-07	cytoskeletal anchoring at nuclear membrane; positive regulation of cell migration; nuclear migration; centrosome localization; nuclear migration along microfilament; nucleokinesis involved in cell motility in cerebral cortex radial glia guided migration; regulation of cilium assembly	actin binding; actin filament binding; protein binding	nucleus; cytoplasm; membrane; integral component of membrane; mitochondrion; nuclear membrane; intermediate filament cytoskeleton; plasma membrane; cytoskeleton; aggresome; meiotic nuclear membrane microtubule tethering complex; cell junction; nucleoplasm; focal adhesion; nuclear envelope; extracellular exosome; sarcoplasmic reticulum; Z disc; sarcoplasmic reticulum membrane; filopodium membrane;…
BLOC1S1	7.9745e-12	-0.232209	0.489	0.627	2.91875e-07	endosomal transport; anterograde axonal transport; melanosome organization; anterograde synaptic vesicle transport; neuron projection development; lysosome localization; aerobic respiration; peptidyl-lysine acetylation; platelet dense granule organization	protein binding	cytoplasm; membrane; mitochondrion; mitochondrial matrix; lysosomal membrane; extracellular space; axon cytoplasm; cytosol; lysosome; BLOC-1 complex; mitochondrial intermembrane space; BORC complex
RPL9	8.48497e-12	0.154261	0.999	1	3.10558e-07	translation; cytoplasmic translation; viral transcription; translational initiation; nuclear-transcribed mRNA catabolic process, nonsense-mediated decay; SRP-dependent cotranslational protein targeting to membrane	structural constituent of ribosome; protein binding; rRNA binding; RNA binding	nucleus; membrane; ribosome; focal adhesion; cytosolic large ribosomal subunit; cytosol; intracellular; integral component of membrane
ANKS1B	8.60579e-12	-0.276283	0.304	0.435	3.14981e-07	regulation of synaptic plasticity by receptor localization to synapse	ephrin receptor binding; protein binding	nucleus; cytoplasm; membrane; intracellular membrane-bounded organelle; cytosol; plasma membrane; cell projection; cell junction; synapse; postsynaptic membrane; postsynaptic density; dendritic spine; Cajal body
CASC15	9.51989e-12	0.314961	0.259	0.144	3.48437e-07
RAD23A	9.76304e-12	-0.241173	0.436	0.56	3.57337e-07	nucleotide-excision repair; proteasome-mediated ubiquitin-dependent protein catabolic process; DNA repair; cellular response to DNA damage stimulus; protein deubiquitination; viral process; positive regulation of cell cycle; positive regulation of viral genome replication; protein destabilization; regulation of proteasomal ubiquitin-dependent protein catabolic process; positive regulation of prot…	damaged DNA binding; protein binding; ubiquitin binding; proteasome binding; ubiquitin-specific protease binding; kinase binding; single-stranded DNA binding; polyubiquitin modification-dependent protein binding	nucleus; intracellular membrane-bounded organelle; cytosol; nucleoplasm; proteasome complex; microtubule organizing center; protein-containing complex; cytoplasm
RBFOX2	9.90337e-12	-0.232545	0.854	0.907	3.62473e-07	mRNA processing; RNA splicing; regulation of RNA splicing; regulation of alternative mRNA splicing, via spliceosome; nervous system development; regulation of cell population proliferation; negative regulation of transcription, DNA-templated; intracellular estrogen receptor signaling pathway; fibroblast growth factor receptor signaling pathway; RNA metabolic process; regulation of definitive eryt…	nucleic acid binding; RNA binding; protein binding; mRNA binding; transcription corepressor activity; transcription factor binding	nucleus; cytoplasm; cytosol; nucleoplasm
MYC	1.08317e-11	0.276188	0.157	0.065	3.96451e-07	regulation of transcription, DNA-templated; positive regulation of translation; positive regulation of transcription, DNA-templated; negative regulation of apoptotic process; cellular response to DNA damage stimulus; cellular iron ion homeostasis; negative regulation of transcription by RNA polymerase II; positive regulation of transcription by RNA polymerase II; oxygen transport; protein deubiqu…	DNA-binding transcription factor activity; mRNA binding; protein binding; eukaryotic initiation factor eIF2 binding; protein dimerization activity; DNA binding; DNA-binding transcription activator activity, RNA polymerase II-specific; RNA polymerase II proximal promoter sequence-specific DNA binding; DNA-binding transcription factor activity, RNA polymerase II-specific; transcription factor bindi…	nucleus; nucleoplasm; membrane; integral component of membrane; nuclear envelope; rough endoplasmic reticulum; nucleoplasmic reticulum; nucleolus; nuclear chromatin; protein-containing complex; mitochondrion
BRINP3	1.14618e-11	-0.199189	0.039	0.106	4.19512e-07	cell cycle; positive regulation of neuron differentiation; negative regulation of mitotic cell cycle; cell cycle arrest; cellular response to retinoic acid; nervous system development; negative regulation of cell cycle		mitochondrion; extracellular region; endoplasmic reticulum; neuronal cell body; dendrite
HIST2H2AC	1.17326e-11	-0.129904	0.07	0.155	4.29426e-07	chromatin organization	DNA binding; protein heterodimerization activity	nucleus; nucleosome; chromosome; nuclear chromatin; extracellular exosome
NDFIP1	1.24811e-11	-0.236881	0.783	0.853	4.5682e-07	metal ion transport; vacuolar transport; cellular iron ion homeostasis; ubiquitin-dependent protein catabolic process; positive regulation of protein ubiquitination; positive regulation of I-kappaB kinase/NF-kappaB signaling; negative regulation of gene expression; negative regulation of transporter activity; negative regulation of protein transport	protein binding; WW domain binding	membrane; integral component of membrane; Golgi apparatus; cell projection; extracellular region; Golgi membrane; perinuclear region of cytoplasm; cell junction; synapse; dendrite; endosome; endoplasmic reticulum; endosome membrane; neuron projection
SRSF3	1.32877e-11	0.294107	0.842	0.794	4.86342e-07	mRNA processing; RNA splicing; mRNA transport; mRNA export from nucleus; regulation of alternative mRNA splicing, via spliceosome; cellular response to leukemia inhibitory factor; RNA export from nucleus; mRNA 3'-end processing; mRNA splicing, via spliceosome; mRNA cis splicing, via spliceosome; regulation of mRNA splicing, via spliceosome	nucleic acid binding; RNA binding; protein binding; phospholipase binding; sequence-specific mRNA binding	nucleus; cytoplasm; nuclear speck; nucleoplasm
SYT16	1.36051e-11	-0.13294	0.079	0.168	4.97961e-07	exocytosis	protein binding; phospholipid binding; protein homodimerization activity; protein heterodimerization activity	membrane; integral component of membrane
CFAP97	1.37716e-11	-0.224199	0.482	0.623	5.04056e-07
RPL7A	1.50916e-11	0.185084	0.996	0.999	5.52368e-07	translation; ribosome biogenesis; viral transcription; translational initiation; nuclear-transcribed mRNA catabolic process, nonsense-mediated decay; maturation of LSU-rRNA; SRP-dependent cotranslational protein targeting to membrane	RNA binding; protein binding; structural constituent of ribosome; cadherin binding	nucleus; cytoplasm; ribosome; nucleolus; focal adhesion; ribonucleoprotein complex; cytosolic large ribosomal subunit; cytosol; membrane; polysomal ribosome
F12	1.58432e-11	-0.130024	0.086	0.178	5.79877e-07	proteolysis; blood coagulation; hemostasis; innate immune response; protein processing; blood coagulation, intrinsic pathway; positive regulation of blood coagulation; fibrinolysis; positive regulation of fibrinolysis; plasma kallikrein-kinin cascade; Factor XII activation; positive regulation of plasminogen activation; protein autoprocessing; zymogen activation; response to misfolded protein	hydrolase activity; calcium ion binding; protein binding; peptidase activity; serine-type endopeptidase activity; serine-type peptidase activity; misfolded protein binding	extracellular space; extracellular region; plasma membrane; extracellular exosome; collagen-containing extracellular matrix; rough endoplasmic reticulum
DLK1	1.62657e-11	0.925344	0.269	0.161	5.95339e-07	negative regulation of Notch signaling pathway; cell differentiation	calcium ion binding	cytoplasm; membrane; integral component of membrane; extracellular space
ST18	1.7103e-11	0.271879	0.228	0.117	6.25987e-07	regulation of transcription, DNA-templated; positive regulation of transcription by RNA polymerase II; negative regulation of cell population proliferation; positive regulation of cysteine-type endopeptidase activity involved in apoptotic signaling pathway; tumor necrosis factor-mediated signaling pathway; interleukin-1-mediated signaling pathway; interleukin-6-mediated signaling pathway	zinc ion binding; metal ion binding; DNA binding; DNA-binding transcription factor activity; RNA polymerase II regulatory region sequence-specific DNA binding; DNA-binding transcription activator activity, RNA polymerase II-specific; DNA-binding transcription factor activity, RNA polymerase II-specific; RNA polymerase II proximal promoter sequence-specific DNA binding; transcription regulator act…	nucleus; nuclear chromatin; protein-DNA complex
DPF1	1.79789e-11	-0.221169	0.32	0.455	6.58047e-07	nervous system development; positive regulation of transcription by RNA polymerase II; histone acetylation; negative regulation of transcription, DNA-templated; apoptotic process	zinc ion binding; metal ion binding; histone binding; histone acetyltransferase activity; nucleic acid binding	nucleus; cytoplasm; nBAF complex; nuclear chromatin; histone acetyltransferase complex
EEF1A2	2.03492e-11	-0.247902	0.68	0.781	7.448e-07	translation; translational elongation; regulation of chaperone-mediated autophagy; response to inorganic substance; positive regulation of apoptotic process; response to electrical stimulus; positive regulation of lipid kinase activity	nucleotide binding; GTPase activity; GTP binding; protein binding; translation elongation factor activity; protein kinase binding; translation factor activity, RNA binding	cytoplasm; cytoplasmic side of lysosomal membrane; eukaryotic translation elongation factor 1 complex; neuronal cell body; synapse
EGR1	2.08593e-11	-0.236116	0.175	0.291	7.6347e-07	positive regulation of gene expression; positive regulation of transcription by RNA polymerase II; positive regulation of tau-protein kinase activity; rhythmic process; circadian regulation of gene expression; positive regulation of transcription, DNA-templated; regulation of transcription by RNA polymerase II; response to hypoxia; type I interferon signaling pathway; response to ischemia; interl…	nucleic acid binding; metal ion binding; zinc ion binding; DNA binding; DNA-binding transcription factor activity; protein binding; sequence-specific DNA binding; DNA-binding transcription factor activity, RNA polymerase II-specific; double-stranded methylated DNA binding; transcription regulatory region sequence-specific DNA binding; RNA polymerase II regulatory region sequence-specific DNA bind…	cytoplasm; nucleus; nucleoplasm; nuclear chromatin
MORF4L1	2.09703e-11	-0.199096	0.946	0.958	7.67534e-07	regulation of transcription, DNA-templated; chromatin organization; DNA repair; DNA recombination; cellular response to DNA damage stimulus; regulation of growth; histone H4 acetylation; double-strand break repair via homologous recombination; histone deacetylation; chromatin silencing; histone H2A acetylation; histone acetylation; cell population proliferation	protein binding; protein N-terminus binding; chromatin binding	nucleus; nuclear speck; NuA4 histone acetyltransferase complex; Sin3 complex; nucleoplasm; histone acetyltransferase complex
C1orf61	2.10053e-11	-0.211196	0.552	0.716	7.68813e-07	positive regulation of transcription by RNA polymerase II		nucleus
LINC00632	2.16418e-11	-0.216755	0.758	0.862	7.92111e-07
HBEGF	2.23977e-11	-0.115713	0.067	0.15	8.1978e-07	positive regulation of protein kinase B signaling; positive regulation of cell migration; MAPK cascade; signal transduction; membrane organization; cell chemotaxis; ERBB2 signaling pathway; regulation of cell motility; muscle organ development; epidermal growth factor receptor signaling pathway; positive regulation of cell population proliferation; negative regulation of epidermal growth factor r…	growth factor activity; heparin binding; epidermal growth factor receptor binding	extracellular space; membrane; integral component of membrane; plasma membrane; extracellular region; cell surface; integral component of plasma membrane; endocytic vesicle membrane; clathrin-coated vesicle membrane; clathrin-coated endocytic vesicle membrane
GRM5	2.46455e-11	-0.176516	0.116	0.218	9.0205e-07	cellular response to amyloid-beta; G protein-coupled receptor signaling pathway; signal transduction; regulation of postsynaptic membrane potential; G protein-coupled glutamate receptor signaling pathway; regulation of synaptic transmission, glutamatergic; chemical synaptic transmission; cognition; learning or memory; modulation of age-related behavioral decline; synapse organization; calcium-med…	G protein-coupled receptor activity; protein binding; glutamate receptor activity; protein tyrosine kinase binding; protein tyrosine kinase activator activity; G protein-coupled receptor activity involved in regulation of postsynaptic membrane potential; neurotransmitter receptor activity involved in regulation of postsynaptic cytosolic calcium ion concentration	membrane; integral component of membrane; plasma membrane; integral component of plasma membrane; postsynaptic density membrane; cytoplasm; neuron projection; Schaffer collateral - CA1 synapse
AC068587.4	2.57951e-11	-0.191763	0.08	0.166	9.44127e-07
PSD	2.60016e-11	-0.183201	0.206	0.331	9.51684e-07	signal transduction; regulation of ARF protein signal transduction; neuron projection development	protein binding; phospholipid binding; ARF guanyl-nucleotide exchange factor activity; guanyl-nucleotide exchange factor activity	membrane; plasma membrane; cell projection; cleavage furrow; ruffle membrane; postsynaptic density; dendritic spine; extrinsic component of postsynaptic endosome membrane; postsynaptic density, intracellular component
PTPRN	2.73767e-11	-0.169937	0.135	0.239	1.00201e-06	peptidyl-tyrosine dephosphorylation; insulin secretion involved in cellular response to glucose stimulus; positive regulation of transcription by RNA polymerase II; response to reactive oxygen species; insulin secretion; luteinization; positive regulation of type B pancreatic cell proliferation; dense core granule maturation; protein dephosphorylation; dephosphorylation; response to glucose; cyto…	protein binding; transcription factor binding; ubiquitin-like protein ligase binding; spectrin binding; phosphatase activity; protein tyrosine phosphatase activity; GTPase binding; hydrolase activity	nucleus; membrane; integral component of membrane; Golgi apparatus; plasma membrane; cell projection; cell junction; cytoplasmic vesicle; synapse; secretory granule; endosome; axon; perikaryon; transport vesicle membrane; neuronal cell body; axon terminus
SBK1	2.83475e-11	-0.245641	0.61	0.727	1.03755e-06	protein phosphorylation; phosphorylation; peptidyl-serine phosphorylation; peptidyl-threonine phosphorylation	ATP binding; protein kinase activity; nucleotide binding; protein serine/threonine kinase activity; kinase activity; transferase activity	cytoplasm
RPS11	2.85498e-11	0.193064	0.995	0.995	1.04495e-06	translation; viral transcription; translational initiation; nuclear-transcribed mRNA catabolic process, nonsense-mediated decay; SRP-dependent cotranslational protein targeting to membrane	RNA binding; structural constituent of ribosome; protein binding; rRNA binding	cytoplasm; membrane; ribosome; cytosolic small ribosomal subunit; nucleolus; focal adhesion; nucleoplasm; cytosol; extracellular exosome; intracellular
RAN	2.88485e-11	0.211732	0.919	0.887	1.05588e-06	protein transport; cell division; nucleocytoplasmic transport; cell cycle; positive regulation of transcription, DNA-templated; intracellular transport of virus; viral process; tRNA export from nucleus; protein import into nucleus; mitotic spindle organization; GTP metabolic process; regulation of cholesterol biosynthetic process; androgen receptor signaling pathway; mitotic cell cycle; positive …	RNA binding; metal ion binding; nucleotide binding; GTPase activity; GTP binding; protein binding; magnesium ion binding; cadherin binding; chromatin binding; GDP binding; protein heterodimerization activity; androgen receptor binding; pre-miRNA binding; nuclear export signal receptor activity	nucleus; cytoplasm; membrane; cytosol; melanosome; nuclear pore; nucleoplasm; nucleolus; midbody; extracellular exosome; centriole; host cell; protein-containing complex; recycling endosome; chromatin; nuclear envelope; RNA nuclear export complex; cell
AKAP5	3.11902e-11	-0.134491	0.076	0.162	1.14159e-06	protein targeting; signal transduction; adenylate cyclase-inhibiting G protein-coupled receptor signaling pathway; chemical synaptic transmission; regulation of protein kinase A signaling; positive regulation of protein localization to plasma membrane; negative regulation of adenylate cyclase activity; positive regulation of adenylate cyclase activity	protein binding; calmodulin binding; GABA receptor binding; protein kinase A regulatory subunit binding; protein kinase A binding; adenylate cyclase binding; SH3 domain binding; protein phosphatase 2B binding; beta-2 adrenergic receptor binding; glutamate receptor binding; scaffold protein binding	membrane; plasma membrane; membrane raft; cytosol; postsynaptic density; cytoplasmic side of plasma membrane; dendritic spine; dendrite membrane; excitatory synapse
MYO1B	3.52889e-11	0.269401	0.253	0.143	1.29161e-06	actin filament organization; actin filament bundle assembly; post-Golgi vesicle-mediated transport; actin filament-based movement	nucleotide binding; ATP binding; motor activity; actin binding; calmodulin binding; cadherin binding; actin filament binding; phosphatidylinositol-4,5-bisphosphate binding; phosphatidylinositol-3,4,5-trisphosphate binding; microfilament motor activity; protein binding; actin-dependent ATPase activity	myosin complex; cytoplasm; plasma membrane; perinuclear region of cytoplasm; early endosome; filopodium; extracellular exosome; cell periphery; endosome membrane; brush border; actin filament; trans-Golgi network membrane; apical part of cell
BTF3	3.59868e-11	0.173933	0.976	0.977	1.31715e-06	protein transport; transcription by RNA polymerase II; in utero embryonic development	RNA binding; protein binding	nucleus; cytoplasm; cytosol; polysomal ribosome; nascent polypeptide-associated complex
SERP2	3.8276e-11	-0.147471	0.057	0.132	1.40094e-06	protein transport; protein glycosylation; endoplasmic reticulum unfolded protein response	protein binding	membrane; integral component of membrane; endoplasmic reticulum; endoplasmic reticulum membrane
GPR27	3.85601e-11	-0.169806	0.208	0.329	1.41134e-06	G protein-coupled receptor signaling pathway; signal transduction; positive regulation of insulin secretion involved in cellular response to glucose stimulus; positive regulation of phospholipase C-activating G protein-coupled receptor signaling pathway	G protein-coupled receptor activity	membrane; integral component of membrane; plasma membrane
FAM49A	3.90146e-11	-0.194653	0.206	0.326	1.42797e-06			intracellular
ANKRD44	4.02468e-11	-0.17397	0.126	0.227	1.47307e-06		protein binding
SOCS2	4.14892e-11	0.212967	0.205	0.103	1.51855e-06	protein ubiquitination; intracellular signal transduction; positive regulation of signal transduction; regulation of phosphatidylinositol 3-kinase activity; regulation of cell growth; negative regulation of receptor signaling pathway via JAK-STAT; regulation of growth; post-translational protein modification; phosphatidylinositol phosphorylation; negative regulation of apoptotic process; receptor…	protein binding; insulin-like growth factor receptor binding; JAK pathway signal transduction adaptor activity; 1-phosphatidylinositol-3-kinase regulator activity; SH3/SH2 adaptor activity; growth hormone receptor binding	cytoplasm; cytosol; phosphatidylinositol 3-kinase complex
PPP2R2B	4.17067e-11	-0.187717	0.396	0.542	1.52651e-06	apoptotic process; regulation of phosphoprotein phosphatase activity; mitotic cell cycle; peptidyl-serine dephosphorylation	protein binding; protein phosphatase regulator activity; protein serine/threonine phosphatase activity	cytoplasm; membrane; mitochondrion; cytoskeleton; mitochondrial outer membrane; protein phosphatase type 2A complex; cytosol
BTG1	4.2845e-11	-0.311471	0.923	0.958	1.56817e-06	negative regulation of cell population proliferation; cell migration; regulation of transcription, DNA-templated; negative regulation of cell growth; positive regulation of angiogenesis; positive regulation of fibroblast apoptotic process; negative regulation of mitotic cell cycle; positive regulation of myoblast differentiation; response to oxidative stress; spermatogenesis; response to peptide …	protein binding; enzyme binding; transcription coregulator activity; kinase binding	nucleus; cytoplasm; nucleoplasm
CLIC1	4.32942e-11	0.332752	0.281	0.17	1.58461e-06	ion transmembrane transport; ion transport; regulation of ion transmembrane transport; signal transduction; chloride transport; chloride transmembrane transport; regulation of cell cycle; platelet aggregation; positive regulation of osteoblast differentiation; regulation of mitochondrial membrane potential	voltage-gated ion channel activity; protein binding; chloride channel activity; cadherin binding	perinuclear region of cytoplasm; nucleus; cytoplasm; membrane; integral component of membrane; extracellular space; plasma membrane; chloride channel complex; extracellular exosome; blood microparticle; nuclear membrane; brush border; nuclear envelope; vesicle; mitochondrion
PCDHB9	4.72734e-11	-0.104506	0.043	0.112	1.73025e-06	cell adhesion; homophilic cell adhesion via plasma membrane adhesion molecules; chemical synaptic transmission; synapse assembly; calcium-dependent cell-cell adhesion via plasma membrane cell adhesion molecules	calcium ion binding	membrane; integral component of membrane; plasma membrane; integral component of plasma membrane
LRP8	5.03035e-11	0.300866	0.284	0.176	1.84116e-06	lipid metabolic process; proteolysis; endocytosis; regulation of apoptotic process; positive regulation of peptidyl-tyrosine phosphorylation; signal transduction; retinoid metabolic process; cytokine-mediated signaling pathway; positive regulation of dendrite development; regulation of innate immune response; positive regulation of protein tyrosine kinase activity; positive regulation of CREB tra…	calcium ion binding; protein binding; transmembrane signaling receptor activity; apolipoprotein binding; low-density lipoprotein particle receptor activity; very-low-density lipoprotein particle receptor activity; cargo receptor activity; reelin receptor activity; high-density lipoprotein particle binding; kinesin binding	membrane; integral component of membrane; plasma membrane; extracellular region; receptor complex; caveola; microtubule associated complex; postsynaptic density; axon; dendrite; neuronal cell body
PITHD1	5.23259e-11	-0.198738	0.485	0.616	1.91518e-06			nucleus
RASGRF1	5.50313e-11	-0.167275	0.098	0.189	2.0142e-06	intracellular signal transduction; small GTPase mediated signal transduction; regulation of Rho protein signal transduction; regulation of Ras protein signal transduction; MAPK cascade; long-term memory; signal transduction; regulation of synaptic plasticity; response to endoplasmic reticulum stress; positive regulation of Ras protein signal transduction; positive regulation of GTPase activity; n…	guanyl-nucleotide exchange factor activity; Rho guanyl-nucleotide exchange factor activity; Ras guanyl-nucleotide exchange factor activity; protein binding; glutamate receptor binding	plasma membrane; neuron projection; cytosol; growth cone; intracellular
MDK	5.56846e-11	0.529577	0.598	0.54	2.03811e-06	multicellular organism development; cell differentiation; nervous system development; positive regulation of neuron migration; negative regulation of canonical Wnt signaling pathway; positive regulation of cell division; positive regulation of cell migration; positive regulation of inflammatory response; cytoskeleton organization; positive regulation of neural precursor cell proliferation; oogene…	growth factor activity; protein binding; heparin binding; chondroitin sulfate binding; heparan sulfate binding	extracellular region; collagen-containing extracellular matrix; cytoplasm; cell projection
ALKBH2	5.59919e-11	-0.137336	0.095	0.188	2.04936e-06	oxidation-reduction process; DNA repair; cellular response to DNA damage stimulus; oxidative demethylation; DNA dealkylation involved in DNA repair; oxidative DNA demethylation; DNA demethylation	metal ion binding; oxidoreductase activity; dioxygenase activity; ferrous iron binding; 1-ethyladenine demethylase activity; DNA-N1-methyladenine dioxygenase activity; cytosine C-5 DNA demethylase activity; 2-oxoglutarate-dependent dioxygenase activity	nucleus; nucleoplasm; microtubule cytoskeleton
PREPL	6.85424e-11	-0.254386	0.505	0.627	2.50872e-06	proteolysis; retrograde transport, endosome to Golgi; Golgi to plasma membrane protein transport; regulation of synaptic vesicle exocytosis	hydrolase activity; peptidase activity; serine-type endopeptidase activity; serine-type peptidase activity; serine-type exopeptidase activity	nucleus; cytoplasm; Golgi apparatus; cytosol; cytoskeleton; trans-Golgi network
ZCRB1	7.08483e-11	-0.224745	0.655	0.76	2.59312e-06	mRNA processing; RNA splicing; mRNA splicing, via spliceosome	nucleic acid binding; RNA binding; zinc ion binding; metal ion binding	nucleus; spliceosomal complex; nucleoplasm; U12-type spliceosomal complex
SPTAN1	7.49043e-11	-0.232535	0.634	0.737	2.74157e-06	actin filament capping; cytoskeleton organization; MAPK cascade; neutrophil degranulation; axon guidance; endoplasmic reticulum to Golgi vesicle-mediated transport	metal ion binding; calcium ion binding; actin binding; protein binding; calmodulin binding; cadherin binding; structural constituent of cytoskeleton	cytoplasm; intracellular membrane-bounded organelle; microtubule cytoskeleton; cytoskeleton; extracellular region; cytosol; extracellular exosome; cell cortex; membrane; specific granule lumen; tertiary granule lumen; extracellular vesicle; spectrin
CDCA7L	8.50729e-11	0.450172	0.276	0.169	3.11375e-06	regulation of transcription, DNA-templated; positive regulation of cell population proliferation; cell division	protein binding	nucleus; cytoplasm; nucleolus; cytosol; fibrillar center; membrane; integral component of membrane
ATP8A1	8.53151e-11	-0.153856	0.111	0.207	3.12262e-06	phospholipid transport; lipid transport; cation transmembrane transport; ion transmembrane transport; neutrophil degranulation; phospholipid translocation; learning; positive regulation of cell migration; positive regulation of phospholipid translocation	ATP binding; magnesium ion binding; ATPase-coupled intramembrane lipid transporter activity; metal ion binding; nucleotide binding; protein binding; ATPase-coupled cation transmembrane transporter activity	integral component of membrane; membrane; intracellular membrane-bounded organelle; endoplasmic reticulum; Golgi apparatus; plasma membrane; cytoplasmic vesicle; extracellular exosome; trans-Golgi network; specific granule membrane; azurophil granule membrane; chromaffin granule membrane
DLX6-AS1	8.66851e-11	0.381784	0.591	0.442	3.17276e-06
MARCKSL1	9.05433e-11	0.172183	0.993	0.994	3.31398e-06	positive regulation of cell population proliferation	actin binding; protein binding; calmodulin binding	cytoplasm; membrane; plasma membrane; cytoskeleton; extracellular exosome
SLC25A5	9.56309e-11	0.273301	0.716	0.649	3.50019e-06	transmembrane transport; chromosome segregation; viral process; positive regulation of cell population proliferation; negative regulation of mitochondrial outer membrane permeabilization involved in apoptotic signaling pathway; regulation of insulin secretion; ADP transport; adenine transport; ATP transport; cellular response to leukemia inhibitory factor	RNA binding; transmembrane transporter activity; protein binding; ubiquitin protein ligase binding; ATP:ADP antiporter activity; adenine transmembrane transporter activity	nucleus; membrane; integral component of membrane; mitochondrion; mitochondrial inner membrane; integral component of plasma membrane; mitochondrial nucleoid; MMXD complex; membrane raft
GNPTAB	9.84048e-11	-0.18266	0.356	0.489	3.60171e-06	lysosome organization; carbohydrate phosphorylation; protein secretion; N-glycan processing to lysosome; secretion of lysosomal enzymes	metal ion binding; transferase activity; calcium ion binding; transferase activity, transferring phosphorus-containing groups; protein binding; UDP-N-acetylglucosamine-lysosomal-enzyme N-acetylglucosaminephosphotransferase activity	membrane; integral component of membrane; Golgi apparatus; Golgi membrane
ESRRG	1.228e-10	-0.29518	0.079	0.159	4.4946e-06	regulation of transcription, DNA-templated; steroid hormone mediated signaling pathway; positive regulation of transcription, DNA-templated; retinoic acid receptor signaling pathway; transcription initiation from RNA polymerase II promoter; positive regulation of cold-induced thermogenesis; positive regulation of transcription by RNA polymerase II	zinc ion binding; metal ion binding; DNA binding; DNA-binding transcription factor activity; sequence-specific DNA binding; protein binding; steroid hormone receptor activity; nuclear receptor activity; steroid binding; DNA-binding transcription factor activity, RNA polymerase II-specific; AF-2 domain binding; RNA polymerase II regulatory region sequence-specific DNA binding; DNA-binding transcri…	nucleus; nuclear chromatin; nucleoplasm
NSF	1.26485e-10	-0.16716	0.337	0.477	4.62947e-06	protein transport; exocytosis; plasma membrane fusion; potassium ion transport; SNARE complex disassembly; retrograde vesicle-mediated transport, Golgi to endoplasmic reticulum; Golgi to plasma membrane protein transport; endoplasmic reticulum to Golgi vesicle-mediated transport; COPII vesicle coating; regulation of exocytosis; Golgi vesicle docking; positive regulation of receptor recycling; int…	metal ion binding; nucleotide binding; ATP binding; hydrolase activity; protein binding; ATPase activity; syntaxin-1 binding; protein kinase binding; syntaxin binding; ATPase activity, coupled; Rab GTPase binding; protein-containing complex binding; PDZ domain binding; SNARE binding; ionotropic glutamate receptor binding	cytoplasm; cytosol; lysosomal membrane; plasma membrane; Golgi membrane; Golgi stack; postsynaptic density; dendritic shaft
NAP1L3	1.29194e-10	-0.227018	0.415	0.552	4.72862e-06	nucleosome assembly		nucleus
ID2	1.3432e-10	-0.304767	0.214	0.326	4.91626e-06	regulation of lipid metabolic process; negative regulation of transcription, DNA-templated; rhythmic process; multicellular organism development; circadian regulation of gene expression; positive regulation of transcription, DNA-templated; neuron differentiation; regulation of cell cycle; positive regulation of gene expression; circadian rhythm; negative regulation of gene expression; negative re…	protein dimerization activity; protein binding; DNA-binding transcription factor activity; DNA-binding transcription factor activity, RNA polymerase II-specific; transcription factor binding; ion channel binding; RNA polymerase II transcription factor binding	cytoplasm; nucleus; protein-containing complex; cytosol
TRIM2	1.39674e-10	-0.207106	0.576	0.705	5.11219e-06	protein ubiquitination; proteasome-mediated ubiquitin-dependent protein catabolic process; protein polyubiquitination; regulation of neuron apoptotic process	zinc ion binding; metal ion binding; transferase activity; protein binding; ubiquitin-protein transferase activity; ubiquitin protein ligase activity	cytoplasm; intracellular
AC005332.4	1.44753e-10	-0.12162	0.098	0.189	5.29809e-06
GAP43	1.64604e-10	-0.213189	0.842	0.937	6.02467e-06	multicellular organism development; regulation of growth; cell differentiation; nervous system development; response to wounding; regulation of filopodium assembly; protein kinase C-activating G protein-coupled receptor signaling pathway; axon choice point recognition; axon regeneration; tissue regeneration; axon guidance; glial cell differentiation; cell fate commitment; regulation of postsynapt…	protein binding; calmodulin binding; phosphatidylserine binding; lysophosphatidic acid binding; phosphatidylinositol phosphate binding	cytoplasm; membrane; plasma membrane; cell projection; cell junction; synapse; dendrite; axon; perikaryon; postsynaptic density; filopodium membrane; growth cone membrane; cell periphery; GABA-ergic synapse
SERPINI1	1.70927e-10	-0.161767	0.093	0.18	6.25611e-06	positive regulation of neuron projection development; negative regulation of endopeptidase activity; negative regulation of peptidase activity; central nervous system development; peripheral nervous system development; regulation of cell adhesion	serine-type endopeptidase inhibitor activity; peptidase inhibitor activity	extracellular space; extracellular region; cytoplasmic vesicle; perikaryon; extracellular exosome; neuronal cell body; cytoplasmic vesicle lumen; secretory granule lumen
PRMT1	1.7524e-10	0.253517	0.766	0.705	6.41397e-06	methylation; protein methylation; positive regulation of erythrocyte differentiation; positive regulation of p38MAPK cascade; DNA damage response, signal transduction by p53 class mediator resulting in cell cycle arrest; protein homooligomerization; positive regulation of cell population proliferation; cell surface receptor signaling pathway; neuron projection development; regulation of megakaryo…	transferase activity; methyltransferase activity; RNA binding; protein binding; histone methyltransferase activity (H4-R3 specific); identical protein binding; enzyme binding; methyl-CpG binding; histone methyltransferase activity; protein-arginine N-methyltransferase activity; mitogen-activated protein kinase p38 binding; S-adenosyl-L-methionine binding; protein methyltransferase activity; prote…	nucleus; cytoplasm; cytosol; nucleoplasm; methylosome
H2AFZ	1.77908e-10	0.208048	0.94	0.938	6.51163e-06	chromatin organization; positive regulation of transcription by RNA polymerase II; cellular response to estradiol stimulus	DNA binding; protein heterodimerization activity; chromatin DNA binding; protein binding; RNA polymerase II distal enhancer sequence-specific DNA binding; RNA polymerase II proximal promoter sequence-specific DNA binding; RNA polymerase II core promoter sequence-specific DNA binding; nucleosomal DNA binding	nucleus; nucleosome; chromosome; nuclear chromatin; extracellular exosome; nuclear euchromatin; nuclear heterochromatin
SYT10	1.78272e-10	0.236682	0.11	0.036	6.52493e-06	exocytosis; regulation of calcium ion-dependent exocytosis; sensory perception of smell; vesicle-mediated transport; chemical synaptic transmission; regulation of dopamine secretion; calcium-ion regulated exocytosis; cellular response to calcium ion; positive regulation of calcium ion-dependent exocytosis	metal ion binding; calcium ion binding; calcium-dependent phospholipid binding; SNARE binding; syntaxin binding; clathrin binding; phosphatidylserine binding; phosphatidylinositol-4,5-bisphosphate binding; identical protein binding; protein homodimerization activity; protein heterodimerization activity	membrane; integral component of membrane; presynapse; cytoplasmic vesicle; plasma membrane; exocytic vesicle; transport vesicle membrane
ATP6V0B	1.83829e-10	-0.231986	0.804	0.86	6.72832e-06	proton transmembrane transport; ion transport; ion transmembrane transport; insulin receptor signaling pathway; regulation of macroautophagy; transferrin transport; phagosome acidification	proton transmembrane transporter activity; transporter activity; proton-transporting ATPase activity, rotational mechanism	membrane; integral component of membrane; proton-transporting V-type ATPase, V0 domain; proton-transporting two-sector ATPase complex, proton-transporting domain; endosome membrane; vacuole; vacuolar membrane; phagocytic vesicle membrane; endosome
HSPA4L	1.86408e-10	-0.254218	0.3	0.414	6.8227e-06	response to unfolded protein; protein folding	nucleotide binding; ATP binding	nucleus; cytoplasm; cytosol
REEP5	1.9429e-10	-0.197352	0.33	0.467	7.11123e-06		protein binding	membrane; integral component of membrane; endoplasmic reticulum; endoplasmic reticulum tubular network
MIR137HG	1.98441e-10	-0.109566	0.045	0.112	7.26312e-06
KIF1A	2.03185e-10	-0.239974	0.666	0.75	7.43676e-06	microtubule-based movement; vesicle-mediated transport; cytoskeleton-dependent intracellular transport; anterograde axonal transport; anterograde neuronal dense core vesicle transport; retrograde neuronal dense core vesicle transport; interkinetic nuclear migration; protein transport along microtubule	nucleotide binding; ATP binding; microtubule motor activity; microtubule binding; identical protein binding; ATPase activity; motor activity; ATP-dependent microtubule motor activity, plus-end-directed; protein binding; protein homodimerization activity	cytoplasm; axon cytoplasm; cytoskeleton; microtubule; neuron projection; axon; dendrite; kinesin complex; cytosol; synaptic vesicle; protein-containing complex; neuronal cell body; presynapse; postsynapse
RGS9	2.2342e-10	-0.105248	0.043	0.108	8.17739e-06	G protein-coupled receptor signaling pathway; intracellular signal transduction; positive regulation of GTPase activity; response to stimulus; visual perception; protein folding; negative regulation of signal transduction; regulation of G protein-coupled receptor signaling pathway; response to amphetamine; dopamine receptor signaling pathway; nervous system development; response to estradiol; pos…	GTPase activity; GTPase activator activity	membrane; plasma membrane; nucleus; cytoplasm; postsynaptic density membrane; glutamatergic synapse
TMTC2	2.28368e-10	0.176365	0.122	0.044	8.35851e-06	protein glycosylation; protein O-linked mannosylation; calcium ion homeostasis	transferase activity; protein binding; mannosyltransferase activity; dolichyl-phosphate-mannose-protein mannosyltransferase activity	membrane; integral component of membrane; endoplasmic reticulum; endoplasmic reticulum membrane
SELENOW	2.44797e-10	-0.203688	0.91	0.941	8.95983e-06	cellular oxidant detoxification; response to selenium ion	antioxidant activity	cytoplasm
OAZ2	2.53901e-10	0.30309	0.583	0.495	9.29303e-06	polyamine metabolic process; negative regulation of catalytic activity; positive regulation of protein catabolic process; regulation of cellular amino acid metabolic process; polyamine biosynthetic process; positive regulation of intracellular protein transport; negative regulation of polyamine transmembrane transport	ornithine decarboxylase inhibitor activity; protein binding	nucleus; cytosol; cytoplasm
IGF2BP3	2.54401e-10	0.271379	0.316	0.209	9.31133e-06	mRNA transport; regulation of mRNA stability; regulation of translation; negative regulation of translation; translation; anatomical structure morphogenesis; regulation of cytokine biosynthetic process	nucleic acid binding; RNA binding; protein binding; mRNA 3'-UTR binding; translation regulator activity; mRNA 5'-UTR binding	cytoplasm; nucleus; cytosol
VSTM2A	2.74064e-10	-0.182452	0.066	0.14	1.0031e-05	cell differentiation; positive regulation of gene expression; positive regulation of brown fat cell differentiation; positive regulation of lipid storage; cellular response to BMP stimulus; positive regulation of white fat cell proliferation	identical protein binding	extracellular region; integral component of membrane
RPL23	2.79164e-10	0.203852	0.995	0.994	1.02177e-05	translation; viral transcription; translational initiation; ribosomal protein import into nucleus; nuclear-transcribed mRNA catabolic process, nonsense-mediated decay; SRP-dependent cotranslational protein targeting to membrane; negative regulation of transcription by RNA polymerase II; positive regulation of cell population proliferation; positive regulation of gene expression; protein-DNA compl…	RNA binding; structural constituent of ribosome; protein binding; large ribosomal subunit rRNA binding; ubiquitin protein ligase binding; transcription coactivator binding; ubiquitin ligase inhibitor activity	membrane; ribosome; focal adhesion; cytosolic large ribosomal subunit; cytosol; extracellular exosome; protein-containing complex; cytoplasm; nucleoplasm; nucleolus; postsynaptic density
DNAJC6	2.81509e-10	-0.138985	0.113	0.207	1.03035e-05	peptidyl-tyrosine dephosphorylation; protein dephosphorylation; membrane organization; clathrin-dependent endocytosis; receptor-mediated endocytosis; synaptic vesicle uncoating; clathrin coat disassembly; regulation of clathrin-dependent endocytosis	hydrolase activity; phosphoprotein phosphatase activity; protein tyrosine phosphatase activity; SH3 domain binding; clathrin binding	presynapse; cytoplasm; intracellular membrane-bounded organelle; cytosol; postsynaptic density; vesicle; synapse
TM2D3	2.81581e-10	-0.187693	0.509	0.647	1.03062e-05			membrane; integral component of membrane
DOC2A	2.86506e-10	-0.112892	0.066	0.143	1.04864e-05	exocytosis; regulation of calcium ion-dependent exocytosis; chemical synaptic transmission; nervous system development; synaptic vesicle exocytosis; spontaneous neurotransmitter secretion	calcium ion binding; calcium-dependent phospholipid binding; protein binding	membrane; nucleus; nucleolus; cell junction; cytoplasmic vesicle; synapse; lysosome; neuron projection; synaptic vesicle membrane; extrinsic component of synaptic vesicle membrane
RPP21	2.98685e-10	-0.223907	0.548	0.677	1.09322e-05	tRNA processing; RNA phosphodiester bond hydrolysis; RNA phosphodiester bond hydrolysis, endonucleolytic; tRNA 5'-leader removal; response to drug	RNA binding; metal ion binding; hydrolase activity; ribonuclease P activity; ribonuclease P RNA binding	nucleus; nucleolus; nucleoplasm; multimeric ribonuclease P complex; nucleolar ribonuclease P complex
KIF21A	3.08345e-10	-0.224998	0.791	0.874	1.12857e-05	microtubule-based movement	nucleotide binding; ATP binding; motor activity; microtubule motor activity; microtubule binding; protein binding; ATPase activity	cytosol; plasma membrane; cytoplasm; cytoskeleton; microtubule; kinesin complex
BRMS1L	3.14846e-10	-0.198634	0.195	0.302	1.15237e-05	negative regulation of transcription by RNA polymerase II; regulation of growth; histone deacetylation	protein binding; histone deacetylase binding; histone deacetylase activity	nucleus; Sin3-type complex
ATP6V0C	3.22214e-10	-0.215321	0.774	0.839	1.17934e-05	proton transmembrane transport; ion transport; positive regulation of Wnt signaling pathway; ion transmembrane transport; viral process; neutrophil degranulation; insulin receptor signaling pathway; regulation of macroautophagy; transferrin transport; phagosome acidification	protein binding; proton transmembrane transporter activity; ubiquitin protein ligase binding; proton-transporting ATPase activity, rotational mechanism; proton-transporting ATP synthase activity, rotational mechanism	membrane; integral component of membrane; lysosomal membrane; proton-transporting V-type ATPase, V0 domain; focal adhesion; plasma membrane; extracellular exosome; endosome membrane; tertiary granule membrane; proton-transporting two-sector ATPase complex, proton-transporting domain; vacuole; vacuolar membrane; phagocytic vesicle membrane; azurophil granule membrane; ficolin-1-rich granule membra…
RPS10	3.27871e-10	-0.21736	0.929	0.964	1.20004e-05	translation; ribosomal small subunit assembly; viral transcription; translational initiation; nuclear-transcribed mRNA catabolic process, nonsense-mediated decay; SRP-dependent cotranslational protein targeting to membrane	RNA binding; structural constituent of ribosome; protein binding	nucleus; cytoplasm; membrane; cytosol; ribosome; cytosolic small ribosomal subunit; nucleolus; focal adhesion; nucleoplasm
NDUFB2	3.48144e-10	-0.218533	0.881	0.911	1.27424e-05	oxidation-reduction process; mitochondrial respiratory chain complex I assembly; mitochondrial electron transport, NADH to ubiquinone	NADH dehydrogenase (ubiquinone) activity	mitochondrial inner membrane; mitochondrial respiratory chain complex I; membrane; mitochondrion; respirasome
PAK1IP1	3.50869e-10	-0.201717	0.268	0.386	1.28422e-05	ribosome biogenesis; cell population proliferation; roof of mouth development; ribosomal large subunit biogenesis; negative regulation of signal transduction; regulation of signal transduction by p53 class mediator	protein binding	nucleus; nucleolus
PFN1	3.55916e-10	0.246667	0.704	0.629	1.30269e-05	actin cytoskeleton organization; protein stabilization; Wnt signaling pathway, planar cell polarity pathway; positive regulation of actin filament polymerization; positive regulation of epithelial cell migration; positive regulation of ATPase activity; negative regulation of stress fiber assembly; negative regulation of actin filament polymerization; regulation of actin filament polymerization; n…	RNA binding; actin binding; protein binding; cadherin binding; actin monomer binding; phosphatidylinositol-4,5-bisphosphate binding; proline-rich region binding; adenyl-nucleotide exchange factor activity; Rho GTPase binding	nucleus; cytoplasm; membrane; cytoskeleton; focal adhesion; cytosol; extracellular exosome; cell cortex; blood microparticle; glutamatergic synapse
CECR2	3.56078e-10	0.212596	0.265	0.156	1.30328e-05	ATP-dependent chromatin remodeling; neural fold formation; neural tube closure; single fertilization; neural tube development; inner ear receptor cell stereocilium organization; cochlea development; chromatin organization; vesicle-mediated transport; cytoskeleton organization; cytoskeleton-dependent cytokinesis; execution phase of apoptosis; apoptotic DNA fragmentation	protein binding	CERF complex; nuclear euchromatin; ISWI-type complex; nucleus
RPL39L	3.59321e-10	-0.141443	0.075	0.152	1.31515e-05	translation; spermatogenesis	structural constituent of ribosome; protein binding	ribosome; cytosolic large ribosomal subunit; intracellular
SDC3	3.6299e-10	-0.186448	0.324	0.447	1.32858e-05	leukocyte migration; cell migration; retinoid metabolic process; glycosaminoglycan biosynthetic process; glycosaminoglycan catabolic process	protein binding; identical protein binding	membrane; integral component of membrane; plasma membrane; cell surface; collagen-containing extracellular matrix; lysosomal lumen; Golgi lumen; microspike
SEC11C	3.63291e-10	-0.207485	0.726	0.818	1.32968e-05	proteolysis; signal peptide processing	hydrolase activity; peptidase activity; serine-type peptidase activity	membrane; integral component of membrane; endoplasmic reticulum; endoplasmic reticulum membrane; organelle membrane; intracellular membrane-bounded organelle; signal peptidase complex
CACNA2D1	3.95587e-10	-0.179985	0.135	0.233	1.44789e-05	cellular response to amyloid-beta; regulation of ventricular cardiac muscle cell membrane repolarization; ion transport; regulation of ion transmembrane transport; calcium ion transport; calcium ion transmembrane transport; cardiac conduction; cardiac muscle cell action potential involved in contraction; regulation of heart rate by cardiac conduction; calcium ion import across plasma membrane; re…	metal ion binding; voltage-gated ion channel activity; calcium channel activity; voltage-gated calcium channel activity; voltage-gated calcium channel activity involved in cardiac muscle cell action potential; voltage-gated calcium channel activity involved in bundle of His cell action potential	membrane; integral component of membrane; plasma membrane; extracellular exosome; voltage-gated calcium channel complex; L-type voltage-gated calcium channel complex; sarcoplasmic reticulum; T-tubule
PLAGL1	4.19024e-10	0.228756	0.188	0.096	1.53367e-05	regulation of transcription by RNA polymerase II; DNA damage response, signal transduction by p53 class mediator resulting in cell cycle arrest; positive regulation of transcription by RNA polymerase II; apoptotic process; cell cycle arrest	nucleic acid binding; metal ion binding; DNA binding; RNA polymerase II regulatory region sequence-specific DNA binding; DNA-binding transcription activator activity, RNA polymerase II-specific; DNA-binding transcription factor activity, RNA polymerase II-specific	nucleus; Golgi apparatus; intracellular membrane-bounded organelle; nuclear body; nucleoplasm
FBXO25	4.28867e-10	-0.161357	0.142	0.241	1.5697e-05	protein ubiquitination	actin binding; ubiquitin-protein transferase activity; protein binding	nucleus; ubiquitin ligase complex; SCF ubiquitin ligase complex
KLF3-AS1	4.50157e-10	-0.112927	0.048	0.114	1.64762e-05
FRAT2	4.59663e-10	-0.126538	0.076	0.156	1.68241e-05	multicellular organism development; Wnt signaling pathway; cell population proliferation; beta-catenin destruction complex disassembly		cytoplasm; cytosol
APP	4.61557e-10	-0.328496	0.789	0.855	1.68934e-05	negative regulation of gene expression; cellular response to amyloid-beta; response to interleukin-1; microglial cell activation; positive regulation of NIK/NF-kappaB signaling; positive regulation of protein phosphorylation; positive regulation of gene expression; positive regulation of amyloid-beta formation; negative regulation of long-term synaptic potentiation; nervous system development; ce…	metal ion binding; DNA binding; serine-type endopeptidase inhibitor activity; protein binding; heparin binding; identical protein binding; transition metal ion binding; peptidase activator activity; signaling receptor activator activity; growth factor receptor binding; peptidase inhibitor activity; signaling receptor binding; enzyme binding; PTB domain binding	plasma membrane; nucleus; cytoplasm; membrane; integral component of membrane; Golgi apparatus; extracellular space; cell projection; extracellular region; perinuclear region of cytoplasm; cytoplasmic vesicle; smooth endoplasmic reticulum; clathrin-coated pit; cell surface; endosome; early endosome; rough endoplasmic reticulum; Golgi-associated vesicle; cell-cell junction; synaptic vesicle; COPII…
MOCS2	4.75368e-10	-0.223214	0.257	0.372	1.7399e-05	Mo-molybdopterin cofactor biosynthetic process; molybdopterin cofactor biosynthetic process	nucleotide binding; molybdopterin synthase activity; transferase activity	cytoplasm; cytosol; molybdopterin synthase complex; nuclear speck; nucleus
LDHB	4.80748e-10	0.191799	0.949	0.963	1.75959e-05	oxidation-reduction process; carbohydrate metabolic process; carboxylic acid metabolic process; pyruvate metabolic process	oxidoreductase activity; catalytic activity; oxidoreductase activity, acting on the CH-OH group of donors, NAD or NADP as acceptor; protein binding; identical protein binding; L-lactate dehydrogenase activity	cytoplasm; membrane; cytosol; membrane raft; extracellular exosome
FAM172A	4.87254e-10	-0.198774	0.273	0.396	1.7834e-05	mRNA processing; RNA splicing; regulation of alternative mRNA splicing, via spliceosome; neural crest cell development; chromatin silencing by small RNA	siRNA binding	nucleus; cytoplasm; endoplasmic reticulum
RTRAF	5.29959e-10	0.235405	0.782	0.74	1.9397e-05	positive regulation of transcription by RNA polymerase II; viral process; tRNA splicing, via endonucleolytic cleavage and ligation; negative regulation of protein kinase activity; RNA transport	RNA binding; protein binding; identical protein binding; RNA polymerase II complex binding	nucleus; cytoplasm; nucleoplasm; cytosol; cytoskeleton; perinuclear region of cytoplasm; centrosome; microtubule organizing center; mitotic spindle; tRNA-splicing ligase complex
KLHL5	5.42417e-10	-0.184551	0.174	0.277	1.9853e-05	post-translational protein modification	actin binding; protein binding	cytoplasm; cytoskeleton; cytosol
IER3	5.56242e-10	-0.176252	0.056	0.125	2.0359e-05	negative regulation of apoptotic process; anatomical structure morphogenesis; apoptotic process; regulation of phosphatidylinositol 3-kinase signaling; regulation of response to DNA damage stimulus	protein binding	membrane; integral component of membrane; nucleus; cytosol
MPP6	5.79922e-10	-0.150267	0.177	0.285	2.12257e-05	protein-containing complex assembly	protein binding	membrane; plasma membrane; extracellular exosome
PNMA8B	5.88519e-10	-0.102802	0.054	0.122	2.15404e-05
LRRC26	6.08601e-10	-0.177775	0.167	0.268	2.22754e-05	ion transport; potassium ion transmembrane transport; positive regulation of voltage-gated potassium channel activity	protein binding; ion channel binding; voltage-gated potassium channel activity; potassium channel regulator activity; potassium channel activator activity	cytoplasm; membrane; integral component of membrane; plasma membrane; cytoskeleton; voltage-gated potassium channel complex; integral component of plasma membrane; extracellular exosome
ATXN2L	6.36609e-10	-0.174815	0.309	0.439	2.33005e-05	stress granule assembly; regulation of cytoplasmic mRNA processing body assembly	RNA binding; protein binding; cadherin binding	nucleus; cytoplasm; nuclear speck; membrane; cytosol; cytoplasmic stress granule; integral component of membrane
CALB2	6.36613e-10	0.53671	0.188	0.327	2.33007e-05	regulation of presynaptic cytosolic calcium ion concentration; regulation of long-term synaptic potentiation	metal ion binding; calcium ion binding; calcium ion binding involved in regulation of presynaptic cytosolic calcium ion concentration	cytosol; presynapse; nucleus; cytoplasm; gap junction; stereocilium; cuticular plate; synaptic membrane; parallel fiber to Purkinje cell synapse; neuron projection; synapse; dendrite
TUBA1A	6.46535e-10	0.239389	1	1	2.36638e-05	microtubule-based process; microtubule cytoskeleton organization; mitotic cell cycle; G2/M transition of mitotic cell cycle; regulation of G2/M transition of mitotic cell cycle; ciliary basal body-plasma membrane docking; cytoskeleton-dependent intracellular transport; cell division; regulation of synapse organization; cytoskeleton organization	nucleotide binding; GTPase activity; GTP binding; protein binding; structural constituent of cytoskeleton; structural molecule activity; protein domain specific binding	nucleus; cytoplasm; microtubule cytoskeleton; cytoskeleton; microtubule; cytosol; extracellular exosome; recycling endosome; cytoplasmic ribonucleoprotein granule; cytoplasmic microtubule; neuromuscular junction; myelin sheath; membrane raft
GDF11	6.68581e-10	0.240337	0.396	0.283	2.44707e-05	skeletal system development; metanephros development; ureteric bud development; negative regulation of cell population proliferation; animal organ morphogenesis; anterior/posterior pattern specification; spinal cord anterior/posterior patterning; pancreas development; negative regulation of cell differentiation; negative regulation of neuron differentiation; cell maturation; camera-type eye morph…	growth factor activity; cytokine activity; protein binding; transforming growth factor beta receptor binding	intracellular membrane-bounded organelle; nucleoplasm; extracellular space; extracellular region; protein-containing complex
UNC119	6.82165e-10	-0.200177	0.412	0.539	2.49679e-05	nervous system development; protein transport; response to stimulus; endocytosis; visual perception; positive regulation of protein tyrosine kinase activity; lipoprotein transport; chemical synaptic transmission; phototransduction; mitotic cytokinesis; negative regulation of clathrin-dependent endocytosis; negative regulation of caveolin-mediated endocytosis	protein binding; lipid binding	cytoplasm; cytoskeleton; spindle pole; centrosome; microtubule organizing center; spindle; spindle midzone; cytosol; intercellular bridge
FEZF1-AS1	7.82933e-10	-0.23577	0.072	0.146	2.86561e-05
ST6GALNAC5	8.17124e-10	0.192858	0.162	0.077	2.99075e-05	protein glycosylation; sialylation; oligosaccharide biosynthetic process; ganglioside biosynthetic process; glycosphingolipid biosynthetic process	transferase activity; sialyltransferase activity; transferase activity, transferring glycosyl groups; alpha-N-acetylgalactosaminide alpha-2,6-sialyltransferase activity	membrane; integral component of membrane; Golgi apparatus; Golgi membrane
TMEM14B	8.33069e-10	-0.225403	0.6	0.698	3.04912e-05	multicellular organism development; nervous system development; cerebral cortex development; regulation of G1/S transition of mitotic cell cycle; neural precursor cell proliferation	protein binding	membrane; integral component of membrane
DECR1	8.90049e-10	0.190727	0.197	0.102	3.25767e-05	oxidation-reduction process; lipid metabolic process; fatty acid metabolic process; positive regulation of cold-induced thermogenesis; protein homotetramerization; fatty acid beta-oxidation	oxidoreductase activity; NADPH binding; 2,4-dienoyl-CoA reductase (NADPH) activity	nucleus; cytosol; nucleoplasm; mitochondrion; mitochondrial matrix
BID	9.06717e-10	0.250795	0.314	0.21	3.31868e-05	regulation of apoptotic process; apoptotic process; positive regulation of apoptotic process; activation of cysteine-type endopeptidase activity involved in apoptotic process; positive regulation of protein complex assembly; positive regulation of release of cytochrome c from mitochondria; extrinsic apoptotic signaling pathway via death domain receptors; apoptotic mitochondrial changes; positive …	protein binding; death receptor binding; ubiquitin protein ligase binding; protein heterodimerization activity	cytoplasm; membrane; cytosol; mitochondrion; mitochondrial outer membrane; mitochondrial membrane; integral component of mitochondrial membrane
USP1	1.00808e-09	-0.149497	0.246	0.364	3.68967e-05	protein deubiquitination; ubiquitin-dependent protein catabolic process; proteolysis; DNA repair; cellular response to DNA damage stimulus; interstrand cross-link repair; response to UV; skeletal system development; regulation of DNA repair; monoubiquitinated protein deubiquitination; DNA damage response, detection of DNA damage	thiol-dependent ubiquitinyl hydrolase activity; hydrolase activity; protein binding; peptidase activity; cysteine-type peptidase activity; cysteine-type endopeptidase activity; thiol-dependent ubiquitin-specific protease activity	nucleus; nucleoplasm
DCDC1	1.05887e-09	0.188554	0.102	0.033	3.87558e-05	intracellular signal transduction; cell division; cell cycle; regulation of mitotic cytokinesis	carbohydrate binding; microtubule binding; protein binding	cytoplasm; cytoskeleton; microtubule; spindle; midbody; mitotic spindle; Flemming body
KCTD16	1.06498e-09	-0.17287	0.073	0.147	3.89793e-05	protein homooligomerization	protein binding	membrane; plasma membrane; cell junction; synapse; postsynaptic membrane; presynaptic membrane
TSHZ3	1.0745e-09	-0.132816	0.061	0.131	3.93278e-05	negative regulation of transcription, DNA-templated; multicellular organism development; regulation of gene expression; regulation of transcription by RNA polymerase II; long-term synaptic potentiation; positive regulation of synaptic transmission, glutamatergic; regulation of respiratory gaseous exchange by nervous system process	nucleic acid binding; metal ion binding; DNA binding; protein binding; chromatin binding; DNA-binding transcription factor activity, RNA polymerase II-specific	nucleus; nucleoplasm; cell projection; nuclear chromatin; growth cone
MXD4	1.12231e-09	0.262878	0.439	0.331	4.10776e-05	negative regulation of cell population proliferation; negative regulation of transcription by RNA polymerase II	protein dimerization activity; DNA binding; protein binding; DNA-binding transcription factor activity, RNA polymerase II-specific; transcription corepressor activity	nucleus; nuclear chromatin
RPL18A	1.16113e-09	0.138335	0.998	1	4.24986e-05	translation; cytoplasmic translation; viral transcription; translational initiation; nuclear-transcribed mRNA catabolic process, nonsense-mediated decay; SRP-dependent cotranslational protein targeting to membrane	RNA binding; structural constituent of ribosome; protein binding	membrane; ribosome; cytosolic large ribosomal subunit; cytosol; polysomal ribosome
SHANK2	1.3634e-09	-0.162068	0.209	0.327	4.99019e-05	synapse assembly; learning; memory; adult behavior; social behavior; exploration behavior; positive regulation of synaptic transmission, glutamatergic; long-term synaptic potentiation; long-term synaptic depression; vocalization behavior; maintenance of postsynaptic density structure; regulation of AMPA receptor activity; brain morphogenesis; synaptic growth at neuromuscular junction; dendritic s…	protein binding; ionotropic glutamate receptor binding; SH3 domain binding; receptor signaling complex adaptor activity; GKAP/Homer scaffold activity	photoreceptor outer segment; photoreceptor inner segment; neurofilament; plasma membrane; ionotropic glutamate receptor complex; neuron projection; dendritic spine; postsynaptic membrane; cytoplasm; membrane; cell projection; cell junction; synapse; cytosol; growth cone; postsynaptic density; apical plasma membrane; dendrite; ciliary membrane; neuronal cell body; brush border membrane; neuron spi…
MICOS10	1.45853e-09	0.258139	0.683	0.606	5.33835e-05		protein binding	mitochondrial inner membrane; mitochondrion; MICOS complex; membrane; integral component of membrane
PFKFB3	1.46582e-09	-0.171353	0.097	0.178	5.36504e-05	phosphorylation; dephosphorylation; metabolic process; carbohydrate phosphorylation; fructose 2,6-bisphosphate metabolic process; fructose metabolic process; positive regulation of glycolytic process; brain development	nucleotide binding; ATP binding; kinase activity; transferase activity; hydrolase activity; catalytic activity; 6-phosphofructo-2-kinase activity; fructose-2,6-bisphosphate 2-phosphatase activity	nucleoplasm; cytosol
CCDC107	1.48209e-09	-0.195005	0.43	0.552	5.42459e-05			membrane; integral component of membrane
HCFC1R1	1.48376e-09	-0.199804	0.478	0.602	5.43071e-05			nucleus; cytoplasm; nucleoplasm
CPEB4	1.50543e-09	-0.205005	0.477	0.602	5.51002e-05	regulation of translation; cellular response to amino acid stimulus; negative regulation of cytoplasmic translation; negative regulation of neuron apoptotic process; response to ischemia; cellular response to glucose starvation; ionotropic glutamate receptor signaling pathway; translation; cellular response to decreased oxygen levels	nucleic acid binding; RNA binding; metal ion binding; protein binding; mRNA 3'-UTR binding; translation regulator activity; translation repressor activity, mRNA regulatory element binding; translation factor activity, RNA binding; ribosome binding	nucleus; cytoplasm; membrane; endoplasmic reticulum; plasma membrane; cell projection; perinuclear region of cytoplasm; cell junction; synapse; postsynaptic membrane; dendrite; axon; neuron projection; growth cone; postsynaptic density; dendritic spine; messenger ribonucleoprotein complex; postsynapse
ANKRD46	1.53488e-09	-0.198384	0.467	0.587	5.61781e-05		protein binding	membrane; integral component of membrane
CHMP2B	1.67304e-09	-0.22438	0.28	0.39	6.1235e-05	protein transport; vacuolar transport; endosomal transport; macroautophagy; viral life cycle; multivesicular body assembly; viral budding via host ESCRT complex; late endosome to vacuole transport; cognition; mitotic metaphase plate congression; regulation of centrosome duplication; nucleus organization; endosome transport via multivesicular body sorting pathway; midbody abscission; regulation of…	protein binding; cadherin binding; protein domain specific binding	cytoplasm; membrane; cytosol; plasma membrane; lysosome; endosome; late endosome membrane; extracellular exosome; late endosome; intracellular; ESCRT III complex; multivesicular body; postsynaptic density; glutamatergic synapse
PHYHIPL	1.80597e-09	-0.201022	0.36	0.476	6.61003e-05		protein binding	cytoplasm
FJX1	1.87124e-09	-0.288732	0.439	0.555	6.84894e-05	cell-cell signaling; retina layer formation		extracellular region; extracellular space
NDST4	1.88507e-09	-0.127669	0.074	0.15	6.89953e-05	metabolic process; heparan sulfate proteoglycan biosynthetic process; heparin biosynthetic process; heparan sulfate proteoglycan biosynthetic process, polysaccharide chain biosynthetic process	transferase activity; hydrolase activity; catalytic activity; sulfotransferase activity; deacetylase activity; [heparan sulfate]-glucosamine N-sulfotransferase activity; heparan sulfate N-acetylglucosaminyltransferase activity	membrane; integral component of membrane; Golgi apparatus; Golgi membrane
TMEM160	1.89574e-09	-0.234311	0.599	0.697	6.93858e-05			membrane; integral component of membrane
DUBR	1.95644e-09	-0.121493	0.099	0.184	7.16076e-05
PTN	1.97602e-09	-0.440912	0.343	0.452	7.23244e-05	signal transduction; negative regulation of phosphoprotein phosphatase activity; ossification; liver development; leukocyte chemotaxis involved in inflammatory response; positive regulation of leukocyte chemotaxis; negative regulation of neuroblast proliferation; brain development; heart development; learning; memory; regulation of cell shape; positive regulation of cell-substrate adhesion; posit…	growth factor activity; protein phosphatase inhibitor activity; glycosaminoglycan binding; heparin binding; chondroitin sulfate proteoglycan binding; vascular endothelial growth factor binding; proteoglycan binding; syndecan binding; heparan sulfate binding; protein binding; protein kinase binding; integrin binding; chondroitin sulfate binding	extracellular space; extracellular region; basement membrane; cytoplasm; cell surface; membrane; neuromuscular junction; perinuclear region of cytoplasm; presynapse; postsynapse; plasma membrane; endoplasmic reticulum; protein-containing complex
DIRAS2	2.20825e-09	-0.153179	0.133	0.228	8.08241e-05	signal transduction	nucleotide binding; GTPase activity; GTP binding; GDP binding	membrane; plasma membrane
TSC22D1	2.30777e-09	-0.234753	0.914	0.939	8.44666e-05	regulation of transcription, DNA-templated; regulation of transcription by RNA polymerase II; transcription by RNA polymerase II	DNA-binding transcription factor activity; protein binding; DNA-binding transcription factor activity, RNA polymerase II-specific	nucleus; cytoplasm
CPNE1	2.37523e-09	0.205585	0.295	0.189	8.69357e-05	proteolysis; cell differentiation; neutrophil degranulation; negative regulation of gene expression; cellular response to calcium ion; lipid metabolic process; positive regulation of protein kinase B signaling; regulation of I-kappaB kinase/NF-kappaB signaling; negative regulation of NIK/NF-kappaB signaling; vesicle-mediated transport; glycerophospholipid biosynthetic process; negative regulation…	protein homodimerization activity; calcium ion binding; protein binding; calcium-dependent phospholipid binding; endopeptidase activity; NF-kappaB binding; transporter activity; phosphatidylserine binding	nucleus; cytoplasm; membrane; nucleoplasm; nuclear membrane; cytosol; plasma membrane; extracellular exosome; azurophil granule membrane
ULK2	2.40839e-09	-0.119926	0.137	0.235	8.81494e-05	protein phosphorylation; phosphorylation; signal transduction; autophagy; nervous system development; positive regulation by symbiont of host autophagy; regulation of autophagy; autophagosome assembly; protein autophosphorylation; response to starvation; axonogenesis; axon extension; negative regulation of collateral sprouting	nucleotide binding; protein kinase activity; protein serine/threonine kinase activity; ATP binding; kinase activity; transferase activity; protein binding	membrane; cytoplasmic vesicle; cytoplasmic vesicle membrane; cytosol; phagophore assembly site membrane; phagophore assembly site
GLCCI1	2.423e-09	0.276236	0.405	0.306	8.86843e-05			cytoplasm
CLMP	2.47443e-09	-0.116304	0.056	0.124	9.05667e-05	digestive tract development		membrane; integral component of membrane; plasma membrane; cell junction; cell surface; bicellular tight junction; cytoplasmic microtubule
LDLR	2.49235e-09	0.217993	0.236	0.141	9.12226e-05	cholesterol homeostasis; cellular response to low-density lipoprotein particle stimulus; negative regulation of astrocyte activation; negative regulation of microglial cell activation; lipid metabolic process; steroid metabolic process; lipid transport; receptor-mediated endocytosis; phagocytosis; long-term memory; cholesterol metabolic process; positive regulation of gene expression; negative re…	calcium ion binding; protein binding; amyloid-beta binding; low-density lipoprotein particle receptor activity; low-density lipoprotein particle binding; very-low-density lipoprotein particle receptor activity; identical protein binding; virus receptor activity; protease binding; clathrin heavy chain binding	apical part of cell; membrane; integral component of membrane; Golgi apparatus; plasma membrane; cell; lysosome; endosome; early endosome; late endosome; cell surface; basolateral plasma membrane; somatodendritic compartment; sorting endosome; clathrin-coated pit; endosome membrane; integral component of plasma membrane; external side of plasma membrane; receptor complex; endolysosome membrane; c…
CHST1	2.54766e-09	-0.133471	0.067	0.138	9.32469e-05	carbohydrate metabolic process; inflammatory response; galactose metabolic process; keratan sulfate biosynthetic process; polysaccharide metabolic process; N-acetylglucosamine metabolic process; sulfur compound metabolic process; keratan sulfate metabolic process	transferase activity; sulfotransferase activity; N-acetylglucosamine 6-O-sulfotransferase activity; keratan sulfotransferase activity	membrane; integral component of membrane; Golgi apparatus; Golgi membrane; trans-Golgi network
RIPOR2	2.55011e-09	-0.296391	0.41	0.508	9.33367e-05	cell adhesion; negative regulation of cell adhesion; sensory perception of sound; negative regulation of Rho protein signal transduction; establishment of protein localization; skeletal muscle fiber development; protein homooligomerization; positive regulation of filopodium assembly; auditory receptor cell stereocilium organization; cellular response to mechanical stimulus; positive regulation of…	identical protein binding; protein binding; 14-3-3 protein binding	cytoplasm; membrane; apical plasma membrane; stereocilium; stereocilium membrane; plasma membrane; cytoskeleton; cell projection; filopodium
C3orf14	2.63557e-09	-0.201254	0.399	0.534	9.64645e-05
CHEK1	2.68919e-09	0.198102	0.214	0.122	9.84269e-05	protein phosphorylation; DNA damage checkpoint; G2/M transition of mitotic cell cycle; inner cell mass cell proliferation; DNA repair; cellular response to DNA damage stimulus; nucleus organization; mitotic cell cycle checkpoint; regulation of gene expression; regulation of transcription from RNA polymerase II promoter in response to UV-induced DNA damage; histone H3-T11 phosphorylation; regulati…	protein kinase activity; ATP binding; histone kinase activity (H3-T11 specific); nucleotide binding; protein serine/threonine kinase activity; kinase activity; transferase activity; protein binding; protein domain specific binding	intracellular membrane-bounded organelle; nucleoplasm; chromatin; nucleus; replication fork; cytoplasm; extracellular space; cytoskeleton; centrosome; microtubule organizing center; cytosol; protein-containing complex; chromosome, telomeric region; condensed nuclear chromosome
DNAJB2	2.71149e-09	-0.153521	0.204	0.312	9.92433e-05	protein refolding; negative regulation of cell population proliferation; positive regulation of proteasomal ubiquitin-dependent protein catabolic process; negative regulation of cell growth; chaperone-mediated protein folding; response to unfolded protein; negative regulation of protein binding; positive regulation of ATPase activity; ubiquitin-dependent ERAD pathway; negative regulation of inclu…	unfolded protein binding; protein binding; chaperone binding; ATPase activator activity; Hsp70 protein binding; ubiquitin binding; ubiquitin-dependent protein binding	nucleus; cytoplasm; membrane; endoplasmic reticulum; endoplasmic reticulum membrane; nuclear membrane; cytosol; intrinsic component of endoplasmic reticulum membrane; proteasome complex
ARG2	2.77202e-09	-0.193812	0.372	0.501	0.000101459	urea cycle; ureteric bud development; negative regulation of type 2 immune response; arginine metabolic process; striated muscle contraction; regulation of interleukin-1 beta secretion; negative regulation of macrophage inflammatory protein 1 alpha production; negative regulation of chemokine (C-C motif) ligand 4 production; negative regulation of chemokine (C-C motif) ligand 5 production; negati…	metal ion binding; hydrolase activity; hydrolase activity, acting on carbon-nitrogen (but not peptide) bonds, in linear amidines; arginase activity; manganese ion binding	mitochondrion; cytoplasm; mitochondrial matrix
NECTIN1	2.83357e-09	-0.160206	0.188	0.293	0.000103712	cell adhesion; immune response; viral process; viral entry into host cell; cell-cell adhesion; homophilic cell adhesion via plasma membrane adhesion molecules; adherens junction organization; heterophilic cell-cell adhesion via plasma membrane cell adhesion molecules; virion attachment to host cell; regulation of synapse assembly; lens morphogenesis in camera-type eye; desmosome organization; iro…	protein binding; protein homodimerization activity; identical protein binding; signaling receptor activity; cell adhesion molecule binding; coreceptor activity; virus receptor activity; carbohydrate binding; virion binding; protein heterodimerization activity	membrane; integral component of membrane; plasma membrane; extracellular region; cell junction; synapse; cell-cell junction; adherens junction; cell-cell adherens junction; presynaptic membrane; axon; dendrite; growth cone membrane; neuron projection; intracellular membrane-bounded organelle; apical junction complex; cell-cell contact zone; hippocampal mossy fiber to CA3 synapse; integral compone…
VOPP1	2.85895e-09	-0.167305	0.333	0.459	0.00010464			membrane; integral component of membrane; cytoplasmic vesicle; cytoplasmic vesicle membrane; integral component of organelle membrane; endosome
FBXW7	2.95921e-09	-0.250841	0.305	0.421	0.00010831	negative regulation of gene expression; protein stabilization; positive regulation of ERK1 and ERK2 cascade; negative regulation of triglyceride biosynthetic process; lipid homeostasis; negative regulation of Notch signaling pathway; protein ubiquitination; rhythmic process; protein polyubiquitination; proteasome-mediated ubiquitin-dependent protein catabolic process; post-translational protein m…	protein binding; identical protein binding; ubiquitin binding; cyclin binding; ubiquitin protein ligase binding; protein binding, bridging; ubiquitin-protein transferase activator activity; phosphothreonine residue binding	nucleus; cytoplasm; nucleoplasm; nucleolus; cytosol; Parkin-FBXW7-Cul1 ubiquitin ligase complex; SCF ubiquitin ligase complex; mitochondrion; endoplasmic reticulum; Golgi apparatus; perinuclear region of cytoplasm
RCN2	3.07864e-09	0.209901	0.897	0.892	0.000112681		metal ion binding; calcium ion binding; protein binding	endoplasmic reticulum; nucleolus; endoplasmic reticulum lumen
IER2	3.16644e-09	-0.256349	0.525	0.634	0.000115895	positive regulation of transcription by RNA polymerase II; neuron differentiation; cell motility; response to fibroblast growth factor	DNA binding; DNA-binding transcription activator activity, RNA polymerase II-specific; RNA polymerase II regulatory region sequence-specific DNA binding	nucleus; cytoplasm; nucleoplasm
HDDC2	3.19247e-09	0.242382	0.352	0.252	0.000116848	dephosphorylation	protein binding; 5'-deoxynucleotidase activity
RLF	3.2757e-09	-0.196042	0.415	0.542	0.000119894	positive regulation of transcription, DNA-templated; positive regulation of transcription by RNA polymerase II; regulation of transcription, DNA-templated; chromosome organization; DNA integration; regulation of DNA methylation; histone H3-K4 monomethylation	nucleic acid binding; metal ion binding; DNA binding; protein binding; zinc ion binding	nucleus
BNIP3	3.28667e-09	-0.395912	0.669	0.748	0.000120295	cellular response to hypoxia; negative regulation of apoptotic process; apoptotic process; defense response to virus; positive regulation of apoptotic process; positive regulation of autophagy; response to hypoxia; viral process; cellular response to mechanical stimulus; positive regulation of release of cytochrome c from mitochondria; positive regulation of mitochondrial fission; cell death; neu…	protein homodimerization activity; protein binding; identical protein binding; protein heterodimerization activity; GTPase binding	nucleus; cytoplasm; membrane; integral component of membrane; mitochondrion; mitochondrial outer membrane; nucleoplasm; dendrite; endoplasmic reticulum; mitochondrial membrane; mitochondrial envelope; nuclear envelope; integral component of mitochondrial outer membrane; postsynaptic density
DNAJC3-DT	3.30983e-09	-0.108541	0.081	0.158	0.000121143
RPL11	3.31374e-09	0.135021	0.999	0.998	0.000121286	translation; cytoplasmic translation; rRNA processing; ribosomal large subunit assembly; viral transcription; ribosomal large subunit biogenesis; negative regulation of proteasomal ubiquitin-dependent protein catabolic process; protein targeting; translational initiation; protein localization to nucleus; nuclear-transcribed mRNA catabolic process, nonsense-mediated decay; SRP-dependent cotranslat…	RNA binding; structural constituent of ribosome; protein binding; rRNA binding; ubiquitin protein ligase binding; 5S rRNA binding; ubiquitin ligase inhibitor activity	nucleus; cytoplasm; membrane; ribosome; nucleoplasm; nucleolus; cytosolic large ribosomal subunit; cytosol; extracellular exosome; protein-containing complex; polysomal ribosome; intracellular
PKIA	3.3817e-09	-0.222904	0.779	0.845	0.000123774	negative regulation of cAMP-dependent protein kinase activity; phosphorylation; negative regulation of transcription by RNA polymerase II; negative regulation of protein kinase activity; regulation of G2/M transition of mitotic cell cycle; negative regulation of protein import into nucleus; negative regulation of catalytic activity; negative regulation of protein serine/threonine kinase activity	kinase activity; protein binding; protein kinase inhibitor activity; cAMP-dependent protein kinase inhibitor activity; protein kinase A catalytic subunit binding	nucleus; cytoplasm
AL365361.1	3.4535e-09	-0.100487	0.051	0.117	0.000126402
SERF2	3.47415e-09	0.211095	0.907	0.905	0.000127157	protein destabilization		nucleus; cytosol
PSMA7	3.48606e-09	0.170758	0.978	0.97	0.000127593	proteolysis; proteolysis involved in cellular protein catabolic process; ubiquitin-dependent protein catabolic process; Fc-epsilon receptor signaling pathway; T cell receptor signaling pathway; MAPK cascade; protein polyubiquitination; stimulatory C-type lectin receptor signaling pathway; antigen processing and presentation of exogenous peptide antigen via MHC class I, TAP-dependent; regulation o…	hydrolase activity; peptidase activity; threonine-type endopeptidase activity; protein binding; endopeptidase activity; identical protein binding	cytoplasm; proteasome complex; proteasome core complex; proteasome core complex, alpha-subunit complex; nucleus; postsynapse; nucleoplasm; cytosol; extracellular exosome
VSNL1	3.49838e-09	-0.21641	0.098	0.182	0.000128044	positive regulation of insulin secretion involved in cellular response to glucose stimulus; positive regulation of exocytosis; negative regulation of insulin secretion	metal ion binding; calcium ion binding; protein binding	cytosol; membrane
IRF2BP2	3.4992e-09	-0.245635	0.478	0.591	0.000128074	positive regulation of transcription by RNA polymerase II; immature B cell differentiation	metal ion binding; RNA polymerase II regulatory region sequence-specific DNA binding; DNA-binding transcription activator activity, RNA polymerase II-specific	nucleus; cytoplasm; nucleoplasm
B3GALT2	3.52273e-09	-0.153435	0.105	0.188	0.000128935	protein glycosylation; protein N-linked glycosylation; protein O-linked glycosylation; galactosylceramide biosynthetic process; oligosaccharide biosynthetic process	transferase activity; transferase activity, transferring glycosyl groups; galactosyltransferase activity; acetylglucosaminyltransferase activity; acetylgalactosaminyltransferase activity; UDP-galactose:beta-N-acetylglucosamine beta-1,3-galactosyltransferase activity; glucosaminylgalactosylglucosylceramide beta-galactosyltransferase activity	membrane; integral component of membrane; Golgi apparatus; Golgi membrane; endoplasmic reticulum
SLC25A13	3.66933e-09	0.187147	0.172	0.088	0.000134301	transmembrane transport; ATP biosynthetic process; gluconeogenesis; cellular respiration; response to calcium ion; L-glutamate transmembrane transport; aspartate transmembrane transport; malate-aspartate shuttle; L-aspartate transmembrane transport; mitochondrial transport	transmembrane transporter activity; metal ion binding; calcium ion binding; identical protein binding; L-glutamate transmembrane transporter activity; L-aspartate transmembrane transporter activity	membrane; integral component of membrane; mitochondrion; mitochondrial inner membrane; integral component of plasma membrane
C11orf96	3.69723e-09	0.405985	0.468	0.372	0.000135322
LRRC8B	3.80426e-09	-0.150687	0.143	0.238	0.00013924	inorganic anion transport; ion transport; transmembrane transport; anion transmembrane transport	protein binding; volume-sensitive anion channel activity	membrane; integral component of membrane; cytoplasm; endoplasmic reticulum; endoplasmic reticulum membrane; plasma membrane; integral component of plasma membrane; ion channel complex
YWHAH	3.87606e-09	-0.234962	0.77	0.828	0.000141868	intracellular protein transport; oxidation-reduction process; negative regulation of dendrite morphogenesis; positive regulation of transcription, DNA-templated; substantia nigra development; regulation of sodium ion transmembrane transporter activity; membrane organization; glucocorticoid receptor signaling pathway; regulation of synaptic plasticity; positive regulation of protein insertion into…	monooxygenase activity; protein domain specific binding; protein binding; actin binding; ion channel binding; identical protein binding; protein heterodimerization activity; sodium channel regulator activity; insulin-like growth factor receptor binding; enzyme binding; glucocorticoid receptor binding	mitochondrion; cytoplasm; cytosol; extracellular exosome; plasma membrane; intercalated disc
MARCKS	3.90206e-09	-0.153114	0.994	0.998	0.000142819	actin filament bundle assembly; protein homooligomerization; actin crosslink formation	actin binding; calmodulin binding; actin filament binding; protein kinase C binding; identical protein binding	cytoplasm; membrane; cytoskeleton; focal adhesion; plasma membrane; extracellular exosome; actin cytoskeleton; centrosome; cell cortex; actin filament bundle; germinal vesicle
KIAA1143	4.00046e-09	-0.157779	0.263	0.377	0.000146421		protein binding
NDUFC2	4.26202e-09	-0.199977	0.875	0.907	0.000155994	oxidation-reduction process; mitochondrial electron transport, NADH to ubiquinone; mitochondrial respiratory chain complex I assembly; neutrophil degranulation	NADH dehydrogenase (ubiquinone) activity	membrane; integral component of membrane; mitochondrion; mitochondrial inner membrane; respirasome; plasma membrane; cytoplasm; mitochondrial respiratory chain complex I; azurophil granule membrane
PCP4L1	4.29633e-09	-0.105972	0.06	0.128	0.00015725
DLG2	4.35236e-09	-0.14968	0.162	0.263	0.000159301	receptor clustering; maintenance of postsynaptic density structure; chemical synaptic transmission; MAPK cascade; negative regulation of phosphatase activity; GMP metabolic process; GDP metabolic process; cell-cell adhesion; regulation of NMDA receptor activity; establishment or maintenance of epithelial cell apical/basal polarity; receptor localization to synapse; cellular response to potassium …	protein binding; guanylate kinase activity; kinase binding; structural constituent of postsynaptic density	membrane; axon cytoplasm; plasma membrane; cell projection; cell junction; synapse; postsynaptic membrane; axon; neuron projection; cytosol; postsynaptic density; neuromuscular junction; basolateral plasma membrane; postsynaptic density membrane; voltage-gated potassium channel complex; ionotropic glutamate receptor complex; juxtaparanode region of axon; glutamatergic synapse
CCSER1	4.6043e-09	-0.205454	0.154	0.249	0.000168522
MYO6	4.68198e-09	0.252486	0.499	0.4	0.000171365	intracellular protein transport; protein transport; positive regulation of transcription by RNA polymerase II; endocytosis; sensory perception of sound; DNA damage response, signal transduction by p53 class mediator; actin filament-based movement; regulation of secretion; response to drug	ATP binding; actin filament binding; motor activity; nucleotide binding; actin binding; protein binding; calmodulin binding; ADP binding; minus-end directed microfilament motor activity	myosin complex; nucleus; cytoplasm; membrane; Golgi apparatus; cytosol; plasma membrane; cell projection; perinuclear region of cytoplasm; cytoplasmic vesicle; clathrin-coated pit; nucleoplasm; clathrin-coated vesicle; filopodium; extracellular exosome; cell cortex; ruffle membrane; nuclear membrane; microvillus; filamentous actin; unconventional myosin complex; ruffle; clathrin-coated vesicle me…
MIR100HG	4.74891e-09	-0.212763	0.298	0.411	0.000173815
C1orf53	4.84155e-09	-0.102331	0.071	0.143	0.000177206
TTC39C	5.14934e-09	-0.128086	0.111	0.196	0.000188471	cilium assembly; otolith morphogenesis	protein binding
RPS7	5.21423e-09	0.166673	0.998	0.995	0.000190846	translation; rRNA processing; ribosomal small subunit biogenesis; viral transcription; translational initiation; nuclear-transcribed mRNA catabolic process, nonsense-mediated decay; SRP-dependent cotranslational protein targeting to membrane; positive regulation of gene expression; protein stabilization; negative regulation of ubiquitin protein ligase activity; negative regulation of ubiquitin-de…	RNA binding; structural constituent of ribosome; protein binding; protein kinase binding; mRNA 3'-UTR binding; mRNA 5'-UTR binding; ubiquitin ligase inhibitor activity	nucleus; cytoplasm; membrane; ribosome; cytoskeleton; cytosolic small ribosomal subunit; nucleolus; focal adhesion; centrosome; microtubule organizing center; small-subunit processome; nucleoplasm; cytosol; protein-containing complex; ribonucleoprotein complex; intracellular; synapse
EPN2	5.31128e-09	-0.192502	0.371	0.483	0.000194398	endocytosis; negative regulation of sprouting angiogenesis; positive regulation of Notch signaling pathway; membrane organization; negative regulation of vascular endothelial growth factor receptor signaling pathway	lipid binding; protein binding; cadherin binding	clathrin coat of endocytic vesicle; cytoplasm; intracellular membrane-bounded organelle; cytoplasmic vesicle; clathrin-coated vesicle; cytosol
RPS17	5.55873e-09	0.175365	0.986	0.994	0.000203455	translation; translational initiation; rRNA processing; ribosomal small subunit biogenesis; viral transcription; nuclear-transcribed mRNA catabolic process, nonsense-mediated decay; SRP-dependent cotranslational protein targeting to membrane; erythrocyte homeostasis	RNA binding; structural constituent of ribosome	membrane; ribosome; cytosolic small ribosomal subunit; focal adhesion; nucleoplasm; cytosol; synapse; intracellular
STK33	5.69095e-09	0.165458	0.136	0.061	0.000208295	protein phosphorylation; phosphorylation; protein autophosphorylation; signal transduction in response to DNA damage; mitotic DNA damage checkpoint	nucleotide binding; protein kinase activity; protein serine/threonine kinase activity; ATP binding; kinase activity; transferase activity	cytoplasm; perinuclear region of cytoplasm; nucleus
SYT7	5.74798e-09	-0.158264	0.154	0.247	0.000210382	exocytosis; vesicle-mediated transport; phagocytosis; regulation of insulin secretion; regulation of dopamine secretion; calcium-ion regulated exocytosis; regulation of calcium ion-dependent exocytosis; cellular response to calcium ion; plasma membrane repair; synaptic vesicle recycling; regulation of bone remodeling; calcium ion-regulated exocytosis of neurotransmitter; regulation of phagocytosi…	metal ion binding; protein binding; calcium-dependent phospholipid binding; calmodulin binding; calcium ion binding; phosphatidylinositol-4,5-bisphosphate binding; SNARE binding; clathrin binding; phosphatidylserine binding; syntaxin binding	membrane; integral component of membrane; cytosol; lysosomal membrane; plasma membrane; cell junction; cytoplasmic vesicle; synapse; lysosome; peroxisome; peroxisomal membrane; extracellular exosome; phagocytic vesicle membrane; synaptic vesicle; presynaptic membrane; synaptic vesicle membrane; exocytic vesicle; transport vesicle membrane; early phagosome; dense core granule; hippocampal mossy fi…
ATN1	5.83308e-09	-0.175264	0.346	0.465	0.000213497	negative regulation of transcription by RNA polymerase II; central nervous system development; neuron apoptotic process	protein binding; DNA binding; transcription corepressor activity; protein domain specific binding; RNA polymerase II transcription factor binding	nucleus; cytoplasm; nucleoplasm; perinuclear region of cytoplasm; cell junction; nuclear matrix
KLHL23	5.85829e-09	-0.20438	0.62	0.707	0.000214419		protein binding
AGAP1	5.89755e-09	-0.217616	0.437	0.541	0.000215856	protein transport; positive regulation of GTPase activity	metal ion binding; nucleotide binding; GTPase activity; GTP binding; GTPase activator activity; phospholipid binding; protein binding	cytoplasm; nucleus
SEPTIN3	5.89967e-09	-0.20532	0.647	0.73	0.000215934	cell division; cell cycle; cytoskeleton-dependent cytokinesis	nucleotide binding; GTP binding; protein binding; identical protein binding; GTPase activity	cytoplasm; cytoskeleton; cell junction; synapse; neuron projection; microtubule cytoskeleton; septin ring; septin complex; presynapse; presynaptic cytoskeleton
MIR4453HG	5.97383e-09	-0.110206	0.063	0.131	0.000218648
DGCR9	6.04497e-09	-0.135004	0.153	0.249	0.000221252
PTPRE	6.14865e-09	-0.107019	0.054	0.118	0.000225047	protein dephosphorylation; dephosphorylation; peptidyl-tyrosine dephosphorylation; negative regulation of insulin receptor signaling pathway	hydrolase activity; phosphoprotein phosphatase activity; protein tyrosine phosphatase activity; phosphatase activity; protein binding; transmembrane receptor protein tyrosine phosphatase activity	nucleus; cytoplasm; membrane; integral component of membrane; plasma membrane
SUCO	6.1575e-09	-0.212973	0.393	0.515	0.000225371	multicellular organism development; positive regulation of collagen biosynthetic process; positive regulation of osteoblast differentiation; regulation of bone remodeling; ossification		membrane; integral component of membrane; endoplasmic reticulum; rough endoplasmic reticulum; cytoplasm; rough endoplasmic reticulum membrane
MARK1	6.37653e-09	-0.196379	0.272	0.378	0.000233387	protein phosphorylation; phosphorylation; Wnt signaling pathway; microtubule cytoskeleton organization; intracellular signal transduction; cytoskeleton organization; peptidyl-serine phosphorylation; neuron migration; regulation of neuron projection development; regulation of dendrite development; establishment of mitochondrion localization	metal ion binding; nucleotide binding; protein kinase activity; protein serine/threonine kinase activity; ATP binding; kinase activity; transferase activity; magnesium ion binding; lipid binding; protein binding; phosphatidylinositol-4,5-bisphosphate binding; tau protein binding; phosphatidylserine binding; phosphatidic acid binding; tau-protein kinase activity	cytoplasm; membrane; plasma membrane; cytoskeleton; cell projection; dendrite; microtubule cytoskeleton
PAK1	6.4107e-09	-0.177129	0.323	0.44	0.000234638	positive regulation of cell population proliferation; protein phosphorylation; phosphorylation; exocytosis; metabolic process; cellular response to DNA damage stimulus; apoptotic process; Fc-epsilon receptor signaling pathway; Fc-gamma receptor signaling pathway involved in phagocytosis; T cell receptor signaling pathway; neuron projection morphogenesis; positive regulation of protein phosphoryla…	nucleotide binding; protein kinase activity; protein serine/threonine kinase activity; ATP binding; kinase activity; transferase activity; protein binding; catalytic activity; collagen binding; Rac GTPase binding; protein kinase binding	nucleus; cytoplasm; membrane; cytosol; plasma membrane; chromosome; cell projection; cell junction; nucleoplasm; focal adhesion; dendrite; axon; ruffle membrane; protein-containing complex; nuclear membrane; invadopodium; Z disc; ruffle; intercalated disc; cell-cell junction; actin filament; lamellipodium
AHSA1	6.69999e-09	-0.162678	0.425	0.539	0.000245226	positive regulation of ATPase activity	ATPase activator activity; Hsp90 protein binding; protein binding; chaperone binding; cadherin binding	cytosol; cytoplasm; endoplasmic reticulum; extracellular exosome
VDAC1	6.84259e-09	-0.195891	0.791	0.85	0.000250446	transmembrane transport; inorganic anion transport; anion transmembrane transport; ion transport; apoptotic process; anion transport; viral process; regulation of autophagy of mitochondrion; epithelial cell differentiation; pyruvate metabolic process; macroautophagy; behavioral fear response; mitochondrial calcium ion transmembrane transport; chemical synaptic transmission; neuron-neuron synaptic…	voltage-gated anion channel activity; protein binding; identical protein binding; ion channel binding; protein kinase binding; porin activity; anion channel activity; protein-containing complex binding	nucleus; membrane; integral component of membrane; mitochondrion; mitochondrial outer membrane; plasma membrane; membrane raft; extracellular exosome; mitochondrial nucleoid; pore complex; mitochondrial permeability transition pore complex; synaptic vesicle; protein-containing complex
TMEM132B	6.90816e-09	-0.180718	0.043	0.101	0.000252846			membrane; integral component of membrane
NRIP1	7.1277e-09	0.256174	0.592	0.478	0.000260881	regulation of transcription by RNA polymerase II; circadian rhythm; rhythmic process; circadian regulation of gene expression; positive regulation of transcription, DNA-templated; negative regulation of transcription by RNA polymerase II; positive regulation of transcription by RNA polymerase II; androgen receptor signaling pathway; cellular response to estradiol stimulus; ovarian follicle ruptur…	signaling receptor binding; transcription coregulator activity; protein binding; transcription coactivator activity; transcription corepressor activity; estrogen receptor binding; RNA polymerase II proximal promoter sequence-specific DNA binding; nuclear hormone receptor binding; androgen receptor binding; glucocorticoid receptor binding; retinoid X receptor binding; histone deacetylase binding; …	nucleus; nucleolus; nucleoplasm; nuclear chromatin; histone deacetylase complex; nuclear speck
HECTD2	7.33378e-09	-0.162736	0.207	0.312	0.000268424	protein ubiquitination; protein polyubiquitination	transferase activity; ubiquitin-protein transferase activity	cytosol
SLC5A3	7.552e-09	-0.172368	0.231	0.337	0.000276411	transmembrane transport; ion transport; sodium ion transport; glucose transmembrane transport; inositol metabolic process; peripheral nervous system development; myo-inositol transport; regulation of respiratory gaseous exchange	transmembrane transporter activity; symporter activity; glucose:sodium symporter activity; myo-inositol:sodium symporter activity	membrane; integral component of membrane; plasma membrane; integral component of plasma membrane
CALD1	7.57313e-09	-0.229	0.264	0.367	0.000277184	muscle contraction	actin binding; protein binding; calmodulin binding; myosin binding; cadherin binding; tropomyosin binding	cytoplasm; intracellular membrane-bounded organelle; plasma membrane; actin cytoskeleton; cytoskeleton; cytosol; myofibril; membrane; actin cap
NPDC1	7.5918e-09	-0.20884	0.57	0.662	0.000277867	regulation of immune response	protein binding	membrane; integral component of membrane; plasma membrane
NONO	7.99602e-09	0.218129	0.771	0.737	0.000292662	mRNA processing; RNA splicing; DNA repair; DNA recombination; cellular response to DNA damage stimulus; circadian rhythm; rhythmic process; immune system process; innate immune response; regulation of circadian rhythm; negative regulation of transcription, DNA-templated; activation of innate immune response; negative regulation of oxidative stress-induced neuron intrinsic apoptotic signaling path…	nucleic acid binding; RNA binding; DNA binding; protein binding; identical protein binding; RNA polymerase II distal enhancer sequence-specific DNA binding; chromatin binding; E-box binding; transcription regulatory region sequence-specific DNA binding	nucleus; nuclear speck; membrane; nucleoplasm; nucleolus; RNA polymerase II transcription factor complex; nuclear matrix; paraspeckles
CDR2	8.30351e-09	-0.108846	0.066	0.133	0.000303917		protein binding	cytoplasm
TCEAL5	8.30533e-09	-0.200776	0.179	0.276	0.000303984		protein binding; WW domain binding	nucleus
CD63	8.35037e-09	0.242571	0.762	0.702	0.000305632	protein transport; cell migration; neutrophil degranulation; platelet degranulation; regulation of vascular endothelial growth factor signaling pathway; cell-matrix adhesion; positive regulation of receptor internalization; cellular protein localization; endosome to melanosome transport; pigment granule maturation; regulation of potassium ion transmembrane transport; positive regulation of integr…	protein binding	membrane; integral component of membrane; lysosomal membrane; extracellular space; plasma membrane; extracellular region; melanosome; cell surface; lysosome; endosome; late endosome membrane; integral component of plasma membrane; extracellular exosome; endosome membrane; platelet dense granule membrane; multivesicular body membrane; intrinsic component of plasma membrane; azurophil granule membr…
SLC25A4	8.48917e-09	-0.189771	0.684	0.779	0.000310712	transmembrane transport; apoptotic mitochondrial changes; viral process; regulation of insulin secretion; generation of precursor metabolites and energy; adenine transport; ATP transport; mitochondrial genome maintenance; ADP transport; negative regulation of necroptotic process	transmembrane transporter activity; protein binding; ATP:ADP antiporter activity; adenine transmembrane transporter activity	membrane; integral component of membrane; mitochondrion; mitochondrial inner membrane; integral component of plasma membrane; integral component of mitochondrial membrane
TNNI1	8.98739e-09	-0.127819	0.047	0.108	0.000328948	skeletal muscle contraction; muscle filament sliding; cardiac muscle contraction; muscle contraction; regulation of striated muscle contraction; transition between fast and slow fiber; ventricular cardiac muscle tissue morphogenesis	metal ion binding; actin binding; protein binding	troponin complex; cytosol
ILF3-DT	9.09011e-09	-0.195044	0.386	0.497	0.000332707
GABRA3	9.44215e-09	-0.107792	0.093	0.174	0.000345592	ion transport; chloride transport; gamma-aminobutyric acid signaling pathway; ion transmembrane transport; signal transduction; chemical synaptic transmission; regulation of membrane potential; nervous system process; chloride transmembrane transport; synaptic transmission, GABAergic; regulation of postsynaptic membrane potential	ion channel activity; transmembrane signaling receptor activity; chloride channel activity; GABA-A receptor activity; extracellular ligand-gated ion channel activity; protein binding; transmitter-gated ion channel activity involved in regulation of postsynaptic membrane potential; benzodiazepine receptor activity; inhibitory extracellular ligand-gated ion channel activity; GABA-gated chloride ion…	membrane; integral component of membrane; plasma membrane; cell junction; synapse; postsynaptic membrane; chloride channel complex; integral component of plasma membrane; neuron projection; postsynapse; dendrite membrane; GABA-A receptor complex; GABA-ergic synapse; integral component of postsynaptic specialization membrane
PHC2	9.53755e-09	0.236927	0.408	0.307	0.000349084	multicellular organism development; spermatogenesis	zinc ion binding; metal ion binding; DNA binding; protein binding; identical protein binding	nucleus; nucleoplasm; PcG protein complex; PRC1 complex; heterochromatin
STMP1	9.56581e-09	0.221562	0.77	0.721	0.000350118			membrane; integral component of membrane; mitochondrion; mitochondrial membrane; mitochondrial respirasome
TSC22D3	1.0316e-08	-0.13951	0.255	0.367	0.000377577	regulation of transcription, DNA-templated; regulation of transcription by RNA polymerase II; ion transmembrane transport; response to osmotic stress; negative regulation of activation-induced cell death of T cells	DNA-binding transcription factor activity; DNA-binding transcription factor activity, RNA polymerase II-specific	nucleus; cytoplasm; cytosol
ERLEC1	1.04737e-08	-0.190563	0.492	0.595	0.000383349	transmembrane transport; ubiquitin-dependent ERAD pathway; ERAD pathway; retrograde protein transport, ER to cytosol; negative regulation of retrograde protein transport, ER to cytosol	protein binding; unfolded protein binding	endoplasmic reticulum; endoplasmic reticulum lumen; endoplasmic reticulum quality control compartment
RPL38	1.07085e-08	-0.168626	0.988	0.995	0.000391944	translation; cytoplasmic translation; viral transcription; translational initiation; nuclear-transcribed mRNA catabolic process, nonsense-mediated decay; SRP-dependent cotranslational protein targeting to membrane; skeletal system development; ossification; regulation of translation; sensory perception of sound; 90S preribosome assembly; middle ear morphogenesis; axial mesoderm development	structural constituent of ribosome; RNA binding	ribosome; focal adhesion; cytosolic large ribosomal subunit; cytosol; postsynaptic density; polysomal ribosome; intracellular; eukaryotic 80S initiation complex; synapse
SCN3A	1.10156e-08	-0.199431	0.463	0.574	0.000403182	transmembrane transport; ion transport; regulation of ion transmembrane transport; sodium ion transport; neuronal action potential; membrane depolarization during action potential; sodium ion transmembrane transport; ion transmembrane transport	ion channel activity; voltage-gated ion channel activity; sodium channel activity; voltage-gated sodium channel activity; protein binding	membrane; integral component of membrane; plasma membrane; voltage-gated sodium channel complex; axon; cytoplasm
PDS5B	1.11526e-08	-0.222025	0.456	0.57	0.000408196	cell division; cell cycle; DNA repair; mitotic sister chromatid cohesion; negative regulation of cell population proliferation; cell population proliferation; regulation of cell population proliferation; lens development in camera-type eye; neuroblast migration	protein binding; DNA binding	nucleus; nucleoplasm; cytosol; chromatin; chromosome, centromeric region; chromosome
NEO1	1.14756e-08	-0.163939	0.229	0.334	0.000420017	nervous system development; cell adhesion; axon guidance; iron ion homeostasis; positive regulation of BMP signaling pathway	protein binding; signaling receptor activity; co-receptor binding	membrane; integral component of membrane; Golgi apparatus; integral component of plasma membrane; nucleoplasm; plasma membrane; plasma membrane protein complex
AC010615.2	1.17573e-08	0.156956	0.125	0.055	0.000430328
MYO10	1.19196e-08	0.280548	0.334	0.24	0.000436268	signal transduction; Fc-gamma receptor signaling pathway involved in phagocytosis; regulation of cell shape; cytoskeleton-dependent intracellular transport; regulation of filopodium assembly; positive regulation of cell-cell adhesion	nucleotide binding; ATP binding; motor activity; actin binding; protein binding; calmodulin binding; actin filament binding; phosphatidylinositol-3,4,5-trisphosphate binding; spectrin binding; actin-dependent ATPase activity; plus-end directed microfilament motor activity	cytoplasm; membrane; nucleolus; cytosol; myosin complex; plasma membrane; cytoskeleton; cell projection; lamellipodium; cell cortex; ruffle; filopodium membrane; filopodium tip; filopodium; neuron projection; neuronal cell body
MAPK12	1.23269e-08	0.157341	0.171	0.089	0.000451176	protein phosphorylation; phosphorylation; MAPK cascade; cell cycle; intracellular signal transduction; regulation of gene expression; signal transduction; muscle organ development; peptidyl-serine phosphorylation; cell cycle arrest; positive regulation of muscle cell differentiation; myoblast differentiation; DNA damage induced protein phosphorylation; positive regulation of peptidase activity; n…	nucleotide binding; protein kinase activity; protein serine/threonine kinase activity; ATP binding; kinase activity; transferase activity; MAP kinase activity; metal ion binding; protein binding; magnesium ion binding	nucleus; cytoplasm; mitochondrion; nucleoplasm; cytosol
BAALC	1.24054e-08	-0.102374	0.145	0.241	0.000454051			cytoplasm; membrane; nucleus; cytosol; plasma membrane; cell junction; synapse; postsynaptic membrane; membrane raft; postsynaptic density; neuron projection
TAGLN2	1.29244e-08	-0.112605	0.086	0.163	0.000473047	platelet degranulation; epithelial cell differentiation	protein binding; cadherin binding	extracellular region; cytosol; extracellular exosome; vesicle
IDH1	1.30586e-08	0.235171	0.562	0.467	0.000477959	oxidation-reduction process; tricarboxylic acid cycle; protein targeting to peroxisome; neutrophil degranulation; isocitrate metabolic process; glyoxylate cycle; 2-oxoglutarate metabolic process; NADP metabolic process; NADPH regeneration; glutathione metabolic process; response to oxidative stress; female gonad development; response to organic cyclic compound; response to steroid hormone; regula…	metal ion binding; magnesium ion binding; oxidoreductase activity; protein homodimerization activity; oxidoreductase activity, acting on the CH-OH group of donors, NAD or NADP as acceptor; NAD binding; identical protein binding; cadherin binding; isocitrate dehydrogenase (NADP+) activity; isocitrate dehydrogenase activity; NADP binding	cytoplasm; cytosol; extracellular region; peroxisome; mitochondrion; extracellular exosome; peroxisomal matrix; secretory granule lumen; ficolin-1-rich granule lumen; tertiary granule lumen
PNN	1.34078e-08	0.228508	0.865	0.842	0.000490739	mRNA processing; RNA splicing; mRNA splicing, via spliceosome; cell adhesion	RNA binding; DNA binding; protein binding; structural molecule activity	nucleus; nuclear speck; membrane; spliceosomal complex; cell junction; catalytic step 2 spliceosome; plasma membrane; exon-exon junction complex; cell-cell junction; desmosome; intermediate filament
DSTN	1.48999e-08	-0.187173	0.839	0.898	0.000545351	actin filament severing; actin filament depolymerization; positive regulation of actin filament depolymerization; actin polymerization or depolymerization; actin filament fragmentation	actin binding; protein binding; actin filament binding	actin cytoskeleton; extracellular exosome; cytoplasm; cortical actin cytoskeleton; intracellular
CASC3	1.50158e-08	-0.166386	0.323	0.44	0.000549594	mRNA processing; RNA splicing; mRNA transport; mRNA splicing, via spliceosome; regulation of translation; mRNA export from nucleus; RNA export from nucleus; mRNA 3'-end processing; nuclear-transcribed mRNA catabolic process, nonsense-mediated decay; intracellular mRNA localization	RNA binding; protein binding; ubiquitin protein ligase binding; enzyme binding; identical protein binding	exon-exon junction complex; nucleus; cytoplasm; nuclear speck; nuclear membrane; cell projection; spliceosomal complex; perinuclear region of cytoplasm; dendrite; nucleoplasm; cytosol; cytoplasmic stress granule; cytoplasmic ribonucleoprotein granule; U2-type catalytic step 1 spliceosome; ribonucleoprotein complex
DOCK4	1.52903e-08	-0.123084	0.129	0.216	0.00055964	small GTPase mediated signal transduction; positive regulation of GTPase activity; positive regulation of vascular associated smooth muscle cell migration; cell chemotaxis; negative regulation of vascular smooth muscle contraction	guanyl-nucleotide exchange factor activity; GTPase activator activity; protein binding; SH3 domain binding; receptor tyrosine kinase binding; PDZ domain binding; Rac GTPase binding	cytoplasm; membrane; Golgi apparatus; nucleolus; cytosol; plasma membrane; cell projection; stereocilium; stereocilium bundle
RNMT	1.56084e-08	-0.186316	0.76	0.828	0.000571283	mRNA processing; methylation; 7-methylguanosine mRNA capping; RNA 5'-cap (guanine-N7)-methylation; transcription by RNA polymerase II; cellular response to leukemia inhibitory factor	RNA binding; transferase activity; methyltransferase activity; protein binding; mRNA (guanine-N7-)-methyltransferase activity	nucleus; nucleoplasm; fibrillar center; mRNA cap binding complex; receptor complex; mRNA cap methyltransferase complex
TNNT1	1.56255e-08	-0.158128	0.051	0.111	0.000571909	regulation of muscle contraction; skeletal muscle contraction; muscle filament sliding; cardiac muscle contraction; sarcomere organization; muscle contraction; negative regulation of muscle contraction; transition between fast and slow fiber; slow-twitch skeletal muscle fiber contraction	protein binding; calcium ion binding; tropomyosin binding; calcium-dependent ATPase activity; troponin T binding	troponin complex; cytosol
SGCB	1.58898e-08	0.247361	0.439	0.345	0.000581581	muscle organ development; muscle fiber development; cardiac muscle cell development; vascular smooth muscle cell development	protein binding	cytoplasm; membrane; integral component of membrane; plasma membrane; cytoskeleton; sarcoglycan complex; sarcolemma; integral component of plasma membrane; dystrophin-associated glycoprotein complex; dystroglycan complex
RPL6	1.621e-08	0.173536	0.999	0.999	0.000593303	translation; cytoplasmic translation; ribosomal large subunit assembly; viral transcription; translational initiation; regulation of transcription, DNA-templated; nuclear-transcribed mRNA catabolic process, nonsense-mediated decay; SRP-dependent cotranslational protein targeting to membrane	RNA binding; structural constituent of ribosome; cadherin binding; DNA binding	nucleus; cytoplasm; membrane; endoplasmic reticulum; ribosome; cytosol; focal adhesion; cytosolic large ribosomal subunit; cytoplasmic ribonucleoprotein granule; rough endoplasmic reticulum; polysomal ribosome; intracellular; postsynaptic density; synapse
CEBPZ	1.64906e-08	-0.238325	0.553	0.663	0.000603571	ribosome biogenesis; positive regulation of transcription by RNA polymerase II; transcription by RNA polymerase II	RNA binding; DNA-binding transcription factor activity, RNA polymerase II-specific; RNA polymerase II proximal promoter sequence-specific DNA binding; DNA-binding transcription activator activity, RNA polymerase II-specific; DNA binding	nucleus
CHCHD6	1.71385e-08	-0.185875	0.409	0.512	0.000627286	cellular response to DNA damage stimulus; cristae formation	protein binding	membrane; cytosol; mitochondrion; mitochondrial inner membrane; MICOS complex
KLHDC8A	1.78269e-08	0.262012	0.164	0.087	0.000652483		protein binding
GOPC	1.8039e-08	-0.181505	0.596	0.698	0.000660244	protein transport; Golgi to plasma membrane transport; cytoplasmic sequestering of CFTR protein; endoplasmic reticulum to Golgi vesicle-mediated transport; negative regulation of anion channel activity; protein homooligomerization; negative regulation of protein localization to cell surface; apical protein localization	protein binding; ion channel binding	cytoplasm; membrane; Golgi apparatus; plasma membrane; cell projection; Golgi membrane; cell junction; synapse; postsynaptic membrane; dendrite; postsynaptic density; protein-containing complex; trans-Golgi network transport vesicle; lysosomal membrane; Golgi-associated vesicle membrane
CEP85L	1.8504e-08	-0.17516	0.196	0.295	0.000677267			cytoplasm; cytoskeleton; centrosome; microtubule organizing center
EMX2OS	1.8805e-08	-0.120658	0.058	0.121	0.000688283
PCBP4	1.88687e-08	0.324378	0.443	0.359	0.000690614	DNA damage response, signal transduction by p53 class mediator resulting in cell cycle arrest; regulation of mRNA stability	nucleic acid binding; RNA binding; DNA binding; mRNA 3'-UTR binding	cytoplasm; cytosol
ERC1	1.90985e-08	-0.193034	0.293	0.401	0.000699024	protein transport; negative regulation of apoptotic process; multicellular organism development; positive regulation of NF-kappaB transcription factor activity; regulation of transcription, DNA-templated; I-kappaB phosphorylation; retrograde transport, endosome to Golgi	protein binding; cadherin binding; Rab GTPase binding; leucine zipper domain binding; PDZ domain binding	cytoplasm; membrane; Golgi apparatus; cytoskeleton; Golgi membrane; centrosome; microtubule organizing center; ciliary basal body; presynaptic membrane; IkappaB kinase complex; synapse
NLGN1	1.92907e-08	-0.144788	0.118	0.202	0.000706059	cell adhesion; rhythmic process; synapse organization; modulation of chemical synaptic transmission; nervous system development; protein targeting; positive regulation of filopodium assembly; synaptic vesicle endocytosis; positive regulation of synapse assembly; positive regulation of intracellular signal transduction; heterophilic cell-cell adhesion via plasma membrane cell adhesion molecules; s…	neurexin family protein binding; signaling receptor activity; amyloid-beta binding; PDZ domain binding; scaffold protein binding; cell adhesion molecule binding; protein dimerization activity	membrane; integral component of membrane; integral component of plasma membrane; presynapse; plasma membrane; cell junction; synapse; postsynaptic membrane; cell surface; postsynaptic density; excitatory synapse; receptor complex; dendritic spine; Golgi apparatus; dendrite; postsynapse; spanning component of membrane; asymmetric, glutamatergic, excitatory synapse; external side of plasma membrane…
EXOSC5	1.97584e-08	-0.14029	0.119	0.201	0.000723177	RNA phosphodiester bond hydrolysis, exonucleolytic; rRNA processing; regulation of mRNA stability; exonucleolytic catabolism of deadenylated mRNA; defense response to virus; rRNA catabolic process; polyadenylation-dependent snoRNA 3'-end processing; nuclear-transcribed mRNA catabolic process, exonucleolytic, 3'-5'; U4 snRNA 3'-end processing; nuclear mRNA surveillance; DNA deamination; RNA catabo…	RNA binding; protein binding; 3'-5'-exoribonuclease activity	nucleus; cytoplasm; nucleolus; nucleoplasm; cytosol; exosome (RNase complex); transcriptionally active chromatin; nuclear exosome (RNase complex); cytoplasmic exosome (RNase complex)
FAM217B	1.98839e-08	-0.206292	0.392	0.505	0.000727771			cytosol; nucleoplasm
GPI	2.06163e-08	-0.226424	0.445	0.553	0.000754578	glycolytic process; gluconeogenesis; in utero embryonic development; mesoderm formation; carbohydrate metabolic process; learning or memory; methylglyoxal biosynthetic process; response to estradiol; response to progesterone; response to testosterone; erythrocyte homeostasis; response to immobilization stress; response to muscle stretch; glucose homeostasis; negative regulation of cysteine-type e…	glucose-6-phosphate isomerase activity; isomerase activity; intramolecular transferase activity; monosaccharide binding; growth factor activity; cytokine activity; ubiquitin protein ligase binding	cytoplasm; cytosol; plasma membrane; neuron projection; ciliary membrane; membrane; nucleoplasm; extracellular space; extracellular region; extracellular exosome; secretory granule lumen; ficolin-1-rich granule lumen
TCF12	2.07573e-08	0.303424	0.375	0.281	0.00075974	multicellular organism development; positive regulation of gene expression; positive regulation of neuron differentiation; positive regulation of transcription, DNA-templated; positive regulation of transcription by RNA polymerase II; cell differentiation; nervous system development; regulation of hematopoietic stem cell differentiation; immune response; regulation of transcription by RNA polymer…	transcription regulatory region DNA binding; protein dimerization activity; DNA binding; protein binding; cAMP response element binding; protein heterodimerization activity; E-box binding; HMG box domain binding; DNA-binding transcription factor activity; RNA polymerase II proximal promoter sequence-specific DNA binding; DNA-binding transcription factor activity, RNA polymerase II-specific; DNA-b…	cytoplasm; nucleus; nuclear speck; intracellular membrane-bounded organelle; nucleoplasm; transcription factor complex; nuclear chromatin; RNA polymerase II transcription factor complex
SNX7	2.10337e-08	-0.109435	0.057	0.119	0.000769855	protein transport	phosphatidylinositol binding; protein binding; lipid binding	membrane; cytoplasmic vesicle; cytoplasmic vesicle membrane
SNHG14	2.18448e-08	-0.224908	0.926	0.927	0.000799543
KCNQ2	2.23987e-08	0.23577	0.413	0.314	0.000819816	transmembrane transport; ion transport; potassium ion transport; regulation of ion transmembrane transport; potassium ion transmembrane transport; nervous system development; chemical synaptic transmission	ion channel activity; voltage-gated ion channel activity; voltage-gated potassium channel activity; potassium channel activity; delayed rectifier potassium channel activity; calmodulin binding; protein binding; ankyrin binding	membrane; integral component of membrane; voltage-gated potassium channel complex; plasma membrane; integral component of plasma membrane; node of Ranvier; axon initial segment
SLC3A2	2.34481e-08	-0.231903	0.52	0.623	0.000858222	carbohydrate metabolic process; sodium ion transmembrane transport; calcium ion transport; amino acid transport; leukocyte migration; response to exogenous dsRNA; tryptophan transport; L-alpha-amino acid transmembrane transport; L-leucine import across plasma membrane	RNA binding; catalytic activity; protein binding; cadherin binding; double-stranded RNA binding; neutral amino acid transmembrane transporter activity; calcium:sodium antiporter activity	membrane; integral component of membrane; nucleus; cytosol; lysosomal membrane; plasma membrane; melanosome; cell junction; cell surface; lysosome; extracellular exosome; apical plasma membrane; amino acid transport complex; synapse
NIN	2.34902e-08	0.159785	0.217	0.127	0.000859766	microtubule anchoring at centrosome; protein localization; centriole-centriole cohesion; centrosome localization; centrosome-templated microtubule nucleation; corpus callosum morphogenesis; corticospinal tract morphogenesis; positive regulation of microtubule polymerization; collateral sprouting; positive regulation of axonogenesis	calcium ion binding; nucleotide binding; GTP binding; protein binding; kinase binding	centrosome; cytoplasm; nucleus; nucleolus; cytoskeleton; microtubule; microtubule organizing center; centriole; mitotic spindle; centriolar subdistal appendage; ciliary transition fiber; spindle pole; microtubule minus-end; pericentriolar material; mitotic spindle pole; plasma membrane; axon; dendrite; axonal growth cone; apical part of cell
SCGN	2.3893e-08	0.44719	0.132	0.061	0.000874506	regulation of presynaptic cytosolic calcium ion concentration; regulation of long-term synaptic potentiation	metal ion binding; calcium ion binding	cytoplasm; membrane; presynapse; extracellular region; cytoplasmic vesicle; nucleus; cytosol; neuron projection; synapse; dendrite; transport vesicle membrane
EPHA3	2.39638e-08	-0.11816	0.137	0.227	0.000877098	protein phosphorylation; phosphorylation; cell adhesion; transmembrane receptor protein tyrosine kinase signaling pathway; peptidyl-tyrosine phosphorylation; ephrin receptor signaling pathway; axon guidance; regulation of microtubule cytoskeleton organization; regulation of actin cytoskeleton organization; cell migration; regulation of epithelial to mesenchymal transition; regulation of GTPase ac…	nucleotide binding; protein kinase activity; ATP binding; kinase activity; transferase activity; protein tyrosine kinase activity; transmembrane receptor protein tyrosine kinase activity; ephrin receptor activity; protein binding; transmembrane-ephrin receptor activity; GPI-linked ephrin receptor activity	membrane; integral component of membrane; integral component of plasma membrane; plasma membrane; extracellular region; early endosome; receptor complex; neuron projection
CNR1	2.45732e-08	-0.18588	0.151	0.243	0.000899405	G protein-coupled receptor signaling pathway; signal transduction; induction of synaptic vesicle exocytosis by positive regulation of presynaptic cytosolic calcium ion concentration; G protein-coupled receptor signaling pathway, coupled to cyclic nucleotide second messenger; positive regulation of acute inflammatory response to antigenic stimulus; adenylate cyclase-modulating G protein-coupled re…	G protein-coupled receptor activity; protein binding; cannabinoid receptor activity; drug binding; voltage-gated calcium channel activity involved in positive regulation of presynaptic cytosolic calcium levels	membrane; integral component of membrane; mitochondrion; plasma membrane; cell projection; mitochondrial outer membrane; membrane raft; axon; integral component of plasma membrane; growth cone; integral component of mitochondrial membrane; presynaptic membrane; intracellular membrane-bounded organelle; presynapse; glutamatergic synapse; GABA-ergic synapse; integral component of presynaptic membra…
MTUS1	2.50386e-08	-0.175836	0.276	0.383	0.000916436	regulation of macrophage chemotaxis	microtubule binding	nucleus; cytoplasm; membrane; nucleolus; Golgi apparatus; mitochondrion; extracellular space; plasma membrane; microtubule cytoskeleton; cytoskeleton; microtubule; microtubule organizing center; spindle
ANK2	2.52104e-08	-0.174874	0.594	0.69	0.000922726	signal transduction; positive regulation of gene expression; protein stabilization; regulation of cardiac muscle contraction by regulation of the release of sequestered calcium ion; regulation of ventricular cardiac muscle cell membrane repolarization; regulation of heart rate; protein transport; cytoskeleton organization; endocytosis; endoplasmic reticulum to Golgi vesicle-mediated transport; pr…	protein binding; ion channel binding; enzyme binding; ATPase binding; protein kinase binding; protein binding, bridging; phosphorylation-dependent protein binding; spectrin binding; structural constituent of cytoskeleton	cytoplasm; membrane; mitochondrion; plasma membrane; cytoskeleton; cell junction; synapse; postsynaptic membrane; lysosome; endosome; early endosome; cytosol; basolateral plasma membrane; recycling endosome; M band; apical plasma membrane; Z disc; T-tubule; sarcolemma; axon initial segment; intercalated disc; A band; costamere; neuron projection; membrane raft
HSPH1	2.55271e-08	-0.216991	0.465	0.571	0.000934316	regulation of catalytic activity; receptor-mediated endocytosis; regulation of cellular response to heat; response to unfolded protein; positive regulation of NK T cell activation; positive regulation of MHC class I biosynthetic process; chaperone cofactor-dependent protein refolding	nucleotide binding; ATP binding; protein binding; adenyl-nucleotide exchange factor activity; alpha-tubulin binding	cytoplasm; cytosol; nucleoplasm; extracellular region; nucleus; extracellular exosome; protein-containing complex; endocytic vesicle lumen; microtubule
ID3	2.56218e-08	-0.216936	0.057	0.118	0.000937782	negative regulation of transcription, DNA-templated; rhythmic process; neuron differentiation; muscle organ development; regulation of cell cycle; circadian rhythm; multicellular organism development; negative regulation of DNA binding; negative regulation of DNA-binding transcription factor activity; negative regulation of neuron differentiation; negative regulation of transcription by RNA polym…	protein dimerization activity; protein binding; DNA-binding transcription factor activity; DNA-binding transcription factor activity, RNA polymerase II-specific; transcription factor binding; transcription corepressor activity; RNA polymerase II transcription factor binding; protein domain specific binding; leptomycin B binding	nucleus; cytoplasm
ATCAY	2.63059e-08	-0.17629	0.593	0.702	0.000962821	nervous system development; neuron projection development; mitochondrion distribution; apoptotic process; regulation of protein localization; polyphosphate catabolic process; negative regulation of glutamate metabolic process	protein binding; kinesin binding; exopolyphosphatase activity	cytoplasm; membrane; integral component of membrane; cell projection; cell junction; synapse; dendrite; mitochondrial membrane; axon; neuron projection; neuron projection terminus; perinuclear region of cytoplasm
AKAP11	2.63989e-08	-0.173894	0.31	0.417	0.000966226	intracellular signal transduction; protein localization	protein binding; protein kinase A binding; protein phosphatase 1 binding	cytoplasm; nucleolus; cytosol; plasma membrane; cytoskeleton; microtubule organizing center; peroxisome
TCP1	2.64388e-08	-0.209021	0.76	0.838	0.000967687	protein stabilization; protein folding; tubulin complex assembly; interleukin-12-mediated signaling pathway; positive regulation of telomere maintenance via telomerase; positive regulation of telomerase activity; scaRNA localization to Cajal body; positive regulation of establishment of protein localization to telomere; positive regulation of protein localization to Cajal body; positive regulatio…	RNA binding; nucleotide binding; ATP binding; protein binding; unfolded protein binding; ubiquitin protein ligase binding	cytoplasm; cytosol; cytoskeleton; microtubule; microtubule organizing center; extracellular exosome; centrosome; pericentriolar material; heterochromatin; acrosomal vesicle; zona pellucida receptor complex; nuclear heterochromatin; Golgi apparatus; chaperonin-containing T-complex; cell body
PXMP2	2.65481e-08	0.203291	0.243	0.156	0.000971688		protein binding	cytoplasm; membrane; integral component of membrane; peroxisome; peroxisomal membrane; protein-containing complex
CEP295	2.73905e-08	-0.186487	0.198	0.293	0.00100252	positive regulation of protein acetylation; positive regulation of centriole elongation; positive regulation of establishment of protein localization; regulation of centriole replication; positive regulation of centrosome duplication	microtubule binding	cytoplasm; cytosol; plasma membrane; cytoskeleton; centrosome; microtubule organizing center; spindle; centriole; mitotic spindle microtubule
HILPDA	2.81712e-08	-0.202587	0.218	0.317	0.00103109	positive regulation of cell population proliferation; positive regulation of cytokine production; lipid droplet organization; cellular response to hypoxia; positive regulation of lipid storage; autocrine signaling	protein binding; signaling receptor binding	extracellular space; membrane; integral component of membrane; nucleoplasm; lipid droplet; extracellular region; cytosol; cell surface; secretory granule
SH3GL3	2.90833e-08	-0.154226	0.174	0.266	0.00106448	endocytosis; signal transduction; central nervous system development; positive regulation of neuron differentiation; negative regulation of clathrin-dependent endocytosis; regulation of clathrin-dependent endocytosis	protein binding; lipid binding; identical protein binding; protein C-terminus binding	cytoplasm; membrane; endosome; early endosome membrane; acrosomal vesicle; early endosome; synapse; presynapse; postsynaptic endosome; glutamatergic synapse; postsynaptic density, intracellular component
LRFN4	2.91544e-08	-0.140933	0.237	0.345	0.00106708	regulation of postsynaptic density assembly; synaptic membrane adhesion; regulation of presynapse assembly	protein binding	membrane; integral component of membrane; cell surface; glutamatergic synapse; GABA-ergic synapse; integral component of postsynaptic density membrane; plasma membrane
C5orf24	2.99152e-08	-0.179822	0.51	0.616	0.00109493		protein binding
LYRM7	2.99623e-08	-0.153938	0.215	0.319	0.00109665	cellular respiration; mitochondrial respiratory chain complex III assembly	protein binding	mitochondrion; mitochondrial matrix; mitochondrial membrane
CCPG1	3.12291e-08	-0.195692	0.395	0.507	0.00114301	regulation of Rho guanyl-nucleotide exchange factor activity; cell cycle; positive regulation of cell population proliferation; positive regulation of cell cycle; positive regulation of transcription by RNA polymerase II	protein binding	membrane; integral component of membrane
ARHGAP21	3.18374e-08	-0.213964	0.629	0.732	0.00116528	signal transduction; positive regulation of GTPase activity; regulation of small GTPase mediated signal transduction; Golgi organization; establishment of Golgi localization; organelle transport along microtubule; maintenance of Golgi location	protein binding; GTPase activator activity	cytoplasm; membrane; Golgi apparatus; plasma membrane; cell junction; actin cytoskeleton; cytoskeleton; Golgi membrane; cytoplasmic vesicle; cytoplasmic vesicle membrane; cytosol
ABCA5	3.30471e-08	-0.123317	0.14	0.229	0.00120956	transmembrane transport; cholesterol transport; cholesterol efflux; lipid transport; high-density lipoprotein particle remodeling; reverse cholesterol transport; negative regulation of macrophage derived foam cell differentiation	nucleotide binding; ATP binding; ATPase activity; ATPase-coupled transmembrane transporter activity; lipid transporter activity	membrane; integral component of membrane; Golgi apparatus; lysosomal membrane; Golgi membrane; lysosome; endosome; late endosome membrane; intracellular membrane-bounded organelle; late endosome
TMEM158	3.30839e-08	-0.156709	0.176	0.27	0.0012109		peptide binding	membrane; integral component of membrane
NT5C	3.37963e-08	0.185377	0.263	0.169	0.00123698	dephosphorylation; deoxyribonucleotide catabolic process; nucleotide metabolic process; purine nucleotide catabolic process; pyrimidine nucleoside catabolic process; pyrimidine deoxyribonucleotide catabolic process	5'-nucleotidase activity; metal ion binding; nucleotide binding; hydrolase activity; nucleotidase activity; pyrimidine nucleotide binding; phosphatase activity	nucleus; cytoplasm; cytosol; extracellular exosome
GCA	3.49371e-08	-0.191101	0.263	0.365	0.00127873	neutrophil degranulation; membrane fusion	calcium ion binding; metal ion binding; protein homodimerization activity; protein binding; protein heterodimerization activity	cytosol; plasma membrane; cytoplasm; membrane; extracellular region; extracellular exosome; azurophil granule lumen
BTBD8	3.69164e-08	-0.192706	0.405	0.517	0.00135118	clathrin-dependent synaptic vesicle endocytosis; endocytosis; neuron projection development; synaptic vesicle recycling via endosome	protein binding	nucleoplasm; presynapse; nucleus; membrane; plasma membrane; cell projection; cell junction; cytoplasmic vesicle; synapse; clathrin-coated vesicle; axon; presynaptic membrane; cell body; synaptic vesicle; AP-2 adaptor complex; neuron projection terminus; cell
ZC2HC1A	3.74565e-08	-0.202803	0.75	0.823	0.00137094		metal ion binding; protein binding
PRMT2	3.80389e-08	-0.184058	0.663	0.762	0.00139226	methylation; protein methylation; positive regulation of transcription, DNA-templated; negative regulation of NF-kappaB transcription factor activity; positive regulation of apoptotic process; signal transduction; negative regulation of transcription, DNA-templated; peptidyl-arginine N-methylation; negative regulation of G1/S transition of mitotic cell cycle; developmental cell growth; regulation…	transferase activity; methyltransferase activity; protein homodimerization activity; protein binding; transcription coactivator activity; estrogen receptor binding; retinoic acid receptor binding; protein-containing complex binding; protein-arginine N-methyltransferase activity; androgen receptor binding; histone methyltransferase activity; peroxisome proliferator activated receptor binding; thyr…	nucleus; cytoplasm; cytosol; nucleoplasm; nucleolus
COQ7	3.81051e-08	-0.175322	0.261	0.365	0.00139468	oxidation-reduction process; ubiquinone biosynthetic process; regulation of gene expression; regulation of reactive oxygen species metabolic process; determination of adult lifespan	metal ion binding; monooxygenase activity; oxidoreductase activity; protein binding; oxidoreductase activity, acting on paired donors, with incorporation or reduction of molecular oxygen, NAD(P)H as one donor, and incorporation of one atom of oxygen; 2-octoprenyl-3-methyl-6-methoxy-1,4-benzoquinone hydroxylase activity	membrane; mitochondrial inner membrane; mitochondrion; nucleus; extrinsic component of mitochondrial inner membrane
STRAP	3.90685e-08	0.209644	0.811	0.762	0.00142995	mRNA processing; RNA splicing; spliceosomal snRNP assembly; negative regulation of epithelial cell proliferation; negative regulation of transforming growth factor beta receptor signaling pathway; negative regulation of epithelial to mesenchymal transition; negative regulation of pathway-restricted SMAD protein phosphorylation; maintenance of gastrointestinal epithelium; negative regulation of ep…	RNA binding; protein binding; signaling receptor binding	nucleus; cytoplasm; cytosol; nucleoplasm; SMN complex; SMN-Sm protein complex
FAM3C	3.93509e-08	-0.233439	0.425	0.515	0.00144028	signal transduction; multicellular organism development; negative regulation of gluconeogenesis; platelet degranulation	protein binding; cytokine activity	Golgi apparatus; extracellular region; cytoplasmic vesicle; extracellular exosome; platelet dense granule lumen
RPS23	3.99475e-08	0.156539	0.998	0.995	0.00146212	translation; cytoplasmic translation; viral transcription; translational initiation; stress granule assembly; nuclear-transcribed mRNA catabolic process, nonsense-mediated decay; SRP-dependent cotranslational protein targeting to membrane; maintenance of translational fidelity	RNA binding; structural constituent of ribosome; protein binding	cytoplasm; membrane; endoplasmic reticulum; cytosol; ribosome; small ribosomal subunit; cytosolic small ribosomal subunit; nucleoplasm; rough endoplasmic reticulum; polysomal ribosome; synapse
AC027031.2	4.06158e-08	-0.258491	0.261	0.371	0.00148658
HMGXB4	4.2462e-08	-0.180824	0.508	0.629	0.00155415	Wnt signaling pathway; endosome to lysosome transport; negative regulation of Wnt signaling pathway	DNA binding	nucleus; NURF complex
TMA7	4.25749e-08	0.160239	0.93	0.923	0.00155828	cytoplasmic translation
SYNPR	4.27584e-08	0.358215	0.196	0.117	0.001565	regulation of neuronal synaptic plasticity	protein binding; syntaxin-1 binding	membrane; integral component of membrane; synaptic vesicle; cell junction; cytoplasmic vesicle; synapse; neuron projection; synaptic vesicle membrane; integral component of synaptic vesicle membrane
EEF2	4.29083e-08	0.146816	0.971	0.963	0.00157049	translation; translational elongation; positive regulation of translation; hematopoietic progenitor cell differentiation; response to ischemia; skeletal muscle contraction; aging; glial cell proliferation; response to estradiol; response to endoplasmic reticulum stress; skeletal muscle cell differentiation; response to drug; response to hydrogen peroxide; response to ethanol; response to folic ac…	RNA binding; nucleotide binding; GTPase activity; GTP binding; protein binding; translation elongation factor activity; p53 binding; 5S rRNA binding; ribosome binding; actin filament binding; cadherin binding; protein kinase binding	nucleus; cytoplasm; membrane; cytosol; plasma membrane; aggresome; extracellular region; polysome; polysomal ribosome; membrane raft; synapse; ribonucleoprotein complex; extracellular exosome; secretory granule lumen; ficolin-1-rich granule lumen
RAI14	4.50258e-08	0.210912	0.171	0.094	0.00164799	cell differentiation; spermatogenesis	actin binding; protein binding	nucleus; cytoplasm; cytosol; fibrillar center; cytoskeleton; cell junction; cell cortex
NAP1L2	4.65242e-08	-0.10133	0.131	0.218	0.00170283	nucleosome assembly; positive regulation of histone acetylation; positive regulation of neuron differentiation; positive regulation of histone H3-K14 acetylation; regulation of stem cell division; positive regulation of histone H3-K9 acetylation	protein binding; chromatin binding; histone binding	nucleus
CCND1	4.6935e-08	0.275	0.16	0.083	0.00171787	positive regulation of protein phosphorylation; cell division; cellular response to DNA damage stimulus; cell cycle; regulation of cyclin-dependent protein serine/threonine kinase activity; negative regulation of transcription by RNA polymerase II; negative regulation of cell cycle arrest; transcription initiation from RNA polymerase II promoter; positive regulation of G2/M transition of mitotic …	protein binding; transcription corepressor activity; protein kinase binding; enzyme binding; transcription factor binding; proline-rich region binding; histone deacetylase binding; protein kinase activity; cyclin-dependent protein serine/threonine kinase regulator activity; kinase activity; protein-containing complex binding	nucleus; cytoplasm; membrane; nucleoplasm; cytosol; nuclear membrane; intracellular; transcriptional repressor complex; cyclin-dependent protein kinase holoenzyme complex; bicellular tight junction
ENY2	4.7117e-08	0.195421	0.798	0.763	0.00172453	positive regulation of transcription, DNA-templated; mRNA export from nucleus; mRNA transport; protein transport; chromatin organization; transcription elongation from RNA polymerase II promoter; histone deubiquitination; regulation of transcription by RNA polymerase II; poly(A)+ mRNA export from nucleus; negative regulation of insulin secretion involved in cellular response to glucose stimulus	transcription coactivator activity; nuclear receptor transcription coactivator activity; protein binding; chromatin binding	nuclear pore; SAGA complex; nucleus; nucleoplasm; mitochondrion; transcription export complex 2; DUBm complex; nuclear pore nuclear basket
RAB3C	5.44595e-08	-0.192539	0.327	0.429	0.00199327	protein transport; intracellular protein transport; Rab protein signal transduction; protein secretion; protein localization to plasma membrane; regulation of exocytosis; vesicle docking involved in exocytosis; antigen processing and presentation	nucleotide binding; GTPase activity; GTP binding; protein binding; myosin V binding; GTP-dependent protein binding	membrane; plasma membrane; perinuclear region of cytoplasm; endosome; synaptic vesicle; vesicle; cytosol; anchored component of synaptic vesicle membrane
PRR12	5.49491e-08	-0.117757	0.115	0.196	0.00201119			nucleus; membrane; plasma membrane; cell junction; synapse; postsynaptic membrane; postsynaptic density; neuron projection
KLHL35	5.6191e-08	-0.158337	0.097	0.17	0.00205665		protein binding
WDR17	5.74969e-08	-0.1019	0.115	0.195	0.00210444		protein binding	membrane; integral component of membrane
RPL17	5.80907e-08	0.16935	0.997	0.999	0.00212618	translation; cytoplasmic translation; viral transcription; translational initiation; nuclear-transcribed mRNA catabolic process, nonsense-mediated decay; SRP-dependent cotranslational protein targeting to membrane	RNA binding; structural constituent of ribosome; protein binding	nucleus; ribosome; large ribosomal subunit; cytosolic large ribosomal subunit; cytosol; intracellular
ANKRD37	6.23271e-08	-0.143169	0.123	0.206	0.00228123		protein binding	nucleus; cytoplasm; cytosol; mitochondrion
ACSL4	6.287e-08	-0.168473	0.297	0.408	0.0023011	lipid metabolic process; fatty acid metabolic process; long-chain fatty-acyl-CoA biosynthetic process; long-chain fatty acid metabolic process; positive regulation of insulin secretion; response to nutrient; fatty acid transport; triglyceride biosynthetic process; embryonic process involved in female pregnancy; dendritic spine development; response to interleukin-15	nucleotide binding; ATP binding; catalytic activity; ligase activity; acyl-CoA ligase activity; long-chain fatty acid-CoA ligase activity; very long-chain fatty acid-CoA ligase activity; arachidonate-CoA ligase activity; decanoate-CoA ligase activity	cytoplasm; membrane; integral component of membrane; endoplasmic reticulum; endoplasmic reticulum membrane; organelle membrane; intracellular membrane-bounded organelle; mitochondrion; plasma membrane; mitochondrial outer membrane; peroxisome; peroxisomal membrane; extracellular exosome; lipid droplet; mitochondria-associated endoplasmic reticulum membrane; mitochondrial membrane; neuronal cell b…
MTRNR2L8	6.40387e-08	0.206648	0.288	0.196	0.00234388	negative regulation of signaling receptor activity; negative regulation of execution phase of apoptosis	receptor antagonist activity	cytoplasm; extracellular region
SEC23A	6.47044e-08	0.195678	0.284	0.195	0.00236824	intracellular protein transport; protein transport; endoplasmic reticulum to Golgi vesicle-mediated transport; positive regulation of GTPase activity; vesicle-mediated transport; COPII-coated vesicle budding; antigen processing and presentation of exogenous peptide antigen via MHC class II; COPII vesicle coating; antigen processing and presentation of peptide antigen via MHC class I; COPII-coated…	zinc ion binding; metal ion binding; protein binding; GTPase activator activity	cytoplasm; membrane; endoplasmic reticulum; endoplasmic reticulum membrane; COPII vesicle coat; cytosol; cytoplasmic vesicle; ER to Golgi transport vesicle membrane; endoplasmic reticulum exit site; extrinsic component of membrane; Golgi membrane; COPII-coated ER to Golgi transport vesicle; perinuclear region of cytoplasm
MRPL36	6.49672e-08	-0.175258	0.409	0.518	0.00237787	translation; mitochondrial translational elongation; mitochondrial translational termination; ribosome biogenesis	structural constituent of ribosome	mitochondrion; ribosome; nuclear body; mitochondrial large ribosomal subunit; mitochondrial inner membrane; intracellular
C9orf72	6.50827e-08	-0.142367	0.2	0.296	0.00238209	autophagy; endocytosis; negative regulation of protein phosphorylation; regulation of autophagy; stress granule assembly; regulation of TORC1 signaling; positive regulation of macroautophagy; axon extension; late endosome to lysosome transport; regulation of autophagosome assembly; regulation of actin filament organization; negative regulation of GTP binding	guanyl-nucleotide exchange factor activity; protein binding; Rab guanyl-nucleotide exchange factor activity; Rab GTPase binding	nucleus; cytoplasm; membrane; extracellular space; cell projection; extracellular region; cytoplasmic vesicle; lysosome; dendrite; endosome; autophagosome; P-body; axon; growth cone; perikaryon; axonal growth cone; nuclear membrane; cytoplasmic stress granule; Atg1/ULK1 kinase complex; guanyl-nucleotide exchange factor complex; main axon; neuron projection
BEX1	6.51557e-08	-0.192856	0.869	0.897	0.00238476	positive regulation of DNA-binding transcription factor activity; positive regulation of transcription by RNA polymerase II; multicellular organism development; cell differentiation; nervous system development	protein binding; RNA polymerase II activating transcription factor binding	nucleus; cytoplasm; transcription factor complex
SMIM29	6.6262e-08	-0.196853	0.348	0.453	0.00242525			membrane; integral component of membrane
LGALSL	6.66832e-08	-0.126841	0.223	0.328	0.00244067		carbohydrate binding; protein binding	cytoplasm; intracellular
DCXR	6.83477e-08	0.227361	0.483	0.386	0.00250159	oxidation-reduction process; carbohydrate metabolic process; glucose metabolic process; xylulose metabolic process; NADP metabolic process; protein homotetramerization; glucuronate catabolic process to xylulose 5-phosphate; D-xylose metabolic process	oxidoreductase activity; identical protein binding; oxidoreductase activity, acting on CH-OH group of donors; L-xylulose reductase (NADP+) activity; oxidoreductase activity, acting on NAD(P)H, quinone or similar compound as acceptor; carbonyl reductase (NADPH) activity; L-xylulose reductase (NAD+) activity	nucleus; membrane; plasma membrane; microvillus; brush border; extracellular exosome; cytoplasmic microtubule
TMEM161B-AS1	6.93661e-08	-0.121842	0.778	0.869	0.00253887
PAPOLA	6.95072e-08	-0.196734	0.721	0.775	0.00254403	mRNA processing; RNA 3'-end processing; RNA polyadenylation; mRNA polyadenylation; mRNA 3'-end processing; mRNA splicing, via spliceosome; termination of RNA polymerase II transcription; regulation of mRNA 3'-end processing	RNA binding; metal ion binding; nucleotide binding; ATP binding; transferase activity; nucleotidyltransferase activity; magnesium ion binding; manganese ion binding; polynucleotide adenylyltransferase activity; protein binding	nucleus; cytoplasm; nucleoplasm
GNB5	7.17376e-08	-0.155415	0.326	0.442	0.00262567	signal transduction; G protein-coupled receptor signaling pathway; positive regulation of GTPase activity; protein folding; dopamine receptor signaling pathway; negative regulation of voltage-gated calcium channel activity	GTPase activity; GTPase activator activity; protein binding; chaperone binding; G-protein gamma-subunit binding	membrane; cytosol; nucleus; plasma membrane; presynapse; GTPase activator complex
SLC43A2	7.34977e-08	-0.144874	0.241	0.345	0.00269009	transmembrane transport; amino acid transmembrane transport; amino acid transport; L-amino acid transport; L-alpha-amino acid transmembrane transport; neutral amino acid transport	L-amino acid transmembrane transporter activity; amino acid transmembrane transporter activity; neutral amino acid transmembrane transporter activity	membrane; integral component of membrane; integral component of plasma membrane; plasma membrane
RAB35	7.55896e-08	-0.143908	0.12	0.196	0.00276665	protein transport; Rab protein signal transduction; intracellular protein transport; endosomal transport; protein localization; mitotic cytokinesis; neuron projection development; endocytic recycling; antigen processing and presentation; cellular response to nerve growth factor stimulus; plasma membrane to endosome transport; protein localization to endosome	nucleotide binding; GTPase activity; GTP binding; protein binding; phosphatidylinositol-4,5-bisphosphate binding; GDP binding	membrane; plasma membrane; melanosome; cytoplasmic vesicle; clathrin-coated pit; endosome; clathrin-coated vesicle; cytosol; extracellular exosome; endosome membrane; clathrin-coated vesicle membrane; recycling endosome membrane; intercellular bridge; cell projection membrane; clathrin-coated endocytic vesicle; anchored component of synaptic vesicle membrane
FZD3	7.56201e-08	0.223495	0.782	0.727	0.00276777	signal transduction; cell surface receptor signaling pathway; G protein-coupled receptor signaling pathway; multicellular organism development; Wnt signaling pathway; nervous system development; canonical Wnt signaling pathway; non-canonical Wnt signaling pathway; neuron differentiation; Wnt signaling pathway, planar cell polarity pathway; Wnt signaling pathway, calcium modulating pathway; midbra…	transmembrane signaling receptor activity; G protein-coupled receptor activity; Wnt-activated receptor activity; protein binding; Wnt-protein binding; PDZ domain binding	cytoplasm; membrane; integral component of membrane; plasma membrane; cell surface; apical plasma membrane; lateral plasma membrane; axon; dendrite; filopodium tip; neuronal cell body; apical part of cell; presynaptic active zone
SYN1	7.63886e-08	-0.127018	0.167	0.258	0.0027959	neurotransmitter secretion; chemical synaptic transmission; regulation of neurotransmitter secretion; neuron development; synapse organization; synaptic vesicle clustering; regulation of synaptic vesicle cycle; synaptic vesicle cycle; regulation of synaptic vesicle exocytosis	ATP binding; actin binding; protein binding; protein kinase binding; transporter activity; identical protein binding; calcium-dependent protein binding	Golgi apparatus; synaptic vesicle; cell junction; synapse; synaptic vesicle membrane; cytoskeleton; synaptonemal complex; cytosol; postsynaptic density; axon; dendrite; intracellular organelle; presynaptic active zone; Schaffer collateral - CA1 synapse; presynapse; extrinsic component of synaptic vesicle membrane; anchored component of synaptic vesicle membrane
TRIM16	7.96204e-08	-0.134827	0.217	0.321	0.00291419	positive regulation of transcription, DNA-templated; positive regulation of interleukin-1 beta secretion; histone H4 acetylation; histone H3 acetylation; positive regulation of keratinocyte differentiation; response to retinoic acid; response to organophosphorus; positive regulation of retinoic acid receptor signaling pathway; response to growth hormone; regulation of transcription, DNA-templated	zinc ion binding; metal ion binding; transferase activity; DNA binding; protein binding; interleukin-1 binding; NACHT domain binding; nucleic acid binding	cytoplasm; cytosol; plasma membrane; PML body
YPEL3	8.16978e-08	-0.156172	0.302	0.414	0.00299022	positive regulation of cellular senescence	metal ion binding	nucleus; nucleolus
SLITRK5	8.25914e-08	-0.159267	0.189	0.285	0.00302293	axonogenesis; chemical synaptic transmission; grooming behavior; response to xenobiotic stimulus; striatum development; adult behavior; skin development; dendrite morphogenesis; positive regulation of synapse assembly; cardiovascular system development	protein binding	membrane; integral component of membrane; plasma membrane; receptor complex
NRM	8.26401e-08	0.136816	0.136	0.065	0.00302471		protein binding	membrane; integral component of membrane; nuclear membrane; nucleus; nuclear inner membrane; nuclear envelope
NUBP1	8.42764e-08	0.148771	0.151	0.078	0.0030846	cellular iron ion homeostasis; iron-sulfur cluster assembly; cell projection organization; regulation of cell growth; negative regulation of centrosome duplication; centrosome localization; protein localization to cell cortex	ATP binding; metal ion binding; nucleotide binding; iron-sulfur cluster binding; 4 iron, 4 sulfur cluster binding; protein binding	nucleus; cytoplasm; cytosol; plasma membrane; cytoskeleton; cell projection; microtubule organizing center; cilium; centriole
EIF2S2	8.65232e-08	-0.198952	0.767	0.849	0.00316684	translation; translational initiation; transmembrane transport; formation of translation preinitiation complex; in utero embryonic development; formation of cytoplasmic translation initiation complex; male germ cell proliferation; male gonad development	RNA binding; translation initiation factor activity; metal ion binding; protein binding; mRNA binding; translation initiation factor binding; translation factor activity, RNA binding	cytoplasm; cytosol; eukaryotic translation initiation factor 2 complex
CXXC5	8.71358e-08	0.20855	0.516	0.41	0.00318926	negative regulation of transcription by RNA polymerase II; positive regulation of I-kappaB kinase/NF-kappaB signaling	zinc ion binding; metal ion binding; DNA binding; sequence-specific DNA binding; protein binding; transcription factor binding	nucleus; cytoplasm; cytosol; nucleoplasm
SEC61G	8.9665e-08	-0.205815	0.903	0.938	0.00328183	intracellular protein transport; protein transport; protein targeting; protein transmembrane transport; protein targeting to ER	P-P-bond-hydrolysis-driven protein transmembrane transporter activity; protein binding; protein transmembrane transporter activity	cell; membrane; integral component of membrane; endoplasmic reticulum; endoplasmic reticulum membrane; cytosol
CLSTN3	9.40519e-08	-0.139351	0.222	0.322	0.00344239	cell adhesion; homophilic cell adhesion via plasma membrane adhesion molecules; positive regulation of synaptic transmission; positive regulation of synapse assembly; regulation of cell growth; synapse assembly; synaptic transmission, glutamatergic; synaptic transmission, GABAergic; positive regulation of protein localization to synapse; regulation of presynapse assembly	calcium ion binding	membrane; integral component of membrane; endoplasmic reticulum; endoplasmic reticulum membrane; Golgi apparatus; plasma membrane; Golgi membrane; cell surface; postsynaptic membrane; postsynaptic density; protein-containing complex; glutamatergic synapse; GABA-ergic synapse; integral component of postsynaptic density membrane
GPR155	9.43989e-08	-0.130592	0.155	0.244	0.00345509	transmembrane transport; intracellular signal transduction; cognition		membrane; integral component of membrane; extracellular exosome
ERP29	9.46112e-08	-0.197877	0.65	0.725	0.00346286	protein secretion; positive regulation of gene expression; negative regulation of gene expression; protein unfolding; activation of MAPK activity; positive regulation of protein phosphorylation; protein folding; intracellular protein transport; negative regulation of protein secretion; regulation of endoplasmic reticulum stress-induced intrinsic apoptotic signaling pathway	protein homodimerization activity; chaperone binding	membrane; endoplasmic reticulum; melanosome; endoplasmic reticulum lumen; cell surface; smooth endoplasmic reticulum; transport vesicle
HPCAL1	1.00188e-07	-0.118778	0.14	0.224	0.003667		calcium ion binding; metal ion binding; protein binding	membrane
FAM162A	1.01946e-07	-0.262056	0.4	0.507	0.00373134	apoptotic process; positive regulation of apoptotic process; positive regulation of release of cytochrome c from mitochondria; activation of cysteine-type endopeptidase activity involved in apoptotic process; cellular response to hypoxia; neuron apoptotic process	protein binding	membrane; integral component of membrane; cytosol; mitochondrion
GLUL	1.02348e-07	0.250012	0.441	0.347	0.00374604	nitrogen compound metabolic process; glutamine biosynthetic process; ribosome biogenesis; cell population proliferation; angiogenesis; regulation of protein localization to nucleolus; cellular amino acid biosynthetic process; glutamate catabolic process; regulation of endothelial cell migration; regulation of sprouting angiogenesis; neurotransmitter uptake; protein palmitoylation; glutamate metab…	nucleotide binding; ATP binding; catalytic activity; ligase activity; glutamate-ammonia ligase activity; metal ion binding; transferase activity; protein-cysteine S-palmitoyltransferase activity; protein binding; identical protein binding; magnesium ion binding; glutamate binding; manganese ion binding; dynein light chain binding	nucleus; cytoplasm; membrane; cytosol; endoplasmic reticulum; intracellular membrane-bounded organelle; mitochondrion; plasma membrane; extracellular exosome; rough endoplasmic reticulum; protein-containing complex; cell projection; neuron projection; perikaryon; myelin sheath; axon terminus; cell body; glial cell projection
SMIM26	1.05877e-07	-0.157582	0.555	0.678	0.0038752			membrane; integral component of membrane
MLH3	1.05932e-07	-0.127312	0.118	0.196	0.00387722	DNA repair; cellular response to DNA damage stimulus; mismatch repair; reciprocal meiotic recombination; synaptonemal complex assembly; male meiotic nuclear division; female meiosis I; protein localization	ATP binding; ATPase activity; mismatched DNA binding; protein binding; satellite DNA binding; chromatin binding; centromeric DNA binding	nucleus; mismatch repair complex; condensed chromosome; condensed nuclear chromosome; synaptonemal complex; male germ cell nucleus; chiasma
RGS17	1.06159e-07	-0.283032	0.406	0.493	0.00388553	positive regulation of GTPase activity; G protein-coupled receptor signaling pathway; negative regulation of signal transduction; response to amphetamine	protein binding; GTPase activator activity; GTPase activity	nucleus; cytoplasm; membrane; cell junction; synapse; plasma membrane; neuron projection
FAM110B	1.0864e-07	-0.168063	0.288	0.394	0.00397632			cytoplasm; cytosol; mitochondrion; cytoskeleton; microtubule organizing center
AKAP12	1.10212e-07	0.288035	0.425	0.344	0.00403386	protein targeting; signal transduction; adenylate cyclase-inhibiting G protein-coupled receptor signaling pathway; G protein-coupled receptor signaling pathway; regulation of protein kinase A signaling; positive regulation of protein kinase A signaling; regulation of protein kinase C signaling; response to lipopolysaccharide; hepatic stellate cell activation; positive regulation of tumor necrosis…	protein binding; protein kinase A binding; calmodulin binding; adenylate cyclase binding	cytoplasm; membrane; cytosol; plasma membrane; cytoskeleton; focal adhesion; cell cortex; neuronal cell body; Schaffer collateral - CA1 synapse
TM9SF2	1.12435e-07	-0.145537	0.324	0.433	0.00411522	protein localization to membrane		membrane; integral component of membrane; endosome; extracellular exosome; endosome membrane; integral component of plasma membrane
LINC00205	1.15108e-07	-0.189828	0.328	0.426	0.00421308
RPS27	1.18695e-07	0.145816	0.998	0.998	0.00434435	translation; rRNA processing; ribosomal small subunit assembly; cell population proliferation; viral transcription; translational initiation; nuclear-transcribed mRNA catabolic process, nonsense-mediated decay; SRP-dependent cotranslational protein targeting to membrane	RNA binding; metal ion binding; zinc ion binding; DNA binding; structural constituent of ribosome; protein binding	nucleus; ribosome; cytosolic small ribosomal subunit; nucleoplasm; cytosol; postsynaptic density; intracellular
SNTG1	1.23037e-07	0.277876	0.198	0.12	0.00450328	cell communication	actin binding; structural molecule activity; protein C-terminus binding; protein binding	nucleus; cytoplasm; cytoskeleton; ruffle membrane; dystrophin-associated glycoprotein complex; syntrophin complex
ZFHX3	1.23848e-07	0.413845	0.581	0.534	0.00453296	regulation of transcription, DNA-templated; circadian regulation of gene expression; positive regulation of transcription, DNA-templated; muscle organ development; negative regulation of transcription by RNA polymerase II; regulation of neuron differentiation; transcription by RNA polymerase II; brain development; positive regulation of transcription by RNA polymerase II; regulation of locomotor …	nucleic acid binding; zinc ion binding; metal ion binding; DNA binding; DNA-binding transcription factor activity; sequence-specific DNA binding; protein binding; RNA polymerase II proximal promoter sequence-specific DNA binding; DNA-binding transcription factor activity, RNA polymerase II-specific; DNA-binding transcription repressor activity, RNA polymerase II-specific; transcription regulatory…	nucleus; cytoplasm; nuclear chromatin; nucleoplasm; transcription factor complex; nuclear body
UGCG	1.26055e-07	-0.15266	0.428	0.541	0.00461375	lipid metabolic process; protein lipidation; glucosylceramide biosynthetic process; regulation of signal transduction; cell differentiation; keratinocyte differentiation; leptin-mediated signaling pathway; neuron development; establishment of skin barrier; intestinal lipid absorption; cornified envelope assembly; sphingolipid metabolic process; glycosphingolipid metabolic process; epidermis devel…	transferase activity; transferase activity, transferring glycosyl groups; ceramide glucosyltransferase activity; protein binding; dihydroceramide glucosyltransferase activity	membrane; integral component of membrane; Golgi apparatus; Golgi membrane
THAP5	1.26455e-07	-0.175517	0.284	0.384	0.00462836	cell cycle; regulation of transcription by RNA polymerase II; negative regulation of cell cycle	nucleic acid binding; metal ion binding; DNA binding; DNA-binding transcription factor activity, RNA polymerase II-specific; protease binding	nucleus; nuclear chromatin
KIAA0895L	1.27789e-07	-0.173741	0.335	0.446	0.00467721
AC010642.2	1.28744e-07	0.227251	0.536	0.452	0.00471215
PCDH11X	1.28955e-07	-0.140044	0.066	0.128	0.00471987	cell adhesion; homophilic cell adhesion via plasma membrane adhesion molecules; negative regulation of phosphatase activity	calcium ion binding	membrane; integral component of membrane; plasma membrane; integral component of plasma membrane
ZNF454	1.32615e-07	-0.123101	0.099	0.171	0.00485384	regulation of transcription, DNA-templated	nucleic acid binding; metal ion binding; DNA binding	nucleus; intracellular
RBMXL1	1.33682e-07	-0.127216	0.198	0.295	0.00489288	mRNA processing; RNA splicing; positive regulation of mRNA splicing, via spliceosome	nucleic acid binding; RNA binding	nucleus; spliceosomal complex; ribonucleoprotein complex
CSGALNACT2	1.38383e-07	-0.145532	0.232	0.332	0.00506496	chondroitin sulfate proteoglycan biosynthetic process; chondroitin sulfate biosynthetic process; dermatan sulfate proteoglycan biosynthetic process; proteoglycan biosynthetic process; dermatan sulfate proteoglycan biosynthetic process, polysaccharide chain biosynthetic process; chondroitin sulfate proteoglycan biosynthetic process, polysaccharide chain biosynthetic process	metal ion binding; transferase activity; protein binding; acetylgalactosaminyltransferase activity; glucuronylgalactosylproteoglycan 4-beta-N-acetylgalactosaminyltransferase activity	membrane; integral component of membrane; Golgi apparatus; Golgi cisterna membrane; integral component of Golgi membrane; Golgi membrane
ATP6V1C1	1.3848e-07	-0.115008	0.226	0.329	0.0050685	proton transmembrane transport; ion transport; ion transmembrane transport; insulin receptor signaling pathway; regulation of macroautophagy; transferrin transport; phagosome acidification	proton transmembrane transporter activity; protein binding; proton-exporting ATPase activity, phosphorylative mechanism; proton-transporting ATPase activity, rotational mechanism; transporter activity	proton-transporting V-type ATPase, V1 domain; lysosomal membrane; plasma membrane; cytosol; extracellular exosome; vacuolar proton-transporting V-type ATPase, V1 domain; proton-transporting two-sector ATPase complex; cytoplasm; cytoplasmic vesicle; apical part of cell
SLC41A3	1.41588e-07	-0.114504	0.132	0.214	0.00518225	cation transport; cation transmembrane transport	protein binding; cation transmembrane transporter activity	membrane; integral component of membrane; plasma membrane
ZFP69B	1.47322e-07	-0.116176	0.128	0.209	0.00539213	regulation of transcription, DNA-templated	DNA-binding transcription factor activity; nucleic acid binding; metal ion binding; DNA binding; protein binding; sequence-specific DNA binding	nucleus; intracellular
ZNF540	1.52869e-07	-0.129399	0.138	0.221	0.00559516	regulation of transcription, DNA-templated; negative regulation of translation; negative regulation of transcription, DNA-templated	nucleic acid binding; metal ion binding; DNA binding; protein binding; translation repressor activity, mRNA regulatory element binding	nucleus; cytoplasm; intracellular membrane-bounded organelle; cytosol; nucleoplasm; intracellular
ATP6V1G1	1.54226e-07	0.171495	0.943	0.945	0.00564484	proton transmembrane transport; ion transport; cellular iron ion homeostasis; ion transmembrane transport; insulin receptor signaling pathway; regulation of macroautophagy; transferrin transport; phagosome acidification; cellular response to increased oxygen levels	protein binding; ATPase-coupled transmembrane transporter activity; proton-exporting ATPase activity, phosphorylative mechanism; ATPase activity; ATPase binding	lysosomal membrane; cytosol; plasma membrane; vacuolar proton-transporting V-type ATPase complex; extracellular exosome
CTNNBIP1	1.55801e-07	0.157221	0.235	0.149	0.00570247	negative regulation of DNA-binding transcription factor activity; positive regulation of osteoblast differentiation; Wnt signaling pathway; negative regulation of transcription by RNA polymerase II; branching involved in ureteric bud morphogenesis; anterior/posterior pattern specification; negative regulation of Wnt signaling pathway; negative regulation of protein complex assembly; negative regu…	beta-catenin binding; protein binding; armadillo repeat domain binding	cytoplasm; nucleus; cytosol; nucleoplasm; beta-catenin destruction complex
LUC7L3	1.56187e-07	0.199454	0.916	0.913	0.0057166	mRNA processing; RNA splicing; mRNA splice site selection	RNA binding; mRNA binding; DNA binding; protein binding	nucleus; nuclear speck; nucleoplasm; U1 snRNP; U2-type prespliceosome
C11orf1	1.58256e-07	0.217494	0.353	0.263	0.00579233			nucleus; nucleoplasm
RCC2	1.59143e-07	0.139637	0.161	0.086	0.00582478	cell division; cell cycle; integrin-mediated signaling pathway; regulation of fibroblast migration; regulation of cell migration; negative regulation of GTPase activity; establishment of protein localization; negative regulation of focal adhesion assembly; activation of GTPase activity; negative regulation of substrate adhesion-dependent cell spreading; regulation of ruffle assembly; focal adhesi…	RNA binding; Rac GTPase binding; guanyl-nucleotide exchange factor activity; microtubule binding; protein binding; protein kinase binding; protein domain specific binding; small GTPase binding	nucleus; cytoplasm; membrane; chromosome; plasma membrane; cytoskeleton; microtubule; early endosome membrane; nucleolus; spindle; midbody; chromosome, centromeric region; cytosol; mitotic spindle midzone; chromosome, centromeric core domain
PFDN2	1.64949e-07	-0.134094	0.884	0.92	0.0060373	protein folding; positive regulation of cytoskeleton organization	protein binding; unfolded protein binding; protein folding chaperone	nucleus; cytoplasm; cytosol; mitochondrion; prefoldin complex
NEFM	1.66245e-07	0.714489	0.475	0.386	0.00608472	neurofilament bundle assembly; axon development	structural molecule activity; protein binding; structural constituent of cytoskeleton; microtubule binding	intermediate filament cytoskeleton; intermediate filament; neurofilament; axon; neurofibrillary tangle
AC067773.1	1.67412e-07	-0.115133	0.068	0.131	0.00612745
ZNF287	1.68534e-07	-0.112379	0.079	0.144	0.00616851	regulation of transcription, DNA-templated; regulation of cytokine biosynthetic process; positive regulation of transcription, DNA-templated	nucleic acid binding; metal ion binding; DNA binding; DNA-binding transcription factor activity	nucleus; intracellular
ATP5PB	1.75015e-07	0.195742	0.753	0.715	0.00640574	ion transport; ATP synthesis coupled proton transport; substantia nigra development; ATP biosynthetic process; cristae formation; mitochondrial ATP synthesis coupled proton transport	protein binding; proton transmembrane transporter activity; ATPase activity; proton-transporting ATP synthase activity, rotational mechanism; transmembrane transporter activity	nucleus; membrane; nucleoplasm; mitochondrion; mitochondrial inner membrane; mitochondrial matrix; mitochondrial proton-transporting ATP synthase complex, coupling factor F(o); mitochondrial proton-transporting ATP synthase complex; proton-transporting ATP synthase complex, coupling factor F(o); integral component of membrane
METTL26	1.79016e-07	-0.160061	0.509	0.609	0.00655218
CHGA	1.82905e-07	-0.146458	0.202	0.296	0.0066945	positive regulation of cardiac muscle contraction; negative regulation of blood vessel diameter; innate immune response; defense response to bacterium; defense response to Gram-negative bacterium; defense response to Gram-positive bacterium; mast cell chemotaxis; mast cell degranulation; antimicrobial humoral response; killing of cells of other organism; regulation of blood pressure; positive reg…		extracellular space; membrane; extracellular region; perinuclear region of cytoplasm; cytoplasmic vesicle; secretory granule; mast cell granule; transport vesicle; transport vesicle membrane; chromaffin granule
COPS7A	1.83438e-07	-0.118643	0.164	0.253	0.00671401	COP9 signalosome assembly; post-translational protein modification; viral process; protein deneddylation; transcription-coupled nucleotide-excision repair; nucleotide-excision repair, DNA damage recognition	protein binding	nucleus; cytoplasm; cytosol; nucleoplasm; COP9 signalosome
[truncated: 1,105 more rows]
