# Supplementary material for: FGF8-mediated gene regulation affects regional identity in human cerebral organoids
Source: eLife. 2024 Nov 1;13:e98096. doi: 10.7554/eLife.98096 (PMC11581432; doi:10.7554/eLife.98096)
Supplement: Figure 7—source data 1. — Summary Excel datasheet with counts of cells expressing A/P markers (PAX6, ER81, ETV5, WNT7B, EMX2, NR2F1, FGFR3, CRYM, TSHZ2, and ODZ3) within glutamatergic progenitor (clusters 2, 5, 12, 14, 15) and neuron (clusters 1, 3, 4) groups for both WNTi and WNTi + FGF8 samples, extracted via 10 X Genomics Loupe Browser. [file elife-98096-fig7-data1.xlsx]

## Sheet: Arealization
TOTAL CONDITION
		Total cells					Total cells			%					Total cells			%					Total cells			%					Total cells			%					Total cells			%					Total cells
	n° cells	All	WNTi	FGF8		NR2F1	All	WNTi	FGF8	WNTi	FGF8			FGFR3	All	WNTi	FGF8	WNTi	FGF8			ER81 (ETV1)	All	WNTi	FGF8	WNTi	FGF8			WNT7B	All	WNTi	FGF8	WNTi	FGF8			EMX2	All	WNTi	FGF8	WNTi	FGF8			PAX6	All	WNTi	FGF8
neurons	Cluster 1	2148	1997	151	neurons	Cluster 1		1435	19	71.8578	12.5828		neurons	Cluster 1		50	0	2.50376	0		neurons	Cluster 1		189	17	9.4642	11.2583		neurons	Cluster 1		493	43	24.687	28.4768		neurons	Cluster 1		329	36	16.4747	23.8411		neurons	Cluster 1		205	20
	Cluster 2	1476	1112	364		Cluster 2		1006	63	90.4676	17.3077			Cluster 2		643	19	57.8237	5.21978			Cluster 2		242	177	21.7626	48.6264			Cluster 2		55	52	4.94604	14.2857			Cluster 2		862	235	77.518	64.5604			Cluster 2		988	319
	Cluster 3	1434	1106	328		Cluster 3		847	57	76.5823	17.378			Cluster 3		151	14	13.6528	4.26829			Cluster 3		33	175	2.98373	53.3537			Cluster 3		342	132	30.9222	40.2439			Cluster 3		501	166	45.2984	50.6098			Cluster 3		674	207
	Cluster 4	1339	1022	317		Cluster 4		865	48	84.638	15.142			Cluster 4		34	0	3.32681	0			Cluster 4		44	161	4.30528	50.7886			Cluster 4		176	95	17.2211	29.9685			Cluster 4		219	128	21.4286	40.3785			Cluster 4		245	110
NPs	Cluster 5	1328	737	591	NPs	Cluster 5		599	92	81.2754	15.5668		NPs	Cluster 5		333	32	45.1832	5.41455		NPs	Cluster 5		196	263	26.5943	44.5008		NPs	Cluster 5		29	90	3.93487	15.2284		NPs	Cluster 5		499	339	67.7069	57.3604		NPs	Cluster 5		606	506
	Cluster 12	944	648	296		Cluster 12		612	29	94.4444	9.7973			Cluster 12		352	11	54.321	3.71622			Cluster 12		184	157	28.3951	53.0405			Cluster 12		36	37	5.55556	12.5			Cluster 12		542	192	83.642	64.8649			Cluster 12		598	262
	Cluster 14	861	568	293		Cluster 14		535	37	94.1901	12.628			Cluster 14		362	15	63.7324	5.11945			Cluster 14		248	206	43.662	70.3072			Cluster 14		52	55	9.15493	18.7713			Cluster 14		387	164	68.1338	55.9727			Cluster 14		512	262
	Cluster 15	812	495	317		Cluster 15		462	63	93.3333	19.8738			Cluster 15		238	14	48.0808	4.4164			Cluster 15		145	206	29.2929	64.9842			Cluster 15		26	40	5.25253	12.6183			Cluster 15		391	197	78.9899	62.1451			Cluster 15		467	290
		10342	7685	2657		TOTAL	0	6361	408	82.7716	15.3557			TOTAL	0	2163	105	28.1457	3.95183			TOTAL	0	1281	1362	16.6688	51.2608			TOTAL	0	1209	544	15.7319	20.4742			TOTAL	0	3730	1457	48.5361	54.8363			TOTAL	0	4295	1976
						in	Cluster X							in	Cluster X							in	Cluster X							in	Cluster X							in	Cluster X							in	Cluster X
						NR2F1	>	0						FGFR3	>	0						ER81 (ETV1)	>	0						WNT7B	>	0						EMX2	>	0						PAX6	>	0
						in	FGF8 or CTL							in	FGF8 or CTL							in	FGF8 or CTL							in	FGF8 or CTL							in	FGF8 or CTL							in	FGF8 or CTL
		Total cells					Total cells			%					Total cells			%					Total cells			%					Total cells			%					Total cells			%					Total cells
		All	WNTi	FGF8		NR2F1	All	WNTi	FGF8	WNTi	FGF8			FGFR3	All	WNTi	FGF8	WNTi	FGF8			ER81 (ETV1)	All	WNTi	FGF8	WNTi	FGF8			WNT7B	All	WNTi	FGF8	WNTi	FGF8			EMX2	All	WNTi	FGF8	WNTi	FGF8			PAX6	All	WNTi	FGF8
	neurons	4921	4125	796		neurons		3147	124	76.2909	15.5779			neurons		235	14	5.69697	1.75879			neurons		266	353	6.44848	44.3467			neurons		1011	270	24.5091	33.9196			neurons		1049	330	25.4303	41.4573			neurons		1124	337
	NPs	5421	3560	1861		NPs		3214	284	90.2809	15.2606			NPs		1928	91	54.1573	4.88984			NPs		1015	1009	28.5112	54.2182			NPs		198	274	5.5618	14.7233			NPs		2681	1127	75.309	60.5588			NPs		3171	1639
		10342	7685	2657		total	0	6361	408	82.7716	15.3557			total	0	2163	105	28.1457	3.95183			total	0	1281	1362	16.6688	51.2608			total	0	1209	544	15.7319	20.4742			total	0	3730	1457	48.5361	54.8363			total	0	4295	1976
							%				%			Error bars
						neurons	WNTi	FGF8		NPs	WNTi	FGF8		neurons	WNTi	FGF8		NPs	WNTi	FGF8
						PAX6	27.2485	42.3367		PAX6	89.073	88.0709		PAX6	1.41711	3.70693		PAX6	0.137138	1.26209
						ER81 (ETV1)	6.44848	44.3467		ER81 (ETV1)	28.5112	54.2182		ER81 (ETV1)	0.319224	4.57368		ER81 (ETV1)	1.60057	2.8112
						ETV5	2.2303	1.63317		ETV5	16.9382	20.9027		ETV5	0.33157	0.619357		ETV5	0.0987493	3.09346
						WNT7B	24.5091	33.9196		WNT7B	5.5618	14.7233		WNT7B	1.63404	1.8939		WNT7B	1.09256	0.752173
						EMX2	25.4303	41.4573		EMX2	75.309	60.5588		EMX2	0.389771	1.40934		EMX2	2.66434	1.01166
						NR2F1	76.2909	15.5779		NR2F1	90.2809	15.2606		NR2F1	3.34127	4.34062		NR2F1	0.433891	3.6724
						FGFR3	5.69697	1.75879		FGFR3	54.1573	4.88984		FGFR3	0.321869	0.294152		FGFR3	1.78898	2.50092
						CRYM	3.24848	0.628141		CRYM	0.449438	0.698549		CRYM	0.835097	0.221467		CRYM	0.119459	0.293883
						TSHZ2	11.0061	11.809		TSHZ2	13.3146	4.72864		TSHZ2	0.478836	1.59497		TSHZ2	1.08296	1.0848
						ODZ3 (TENM3)	31.0788	17.2111		ODZ3 (TENM3)	13.9607	18.6996		ODZ3 (TENM3)	0.031746	2.24368		ODZ3 (TENM3)	0.876116	2.63594
CTRLa and FGF8a
		Total cells					Total cells			%					Total cells			%					Total cells			%					Total cells			%					Total cells			%					Total cells
	n° cells	All	WNTi	FGF8		NR2F1	All	WNTi	FGF8	WNTi	FGF8			FGFR3	All	WNTi	FGF8	WNTi	FGF8			ER81 (ETV1)	All	WNTi	FGF8	WNTi	FGF8			WNT7B	All	WNTi	FGF8	WNTi	FGF8			EMX2	All	WNTi	FGF8	WNTi	FGF8			PAX6	All	WNTi	FGF8
neurons	Cluster 1	1147	1047	100	neurons	Cluster 1		797	10	76.1223	10		neurons	Cluster 1		29	0	2.76982	0		neurons	Cluster 1		105	11	10.0287	11		neurons	Cluster 1		243	31	23.2092	31		neurons	Cluster 1		164	24	15.6638	24		neurons	Cluster 1		96	10
	Cluster 2	791	568	223		Cluster 2		518	36	91.1972	16.1435			Cluster 2		339	8	59.6831	3.58744			Cluster 2		118	108	20.7746	48.4305			Cluster 2		33	34	5.80986	15.2466			Cluster 2		458	145	80.6338	65.0224			Cluster 2		506	196
	Cluster 3	751	525	226		Cluster 3		423	31	80.5714	13.7168			Cluster 3		67	10	12.7619	4.42478			Cluster 3		16	114	3.04762	50.4425			Cluster 3		172	90	32.7619	39.823			Cluster 3		235	115	44.7619	50.885			Cluster 3		321	134
	Cluster 4	709	528	181		Cluster 4		451	22	85.4167	12.1547			Cluster 4		17	0	3.2197	0			Cluster 4		21	83	3.97727	45.8564			Cluster 4		66	44	12.5	24.3094			Cluster 4		127	66	24.053	36.4641			Cluster 4		126	57
NPs	Cluster 5	741	363	378	NPs	Cluster 5		296	45	81.5427	11.9048		NPs	Cluster 5		179	10	49.3113	2.6455		NPs	Cluster 5		90	182	24.7934	48.1481		NPs	Cluster 5		18	62	4.95868	16.4021		NPs	Cluster 5		259	220	71.3499	58.2011		NPs	Cluster 5		292	317
	Cluster 12	480	313	167		Cluster 12		296	16	94.5687	9.58084			Cluster 12		175	5	55.9105	2.99401			Cluster 12		81	87	25.8786	52.0958			Cluster 12		19	23	6.07029	13.7725			Cluster 12		267	101	85.3035	60.479			Cluster 12		291	148
	Cluster 14	442	291	151		Cluster 14		276	8	94.8454	5.29801			Cluster 14		188	2	64.6048	1.3245			Cluster 14		127	99	43.6426	65.5629			Cluster 14		34	25	11.6838	16.5563			Cluster 14		205	82	70.4467	54.3046			Cluster 14		264	133
	Cluster 15	449	273	176		Cluster 15		254	29	93.0403	16.4773			Cluster 15		130	6	47.619	3.40909			Cluster 15		71	110	26.0073	62.5			Cluster 15		16	24	5.86081	13.6364			Cluster 15		220	106	80.5861	60.2273			Cluster 15		255	159
		5510	3908	1602		TOTAL	0	3311	197	84.7236	12.2971			TOTAL	0	1124	41	28.7615	2.5593			TOTAL	0	629	794	16.0952	49.563			TOTAL	0	601	333	15.3787	20.7865			TOTAL	0	1935	859	49.5138	53.6205			TOTAL	0	2151	1154
						in	Cluster X							in	Cluster X							in	Cluster X							in	Cluster X							in	Cluster X							in	Cluster X
						NR2F1	>	0						FGFR3	>	0						ER81 (ETV1)	>	0						WNT7B	>	0						EMX2	>	0						PAX6	>	0
						in	FGF8 or CTL							in	FGF8 or CTL							in	FGF8 or CTL							in	FGF8 or CTL							in	FGF8 or CTL							in	FGF8 or CTL
		Total cells					Total cells			%					Total cells			%					Total cells			%					Total cells			%					Total cells			%					Total cells
		All	WNTi	FGF8		NR2F1	All	WNTi	FGF8	WNTi	FGF8			FGFR3	All	WNTi	FGF8	WNTi	FGF8			ER81 (ETV1)	All	WNTi	FGF8	WNTi	FGF8			WNT7B	All	WNTi	FGF8	WNTi	FGF8			EMX2	All	WNTi	FGF8	WNTi	FGF8			PAX6	All	WNTi	FGF8
	neurons	2607	2100	507		neurons		1671	63	79.5714	12.426			neurons		113	10	5.38095	1.97239			neurons		142	208	6.7619	41.0256			neurons		481	165	22.9048	32.5444			neurons		526	205	25.0476	40.4339			neurons		543	201
	NPs	2903	1808	1095		NPs		1640	134	90.708	12.2374			NPs		1011	31	55.9181	2.83105			NPs		487	586	26.9358	53.516			NPs		120	168	6.63717	15.3425			NPs		1409	654	77.9314	59.726			NPs		1608	953
		5510	3908	1602		total	0	3311	197	84.7236	12.2971			total	0	1124	41	28.7615	2.5593			total	0	629	794	16.0952	49.563			total	0	601	333	15.3787	20.7865			total	0	1935	859	49.5138	53.6205			total	0	2151	1154
							%				%
						neurons	WNTi	FGF8		NPs	WNTi	FGF8
						PAX6	25.8571	39.645		PAX6	88.9381	87.032
						ER81 (ETV1)	6.7619	41.0256		ER81 (ETV1)	26.9358	53.516
						ETV5	1.90476	1.18343		ETV5	17.0354	18.3562
						WNT7B	22.9048	32.5444		WNT7B	6.63717	15.3425
						EMX2	25.0476	40.4339		EMX2	77.9314	59.726
						NR2F1	79.5714	12.426		NR2F1	90.708	12.2374
						FGFR3	5.38095	1.97239		FGFR3	55.9181	2.83105
						CRYM	2.42857	0.788955		CRYM	0.331858	0.456621
						TSHZ2	11.4762	10.6509		TSHZ2	14.3805	3.83562
						ODZ3 (TENM3)	31.0476	15.5819		ODZ3 (TENM3)	14.823	16.5297
CTRLb and FGF8b
		Total cells					Total cells			%					Total cells			%					Total cells			%					Total cells			%					Total cells			%					Total cells
	n° cells	All	WNTi	FGF8		NR2F1	All	WNTi	FGF8	WNTi	FGF8			FGFR3	All	WNTi	FGF8	WNTi	FGF8			ER81 (ETV1)	All	WNTi	FGF8	WNTi	FGF8			WNT7B	All	WNTi	FGF8	WNTi	FGF8			EMX2	All	WNTi	FGF8	WNTi	FGF8			PAX6	All	WNTi	FGF8
neurons	Cluster 1	1001	950	51	neurons	Cluster 1		638	9	67.1579	17.6471		neurons	Cluster 1		21	0	2.21053	0		neurons	Cluster 1		84	6	8.84211	11.7647		neurons	Cluster 1		250	12	26.3158	23.5294		neurons	Cluster 1		165	12	17.3684	23.5294		neurons	Cluster 1		109	10
	Cluster 2	685	544	141		Cluster 2		488	27	89.7059	19.1489			Cluster 2		304	11	55.8824	7.80142			Cluster 2		124	69	22.7941	48.9362			Cluster 2		22	18	4.04412	12.766			Cluster 2		404	90	74.2647	63.8298			Cluster 2		482	123
	Cluster 3	683	581	102		Cluster 3		424	26	72.9776	25.4902			Cluster 3		84	4	14.4578	3.92157			Cluster 3		17	61	2.92599	59.8039			Cluster 3		170	42	29.2599	41.1765			Cluster 3		266	51	45.7831	50			Cluster 3		353	73
	Cluster 4	630	494	136		Cluster 4		414	26	83.8057	19.1176			Cluster 4		17	0	3.4413	0			Cluster 4		23	78	4.65587	57.3529			Cluster 4		110	51	22.2672	37.5			Cluster 4		92	62	18.6235	45.5882			Cluster 4		119	53
NPs	Cluster 5	587	374	213	NPs	Cluster 5		303	47	81.016	22.0657		NPs	Cluster 5		154	22	41.1765	10.3286		NPs	Cluster 5		106	111	28.3422	52.1127		NPs	Cluster 5		11	28	2.94118	13.1455		NPs	Cluster 5		240	119	64.1711	55.8685		NPs	Cluster 5		314	189
	Cluster 12	464	335	129		Cluster 12		316	13	94.3284	10.0775			Cluster 12		177	6	52.8358	4.65116			Cluster 12		103	70	30.7463	54.2636			Cluster 12		17	14	5.07463	10.8527			Cluster 12		275	91	82.0896	70.5426			Cluster 12		307	114
	Cluster 14	419	277	142		Cluster 14		259	29	93.5018	20.4225			Cluster 14		174	13	62.8159	9.15493			Cluster 14		121	107	43.6823	75.3521			Cluster 14		18	30	6.49819	21.1268			Cluster 14		182	82	65.704	57.7465			Cluster 14		248	129
	Cluster 15	363	222	141		Cluster 15		208	34	93.6937	24.1135			Cluster 15		108	8	48.6486	5.67376			Cluster 15		74	96	33.3333	68.0851			Cluster 15		10	16	4.5045	11.3475			Cluster 15		171	91	77.027	64.539			Cluster 15		212	131
		4832	3777	1055		TOTAL	0	3050	211	80.7519	20			TOTAL	0	1039	64	27.5086	6.06635			TOTAL	0	652	598	17.2624	56.6825			TOTAL	0	608	211	16.0974	20			TOTAL	0	1795	598	47.5245	56.6825			TOTAL	0	2144	822
						in	Cluster X							in	Cluster X							in	Cluster X							in	Cluster X							in	Cluster X							in	Cluster X
						NR2F1	>	0						FGFR3	>	0						ER81 (ETV1)	>	0						WNT7B	>	0						EMX2	>	0						PAX6	>	0
						in	FGF8 or CTL							in	FGF8 or CTL							in	FGF8 or CTL							in	FGF8 or CTL							in	FGF8 or CTL							in	FGF8 or CTL
		Total cells					Total cells			%					Total cells			%					Total cells			%					Total cells			%					Total cells			%					Total cells
		All	WNTi	FGF8		NR2F1	All	WNTi	FGF8	WNTi	FGF8			FGFR3	All	WNTi	FGF8	WNTi	FGF8			ER81 (ETV1)	All	WNTi	FGF8	WNTi	FGF8			WNT7B	All	WNTi	FGF8	WNTi	FGF8			EMX2	All	WNTi	FGF8	WNTi	FGF8			PAX6	All	WNTi	FGF8
	neurons	2314	2025	289		neurons		1476	61	72.8889	21.1073			neurons		122	4	6.02469	1.38408			neurons		124	145	6.12346	50.173			neurons		530	105	26.1728	36.3322			neurons		523	125	25.8272	43.2526			neurons		581	136
	NPs	2518	1752	766		NPs		1574	150	89.8402	19.5822			NPs		917	60	52.3402	7.8329			NPs		528	453	30.137	59.1384			NPs		78	106	4.45205	13.8381			NPs		1272	473	72.6027	61.7493			NPs		1563	686
		4832	3777	1055		total	0	3050	211	80.7519	20			total	0	1039	64	27.5086	6.06635			total	0	652	598	17.2624	56.6825			total	0	608	211	16.0974	20			total	0	1795	598	47.5245	56.6825			total	0	2144	822
							%				%
						neurons	WNTi	FGF8		NPs	WNTi	FGF8
						PAX6	28.6914	47.0588		PAX6	89.2123	89.5561
						ER81 (ETV1)	6.12346	50.173		ER81 (ETV1)	30.137	59.1384
						ETV5	2.5679	2.42215		ETV5	16.8379	24.5431
						WNT7B	26.1728	36.3322		WNT7B	4.45205	13.8381
						EMX2	25.8272	43.2526		EMX2	72.6027	61.7493
						NR2F1	72.8889	21.1073		NR2F1	89.8402	19.5822
						FGFR3	6.02469	1.38408		FGFR3	52.3402	7.8329
						CRYM	4.09877	0.346021		CRYM	0.570776	1.04439
						TSHZ2	10.5185	13.8408		TSHZ2	12.2146	6.00522
						ODZ3 (TENM3)	31.1111	20.0692		ODZ3 (TENM3)	13.0708	21.8016
						statistic analysis								statistic analysis								statistic analysis								statistic analysis								statistic analysis								statistic analysis
						WNTi								WNTi								WNTi								WNTi								WNTi								WNTi
						NR2F1	batch a	batch b		TEST.T					batch a	batch b		TEST.T					batch a	batch b		TEST.T					batch a	batch b		TEST.T					batch a	batch b		TEST.T					batch a	batch b
						neurons	79.5714	72.8889		neurons	0.0083793			neurons	5.38095	6.02469		neurons	0.0115354			neurons	6.7619	6.12346		neurons	0.0134342			neurons	22.9048	26.1728		neurons	0.0583174			neurons	25.0476	25.8272		neurons	0.00785057			neurons	25.8571	28.6914
						NPs	90.708	89.8402		NPs	0.00246369			NPs	55.9181	52.3402		NPs	0.00394728			NPs	26.9358	30.137		NPs	0.0132802			NPs	6.63717	4.45205		NPs	0.0208331			NPs	77.9314	72.6027		NPs	0.0363878			NPs	88.9381	89.2123
						WNTi+FGF8								WNTi+FGF8								WNTi+FGF8								WNTi+FGF8								WNTi+FGF8								WNTi+FGF8
						NR2F1	batch a	batch b							batch a	batch b							batch a	batch b							batch a	batch b							batch a	batch b							batch a	batch b
						neurons	12.426	21.1073						neurons	1.97239	1.38408						neurons	41.0256	50.173						neurons	32.5444	36.3322						neurons	40.4339	43.2526						neurons	39.645	47.0588
						NPs	12.2374	19.5822						NPs	2.83105	7.8329						NPs	53.516	59.1384						NPs	15.3425	13.8381						NPs	59.726	61.7493						NPs	87.032	89.5561
[truncated: 26 more columns]
